# Supplementary material for: YAP-Mediated Recruitment of YY1 and EZH2 Represses Transcription of Key Cell-Cycle Regulators
Source: Oxford University Press journal article supplement (doi:10.1158/0008-5472.can-19-2415), 2020-05-14
Supplement: 00085472can192415-sup-226803_2_supp_6223636_q8m11f.xlsx [file 00085472can192415-sup-226803_2_supp_6223636_q8m11f.xlsx]

## Sheet: Sheet1
Table S2 - List of YAP peak annotations
PeakID (cmd=annotatePeaks.pl ../Yap_final.narrowPeak hg19 -gene genes.fpkm_tracking -go Yap_GO -annStats Yap_annstats.txt)	Chr	Start	End	Strand	Peak Score	Focus Ratio/Region Size	Annotation	Detailed Annotation	Distance to TSS	Nearest PromoterID	Entrez ID	Nearest Unigene	Nearest Refseq	Nearest Ensembl	Gene Name	Gene Alias	Gene Description	Gene Type	tracking_id
Yap_catlast-only89i_peak_13130	chr19	6466477	6466679	+	1456	NA	TTS (NM_001290331)	TTS (NM_001290331)	2329	NM_139161	92359	Hs.150319	NM_139161	ENSG00000130545	CRB3	-	crumbs 3, cell polarity complex component	protein-coding	CRB3
Yap_catlast-only89i_peak_13030	chr19	2462858	2463600	+	1334	NA	Intergenic	L1M3e|LINE|L1	-1046	NR_134931	101928602	Hs.541407	NR_134931	ENSG00000267201	LINC01775	-	long intergenic non-protein coding RNA 1775	ncRNA
Yap_catlast-only89i_peak_24540	chr7	46184884	46185538	+	1329	NA	Intergenic	Intergenic	-224340	NM_001013398	3486	Hs.450230	NM_000598	ENSG00000146674	IGFBP3	BP-53|IBP3	insulin like growth factor binding protein 3	protein-coding
Yap_catlast-only89i_peak_10674	chr16	68271231	68272051	+	1308	NA	Intergenic	CpG-9434	-1505	NM_024939	80004	Hs.436585	NM_024939	ENSG00000103067	ESRP2	RBM35B	epithelial splicing regulatory protein 2	protein-coding	ESRP2
Yap_catlast-only89i_peak_13041	chr19	2540639	2541354	+	1199	NA	intron (NM_052847, intron 3 of 4)	CpG	64873	NM_015675	4616	Hs.110571	NM_015675	ENSG00000099860	GADD45B	GADD45BETA|MYD118	growth arrest and DNA damage inducible beta	protein-coding	GADD45B
Yap_catlast-only89i_peak_18582	chr3	134092923	134093710	+	1162	NA	5' UTR (NM_016201, exon 1 of 10)	5' UTR (NM_016201, exon 1 of 10)	111	NM_001278685	51421	Hs.426312	NM_016201	ENSG00000114019	AMOTL2	LCCP	angiomotin like 2	protein-coding
Yap_catlast-only89i_peak_5414	chr11	73019853	73020668	+	1133	NA	exon (NM_014786, exon 1 of 21)	exon (NM_014786, exon 1 of 21)	597	NM_014786	9828	Hs.533719	NM_014786	ENSG00000110237	ARHGEF17	P164RHOGEF|RHOGEF17|TEM4|p164-RhoGEF	Rho guanine nucleotide exchange factor 17	protein-coding	ARHGEF17
Yap_catlast-only89i_peak_5339	chr11	69235164	69235869	+	1119	NA	Intergenic	Intergenic	-4923	NM_001319657	102724265	Hs.448669	NM_001319657	ENSG00000255980	LOC102724265	-	uncharacterized LOC102724265	protein-coding
Yap_catlast-only89i_peak_28848	chrX	112022186	112022908	+	1099	NA	exon (NM_001113490, exon 10 of 11)	exon (NM_001113490, exon 10 of 11)	1469	NR_036255	100423009		NR_036255	ENSG00000126016	MIR4329	-	microRNA 4329	ncRNA	MIR4329
Yap_catlast-only89i_peak_13492	chr19	34972239	34972957	+	1096	NA	promoter-TSS (NM_001080436)	promoter-TSS (NM_001080436)	-282	NM_001080436	126374	Hs.585010	NM_001080436	ENSG00000142279	WTIP	-	Wilms tumor 1 interacting protein	protein-coding	WTIP
Yap_catlast-only89i_peak_3170	chr10	60616150	60616908	+	1093	NA	Intergenic	Intergenic	141754	NR_027508	728640	Hs.729209	NR_027508		FAM133CP	-	family with sequence similarity 133, member A pseudogene	pseudo	FAM133CP
Yap_catlast-only89i_peak_24071	chr7	5631001	5631703	+	1058	NA	Intergenic	Intergenic	-1084	NM_003088	6624	Hs.118400	NM_003088	ENSG00000075618	FSCN1	FAN1|HSN|SNL|p55	fascin actin-bundling protein 1	protein-coding	FSCN1
Yap_catlast-only89i_peak_18569	chr3	134045634	134046332	+	1054	NA	Intergenic	Intergenic	40721	NR_106885	102466744		NR_106885	ENSG00000277723	MIR6827	hsa-mir-6827	microRNA 6827	ncRNA	MIR6827
Yap_catlast-only89i_peak_18031	chr3	58546347	58546928	+	992	NA	Intergenic	Intergenic	16854	NM_001076778	11170	Hs.506357	NM_007177	ENSG00000168309	FAM107A	DRR1|TU3A	family with sequence similarity 107 member A	protein-coding
Yap_catlast-only89i_peak_11052	chr16	88340525	88341303	+	992	NA	Intergenic	L1MB7|LINE|L1	113027	NR_110944	101928880	Hs.634835	NR_110944	ENSG00000260420	LOC101928880	LA16c-444G7.2	uncharacterized LOC101928880	ncRNA	LOC101928880
Yap_catlast-only89i_peak_16935	chr22	19868535	19869213	+	942	NA	intron (NM_006440, intron 12 of 17)	intron (NM_006440, intron 12 of 17)	-26412	NM_053004	54584	Hs.105642	NM_053004	ENSG00000185838	GNB1L	DGCRK3|FKSG1|GY2|WDR14|WDVCF	G protein subunit beta 1 like	protein-coding	GNB1L
Yap_catlast-only89i_peak_13707	chr19	45879488	45880545	+	925	NA	Intergenic	AluSx3|SINE|Alu	-6171	NM_001130867	2068	Hs.487294	NM_000400	ENSG00000104884	ERCC2	COFS2|EM9|TFIIH|TTD|TTD1|XPD	ERCC excision repair 2, TFIIH core complex helicase subunit	protein-coding
Yap_catlast-only89i_peak_12438	chr18	3261304	3262217	+	923	NA	promoter-TSS (NR_130143)	promoter-TSS (NR_130143)	68	NR_130143	104968399	Hs.464472	NR_130143	ENSG00000264235	LOC104968399	-	uncharacterized LOC104968399	ncRNA	LOC104968399
Yap_catlast-only89i_peak_4844	chr11	44863571	44864318	+	914	NA	intron (NM_130783, intron 1 of 8)	intron (NM_130783, intron 1 of 8)	77968	NM_130783	90139	Hs.385634	NM_130783	ENSG00000157570	TSPAN18	TSPAN	tetraspanin 18	protein-coding	TSPAN18
Yap_catlast-only89i_peak_10694	chr16	68857166	68857875	+	907	NA	exon (NM_001317184, exon 12 of 15)	exon (NM_001317184, exon 12 of 15)	-19989	NM_024562	79613	Hs.13526	NM_024562	ENSG00000103047	TANGO6	TMCO7	transport and golgi organization 6 homolog	protein-coding	TANGO6
Yap_catlast-only89i_peak_5293	chr11	67780521	67781162	+	902	NA	intron (NM_001030010, intron 1 of 10)	intron (NM_001030010, intron 1 of 10)	3066	NM_001290058	221	Hs.523841	NM_000694	ENSG00000006534	ALDH3B1	ALDH4|ALDH7	aldehyde dehydrogenase 3 family member B1	protein-coding
Yap_catlast-only89i_peak_7416	chr12	107487606	107488290	+	898	NA	promoter-TSS (NM_004075)	promoter-TSS (NM_004075)	-313	NM_004075	1407	Hs.151573	NM_004075	ENSG00000008405	CRY1	PHLL1	cryptochrome circadian clock 1	protein-coding	CRY1
Yap_catlast-only89i_peak_26971	chr8	130527753	130528315	+	892	NA	intron (NR_130917, intron 1 of 3)	MLT1C|LTR|ERVL-MaLR	-31646	NR_037457	100500839		NR_037457	ENSG00000263763	MIR3686	-	microRNA 3686	ncRNA	MIR3686
Yap_catlast-only89i_peak_25556	chr7	151451059	151451723	+	880	NA	intron (NM_016203, intron 3 of 15)	intron (NM_016203, intron 3 of 15)	-17991	NM_001304527	51422	Hs.647072	NM_016203	ENSG00000106617	PRKAG2	AAKG|AAKG2|CMH6|H91620p|WPWS	protein kinase AMP-activated non-catalytic subunit gamma 2	protein-coding
Yap_catlast-only89i_peak_17282	chr22	39572154	39572648	+	858	NA	Intergenic	Intergenic	-23746	NM_001346743	23492	Hs.356416	NM_175709	ENSG00000100307	CBX7	-	chromobox 7	protein-coding
Yap_catlast-only89i_peak_4289	chr11	843973	844686	+	835	NA	promoter-TSS (NM_001025237)	promoter-TSS (NM_001025237)	-117	NM_001025237	7106	Hs.654836	NM_003271	ENSG00000214063	TSPAN4	NAG-2|NAG2|TETRASPAN|TM4SF7|TSPAN-4	tetraspanin 4	protein-coding
Yap_catlast-only89i_peak_22151	chr5	176621178	176621682	+	832	NA	intron (NM_172349, intron 4 of 23)	AluJb|SINE|Alu	60597	NM_022455	64324	Hs.106861	NM_022455	ENSG00000165671	NSD1	ARA267|KMT3B|SOTOS|SOTOS1|STO	nuclear receptor binding SET domain protein 1	protein-coding	NSD1
Yap_catlast-only89i_peak_598	chr1	29450848	29451487	+	831	NA	promoter-TSS (NM_001003682)	promoter-TSS (NM_001003682)	-746	NM_001003682	399474	Hs.712722	NM_001003682	ENSG00000253304	TMEM200B	TTMB	transmembrane protein 200B	protein-coding	TMEM200B
Yap_catlast-only89i_peak_18640	chr3	139021092	139021568	+	819	NA	Intergenic	Intergenic	-41531	NM_020191	56945	Hs.745001	NM_020191	ENSG00000175110	MRPS22	C3orf5|COXPD5|GIBT|GK002|MRP-S22|RPMS22	mitochondrial ribosomal protein S22	protein-coding	MRPS22
Yap_catlast-only89i_peak_7779	chr13	21635305	21636077	+	809	NA	promoter-TSS (NM_014572)	promoter-TSS (NM_014572)	31	NM_014572	26524	Hs.78960	NM_014572	ENSG00000150457	LATS2	KPM	large tumor suppressor kinase 2	protein-coding	LATS2
Yap_catlast-only89i_peak_6228	chr12	3068286	3069004	+	809	NA	promoter-TSS (NM_201443)	promoter-TSS (NM_201443)	-103	NM_201443	7004	Hs.94865	NM_003213	ENSG00000197905	TEAD4	EFTR-2|RTEF1|TCF13L1|TEF-3|TEF3|TEFR-1|hRTEF-1B	TEA domain transcription factor 4	protein-coding
Yap_catlast-only89i_peak_8422	chr14	23449758	23450354	+	807	NA	intron (NM_001289097, intron 1 of 1)	CpG	1795	NM_001289097	84962	Hs.655832	NM_032876	ENSG00000129474	AJUBA	JUB	ajuba LIM protein	protein-coding
Yap_catlast-only89i_peak_20686	chr5	32852378	32852905	+	796	NA	Intergenic	Intergenic	-94908	NR_033832	340113	Hs.434404	NR_033832	ENSG00000248279	LINC02120	-	long intergenic non-protein coding RNA 2120	ncRNA
Yap_catlast-only89i_peak_11156	chr17	1617699	1618788	+	794	NA	promoter-TSS (NR_029494)	promoter-TSS (NR_029494)	-962	NR_029494	407004		NR_029494	ENSG00000186594	MIR22	MIRN22|hsa-mir-22|miR-22	microRNA 22	ncRNA	MIR22
Yap_catlast-only89i_peak_14469	chr2	64881154	64881903	+	788	NA	promoter-TSS (NM_014755)	promoter-TSS (NM_014755)	-482	NM_014755	9792	Hs.591569	NM_014755	ENSG00000179833	SERTAD2	Sei-2|TRIP-Br2	SERTA domain containing 2	protein-coding	SERTAD2
Yap_catlast-only89i_peak_21849	chr5	150016840	150017637	+	783	NA	intron (NM_001166209, intron 2 of 2)	intron (NM_001166209, intron 2 of 2)	-2969	NM_007286	11346	Hs.435228	NM_007286	ENSG00000171992	SYNPO	-	synaptopodin	protein-coding	SYNPO
Yap_catlast-only89i_peak_17106	chr22	30602795	30603457	+	772	NA	Intergenic	Intergenic	39714	NM_001257135	3976	Hs.2250	NM_002309	ENSG00000128342	LIF	CDF|DIA|HILDA|MLPLI	leukemia inhibitory factor	protein-coding
Yap_catlast-only89i_peak_14941	chr2	151267298	151267877	+	771	NA	Intergenic	Intergenic	76622	NM_005168	390	Hs.6838	NM_005168	ENSG00000115963	RND3	ARHE|Rho8|RhoE|memB	Rho family GTPase 3	protein-coding	RND3
Yap_catlast-only89i_peak_18087	chr3	66101512	66102159	+	771	NA	Intergenic	MLT1J|LTR|ERVL-MaLR	-17450	NM_173471	115286	Hs.379386	NM_173471	ENSG00000144741	SLC25A26	COXPD28|SAMC	solute carrier family 25 member 26	protein-coding	SLC25A26
Yap_catlast-only89i_peak_23753	chr6	140029867	140030480	+	765	NA	Intergenic	Intergenic	-62037	NR_038399	100132735	Hs.62646	NR_038399		LOC100132735	-	uncharacterized LOC100132735	ncRNA	LOC100132735
Yap_catlast-only89i_peak_25411	chr7	134426857	134427657	+	764	NA	Intergenic	Intergenic	-36907	NM_004342	800	Hs.490203	NM_004342	ENSG00000122786	CALD1	CDM|H-CAD|HCAD|L-CAD|LCAD|NAG22	caldesmon 1	protein-coding	CALD1
Yap_catlast-only89i_peak_2154	chr1	205270529	205270973	+	761	NA	TTS (NM_030952)	TTS (NM_030952)	20168	NM_030952	81788	Hs.497512	NM_030952	ENSG00000163545	NUAK2	SNARK	NUAK family kinase 2	protein-coding	NUAK2
Yap_catlast-only89i_peak_1427	chr1	109045654	109046084	+	759	NA	Intergenic	Intergenic	52965	NM_001143987	653149	Hs.712226	NM_001143987	ENSG00000186086	NBPF6	-	neuroblastoma breakpoint family member 6	protein-coding	NBPF6
Yap_catlast-only89i_peak_2250	chr1	214724844	214725614	+	758	NA	promoter-TSS (NM_005401)	promoter-TSS (NM_005401)	-205	NM_005401	5784	Hs.193557	NM_005401	ENSG00000152104	PTPN14	PEZ|PTP36	protein tyrosine phosphatase, non-receptor type 14	protein-coding	PTPN14
Yap_catlast-only89i_peak_15623	chr2	235905040	235905706	+	756	NA	intron (NM_014521, intron 2 of 5)	intron (NM_014521, intron 2 of 5)	44745	NM_014521	23677	Hs.516777	NM_014521	ENSG00000130147	SH3BP4	BOG25|TTP	SH3 domain binding protein 4	protein-coding	SH3BP4
Yap_catlast-only89i_peak_7289	chr12	96031139	96031748	+	749	NA	Intergenic	Intergenic	-11588	NR_077225	100132594	Hs.676211	NR_077225	ENSG00000257150	PGAM1P5	-	phosphoglycerate mutase 1 pseudogene 5	pseudo	PGAM1P5
Yap_catlast-only89i_peak_19775	chr4	77511251	77511851	+	747	NA	intron (NM_020859, intron 2 of 10)	intron (NM_020859, intron 2 of 10)	14847	NR_039655	100616254		NR_039655	ENSG00000283682	MIR548AH	-	microRNA 548ah	ncRNA	MIR548AH
Yap_catlast-only89i_peak_1757	chr1	157989123	157989869	+	743	NA	intron (NM_001286349, intron 1 of 12)	intron (NM_001286349, intron 1 of 12)	26433	NM_018240	55243	Hs.272234	NM_018240	ENSG00000183853	KIRREL	NEPH1	kin of IRRE like (Drosophila)	protein-coding	KIRREL
Yap_catlast-only89i_peak_5341	chr11	69311880	69312451	+	742	NA	Intergenic	Intergenic	11836	NR_120545	101928292	Hs.736219	NR_120542		LINC01488	BRCAT8	long intergenic non-protein coding RNA 1488	ncRNA
Yap_catlast-only89i_peak_23612	chr6	121841849	121842392	+	740	NA	Intergenic	Intergenic	85397	NM_000165	2697	Hs.74471	NM_000165	ENSG00000152661	GJA1	AVSD3|CMDR|CX43|EKVP|GJAL|HLHS1|HSS|ODDD|PPKCA	gap junction protein alpha 1	protein-coding	GJA1
Yap_catlast-only89i_peak_17322	chr22	41686597	41687209	+	736	NA	intron (NM_001317930, intron 1 of 15)	intron (NM_001317930, intron 1 of 15)	-4648	NM_002883	5905	Hs.183800	NM_002883	ENSG00000100401	RANGAP1	Fug1|RANGAP|SD	Ran GTPase activating protein 1	protein-coding	RANGAP1
Yap_catlast-only89i_peak_18258	chr3	101561297	101561849	+	735	NA	intron (NM_001005474, intron 2 of 12)	intron (NM_001005474, intron 2 of 12)	-6785	NM_031419	64332	Hs.319171	NM_031419	ENSG00000144802	NFKBIZ	IKBZ|INAP|MAIL	NFKB inhibitor zeta	protein-coding	NFKBIZ
Yap_catlast-only89i_peak_2437	chr1	234908080	234908527	+	734	NA	Intergenic	Intergenic	48514	NR_038856	100506810	Hs.586634	NR_038856	ENSG00000227630	LINC01132	-	long intergenic non-protein coding RNA 1132	ncRNA	LINC01132
Yap_catlast-only89i_peak_23762	chr6	140383053	140383693	+	734	NA	intron (NR_121623, intron 1 of 1)	intron (NR_121623, intron 1 of 1)	-70975	NR_121624	103352541	Hs.582647	NR_121624		LOC103352541	-	uncharacterized LOC103352541	ncRNA	LOC103352541
Yap_catlast-only89i_peak_28855	chrX	112058584	112058764	+	733	NA	exon (NM_001113490, exon 2 of 11)	exon (NM_001113490, exon 2 of 11)	7680	NM_001113490	154796	Hs.528051	NM_133265	ENSG00000126016	AMOT	-	angiomotin	protein-coding
Yap_catlast-only89i_peak_26947	chr8	129188689	129189445	+	724	NA	Intergenic	Intergenic	26705	NR_031613	100302281		NR_031613	ENSG00000221261	MIR1208	MIRN1208|hsa-mir-1208	microRNA 1208	ncRNA	MIR1208
Yap_catlast-only89i_peak_27804	chr9	99182728	99183203	+	723	NA	Intergenic	Intergenic	-2296	NM_153695	195828	Hs.494557	NM_153695	ENSG00000165244	ZNF367	AFF29|CDC14B|ZFF29	zinc finger protein 367	protein-coding	ZNF367
Yap_catlast-only89i_peak_28851	chrX	112033824	112034003	+	719	NA	exon (NM_001113490, exon 7 of 11)	exon (NM_001113490, exon 7 of 11)	-9897	NR_036255	100423009		NR_036255	ENSG00000126016	MIR4329	-	microRNA 4329	ncRNA	MIR4329
Yap_catlast-only89i_peak_1107	chr1	65891305	65891864	+	712	NA	intron (NM_001003680, intron 2 of 19)	L2a|LINE|L2	5185	NM_001198681	54741	Hs.23581	NM_017526	ENSG00000213625	LEPROT	LEPR|OB-RGRP|OBRGRP|VPS55	leptin receptor overlapping transcript	protein-coding
Yap_catlast-only89i_peak_54	chr1	3464660	3465278	+	712	NA	intron (NM_001409, intron 4 of 36)	intron (NM_001409, intron 4 of 36)	12385	NR_030277	693135		NR_030277	ENSG00000207776	MIR551A	MIRN551A|mir-551a	microRNA 551a	ncRNA	MIR551A
Yap_catlast-only89i_peak_26750	chr8	119344808	119345527	+	712	NA	intron (NM_001101676, intron 4 of 4)	L2b|LINE|L2	-221109	NM_000127	2131	Hs.492618	NM_000127	ENSG00000182197	EXT1	EXT|LGCR|LGS|TRPS2|TTV	exostosin glycosyltransferase 1	protein-coding	EXT1
Yap_catlast-only89i_peak_3513	chr10	80917255	80917850	+	711	NA	intron (NM_020338, intron 3 of 24)	intron (NM_020338, intron 3 of 24)	88760	NM_020338	57178	Hs.193118	NM_020338	ENSG00000108175	ZMIZ1	MIZ|RAI17|TRAFIP10|ZIMP10|hZIMP10	zinc finger MIZ-type containing 1	protein-coding	ZMIZ1
Yap_catlast-only89i_peak_6653	chr12	46888092	46888574	+	709	NA	intron (NR_125380, intron 3 of 3)	intron (NR_125380, intron 3 of 3)	110443	NR_125381	100288798	Hs.525922	NR_125377		LOC100288798	-	uncharacterized LOC100288798	ncRNA
Yap_catlast-only89i_peak_13601	chr19	41729217	41729784	+	703	NA	intron (NM_021913, intron 4 of 19)	intron (NM_021913, intron 4 of 19)	-3160	NM_001278599	558	Hs.590970	NM_001699	ENSG00000167601	AXL	ARK|JTK11|Tyro7|UFO	AXL receptor tyrosine kinase	protein-coding
Yap_catlast-only89i_peak_2842	chr10	25051824	25052318	+	702	NA	Intergenic	Helitron1Na_Mam|RC|Helitron	-39474	NM_020824	57584	Hs.524195	NM_020824	ENSG00000107863	ARHGAP21	ARHGAP10	Rho GTPase activating protein 21	protein-coding	ARHGAP21
Yap_catlast-only89i_peak_19195	chr3	192606890	192607407	+	700	NA	intron (NM_178496, intron 1 of 1)	intron (NM_178496, intron 1 of 1)	28802	NM_178496	151963	Hs.151443	NM_178496	ENSG00000180611	MB21D2	C3orf59	Mab-21 domain containing 2	protein-coding	MB21D2
Yap_catlast-only89i_peak_12959	chr18	71983960	71984478	+	694	NA	intron (NM_001174123, intron 1 of 13)	intron (NM_001174123, intron 1 of 13)	1109	NM_001174123	644041	Hs.465414	NM_001174123	ENSG00000206043	C18orf63	DKFZP781G0119	chromosome 18 open reading frame 63	protein-coding	C18orf63
Yap_catlast-only89i_peak_16870	chr21	46432140	46432713	+	694	NA	Intergenic	MLT1D|LTR|ERVL-MaLR	-7784	NR_024089	378825	Hs.534828	NR_024089	ENSG00000275874	PICSAR	C21orf113|LINC00162|NCRNA00162|NLC1-C|NLC1C|PRED74	P38 inhibited cutaneous squamous cell carcinoma associated lincRNA	ncRNA
Yap_catlast-only89i_peak_9849	chr15	74715001	74715744	+	689	NA	intron (NM_001146029, intron 1 of 12)	intron (NM_001146029, intron 1 of 12)	10673	NM_001146030	8482	Hs.24640	NM_003612	ENSG00000138623	SEMA7A	CD108|CDw108|H-SEMA-K1|H-Sema-L|JMH|SEMAK1|SEMAL	semaphorin 7A (John Milton Hagen blood group)	protein-coding
Yap_catlast-only89i_peak_26904	chr8	126649578	126649982	+	683	NA	Intergenic	Intergenic	205329	NM_001282985	10221	Hs.444947	NM_025195	ENSG00000173334	TRIB1	C8FW|GIG-2|GIG2|SKIP1|TRB-1|TRB1	tribbles pseudokinase 1	protein-coding
Yap_catlast-only89i_peak_6830	chr12	54238603	54239235	+	679	NA	Intergenic	Intergenic	-88101	NR_104332	102216268	Hs.742074	NR_104332	ENSG00000260492	CISTR	CISTR-ACT|CISTRACT|re52431	chondrogenesis-associated transcript	ncRNA	CISTR
Yap_catlast-only89i_peak_4538	chr11	12695657	12696310	+	676	NA	promoter-TSS (NM_021961)	promoter-TSS (NM_021961)	14	NM_021961	7003	Hs.655331	NM_021961	ENSG00000187079	TEAD1	AA|NTEF-1|REF1|TCF-13|TCF13|TEAD-1|TEF-1	TEA domain transcription factor 1	protein-coding	TEAD1
Yap_catlast-only89i_peak_26113	chr8	40930579	40931118	+	673	NA	Intergenic	MER31-int|LTR|ERV1	-175505	NM_001135731	79698	Hs.591850	NM_024645	ENSG00000165061	ZMAT4	-	zinc finger matrin-type 4	protein-coding
Yap_catlast-only89i_peak_28853	chrX	112048183	112048338	+	672	NA	exon (NM_001113490, exon 5 of 11)	exon (NM_001113490, exon 5 of 11)	18094	NM_001113490	154796	Hs.528051	NM_133265	ENSG00000126016	AMOT	-	angiomotin	protein-coding
Yap_catlast-only89i_peak_2164	chr1	205858718	205859522	+	672	NA	intron (NR_046097, intron 1 of 2)	HERVH-int|LTR|ERV1	27913	NR_046097	284581		NR_046097		LOC284581	-	uncharacterized LOC284581	ncRNA	LOC284581
Yap_catlast-only89i_peak_25805	chr8	22454871	22455425	+	670	NA	3' UTR (NM_176871, exon 10 of 10)	3' UTR (NM_176871, exon 10 of 10)	-1966	NM_173686	541565	Hs.743508	NM_173686	ENSG00000241852	C8orf58	-	chromosome 8 open reading frame 58	protein-coding	C8orf58
Yap_catlast-only89i_peak_6435	chr12	18535997	18536561	+	669	NA	intron (NM_004570, intron 13 of 31)	intron (NM_004570, intron 13 of 31)	121805	NM_004570	5288	Hs.22500	NM_004570	ENSG00000139144	PIK3C2G	PI3K-C2-gamma|PI3K-C2GAMMA	phosphatidylinositol-4-phosphate 3-kinase catalytic subunit type 2 gamma	protein-coding	PIK3C2G
Yap_catlast-only89i_peak_11145	chr17	1391156	1391793	+	665	NA	intron (NM_001080779, intron 1 of 31)	CpG	-2423	NM_001080950	4641	Hs.286226	NM_033375	ENSG00000197879	MYO1C	MMI-beta|MMIb|NMI|myr2	myosin IC	protein-coding
Yap_catlast-only89i_peak_1394	chr1	98552232	98552712	+	665	NA	Intergenic	L2b|LINE|L2	-37223	NR_046105	400765	Hs.451802	NM_001001688	ENSG00000225206	MIR137HG	-	MIR137 host gene	ncRNA
Yap_catlast-only89i_peak_17059	chr22	27857248	27857780	+	659	NA	Intergenic	Intergenic	150902	NR_134581	100507657	Hs.537371	NR_134581	ENSG00000226741	LOC100507657	-	uncharacterized LOC100507657	ncRNA
Yap_catlast-only89i_peak_6358	chr12	12419814	12420410	+	656	NA	promoter-TSS (NM_002336)	promoter-TSS (NM_002336)	-301	NM_002336	4040	Hs.584775	NM_002336	ENSG00000070018	LRP6	ADCAD2|STHAG7	LDL receptor related protein 6	protein-coding	LRP6
Yap_catlast-only89i_peak_28159	chr9	127059549	127060175	+	656	NA	intron (NM_001166171, intron 2 of 10)	intron (NM_001166171, intron 2 of 10)	5163	NM_001166169	10783	Hs.197071	NM_014397	ENSG00000119408	NEK6	SID6-1512	NIMA related kinase 6	protein-coding
Yap_catlast-only89i_peak_17448	chr22	50731726	50732382	+	656	NA	intron (NM_012401, intron 2 of 36)	intron (NM_012401, intron 2 of 36)	13947	NM_012401	23654	Hs.3989	NM_012401	ENSG00000196576	PLXNB2	MM1|Nbla00445|PLEXB2|dJ402G11.3	plexin B2	protein-coding	PLXNB2
Yap_catlast-only89i_peak_4319	chr11	2554775	2555342	+	655	NA	intron (NM_000218, intron 2 of 15)	intron (NM_000218, intron 2 of 15)	72374	NM_181798	3784	Hs.95162	NM_000218	ENSG00000053918	KCNQ1	ATFB1|ATFB3|JLNS1|KCNA8|KCNA9|KVLQT1|Kv1.9|Kv7.1|LQT|LQT1|RWS|SQT2|WRS	potassium voltage-gated channel subfamily Q member 1	protein-coding
Yap_catlast-only89i_peak_16728	chr21	35917439	35918078	+	651	NA	intron (NM_004414, intron 1 of 3)	intron (NM_004414, intron 1 of 3)	-18450	NM_001331016	1827	Hs.282326	NM_004414	ENSG00000159200	RCAN1	ADAPT78|CSP1|DSC1|DSCR1|MCIP1|RCN1	regulator of calcineurin 1	protein-coding
Yap_catlast-only89i_peak_227	chr1	12696463	12696983	+	644	NA	Intergenic	Intergenic	-7843	NM_001013630	343066	Hs.209954	NM_001013630	ENSG00000204518	AADACL4	-	arylacetamide deacetylase like 4	protein-coding	AADACL4
Yap_catlast-only89i_peak_11954	chr17	48105643	48106185	+	642	NA	Intergenic	Intergenic	27189	NR_038230	284080	Hs.274864	NR_038230	ENSG00000246640	LOC284080	-	uncharacterized LOC284080	ncRNA	LOC284080
Yap_catlast-only89i_peak_21890	chr5	153339044	153339602	+	642	NA	Intergenic	Intergenic	79175	NM_001317995	10827	Hs.166551	NM_018691	ENSG00000055147	FAM114A2	133K02|C5orf3	family with sequence similarity 114 member A2	protein-coding
Yap_catlast-only89i_peak_5346	chr11	69451184	69451776	+	640	NA	Intergenic	CpG	-4393	NM_053056	595	Hs.523852	NM_053056	ENSG00000110092	CCND1	BCL1|D11S287E|PRAD1|U21B31	cyclin D1	protein-coding	CCND1
Yap_catlast-only89i_peak_6378	chr12	13023269	13023862	+	639	NA	Intergenic	MLT1H1|LTR|ERVL-MaLR	-4846	NR_003932	387841	Hs.631728	NR_003932	ENSG00000234498	RPL13AP20	RPL13A_9_1211	ribosomal protein L13a pseudogene 20	pseudo	RPL13AP20
Yap_catlast-only89i_peak_7061	chr12	68819720	68820300	+	634	NA	Intergenic	AluJo|SINE|Alu	25254	NR_120458	100507195	Hs.450772	NR_120458	ENSG00000251301	LOC100507195	-	uncharacterized LOC100507195	ncRNA	LOC100507195
Yap_catlast-only89i_peak_135	chr1	8963756	8964487	+	634	NA	Intergenic	Intergenic	-24970	NM_001428	2023	Hs.517145	NM_001428	ENSG00000074800	ENO1	ENO1L1|HEL-S-17|MPB1|NNE|PPH	enolase 1	protein-coding	ENO1
Yap_catlast-only89i_peak_8332	chr13	111100525	111101060	+	634	NA	intron (NM_001846, intron 18 of 47)	intron (NM_001846, intron 18 of 47)	14842	NM_001267044	100129836	Hs.640035	NM_001267044		COL4A2-AS2	-	COL4A2 antisense RNA 2	protein-coding
Yap_catlast-only89i_peak_2710	chr10	15242610	15243186	+	629	NA	Intergenic	Intergenic	-32189	NM_001308295	9397	Hs.60339	NM_004808	ENSG00000152465	NMT2	-	N-myristoyltransferase 2	protein-coding
Yap_catlast-only89i_peak_23677	chr6	132272151	132272929	+	629	NA	promoter-TSS (NM_001901)	promoter-TSS (NM_001901)	-22	NM_001901	1490	Hs.410037	NM_001901	ENSG00000118523	CTGF	CCN2|HCS24|IGFBP8|NOV2	connective tissue growth factor	protein-coding	CTGF
Yap_catlast-only89i_peak_19375	chr4	7807185	7807647	+	627	NA	intron (NM_001134647, intron 9 of 17)	L2b|LINE|L2	51599	NR_026892	84740	Hs.663029	NM_032654	ENSG00000272620	AFAP1-AS1	AFAP1-AS|AFAP1AS	AFAP1 antisense RNA 1	ncRNA
Yap_catlast-only89i_peak_28648	chrX	46186837	46187415	+	624	NA	promoter-TSS (NR_110388)	promoter-TSS (NR_110388)	-17	NR_110388	101927574	Hs.350952	NR_110388	ENSG00000236751	LINC01186	-	long intergenic non-protein coding RNA 1186	ncRNA	LINC01186
Yap_catlast-only89i_peak_20639	chr5	30279307	30279842	+	623	NA	Intergenic	Intergenic	398907	NR_134264	105374704	Hs.151157	NR_134264		LOC105374704	-	uncharacterized LOC105374704	ncRNA
Yap_catlast-only89i_peak_7400	chr12	106477680	106478214	+	618	NA	intron (NM_014840, intron 3 of 6)	intron (NM_014840, intron 3 of 6)	55864	NM_014840	9891	Hs.524692	NM_014840	ENSG00000074590	NUAK1	ARK5	NUAK family kinase 1	protein-coding	NUAK1
Yap_catlast-only89i_peak_12039	chr17	57232238	57232872	+	614	NA	promoter-TSS (NM_018304)	promoter-TSS (NM_018304)	245	NM_001330399	348235	Hs.463607	NM_182620	ENSG00000182628	SKA2	FAM33A	spindle and kinetochore associated complex subunit 2	protein-coding
Yap_catlast-only89i_peak_14171	chr2	28819496	28820002	+	612	NA	intron (NR_138141, intron 13 of 35)	intron (NR_138141, intron 13 of 35)	30525	NR_138141	151056	Hs.444933	NM_153021	ENSG00000163803	PLB1	PLB|PLB/LIP	phospholipase B1	protein-coding
Yap_catlast-only89i_peak_27831	chr9	101553375	101553867	+	612	NA	intron (NM_173551, intron 1 of 14)	intron (NM_173551, intron 1 of 14)	5203	NM_173551	203286	Hs.406890	NM_173551	ENSG00000165138	ANKS6	ANKRD14|NPHP16|PKDR1|SAMD6	ankyrin repeat and sterile alpha motif domain containing 6	protein-coding	ANKS6
Yap_catlast-only89i_peak_1251	chr1	86072733	86073439	+	609	NA	Intergenic	Intergenic	26642	NM_001554	3491	Hs.8867	NM_001554	ENSG00000142871	CYR61	CCN1|GIG1|IGFBP10	cysteine rich angiogenic inducer 61	protein-coding	CYR61
Yap_catlast-only89i_peak_6123	chr11	130547251	130547826	+	602	NA	intron (NM_001271983, intron 1 of 2)	intron (NM_001271983, intron 1 of 2)	4687	NM_001271983	283171	Hs.376151	NM_001271983		C11orf44	-	chromosome 11 open reading frame 44	protein-coding	C11orf44
Yap_catlast-only89i_peak_5594	chr11	86458197	86458742	+	598	NA	Intergenic	Intergenic	-43632	NM_001293180	11098	Hs.25338	NM_007173	ENSG00000150687	PRSS23	SIG13|SPUVE|ZSIG13	protease, serine 23	protein-coding
Yap_catlast-only89i_peak_24018	chr7	2861347	2861863	+	595	NA	intron (NM_007353, intron 1 of 3)	L2b|LINE|L2	-6712	NM_001282441	2768	Hs.487341	NM_007353	ENSG00000146535	GNA12	NNX3|RMP|gep	G protein subunit alpha 12	protein-coding
Yap_catlast-only89i_peak_8151	chr13	75933414	75933877	+	594	NA	intron (NM_014832, intron 3 of 20)	intron (NM_014832, intron 3 of 20)	118921	NR_132375	106144536	Hs.591226	NR_132375		LINC01078	-	long intergenic non-protein coding RNA 1078	ncRNA
Yap_catlast-only89i_peak_11898	chr17	45382829	45383372	+	588	NA	intron (NR_110880, intron 2 of 2)	intron (NR_110880, intron 2 of 2)	17879	NR_110881	102724508	Hs.661005	NR_110880	ENSG00000263293	THCAT158	-	thyroid cancer-associated transcript 158	ncRNA
Yap_catlast-only89i_peak_22659	chr6	30663040	30663454	+	588	NA	Intergenic	AluJb|SINE|Alu	-4050	NM_007243	11270	Hs.519993	NM_007243	ENSG00000137404	NRM	NRM29	nurim (nuclear envelope membrane protein)	protein-coding	NRM
Yap_catlast-only89i_peak_23408	chr6	106056436	106057203	+	588	NA	Intergenic	Intergenic	-205820	NM_002726	5550	Hs.436564	NM_002726	ENSG00000085377	PREP	PE|PEP	prolyl endopeptidase	protein-coding	PREP
Yap_catlast-only89i_peak_27784	chr9	97684318	97685050	+	587	NA	intron (NM_032823, intron 5 of 14)	intron (NM_032823, intron 5 of 14)	112440	NR_031755	100313780		NR_031755	ENSG00000252153	MIR2278	mir-2278	microRNA 2278	ncRNA	MIR2278
Yap_catlast-only89i_peak_18342	chr3	112365922	112366571	+	585	NA	Intergenic	L2a|LINE|L2	-6256	NM_199511	151887	Hs.477128	NM_199511	ENSG00000091986	CCDC80	DRO1|SSG1|URB|okuribin	coiled-coil domain containing 80	protein-coding	CCDC80
Yap_catlast-only89i_peak_23432	chr6	107039158	107039809	+	583	NA	intron (NM_001318746, intron 6 of 8)	intron (NM_001318746, intron 6 of 8)	37890	NM_032730	84816	Hs.155839	NM_032730	ENSG00000130347	RTN4IP1	NIMP|OPA10	reticulon 4 interacting protein 1	protein-coding	RTN4IP1
Yap_catlast-only89i_peak_26597	chr8	101679660	101680278	+	578	NA	Intergenic	Charlie20a|DNA|hAT-Charlie	-18076	NM_152628	169166	Hs.567758	NM_152628	ENSG00000174226	SNX31	-	sorting nexin 31	protein-coding	SNX31
Yap_catlast-only89i_peak_53	chr1	3459780	3460442	+	577	NA	intron (NM_001409, intron 4 of 36)	CpG	17243	NR_030277	693135		NR_030277	ENSG00000207776	MIR551A	MIRN551A|mir-551a	microRNA 551a	ncRNA	MIR551A
Yap_catlast-only89i_peak_14360	chr2	46294732	46295341	+	577	NA	intron (NM_005400, intron 10 of 14)	intron (NM_005400, intron 10 of 14)	-229505	NM_001430	2034	Hs.468410	NM_001430	ENSG00000116016	EPAS1	ECYT4|HIF2A|HLF|MOP2|PASD2|bHLHe73	endothelial PAS domain protein 1	protein-coding	EPAS1
Yap_catlast-only89i_peak_25291	chr7	127416761	127417283	+	576	NA	intron (NM_014390, intron 10 of 23)	intron (NM_014390, intron 10 of 23)	124979	NM_014390	27044	Hs.122523	NM_014390	ENSG00000197157	SND1	TDRD11|Tudor-SN|p100	staphylococcal nuclease and tudor domain containing 1	protein-coding	SND1
Yap_catlast-only89i_peak_5912	chr11	118781038	118781613	+	571	NA	promoter-TSS (NR_039713)	promoter-TSS (NR_039713)	-92	NR_039713	100616376		NR_039713	ENSG00000264211	MIR4492	mir-4492	microRNA 4492	ncRNA	MIR4492
Yap_catlast-only89i_peak_8511	chr14	35120105	35120584	+	570	NA	Intergenic	MLT1D|LTR|ERVL-MaLR	-20978	NM_152233	58533	Hs.276523	NM_021249	ENSG00000129515	SNX6	MSTP010|TFAF2	sorting nexin 6	protein-coding
Yap_catlast-only89i_peak_14527	chr2	70016348	70016775	+	566	NA	intron (NM_001320698, intron 5 of 14)	intron (NM_001320698, intron 5 of 14)	-40177	NM_178439	64395	Hs.293971	NM_178439	ENSG00000087338	GMCL1	BTBD13|GCL|GCL1|SPATA29	germ cell-less, spermatogenesis associated 1	protein-coding	GMCL1
Yap_catlast-only89i_peak_24919	chr7	92956266	92956755	+	566	NA	intron (NM_001257998, intron 22 of 28)	MER3|DNA|hAT-Charlie	94857	NM_017667	55610	Hs.202424	NM_017667	ENSG00000004766	VPS50	CCDC132|VPS54L	VPS50, EARP/GARPII complex subunit	protein-coding	VPS50
Yap_catlast-only89i_peak_5873	chr11	114237425	114238049	+	566	NA	intron (NR_120567, intron 2 of 2)	intron (NR_120567, intron 2 of 2)	13024	NR_120567	101928940	Hs.409846	NR_120567	ENSG00000256195	LOC101928940	-	uncharacterized LOC101928940	ncRNA	LOC101928940
Yap_catlast-only89i_peak_16034	chr20	30943670	30944251	+	566	NA	Intergenic	MLT1E2|LTR|ERVL-MaLR	-2187	NM_001164603	171023	Hs.374043	NM_015338	ENSG00000171456	ASXL1	BOPS|MDS	additional sex combs like 1, transcriptional regulator	protein-coding
Yap_catlast-only89i_peak_1830	chr1	165867848	165868455	+	565	NA	intron (NM_012474, intron 4 of 6)	intron (NM_012474, intron 4 of 6)	-9007	NR_037431	100500832		NR_037431	ENSG00000143179	MIR3658	-	microRNA 3658	ncRNA	MIR3658
Yap_catlast-only89i_peak_9002	chr14	75038342	75039144	+	565	NA	intron (NM_000428, intron 3 of 35)	intron (NM_000428, intron 3 of 35)	40291	NM_000428	4053	Hs.512776	NM_000428	ENSG00000119681	LTBP2	C14orf141|GLC3D|LTBP3|MSPKA|MSTP031|WMS3	latent transforming growth factor beta binding protein 2	protein-coding	LTBP2
Yap_catlast-only89i_peak_14258	chr2	37995460	37996131	+	565	NA	Intergenic	Intergenic	61059	NR_110011	101929559	Hs.468200	NR_110011	ENSG00000237803	LINC00211	NCRNA00211	long intergenic non-protein coding RNA 211	ncRNA	LINC00211
Yap_catlast-only89i_peak_12679	chr18	26745144	26745700	+	560	NA	Intergenic	Intergenic	-988012	NM_001792	1000	Hs.464829	NM_001792	ENSG00000170558	CDH2	CD325|CDHN|CDw325|NCAD	cadherin 2	protein-coding	CDH2
Yap_catlast-only89i_peak_28007	chr9	116383782	116384171	+	560	NA	Intergenic	Intergenic	27542	NM_001276262	5998	Hs.494875	NM_017790	ENSG00000138835	RGS3	C2PA|RGP3	regulator of G-protein signaling 3	protein-coding
Yap_catlast-only89i_peak_21942	chr5	158458528	158458965	+	560	NA	intron (NM_182708, intron 5 of 14)	intron (NM_182708, intron 5 of 14)	68024	NM_001324101	1879	Hs.573143	NM_024007	ENSG00000164330	EBF1	COE1|EBF|O/E-1|OLF1	early B-cell factor 1	protein-coding
Yap_catlast-only89i_peak_26498	chr8	96417641	96418125	+	559	NA	intron (NR_038209, intron 2 of 3)	intron (NR_038209, intron 2 of 3)	-136421	NM_177965	157657	Hs.548157	NM_177965	ENSG00000156172	C8orf37	BBS21|CORD16|RP64|smalltalk	chromosome 8 open reading frame 37	protein-coding	C8orf37
Yap_catlast-only89i_peak_25190	chr7	115816990	115817351	+	557	NA	Intergenic	Intergenic	-33377	NM_015641	26136	Hs.592286	NM_015641	ENSG00000135269	TES	TESS|TESS-2	testin LIM domain protein	protein-coding	TES
Yap_catlast-only89i_peak_21	chr1	1295807	1296465	+	555	NA	intron (NM_001282582, intron 1 of 10)	intron (NM_001282582, intron 1 of 10)	1021	NM_001282583	54587	Hs.515687	NM_032348	ENSG00000162576	MXRA8	-	matrix remodeling associated 8	protein-coding
Yap_catlast-only89i_peak_8899	chr14	69408543	69409078	+	555	NA	intron (NM_001130005, intron 1 of 20)	intron (NM_001130005, intron 1 of 20)	37273	NM_001130004	87	Hs.235750	NM_001102	ENSG00000072110	ACTN1	BDPLT15	actinin alpha 1	protein-coding
Yap_catlast-only89i_peak_11292	chr17	7254731	7255441	+	554	NA	promoter-TSS (NM_001002914)	promoter-TSS (NM_001002914)	-122	NM_001002914	147040	Hs.592112	NM_001002914	ENSG00000213859	KCTD11	C17orf36|KCASH1|REN|REN/KCTD11	potassium channel tetramerization domain containing 11	protein-coding	KCTD11
Yap_catlast-only89i_peak_5324	chr11	68898931	68899425	+	554	NA	Intergenic	Intergenic	39852	NR_104161	338694	Hs.564235	NR_104161	ENSG00000261070	LOC338694	-	uncharacterized LOC338694	ncRNA	LOC338694
Yap_catlast-only89i_peak_20359	chr4	184019807	184020599	+	553	NA	promoter-TSS (NM_024949)	promoter-TSS (NM_024949)	149	NR_024008	152641	Hs.745108	NM_153008	ENSG00000251359	WWC2-AS2	C4orf38	WWC2 antisense RNA 2	ncRNA
Yap_catlast-only89i_peak_5695	chr11	96058119	96058508	+	548	NA	intron (NM_032427, intron 1 of 4)	intron (NM_032427, intron 1 of 4)	-16289	NR_036125	100422991		NR_036125	ENSG00000266192	MIR1260B	mir-1260b	microRNA 1260b	ncRNA	MIR1260B
Yap_catlast-only89i_peak_6663	chr12	47358214	47358672	+	544	NA	Intergenic	Intergenic	-114943	NM_001281429	91523	Hs.560100	NM_138371	ENSG00000179715	PCED1B	FAM113B	PC-esterase domain containing 1B	protein-coding
Yap_catlast-only89i_peak_16250	chr20	42567974	42568478	+	543	NA	intron (NM_001098796, intron 1 of 8)	intron (NM_001098796, intron 1 of 8)	-6310	NM_001098798	84969	Hs.26608	NM_032883	ENSG00000124191	TOX2	C20orf100|GCX-1|GCX1|dJ1108D11.2|dJ495O3.1	TOX high mobility group box family member 2	protein-coding
Yap_catlast-only89i_peak_22460	chr6	14035495	14036116	+	542	NA	Intergenic	MLT1J2|LTR|ERVL-MaLR	-81682	NM_001251901	9308	Hs.595133	NM_004233	ENSG00000112149	CD83	BL11|HB15	CD83 molecule	protein-coding
Yap_catlast-only89i_peak_8656	chr14	53477636	53478112	+	542	NA	Intergenic	Intergenic	-60059	NM_006832	10979	Hs.509343	NM_006832	ENSG00000073712	FERMT2	KIND2|MIG2|PLEKHC1|UNC112|UNC112B|mig-2	fermitin family member 2	protein-coding	FERMT2
Yap_catlast-only89i_peak_18575	chr3	134076571	134077111	+	542	NA	intron (NM_001278685, intron 9 of 9)	intron (NM_001278685, intron 9 of 9)	9863	NR_106885	102466744		NR_106885	ENSG00000277723	MIR6827	hsa-mir-6827	microRNA 6827	ncRNA	MIR6827
Yap_catlast-only89i_peak_12984	chr19	782382	782897	+	541	NA	Intergenic	Intergenic	-14753	NM_031991	5725	Hs.172550	NM_002819	ENSG00000011304	PTBP1	HNRNP-I|HNRNPI|HNRPI|PTB|PTB-1|PTB-T|PTB2|PTB3|PTB4|pPTB	polypyrimidine tract binding protein 1	protein-coding
Yap_catlast-only89i_peak_22122	chr5	173251167	173251689	+	541	NA	Intergenic	Intergenic	-33483	NR_108028	101928154	Hs.366725	NR_108028		LINC01485	-	long intergenic non-protein coding RNA 1485	ncRNA	LINC01485
Yap_catlast-only89i_peak_16435	chr20	49157355	49157989	+	539	NA	intron (NM_001278618, intron 1 of 8)	intron (NM_001278618, intron 1 of 8)	30814	NM_001278618	5770	Hs.417549	NM_002827	ENSG00000196396	PTPN1	PTP1B	protein tyrosine phosphatase, non-receptor type 1	protein-coding
Yap_catlast-only89i_peak_431	chr1	23523372	23523911	+	538	NA	Intergenic	Intergenic	-2419	NM_000864	3352	Hs.121482	NM_000864	ENSG00000179546	HTR1D	5-HT1D|HT1DA|HTR1DA|HTRL|RDC4	5-hydroxytryptamine receptor 1D	protein-coding	HTR1D
Yap_catlast-only89i_peak_27664	chr9	84174683	84175122	+	538	NA	Intergenic	Intergenic	129548	NM_001303104	7088	Hs.197320	NM_005077	ENSG00000196781	TLE1	ESG|ESG1|GRG1	transducin like enhancer of split 1	protein-coding
Yap_catlast-only89i_peak_1037	chr1	59608847	59609291	+	537	NA	intron (NR_027120, intron 1 of 2)	L2c|LINE|L2	3410	NR_027120	729467	Hs.662291	NR_027120	ENSG00000224609	HSD52	-	uncharacterized LOC729467	ncRNA	HSD52
Yap_catlast-only89i_peak_26235	chr8	54857387	54858010	+	533	NA	intron (NM_003702, intron 2 of 4)	L1MB7|LINE|L1	64266	NM_003702	8601	Hs.368733	NM_003702	ENSG00000147509	RGS20	RGSZ1|ZGAP1|g(z)GAP|gz-GAP	regulator of G-protein signaling 20	protein-coding	RGS20
Yap_catlast-only89i_peak_16298	chr20	43966311	43966851	+	532	NA	intron (NM_002999, intron 1 of 4)	intron (NM_002999, intron 1 of 4)	10483	NM_002999	6385	Hs.632267	NM_002999	ENSG00000124145	SDC4	SYND4	syndecan 4	protein-coding	SDC4
Yap_catlast-only89i_peak_10746	chr16	70727871	70728411	+	532	NA	intron (NM_018052, intron 17 of 18)	intron (NM_018052, intron 17 of 18)	-8187	NM_138383	92154	Hs.432387	NM_138383	ENSG00000132613	MTSS1L	ABBA|ABBA-1|ABBA1	MTSS1L, I-BAR domain containing	protein-coding	MTSS1L
Yap_catlast-only89i_peak_282	chr1	16500001	16500495	+	530	NA	Intergenic	Intergenic	-17644	NM_004431	1969	Hs.171596	NM_004431	ENSG00000142627	EPHA2	ARCC2|CTPA|CTPP1|CTRCT6|ECK	EPH receptor A2	protein-coding	EPHA2
Yap_catlast-only89i_peak_12311	chr17	76348935	76349497	+	530	NA	Intergenic	CpG	6944	NM_003955	9021	Hs.527973	NM_003955	ENSG00000184557	SOCS3	ATOD4|CIS3|Cish3|SOCS-3|SSI-3|SSI3	suppressor of cytokine signaling 3	protein-coding	SOCS3
Yap_catlast-only89i_peak_13225	chr19	10962794	10963295	+	529	NA	intron (NM_001136482, intron 2 of 6)	intron (NM_001136482, intron 2 of 6)	3938	NM_001136482	255809	Hs.440535	NM_001136482	ENSG00000214212	C19orf38	HIDE1	chromosome 19 open reading frame 38	protein-coding	C19orf38
Yap_catlast-only89i_peak_17281	chr22	39570703	39571298	+	529	NA	Intergenic	Intergenic	-22345	NM_001346743	23492	Hs.356416	NM_175709	ENSG00000100307	CBX7	-	chromobox 7	protein-coding
Yap_catlast-only89i_peak_27467	chr9	35727921	35728436	+	529	NA	intron (NM_006289, intron 1 of 56)	intron (NM_006289, intron 1 of 56)	-4139	NM_006368	10488	Hs.522110	NM_006368	ENSG00000107175	CREB3	LUMAN|LZIP|sLZIP	cAMP responsive element binding protein 3	protein-coding	CREB3
Yap_catlast-only89i_peak_16	chr1	1200203	1200947	+	528	NA	intron (NM_194315, intron 2 of 7)	intron (NM_194315, intron 2 of 7)	8659	NM_058167	118424	Hs.191987	NM_058167	ENSG00000160087	UBE2J2	NCUBE-2|NCUBE2|PRO2121	ubiquitin conjugating enzyme E2 J2	protein-coding	UBE2J2
Yap_catlast-only89i_peak_25076	chr7	102516150	102516595	+	527	NA	intron (NM_001111038, intron 16 of 18)	LTR33A_|LTR|ERVL	-36972	NM_005824	10234	Hs.567412	NM_005824	ENSG00000128606	LRRC17	P37NB	leucine rich repeat containing 17	protein-coding	LRRC17
Yap_catlast-only89i_peak_5409	chr11	72968249	72968911	+	527	NA	Intergenic	Intergenic	-6970	NM_001277205	5031	Hs.16362	NM_004154	ENSG00000171631	P2RY6	P2Y6	pyrimidinergic receptor P2Y6	protein-coding
Yap_catlast-only89i_peak_12941	chr18	66467275	66467731	+	526	NA	intron (NM_024781, intron 1 of 7)	intron (NM_024781, intron 1 of 7)	2186	NM_024781	79839	Hs.280781	NM_024781	ENSG00000150636	CCDC102B	ACY1L|AN|C18orf14|HsT1731	coiled-coil domain containing 102B	protein-coding	CCDC102B
Yap_catlast-only89i_peak_9733	chr15	67336677	67337099	+	526	NA	intron (NR_135686, intron 2 of 5)	intron (NR_135686, intron 2 of 5)	19632	NR_135686	102723493	Hs.419760	NR_135686		LOC102723493	-	uncharacterized LOC102723493	ncRNA
Yap_catlast-only89i_peak_11609	chr17	29596703	29597169	+	525	NA	intron (NM_001042492, intron 36 of 57)	MLT1K|LTR|ERVL-MaLR	27444	NM_002544	4974	Hs.113874	NM_002544	ENSG00000126861	OMG	OMGP	oligodendrocyte myelin glycoprotein	protein-coding	OMG
Yap_catlast-only89i_peak_3744	chr10	96989233	96989748	+	521	NA	TTS (NM_207321)	TTS (NM_207321)	35533	NM_207321	142827	Hs.134229	NM_207321	ENSG00000173124	ACSM6	C10orf129|bA310E22.3	acyl-CoA synthetase medium-chain family member 6	protein-coding	ACSM6
Yap_catlast-only89i_peak_17721	chr3	29735257	29735804	+	519	NA	intron (NM_001003793, intron 4 of 14)	intron (NM_001003793, intron 4 of 14)	240117	NR_046556	100873977	Hs.581453	NR_046556	ENSG00000235593	RBMS3-AS1	-	RBMS3 antisense RNA 1	ncRNA	RBMS3-AS1
Yap_catlast-only89i_peak_26603	chr8	101801153	101801637	+	519	NA	Intergenic	L2c|LINE|L2	-67080	NM_002568	26986	Hs.387804	NM_002568	ENSG00000070756	PABPC1	PAB1|PABP|PABP1|PABPC2|PABPL1	poly(A) binding protein cytoplasmic 1	protein-coding	PABPC1
Yap_catlast-only89i_peak_10867	chr16	81439228	81439857	+	519	NA	Intergenic	Intergenic	20919	NR_039871	100616150		NR_039871	ENSG00000261609	MIR4720	-	microRNA 4720	ncRNA	MIR4720
Yap_catlast-only89i_peak_8185	chr13	91097423	91097879	+	519	NA	Intergenic	MLT2D|LTR|ERVL	-47891	NR_120414	101927224	Hs.385801	NR_120414		LINC01049	-	long intergenic non-protein coding RNA 1049	ncRNA	LINC01049
Yap_catlast-only89i_peak_9672	chr15	63399953	63400711	+	519	NA	Intergenic	Intergenic	-13667	NM_032857	114294	Hs.410388	NM_032857	ENSG00000103642	LACTB	G24|MRPL56	lactamase beta	protein-coding	LACTB
Yap_catlast-only89i_peak_9728	chr15	67175562	67176169	+	519	NA	Intergenic	Intergenic	72988	NR_135687	102723481	Hs.512978	NR_135687	ENSG00000259289	LOC102723481	-	uncharacterized LOC102723481	ncRNA
Yap_catlast-only89i_peak_8787	chr14	62222180	62222471	+	518	NA	Intergenic	L1ME3F|LINE|L1	-4510	NR_144368	105370526	Hs.661638	NR_144368		LOC105370526	-	uncharacterized LOC105370526	ncRNA
Yap_catlast-only89i_peak_3385	chr10	74523849	74524415	+	518	NA	intron (NR_073062, intron 3 of 9)	intron (NR_073062, intron 3 of 9)	43345	NR_039823	100616286		NR_039823	ENSG00000266719	MIR4676	-	microRNA 4676	ncRNA	MIR4676
Yap_catlast-only89i_peak_28854	chrX	112054484	112054619	+	517	NA	exon (NM_001113490, exon 3 of 11)	exon (NM_001113490, exon 3 of 11)	11803	NM_001113490	154796	Hs.528051	NM_133265	ENSG00000126016	AMOT	-	angiomotin	protein-coding
Yap_catlast-only89i_peak_8143	chr13	74780384	74780853	+	516	NA	Intergenic	Intergenic	-24963	NR_144451	100507612	Hs.447508	NR_144451		LINC00402	-	long intergenic non-protein coding RNA 402	ncRNA
Yap_catlast-only89i_peak_3463	chr10	78343269	78343869	+	516	NA	Intergenic	HAL1b|LINE|L1	-304233	NR_120655	101929328	Hs.664552	NR_120655	ENSG00000236467	KCNMA1-AS1	-	KCNMA1 antisense RNA 1	ncRNA	KCNMA1-AS1
Yap_catlast-only89i_peak_12302	chr17	76183064	76183482	+	516	NA	promoter-TSS (NM_003258)	promoter-TSS (NM_003258)	12	NM_003258	7083	Hs.515122	NM_003258	ENSG00000167900	TK1	TK2	thymidine kinase 1	protein-coding	TK1
Yap_catlast-only89i_peak_6208	chr12	2378091	2378536	+	510	NA	promoter-TSS (NR_046769)	promoter-TSS (NR_046769)	-629	NR_046769	100874370	Hs.653548	NR_046769		CACNA1C-IT3	-	CACNA1C intronic transcript 3	ncRNA	CACNA1C-IT3
Yap_catlast-only89i_peak_5326	chr11	69020508	69020945	+	510	NA	Intergenic	MLT1J2|LTR|ERVL-MaLR	-40879	NM_001300923	26579	Hs.523848	NM_138768	ENSG00000172927	MYEOV	OCIM	myeloma overexpressed	protein-coding
Yap_catlast-only89i_peak_2624	chr10	10913836	10914306	+	510	NA	intron (NM_001326323, intron 3 of 17)	intron (NM_001326323, intron 3 of 17)	73397	NM_001326327	10659	Hs.309288	NM_006561	ENSG00000048740	CELF2	BRUNOL3|CELF-2|CUG-BP2|CUGBP2|ETR-3|ETR3|NAPOR	CUGBP, Elav-like family member 2	protein-coding
Yap_catlast-only89i_peak_13602	chr19	41731565	41732320	+	509	NA	promoter-TSS (NM_001278599)	promoter-TSS (NM_001278599)	-718	NM_001278599	558	Hs.590970	NM_001699	ENSG00000167601	AXL	ARK|JTK11|Tyro7|UFO	AXL receptor tyrosine kinase	protein-coding
Yap_catlast-only89i_peak_14392	chr2	47261254	47261787	+	507	NA	intron (NM_020458, intron 15 of 19)	intron (NM_020458, intron 15 of 19)	-92526	NM_001171511	90411	Hs.662152	NM_139279	ENSG00000180398	MCFD2	F5F8D|F5F8D2|LMAN1IP|SDNSF	multiple coagulation factor deficiency 2	protein-coding
Yap_catlast-only89i_peak_14500	chr2	67616349	67616969	+	507	NA	Intergenic	Intergenic	-7783	NM_019002	54465	Hs.353022	NM_019002	ENSG00000143971	ETAA1	ETAA16	Ewing tumor associated antigen 1	protein-coding	ETAA1
Yap_catlast-only89i_peak_9719	chr15	67066627	67067141	+	507	NA	intron (NR_027654, intron 4 of 4)	intron (NR_027654, intron 4 of 4)	72210	NR_027654	4091	Hs.153863	NM_005585	ENSG00000137834	SMAD6	AOVD2|HsT17432|MADH6|MADH7	SMAD family member 6	protein-coding
Yap_catlast-only89i_peak_26850	chr8	124408624	124409159	+	505	NA	promoter-TSS (NM_014109)	promoter-TSS (NM_014109)	-186	NM_014109	29028	Hs.370834	NM_014109	ENSG00000156802	ATAD2	ANCCA|CT137|PRO2000	ATPase family, AAA domain containing 2	protein-coding	ATAD2
Yap_catlast-only89i_peak_1326	chr1	94201211	94201738	+	502	NA	intron (NM_001261408, intron 2 of 13)	intron (NM_001261408, intron 2 of 13)	-54080	NM_003567	8412	Hs.36958	NM_003567	ENSG00000137936	BCAR3	NSP2|SH2D3B	breast cancer anti-estrogen resistance 3	protein-coding	BCAR3
Yap_catlast-only89i_peak_6128	chr11	130642463	130642841	+	502	NA	Intergenic	Intergenic	89353	NR_125383	100507431	Hs.375101	NR_125383		LOC100507431	-	uncharacterized LOC100507431	ncRNA	LOC100507431
Yap_catlast-only89i_peak_24806	chr7	76050345	76050891	+	501	NA	intron (NM_007155, intron 1 of 8)	AluJo|SINE|Alu	-3654	NM_001110354	7784	Hs.656137	NM_007155	ENSG00000188372	ZP3	ZP3A|ZP3B|ZPC|Zp-3	zona pellucida glycoprotein 3	protein-coding
Yap_catlast-only89i_peak_1680	chr1	151519413	151519915	+	500	NA	intron (NM_001126337, intron 1 of 11)	intron (NM_001126337, intron 1 of 11)	1392	NR_030280	693139		NR_030280	ENSG00000207606	MIR554	MIRN554|hsa-mir-554	microRNA 554	ncRNA	MIR554
Yap_catlast-only89i_peak_28849	chrX	112024120	112024350	+	500	NA	promoter-TSS (NR_036255)	promoter-TSS (NR_036255)	-219	NR_036255	100423009		NR_036255	ENSG00000126016	MIR4329	-	microRNA 4329	ncRNA	MIR4329
Yap_catlast-only89i_peak_8565	chr14	44673127	44673774	+	500	NA	Intergenic	MER5B|DNA|hAT-Charlie	303049	NM_032135	84075	Hs.307086	NM_032135	ENSG00000189139	FSCB	C14orf155	fibrous sheath CABYR binding protein	protein-coding	FSCB
Yap_catlast-only89i_peak_25862	chr8	23608668	23609271	+	497	NA	Intergenic	Intergenic	-44858	NM_001136271	137814	Hs.532654	NM_001136271	ENSG00000180053	NKX2-6	CSX2|CTHM|NKX2F|NKX4-2	NK2 homeobox 6	protein-coding	NKX2-6
Yap_catlast-only89i_peak_7108	chr12	75728069	75728490	+	497	NA	promoter-TSS (NM_001304964)	promoter-TSS (NM_001304964)	-140	NM_152779	256710	Hs.567788	NM_152779	ENSG00000173401	GLIPR1L1	ALKN2972|PRO7434	GLI pathogenesis related 1 like 1	protein-coding	GLIPR1L1
Yap_catlast-only89i_peak_20974	chr5	57133429	57134006	+	497	NA	Intergenic	Intergenic	61272	NR_109900	101928539	Hs.639385	NR_109900	ENSG00000249584	LOC101928539	-	uncharacterized LOC101928539	ncRNA	LOC101928539
Yap_catlast-only89i_peak_18577	chr3	134082675	134083338	+	496	NA	intron (NM_001278685, intron 5 of 9)	CpG	3698	NR_106885	102466744		NR_106885	ENSG00000277723	MIR6827	hsa-mir-6827	microRNA 6827	ncRNA	MIR6827
Yap_catlast-only89i_peak_6703	chr12	49616352	49616820	+	496	NA	Intergenic	Intergenic	-5123	NM_001303117	84790	Hs.652390	NM_032704	ENSG00000167553	TUBA1C	TUBA6|bcm948	tubulin alpha 1c	protein-coding
Yap_catlast-only89i_peak_28852	chrX	112035070	112035228	+	496	NA	exon (NM_001113490, exon 6 of 11)	exon (NM_001113490, exon 6 of 11)	-11133	NR_036255	100423009		NR_036255	ENSG00000126016	MIR4329	-	microRNA 4329	ncRNA	MIR4329
Yap_catlast-only89i_peak_6946	chr12	58240344	58241251	+	496	NA	promoter-TSS (NM_005730)	promoter-TSS (NM_005730)	-50	NM_005730	10106	Hs.524530	NM_005730	ENSG00000175215	CTDSP2	OS4|PSR2|SCP2	CTD small phosphatase 2	protein-coding	CTDSP2
Yap_catlast-only89i_peak_9469	chr15	42236470	42237166	+	492	NA	intron (NM_139265, intron 2 of 5)	MIRc|SINE|MIR	23203	NR_120332	101928363	Hs.680195	NR_120332		EHD4-AS1	-	EHD4 antisense RNA 1	ncRNA	EHD4-AS1
Yap_catlast-only89i_peak_21835	chr5	149849125	149849806	+	490	NA	Intergenic	MER33|DNA|hAT-Charlie	16090	NR_105061	102546298	Hs.570892	NR_105061	ENSG00000254333	NDST1-AS1	-	NDST1 antisense RNA 1	ncRNA
Yap_catlast-only89i_peak_8610	chr14	51835277	51835820	+	489	NA	Intergenic	Intergenic	35437	NR_038358	283553	Hs.325752	NR_038358	ENSG00000258479	LINC00640	-	long intergenic non-protein coding RNA 640	ncRNA	LINC00640
Yap_catlast-only89i_peak_6206	chr12	2374043	2374941	+	489	NA	intron (NM_001129830, intron 3 of 47)	intron (NM_001129830, intron 3 of 47)	-4450	NR_046769	100874370	Hs.653548	NR_046769		CACNA1C-IT3	-	CACNA1C intronic transcript 3	ncRNA	CACNA1C-IT3
Yap_catlast-only89i_peak_1235	chr1	85794460	85795060	+	489	NA	intron (NM_001330655, intron 4 of 5)	intron (NM_001330655, intron 4 of 5)	-52173	NM_001320715	8915	Hs.193516	NM_003921	ENSG00000142867	BCL10	CARMEN|CIPER|CLAP|IMD37|c-E10|mE10	B-cell CLL/lymphoma 10	protein-coding
Yap_catlast-only89i_peak_2555	chr10	179419	179810	+	489	NA	promoter-TSS (NM_001202465)	promoter-TSS (NM_001202465)	-791	NM_006624	10771	Hs.292265	NM_006624	ENSG00000015171	ZMYND11	BRAM1|BS69|MRD30	zinc finger MYND-type containing 11	protein-coding	ZMYND11
Yap_catlast-only89i_peak_24236	chr7	22600850	22601439	+	488	NA	Intergenic	Intergenic	-1812	NR_038393	100506178	Hs.668122	NR_038393	ENSG00000232759	LOC100506178	-	uncharacterized LOC100506178	ncRNA	LOC100506178
Yap_catlast-only89i_peak_23256	chr6	77743770	77744264	+	487	NA	Intergenic	LTR16C|LTR|ERVL	429722	NM_000863	3351	Hs.123016	NM_000863	ENSG00000135312	HTR1B	5-HT-1B|5-HT-1D-beta|5-HT1B|5-HT1DB|HTR1D2|HTR1DB|S12	5-hydroxytryptamine receptor 1B	protein-coding	HTR1B
Yap_catlast-only89i_peak_24309	chr7	28080982	28081754	+	487	NA	intron (NM_175061, intron 1 of 4)	intron (NM_175061, intron 1 of 4)	-138708	NR_034097	100128081	Hs.434307	NR_034097		JAZF1-AS1	-	JAZF1 antisense RNA 1	ncRNA	JAZF1-AS1
Yap_catlast-only89i_peak_19287	chr3	197216887	197217418	+	487	NA	Intergenic	Intergenic	65706	NM_203314	622	Hs.274539	NM_004051	ENSG00000161267	BDH1	BDH|SDR9C1	3-hydroxybutyrate dehydrogenase 1	protein-coding
Yap_catlast-only89i_peak_18434	chr3	124493100	124493564	+	487	NA	intron (NM_002213, intron 10 of 14)	MLT1D|LTR|ERVL-MaLR	42046	NR_036088	100422864		NR_036088	ENSG00000265981	MIR544B	-	microRNA 544b	ncRNA	MIR544B
Yap_catlast-only89i_peak_21967	chr5	159510134	159510717	+	487	NA	intron (NM_052927, intron 2 of 3)	intron (NM_052927, intron 2 of 3)	36027	NM_001130864	114825	Hs.744960	NM_052927	ENSG00000170234	PWWP2A	MST101	PWWP domain containing 2A	protein-coding
Yap_catlast-only89i_peak_17952	chr3	51377664	51378405	+	486	NA	intron (NM_004947, intron 37 of 52)	intron (NM_004947, intron 37 of 52)	-44634	NM_006010	7873	Hs.436446	NM_006010	ENSG00000145050	MANF	ARMET|ARP	mesencephalic astrocyte derived neurotrophic factor	protein-coding	MANF
Yap_catlast-only89i_peak_3352	chr10	73526494	73527058	+	486	NA	intron (NM_022153, intron 1 of 6)	L2b|LINE|L2	6561	NM_022153	64115	Hs.47382	NM_022153	ENSG00000107738	VSIR	B7-H5|B7H5|C10orf54|DD1alpha|GI24|PD-1H|PP2135|SISP1|VISTA	V-set immunoregulatory receptor	protein-coding
Yap_catlast-only89i_peak_746	chr1	39644066	39644639	+	485	NA	intron (NM_012090, intron 1 of 92)	intron (NM_012090, intron 1 of 92)	94513	NM_012090	23499	Hs.472475	NM_012090	ENSG00000127603	MACF1	ABP620|ACF7|MACF|OFC4	microtubule-actin crosslinking factor 1	protein-coding	MACF1
Yap_catlast-only89i_peak_9952	chr15	87912359	87913003	+	485	NA	Intergenic	L1PA16|LINE|L1	-207479	NR_026869	145978	Hs.350808	NM_152454	ENSG00000259527	LINC00052	NCRNA00052|TMEM83	long intergenic non-protein coding RNA 52	ncRNA
Yap_catlast-only89i_peak_12737	chr18	43531207	43531682	+	485	NA	intron (NM_020964, intron 3 of 43)	AluSx1|SINE|Alu	15861	NM_020964	57724	Hs.514843	NM_020964	ENSG00000152223	EPG5	HEEW1|KIAA1632|VICIS	ectopic P-granules autophagy protein 5 homolog	protein-coding	EPG5
Yap_catlast-only89i_peak_17297	chr22	39930727	39931316	+	480	NA	Intergenic	CpG	-2161	NR_130151	91582	Hs.526933	NM_194326	ENSG00000187051	RPS19BP1	AROS|S19BP	ribosomal protein S19 binding protein 1	protein-coding
Yap_catlast-only89i_peak_16853	chr21	45005906	45006316	+	480	NA	intron (NM_007031, intron 8 of 8)	Plat_L3|LINE|CR1	23759	NR_106718	102464825		NR_106718	ENSG00000278433	MIR6070	hsa-mir-6070	microRNA 6070	ncRNA	MIR6070
Yap_catlast-only89i_peak_17551	chr3	11641775	11642330	+	480	NA	intron (NM_001128219, intron 2 of 4)	intron (NM_001128219, intron 2 of 4)	4003	NM_001284391	9686	Hs.740389	NM_014667	ENSG00000144560	VGLL4	VGL-4	vestigial like family member 4	protein-coding
Yap_catlast-only89i_peak_27430	chr9	33946664	33947320	+	479	NA	intron (NM_001282529, intron 9 of 24)	MER68|LTR|ERVL	5860	NR_003685	100113379		NR_003685	ENSG00000238886	SNORD121A	-	small nucleolar RNA, C/D box 121A	snoRNA	SNORD121A
Yap_catlast-only89i_peak_9581	chr15	57648768	57649225	+	478	NA	Intergenic	AluJo|SINE|Alu	-19707	NM_032866	84952	Hs.148989	NM_032866	ENSG00000128849	CGNL1	JACOP|PCING	cingulin like 1	protein-coding	CGNL1
Yap_catlast-only89i_peak_6178	chr12	1459488	1460053	+	478	NA	intron (NM_001301248, intron 14 of 18)	intron (NM_001301248, intron 14 of 18)	-149887	NR_028415	100292680	Hs.391695	NR_028415		LINC00942	-	long intergenic non-protein coding RNA 942	ncRNA	LINC00942
Yap_catlast-only89i_peak_23017	chr6	43818857	43819334	+	478	NA	Intergenic	Intergenic	-39670	NR_024478	100132354	Hs.376232	NR_024478		LINC01512	HI-LNC77	long intergenic non-protein coding RNA 1512	ncRNA	LINC01512
Yap_catlast-only89i_peak_11671	chr17	33760095	33760961	+	477	NA	promoter-TSS (NM_018042)	promoter-TSS (NM_018042)	-333	NM_001289009	55106	Hs.663548	NM_018042	ENSG00000172123	SLFN12	SLFN3	schlafen family member 12	protein-coding
Yap_catlast-only89i_peak_17841	chr3	45053390	45053971	+	477	NA	TTS (NM_015004)	TTS (NM_015004)	-14079	NM_003278	7123	Hs.476092	NM_003278	ENSG00000163815	CLEC3B	TN|TNA	C-type lectin domain family 3 member B	protein-coding	CLEC3B
Yap_catlast-only89i_peak_18465	chr3	125986090	125986650	+	476	NA	Intergenic	CpG	-86341	NM_001270364	10840	Hs.434435	NM_012190	ENSG00000144908	ALDH1L1	10-FTHFDH|10-fTHF|FDH|FTHFD	aldehyde dehydrogenase 1 family member L1	protein-coding
Yap_catlast-only89i_peak_405	chr1	22257549	22258088	+	472	NA	intron (NM_001291860, intron 1 of 96)	intron (NM_001291860, intron 1 of 96)	5972	NM_001291860	3339	Hs.562227	NM_005529	ENSG00000142798	HSPG2	HSPG|PLC|PRCAN|SJA|SJS|SJS1	heparan sulfate proteoglycan 2	protein-coding
Yap_catlast-only89i_peak_16911	chr22	18521117	18521631	+	471	NA	TTS (NR_024417)	TTS (NR_024417)	9223	NR_024417	100192420	Hs.589947	NR_024417	ENSG00000235295	LINC01634	-	long intergenic non-protein coding RNA 1634	ncRNA
Yap_catlast-only89i_peak_27020	chr8	134174245	134174816	+	471	NA	Intergenic	Intergenic	-28752	NM_080838	8840	Hs.492974	NM_003882	ENSG00000104415	WISP1	CCN4|WISP1c|WISP1i|WISP1tc	WNT1 inducible signaling pathway protein 1	protein-coding
Yap_catlast-only89i_peak_23074	chr6	50054925	50055330	+	471	NA	Intergenic	Intergenic	-38763	NM_001037498	245915	Hs.571092	NM_001037498	ENSG00000180872	DEFB112	DEFB-12	defensin beta 112	protein-coding	DEFB112
Yap_catlast-only89i_peak_832	chr1	43672338	43673063	+	470	NA	intron (NM_001195831, intron 10 of 23)	intron (NM_001195831, intron 10 of 23)	-34459	NM_001159936	10969	Hs.346868	NM_006824	ENSG00000117395	EBNA1BP2	EBP2|NOBP|P40	EBNA1 binding protein 2	protein-coding
Yap_catlast-only89i_peak_8665	chr14	54573763	54574144	+	470	NA	Intergenic	Intergenic	-150344	NM_001202	652	Hs.68879	NM_001202	ENSG00000125378	BMP4	BMP2B|BMP2B1|MCOPS6|OFC11|ZYME	bone morphogenetic protein 4	protein-coding	BMP4
Yap_catlast-only89i_peak_12435	chr18	3247265	3247960	+	469	NA	promoter-TSS (NM_001303047)	promoter-TSS (NM_001303047)	84	NM_001303047	10627	Hs.190086	NM_006471	ENSG00000101608	MYL12A	HEL-S-24|MLC-2B|MLCB|MRCL3|MRLC3|MYL2B	myosin light chain 12A	protein-coding
Yap_catlast-only89i_peak_5540	chr11	78076287	78076767	+	469	NA	intron (NM_080491, intron 1 of 9)	intron (NM_080491, intron 1 of 9)	-23601	NM_012296	9846	Hs.429434	NM_012296	ENSG00000033327	GAB2	-	GRB2 associated binding protein 2	protein-coding	GAB2
Yap_catlast-only89i_peak_25343	chr7	129996077	129996509	+	469	NA	intron (NM_001127441, intron 6 of 13)	intron (NM_001127441, intron 6 of 13)	10675	NR_133928	105375504	Hs.436058	NR_133928		LOC105375504	-	uncharacterized LOC105375504	ncRNA
Yap_catlast-only89i_peak_26499	chr8	96497430	96497800	+	469	NA	intron (NR_038207, intron 2 of 2)	intron (NR_038207, intron 2 of 2)	-216153	NM_177965	157657	Hs.548157	NM_177965	ENSG00000156172	C8orf37	BBS21|CORD16|RP64|smalltalk	chromosome 8 open reading frame 37	protein-coding	C8orf37
Yap_catlast-only89i_peak_25509	chr7	147109781	147110282	+	469	NA	intron (NM_014141, intron 10 of 23)	intron (NM_014141, intron 10 of 23)	-34818	NR_031645	100313895		NR_031645	ENSG00000221442	MIR548F4	MIR548F-4|MIRN548F4|hsa-mir-548f-4	microRNA 548f-4	ncRNA	MIR548F4
Yap_catlast-only89i_peak_8361	chr13	114600060	114600620	+	468	NA	intron (NM_001278674, intron 1 of 7)	intron (NM_001278674, intron 1 of 7)	2264	NM_001278674	643365	Hs.127655	NM_001039767		LINC00452	LINC00453	long intergenic non-protein coding RNA 452	protein-coding
Yap_catlast-only89i_peak_27823	chr9	100985140	100986108	+	468	NA	intron (NM_018421, intron 5 of 12)	intron (NM_018421, intron 5 of 12)	5875	NR_106913	102465514		NR_106913	ENSG00000278412	MIR6854	hsa-mir-6854	microRNA 6854	ncRNA	MIR6854
Yap_catlast-only89i_peak_11879	chr17	43448968	43449708	+	468	NA	Intergenic	Intergenic	53674	NM_199282	201176	Hs.205326	NM_174919	ENSG00000159314	ARHGAP27	CAMGAP1|PP905|SH3D20|SH3P20	Rho GTPase activating protein 27	protein-coding
Yap_catlast-only89i_peak_19168	chr3	189794662	189795276	+	468	NA	intron (NM_001134418, intron 1 of 14)	intron (NM_001134418, intron 1 of 14)	-43784	NR_126419	101929152		NR_126419	ENSG00000225764	P3H2-AS1	LEPREL1-AS1	P3H2 antisense RNA 1	ncRNA	P3H2-AS1
Yap_catlast-only89i_peak_12459	chr18	3649812	3650332	+	467	NA	intron (NM_001003809, intron 4 of 9)	AluSx1|SINE|Alu	46337	NR_119377	84777	Hs.659053	NM_032691		DLGAP1-AS2	-	DLGAP1 antisense RNA 2	ncRNA
Yap_catlast-only89i_peak_9092	chr14	80052207	80052683	+	467	NA	intron (NM_001105250, intron 2 of 6)	intron (NM_001105250, intron 2 of 6)	306763	NR_073546	9369	Hs.368307	NM_004796	ENSG00000021645	NRXN3	C14orf60	neurexin 3	protein-coding
Yap_catlast-only89i_peak_1419	chr1	101666021	101666432	+	467	NA	Intergenic	Intergenic	35858	NR_104626	101928370	Hs.534209	NR_104626		LOC101928370	-	uncharacterized LOC101928370	ncRNA	LOC101928370
Yap_catlast-only89i_peak_8669	chr14	54778820	54779236	+	463	NA	Intergenic	Intergenic	-84558	NM_001330173	1033	Hs.84113	NM_005192	ENSG00000100526	CDKN3	CDI1|CIP2|KAP|KAP1	cyclin dependent kinase inhibitor 3	protein-coding
Yap_catlast-only89i_peak_26466	chr8	94892384	94893016	+	463	NA	Intergenic	Intergenic	35647	NR_039602	100616169		NR_039602	ENSG00000264448	MIR378D2	mir-378d-2	microRNA 378d-2	ncRNA	MIR378D2
Yap_catlast-only89i_peak_2446	chr1	235123108	235123534	+	463	NA	Intergenic	Intergenic	-23575	NR_125945	101927851	Hs.520684	NR_125945	ENSG00000238005	LOC101927851	-	uncharacterized LOC101927851	ncRNA	LOC101927851
Yap_catlast-only89i_peak_2796	chr10	21581587	21582093	+	463	NA	Intergenic	Intergenic	118609	NR_046284	100128511	Hs.635827	NR_046283	ENSG00000231920	NEBL-AS1	-	NEBL antisense RNA 1	ncRNA
Yap_catlast-only89i_peak_22340	chr6	5940805	5941205	+	463	NA	Intergenic	Intergenic	63272	NM_001278711	51299	Hs.103291	NM_016588	ENSG00000124785	NRN1	NRN|dJ380B8.2	neuritin 1	protein-coding
Yap_catlast-only89i_peak_12578	chr18	12730113	12730733	+	463	NA	Intergenic	Tigger1|DNA|TcMar-Tigger	18998	NR_110763	100996324	Hs.333275	NR_110763	ENSG00000267654	LINC01882	-	long intergenic non-protein coding RNA 1882	ncRNA
Yap_catlast-only89i_peak_28587	chrX	39756775	39757114	+	461	NA	Intergenic	Intergenic	199775	NM_017745	54880	Hs.659681	NM_017745	ENSG00000183337	BCOR	ANOP2|MAA2|MCOPS2	BCL6 corepressor	protein-coding	BCOR
Yap_catlast-only89i_peak_8786	chr14	62221756	62222081	+	460	NA	Intergenic	L1ME3F|LINE|L1	-4103	NR_144368	105370526	Hs.661638	NR_144368		LOC105370526	-	uncharacterized LOC105370526	ncRNA
Yap_catlast-only89i_peak_11857	chr17	42620485	42621247	+	457	NA	Intergenic	Intergenic	-13946	NM_001466	2535	Hs.142912	NM_001466	ENSG00000180340	FZD2	Fz2|fz-2|fzE2|hFz2	frizzled class receptor 2	protein-coding	FZD2
Yap_catlast-only89i_peak_25735	chr8	18577538	18578086	+	457	NA	intron (NM_015310, intron 9 of 15)	intron (NM_015310, intron 9 of 15)	88593	NM_206909	23362	Hs.434255	NM_015310	ENSG00000156011	PSD3	EFA6D|EFA6R|HCA67	pleckstrin and Sec7 domain containing 3	protein-coding
Yap_catlast-only89i_peak_6459	chr12	20627365	20627759	+	457	NA	intron (NM_000921, intron 1 of 15)	MLT1D|LTR|ERVL-MaLR	-97236	NM_001244683	5139	Hs.386791	NM_000921	ENSG00000172572	PDE3A	CGI-PDE|CGI-PDE A|CGI-PDE-A|HTNB	phosphodiesterase 3A	protein-coding
Yap_catlast-only89i_peak_15684	chr2	242486530	242486915	+	456	NA	intron (NR_033346, intron 1 of 1)	intron (NR_033346, intron 1 of 1)	-11424	NM_032515	666	Hs.293753	NM_032515	ENSG00000176720	BOK	BCL2L9|BOKL	BOK, BCL2 family apoptosis regulator	protein-coding	BOK
Yap_catlast-only89i_peak_23960	chr7	577707	578305	+	455	NA	Intergenic	Intergenic	17978	NR_033963	441307	Hs.521334	NR_033963	ENSG00000223855	HRAT92	-	heart tissue-associated transcript 92	ncRNA	HRAT92
Yap_catlast-only89i_peak_21305	chr5	97684893	97685658	+	455	NA	Intergenic	L1MA4|LINE|L1	-419724	NM_001012761	285704	Hs.526902	NM_173670	ENSG00000174136	RGMB	DRAGON	repulsive guidance molecule family member b	protein-coding
Yap_catlast-only89i_peak_7317	chr12	98868880	98869438	+	454	NA	Intergenic	AluJb|SINE|Alu	-18236	NR_033801	121456	Hs.620643	NR_033801	ENSG00000227825	SLC9A7P1	-	solute carrier family 9 member 7 pseudogene 1	pseudo	SLC9A7P1
Yap_catlast-only89i_peak_8380	chr14	21081527	21082246	+	454	NA	Intergenic	Intergenic	-22904	NM_001024822	493901	Hs.729466	NM_001024822	ENSG00000258436	RNASE12	HEL-S-85p|RAI1	ribonuclease A family member 12 (inactive)	protein-coding	RNASE12
Yap_catlast-only89i_peak_9871	chr15	75754225	75754701	+	452	NA	Intergenic	Intergenic	-6339	NM_001145357	25942	Hs.513039	NM_015477	ENSG00000169375	SIN3A	WITKOS	SIN3 transcription regulator family member A	protein-coding
Yap_catlast-only89i_peak_2142	chr1	205113843	205114312	+	452	NA	3' UTR (NM_199462, exon 12 of 12)	3' UTR (NM_199462, exon 12 of 12)	-22927	NM_001193272	5929	Hs.519230	NM_005057	ENSG00000117222	RBBP5	RBQ3|SWD1	RB binding protein 5, histone lysine methyltransferase complex subunit	protein-coding
Yap_catlast-only89i_peak_7581	chr12	120524625	120525122	+	452	NA	intron (NM_207311, intron 7 of 8)	CpG	29770	NM_001167606	11021	Hs.524788	NM_006861	ENSG00000111737	RAB35	H-ray|RAB1C|RAY	RAB35, member RAS oncogene family	protein-coding
Yap_catlast-only89i_peak_26272	chr8	59742733	59743201	+	447	NA	intron (NM_014729, intron 5 of 8)	intron (NM_014729, intron 5 of 8)	-170563	NM_003580	8439	Hs.372000	NM_003580	ENSG00000035681	NSMAF	FAN|GRAMD5	neutral sphingomyelinase activation associated factor	protein-coding	NSMAF
Yap_catlast-only89i_peak_27768	chr9	96928571	96929332	+	447	NA	Intergenic	CpG	-9288	NR_029476	406881		NR_029476	ENSG00000199165	MIRLET7A1	LET7A1|MIRNLET7A1|let-7a-1	microRNA let-7a-1	ncRNA	MIRLET7A1
Yap_catlast-only89i_peak_491	chr1	26218665	26219356	+	446	NA	intron (NM_001145454, intron 4 of 4)	MIR3|SINE|MIR	13634	NM_203401	3925	Hs.209983	NM_005563	ENSG00000117632	STMN1	C1orf215|LAP18|Lag|OP18|PP17|PP19|PR22|SMN	stathmin 1	protein-coding
Yap_catlast-only89i_peak_22075	chr5	172199002	172200068	+	445	NA	Intergenic	CpG-21390	-1332	NM_004417	1843	Hs.171695	NM_004417	ENSG00000120129	DUSP1	CL100|HVH1|MKP-1|MKP1|PTPN10	dual specificity phosphatase 1	protein-coding	DUSP1
Yap_catlast-only89i_peak_605	chr1	29598061	29598539	+	444	NA	intron (NM_133177, intron 7 of 30)	intron (NM_133177, intron 7 of 30)	35272	NM_001195001	10076	Hs.19718	NM_005704	ENSG00000060656	PTPRU	FMI|PCP-2|PTP|PTP-J|PTP-PI|PTP-RO|PTPPSI|PTPRO|PTPU2|R-PTP-PSI|R-PTP-U|hPTP-J	protein tyrosine phosphatase, receptor type U	protein-coding
Yap_catlast-only89i_peak_14989	chr2	159314328	159314990	+	444	NA	intron (NM_001005476, intron 1 of 20)	CpG	1267	NM_001304970	8502	Hs.407580	NM_003628	ENSG00000144283	PKP4	p0071	plakophilin 4	protein-coding
Yap_catlast-only89i_peak_27347	chr9	18905173	18905767	+	444	NA	intron (NM_001040272, intron 26 of 28)	intron (NM_001040272, intron 26 of 28)	127786	NM_153707	158297	Hs.731593	NM_153707	ENSG00000155875	SAXO1	C9orf138|FAM154A	stabilizer of axonemal microtubules 1	protein-coding	SAXO1
Yap_catlast-only89i_peak_1559	chr1	116088235	116089235	+	442	NA	Intergenic	Intergenic	-95839	NM_001172411	81839	Hs.515130	NM_138959	ENSG00000173218	VANGL1	KITENIN|LPP2|STB2|STBM2	VANGL planar cell polarity protein 1	protein-coding
Yap_catlast-only89i_peak_18789	chr3	150027290	150027778	+	442	NA	intron (NR_110187, intron 1 of 1)	L1ME1|LINE|L1	14000	NR_110186	101928022	Hs.555199	NR_110186		LINC01214	-	long intergenic non-protein coding RNA 1214	ncRNA	LINC01214
Yap_catlast-only89i_peak_5739	chr11	102100442	102100683	+	441	NA	exon (NM_001130145, exon 9 of 9)	exon (NM_001130145, exon 9 of 9)	-87619	NM_182962	330	Hs.127799	NM_001165	ENSG00000023445	BIRC3	AIP1|API2|CIAP2|HAIP1|HIAP1|MALT2|MIHC|RNF49|c-IAP2	baculoviral IAP repeat containing 3	protein-coding
Yap_catlast-only89i_peak_26184	chr8	48424966	48425446	+	441	NA	intron (NR_104581, intron 6 of 16)	intron (NR_104581, intron 6 of 16)	225520	NM_005195	1052	Hs.440829	NM_005195	ENSG00000221869	CEBPD	C/EBP-delta|CELF|CRP3|NF-IL6-beta	CCAAT/enhancer binding protein delta	protein-coding	CEBPD
Yap_catlast-only89i_peak_24629	chr7	55200399	55200904	+	440	NA	intron (NM_001346900, intron 1 of 27)	intron (NM_001346900, intron 1 of 27)	23141	NM_001346900	1956	Hs.488293	NM_005228	ENSG00000146648	EGFR	ERBB|ERBB1|HER1|NISBD2|PIG61|mENA	epidermal growth factor receptor	protein-coding
Yap_catlast-only89i_peak_27977	chr9	114803887	114804601	+	439	NA	intron (NM_001282643, intron 14 of 15)	intron (NM_001282643, intron 14 of 15)	109864	NR_039814	100616114		NR_039814	ENSG00000266315	MIR4668	mir-4668	microRNA 4668	ncRNA	MIR4668
Yap_catlast-only89i_peak_4737	chr11	34364679	34365164	+	439	NA	intron (NM_145804, intron 1 of 16)	intron (NM_145804, intron 1 of 16)	14634	NM_145804	25841	Hs.23361	NM_145804	ENSG00000166016	ABTB2	ABTB2A|BTBD22	ankyrin repeat and BTB domain containing 2	protein-coding	ABTB2
Yap_catlast-only89i_peak_12477	chr18	7577667	7578180	+	438	NA	intron (NM_001105244, intron 1 of 32)	intron (NM_001105244, intron 1 of 32)	10609	NM_001105244	5797	Hs.49774	NM_002845	ENSG00000173482	PTPRM	PTPRL1|R-PTP-MU|RPTPM|RPTPU|hR-PTPu	protein tyrosine phosphatase, receptor type M	protein-coding
Yap_catlast-only89i_peak_11119	chr17	836559	837169	+	434	NA	intron (NM_022463, intron 1 of 7)	intron (NM_022463, intron 1 of 7)	23992	NR_135633	101927727	Hs.666198	NR_135633	ENSG00000262003	LOC101927727	-	uncharacterized LOC101927727	ncRNA
Yap_catlast-only89i_peak_16772	chr21	38311691	38312109	+	433	NA	intron (NM_001242784, intron 3 of 11)	intron (NM_001242784, intron 3 of 11)	27056	NM_001242784	3141	Hs.371350	NM_000411	ENSG00000159267	HLCS	HCS	holocarboxylase synthetase	protein-coding
Yap_catlast-only89i_peak_10462	chr16	47921979	47922395	+	433	NA	intron (NR_110650, intron 4 of 5)	intron (NR_110650, intron 4 of 5)	-1146	NR_110649	100507534	Hs.407601	NR_110649	ENSG00000261325	LOC100507534	-	uncharacterized LOC100507534	ncRNA	LOC100507534
Yap_catlast-only89i_peak_15462	chr2	219596203	219596698	+	433	NA	intron (NM_014640, intron 2 of 19)	intron (NM_014640, intron 2 of 19)	20882	NM_014640	9654	Hs.471405	NM_014640	ENSG00000135912	TTLL4	-	tubulin tyrosine ligase like 4	protein-coding	TTLL4
Yap_catlast-only89i_peak_17442	chr22	50345924	50346448	+	432	NA	Intergenic	Intergenic	-7957	NM_001001852	415116	Hs.530381	NM_001001852	ENSG00000198355	PIM3	pim-3	Pim-3 proto-oncogene, serine/threonine kinase	protein-coding	PIM3
Yap_catlast-only89i_peak_3725	chr10	95766358	95766750	+	431	NA	intron (NM_016341, intron 1 of 32)	Plat_L3|LINE|CR1	12808	NM_001288989	51196	Hs.655033	NM_016341	ENSG00000138193	PLCE1	NPHS3|PLCE|PPLC	phospholipase C epsilon 1	protein-coding
Yap_catlast-only89i_peak_25046	chr7	100765036	100765676	+	430	NA	Intergenic	Intergenic	-5014	NM_000602	5054	Hs.414795	NM_000602	ENSG00000106366	SERPINE1	PAI|PAI-1|PAI1|PLANH1	serpin family E member 1	protein-coding	SERPINE1
Yap_catlast-only89i_peak_12920	chr18	61207320	61207762	+	430	NA	Intergenic	Intergenic	-15852	NM_080474	89777	Hs.348541	NM_080474	ENSG00000166634	SERPINB12	YUKOPIN	serpin family B member 12	protein-coding	SERPINB12
Yap_catlast-only89i_peak_2801	chr10	21625725	21626232	+	430	NA	Intergenic	Intergenic	159592	NR_031736	100302129		NR_031736	ENSG00000222071	MIR1915	MIRN1915|hsa-mir-1915	microRNA 1915	ncRNA	MIR1915
Yap_catlast-only89i_peak_3899	chr10	104389167	104389820	+	430	NA	intron (NM_016169, intron 11 of 11)	intron (NM_016169, intron 11 of 11)	-14759	NM_001345950	81603	Hs.336810	NM_030912	ENSG00000171206	TRIM8	GERP|RNF27	tripartite motif containing 8	protein-coding
Yap_catlast-only89i_peak_968	chr1	54953879	54954319	+	429	NA	Intergenic	CpG	-59708	NM_015547	26027	Hs.745173	NM_015547	ENSG00000162390	ACOT11	BFIT|STARD14|THEA|THEM1	acyl-CoA thioesterase 11	protein-coding	ACOT11
Yap_catlast-only89i_peak_26374	chr8	71520481	71521002	+	428	NA	promoter-TSS (NR_038881)	promoter-TSS (NR_038881)	-47	NM_001317804	23471	Hs.491988	NM_014294	ENSG00000067167	TRAM1	PNAS8|TRAM|TRAMP	translocation associated membrane protein 1	protein-coding
Yap_catlast-only89i_peak_1178	chr1	77980102	77980583	+	428	NA	intron (NM_174858, intron 10 of 13)	intron (NM_174858, intron 10 of 13)	168001	NM_015534	26009	Hs.480506	NM_015534	ENSG00000036549	ZZZ3	ATAC1	zinc finger ZZ-type containing 3	protein-coding	ZZZ3
Yap_catlast-only89i_peak_5426	chr11	73205291	73205739	+	428	NA	intron (NM_015159, intron 1 of 7)	intron (NM_015159, intron 1 of 7)	103719	NM_001286051	23201	Hs.475334	NM_015159	ENSG00000054965	FAM168A	KIAA0280|TCRP1	family with sequence similarity 168 member A	protein-coding
Yap_catlast-only89i_peak_22041	chr5	169577882	169578533	+	427	NA	Intergenic	Intergenic	45290	NM_144769	2299	Hs.87236	NM_012188	ENSG00000168269	FOXI1	FKH10|FKHL10|FREAC-6|FREAC6|HFH-3|HFH3	forkhead box I1	protein-coding
Yap_catlast-only89i_peak_18959	chr3	170462961	170463615	+	427	NA	intron (NR_135556, intron 5 of 5)	intron (NR_135556, intron 5 of 5)	124757	NM_001320451	200916	Hs.380933	NM_001099645	ENSG00000163584	RPL22L1	-	ribosomal protein L22 like 1	protein-coding
Yap_catlast-only89i_peak_7162	chr12	79940829	79941473	+	427	NA	Intergenic	Intergenic	128114	NR_031700	100302136		NR_031700	ENSG00000221788	MIR1252	MIRN1252|hsa-mir-1252	microRNA 1252	ncRNA	MIR1252
Yap_catlast-only89i_peak_14642	chr2	95981604	95982092	+	426	NA	intron (NM_013434, intron 2 of 8)	ERVL-E-int|LTR|ERVL	18776	NM_013434	30818	Hs.437376	NM_013434	ENSG00000115041	KCNIP3	CSEN|DREAM|KCHIP3	potassium voltage-gated channel interacting protein 3	protein-coding	KCNIP3
Yap_catlast-only89i_peak_13368	chr19	16449534	16450110	+	426	NA	Intergenic	Intergenic	14185	NM_016270	10365	Hs.685136	NM_016270	ENSG00000127528	KLF2	LKLF	Kruppel like factor 2	protein-coding	KLF2
Yap_catlast-only89i_peak_5138	chr11	64622411	64622789	+	425	NA	intron (NM_006795, intron 4 of 4)	intron (NM_006795, intron 4 of 4)	-10559	NM_017525	55561	Hs.293590	NM_017525	ENSG00000171219	CDC42BPG	DMPK2|HSMDPKIN|KAPPA-200|MRCKG|MRCKgamma	CDC42 binding protein kinase gamma	protein-coding	CDC42BPG
Yap_catlast-only89i_peak_26212	chr8	49448432	49448903	+	425	NA	Intergenic	Intergenic	-15460	NR_105002	101929268	Hs.683934	NR_105002	ENSG00000253608	LOC101929268	-	uncharacterized LOC101929268	ncRNA	LOC101929268
Yap_catlast-only89i_peak_3216	chr10	63853635	63854139	+	424	NA	3' UTR (NM_001244638, exon 7 of 7)	3' UTR (NM_001244638, exon 7 of 7)	44917	NM_001244638	84159	Hs.535297	NM_032199	ENSG00000150347	ARID5B	DESRT|MRF-2|MRF2	AT-rich interaction domain 5B	protein-coding
Yap_catlast-only89i_peak_16921	chr22	19161851	19162370	+	421	NA	TTS (NM_001256534)	TTS (NM_001256534)	2891	NR_103767	100652736	Hs.572896	NR_103767		LINC01311	-	long intergenic non-protein coding RNA 1311	ncRNA	LINC01311
Yap_catlast-only89i_peak_15482	chr2	220553466	220554173	+	421	NA	Intergenic	Intergenic	61527	NR_048551	6508	Hs.1176	NM_005070	ENSG00000114923	SLC4A3	AE3|CAE3/BAE3|SLC2C	solute carrier family 4 member 3	protein-coding
Yap_catlast-only89i_peak_20836	chr5	40552238	40552749	+	420	NA	Intergenic	Intergenic	-127539	NM_000958	5734	Hs.199248	NM_000958	ENSG00000171522	PTGER4	EP4|EP4R	prostaglandin E receptor 4	protein-coding	PTGER4
Yap_catlast-only89i_peak_23993	chr7	1576679	1577249	+	419	NA	intron (NM_002360, intron 1 of 2)	intron (NM_002360, intron 1 of 2)	6596	NM_002360	7975	Hs.520612	NM_002360	ENSG00000198517	MAFK	NFE2U|P18	MAF bZIP transcription factor K	protein-coding	MAFK
Yap_catlast-only89i_peak_17882	chr3	46976967	46977459	+	419	NA	intron (NM_144716, intron 3 of 7)	intron (NM_144716, intron 3 of 7)	40778	NR_102269	151903	Hs.631918	NM_144716	ENSG00000160799	CCDC12	-	coiled-coil domain containing 12	protein-coding
Yap_catlast-only89i_peak_5376	chr11	71010331	71010871	+	419	NA	Intergenic	Intergenic	-74759	NM_012309	22941	Hs.268726	NM_012309	ENSG00000162105	SHANK2	AUTS17|CORTBP1|CTTNBP1|ProSAP1|SHANK|SPANK-3	SH3 and multiple ankyrin repeat domains 2	protein-coding	SHANK2
Yap_catlast-only89i_peak_6884	chr12	56448296	56449087	+	419	NA	Intergenic	Intergenic	13005	NM_001029	6231	Hs.447562	NM_001029	ENSG00000197728	RPS26	DBA10|S26	ribosomal protein S26	protein-coding	RPS26
Yap_catlast-only89i_peak_5905	chr11	118409292	118410210	+	418	NA	intron (NM_001144038, intron 7 of 7)	L1MA4A|LINE|L1	-7942	NR_120576	101929089	Hs.666633	NR_120572	ENSG00000255435	LOC101929089	-	uncharacterized LOC101929089	ncRNA
Yap_catlast-only89i_peak_18635	chr3	138542460	138543217	+	418	NA	Intergenic	Intergenic	-64637	NM_006219	5291	Hs.239818	NM_006219	ENSG00000051382	PIK3CB	P110BETA|PI3K|PI3KBETA|PIK3C1	phosphatidylinositol-4,5-bisphosphate 3-kinase catalytic subunit beta	protein-coding	PIK3CB
Yap_catlast-only89i_peak_2552	chr1	249115339	249115793	+	417	NA	intron (NM_001322462, intron 1 of 8)	intron (NM_001322462, intron 1 of 8)	3999	NM_001322462	80851	Hs.298573	NM_030645	ENSG00000175137	SH3BP5L	-	SH3 binding domain protein 5 like	protein-coding
Yap_catlast-only89i_peak_12168	chr17	64545486	64546322	+	417	NA	intron (NM_002737, intron 3 of 16)	intron (NM_002737, intron 3 of 16)	-132932	NR_110822	101928001	Hs.650730	NR_110822		PRKCA-AS1	-	PRKCA antisense RNA 1	ncRNA	PRKCA-AS1
Yap_catlast-only89i_peak_3699	chr10	95048582	95049111	+	416	NA	Intergenic	Intergenic	193228	NM_133337	26509	Hs.602086	NM_013451	ENSG00000138119	MYOF	FER1L3	myoferlin	protein-coding
Yap_catlast-only89i_peak_8410	chr14	23082926	23083735	+	416	NA	Intergenic	Intergenic	16183	NM_022060	63874	Hs.445665	NM_022060	ENSG00000100439	ABHD4	ABH4	abhydrolase domain containing 4	protein-coding	ABHD4
Yap_catlast-only89i_peak_13542	chr19	38791370	38791926	+	415	NA	Intergenic	L2a|LINE|L2	-3153	NM_001317801	64073	Hs.631544	NM_022125	ENSG00000167644	C19orf33	H2RSP|IMUP|IMUP-1|IMUP-2	chromosome 19 open reading frame 33	protein-coding
Yap_catlast-only89i_peak_5244	chr11	66095723	66096131	+	415	NA	Intergenic	Intergenic	8073	NM_004292	9610	Hs.1030	NM_004292	ENSG00000174791	RIN1	-	Ras and Rab interactor 1	protein-coding	RIN1
Yap_catlast-only89i_peak_12589	chr18	12946589	12947316	+	414	NA	Intergenic	L2|LINE|L2	-1031	NM_031216	81929	Hs.301048	NM_031216	ENSG00000085415	SEH1L	SEC13L|SEH1A|SEH1B|Seh1	SEH1 like nucleoporin	protein-coding	SEH1L
Yap_catlast-only89i_peak_6071	chr11	126861992	126862423	+	414	NA	intron (NM_032531, intron 1 of 16)	L3|LINE|CR1	-3769	NR_036126	100422918		NR_036126	ENSG00000266215	MIR3167	-	microRNA 3167	ncRNA	MIR3167
Yap_catlast-only89i_peak_20682	chr5	32810854	32811309	+	414	NA	Intergenic	Intergenic	99643	NM_001204375	4883	Hs.13528	NM_000908	ENSG00000113389	NPR3	ANP-C|ANPR-C|ANPRC|C5orf23|GUCY2B|NPR-C|NPRC	natriuretic peptide receptor 3	protein-coding
Yap_catlast-only89i_peak_12762	chr18	46014831	46015454	+	412	NA	Intergenic	Intergenic	-50285	NM_014772	9811	Hs.145230	NM_014772	ENSG00000134030	CTIF	Gm672|KIAA0427	cap binding complex dependent translation initiation factor	protein-coding	CTIF
Yap_catlast-only89i_peak_5978	chr11	121909198	121909815	+	411	NA	intron (NR_137178, intron 3 of 4)	intron (NR_137178, intron 3 of 4)	61046	NR_029671	406911		NR_029671	ENSG00000207971	MIR125B1	MIRN125B1|mir-125b-1	microRNA 125b-1	ncRNA	MIR125B1
Yap_catlast-only89i_peak_26853	chr8	124485437	124486048	+	410	NA	Intergenic	AluSz|SINE|Alu	56777	NM_001283024	55093	Hs.18029	NM_018024	ENSG00000156795	WDYHV1	C8orf32	WDYHV motif containing 1	protein-coding
Yap_catlast-only89i_peak_2877	chr10	29430691	29431077	+	410	NA	Intergenic	Intergenic	-147106	NM_032517	84569	Hs.558572	NM_032517	ENSG00000120563	LYZL1	KAAG648|LYC2|LYZD1|PRO1278|bA534G20.1	lysozyme like 1	protein-coding	LYZL1
Yap_catlast-only89i_peak_15415	chr2	214052717	214053439	+	410	NA	Intergenic	Intergenic	-36745	NM_001079526	22807	Hs.604950	NM_016260	ENSG00000030419	IKZF2	ANF1A2|HELIOS|ZNF1A2|ZNFN1A2	IKAROS family zinc finger 2	protein-coding
Yap_catlast-only89i_peak_12887	chr18	57482105	57482643	+	409	NA	Intergenic	HAL1|LINE|L1	-84818	NM_021127	5366	Hs.96	NM_021127	ENSG00000141682	PMAIP1	APR|NOXA	phorbol-12-myristate-13-acetate-induced protein 1	protein-coding	PMAIP1
Yap_catlast-only89i_peak_14019	chr2	12164375	12164780	+	409	NA	intron (NR_110196, intron 2 of 5)	intron (NR_110196, intron 2 of 5)	17335	NR_110196	100506457	Hs.197824	NR_110196	ENSG00000224184	MIR3681HG	-	MIR3681 host gene	ncRNA
Yap_catlast-only89i_peak_1233	chr1	85785977	85786510	+	409	NA	3' UTR (NM_012137, exon 6 of 6)	3' UTR (NM_012137, exon 6 of 6)	-43656	NM_001320715	8915	Hs.193516	NM_003921	ENSG00000142867	BCL10	CARMEN|CIPER|CLAP|IMD37|c-E10|mE10	B-cell CLL/lymphoma 10	protein-coding
Yap_catlast-only89i_peak_7791	chr13	24075018	24075517	+	408	NA	Intergenic	Intergenic	31616	NR_038995	100506697	Hs.50118	NR_038995	ENSG00000232977	LINC00327	NCRNA00327	long intergenic non-protein coding RNA 327	ncRNA	LINC00327
Yap_catlast-only89i_peak_20510	chr5	10551323	10552001	+	408	NA	Intergenic	Intergenic	-12773	NM_001164440	651746	Hs.26039	NM_001164440	ENSG00000164236	ANKRD33B	-	ankyrin repeat domain 33B	protein-coding	ANKRD33B
Yap_catlast-only89i_peak_3351	chr10	73519024	73519471	+	408	NA	intron (NM_022153, intron 3 of 6)	AluJo|SINE|Alu	14090	NM_022153	64115	Hs.47382	NM_022153	ENSG00000107738	VSIR	B7-H5|B7H5|C10orf54|DD1alpha|GI24|PD-1H|PP2135|SISP1|VISTA	V-set immunoregulatory receptor	protein-coding
Yap_catlast-only89i_peak_20431	chr5	956958	957434	+	408	NA	Intergenic	Intergenic	40259	NR_104614	100506688	Hs.532063	NM_001242737	ENSG00000215246	LOC100506688	-	uncharacterized LOC100506688	ncRNA
Yap_catlast-only89i_peak_17227	chr22	37892966	37893551	+	408	NA	intron (NM_014550, intron 11 of 19)	L2b|LINE|L2	-10780	NM_002405	4242	Hs.517603	NM_002405	ENSG00000100060	MFNG	-	MFNG O-fucosylpeptide 3-beta-N-acetylglucosaminyltransferase	protein-coding	MFNG
Yap_catlast-only89i_peak_14154	chr2	28021965	28022741	+	408	NA	intron (NM_022128, intron 7 of 7)	intron (NM_022128, intron 7 of 7)	27769	NM_145330	9553	Hs.515879	NM_004891	ENSG00000243147	MRPL33	C2orf1|L33mt|MRP-L33|RPL33L	mitochondrial ribosomal protein L33	protein-coding
Yap_catlast-only89i_peak_21258	chr5	93553955	93554504	+	406	NA	intron (NM_001145678, intron 20 of 20)	L2b|LINE|L2	-106825	NM_001163418	83989	Hs.600086	NM_032042	ENSG00000113391	FAM172A	C5orf21	family with sequence similarity 172 member A	protein-coding
Yap_catlast-only89i_peak_11733	chr17	37641827	37642243	+	406	NA	intron (NM_016507, intron 2 of 13)	AluJb|SINE|Alu	24271	NM_015083	51755	Hs.345028	NM_015083	ENSG00000167258	CDK12	CRK7|CRKR|CRKRS	cyclin dependent kinase 12	protein-coding	CDK12
Yap_catlast-only89i_peak_9882	chr15	77436776	77437561	+	406	NA	intron (NM_024776, intron 6 of 7)	intron (NM_024776, intron 6 of 7)	-73598	NM_198902	10099	Hs.744863	NM_005724	ENSG00000140391	TSPAN3	TM4-A|TM4SF8|TSPAN-3	tetraspanin 3	protein-coding
Yap_catlast-only89i_peak_6892	chr12	56551480	56551861	+	406	NA	promoter-TSS (NM_021019)	promoter-TSS (NM_021019)	-375	NM_021019	4637	Hs.632717	NM_021019	ENSG00000092841	MYL6	ESMLC|LC17|LC17-GI|LC17-NM|LC17A|LC17B|MLC-3|MLC1SM|MLC3NM|MLC3SM	myosin light chain 6	protein-coding	MYL6
Yap_catlast-only89i_peak_313	chr1	17914052	17914516	+	406	NA	intron (NM_001319837, intron 2 of 25)	intron (NM_001319837, intron 2 of 25)	7236	NM_001011722	55160	Hs.443460	NM_018125	ENSG00000074964	ARHGEF10L	GrinchGEF	Rho guanine nucleotide exchange factor 10 like	protein-coding
Yap_catlast-only89i_peak_17043	chr22	27531594	27532016	+	405	NA	Intergenic	Intergenic	-51673	NM_001318392	105372977	Hs.743180	NM_001318392		LOC105372977	-	uncharacterized LOC105372977	protein-coding
Yap_catlast-only89i_peak_4134	chr10	123811011	123811507	+	403	NA	intron (NM_206861, intron 3 of 19)	intron (NM_206861, intron 3 of 19)	-61295	NM_001291879	10579	Hs.501252	NM_006997	ENSG00000138162	TACC2	AZU-1|ECTACC	transforming acidic coiled-coil containing protein 2	protein-coding
Yap_catlast-only89i_peak_25660	chr8	11373260	11373868	+	403	NA	intron (NM_001330465, intron 1 of 11)	L1MB3|LINE|L1	22043	NM_001715	640	Hs.146591	NM_001715	ENSG00000136573	BLK	MODY11	BLK proto-oncogene, Src family tyrosine kinase	protein-coding	BLK
Yap_catlast-only89i_peak_22441	chr6	12548588	12549170	+	403	NA	Intergenic	Intergenic	-168009	NM_001242648	221692	Hs.436996	NM_030948	ENSG00000112137	PHACTR1	RPEL|RPEL1|dJ257A7.2	phosphatase and actin regulator 1	protein-coding
Yap_catlast-only89i_peak_7274	chr12	95377456	95377977	+	402	NA	intron (NM_001258338, intron 2 of 2)	intron (NM_001258338, intron 2 of 2)	19773	NM_018838	55967	Hs.506374	NM_018838	ENSG00000184752	NDUFA12	B17.2|DAP13	NADH:ubiquinone oxidoreductase subunit A12	protein-coding	NDUFA12
Yap_catlast-only89i_peak_27461	chr9	35518100	35518572	+	402	NA	intron (NM_001330740, intron 1 of 10)	intron (NM_001330740, intron 1 of 10)	-20293	NM_001135999	9853	Hs.493796	NM_014806	ENSG00000198853	RUSC2	Iporin	RUN and SH3 domain containing 2	protein-coding
Yap_catlast-only89i_peak_22577	chr6	26032842	26033393	+	399	NA	promoter-TSS (NM_003537)	promoter-TSS (NM_003537)	679	NM_003513	8335	Hs.248174	NM_003513	ENSG00000278463	HIST1H2AB	H2A/m|H2AFM	histone cluster 1 H2A family member b	protein-coding	HIST1H2AB
Yap_catlast-only89i_peak_16850	chr21	44917770	44918287	+	398	NA	Intergenic	Intergenic	-18614	NR_136540	102724354	Hs.592161	NR_136540	ENSG00000280191	LINC01669	-	long intergenic non-protein coding RNA 1669	ncRNA
Yap_catlast-only89i_peak_19680	chr4	55409339	55409797	+	398	NA	Intergenic	Intergenic	63730	NR_134657	339978		NR_134657	ENSG00000250456	LOC339978	-	uncharacterized LOC339978	ncRNA
Yap_catlast-only89i_peak_26819	chr8	123122913	123123320	+	398	NA	Intergenic	L1ME1|LINE|L1	457767	NR_131202	105375734	Hs.628341	NR_131202		LOC105375734	-	uncharacterized LOC105375734	ncRNA	LOC105375734
Yap_catlast-only89i_peak_23951	chr7	101723	102112	+	398	NA	Intergenic	Intergenic	47521	NR_134325	102723672	Hs.605204	NR_134325		LOC102723672	-	uncharacterized LOC102723672	ncRNA
Yap_catlast-only89i_peak_2763	chr10	17715654	17716074	+	398	NA	intron (NM_001324284, intron 3 of 14)	intron (NM_001324284, intron 3 of 14)	29740	NM_001324288	8027	Hs.335391	NM_003473	ENSG00000136738	STAM	STAM-1|STAM1	signal transducing adaptor molecule	protein-coding
Yap_catlast-only89i_peak_22559	chr6	22881217	22881569	+	397	NA	Intergenic	Intergenic	-163240	NR_134613	105374972	Hs.484889	NR_134613		LOC105374972	-	uncharacterized LOC105374972	ncRNA
Yap_catlast-only89i_peak_14030	chr2	12674799	12675369	+	397	NA	intron (NR_110196, intron 4 of 5)	intron (NR_110196, intron 4 of 5)	-181914	NR_027303	28951	Hs.467751	NM_021643	ENSG00000071575	TRIB2	C5FW|GS3955|TRB2	tribbles pseudokinase 2	protein-coding
Yap_catlast-only89i_peak_12040	chr17	57293837	57294374	+	397	NA	Intergenic	AluSc|SINE|Alu	-3723	NM_182569	284161	Hs.631744	NM_182569	ENSG00000153982	GDPD1	GDE4	glycerophosphodiester phosphodiesterase domain containing 1	protein-coding	GDPD1
Yap_catlast-only89i_peak_13184	chr19	10119376	10119834	+	396	NA	intron (NM_015719, intron 1 of 66)	intron (NM_015719, intron 1 of 66)	1542	NM_015719	50509	Hs.235368	NM_015719	ENSG00000080573	COL5A3	-	collagen type V alpha 3 chain	protein-coding	COL5A3
Yap_catlast-only89i_peak_28777	chrX	83757143	83757864	+	395	NA	promoter-TSS (NM_001177478)	promoter-TSS (NM_001177478)	-16	NM_001177478	139324	Hs.559546	NM_144657	ENSG00000165259	HDX	CXorf43|D030011N01Rik	highly divergent homeobox	protein-coding
Yap_catlast-only89i_peak_7687	chr12	124869689	124870291	+	393	NA	intron (NM_001077261, intron 19 of 47)	intron (NM_001077261, intron 19 of 47)	-48202	NR_106940	102466204		NR_106940	ENSG00000275967	MIR6880	hsa-mir-6880	microRNA 6880	ncRNA	MIR6880
Yap_catlast-only89i_peak_14172	chr2	28884449	28884992	+	392	NA	Intergenic	Intergenic	-89894	NM_206876	5500	Hs.702907	NM_002709	ENSG00000213639	PPP1CB	HEL-S-80p|PP-1B|PP1B|PP1beta|PPP1CD	protein phosphatase 1 catalytic subunit beta	protein-coding
Yap_catlast-only89i_peak_28718	chrX	63141972	63142542	+	391	NA	Intergenic	L3|LINE|CR1	-136290	NR_031567	100302115		NR_031567	ENSG00000222532	MIR1468	MIRN1468|hsa-mir-1468|mir-1468	microRNA 1468	ncRNA	MIR1468
Yap_catlast-only89i_peak_10933	chr16	84862877	84863314	+	390	NA	intron (NM_031476, intron 1 of 14)	intron (NM_031476, intron 1 of 14)	9508	NM_031476	83716	Hs.513779	NM_031476	ENSG00000103196	CRISPLD2	CRISP11|LCRISP2|LGL1	cysteine rich secretory protein LCCL domain containing 2	protein-coding	CRISPLD2
Yap_catlast-only89i_peak_24581	chr7	48134538	48134998	+	390	NA	intron (NM_001287428, intron 4 of 6)	intron (NM_001287428, intron 4 of 6)	5917	NM_001287430	7378	Hs.488240	NM_003364	ENSG00000183696	UPP1	UDRPASE|UP|UPASE|UPP	uridine phosphorylase 1	protein-coding
Yap_catlast-only89i_peak_20863	chr5	43078934	43079500	+	389	NA	intron (NR_102752, intron 2 of 2)	LTR23|LTR|ERV1	-11676	NR_104651	648987	Hs.649468	NR_034085	ENSG00000177738	LOC648987	-	uncharacterized LOC648987	ncRNA
Yap_catlast-only89i_peak_1598	chr1	144941178	144941598	+	389	NA	intron (NR_144517, intron 7 of 42)	intron (NR_144517, intron 7 of 42)	-9023	NM_001002811	9659	Hs.584841	NM_014644	ENSG00000178104	PDE4DIP	CMYA2|MMGL	phosphodiesterase 4D interacting protein	protein-coding
Yap_catlast-only89i_peak_2975	chr10	33526918	33527269	+	389	NA	intron (NM_001024628, intron 6 of 11)	intron (NM_001024628, intron 6 of 11)	96740	NM_001330068	8829	Hs.131704	NM_003873	ENSG00000099250	NRP1	BDCA4|CD304|NP1|NRP|VEGF165R	neuropilin 1	protein-coding
Yap_catlast-only89i_peak_6094	chr11	128392396	128392819	+	389	NA	promoter-TSS (NM_005238)	promoter-TSS (NM_005238)	-311	NM_001330451	2113	Hs.369438	NM_005238	ENSG00000134954	ETS1	ETS-1|EWSR2|c-ets-1|p54	ETS proto-oncogene 1, transcription factor	protein-coding
Yap_catlast-only89i_peak_8424	chr14	23451798	23452335	+	388	NA	promoter-TSS (NM_032876)	promoter-TSS (NM_032876)	-215	NM_032876	84962	Hs.655832	NM_032876	ENSG00000129474	AJUBA	JUB	ajuba LIM protein	protein-coding	AJUBA
Yap_catlast-only89i_peak_20002	chr4	122706114	122706536	+	388	NA	Intergenic	Intergenic	-16147	NM_005033	5393	Hs.91728	NM_005033	ENSG00000123737	EXOSC9	PM/Scl-75|PMSCL1|RRP45|Rrp45p|p5|p6	exosome component 9	protein-coding	EXOSC9
Yap_catlast-only89i_peak_27919	chr9	112580137	112580557	+	387	NA	intron (NM_001037293, intron 2 of 6)	intron (NM_001037293, intron 2 of 6)	37770	NM_007203	445815	Hs.591908	NM_007203	ENSG00000157654	PALM2-AKAP2	AKAP2	PALM2-AKAP2 readthrough	protein-coding	PALM2-AKAP2
Yap_catlast-only89i_peak_19082	chr3	185531371	185531760	+	387	NA	intron (NR_138486, intron 2 of 15)	intron (NR_138486, intron 2 of 15)	7354	NM_001291874	10644	Hs.35354	NM_006548	ENSG00000073792	IGF2BP2	IMP-2|IMP2|VICKZ2	insulin like growth factor 2 mRNA binding protein 2	protein-coding
Yap_catlast-only89i_peak_13318	chr19	13964041	13964658	+	387	NA	Intergenic	Tigger7|DNA|TcMar-Tigger	-16876	NR_029495	407010		NR_029495	ENSG00000207980	MIR23A	MIRN23A|hsa-mir-23a|miRNA23A|mir-23a	microRNA 23a	ncRNA	MIR23A
Yap_catlast-only89i_peak_19522	chr4	26328291	26328908	+	387	NA	intron (NM_015874, intron 1 of 10)	intron (NM_015874, intron 1 of 10)	6170	NM_203284	3516	Hs.479396	NM_005349	ENSG00000168214	RBPJ	AOS3|CBF1|IGKJRB|IGKJRB1|KBF2|RBP-J|RBPJK|RBPSUH|SUH|csl	recombination signal binding protein for immunoglobulin kappa J region	protein-coding
Yap_catlast-only89i_peak_6278	chr12	6395882	6396318	+	386	NA	Intergenic	AluSx3|SINE|Alu	-23502	NM_018173	55200	Hs.631660	NM_018173	ENSG00000008323	PLEKHG6	MyoGEF	pleckstrin homology and RhoGEF domain containing G6	protein-coding	PLEKHG6
Yap_catlast-only89i_peak_23933	chr6	166438561	166439074	+	386	NA	Intergenic	L1ME3|LINE|L1	-37290	NR_026860	90632	Hs.31917	NR_026860	ENSG00000223414	LINC00473	C6orf176|bA142J11.1	long intergenic non-protein coding RNA 473	ncRNA	LINC00473
Yap_catlast-only89i_peak_26990	chr8	131274970	131275430	+	385	NA	intron (NM_001247996, intron 4 of 30)	intron (NM_001247996, intron 4 of 30)	33579	NR_002765	29065	Hs.639318	NR_002765		ASAP1-IT1	ASAP1-IT|ASAP1IT|ASAP1IT1|DDEF1IT1|HSPC054|NCRNA00050	ASAP1 intronic transcript 1	ncRNA	ASAP1-IT1
Yap_catlast-only89i_peak_12493	chr18	8800481	8801414	+	385	NA	intron (NM_015210, intron 10 of 16)	intron (NM_015210, intron 10 of 16)	83578	NM_015210	23255	Hs.707920	NM_015210	ENSG00000168502	MTCL1	CCDC165|KIAA0802|SOGA2	microtubule crosslinking factor 1	protein-coding	MTCL1
Yap_catlast-only89i_peak_17201	chr22	36753920	36754462	+	385	NA	intron (NM_002473, intron 1 of 40)	AluSx3|SINE|Alu	29921	NM_002473	4627	Hs.474751	NM_002473	ENSG00000100345	MYH9	BDPLT6|DFNA17|EPSTS|FTNS|MHA|NMHC-II-A|NMMHC-IIA|NMMHCA	myosin heavy chain 9	protein-coding	MYH9
Yap_catlast-only89i_peak_5221	chr11	65670594	65671019	+	384	NA	Intergenic	Intergenic	-2809	NM_005438	8061	Hs.283565	NM_005438	ENSG00000175592	FOSL1	FRA|FRA1|fra-1	FOS like 1, AP-1 transcription factor subunit	protein-coding	FOSL1
Yap_catlast-only89i_peak_10546	chr16	56998601	56999155	+	384	NA	intron (NM_001286085, intron 2 of 14)	AluJb|SINE|Alu	3043	NM_001286085	1071	Hs.89538	NM_000078	ENSG00000087237	CETP	BPIFF|HDLCQ10	cholesteryl ester transfer protein	protein-coding
Yap_catlast-only89i_peak_7533	chr12	115842969	115843430	+	382	NA	Intergenic	Intergenic	-721230	NM_005996	6926	Hs.744016	NM_005996	ENSG00000135111	TBX3	TBX3-ISO|UMS|XHL	T-box 3	protein-coding	TBX3
Yap_catlast-only89i_peak_171	chr1	10115648	10116116	+	382	NA	intron (NM_006048, intron 1 of 26)	AluSz|SINE|Alu	22841	NM_006048	10277	Hs.593974	NM_006048	ENSG00000130939	UBE4B	E4|HDNB1|UBOX3|UFD2|UFD2A	ubiquitination factor E4B	protein-coding	UBE4B
Yap_catlast-only89i_peak_18917	chr3	160881056	160881420	+	382	NA	Intergenic	MLT1J|LTR|ERVL-MaLR	-57840	NM_015938	51068	Hs.598836	NM_015938	ENSG00000169251	NMD3	CGI-07	NMD3 ribosome export adaptor	protein-coding	NMD3
Yap_catlast-only89i_peak_26839	chr8	123972025	123972518	+	382	NA	intron (NM_014943, intron 3 of 3)	L2c|LINE|L2	82392	NM_001330601	79139	Hs.241576	NM_024295	ENSG00000136986	DERL1	DER-1|DER1|derlin-1	derlin 1	protein-coding
Yap_catlast-only89i_peak_24286	chr7	25889273	25889883	+	381	NA	Intergenic	Intergenic	100028	NR_029597	406940		NR_029597	ENSG00000199085	MIR148A	MIRN148|MIRN148A|hsa-mir-148|mir-148a	microRNA 148a	ncRNA	MIR148A
Yap_catlast-only89i_peak_384	chr1	21868285	21868736	+	381	NA	intron (NM_001127501, intron 1 of 10)	intron (NM_001127501, intron 1 of 10)	32659	NM_001177520	249	Hs.75431	NM_000478	ENSG00000162551	ALPL	AP-TNAP|APTNAP|HOPS|TNAP|TNSALP	alkaline phosphatase, liver/bone/kidney	protein-coding
Yap_catlast-only89i_peak_18585	chr3	134182675	134183445	+	380	NA	Intergenic	Intergenic	-21515	NM_001042384	80254	Hs.443301	NM_025180	ENSG00000182923	CEP63	SCKL6	centrosomal protein 63	protein-coding
Yap_catlast-only89i_peak_75	chr1	6784636	6785081	+	379	NA	promoter-TSS (NR_104620)	promoter-TSS (NR_104620)	53	NR_104620	100505887	Hs.250839	NR_104620		LINC01672	-	long intergenic non-protein coding RNA 1672	ncRNA
Yap_catlast-only89i_peak_24038	chr7	4784516	4784796	+	379	NA	intron (NM_001037165, intron 2 of 8)	intron (NM_001037165, intron 2 of 8)	-30606	NM_014855	9907	Hs.558440	NM_014855	ENSG00000242802	AP5Z1	KIAA0415|SPG48|zeta	adaptor related protein complex 5 zeta 1 subunit	protein-coding	AP5Z1
Yap_catlast-only89i_peak_4563	chr11	14443728	14444348	+	379	NA	Intergenic	Intergenic	-57986	NM_001177314	22800	Hs.502004	NM_012250	ENSG00000133818	RRAS2	TC21	related RAS viral (r-ras) oncogene homolog 2	protein-coding
Yap_catlast-only89i_peak_22744	chr6	32222987	32223311	+	377	NA	non-coding (NR_136246, exon 1 of 2)	non-coding (NR_136246, exon 1 of 2)	199	NR_136245	101929163	Hs.57692	NM_001013681	ENSG00000277427	LOC101929163	-	uncharacterized LOC101929163	ncRNA
Yap_catlast-only89i_peak_23443	chr6	107683155	107683458	+	377	NA	intron (NM_020381, intron 1 of 7)	intron (NM_020381, intron 1 of 7)	97473	NM_020381	57107	Hs.745008	NM_020381	ENSG00000164494	PDSS2	C6orf210|COQ10D3|DLP1|bA59I9.3|hDLP1	decaprenyl diphosphate synthase subunit 2	protein-coding	PDSS2
Yap_catlast-only89i_peak_3485	chr10	79284075	79284572	+	377	NA	intron (NM_001322832, intron 1 of 27)	intron (NM_001322832, intron 1 of 27)	113254	NM_001322837	3778	Hs.144795	NM_002247	ENSG00000156113	KCNMA1	BKTM|KCa1.1|MaxiK|SAKCA|SLO|SLO-ALPHA|SLO1|bA205K10.1|hSlo|mSLO1	potassium calcium-activated channel subfamily M alpha 1	protein-coding
Yap_catlast-only89i_peak_24388	chr7	33756215	33756736	+	376	NA	Intergenic	Intergenic	-188048	NM_133468	168667	Hs.660998	NM_133468	ENSG00000164619	BMPER	CRIM3|CV-2|CV2	BMP binding endothelial regulator	protein-coding	BMPER
Yap_catlast-only89i_peak_16650	chr21	28943972	28944423	+	376	NA	Intergenic	Intergenic	-150501	NR_024357	54088	Hs.570434	NR_024357	ENSG00000225298	LINC00113	C21orf23|NCRNA00113	long intergenic non-protein coding RNA 113	ncRNA	LINC00113
Yap_catlast-only89i_peak_691	chr1	35734121	35734811	+	376	NA	promoter-TSS (NM_005095)	promoter-TSS (NM_005095)	-102	NM_005095	9202	Hs.269211	NM_005095	ENSG00000146463	ZMYM4	CDIR|MYM|ZNF198L3|ZNF262	zinc finger MYM-type containing 4	protein-coding	ZMYM4
Yap_catlast-only89i_peak_4090	chr10	120932153	120932444	+	376	NA	intron (NR_126105, intron 2 of 4)	AluJo|SINE|Alu	6079	NR_126106	10935	Hs.523302	NM_006793	ENSG00000165672	PRDX3	AOP-1|AOP1|HBC189|MER5|PRO1748|SP-22|prx-III	peroxiredoxin 3	protein-coding
Yap_catlast-only89i_peak_27505	chr9	38017116	38017633	+	375	NA	intron (NM_003028, intron 1 of 5)	intron (NM_003028, intron 1 of 5)	51836	NM_003028	6461	Hs.521482	NM_003028	ENSG00000107338	SHB	bA3J10.2	SH2 domain containing adaptor protein B	protein-coding	SHB
Yap_catlast-only89i_peak_22006	chr5	167722573	167723013	+	375	NA	intron (NM_015238, intron 1 of 22)	intron (NM_015238, intron 1 of 22)	3728	NM_001161662	23286	Hs.484047	NM_015238	ENSG00000113645	WWC1	HBEBP3|HBEBP36|KIBRA|MEMRYQTL|PPP1R168	WW and C2 domain containing 1	protein-coding
Yap_catlast-only89i_peak_15326	chr2	202719111	202719598	+	375	NA	intron (NM_139158, intron 9 of 13)	intron (NM_139158, intron 9 of 13)	48052	NM_001261436	65061	Hs.348711	NM_139158	ENSG00000138395	CDK15	ALS2CR7|PFTAIRE2|PFTK2	cyclin dependent kinase 15	protein-coding
Yap_catlast-only89i_peak_3791	chr10	99334404	99334924	+	374	NA	intron (NM_001346797, intron 1 of 7)	intron (NM_001346797, intron 1 of 7)	2466	NM_020349	26287	Hs.73708	NM_020349	ENSG00000165887	ANKRD2	ARPP	ankyrin repeat domain 2	protein-coding	ANKRD2
Yap_catlast-only89i_peak_11757	chr17	38707388	38707847	+	371	NA	Intergenic	MIR|SINE|MIR	9029	NM_001301718	1236	Hs.370036	NM_001838	ENSG00000126353	CCR7	BLR2|CC-CKR-7|CCR-7|CD197|CDw197|CMKBR7|EBI1	C-C motif chemokine receptor 7	protein-coding
Yap_catlast-only89i_peak_21043	chr5	68746042	68746422	+	371	NA	Intergenic	Intergenic	35207	NR_134279	101928924		NR_134279	ENSG00000249295	LOC101928924	-	uncharacterized LOC101928924	ncRNA
Yap_catlast-only89i_peak_6677	chr12	48214334	48214800	+	371	NA	promoter-TSS (NM_001308090)	promoter-TSS (NM_001308090)	-804	NM_001308090	51564	Hs.200063	NM_015401	ENSG00000061273	HDAC7	HD7|HD7A|HDAC7A	histone deacetylase 7	protein-coding
Yap_catlast-only89i_peak_21935	chr5	158129012	158129795	+	370	NA	intron (NM_182708, intron 14 of 14)	intron (NM_182708, intron 14 of 14)	-292622	NR_109888	101927697	Hs.483960	NR_109888	ENSG00000276778	LOC101927697	-	uncharacterized LOC101927697	ncRNA	LOC101927697
Yap_catlast-only89i_peak_8882	chr14	69044517	69044956	+	370	NA	intron (NM_001321818, intron 10 of 10)	intron (NM_001321818, intron 10 of 10)	50768	NR_135816	100996664		NR_135816		LOC100996664	-	uncharacterized LOC100996664	ncRNA
Yap_catlast-only89i_peak_2847	chr10	25162147	25162576	+	370	NA	intron (NM_020200, intron 3 of 8)	intron (NM_020200, intron 3 of 8)	79212	NM_020200	56952	Hs.405619	NM_020200	ENSG00000099256	PRTFDC1	HHGP	phosphoribosyl transferase domain containing 1	protein-coding	PRTFDC1
Yap_catlast-only89i_peak_28160	chr9	127071879	127072345	+	370	NA	intron (NM_001166167, intron 2 of 9)	intron (NM_001166167, intron 2 of 9)	17413	NM_001166169	10783	Hs.197071	NM_014397	ENSG00000119408	NEK6	SID6-1512	NIMA related kinase 6	protein-coding
Yap_catlast-only89i_peak_21017	chr5	65157379	65158203	+	370	NA	Intergenic	Intergenic	-64591	NM_001253701	55914	Hs.591774	NM_018695	ENSG00000112851	ERBIN	ERBB2IP|HEL-S-78|LAP2	erbb2 interacting protein	protein-coding
Yap_catlast-only89i_peak_8581	chr14	50320472	50320974	+	368	NA	promoter-TSS (NM_001301732)	promoter-TSS (NM_001301732)	-802	NM_001301732	9147	Hs.655964	NM_004713	ENSG00000165525	NEMF	NY-CO-1|SDCCAG1	nuclear export mediator factor	protein-coding
Yap_catlast-only89i_peak_23316	chr6	85362013	85362464	+	367	NA	Intergenic	Intergenic	-36938	NR_125877	102724201	Hs.667523	NR_125875	ENSG00000228290	TBX18-AS1	-	TBX18 antisense RNA 1	ncRNA
Yap_catlast-only89i_peak_10609	chr16	65155786	65156207	+	366	NA	promoter-TSS (NM_001797)	promoter-TSS (NM_001797)	44	NM_001330576	1009	Hs.116471	NM_001797	ENSG00000140937	CDH11	CAD11|CDHOB|OB|OSF-4	cadherin 11	protein-coding
Yap_catlast-only89i_peak_20654	chr5	31988329	31988811	+	366	NA	intron (NM_178140, intron 3 of 24)	MER21C|LTR|ERVL	-52305	NR_036241	100422874		NR_036241	ENSG00000266243	MIR4279	-	microRNA 4279	ncRNA	MIR4279
Yap_catlast-only89i_peak_17973	chr3	52704566	52705152	+	366	NA	intron (NM_181042, intron 4 of 29)	FAM|SINE|Alu	14937	NM_181042	55193	Hs.189920	NM_018165	ENSG00000163939	PBRM1	BAF180|PB1	polybromo 1	protein-coding
Yap_catlast-only89i_peak_13260	chr19	12690900	12691447	+	366	NA	3' UTR (NM_020714, exon 5 of 5)	3' UTR (NM_020714, exon 5 of 5)	-28817	NM_144976	163050	Hs.655615	NM_144976	ENSG00000249709	ZNF564	-	zinc finger protein 564	protein-coding	ZNF564
Yap_catlast-only89i_peak_1552	chr1	115873062	115873808	+	366	NA	intron (NM_002506, intron 1 of 2)	intron (NM_002506, intron 1 of 2)	7422	NM_002506	4803	Hs.2561	NM_002506	ENSG00000134259	NGF	Beta-NGF|HSAN5|NGFB	nerve growth factor	protein-coding	NGF
Yap_catlast-only89i_peak_28115	chr9	124360176	124360656	+	366	NA	intron (NM_032552, intron 1 of 16)	intron (NM_032552, intron 1 of 16)	31035	NM_032552	153090	Hs.522378	NM_032552	ENSG00000136848	DAB2IP	AF9Q34|AIP-1|AIP1|DIP1/2	DAB2 interacting protein	protein-coding	DAB2IP
Yap_catlast-only89i_peak_12914	chr18	60904954	60905757	+	366	NA	intron (NM_000633, intron 2 of 2)	intron (NM_000633, intron 2 of 2)	81258	NM_000633	596	Hs.150749	NM_000633	ENSG00000171791	BCL2	Bcl-2|PPP1R50	BCL2, apoptosis regulator	protein-coding	BCL2
Yap_catlast-only89i_peak_8013	chr13	45288228	45288671	+	366	NA	Intergenic	Intergenic	95317	NR_038433	144817	Hs.585616	NR_038433	ENSG00000235097	LINC00330	NCRNA00330	long intergenic non-protein coding RNA 330	ncRNA	LINC00330
Yap_catlast-only89i_peak_16114	chr20	33983574	33984093	+	364	NA	intron (NM_199487, intron 1 of 8)	AluSz|SINE|Alu	16112	NM_018244	55245	Hs.726290	NM_018244	ENSG00000101019	UQCC1	BFZB|C20orf44|CBP3|UQCC	ubiquinol-cytochrome c reductase complex assembly factor 1	protein-coding	UQCC1
Yap_catlast-only89i_peak_17737	chr3	31045621	31045980	+	364	NA	Intergenic	Intergenic	-109647	NM_207359	339896	Hs.657052	NM_207359	ENSG00000144644	GADL1	ADC|CSADC|HuADC|HuCSADC	glutamate decarboxylase like 1	protein-coding	GADL1
Yap_catlast-only89i_peak_21386	chr5	112417680	112418356	+	364	NA	intron (NM_001085377, intron 11 of 18)	intron (NM_001085377, intron 11 of 18)	105611	NM_001242377	167227	Hs.443875	NM_152624	ENSG00000172795	DCP2	NUDT20	decapping mRNA 2	protein-coding
Yap_catlast-only89i_peak_5883	chr11	116855244	116855726	+	364	NA	intron (NM_025164, intron 1 of 23)	intron (NM_025164, intron 1 of 23)	113646	NM_025164	23387	Hs.167451	NM_025164	ENSG00000160584	SIK3	L19|QSK|SIK-3	SIK family kinase 3	protein-coding	SIK3
Yap_catlast-only89i_peak_13333	chr19	14394669	14395113	+	363	NA	Intergenic	MLT1D|LTR|ERVL-MaLR	-49664	NR_134916	101928845	Hs.531617	NR_134916	ENSG00000267147	LINC01842	-	long intergenic non-protein coding RNA 1842	ncRNA
Yap_catlast-only89i_peak_8323	chr13	111000335	111000705	+	363	NA	intron (NM_001846, intron 3 of 47)	intron (NM_001846, intron 3 of 47)	7215	NR_107040	102465872		NR_107040	ENSG00000276765	MIR8073	hsa-mir-8073	microRNA 8073	ncRNA	MIR8073
Yap_catlast-only89i_peak_8868	chr14	68606898	68607293	+	363	NA	intron (NM_001321809, intron 7 of 11)	intron (NM_001321809, intron 7 of 11)	316786	NM_001321815	5890	Hs.172587	NM_002877	ENSG00000182185	RAD51B	R51H2|RAD51L1|REC2	RAD51 paralog B	protein-coding
Yap_catlast-only89i_peak_6592	chr12	32589870	32590368	+	363	NA	Intergenic	Intergenic	-48787	NM_001330374	121512	Hs.117835	NM_139241	ENSG00000139132	FGD4	CMT4H|FRABP|ZFYVE6	FYVE, RhoGEF and PH domain containing 4	protein-coding
Yap_catlast-only89i_peak_9082	chr14	79064401	79064793	+	363	NA	intron (NM_004796, intron 1 of 16)	intron (NM_004796, intron 1 of 16)	194523	NM_004796	9369	Hs.368307	NM_004796	ENSG00000021645	NRXN3	C14orf60	neurexin 3	protein-coding	NRXN3
Yap_catlast-only89i_peak_6767	chr12	52444826	52445199	+	363	NA	promoter-TSS (NM_002135)	promoter-TSS (NM_002135)	-174	NM_173157	3164	Hs.524430	NM_002135	ENSG00000123358	NR4A1	GFRP1|HMR|N10|NAK-1|NGFIB|NP10|NUR77|TR3	nuclear receptor subfamily 4 group A member 1	protein-coding
Yap_catlast-only89i_peak_12844	chr18	55835449	55835896	+	362	NA	intron (NM_001144964, intron 2 of 30)	intron (NM_001144964, intron 2 of 30)	19107	NM_001144965	23327	Hs.185677	NM_015277	ENSG00000049759	NEDD4L	NEDD4-2|NEDD4.2|PVNH7|RSP5|hNEDD4-2	neural precursor cell expressed, developmentally down-regulated 4-like, E3 ubiquitin protein ligase	protein-coding
Yap_catlast-only89i_peak_3517	chr10	81058706	81059535	+	361	NA	intron (NM_020338, intron 16 of 24)	intron (NM_020338, intron 16 of 24)	-48100	NM_005729	10105	Hs.381072	NM_005729	ENSG00000108179	PPIF	CYP3|CyP-M|Cyp-D|CypD	peptidylprolyl isomerase F	protein-coding	PPIF
Yap_catlast-only89i_peak_6407	chr12	14413560	14413980	+	360	NA	Intergenic	Intergenic	-104796	NM_018179	55729	Hs.504856	NM_018179	ENSG00000171681	ATF7IP	AM|ATF-IP|MCAF|MCAF1|p621	activating transcription factor 7 interacting protein	protein-coding	ATF7IP
Yap_catlast-only89i_peak_28900	chrX	128800164	128800649	+	360	NA	Intergenic	Intergenic	-11473	NM_017413	8862	Hs.303084	NM_017413	ENSG00000171388	APLN	APEL|XNPEP2	apelin	protein-coding	APLN
Yap_catlast-only89i_peak_8542	chr14	38633358	38633663	+	360	NA	Intergenic	AluSx1|SINE|Alu	-43694	NM_001049	6751	Hs.248160	NM_001049	ENSG00000139874	SSTR1	SRIF-2|SS-1-R|SS1-R|SS1R	somatostatin receptor 1	protein-coding	SSTR1
Yap_catlast-only89i_peak_11522	chr17	19861300	19861637	+	359	NA	exon (NM_007202, exon 4 of 15)	exon (NM_007202, exon 4 of 15)	19701	NM_007202	11216	Hs.642676	NM_007202	ENSG00000108599	AKAP10	AKAP-10|D-AKAP-2|D-AKAP2|PRKA10	A-kinase anchoring protein 10	protein-coding	AKAP10
Yap_catlast-only89i_peak_12835	chr18	55480514	55480831	+	359	NA	Intergenic	Intergenic	-10345	NM_005603	5205	Hs.216623	NM_005603	ENSG00000081923	ATP8B1	ATPIC|BRIC|FIC1|ICP1|PFIC|PFIC1	ATPase phospholipid transporting 8B1	protein-coding	ATP8B1
Yap_catlast-only89i_peak_15489	chr2	223823967	223824428	+	358	NA	Intergenic	LTR16A2|LTR|ERVL	-92451	NM_080671	23704	Hs.348522	NM_080671	ENSG00000152049	KCNE4	MIRP3	potassium voltage-gated channel subfamily E regulatory subunit 4	protein-coding	KCNE4
Yap_catlast-only89i_peak_17179	chr22	36025735	36026194	+	358	NA	Intergenic	Intergenic	-6563	NM_203377	4151	Hs.517586	NM_005368	ENSG00000198125	MB	PVALB|myoglobgin	myoglobin	protein-coding
Yap_catlast-only89i_peak_4598	chr11	18334531	18335030	+	358	NA	intron (NM_181508, intron 1 of 21)	LTR23|LTR|ERV1	8941	NM_181508	11234	Hs.437599	NM_007216	ENSG00000110756	HPS5	AIBP63|BLOC2S2	HPS5, biogenesis of lysosomal organelles complex 2 subunit 2	protein-coding
Yap_catlast-only89i_peak_22036	chr5	169215040	169215383	+	358	NA	intron (NM_004946, intron 25 of 51)	intron (NM_004946, intron 25 of 51)	150960	NM_004946	1794	Hs.586174	NM_004946	ENSG00000134516	DOCK2	IMD40	dedicator of cytokinesis 2	protein-coding	DOCK2
Yap_catlast-only89i_peak_6322	chr12	7585822	7586239	+	358	NA	exon (NM_174941, exon 3 of 20)	exon (NM_174941, exon 3 of 20)	10751	NM_174941	283316	Hs.631727	NM_174941	ENSG00000177675	CD163L1	CD163B|M160|SCARI2	CD163 molecule like 1	protein-coding	CD163L1
Yap_catlast-only89i_peak_12857	chr18	56257329	56257736	+	356	NA	intron (NM_052947, intron 3 of 12)	intron (NM_052947, intron 3 of 12)	-10320	NR_132963	106635543		NR_132963		SNORA108	-	small nucleolar RNA, H/ACA box 108	snoRNA
Yap_catlast-only89i_peak_22855	chr6	36544954	36545603	+	356	NA	Intergenic	Intergenic	-16812	NR_036610	6428	Hs.405144	NM_003017	ENSG00000112081	SRSF3	SFRS3|SRp20	serine and arginine rich splicing factor 3	protein-coding
Yap_catlast-only89i_peak_849	chr1	44287586	44288109	+	356	NA	intron (NM_001270460, intron 4 of 10)	intron (NM_001270460, intron 4 of 10)	-16447	NR_106727	102464830		NR_106727	ENSG00000283477	MIR6079	hsa-mir-6079	microRNA 6079	ncRNA	MIR6079
Yap_catlast-only89i_peak_27205	chr9	4137056	4137792	+	356	NA	intron (NM_001042413, intron 2 of 10)	intron (NM_001042413, intron 2 of 10)	14759	NM_152629	169792	Hs.162125	NM_152629	ENSG00000107249	GLIS3	NDH|ZNF515	GLIS family zinc finger 3	protein-coding	GLIS3
Yap_catlast-only89i_peak_9611	chr15	59621750	59622441	+	355	NA	intron (NM_004998, intron 1 of 27)	intron (NM_004998, intron 1 of 27)	42976	NM_004998	4643	Hs.654506	NM_004998	ENSG00000157483	MYO1E	FSGS6|HuncM-IC|MYO1C	myosin IE	protein-coding	MYO1E
Yap_catlast-only89i_peak_19818	chr4	84128886	84129334	+	355	NA	Intergenic	LTR19A|LTR|ERV1	76957	NM_015697	27235	Hs.144304	NM_015697	ENSG00000173085	COQ2	CL640|COQ10D1|MSA1|PHB:PPT	coenzyme Q2, polyprenyltransferase	protein-coding	COQ2
Yap_catlast-only89i_peak_18841	chr3	154788712	154789055	+	355	NA	Intergenic	Intergenic	-8553	NM_000902	4311	Hs.307734	NM_000902	ENSG00000196549	MME	CALLA|CD10|CMT2T|NEP|SCA43|SFE	membrane metalloendopeptidase	protein-coding	MME
Yap_catlast-only89i_peak_26448	chr8	89952218	89952586	+	355	NA	Intergenic	MLT1F2|LTR|ERVL-MaLR	-612685	NM_005941	4325	Hs.492187	NM_005941	ENSG00000156103	MMP16	C8orf57|MMP-X2|MT-MMP2|MT-MMP3|MT3-MMP	matrix metallopeptidase 16	protein-coding	MMP16
Yap_catlast-only89i_peak_19848	chr4	88029122	88029705	+	354	NA	exon (NM_001166693, exon 11 of 21)	exon (NM_001166693, exon 11 of 21)	101260	NM_005935	4299	Hs.480190	NM_005935	ENSG00000172493	AFF1	AF4|MLLT2|PBM1	AF4/FMR2 family member 1	protein-coding	AFF1
Yap_catlast-only89i_peak_15995	chr20	26144554	26144889	+	354	NA	Intergenic	Intergenic	44193	NR_030386	724033		NR_030386	ENSG00000227195	MIR663A	MIR663|MIRN663|hsa-mir-663|hsa-mir-663a|mir-663a	microRNA 663a	ncRNA	MIR663A
Yap_catlast-only89i_peak_8619	chr14	52021066	52021481	+	354	NA	intron (NR_047477, intron 2 of 3)	L1MC3|LINE|L1	45397	NR_051990	100874185	Hs.578226	NR_047477	ENSG00000258537	FRMD6-AS2	-	FRMD6 antisense RNA 2	ncRNA
Yap_catlast-only89i_peak_26203	chr8	49320908	49321542	+	353	NA	Intergenic	Intergenic	-142902	NR_105002	101929268	Hs.683934	NR_105002	ENSG00000253608	LOC101929268	-	uncharacterized LOC101929268	ncRNA	LOC101929268
Yap_catlast-only89i_peak_16283	chr20	43349825	43350358	+	353	NA	intron (NM_001323369, intron 2 of 2)	AluJo|SINE|Alu	6606	NM_001323369	8839	Hs.592145	NM_003881	ENSG00000064205	WISP2	CCN5|CT58|CTGF-L	WNT1 inducible signaling pathway protein 2	protein-coding
Yap_catlast-only89i_peak_21878	chr5	151121193	151121732	+	353	NA	TTS (NM_004045)	TTS (NM_004045)	16748	NM_004045	475	Hs.125213	NM_004045	ENSG00000177556	ATOX1	ATX1|HAH1	antioxidant 1 copper chaperone	protein-coding	ATOX1
Yap_catlast-only89i_peak_12390	chr17	80175459	80176008	+	352	NA	Intergenic	Intergenic	-5028	NM_001316321	284001	Hs.631724	NM_152675	ENSG00000176155	CCDC57	-	coiled-coil domain containing 57	protein-coding
Yap_catlast-only89i_peak_19596	chr4	41145084	41145740	+	352	NA	intron (NM_001166050, intron 1 of 17)	intron (NM_001166050, intron 1 of 17)	71223	NM_001166050	323	Hs.479602	NM_004307	ENSG00000163697	APBB2	FE65L|FE65L1	amyloid beta precursor protein binding family B member 2	protein-coding
Yap_catlast-only89i_peak_11554	chr17	25861131	25861664	+	352	NA	intron (NM_014238, intron 2 of 20)	intron (NM_014238, intron 2 of 20)	62361	NM_014238	8844	Hs.133534	NM_014238	ENSG00000141068	KSR1	KSR|RSU2	kinase suppressor of ras 1	protein-coding	KSR1
Yap_catlast-only89i_peak_27544	chr9	72653008	72653655	+	352	NA	Intergenic	(GAATG)n|Satellite|Satellite	-5166	NM_001347990	256691	Hs.547172	NM_153267	ENSG00000165072	MAMDC2	-	MAM domain containing 2	protein-coding
Yap_catlast-only89i_peak_28257	chr9	131397584	131398169	+	352	NA	intron (NM_052844, intron 5 of 8)	intron (NM_052844, intron 5 of 8)	21253	NM_052844	89891	Hs.495240	NM_052844	ENSG00000119333	WDR34	DIC5|FAP133|SRTD11|bA216B9.3	WD repeat domain 34	protein-coding	WDR34
Yap_catlast-only89i_peak_43	chr1	2253519	2254072	+	352	NA	intron (NM_024848, intron 13 of 13)	CpG	30305	NR_024489	100129534	Hs.655313	NM_001127577	ENSG00000269896	LOC100129534	-	small nuclear ribonucleoprotein polypeptide N pseudogene	pseudo
Yap_catlast-only89i_peak_663	chr1	33168953	33169974	+	351	NA	Intergenic	Intergenic	-1102	NM_030786	81493	Hs.712631	NM_030786	ENSG00000162520	SYNC	SYNC1|SYNCOILIN	syncoilin, intermediate filament protein	protein-coding	SYNC
Yap_catlast-only89i_peak_12498	chr18	8946031	8946496	+	351	NA	Intergenic	L1MB7|LINE|L1	-156365	NM_021074	4729	Hs.464572	NM_021074	ENSG00000178127	NDUFV2	CI-24k	NADH:ubiquinone oxidoreductase core subunit V2	protein-coding	NDUFV2
Yap_catlast-only89i_peak_1962	chr1	183241290	183241803	+	350	NA	intron (NM_170706, intron 8 of 10)	intron (NM_170706, intron 8 of 10)	32463	NM_170706	23057	Hs.497123	NM_015039	ENSG00000157064	NMNAT2	C1orf15|PNAT2	nicotinamide nucleotide adenylyltransferase 2	protein-coding
Yap_catlast-only89i_peak_5572	chr11	85752921	85753240	+	349	NA	intron (NM_001206947, intron 1 of 18)	intron (NM_001206947, intron 1 of 18)	27059	NM_001008660	8301	Hs.163893	NM_007166	ENSG00000073921	PICALM	CALM|CLTH|LAP	phosphatidylinositol binding clathrin assembly protein	protein-coding
Yap_catlast-only89i_peak_25099	chr7	105079806	105080327	+	349	NA	Intergenic	Intergenic	-50689	NM_182692	6733	Hs.285197	NM_182691	ENSG00000135250	SRPK2	SFRSK2	SRSF protein kinase 2	protein-coding
Yap_catlast-only89i_peak_532	chr1	27325735	27326286	+	349	NA	intron (NM_001013642, intron 1 of 1)	intron (NM_001013642, intron 1 of 1)	5815	NM_001013642	388610	Hs.355747	NM_001013642	ENSG00000253368	TRNP1	C1orf225|TNRP	TMF1-regulated nuclear protein 1	protein-coding	TRNP1
Yap_catlast-only89i_peak_16271	chr20	43201583	43202158	+	349	NA	intron (NM_007066, intron 1 of 3)	intron (NM_007066, intron 1 of 3)	-9320	NM_001281445	11142	Hs.472831	NM_007066	ENSG00000168734	PKIG	PKI-gamma	cAMP-dependent protein kinase inhibitor gamma	protein-coding
Yap_catlast-only89i_peak_26286	chr8	61863592	61864014	+	349	NA	Intergenic	Intergenic	16504	NR_034003	100130298	Hs.636194	NR_034003		LOC100130298	-	hCG1816373-like	ncRNA	LOC100130298
Yap_catlast-only89i_peak_28339	chr9	134483928	134484196	+	349	NA	intron (NM_001304275, intron 11 of 23)	intron (NM_001304275, intron 11 of 23)	-77400	NM_001135954	83549	Hs.9597	NM_031432	ENSG00000130717	UCK1	URK1	uridine-cytidine kinase 1	protein-coding
Yap_catlast-only89i_peak_8399	chr14	22764547	22764926	+	348	NA	Intergenic	Intergenic	293407	NM_001344	1603	Hs.82890	NM_001344	ENSG00000129562	DAD1	OST2	defender against cell death 1	protein-coding	DAD1
Yap_catlast-only89i_peak_16457	chr20	49596552	49597062	+	347	NA	Intergenic	Intergenic	21456	NM_014484	27304	Hs.159410	NM_014484	ENSG00000124217	MOCS3	UBA4	molybdenum cofactor synthesis 3	protein-coding	MOCS3
Yap_catlast-only89i_peak_22361	chr6	8180402	8180914	+	347	NA	Intergenic	Intergenic	-77830	NM_004280	9521	Hs.602353	NM_004280	ENSG00000124802	EEF1E1	AIMP3|P18	eukaryotic translation elongation factor 1 epsilon 1	protein-coding	EEF1E1
Yap_catlast-only89i_peak_9587	chr15	57843956	57844333	+	347	NA	Intergenic	Intergenic	-39958	NR_104368	145781	Hs.437256	NM_001018090	ENSG00000137878	GCOM1	GRINL1A|Gcom2|MYZAP|MYZAP-POLR2M|gcom	GRINL1A complex locus 1	protein-coding
Yap_catlast-only89i_peak_10111	chr16	2085536	2085991	+	347	NA	intron (NM_001252076, intron 1 of 5)	intron (NM_001252076, intron 1 of 5)	2498	NM_001252075	9351	Hs.440896	NM_004785	ENSG00000065054	SLC9A3R2	E3KARP|NHE3RF2|NHERF-2|NHERF2|OCTS2|SIP-1|SIP1|TKA-1	SLC9A3 regulator 2	protein-coding
Yap_catlast-only89i_peak_12812	chr18	53374079	53374484	+	346	NA	Intergenic	L1ME2z|LINE|L1	-71057	NM_001243226	6925	Hs.605153	NM_003199	ENSG00000196628	TCF4	E2-2|FECD3|ITF-2|ITF2|PTHS|SEF-2|SEF2|SEF2-1|SEF2-1A|SEF2-1B|SEF2-1D|TCF-4|bHLHb19	transcription factor 4	protein-coding
Yap_catlast-only89i_peak_21796	chr5	148381611	148382086	+	346	NA	3' UTR (NM_024577, exon 17 of 17)	3' UTR (NM_024577, exon 17 of 17)	60889	NM_024577	79628	Hs.483784	NM_024577	ENSG00000169247	SH3TC2	CMT4C|MNMN	SH3 domain and tetratricopeptide repeats 2	protein-coding	SH3TC2
Yap_catlast-only89i_peak_26089	chr8	38517474	38518099	+	346	NA	Intergenic	Intergenic	-59011	NR_003129	286140	Hs.512071	NR_003129		RNF5P1	-	ring finger protein 5 pseudogene 1	pseudo	RNF5P1
Yap_catlast-only89i_peak_16449	chr20	49407176	49407788	+	345	NA	Intergenic	Intergenic	-3949	NM_017843	55653	Hs.381178	NM_017843	ENSG00000124243	BCAS4	CNOL	breast carcinoma amplified sequence 4	protein-coding	BCAS4
Yap_catlast-only89i_peak_17494	chr3	8893326	8893774	+	345	NA	Intergenic	Intergenic	-82250	NM_000916	5021	Hs.2820	NM_000916	ENSG00000180914	OXTR	OT-R	oxytocin receptor	protein-coding	OXTR
Yap_catlast-only89i_peak_3184	chr10	62174549	62174902	+	345	NA	intron (NM_001204403, intron 2 of 43)	intron (NM_001204403, intron 2 of 43)	-24983	NM_001320874	288	Hs.499725	NM_001149	ENSG00000151150	ANK3	ANKYRIN-G|MRT37	ankyrin 3	protein-coding
Yap_catlast-only89i_peak_13584	chr19	40927086	40927508	+	345	NA	Intergenic	CpG	4635	NM_013376	29950	Hs.269898	NM_013376	ENSG00000197019	SERTAD1	SEI1|TRIP-Br1	SERTA domain containing 1	protein-coding	SERTAD1
Yap_catlast-only89i_peak_7541	chr12	116819686	116820184	+	345	NA	Intergenic	Intergenic	46188	NR_039683	100616309		NR_039683	ENSG00000264037	MIR4472-2	-	microRNA 4472-2	ncRNA	MIR4472-2
Yap_catlast-only89i_peak_27890	chr9	111205904	111206383	+	345	NA	Intergenic	Intergenic	412132	NM_006686	10880	Hs.534390	NM_006686	ENSG00000148156	ACTL7B	Tact1	actin like 7B	protein-coding	ACTL7B
Yap_catlast-only89i_peak_984	chr1	55894721	55895325	+	345	NA	Intergenic	Intergenic	203709	NR_039618	100616272		NR_039618	ENSG00000265822	MIR4422	mir-4422	microRNA 4422	ncRNA	MIR4422
Yap_catlast-only89i_peak_4971	chr11	57545863	57546359	+	345	NA	intron (NM_001085467, intron 1 of 16)	intron (NM_001085467, intron 1 of 16)	16877	NM_001085467	1500	Hs.166011	NM_001331	ENSG00000198561	CTNND1	CAS|CTNND|P120CAS|P120CTN|p120|p120(CAS)|p120(CTN)	catenin delta 1	protein-coding
Yap_catlast-only89i_peak_16856	chr21	45020490	45020988	+	345	NA	intron (NM_007031, intron 7 of 8)	intron (NM_007031, intron 7 of 8)	9131	NR_106718	102464825		NR_106718	ENSG00000278433	MIR6070	hsa-mir-6070	microRNA 6070	ncRNA	MIR6070
Yap_catlast-only89i_peak_17771	chr3	36718749	36719302	+	345	NA	Intergenic	Intergenic	62327	NM_033403	85443	Hs.631907	NM_033403	ENSG00000163673	DCLK3	CLR|DCAMKL3|DCDC3C|DCK3	doublecortin like kinase 3	protein-coding	DCLK3
Yap_catlast-only89i_peak_20153	chr4	146656242	146656838	+	344	NA	Intergenic	Intergenic	55184	NM_001080531	646603	Hs.452865	NM_001080531	ENSG00000237136	C4orf51	-	chromosome 4 open reading frame 51	protein-coding	C4orf51
Yap_catlast-only89i_peak_2180	chr1	207180640	207181030	+	344	NA	Intergenic	Intergenic	25266	NM_023938	79098	Hs.32417	NM_023938	ENSG00000182795	C1orf116	SARG	chromosome 1 open reading frame 116	protein-coding	C1orf116
Yap_catlast-only89i_peak_24592	chr7	50504086	50504515	+	344	NA	TTS (NM_001042762)	TTS (NM_001042762)	13804	NM_001287496	63979	Hs.137516	NM_022116	ENSG00000132436	FIGNL1	-	fidgetin like 1	protein-coding
Yap_catlast-only89i_peak_465	chr1	24743445	24743870	+	343	NA	intron (NM_001330409, intron 2 of 12)	intron (NM_001330409, intron 2 of 12)	1142	NM_001322857	57185	Hs.523442	NM_020448	ENSG00000001461	NIPAL3	DJ462O23.2|NPAL3	NIPA like domain containing 3	protein-coding
Yap_catlast-only89i_peak_4833	chr11	44265230	44265595	+	342	NA	intron (NM_001178083, intron 14 of 14)	intron (NM_001178083, intron 14 of 14)	66304	NM_021926	60529	Hs.436055	NM_021926	ENSG00000052850	ALX4	CRS5|FND2	ALX homeobox 4	protein-coding	ALX4
Yap_catlast-only89i_peak_16782	chr21	39221872	39222632	+	342	NA	intron (NM_002240, intron 1 of 3)	L3|LINE|CR1	66489	NM_002240	3763	Hs.626242	NM_002240	ENSG00000157542	KCNJ6	BIR1|GIRK-2|GIRK2|KATP-2|KATP2|KCNJ7|KIR3.2|KPLBS|hiGIRK2	potassium voltage-gated channel subfamily J member 6	protein-coding	KCNJ6
Yap_catlast-only89i_peak_23190	chr6	72114309	72114794	+	342	NA	Intergenic	Intergenic	-1227	NR_029504	407029		NR_029504	ENSG00000207827	MIR30A	MIRN30A|mir-30a	microRNA 30a	ncRNA	MIR30A
Yap_catlast-only89i_peak_19526	chr4	26689260	26689721	+	342	NA	intron (NM_001292054, intron 9 of 17)	intron (NM_001292054, intron 9 of 17)	103944	NM_018317	55296	Hs.479403	NM_018317	ENSG00000109680	TBC1D19	-	TBC1 domain family member 19	protein-coding	TBC1D19
Yap_catlast-only89i_peak_5492	chr11	76288313	76288813	+	342	NA	Intergenic	Intergenic	92481	NM_005512	2615	Hs.151641	NM_005512	ENSG00000137507	LRRC32	D11S833E|GARP	leucine rich repeat containing 32	protein-coding	LRRC32
Yap_catlast-only89i_peak_23322	chr6	86113029	86113803	+	341	NA	intron (NR_134633, intron 2 of 3)	intron (NR_134633, intron 2 of 3)	1104	NR_134633	101928820	Hs.587370	NR_134633	ENSG00000234155	LOC101928820	-	uncharacterized LOC101928820	ncRNA
Yap_catlast-only89i_peak_24449	chr7	39773408	39773960	+	341	NA	intron (NR_026999, intron 1 of 11)	LTR24|LTR|ERV1	517	NR_026999	349114	Hs.414183	NM_198284		LINC00265	NCRNA00265	long intergenic non-protein coding RNA 265	ncRNA
Yap_catlast-only89i_peak_5037	chr11	61655526	61655955	+	341	NA	intron (NM_021727, intron 1 of 11)	intron (NM_021727, intron 1 of 11)	3277	NM_021727	3995	Hs.21765	NM_021727	ENSG00000221968	FADS3	CYB5RP|LLCDL3	fatty acid desaturase 3	protein-coding	FADS3
Yap_catlast-only89i_peak_17006	chr22	26155890	26156247	+	341	NA	intron (NM_001318245, intron 1 of 43)	L1ME3A|LINE|L1	17957	NM_001318245	84700	Hs.417959	NM_032608	ENSG00000133454	MYO18B	KFS4	myosin XVIIIB	protein-coding
Yap_catlast-only89i_peak_9231	chr14	100003739	100004208	+	341	NA	intron (NM_001144995, intron 1 of 5)	intron (NM_001144995, intron 1 of 5)	56234	NM_001099402	8812	Hs.510409	NM_003858	ENSG00000090061	CCNK	CPR4	cyclin K	protein-coding
Yap_catlast-only89i_peak_23277	chr6	81257677	81258001	+	341	NA	Intergenic	Intergenic	441512	NM_001318975	594	Hs.654441	NM_000056	ENSG00000083123	BCKDHB	BCKDE1B|BCKDH E1-beta|E1B	branched chain keto acid dehydrogenase E1 subunit beta	protein-coding
Yap_catlast-only89i_peak_11931	chr17	47099785	47100132	+	341	NA	intron (NM_006546, intron 2 of 14)	intron (NM_006546, intron 2 of 14)	25184	NM_001160423	10642	Hs.144936	NM_006546	ENSG00000159217	IGF2BP1	CRD-BP|CRDBP|IMP-1|IMP1|VICKZ1|ZBP1	insulin like growth factor 2 mRNA binding protein 1	protein-coding
Yap_catlast-only89i_peak_5323	chr11	68890173	68890587	+	341	NA	Intergenic	Intergenic	39736	NR_036122	100422846		NR_036122	ENSG00000265539	MIR3164	-	microRNA 3164	ncRNA	MIR3164
Yap_catlast-only89i_peak_22442	chr6	12573458	12573838	+	341	NA	Intergenic	Intergenic	-143240	NM_001242648	221692	Hs.436996	NM_030948	ENSG00000112137	PHACTR1	RPEL|RPEL1|dJ257A7.2	phosphatase and actin regulator 1	protein-coding
Yap_catlast-only89i_peak_3160	chr10	60198016	60198517	+	341	NA	Intergenic	Intergenic	53363	NM_001270782	7019	Hs.594250	NM_003201	ENSG00000108064	TFAM	MTDPS15|MTTF1|MTTFA|TCF6|TCF6L1|TCF6L2|TCF6L3	transcription factor A, mitochondrial	protein-coding
Yap_catlast-only89i_peak_24462	chr7	41066861	41067362	+	341	NA	Intergenic	Intergenic	-47574	NR_110831	101928744	Hs.639767	NR_110831	ENSG00000232458	LINC01450	-	long intergenic non-protein coding RNA 1450	ncRNA	LINC01450
Yap_catlast-only89i_peak_15964	chr20	24653346	24653749	+	341	NA	Intergenic	MER20|DNA|hAT-Charlie	203105	NM_001323607	79953	Hs.124638	NM_024893	ENSG00000101463	SYNDIG1	C20orf39|DSPC2|IFITMD5|TMEM90B	synapse differentiation inducing 1	protein-coding
Yap_catlast-only89i_peak_18943	chr3	168829923	168830342	+	341	NA	intron (NM_004991, intron 9 of 16)	intron (NM_004991, intron 9 of 16)	33961	NM_001105077	2122	Hs.744090	NM_004991	ENSG00000085276	MECOM	AML1-EVI-1|EVI1|KMT8E|MDS1|MDS1-EVI1|PRDM3|RUSAT2	MDS1 and EVI1 complex locus	protein-coding
Yap_catlast-only89i_peak_17135	chr22	31573278	31573831	+	339	NA	intron (NR_024212, intron 1 of 5)	intron (NR_024212, intron 1 of 5)	17416	NM_152267	91445	Hs.517553	NM_152267	ENSG00000138942	RNF185	-	ring finger protein 185	protein-coding	RNF185
Yap_catlast-only89i_peak_22472	chr6	15285048	15285412	+	339	NA	intron (NM_001267040, intron 1 of 17)	intron (NM_001267040, intron 1 of 17)	36144	NM_001267040	3720	Hs.269059	NM_004973	ENSG00000008083	JARID2	JMJ	jumonji and AT-rich interaction domain containing 2	protein-coding
Yap_catlast-only89i_peak_16575	chr20	62066187	62066645	+	338	NA	intron (NM_172107, intron 7 of 16)	L1MB5|LINE|L1	37614	NM_004518	3785	Hs.161851	NM_004518	ENSG00000075043	KCNQ2	BFNC|EBN|EBN1|ENB1|HNSPC|KCNA11|KV7.2	potassium voltage-gated channel subfamily Q member 2	protein-coding	KCNQ2
Yap_catlast-only89i_peak_4252	chr10	135199346	135199779	+	338	NA	intron (NR_109764, intron 4 of 6)	AluSz6|SINE|Alu	6821	NR_109766	196743	Hs.501578	NM_152911	ENSG00000148832	PAOX	PAO	polyamine oxidase	protein-coding
Yap_catlast-only89i_peak_11690	chr17	35853358	35853840	+	338	NA	intron (NM_007026, intron 1 of 2)	intron (NM_007026, intron 1 of 2)	3648	NM_007026	11072	Hs.91448	NM_007026	ENSG00000276023	DUSP14	MKP-L|MKP6	dual specificity phosphatase 14	protein-coding	DUSP14
Yap_catlast-only89i_peak_2245	chr1	214551383	214551731	+	338	NA	intron (NM_005401, intron 13 of 18)	intron (NM_005401, intron 13 of 18)	96992	NM_020197	56950	Hs.66170	NM_020197	ENSG00000143499	SMYD2	HSKM-B|KMT3C|ZMYND14	SET and MYND domain containing 2	protein-coding	SMYD2
Yap_catlast-only89i_peak_4430	chr11	9787120	9787634	+	337	NA	intron (NR_036485, intron 1 of 2)	intron (NR_036485, intron 1 of 2)	-6297	NR_033972	440028	Hs.677541	NR_033972	ENSG00000245522	LOC440028	-	uncharacterized LOC440028	ncRNA	LOC440028
Yap_catlast-only89i_peak_17213	chr22	36864063	36864464	+	337	NA	intron (NM_012473, intron 3 of 3)	intron (NM_012473, intron 3 of 3)	13424	NM_012473	25828	Hs.211929	NM_012473	ENSG00000100348	TXN2	COXPD29|MT-TRX|MTRX|TRX2	thioredoxin 2	protein-coding	TXN2
Yap_catlast-only89i_peak_10358	chr16	24988878	24989372	+	337	NA	intron (NM_018054, intron 2 of 18)	intron (NM_018054, intron 2 of 18)	37574	NM_001006634	55114	Hs.373793	NM_018054	ENSG00000140750	ARHGAP17	MST066|MST110|MSTP038|MSTP066|MSTP110|NADRIN|PP367|PP4534|RICH-1|RICH1|WBP15	Rho GTPase activating protein 17	protein-coding
Yap_catlast-only89i_peak_27927	chr9	112791583	112792083	+	337	NA	intron (NM_147150, intron 7 of 9)	intron (NM_147150, intron 7 of 9)	-19045	NM_001004065	11217	Hs.591908	NM_001004065	ENSG00000241978	AKAP2	AKAP-2|AKAPKL|MISP2|PRKA2	A-kinase anchoring protein 2	protein-coding	AKAP2
Yap_catlast-only89i_peak_1823	chr1	165742544	165743053	+	337	NA	non-coding (NR_125374, exon 2 of 3)	non-coding (NR_125374, exon 2 of 3)	4632	NR_125374	100147773	Hs.633824	NR_125374		LOC100147773	-	uncharacterized LOC100147773	ncRNA	LOC100147773
Yap_catlast-only89i_peak_15704	chr20	1396672	1396986	+	336	NA	Intergenic	L2c|LINE|L2	-23013	NM_000801	2280	Hs.471933	NM_000801	ENSG00000088832	FKBP1A	FKBP-12|FKBP-1A|FKBP1|FKBP12|PKC12|PKCI2|PPIASE	FK506 binding protein 1A	protein-coding	FKBP1A
Yap_catlast-only89i_peak_22358	chr6	8085286	8085690	+	336	NA	intron (NM_004280, intron 3 of 3)	AluJb|SINE|Alu	1278	NR_003703	100124533		NR_003703		SCARNA27	-	small Cajal body-specific RNA 27	ncRNA	SCARNA27
Yap_catlast-only89i_peak_9713	chr15	66586709	66587284	+	336	NA	intron (NM_001323945, intron 1 of 16)	intron (NM_001323945, intron 1 of 16)	838	NM_001323944	115752	Hs.446251	NM_133375	ENSG00000166938	DIS3L	DIS3L1	DIS3 like exosome 3'-5' exoribonuclease	protein-coding
Yap_catlast-only89i_peak_13342	chr19	15217880	15218396	+	336	NA	promoter-TSS (NM_001300910)	promoter-TSS (NM_001300910)	-37	NM_033025	85360	Hs.528701	NM_033025	ENSG00000105137	SYDE1	7h3|SYD1	synapse defective Rho GTPase homolog 1	protein-coding	SYDE1
Yap_catlast-only89i_peak_23445	chr6	107922122	107922591	+	335	NA	intron (NM_018013, intron 5 of 6)	intron (NM_018013, intron 5 of 6)	111039	NM_018013	55084	Hs.445244	NM_018013	ENSG00000112320	SOBP	JXC1|MRAMS	sine oculis binding protein homolog	protein-coding	SOBP
Yap_catlast-only89i_peak_4434	chr11	9927559	9927919	+	335	NA	intron (NM_030962, intron 16 of 39)	intron (NM_030962, intron 16 of 39)	67050	NR_120539	101928008	Hs.585524	NR_120539	ENSG00000255476	LOC101928008	-	uncharacterized LOC101928008	ncRNA	LOC101928008
Yap_catlast-only89i_peak_15622	chr2	235889930	235890524	+	335	NA	intron (NM_014521, intron 1 of 5)	intron (NM_014521, intron 1 of 5)	29599	NM_014521	23677	Hs.516777	NM_014521	ENSG00000130147	SH3BP4	BOG25|TTP	SH3 domain binding protein 4	protein-coding	SH3BP4
Yap_catlast-only89i_peak_18222	chr3	99132311	99132746	+	335	NA	Intergenic	Intergenic	-224912	NM_020351	1295	Hs.654548	NM_001850	ENSG00000144810	COL8A1	C3orf7	collagen type VIII alpha 1 chain	protein-coding
Yap_catlast-only89i_peak_28236	chr9	130860913	130861478	+	335	NA	intron (NR_049766, intron 1 of 9)	intron (NR_049766, intron 1 of 9)	434	NM_052901	114789	Hs.5476	NM_052901	ENSG00000148339	SLC25A25	MCSC|PCSCL|SCAMC-2	solute carrier family 25 member 25	protein-coding	SLC25A25
Yap_catlast-only89i_peak_20928	chr5	53996965	53997466	+	335	NA	intron (NR_104658, intron 1 of 2)	intron (NR_104658, intron 1 of 2)	1937	NR_104659	102467080	Hs.637409	NR_104658		LOC102467080	-	uncharacterized LOC102467080	ncRNA
Yap_catlast-only89i_peak_11758	chr17	38708080	38708635	+	335	NA	Intergenic	Intergenic	8289	NM_001301718	1236	Hs.370036	NM_001838	ENSG00000126353	CCR7	BLR2|CC-CKR-7|CCR-7|CD197|CDw197|CMKBR7|EBI1	C-C motif chemokine receptor 7	protein-coding
Yap_catlast-only89i_peak_1726	chr1	155436794	155437226	+	335	NA	intron (NM_018489, intron 3 of 27)	intron (NM_018489, intron 3 of 27)	34039	NR_034180	645682	Hs.632482	NR_034180	ENSG00000237872	POU5F1P4	Oct4-pg4|POU5FLC1	POU class 5 homeobox 1 pseudogene 4	pseudo	POU5F1P4
Yap_catlast-only89i_peak_10564	chr16	57661317	57661895	+	335	NA	promoter-TSS (NM_201525)	promoter-TSS (NM_201525)	-532	NM_201525	9289	Hs.513633	NM_005682	ENSG00000205336	ADGRG1	BFPP|BPPR|GPR56|TM7LN4|TM7XN1	adhesion G protein-coupled receptor G1	protein-coding
Yap_catlast-only89i_peak_6917	chr12	56987761	56988347	+	335	NA	3' UTR (NM_002898, exon 14 of 14)	3' UTR (NM_002898, exon 14 of 14)	36061	NM_001300905	11176	Hs.314263	NM_013449	ENSG00000076108	BAZ2A	TIP5|WALp3	bromodomain adjacent to zinc finger domain 2A	protein-coding
Yap_catlast-only89i_peak_20988	chr5	60597571	60597936	+	334	NA	Intergenic	Intergenic	-30347	NM_020928	57688	Hs.744939	NM_020928	ENSG00000130449	ZSWIM6	AFND	zinc finger SWIM-type containing 6	protein-coding	ZSWIM6
Yap_catlast-only89i_peak_3741	chr10	96157326	96157960	+	334	NA	Intergenic	Intergenic	-4543	NM_015188	23232	Hs.500598	NM_015188	ENSG00000108239	TBC1D12	-	TBC1 domain family member 12	protein-coding	TBC1D12
Yap_catlast-only89i_peak_6980	chr12	63439043	63439509	+	334	NA	Intergenic	Intergenic	107314	NM_000706	552	Hs.2131	NM_000706	ENSG00000166148	AVPR1A	AVPR V1a|AVPR1|V1aR	arginine vasopressin receptor 1A	protein-coding	AVPR1A
Yap_catlast-only89i_peak_26155	chr8	42349919	42350338	+	333	NA	intron (NM_006749, intron 1 of 10)	intron (NM_006749, intron 1 of 10)	8850	NM_001257180	6575	Hs.653173	NM_006749	ENSG00000168575	SLC20A2	GLVR-2|GLVR2|IBGC1|IBGC3|MLVAR|PIT-2|PIT2|RAM1|Ram-1	solute carrier family 20 member 2	protein-coding
Yap_catlast-only89i_peak_24603	chr7	51113351	51113733	+	333	NA	intron (NM_015198, intron 7 of 12)	intron (NM_015198, intron 7 of 12)	-252383	NM_001001555	2887	Hs.164060	NM_005311	ENSG00000106070	GRB10	GRB-IR|Grb-10|IRBP|MEG1|RSS	growth factor receptor bound protein 10	protein-coding
Yap_catlast-only89i_peak_308	chr1	17516427	17516795	+	333	NA	Intergenic	Intergenic	-15010	NM_013358	29943	Hs.412941	NM_013358	ENSG00000142623	PADI1	HPAD10|PAD1|PDI|PDI1	peptidyl arginine deiminase 1	protein-coding	PADI1
Yap_catlast-only89i_peak_21102	chr5	73234444	73234806	+	333	NA	intron (NM_001080479, intron 36 of 36)	intron (NM_001080479, intron 36 of 36)	125282	NM_001244364	64283	Hs.482521	NM_001080479	ENSG00000214944	ARHGEF28	RGNEF|RIP2|p190RHOGEF	Rho guanine nucleotide exchange factor 28	protein-coding
Yap_catlast-only89i_peak_19444	chr4	15691908	15692452	+	333	NA	TTS (NM_001145191)	TTS (NM_001145191)	8828	NM_001145191	285550	Hs.399980	NM_001145191	ENSG00000237765	FAM200B	-	family with sequence similarity 200 member B	protein-coding	FAM200B
Yap_catlast-only89i_peak_2757	chr10	17554482	17555142	+	332	NA	Intergenic	MIR|SINE|MIR	-58426	NM_001004470	338596	Hs.677766	NM_001004470	ENSG00000148488	ST8SIA6	SIA8F|SIAT8-F|SIAT8F|ST8SIA-VI|ST8SiaVI	ST8 alpha-N-acetyl-neuraminide alpha-2,8-sialyltransferase 6	protein-coding	ST8SIA6
Yap_catlast-only89i_peak_12824	chr18	54491227	54491547	+	332	NA	intron (NM_052834, intron 19 of 26)	L2c|LINE|L2	172771	NM_052834	23335	Hs.465213	NM_015285	ENSG00000091157	WDR7	TRAG	WD repeat domain 7	protein-coding
Yap_catlast-only89i_peak_4587	chr11	17192834	17193451	+	332	NA	intron (NM_002645, intron 1 of 32)	intron (NM_002645, intron 1 of 32)	36401	NM_001321378	5286	Hs.175343	NM_002645	ENSG00000011405	PIK3C2A	CPK|PI3-K-C2(ALPHA)|PI3-K-C2A|PI3K-C2-alpha|PI3K-C2alpha	phosphatidylinositol-4-phosphate 3-kinase catalytic subunit type 2 alpha	protein-coding
Yap_catlast-only89i_peak_3651	chr10	92680813	92681414	+	332	NA	promoter-TSS (NM_014391)	promoter-TSS (NM_014391)	-81	NM_014391	27063	Hs.448589	NM_014391	ENSG00000148677	ANKRD1	ALRP|C-193|CARP|CVARP|MCARP|bA320F15.2	ankyrin repeat domain 1	protein-coding	ANKRD1
Yap_catlast-only89i_peak_3706	chr10	95218406	95218987	+	331	NA	intron (NM_013451, intron 1 of 53)	intron (NM_013451, intron 1 of 53)	23378	NM_133337	26509	Hs.602086	NM_013451	ENSG00000138119	MYOF	FER1L3	myoferlin	protein-coding
Yap_catlast-only89i_peak_4857	chr11	45168233	45168813	+	331	NA	promoter-TSS (NM_001256695)	promoter-TSS (NM_001256695)	-371	NM_001256696	56981	Hs.178715	NM_020229	ENSG00000019485	PRDM11	PFM8	PR/SET domain 11	protein-coding
Yap_catlast-only89i_peak_5006	chr11	60920742	60921199	+	331	NA	intron (NM_017966, intron 1 of 4)	intron (NM_017966, intron 1 of 4)	7946	NM_017966	55048	Hs.523715	NM_017966	ENSG00000167987	VPS37C	-	VPS37C, ESCRT-I subunit	protein-coding	VPS37C
Yap_catlast-only89i_peak_3808	chr10	100029012	100029599	+	331	NA	Intergenic	Intergenic	-1298	NM_032211	84171	Hs.306814	NM_032211	ENSG00000138131	LOXL4	LOXC	lysyl oxidase like 4	protein-coding	LOXL4
Yap_catlast-only89i_peak_4765	chr11	35512946	35513428	+	331	NA	intron (NM_001282675, intron 5 of 12)	intron (NM_001282675, intron 5 of 12)	34392	NM_015430	25891	Hs.55044	NM_015430	ENSG00000149090	PAMR1	DKFZP586H2123|FP938|RAMP	peptidase domain containing associated with muscle regeneration 1	protein-coding	PAMR1
Yap_catlast-only89i_peak_17772	chr3	36755755	36756163	+	331	NA	3' UTR (NM_033403, exon 5 of 5)	3' UTR (NM_033403, exon 5 of 5)	25393	NM_033403	85443	Hs.631907	NM_033403	ENSG00000163673	DCLK3	CLR|DCAMKL3|DCDC3C|DCK3	doublecortin like kinase 3	protein-coding	DCLK3
Yap_catlast-only89i_peak_22507	chr6	17278824	17279349	+	331	NA	Intergenic	Intergenic	-2723	NM_001143942	221662	Hs.519904	NM_153020	ENSG00000112183	RBM24	RNPC6|dJ259A10.1	RNA binding motif protein 24	protein-coding
Yap_catlast-only89i_peak_683	chr1	33875540	33876120	+	330	NA	Intergenic	Intergenic	-34636	NM_198040	1912	Hs.524271	NM_004427	ENSG00000134686	PHC2	EDR2|HPH2|PH2	polyhomeotic homolog 2	protein-coding
Yap_catlast-only89i_peak_28086	chr9	121405440	121405822	+	330	NA	Intergenic	Intergenic	726108	NM_014618	1620	Hs.532316	NM_014618	ENSG00000078725	BRINP1	DBC1|DBCCR1|FAM5A	BMP/retinoic acid inducible neural specific 1	protein-coding	BRINP1
Yap_catlast-only89i_peak_12231	chr17	72209418	72209782	+	330	NA	promoter-TSS (NR_026914)	promoter-TSS (NR_026914)	-96	NM_032646	94015	Hs.27935	NM_032646	ENSG00000141540	TTYH2	C17orf29	tweety family member 2	protein-coding	TTYH2
Yap_catlast-only89i_peak_500	chr1	26658242	26658446	+	330	NA	intron (NM_001039775, intron 14 of 19)	L1MC4a|LINE|L1	-13588	NM_145345	91544	Hs.145061	NM_145345	ENSG00000158062	UBXN11	COA-1|PP2243|SOC|SOCI|UBXD5	UBX domain protein 11	protein-coding	UBXN11
Yap_catlast-only89i_peak_14767	chr2	111985340	111985731	+	330	NA	intron (NR_015395, intron 5 of 6)	intron (NR_015395, intron 5 of 6)	93128	NR_039636	100616341		NR_039636	ENSG00000266139	MIR4435-2	mir-4435-2	microRNA 4435-2	ncRNA	MIR4435-2
Yap_catlast-only89i_peak_911	chr1	48035475	48035884	+	330	NA	Intergenic	MIRb|SINE|MIR	-132690	NR_126355	102724077	Hs.159718	NR_126355		LINC01389	-	long intergenic non-protein coding RNA 1389	ncRNA	LINC01389
Yap_catlast-only89i_peak_28673	chrX	48345517	48346255	+	329	NA	Intergenic	Intergenic	11477	NM_177439	24140	Hs.23170	NM_012280	ENSG00000068438	FTSJ1	CDLIV|JM23|MRX44|MRX9|SPB1|TRMT7	FtsJ RNA methyltransferase homolog 1 (E. coli)	protein-coding
Yap_catlast-only89i_peak_6795	chr12	53320958	53321385	+	329	NA	promoter-TSS (NM_001256282)	promoter-TSS (NM_001256282)	-918	NM_001256282	3856	Hs.533782	NM_002273	ENSG00000170421	KRT8	CARD2|CK-8|CK8|CYK8|K2C8|K8|KO	keratin 8	protein-coding
Yap_catlast-only89i_peak_15261	chr2	196477408	196477876	+	329	NA	Intergenic	Intergenic	-43890	NM_001127257	57181	Hs.650158	NM_020342	ENSG00000196950	SLC39A10	LZT-Hs2	solute carrier family 39 member 10	protein-coding
Yap_catlast-only89i_peak_3051	chr10	44341522	44341978	+	328	NA	intron (NR_033923, intron 2 of 2)	intron (NR_033923, intron 2 of 2)	996	NR_033923	414260	Hs.351856	NR_033923	ENSG00000204187	LINC00619	C10orf136|bA168P8.1	long intergenic non-protein coding RNA 619	ncRNA	LINC00619
Yap_catlast-only89i_peak_23197	chr6	72253834	72254217	+	328	NA	Intergenic	Intergenic	123295	NR_121615	102724000	Hs.145785	NR_121615		LINC01626	-	long intergenic non-protein coding RNA 1626	ncRNA
Yap_catlast-only89i_peak_11053	chr16	88365448	88366179	+	327	NA	Intergenic	Intergenic	-128066	NM_001127464	84627	Hs.54925	NM_001127464	ENSG00000225614	ZNF469	BCS|BCS1	zinc finger protein 469	protein-coding	ZNF469
Yap_catlast-only89i_peak_16537	chr20	57147199	57147499	+	327	NA	intron (NR_034147, intron 6 of 6)	intron (NR_034147, intron 6 of 6)	56914	NR_034147	149773	Hs.685214	NR_034147	ENSG00000231290	APCDD1L-AS1	-	APCDD1L antisense RNA 1 (head to head)	ncRNA	APCDD1L-AS1
Yap_catlast-only89i_peak_8351	chr13	113832355	113832878	+	327	NA	intron (NM_018386, intron 13 of 14)	intron (NM_018386, intron 13 of 14)	19648	NM_001256134	8858	Hs.1011	NM_003891	ENSG00000126231	PROZ	PZ	protein Z, vitamin K dependent plasma glycoprotein	protein-coding
Yap_catlast-only89i_peak_7346	chr12	102960968	102961355	+	327	NA	Intergenic	L2c|LINE|L2	-86738	NM_001111283	3479	Hs.160562	NM_000618	ENSG00000017427	IGF1	IGF-I|IGFI|MGF	insulin like growth factor 1	protein-coding
Yap_catlast-only89i_peak_13146	chr19	7462623	7463167	+	327	NA	intron (NM_015318, intron 1 of 20)	L1MA8|LINE|L1	2896	NM_015318	23370	Hs.465761	NM_015318	ENSG00000104880	ARHGEF18	P114-RhoGEF	Rho/Rac guanine nucleotide exchange factor 18	protein-coding	ARHGEF18
Yap_catlast-only89i_peak_17042	chr22	27511732	27512184	+	327	NA	Intergenic	MER119|DNA|hAT-Charlie	-55478	NM_001318329	284898	Hs.350813	NM_001318329		LOC284898	-	uncharacterized LOC284898	protein-coding
Yap_catlast-only89i_peak_16131	chr20	34411913	34412359	+	327	NA	intron (NM_016436, intron 2 of 17)	L1ME1|LINE|L1	52213	NM_016436	51230	Hs.517044	NM_016436	ENSG00000025293	PHF20	C20orf104|GLEA2|HCA58|NZF|TDRD20A|TZP	PHD finger protein 20	protein-coding	PHF20
Yap_catlast-only89i_peak_16224	chr20	39806119	39806575	+	327	NA	TTS (NM_015035)	TTS (NM_015035)	8684	NR_106931	102466912		NR_106931	ENSG00000276169	MIR6871	hsa-mir-6871	microRNA 6871	ncRNA	MIR6871
Yap_catlast-only89i_peak_23694	chr6	133952580	133952900	+	327	NA	intron (NR_109982, intron 4 of 8)	intron (NR_109982, intron 4 of 8)	-189545	NR_027030	154089	Hs.126165	NR_027030		LINC01312	-	long intergenic non-protein coding RNA 1312	ncRNA	LINC01312
Yap_catlast-only89i_peak_17264	chr22	38634787	38635438	+	327	NA	intron (NM_012264, intron 3 of 8)	intron (NM_012264, intron 3 of 8)	-14385	NR_132774	106635525		NR_132774		SNORA92	-	small nucleolar RNA, H/ACA box 92	snoRNA
Yap_catlast-only89i_peak_7005	chr12	65672356	65672600	+	326	NA	promoter-TSS (NM_001031679)	promoter-TSS (NM_001031679)	55	NM_001031679	253827	Hs.339024	NM_198080	ENSG00000174099	MSRB3	DFNB74	methionine sulfoxide reductase B3	protein-coding
Yap_catlast-only89i_peak_8622	chr14	52070693	52071259	+	326	NA	intron (NM_001042481, intron 2 of 14)	L2c|LINE|L2	-4306	NR_047477	100874185	Hs.578226	NR_047477	ENSG00000258537	FRMD6-AS2	-	FRMD6 antisense RNA 2	ncRNA	FRMD6-AS2
Yap_catlast-only89i_peak_28882	chrX	118897160	118897505	+	326	NA	Intergenic	Intergenic	4756	NM_001105576	347454	Hs.355223	NM_001105576	ENSG00000187808	SOWAHD	ANKRD58	sosondowah ankyrin repeat domain family member D	protein-coding	SOWAHD
Yap_catlast-only89i_peak_18911	chr3	160168567	160169209	+	326	NA	Intergenic	LTR24|LTR|ERV1	-1262	NM_173084	286827	Hs.212957	NM_173084	ENSG00000213186	TRIM59	IFT80L|MRF1|RNF104|TRIM57|TSBF1	tripartite motif containing 59	protein-coding	TRIM59
Yap_catlast-only89i_peak_6093	chr11	128387470	128388107	+	325	NA	intron (NM_001143820, intron 3 of 9)	intron (NM_001143820, intron 3 of 9)	4417	NM_005238	2113	Hs.369438	NM_005238	ENSG00000134954	ETS1	ETS-1|EWSR2|c-ets-1|p54	ETS proto-oncogene 1, transcription factor	protein-coding	ETS1
Yap_catlast-only89i_peak_9737	chr15	67372856	67373285	+	325	NA	intron (NM_005902, intron 1 of 8)	intron (NM_005902, intron 1 of 8)	14875	NM_005902	4088	Hs.727986	NM_005902	ENSG00000166949	SMAD3	HSPC193|HsT17436|JV15-2|LDS1C|LDS3|MADH3	SMAD family member 3	protein-coding	SMAD3
Yap_catlast-only89i_peak_4310	chr11	1848239	1848815	+	325	NA	Intergenic	Intergenic	-7013	NM_001290334	90019	Hs.161031	NM_138567	ENSG00000149043	SYT8	-	synaptotagmin 8	protein-coding
Yap_catlast-only89i_peak_16644	chr21	28795389	28795771	+	325	NA	Intergenic	Intergenic	-299118	NR_024357	54088	Hs.570434	NR_024357	ENSG00000225298	LINC00113	C21orf23|NCRNA00113	long intergenic non-protein coding RNA 113	ncRNA	LINC00113
Yap_catlast-only89i_peak_16494	chr20	52390279	52390907	+	325	NA	Intergenic	Intergenic	101655	NR_002189	391257	Hs.449977	NR_002189		SUMO1P1	PIC1L|UBL2|UBL6	SUMO1 pseudogene 1	pseudo	SUMO1P1
Yap_catlast-only89i_peak_25908	chr8	26308500	26309271	+	325	NA	Intergenic	Intergenic	60979	NM_001330491	665	Hs.131226	NM_004331	ENSG00000104765	BNIP3L	BNIP3a|NIX	BCL2 interacting protein 3 like	protein-coding
Yap_catlast-only89i_peak_10982	chr16	86642640	86643143	+	325	NA	Intergenic	MER113|DNA|hAT-Charlie	30776	NM_005250	2300	Hs.533830	NM_005250	ENSG00000176678	FOXL1	FKH6|FKHL11|FREAC7	forkhead box L1	protein-coding	FOXL1
Yap_catlast-only89i_peak_9285	chr14	102783095	102783556	+	325	NA	promoter-TSS (NM_001267827)	promoter-TSS (NM_001267827)	-389	NM_001267827	55778	Hs.743359	NM_018335	ENSG00000022976	ZNF839	C14orf131	zinc finger protein 839	protein-coding
Yap_catlast-only89i_peak_17854	chr3	45677054	45677626	+	325	NA	intron (NM_014240, intron 1 of 7)	intron (NM_014240, intron 1 of 7)	41017	NM_014240	8994	Hs.193370	NM_014240	ENSG00000144791	LIMD1	-	LIM domains containing 1	protein-coding	LIMD1
Yap_catlast-only89i_peak_21261	chr5	94449193	94449586	+	325	NA	intron (NM_024717, intron 1 of 22)	L1MA3|LINE|L1	-31819	NM_001002796	79772	Hs.591248	NM_024717	ENSG00000175471	MCTP1	-	multiple C2 and transmembrane domain containing 1	protein-coding
Yap_catlast-only89i_peak_16963	chr22	21391795	21392413	+	325	NA	Intergenic	LTR24|LTR|ERV1	-3543	NR_030379	693234		NR_030379	ENSG00000207575	MIR649	MIRN649|hsa-mir-649	microRNA 649	ncRNA	MIR649
Yap_catlast-only89i_peak_6596	chr12	32830711	32831169	+	325	NA	Intergenic	AluSx1|SINE|Alu	-1194	NM_001330380	10059	Hs.556296	NM_005690	ENSG00000087470	DNM1L	DLP1|DRP1|DVLP|DYMPLE|EMPF|EMPF1|HDYNIV	dynamin 1 like	protein-coding
Yap_catlast-only89i_peak_27875	chr9	109561346	109561845	+	324	NA	Intergenic	Intergenic	-63783	NM_001347997	58499	Hs.370379	NM_021224	ENSG00000148143	ZNF462	Zfp462	zinc finger protein 462	protein-coding
Yap_catlast-only89i_peak_9360	chr15	31316594	31317076	+	324	NA	intron (NM_002420, intron 26 of 26)	intron (NM_002420, intron 26 of 26)	-33028	NM_017762	54893	Hs.30141	NM_017762	ENSG00000166912	MTMR10	-	myotubularin related protein 10	protein-coding	MTMR10
Yap_catlast-only89i_peak_20487	chr5	9621487	9621973	+	324	NA	Intergenic	Intergenic	8733	NM_019599	50834	Hs.567492	NM_019599	ENSG00000169777	TAS2R1	T2R1|TRB7	taste 2 receptor member 1	protein-coding	TAS2R1
Yap_catlast-only89i_peak_20770	chr5	37272706	37273142	+	324	NA	Intergenic	LTR40c|LTR|ERVL	-23394	NM_023073	65250	Hs.586199	NM_023073	ENSG00000197603	C5orf42	Hug|JBTS17|OFD6	chromosome 5 open reading frame 42	protein-coding	C5orf42
Yap_catlast-only89i_peak_12769	chr18	46149607	46150180	+	324	NA	intron (NM_014772, intron 2 of 11)	intron (NM_014772, intron 2 of 11)	-47078	NR_039897	100616366		NR_039897	ENSG00000266276	MIR4743	-	microRNA 4743	ncRNA	MIR4743
Yap_catlast-only89i_peak_5903	chr11	118306805	118307153	+	324	NA	promoter-TSS (NM_005933)	promoter-TSS (NM_005933)	-226	NM_001197104	4297	Hs.258855	NM_005933	ENSG00000118058	KMT2A	ALL-1|CXXC7|HRX|HTRX1|MLL|MLL-AF9|MLL/GAS7|MLL1|MLL1A|TET1-MLL|TRX1|WDSTS	lysine methyltransferase 2A	protein-coding
Yap_catlast-only89i_peak_23994	chr7	1577341	1578044	+	324	NA	intron (NM_002360, intron 1 of 2)	intron (NM_002360, intron 1 of 2)	7324	NM_002360	7975	Hs.520612	NM_002360	ENSG00000198517	MAFK	NFE2U|P18	MAF bZIP transcription factor K	protein-coding	MAFK
Yap_catlast-only89i_peak_3926	chr10	104990766	104991372	+	324	NA	Intergenic	Intergenic	-14575	NM_001143909	729020	Hs.458437	NM_001143909	ENSG00000235376	RPEL1	-	ribulose-5-phosphate-3-epimerase like 1	protein-coding	RPEL1
Yap_catlast-only89i_peak_3718	chr10	95506669	95507087	+	324	NA	Intergenic	Intergenic	-10688	NM_001308275	9211	Hs.533670	NM_005097	ENSG00000108231	LGI1	ADLTE|ADPAEF|ADPEAF|EPITEMPIN|EPT|ETL1|IB1099	leucine rich glioma inactivated 1	protein-coding
Yap_catlast-only89i_peak_4758	chr11	35236154	35236626	+	324	NA	intron (NM_001202555, intron 6 of 9)	intron (NM_001202555, intron 6 of 9)	75973	NM_001202556	960	Hs.502328	NM_000610	ENSG00000026508	CD44	CDW44|CSPG8|ECMR-III|HCELL|HUTCH-I|IN|LHR|MC56|MDU2|MDU3|MIC4|Pgp1	CD44 molecule (Indian blood group)	protein-coding
Yap_catlast-only89i_peak_7849	chr13	30565505	30565760	+	323	NA	Intergenic	Intergenic	54964	NR_033889	440131	Hs.132371	NM_001010918		LINC00544	-	long intergenic non-protein coding RNA 544	ncRNA
Yap_catlast-only89i_peak_24433	chr7	37071214	37071907	+	323	NA	intron (NM_001206482, intron 15 of 21)	intron (NM_001206482, intron 15 of 21)	34159	NR_104120	100861514	Hs.627775	NR_104120	ENSG00000224101	ELMO1-AS1	-	ELMO1 antisense RNA 1	ncRNA	ELMO1-AS1
Yap_catlast-only89i_peak_18446	chr3	124781865	124782410	+	323	NA	Intergenic	Intergenic	-7335	NM_020733	57493	Hs.477420	NM_020733	ENSG00000173706	HEG1	HEG|MST112|MSTP112	heart development protein with EGF like domains 1	protein-coding	HEG1
Yap_catlast-only89i_peak_8697	chr14	56023954	56024328	+	323	NA	Intergenic	Intergenic	22669	NR_027123	100129075	Hs.633724	NR_027123	ENSG00000186615	KTN1-AS1	C14orf33|MYCLo-3	KTN1 antisense RNA 1	ncRNA	KTN1-AS1
Yap_catlast-only89i_peak_8626	chr14	52104996	52105417	+	323	NA	intron (NM_001042481, intron 2 of 14)	intron (NM_001042481, intron 2 of 14)	13256	NR_037676	145438	Hs.645410	NR_037676	ENSG00000273888	FRMD6-AS1	C14orf82	FRMD6 antisense RNA 1	ncRNA	FRMD6-AS1
Yap_catlast-only89i_peak_15314	chr2	202014480	202014909	+	322	NA	intron (NM_001127183, intron 8 of 9)	AluJb|SINE|Alu	7821	NR_040030	65072	Hs.664613	NR_040030	ENSG00000226312	CFLAR-AS1	ALS2CR10	CFLAR antisense RNA 1	ncRNA	CFLAR-AS1
Yap_catlast-only89i_peak_23846	chr6	150176180	150176679	+	322	NA	intron (NM_032832, intron 1 of 6)	PABL_B|LTR|ERV1	-8205	NR_045126	100652739	Hs.642734	NR_045126	ENSG00000223701	RAET1E-AS1	RAET1G-AS1	RAET1E antisense RNA 1	ncRNA	RAET1E-AS1
Yap_catlast-only89i_peak_27868	chr9	107889400	107889883	+	322	NA	Intergenic	AluSc|SINE|Alu	-117245	NM_001330731	23446	Hs.573495	NM_022109	ENSG00000070214	SLC44A1	CD92|CDW92|CHTL1|CTL1	solute carrier family 44 member 1	protein-coding
Yap_catlast-only89i_peak_524	chr1	27099184	27099639	+	322	NA	exon (NM_006015, exon 14 of 20)	exon (NM_006015, exon 14 of 20)	-15043	NM_017837	55650	Hs.259605	NM_017837	ENSG00000060642	PIGV	GPI-MT-II|HPMRS1|PIG-V	phosphatidylinositol glycan anchor biosynthesis class V	protein-coding	PIGV
Yap_catlast-only89i_peak_1668	chr1	151167736	151168301	+	321	NA	Intergenic	Intergenic	-3002	NM_001330689	8394	Hs.655131	NM_003557	ENSG00000143398	PIP5K1A	-	phosphatidylinositol-4-phosphate 5-kinase type 1 alpha	protein-coding
Yap_catlast-only89i_peak_15909	chr20	19414071	19414406	+	321	NA	intron (NM_020689, intron 2 of 16)	intron (NM_020689, intron 2 of 16)	-148998	NR_024564	100130264	Hs.683814	NR_024564	ENSG00000179447	LOC100130264	-	uncharacterized LOC100130264	ncRNA	LOC100130264
Yap_catlast-only89i_peak_18058	chr3	63934682	63934981	+	321	NA	intron (NM_000333, intron 4 of 12)	intron (NM_000333, intron 4 of 12)	-18589	NM_001128149	6314	Hs.476595	NM_000333	ENSG00000163635	ATXN7	ADCAII|OPCA3|SCA7	ataxin 7	protein-coding
Yap_catlast-only89i_peak_6541	chr12	27856607	27856960	+	320	NA	Intergenic	Intergenic	-6923	NM_021821	60488	Hs.714076	NM_021821	ENSG00000061794	MRPS35	HDCMD11P|MDS023|MRP-S28|MRPS28	mitochondrial ribosomal protein S35	protein-coding	MRPS35
Yap_catlast-only89i_peak_13500	chr19	36001125	36001667	+	319	NA	promoter-TSS (NR_033746)	promoter-TSS (NR_033746)	-5	NM_001126059	93099	Hs.417795	NM_033317	ENSG00000161249	DMKN	UNQ729|ZD52F10	dermokine	protein-coding
Yap_catlast-only89i_peak_12712	chr18	39520402	39520921	+	319	NA	Intergenic	Intergenic	-14502	NM_002647	5289	Hs.464971	NM_002647	ENSG00000078142	PIK3C3	VPS34|Vps34|hVps34	phosphatidylinositol 3-kinase catalytic subunit type 3	protein-coding	PIK3C3
Yap_catlast-only89i_peak_22135	chr5	175236738	175237333	+	319	NA	intron (NM_006650, intron 2 of 4)	intron (NM_006650, intron 2 of 4)	13425	NM_006650	10814	Hs.193235	NM_006650	ENSG00000145920	CPLX2	921-L|CPX-2|CPX2|Hfb1	complexin 2	protein-coding	CPLX2
Yap_catlast-only89i_peak_7084	chr12	69809466	69809921	+	319	NA	Intergenic	Intergenic	-54436	NM_001278354	10818	Hs.593446	NM_006654	ENSG00000166225	FRS2	FRS1A|FRS2A|FRS2alpha|SNT|SNT-1|SNT1	fibroblast growth factor receptor substrate 2	protein-coding
Yap_catlast-only89i_peak_22003	chr5	167241860	167242304	+	319	NA	intron (NM_001080428, intron 1 of 24)	intron (NM_001080428, intron 1 of 24)	60141	NM_001080428	57451	Hs.631957	NM_001080428	ENSG00000145934	TENM2	ODZ2|TEN-M2|TNM2|ten-2	teneurin transmembrane protein 2	protein-coding	TENM2
Yap_catlast-only89i_peak_12992	chr19	1028447	1028860	+	319	NA	intron (NM_001303501, intron 1 of 6)	intron (NM_001303501, intron 1 of 6)	2379	NM_001303501	1265	Hs.651512	NM_004368	ENSG00000064666	CNN2	-	calponin 2	protein-coding
Yap_catlast-only89i_peak_13119	chr19	6076613	6077110	+	319	NA	intron (NM_134433, intron 1 of 16)	intron (NM_134433, intron 1 of 16)	33803	NM_000635	5990	Hs.465709	NM_000635	ENSG00000087903	RFX2	-	regulatory factor X2	protein-coding	RFX2
Yap_catlast-only89i_peak_20163	chr4	148119510	148119956	+	318	NA	Intergenic	Intergenic	-252695	NM_031956	83894	Hs.378893	NM_031956	ENSG00000137473	TTC29	NYD-SP14|TBPP2A	tetratricopeptide repeat domain 29	protein-coding	TTC29
Yap_catlast-only89i_peak_2316	chr1	221613364	221613706	+	318	NA	Intergenic	Intergenic	-103897	NR_024236	400804	Hs.722626	NR_024236	ENSG00000234754	C1orf140	-	uncharacterized LOC400804	ncRNA	C1orf140
Yap_catlast-only89i_peak_17112	chr22	30631725	30632134	+	318	NA	Intergenic	Intergenic	10911	NM_001257135	3976	Hs.2250	NM_002309	ENSG00000128342	LIF	CDF|DIA|HILDA|MLPLI	leukemia inhibitory factor	protein-coding
Yap_catlast-only89i_peak_26557	chr8	98993242	98993880	+	318	NA	intron (NM_001317748, intron 6 of 17)	AluJr|SINE|Alu	60884	NR_002581	26775	Hs.684855	NR_002581	ENSG00000207067	SNORA72	RNU72|U72	small nucleolar RNA, H/ACA box 72	snoRNA	SNORA72
Yap_catlast-only89i_peak_24971	chr7	98463053	98463526	+	318	NA	intron (NM_152913, intron 1 of 7)	intron (NM_152913, intron 1 of 7)	4384	NM_001134451	222865	Hs.270753	NM_152913	ENSG00000166448	TMEM130	-	transmembrane protein 130	protein-coding
Yap_catlast-only89i_peak_2284	chr1	218669940	218670294	+	318	NA	intron (NR_031644, intron 2 of 6)	intron (NR_031644, intron 2 of 6)	54149	NR_125715	103611157	Hs.133379	NR_125715	ENSG00000281453	TGFB2-OT1	-	TGFB2 overlapping transcript 1	ncRNA	TGFB2-OT1
Yap_catlast-only89i_peak_7306	chr12	96883038	96883448	+	317	NA	promoter-TSS (NM_001306084)	promoter-TSS (NM_001306084)	-106	NM_001306084	144535	Hs.382121	NM_198520	ENSG00000188596	CFAP54	C12orf55|C12orf63	cilia and flagella associated protein 54	protein-coding
Yap_catlast-only89i_peak_4742	chr11	34655380	34655816	+	317	NA	intron (NM_001206616, intron 1 of 8)	intron (NM_001206616, intron 1 of 8)	1587	NM_001206616	26298	Hs.653859	NM_012153	ENSG00000135373	EHF	ESE3|ESE3B|ESEJ	ETS homologous factor	protein-coding
Yap_catlast-only89i_peak_11572	chr17	26890541	26890888	+	317	NA	intron (NM_033198, intron 4 of 11)	intron (NM_033198, intron 4 of 11)	8173	NM_033198	94005	Hs.462550	NM_033198	ENSG00000087111	PIGS	-	phosphatidylinositol glycan anchor biosynthesis class S	protein-coding	PIGS
Yap_catlast-only89i_peak_24095	chr7	6323000	6323623	+	317	NA	Intergenic	AluSx1|SINE|Alu	-11069	NM_004227	9265	Hs.487479	NM_004227	ENSG00000008256	CYTH3	ARNO3|GRP1|PSCD3|cytohesin-3	cytohesin 3	protein-coding	CYTH3
Yap_catlast-only89i_peak_27499	chr9	37472352	37472774	+	317	NA	Intergenic	L1MEc|LINE|L1	-7156	NM_014872	9925	Hs.161276	NM_014872	ENSG00000168795	ZBTB5	-	zinc finger and BTB domain containing 5	protein-coding	ZBTB5
Yap_catlast-only89i_peak_25487	chr7	142190878	142191526	+	317	NA	Intergenic	Intergenic	-182929	NM_001190487	100463482		NM_001190487	ENSG00000270672	MTRNR2L6	HN6	MT-RNR2-like 6	protein-coding	MTRNR2L6
Yap_catlast-only89i_peak_19834	chr4	86417328	86417731	+	317	NA	intron (NM_001025616, intron 1 of 9)	intron (NM_001025616, intron 1 of 9)	21245	NM_001025616	83478	Hs.444229	NM_031305	ENSG00000138639	ARHGAP24	FILGAP|RC-GAP72|RCGAP72|p73|p73RhoGAP	Rho GTPase activating protein 24	protein-coding
Yap_catlast-only89i_peak_24017	chr7	2860162	2860542	+	316	NA	intron (NM_007353, intron 1 of 3)	intron (NM_007353, intron 1 of 3)	-5459	NM_001282441	2768	Hs.487341	NM_007353	ENSG00000146535	GNA12	NNX3|RMP|gep	G protein subunit alpha 12	protein-coding
Yap_catlast-only89i_peak_24561	chr7	47644368	47644952	+	316	NA	Intergenic	Intergenic	-16877	NR_108090	101929086	Hs.563487	NR_108090	ENSG00000236078	LINC01447	-	long intergenic non-protein coding RNA 1447	ncRNA	LINC01447
Yap_catlast-only89i_peak_1080	chr1	64386064	64386677	+	315	NA	intron (NM_001083592, intron 1 of 6)	intron (NM_001083592, intron 1 of 6)	146680	NM_001083592	4919	Hs.128753	NM_005012	ENSG00000185483	ROR1	NTRKR1|dJ537F10.1	receptor tyrosine kinase like orphan receptor 1	protein-coding
Yap_catlast-only89i_peak_675	chr1	33564624	33565526	+	315	NA	intron (NM_001301823, intron 7 of 8)	intron (NM_001301823, intron 7 of 8)	17296	NM_001301826	113451	Hs.101807	NM_052998	ENSG00000142920	AZIN2	ADC|AZI2|AZIB1|ODC-p|ODC1L|ODCp	antizyme inhibitor 2	protein-coding
Yap_catlast-only89i_peak_8775	chr14	62031405	62031950	+	315	NA	non-coding (NR_110416, exon 4 of 5)	non-coding (NR_110416, exon 4 of 5)	5235	NR_110417	101927780	Hs.254789	NR_110416	ENSG00000250548	LOC101927780	-	uncharacterized LOC101927780	ncRNA
Yap_catlast-only89i_peak_12787	chr18	46524555	46524964	+	315	NA	Intergenic	Intergenic	-47678	NM_001190821	4092	Hs.465087	NM_005904	ENSG00000101665	SMAD7	CRCS3|MADH7|MADH8	SMAD family member 7	protein-coding
Yap_catlast-only89i_peak_1227	chr1	85667060	85667679	+	315	NA	promoter-TSS (NM_032184)	promoter-TSS (NM_032184)	-641	NM_032184	84144	Hs.533853	NM_032184	ENSG00000097096	SYDE2	-	synapse defective Rho GTPase homolog 2	protein-coding	SYDE2
Yap_catlast-only89i_peak_27930	chr9	112796076	112796604	+	315	NA	intron (NM_147150, intron 7 of 9)	intron (NM_147150, intron 7 of 9)	-14538	NM_001004065	11217	Hs.591908	NM_001004065	ENSG00000241978	AKAP2	AKAP-2|AKAPKL|MISP2|PRKA2	A-kinase anchoring protein 2	protein-coding	AKAP2
Yap_catlast-only89i_peak_799	chr1	42130788	42131264	+	315	NA	intron (NM_001127714, intron 1 of 7)	intron (NM_001127714, intron 1 of 7)	-180672	NM_001956	1907	Hs.1407	NM_001956	ENSG00000127129	EDN2	ET-2|ET2|PPET2	endothelin 2	protein-coding	EDN2
Yap_catlast-only89i_peak_7794	chr13	24364824	24365349	+	315	NA	intron (NM_005932, intron 16 of 18)	L2|LINE|L2	-97942	NM_001014442	542767	Hs.642624	NM_001014442		C1QTNF9B-AS1	PCOTH	C1QTNF9B antisense RNA 1	protein-coding	C1QTNF9B-AS1
Yap_catlast-only89i_peak_11973	chr17	48287682	48288177	+	314	NA	Intergenic	Intergenic	-4126	NR_110806	101927230	Hs.514326	NR_110806	ENSG00000251085	LINC01969	-	long intergenic non-protein coding RNA 1969	ncRNA
Yap_catlast-only89i_peak_9623	chr15	60685168	60685573	+	314	NA	intron (NM_001136015, intron 1 of 13)	intron (NM_001136015, intron 1 of 13)	4815	NM_004039	302	Hs.511605	NM_004039	ENSG00000182718	ANXA2	ANX2|ANX2L4|CAL1H|HEL-S-270|LIP2|LPC2|LPC2D|P36|PAP-IV	annexin A2	protein-coding	ANXA2
Yap_catlast-only89i_peak_27678	chr9	86500366	86500808	+	314	NA	intron (NM_017576, intron 9 of 17)	AluJb|SINE|Alu	35793	NM_001271927	55582	Hs.697514	NM_017576	ENSG00000165115	KIF27	-	kinesin family member 27	protein-coding
Yap_catlast-only89i_peak_22790	chr6	33749110	33749599	+	314	NA	intron (NM_181336, intron 3 of 8)	intron (NM_181336, intron 3 of 8)	5365	NM_001143944	221496	Hs.444845	NM_181336	ENSG00000161904	LEMD2	CTRCT42|NET25|dJ482C21.1	LEM domain containing 2	protein-coding
Yap_catlast-only89i_peak_26371	chr8	71227854	71228241	+	314	NA	intron (NM_001321703, intron 1 of 22)	intron (NM_001321703, intron 1 of 22)	87443	NM_001321712	10499	Hs.446678	NM_006540	ENSG00000140396	NCOA2	GRIP1|KAT13C|NCoA-2|SRC2|TIF2|bHLHe75	nuclear receptor coactivator 2	protein-coding
Yap_catlast-only89i_peak_20885	chr5	52095215	52095585	+	314	NA	intron (NM_181501, intron 1 of 28)	intron (NM_181501, intron 1 of 28)	11264	NM_181501	3672	Hs.644352	NM_181501	ENSG00000213949	ITGA1	CD49a|VLA1	integrin subunit alpha 1	protein-coding	ITGA1
Yap_catlast-only89i_peak_20575	chr5	15021374	15022082	+	313	NA	Intergenic	Intergenic	-149841	NM_054027	56172	Hs.156727	NM_054027	ENSG00000154122	ANKH	ANK|CCAL2|CMDJ|CPPDD|HANK|MANK	ANKH inorganic pyrophosphate transport regulator	protein-coding	ANKH
Yap_catlast-only89i_peak_6207	chr12	2376706	2377161	+	313	NA	intron (NM_001129830, intron 3 of 47)	intron (NM_001129830, intron 3 of 47)	-2009	NR_046769	100874370	Hs.653548	NR_046769		CACNA1C-IT3	-	CACNA1C intronic transcript 3	ncRNA	CACNA1C-IT3
Yap_catlast-only89i_peak_20447	chr5	5340463	5340775	+	312	NA	Intergenic	Intergenic	-82167	NM_015325	23379	Hs.449296	NM_015325	ENSG00000164151	ICE1	KIAA0947	interactor of little elongation complex ELL subunit 1	protein-coding	ICE1
Yap_catlast-only89i_peak_11331	chr17	8057483	8058031	+	312	NA	Intergenic	Intergenic	-2004	NM_002616	5187	Hs.445534	NM_002616	ENSG00000179094	PER1	PER|RIGUI|hPER	period circadian clock 1	protein-coding	PER1
Yap_catlast-only89i_peak_22578	chr6	26055162	26055684	+	312	NA	TTS (NM_005319)	TTS (NM_005319)	1276	NM_005319	3006	Hs.7644	NM_005319	ENSG00000187837	HIST1H1C	H1.2|H1C|H1F2|H1s-1	histone cluster 1 H1 family member c	protein-coding	HIST1H1C
Yap_catlast-only89i_peak_21310	chr5	98098756	98099424	+	311	NA	Intergenic	Intergenic	-5909	NM_001012761	285704	Hs.526902	NM_173670	ENSG00000174136	RGMB	DRAGON	repulsive guidance molecule family member b	protein-coding
Yap_catlast-only89i_peak_25035	chr7	100464744	100465259	+	310	NA	promoter-TSS (NR_106935)	promoter-TSS (NR_106935)	51	NM_003302	7205	Hs.534360	NM_003302	ENSG00000087077	TRIP6	OIP-1|OIP1|TRIP-6|TRIP6i2|ZRP-1	thyroid hormone receptor interactor 6	protein-coding	TRIP6
Yap_catlast-only89i_peak_16363	chr20	46924259	46924670	+	310	NA	Intergenic	Intergenic	-64190	NR_026958	284749	Hs.299080	NR_026958	ENSG00000235621	LINC00494	-	long intergenic non-protein coding RNA 494	ncRNA	LINC00494
Yap_catlast-only89i_peak_14071	chr2	19172379	19172765	+	310	NA	intron (NR_135287, intron 3 of 3)	intron (NR_135287, intron 3 of 3)	54154	NR_135287	400945	Hs.502854	NR_135287	ENSG00000236204	LINC01376	-	long intergenic non-protein coding RNA 1376	ncRNA
Yap_catlast-only89i_peak_23055	chr6	45413515	45413999	+	309	NA	intron (NM_001015051, intron 5 of 7)	intron (NM_001015051, intron 5 of 7)	23443	NM_001278478	860	Hs.535845	NM_004348	ENSG00000124813	RUNX2	AML3|CBF-alpha-1|CBFA1|CCD|CCD1|CLCD|OSF-2|OSF2|PEA2aA|PEBP2aA	runt related transcription factor 2	protein-coding
Yap_catlast-only89i_peak_542	chr1	27625764	27626311	+	309	NA	intron (NM_015023, intron 12 of 15)	L2c|LINE|L2	-22599	NM_032125	84065	Hs.469171	NM_032125	ENSG00000186501	TMEM222	C1orf160	transmembrane protein 222	protein-coding	TMEM222
Yap_catlast-only89i_peak_17884	chr3	47018452	47018738	+	308	NA	promoter-TSS (NR_102269)	promoter-TSS (NR_102269)	-338	NM_001277074	151903	Hs.631918	NM_144716	ENSG00000160799	CCDC12	-	coiled-coil domain containing 12	protein-coding
Yap_catlast-only89i_peak_19371	chr4	7024010	7024382	+	308	NA	intron (NM_001330638, intron 11 of 12)	intron (NM_001330638, intron 11 of 12)	20532	NM_153376	257236	Hs.656757	NM_153376	ENSG00000173013	CCDC96	-	coiled-coil domain containing 96	protein-coding	CCDC96
Yap_catlast-only89i_peak_837	chr1	43938074	43938765	+	308	NA	Intergenic	Intergenic	-18759	NM_001243526	81888	Hs.709864	NM_031207	ENSG00000178922	HYI	HT036	hydroxypyruvate isomerase (putative)	protein-coding
Yap_catlast-only89i_peak_5606	chr11	87155892	87156411	+	308	NA	Intergenic	MIRb|SINE|MIR	274152	NR_135090	105369423	Hs.125442	NR_135090	ENSG00000255183	LOC105369423	-	uncharacterized LOC105369423	ncRNA
Yap_catlast-only89i_peak_10181	chr16	4550208	4550760	+	308	NA	intron (NM_001286267, intron 2 of 6)	intron (NM_001286267, intron 2 of 6)	4625	NM_001127205	3163	Hs.284279	NM_002134	ENSG00000103415	HMOX2	HO-2	heme oxygenase 2	protein-coding
Yap_catlast-only89i_peak_5717	chr11	101317009	101317437	+	308	NA	Intergenic	MER117|DNA|hAT-Charlie	73413	NR_037485	100500823		NR_037485	ENSG00000263885	MIR3920	-	microRNA 3920	ncRNA	MIR3920
Yap_catlast-only89i_peak_18025	chr3	58033427	58034049	+	308	NA	intron (NM_001164317, intron 1 of 46)	L1MC4|LINE|L1	39611	NM_001164317	2317	Hs.476448	NM_001457	ENSG00000136068	FLNB	ABP-278|ABP-280|AOI|FH1|FLN-B|FLN1L|LRS1|SCT|TABP|TAP	filamin B	protein-coding
Yap_catlast-only89i_peak_23261	chr6	78166356	78166538	+	307	NA	Intergenic	Intergenic	7292	NM_000863	3351	Hs.123016	NM_000863	ENSG00000135312	HTR1B	5-HT-1B|5-HT-1D-beta|5-HT1B|5-HT1DB|HTR1D2|HTR1DB|S12	5-hydroxytryptamine receptor 1B	protein-coding	HTR1B
Yap_catlast-only89i_peak_13168	chr19	8524609	8525165	+	307	NA	intron (NM_001297418, intron 3 of 13)	intron (NM_001297418, intron 3 of 13)	15084	NM_031203	4670	Hs.465808	NM_005968	ENSG00000099783	HNRNPM	CEAR|HNRNPM4|HNRPM|HNRPM4|HTGR1|NAGR1|hnRNP M	heterogeneous nuclear ribonucleoprotein M	protein-coding
Yap_catlast-only89i_peak_4965	chr11	57405768	57405999	+	306	NA	Intergenic	Intergenic	-2788	NR_029673	406919		NR_029673	ENSG00000208009	MIR130A	MIRN130A|miRNA130A|mir-130a	microRNA 130a	ncRNA	MIR130A
Yap_catlast-only89i_peak_27144	chr8	145014207	145014925	+	306	NA	promoter-TSS (NM_201384)	promoter-TSS (NM_201384)	-808	NM_201384	5339	Hs.434248	NM_000445	ENSG00000178209	PLEC	EBS1|EBSMD|EBSND|EBSO|EBSOG|EBSPA|HD1|LGMD2Q|PCN|PLEC1|PLEC1b|PLTN	plectin	protein-coding
Yap_catlast-only89i_peak_9476	chr15	43182560	43183132	+	306	NA	intron (NM_173500, intron 1 of 14)	intron (NM_173500, intron 1 of 14)	30161	NM_173500	146057	Hs.646511	NM_173500	ENSG00000128881	TTBK2	SCA11|TTBK	tau tubulin kinase 2	protein-coding	TTBK2
Yap_catlast-only89i_peak_26826	chr8	123613932	123614426	+	306	NA	Intergenic	Intergenic	-33296	NR_131202	105375734	Hs.628341	NR_131202		LOC105375734	-	uncharacterized LOC105375734	ncRNA	LOC105375734
Yap_catlast-only89i_peak_16278	chr20	43321529	43322005	+	306	NA	Intergenic	Intergenic	-21387	NR_034104	79015	Hs.671450	NM_024049	ENSG00000283440	LINC01260	-	long intergenic non-protein coding RNA 1260	ncRNA
Yap_catlast-only89i_peak_7156	chr12	79813827	79814229	+	306	NA	TTS (NR_031700)	TTS (NR_031700)	991	NR_031700	100302136		NR_031700	ENSG00000221788	MIR1252	MIRN1252|hsa-mir-1252	microRNA 1252	ncRNA	MIR1252
Yap_catlast-only89i_peak_2995	chr10	34817150	34817491	+	306	NA	intron (NM_001184785, intron 2 of 24)	intron (NM_001184785, intron 2 of 24)	286933	NM_001184791	56288	Hs.131489	NM_019619	ENSG00000148498	PARD3	ASIP|Baz|PAR3|PAR3alpha|PARD-3|PARD3A|PPP1R118|SE2-5L16|SE2-5LT1|SE2-5T2	par-3 family cell polarity regulator	protein-coding
Yap_catlast-only89i_peak_15843	chr20	10629327	10629763	+	305	NA	TTS (NR_106930)	TTS (NR_106930)	798	NR_106930	102465525		NR_106930	ENSG00000273745	MIR6870	hsa-mir-6870	microRNA 6870	ncRNA	MIR6870
Yap_catlast-only89i_peak_947	chr1	53647505	53648183	+	305	NA	Intergenic	Intergenic	-14257	NM_000098	1376	Hs.713535	NM_000098	ENSG00000157184	CPT2	CPT1|CPTASE|IIAE4	carnitine palmitoyltransferase 2	protein-coding	CPT2
Yap_catlast-only89i_peak_24453	chr7	40261427	40261871	+	305	NA	intron (NM_024728, intron 6 of 14)	intron (NM_024728, intron 6 of 14)	87074	NM_001193312	79783	Hs.586313	NM_024728	ENSG00000175600	SUGCT	C7orf10|DERP13|GA3|ORF19	succinyl-CoA:glutarate-CoA transferase	protein-coding
Yap_catlast-only89i_peak_9211	chr14	95076469	95076746	+	305	NA	Intergenic	AluJr|SINE|Alu	-2107	NM_001085	12	Hs.534293	NM_001085	ENSG00000196136	SERPINA3	AACT|ACT|GIG24|GIG25	serpin family A member 3	protein-coding	SERPINA3
Yap_catlast-only89i_peak_641	chr1	32599080	32599419	+	304	NA	intron (NM_012316, intron 1 of 13)	AluJo|SINE|Alu	25605	NM_012316	23633	Hs.470588	NM_012316	ENSG00000025800	KPNA6	IPOA7|KPNA7	karyopherin subunit alpha 6	protein-coding	KPNA6
Yap_catlast-only89i_peak_2859	chr10	28569631	28570135	+	303	NA	intron (NM_173496, intron 1 of 18)	intron (NM_173496, intron 1 of 18)	1143	NM_173496	143098	Hs.499159	NM_173496	ENSG00000150054	MPP7	-	membrane palmitoylated protein 7	protein-coding	MPP7
Yap_catlast-only89i_peak_24569	chr7	47823626	47823942	+	303	NA	intron (NM_138295, intron 56 of 56)	intron (NM_138295, intron 56 of 56)	-11105	NM_025031	80099	Hs.287647	NM_025031		C7orf69	-	chromosome 7 open reading frame 69	protein-coding	C7orf69
Yap_catlast-only89i_peak_4008	chr10	112466459	112466828	+	303	NA	intron (NM_001134363, intron 1 of 13)	intron (NM_001134363, intron 1 of 13)	62488	NM_001134363	282996	Hs.116630	NM_001134363	ENSG00000203867	RBM20	-	RNA binding motif protein 20	protein-coding	RBM20
Yap_catlast-only89i_peak_4502	chr11	12087739	12088164	+	302	NA	Intergenic	MLT1F2|LTR|ERVL-MaLR	35529	NR_135109	105376554	Hs.523483	NR_135109	ENSG00000254486	LOC105376554	-	uncharacterized LOC105376554	ncRNA
Yap_catlast-only89i_peak_1253	chr1	86077536	86078047	+	302	NA	Intergenic	Intergenic	31347	NM_001554	3491	Hs.8867	NM_001554	ENSG00000142871	CYR61	CCN1|GIG1|IGFBP10	cysteine rich angiogenic inducer 61	protein-coding	CYR61
Yap_catlast-only89i_peak_22569	chr6	25172993	25173409	+	302	NA	Intergenic	Intergenic	-34581	NR_027626	8418	Hs.484918	NR_002174		CMAHP	CMAH|CSAH	cytidine monophospho-N-acetylneuraminic acid hydroxylase, pseudogene	pseudo
Yap_catlast-only89i_peak_3329	chr10	72050326	72050689	+	301	NA	Intergenic	MER5B|DNA|hAT-Charlie	-7057	NM_022146	64106	Hs.302026	NM_022146	ENSG00000148734	NPFFR1	GPR147|NPFF1|NPFF1R1|OT7T022	neuropeptide FF receptor 1	protein-coding	NPFFR1
Yap_catlast-only89i_peak_8814	chr14	65078804	65079093	+	301	NA	Intergenic	Plat_L3|LINE|CR1	62328	NM_172365	145376	Hs.144696	NM_172365	ENSG00000165807	PPP1R36	C14orf50	protein phosphatase 1 regulatory subunit 36	protein-coding	PPP1R36
Yap_catlast-only89i_peak_24872	chr7	84277137	84277500	+	301	NA	Intergenic	Intergenic	115526	NR_110079	101927378	Hs.539042	NR_110079	ENSG00000235139	LOC101927378	-	uncharacterized LOC101927378	ncRNA	LOC101927378
Yap_catlast-only89i_peak_12674	chr18	25784074	25784596	+	301	NA	Intergenic	ERVL-E-int|LTR|ERVL	-26925	NM_001792	1000	Hs.464829	NM_001792	ENSG00000170558	CDH2	CD325|CDHN|CDw325|NCAD	cadherin 2	protein-coding	CDH2
Yap_catlast-only89i_peak_18710	chr3	143737552	143738051	+	301	NA	Intergenic	FRAM|SINE|Alu	45634	NM_001134470	205428	Hs.288954	NM_173552	ENSG00000181744	C3orf58	DIA1|GoPro49|HASF	chromosome 3 open reading frame 58	protein-coding
Yap_catlast-only89i_peak_12416	chr18	475056	475724	+	300	NA	intron (NM_130386, intron 2 of 9)	intron (NM_130386, intron 2 of 9)	25339	NM_130386	81035	Hs.464422	NM_030781	ENSG00000158270	COLEC12	CLP1|NSR2|SCARA4|SRCL	collectin subfamily member 12	protein-coding
Yap_catlast-only89i_peak_10954	chr16	85208014	85208429	+	300	NA	Intergenic	L2a|LINE|L2	37465	NR_033984	400548	Hs.592054	NR_033984	ENSG00000278214	LINC02139	-	long intergenic non-protein coding RNA 2139	ncRNA
Yap_catlast-only89i_peak_7183	chr12	82570915	82571242	+	299	NA	Intergenic	Intergenic	181121	NM_014167	29080	Hs.582627	NM_014167	ENSG00000133773	CCDC59	BR22|HSPC128|TAP26	coiled-coil domain containing 59	protein-coding	CCDC59
Yap_catlast-only89i_peak_20063	chr4	129450321	129450739	+	299	NA	Intergenic	L2c|LINE|L2	101359	NR_125882	100507487	Hs.549644	NR_125882	ENSG00000251432	LOC100507487	-	uncharacterized LOC100507487	ncRNA	LOC100507487
Yap_catlast-only89i_peak_28446	chrX	9985761	9986288	+	299	NA	intron (NM_015691, intron 1 of 22)	intron (NM_015691, intron 1 of 22)	2229	NM_015691	55841	Hs.527524	NM_015691	ENSG00000047644	WWC3	BM042	WWC family member 3	protein-coding	WWC3
Yap_catlast-only89i_peak_18316	chr3	110295750	110296173	+	299	NA	Intergenic	Intergenic	492845	NR_045114	100506555	Hs.535689	NR_045114		PVRL3-AS1	-	PVRL3 antisense RNA 1	ncRNA	PVRL3-AS1
Yap_catlast-only89i_peak_17377	chr22	44311319	44311686	+	299	NA	Intergenic	AluYc|SINE|Alu	-8117	NM_025225	80339	Hs.654800	NM_025225	ENSG00000100344	PNPLA3	ADPN|C22orf20|iPLA(2)epsilon	patatin like phospholipase domain containing 3	protein-coding	PNPLA3
Yap_catlast-only89i_peak_9128	chr14	89892260	89892704	+	299	NA	intron (NM_001085471, intron 1 of 6)	MER82|DNA|TcMar-Tigger	8784	NR_036500	400236	Hs.585207	NR_036500	ENSG00000258920	FOXN3-AS1	-	FOXN3 antisense RNA 1	ncRNA	FOXN3-AS1
Yap_catlast-only89i_peak_11091	chr16	89772414	89772763	+	299	NA	TTS (NM_004913)	TTS (NM_004913)	-4467	NM_152339	124044	Hs.374556	NM_152339	ENSG00000158792	SPATA2L	C16orf76|tamo	spermatogenesis associated 2 like	protein-coding	SPATA2L
Yap_catlast-only89i_peak_28850	chrX	112025773	112025892	+	299	NA	exon (NM_001113490, exon 8 of 11)	exon (NM_001113490, exon 8 of 11)	-1816	NR_036255	100423009		NR_036255	ENSG00000126016	MIR4329	-	microRNA 4329	ncRNA	MIR4329
Yap_catlast-only89i_peak_21499	chr5	131150591	131151092	+	299	NA	intron (NM_001303622, intron 12 of 12)	ERVL-B4-int|LTR|ERVL	-18085	NM_001346113	96459	Hs.591273	NM_133372	ENSG00000217128	FNIP1	-	folliculin interacting protein 1	protein-coding
Yap_catlast-only89i_peak_26008	chr8	32210995	32211429	+	298	NA	intron (NM_013962, intron 1 of 4)	L1ME1|LINE|L1	-87050	NR_047475	100874286	Hs.147060	NR_047475	ENSG00000254049	NRG1-IT3	-	NRG1 intronic transcript 3	ncRNA	NRG1-IT3
Yap_catlast-only89i_peak_9541	chr15	51202626	51203047	+	298	NA	intron (NM_007347, intron 1 of 20)	intron (NM_007347, intron 1 of 20)	1967	NM_001252127	23431	Hs.413366	NM_007347	ENSG00000081014	AP4E1	CPSQ4|SPG51|STUT1	adaptor related protein complex 4 epsilon 1 subunit	protein-coding
Yap_catlast-only89i_peak_2408	chr1	231275758	231276530	+	298	NA	Intergenic	Intergenic	-22530	NM_001300889	440730	Hs.655089	NM_001004342	ENSG00000119283	TRIM67	TNL	tripartite motif containing 67	protein-coding
Yap_catlast-only89i_peak_18270	chr3	104078405	104078627	+	298	NA	Intergenic	Intergenic	-132411	NR_030330	693127		NR_030330	ENSG00000208032	MIR548A3	MIRN548A3	microRNA 548a-3	ncRNA	MIR548A3
Yap_catlast-only89i_peak_13008	chr19	1265366	1265714	+	298	NA	Intergenic	Intergenic	-3725	NM_001300829	1153	Hs.618145	NM_001280	ENSG00000099622	CIRBP	CIRP	cold inducible RNA binding protein	protein-coding
Yap_catlast-only89i_peak_15740	chr20	3047343	3047540	+	298	NA	Intergenic	L2a|LINE|L2	-4825	NM_000915	5020	Hs.113216	NM_000915	ENSG00000101405	OXT	OT|OT-NPI|OXT-NPI	oxytocin/neurophysin I prepropeptide	protein-coding	OXT
Yap_catlast-only89i_peak_9353	chr15	29904228	29904689	+	298	NA	Intergenic	Intergenic	-41531	NM_015307	23359	Hs.383564	NM_015307	ENSG00000104059	FAM189A1	TMEM228	family with sequence similarity 189 member A1	protein-coding	FAM189A1
Yap_catlast-only89i_peak_22857	chr6	36553260	36553731	+	297	NA	Intergenic	AluSx1|SINE|Alu	-8595	NR_036610	6428	Hs.405144	NM_003017	ENSG00000112081	SRSF3	SFRS3|SRp20	serine and arginine rich splicing factor 3	protein-coding
Yap_catlast-only89i_peak_25313	chr7	128470155	128470616	+	297	NA	promoter-TSS (NM_001458)	promoter-TSS (NM_001458)	-98	NM_001458	2318	Hs.58414	NM_001458	ENSG00000128591	FLNC	ABP-280|ABP280A|ABPA|ABPL|CMH26|FLN2|MFM5|MPD4|RCM5	filamin C	protein-coding	FLNC
Yap_catlast-only89i_peak_14103	chr2	20784082	20784659	+	297	NA	Intergenic	Intergenic	7938	NR_046836	100874343	Hs.591546	NR_046836	ENSG00000231948	HS1BP3-IT1	-	HS1BP3 intronic transcript 1	ncRNA	HS1BP3-IT1
Yap_catlast-only89i_peak_4783	chr11	36171235	36171613	+	297	NA	intron (NM_174902, intron 4 of 5)	intron (NM_174902, intron 4 of 5)	-71973	NR_135064	101928510	Hs.675857	NR_135064		LOC101928510	-	uncharacterized LOC101928510	ncRNA
Yap_catlast-only89i_peak_13749	chr19	47343796	47344141	+	297	NA	intron (NM_001301078, intron 2 of 4)	intron (NM_001301078, intron 2 of 4)	9579	NM_001301076	1175	Hs.119591	NM_004069	ENSG00000042753	AP2S1	AP17|CLAPS2|FBH3|FBHOk|HHC3	adaptor related protein complex 2 sigma 1 subunit	protein-coding
Yap_catlast-only89i_peak_3057	chr10	44426702	44427246	+	297	NA	intron (NR_033846, intron 2 of 7)	intron (NR_033846, intron 2 of 7)	19124	NR_136148	283033	Hs.178244	NR_033846		LINC00841	-	long intergenic non-protein coding RNA 841	ncRNA
Yap_catlast-only89i_peak_23237	chr6	75316413	75316808	+	297	NA	intron (NR_110856, intron 2 of 3)	intron (NR_110856, intron 2 of 3)	537443	NR_110856	101928516	Hs.384600	NR_110856	ENSG00000223786	LOC101928516	-	uncharacterized LOC101928516	ncRNA	LOC101928516
Yap_catlast-only89i_peak_14215	chr2	36565938	36566364	+	296	NA	Intergenic	Intergenic	16562	NR_037631	100288911	Hs.432924	NR_037631		LOC100288911	-	uncharacterized LOC100288911	ncRNA	LOC100288911
Yap_catlast-only89i_peak_1191	chr1	78567249	78567608	+	296	NA	intron (NM_017655, intron 3 of 5)	intron (NM_017655, intron 3 of 5)	55839	NM_017655	54810	Hs.603818	NM_017655	ENSG00000137960	GIPC2	SEMCAP-2|SEMCAP2	GIPC PDZ domain containing family member 2	protein-coding	GIPC2
Yap_catlast-only89i_peak_1328	chr1	94219969	94220508	+	295	NA	intron (NM_001261408, intron 2 of 13)	Tigger3b|DNA|TcMar-Tigger	-72844	NM_003567	8412	Hs.36958	NM_003567	ENSG00000137936	BCAR3	NSP2|SH2D3B	breast cancer anti-estrogen resistance 3	protein-coding	BCAR3
Yap_catlast-only89i_peak_25694	chr8	13224177	13224698	+	295	NA	intron (NM_024767, intron 4 of 4)	intron (NM_024767, intron 4 of 4)	-90380	NM_001316668	10395	Hs.134296	NM_006094	ENSG00000164741	DLC1	ARHGAP7|HP|STARD12|p122-RhoGAP	DLC1 Rho GTPase activating protein	protein-coding
Yap_catlast-only89i_peak_20261	chr4	167356620	167357008	+	295	NA	Intergenic	ERVL-B4-int|LTR|ERVL	562404	NM_001204760	7092	Hs.106513	NM_012464	ENSG00000038295	TLL1	ASD6|TLL	tolloid like 1	protein-coding
Yap_catlast-only89i_peak_10078	chr16	122513	123090	+	295	NA	promoter-TSS (NM_022450)	promoter-TSS (NM_022450)	-172	NM_022450	64285	Hs.744992	NM_022450	ENSG00000007384	RHBDF1	C16orf8|Dist1|EGFR-RS|gene-89|gene-90|hDist1	rhomboid 5 homolog 1	protein-coding	RHBDF1
Yap_catlast-only89i_peak_625	chr1	32155447	32155785	+	295	NA	intron (NM_001856, intron 22 of 70)	intron (NM_001856, intron 22 of 70)	14152	NM_001856	1307	Hs.368921	NM_001856	ENSG00000084636	COL16A1	447AA|FP1572	collagen type XVI alpha 1 chain	protein-coding	COL16A1
Yap_catlast-only89i_peak_15259	chr2	196385322	196385870	+	295	NA	Intergenic	LTR35|LTR|ERV1	-135936	NM_001127257	57181	Hs.650158	NM_020342	ENSG00000196950	SLC39A10	LZT-Hs2	solute carrier family 39 member 10	protein-coding
Yap_catlast-only89i_peak_5180	chr11	65266296	65266613	+	295	NA	non-coding (NR_002819, exon 1 of 1)	non-coding (NR_002819, exon 1 of 1)	1245	NR_002819	378938	Hs.621695	NR_002819		MALAT1	HCN|LINC00047|NCRNA00047|NEAT2|PRO2853	metastasis associated lung adenocarcinoma transcript 1 (non-protein coding)	ncRNA	MALAT1
Yap_catlast-only89i_peak_9090	chr14	80048579	80048959	+	295	NA	intron (NM_001105250, intron 2 of 6)	intron (NM_001105250, intron 2 of 6)	303087	NR_073546	9369	Hs.368307	NM_004796	ENSG00000021645	NRXN3	C14orf60	neurexin 3	protein-coding
Yap_catlast-only89i_peak_3709	chr10	95225429	95225962	+	295	NA	intron (NM_013451, intron 1 of 53)	intron (NM_013451, intron 1 of 53)	16379	NM_133337	26509	Hs.602086	NM_013451	ENSG00000138119	MYOF	FER1L3	myoferlin	protein-coding
Yap_catlast-only89i_peak_27309	chr9	16191661	16192183	+	295	NA	Intergenic	Intergenic	61183	NM_001271829	100129385	Hs.586441	NM_001271829	ENSG00000205549	C9orf92	Em:AL513424.1	chromosome 9 open reading frame 92	protein-coding	C9orf92
Yap_catlast-only89i_peak_24847	chr7	80571582	80572045	+	295	NA	Intergenic	Intergenic	-23146	NM_006379	10512	Hs.269109	NM_006379	ENSG00000075223	SEMA3C	SEMAE|SemE	semaphorin 3C	protein-coding	SEMA3C
Yap_catlast-only89i_peak_624	chr1	32112740	32113089	+	295	NA	Intergenic	L2|LINE|L2	-2076	NR_033686	553115	Hs.470417	NM_012392	ENSG00000162517	PEF1	ABP32|PEF1A	penta-EF-hand domain containing 1	protein-coding
Yap_catlast-only89i_peak_7080	chr12	69446836	69447226	+	294	NA	Intergenic	Intergenic	-90011	NM_001874	1368	Hs.654387	NM_001874	ENSG00000135678	CPM	-	carboxypeptidase M	protein-coding	CPM
Yap_catlast-only89i_peak_3313	chr10	71529126	71529479	+	294	NA	Intergenic	Intergenic	-32342	NM_080802	1305	Hs.695934	NM_005203	ENSG00000197467	COL13A1	CMS19|COLXIIIA1	collagen type XIII alpha 1 chain	protein-coding
Yap_catlast-only89i_peak_9247	chr14	100497875	100498327	+	294	NA	intron (NM_001330221, intron 1 of 13)	intron (NM_001330221, intron 1 of 13)	-33650	NM_016337	51466	Hs.125867	NM_016337	ENSG00000196405	EVL	RNB6	Enah/Vasp-like	protein-coding	EVL
Yap_catlast-only89i_peak_24336	chr7	29762754	29763216	+	292	NA	Intergenic	Intergenic	-37548	NR_027347	100271874	Hs.729709	NR_027347		ZNRF2P2	-	zinc and ring finger 2 pseudogene 2	pseudo	ZNRF2P2
Yap_catlast-only89i_peak_12018	chr17	55952763	55953091	+	292	NA	intron (NM_001292025, intron 3 of 10)	intron (NM_001292025, intron 3 of 10)	-25494	NM_016070	51649	Hs.5836	NM_016070	ENSG00000181610	MRPS23	CGI-138|HSPC329|MRP-S23	mitochondrial ribosomal protein S23	protein-coding	MRPS23
Yap_catlast-only89i_peak_24754	chr7	73748358	73748844	+	292	NA	intron (NM_003388, intron 2 of 16)	intron (NM_003388, intron 2 of 16)	44796	NM_003388	7461	Hs.647018	NM_003388	ENSG00000106665	CLIP2	CLIP|CLIP-115|CYLN2|WBSCR3|WBSCR4|WSCR3|WSCR4	CAP-Gly domain containing linker protein 2	protein-coding	CLIP2
Yap_catlast-only89i_peak_21107	chr5	73567856	73568355	+	292	NA	Intergenic	Intergenic	36045	NR_105009	102503429	Hs.519391	NR_105009	ENSG00000248942	LINC01335	-	long intergenic non-protein coding RNA 1335	ncRNA	LINC01335
Yap_catlast-only89i_peak_9885	chr15	77788926	77789389	+	292	NA	Intergenic	Intergenic	-28780	NR_135692	101929457	Hs.637111	NR_135692	ENSG00000259362	LOC101929457	-	uncharacterized LOC101929457	ncRNA
Yap_catlast-only89i_peak_10153	chr16	3989089	3989675	+	291	NA	Intergenic	Intergenic	11063	NR_120311	102724927	Hs.364739	NR_120311	ENSG00000262185	LOC102724927	-	uncharacterized LOC102724927	ncRNA	LOC102724927
Yap_catlast-only89i_peak_3113	chr10	50692571	50693068	+	291	NA	intron (NM_001346440, intron 8 of 20)	L1M6|LINE|L1	39508	NM_170753	267004	Hs.49063	NM_170753	ENSG00000243251	PGBD3	-	piggyBac transposable element derived 3	protein-coding	PGBD3
Yap_catlast-only89i_peak_20953	chr5	55554755	55555315	+	291	NA	Intergenic	Intergenic	-25849	NM_024669	79722	Hs.436214	NM_024669	ENSG00000164512	ANKRD55	-	ankyrin repeat domain 55	protein-coding	ANKRD55
Yap_catlast-only89i_peak_1503	chr1	113058245	113058612	+	291	NA	intron (NM_001291880, intron 2 of 4)	intron (NM_001291880, intron 2 of 4)	7058	NM_024494	7482	Hs.258575	NM_004185	ENSG00000134245	WNT2B	WNT13	Wnt family member 2B	protein-coding
Yap_catlast-only89i_peak_10869	chr16	81544912	81545379	+	290	NA	intron (NM_030629, intron 1 of 20)	L1MC5|LINE|L1	16191	NM_030629	80790	Hs.594095	NM_030629	ENSG00000153815	CMIP	TCMIP	c-Maf inducing protein	protein-coding	CMIP
Yap_catlast-only89i_peak_5872	chr11	114224774	114225112	+	290	NA	Intergenic	Intergenic	25818	NR_120567	101928940	Hs.409846	NR_120567	ENSG00000256195	LOC101928940	-	uncharacterized LOC101928940	ncRNA	LOC101928940
Yap_catlast-only89i_peak_6112	chr11	130253398	130253827	+	290	NA	Intergenic	Intergenic	45276	NM_007037	11095	Hs.271605	NM_007037	ENSG00000134917	ADAMTS8	ADAM-TS8|METH2	ADAM metallopeptidase with thrombospondin type 1 motif 8	protein-coding	ADAMTS8
Yap_catlast-only89i_peak_12248	chr17	73426419	73426784	+	290	NA	Intergenic	Intergenic	24451	NR_037449	100500841		NR_037449	ENSG00000264511	MIR3678	mir-3678	microRNA 3678	ncRNA	MIR3678
Yap_catlast-only89i_peak_11185	chr17	2302884	2303407	+	290	NA	intron (NM_020310, intron 1 of 5)	CpG	1113	NM_020310	4335	Hs.626579	NM_020310	ENSG00000070444	MNT	MAD6|MXD6|ROX|bHLHd3	MAX network transcriptional repressor	protein-coding	MNT
Yap_catlast-only89i_peak_5380	chr11	71852149	71852463	+	290	NA	Intergenic	L1MC4|LINE|L1	5550	NM_000804	2352	Hs.352	NM_000804	ENSG00000110203	FOLR3	FR-G|FR-gamma|gamma-hFR	folate receptor 3	protein-coding	FOLR3
Yap_catlast-only89i_peak_996	chr1	56192606	56193002	+	290	NA	Intergenic	Intergenic	501490	NR_039618	100616272		NR_039618	ENSG00000265822	MIR4422	mir-4422	microRNA 4422	ncRNA	MIR4422
Yap_catlast-only89i_peak_7634	chr12	122362535	122362935	+	290	NA	intron (NM_001178003, intron 3 of 17)	intron (NM_001178003, intron 3 of 17)	6272	NM_001178003	144406	Hs.709837	NM_144668	ENSG00000158023	WDR66	CaM-IP4	WD repeat domain 66	protein-coding
Yap_catlast-only89i_peak_26329	chr8	67375774	67376079	+	290	NA	intron (NM_144650, intron 13 of 13)	intron (NM_144650, intron 13 of 13)	-29565	NM_152765	254778	Hs.268869	NM_152765	ENSG00000169085	C8orf46	-	chromosome 8 open reading frame 46	protein-coding	C8orf46
Yap_catlast-only89i_peak_13547	chr19	39150240	39150673	+	290	NA	intron (NM_001322033, intron 1 of 20)	intron (NM_001322033, intron 1 of 20)	12200	NM_004924	81	Hs.270291	NM_004924	ENSG00000130402	ACTN4	ACTININ-4|FSGS|FSGS1	actinin alpha 4	protein-coding	ACTN4
Yap_catlast-only89i_peak_10524	chr16	54545079	54545542	+	290	NA	Intergenic	Intergenic	-140699	NR_134923	100996345	Hs.112680	NR_134922	ENSG00000261803	LINC02140	-	long intergenic non-protein coding RNA 2140	ncRNA
Yap_catlast-only89i_peak_16215	chr20	39118588	39118959	+	290	NA	Intergenic	ERVL-int|LTR|ERVL	199107	NM_005461	9935	Hs.169487	NM_005461	ENSG00000204103	MAFB	DURS3|KRML|MCTO	MAF bZIP transcription factor B	protein-coding	MAFB
Yap_catlast-only89i_peak_23438	chr6	107429286	107429880	+	290	NA	intron (NM_001080450, intron 1 of 4)	intron (NM_001080450, intron 1 of 4)	6053	NM_001080450	57673	Hs.418045	NM_001080450	ENSG00000178409	BEND3	KIAA1553	BEN domain containing 3	protein-coding	BEND3
Yap_catlast-only89i_peak_5382	chr11	71856056	71856590	+	290	NA	Intergenic	AluJb|SINE|Alu	9567	NM_000804	2352	Hs.352	NM_000804	ENSG00000110203	FOLR3	FR-G|FR-gamma|gamma-hFR	folate receptor 3	protein-coding	FOLR3
Yap_catlast-only89i_peak_21207	chr5	83545663	83546058	+	290	NA	intron (NM_005711, intron 2 of 10)	intron (NM_005711, intron 2 of 10)	134825	NM_005711	10085	Hs.482730	NM_005711	ENSG00000164176	EDIL3	DEL1	EGF like repeats and discoidin domains 3	protein-coding	EDIL3
Yap_catlast-only89i_peak_1254	chr1	86078190	86078845	+	289	NA	Intergenic	Intergenic	32073	NM_001554	3491	Hs.8867	NM_001554	ENSG00000142871	CYR61	CCN1|GIG1|IGFBP10	cysteine rich angiogenic inducer 61	protein-coding	CYR61
Yap_catlast-only89i_peak_10794	chr16	73087317	73087642	+	289	NA	intron (NM_001164766, intron 1 of 8)	intron (NM_001164766, intron 1 of 8)	5055	NM_001164766	463	Hs.598297	NM_006885	ENSG00000140836	ZFHX3	ATBF1|ATBT|ZNF927	zinc finger homeobox 3	protein-coding
Yap_catlast-only89i_peak_3152	chr10	59452079	59452500	+	289	NA	Intergenic	MLT1C|LTR|ERVL-MaLR	-387970	NR_037490	100500834		NR_037490	ENSG00000264747	MIR3924	-	microRNA 3924	ncRNA	MIR3924
Yap_catlast-only89i_peak_17813	chr3	42159095	42159511	+	289	NA	intron (NM_001042646, intron 1 of 15)	intron (NM_001042646, intron 1 of 15)	26557	NM_001265608	22906	Hs.535711	NM_014965	ENSG00000182606	TRAK1	MILT1|OIP106	trafficking kinesin protein 1	protein-coding
Yap_catlast-only89i_peak_9877	chr15	76726112	76726567	+	289	NA	intron (NM_001145923, intron 26 of 31)	intron (NM_001145923, intron 26 of 31)	97274	NM_145805	64843	Hs.444677	NM_145805	ENSG00000159556	ISL2	-	ISL LIM homeobox 2	protein-coding	ISL2
Yap_catlast-only89i_peak_22826	chr6	35392898	35393343	+	289	NA	TTS (NM_177435)	TTS (NM_177435)	-27018	NM_021922	2178	Hs.302003	NM_021922	ENSG00000112039	FANCE	FACE|FAE	Fanconi anemia complementation group E	protein-coding	FANCE
Yap_catlast-only89i_peak_306	chr1	17454967	17455347	+	288	NA	Intergenic	LTR24B|LTR|ERV1	-9209	NM_007365	11240	Hs.33455	NM_007365	ENSG00000117115	PADI2	PAD-H19|PAD2|PDI2	peptidyl arginine deiminase 2	protein-coding	PADI2
Yap_catlast-only89i_peak_27914	chr9	112533271	112533855	+	288	NA	intron (NM_001037293, intron 1 of 6)	intron (NM_001037293, intron 1 of 6)	-9014	NM_053016	114299	Hs.591908	NM_053016	ENSG00000157654	PALM2	AKAP2	paralemmin 2	protein-coding	PALM2
Yap_catlast-only89i_peak_23193	chr6	72188385	72188917	+	288	NA	Intergenic	Intergenic	57921	NR_121615	102724000	Hs.145785	NR_121615		LINC01626	-	long intergenic non-protein coding RNA 1626	ncRNA
Yap_catlast-only89i_peak_8509	chr14	35070114	35070810	+	288	NA	intron (NM_021249, intron 5 of 12)	AluSg|SINE|Alu	28853	NM_021249	58533	Hs.276523	NM_021249	ENSG00000129515	SNX6	MSTP010|TFAF2	sorting nexin 6	protein-coding	SNX6
Yap_catlast-only89i_peak_3199	chr10	63388549	63388895	+	288	NA	Intergenic	Intergenic	-33997	NM_173554	219621	Hs.673160	NM_173554	ENSG00000183346	C10orf107	bA63A2.1	chromosome 10 open reading frame 107	protein-coding	C10orf107
Yap_catlast-only89i_peak_7969	chr13	41798258	41798491	+	288	NA	intron (NM_004294, intron 8 of 9)	intron (NM_004294, intron 8 of 9)	-29663	NM_032138	84078	Hs.63841	NM_032138	ENSG00000120696	KBTBD7	-	kelch repeat and BTB domain containing 7	protein-coding	KBTBD7
Yap_catlast-only89i_peak_15028	chr2	161693199	161693725	+	288	NA	Intergenic	Intergenic	-300004	NM_133484	10010	Hs.132257	NM_004180	ENSG00000136560	TANK	I-TRAF|ITRAF|TRAF2	TRAF family member associated NFKB activator	protein-coding
Yap_catlast-only89i_peak_28965	chrX	150094435	150094913	+	287	NA	Intergenic	MLT1D|LTR|ERVL-MaLR	-27385	NM_134446	83692	Hs.522805	NM_031462	ENSG00000102181	CD99L2	CD99B|MIC2L1	CD99 molecule like 2	protein-coding
Yap_catlast-only89i_peak_14353	chr2	45686377	45686617	+	287	NA	intron (NM_018079, intron 16 of 20)	intron (NM_018079, intron 16 of 20)	151936	NM_018079	55133	Hs.14229	NM_018079	ENSG00000068784	SRBD1	-	S1 RNA binding domain 1	protein-coding	SRBD1
Yap_catlast-only89i_peak_18169	chr3	76546856	76547174	+	287	NA	Intergenic	MLT2C2|LTR|ERVL	-542279	NM_001290039	6092	Hs.13305	NM_002942	ENSG00000185008	ROBO2	SAX3	roundabout guidance receptor 2	protein-coding
Yap_catlast-only89i_peak_20708	chr5	33788768	33789461	+	287	NA	intron (NM_030955, intron 2 of 23)	intron (NM_030955, intron 2 of 23)	103183	NM_001324512	81792	Hs.12680	NM_030955	ENSG00000151388	ADAMTS12	PRO4389	ADAM metallopeptidase with thrombospondin type 1 motif 12	protein-coding
Yap_catlast-only89i_peak_7880	chr13	31469888	31470312	+	287	NA	intron (NR_038287, intron 2 of 3)	intron (NR_038287, intron 2 of 3)	-10212	NM_032849	84935	Hs.147880	NM_032849	ENSG00000102802	MEDAG	AWMS3|C13orf33|MEDA-4|MEDA4|hAWMS3	mesenteric estrogen dependent adipogenesis	protein-coding	MEDAG
Yap_catlast-only89i_peak_15778	chr20	4206303	4206831	+	286	NA	intron (NM_000678, intron 1 of 1)	intron (NM_000678, intron 1 of 1)	23092	NM_000678	146	Hs.557	NM_000678	ENSG00000171873	ADRA1D	ADRA1|ADRA1A|ADRA1R|ALPHA1|DAR|dJ779E11.2	adrenoceptor alpha 1D	protein-coding	ADRA1D
Yap_catlast-only89i_peak_10690	chr16	68824035	68824478	+	286	NA	intron (NM_004360, intron 2 of 15)	intron (NM_004360, intron 2 of 15)	47837	NR_106988	102465753		NR_106988	ENSG00000280494	MIR7641-2	B-ATF|hsa-mir-7641-2	microRNA 7641-2	ncRNA	MIR7641-2
Yap_catlast-only89i_peak_13317	chr19	13962048	13962512	+	286	NA	Intergenic	Intergenic	-14807	NR_029495	407010		NR_029495	ENSG00000207980	MIR23A	MIRN23A|hsa-mir-23a|miRNA23A|mir-23a	microRNA 23a	ncRNA	MIR23A
Yap_catlast-only89i_peak_22078	chr5	172285734	172286555	+	285	NA	intron (NM_001031711, intron 1 of 9)	intron (NM_001031711, intron 1 of 9)	24921	NM_001031711	57222	Hs.509163	NM_020462	ENSG00000113719	ERGIC1	ERGIC-32|ERGIC32|NET24	endoplasmic reticulum-golgi intermediate compartment 1	protein-coding
Yap_catlast-only89i_peak_26634	chr8	103801153	103801703	+	285	NA	Intergenic	Intergenic	75000	NM_001301668	51582	Hs.459106	NM_015878	ENSG00000155096	AZIN1	AZI|AZIA1|OAZI|OAZIN|ODC1L	antizyme inhibitor 1	protein-coding
Yap_catlast-only89i_peak_12522	chr18	9803006	9803411	+	285	NA	intron (NM_006868, intron 3 of 6)	intron (NM_006868, intron 3 of 6)	-82515	NM_032243	84203	Hs.98712	NM_032243	ENSG00000168454	TXNDC2	SPTRX|SPTRX1	thioredoxin domain containing 2	protein-coding	TXNDC2
Yap_catlast-only89i_peak_13977	chr2	9427727	9428232	+	285	NA	intron (NM_001135191, intron 2 of 26)	intron (NM_001135191, intron 2 of 26)	81085	NM_003887	8853	Hs.555902	NM_003887	ENSG00000151693	ASAP2	AMAP2|CENTB3|DDEF2|PAG3|PAP|Pap-alpha|SHAG1	ArfGAP with SH3 domain, ankyrin repeat and PH domain 2	protein-coding	ASAP2
Yap_catlast-only89i_peak_10847	chr16	80208226	80208687	+	285	NA	intron (NR_120307, intron 2 of 5)	intron (NR_120307, intron 2 of 5)	-366175	NM_001305017	83657	Hs.98849	NM_130897	ENSG00000168589	DYNLRB2	DNCL2B|DNLC2B|ROBLD2	dynein light chain roadblock-type 2	protein-coding
Yap_catlast-only89i_peak_18250	chr3	100755049	100755484	+	285	NA	Intergenic	ERVL-int|LTR|ERVL	-42932	NM_015429	25890	Hs.477015	NM_015429	ENSG00000154175	ABI3BP	NESHBP|TARSH	ABI family member 3 binding protein	protein-coding	ABI3BP
Yap_catlast-only89i_peak_6449	chr12	19924674	19925161	+	285	NA	Intergenic	LTR78|LTR|ERV1	-242702	NR_040098	100506393	Hs.658356	NR_040098	ENSG00000256287	LOC100506393	-	uncharacterized LOC100506393	ncRNA	LOC100506393
Yap_catlast-only89i_peak_12207	chr17	69408935	69409254	+	285	NA	Intergenic	Intergenic	-210774	NR_104152	101928165	Hs.407613	NR_104152	ENSG00000260785	CASC17	LINC00600	cancer susceptibility candidate 17 (non-protein coding)	ncRNA	CASC17
Yap_catlast-only89i_peak_5748	chr11	102317303	102317772	+	285	NA	intron (NM_052932, intron 2 of 4)	intron (NM_052932, intron 2 of 4)	-6113	NR_135053	101928424	Hs.647210	NR_135053	ENSG00000255337	LOC101928424	-	uncharacterized LOC101928424	ncRNA
Yap_catlast-only89i_peak_16062	chr20	32321676	32322009	+	285	NA	intron (NR_104259, intron 1 of 13)	intron (NR_104259, intron 1 of 13)	2276	NM_001282935	84905	Hs.516989	NM_032819	ENSG00000131061	ZNF341	-	zinc finger protein 341	protein-coding
Yap_catlast-only89i_peak_1324	chr1	94167061	94167607	+	285	NA	intron (NM_001261408, intron 3 of 13)	intron (NM_001261408, intron 3 of 13)	-19940	NM_003567	8412	Hs.36958	NM_003567	ENSG00000137936	BCAR3	NSP2|SH2D3B	breast cancer anti-estrogen resistance 3	protein-coding	BCAR3
Yap_catlast-only89i_peak_7106	chr12	75709353	75709645	+	285	NA	intron (NM_001286547, intron 6 of 15)	intron (NM_001286547, intron 6 of 15)	14337	NM_032606	84698	Hs.733835	NM_032606	ENSG00000180881	CAPS2	UG0636c06	calcyphosine 2	protein-coding	CAPS2
Yap_catlast-only89i_peak_21421	chr5	119790055	119790473	+	285	NA	Intergenic	Intergenic	-9709	NM_016644	51334	Hs.157461	NM_016644	ENSG00000184838	PRR16	DSC54|LARGEN	proline rich 16	protein-coding	PRR16
Yap_catlast-only89i_peak_18055	chr3	63710687	63711126	+	284	NA	Intergenic	Intergenic	72562	NM_001080537	132203	Hs.130704	NM_001080537	ENSG00000188817	SNTN	S100A1L|S100AL|sentan	sentan, cilia apical structure protein	protein-coding	SNTN
Yap_catlast-only89i_peak_20137	chr4	143329181	143329700	+	284	NA	intron (NM_003866, intron 6 of 26)	AluSz6|SINE|Alu	438248	NM_003866	8821	Hs.176376	NM_003866	ENSG00000109452	INPP4B	-	inositol polyphosphate-4-phosphatase type II B	protein-coding	INPP4B
Yap_catlast-only89i_peak_20802	chr5	38783136	38783726	+	284	NA	intron (NR_109951, intron 2 of 3)	intron (NR_109951, intron 2 of 3)	62500	NR_109951	101929768	Hs.546623	NR_109951		OSMR-AS1	CTD-2127H9.1	OSMR antisense RNA 1 (head to head)	ncRNA	OSMR-AS1
Yap_catlast-only89i_peak_16838	chr21	43460392	43461110	+	284	NA	Intergenic	L2b|LINE|L2	18373	NR_027273	150142	Hs.143833	NM_198078	ENSG00000237232	ZNF295-AS1	C21orf121|NCRNA00318|PRED87	ZNF295 antisense RNA 1	ncRNA
Yap_catlast-only89i_peak_3437	chr10	76985330	76985695	+	283	NA	intron (NM_001184783, intron 10 of 11)	LTR23|LTR|ERV1	10258	NM_144589	118881	Hs.355333	NM_144589	ENSG00000165644	COMTD1	-	catechol-O-methyltransferase domain containing 1	protein-coding	COMTD1
Yap_catlast-only89i_peak_27231	chr9	5509422	5509990	+	283	NA	promoter-TSS (NM_025239)	promoter-TSS (NM_025239)	-839	NM_025239	80380	Hs.532279	NM_025239	ENSG00000197646	PDCD1LG2	B7DC|Btdc|CD273|PD-L2|PDCD1L2|PDL2|bA574F11.2	programmed cell death 1 ligand 2	protein-coding	PDCD1LG2
Yap_catlast-only89i_peak_26504	chr8	96660333	96660871	+	283	NA	intron (NR_038205, intron 2 of 2)	intron (NR_038205, intron 2 of 2)	299974	NR_036611	100500773	Hs.741582	NR_036611		LOC100500773	-	serine and arginine rich splicing factor 3 pseudogene	pseudo	LOC100500773
Yap_catlast-only89i_peak_7038	chr12	66539044	66539331	+	283	NA	intron (NM_001282610, intron 5 of 6)	intron (NM_001282610, intron 5 of 6)	-14654	NM_032338	84298	Hs.504820	NM_032338	ENSG00000139233	LLPH	C12orf31|hLLP	LLP homolog, long-term synaptic facilitation	protein-coding	LLPH
Yap_catlast-only89i_peak_20045	chr4	129146275	129146660	+	282	NA	Intergenic	MLT1J1|LTR|ERVL-MaLR	63517	NM_006320	10424	Hs.507910	NM_006320	ENSG00000164040	PGRMC2	DG6|PMBP	progesterone receptor membrane component 2	protein-coding	PGRMC2
Yap_catlast-only89i_peak_8372	chr14	20810732	20811053	+	282	NA	promoter-TSS (NM_005484)	promoter-TSS (NM_005484)	678	NR_002312	85495	Hs.613102	NR_002312	ENSG00000277209	RPPH1	H1RNA|RPPH1-1	ribonuclease P RNA component H1	ncRNA	RPPH1
Yap_catlast-only89i_peak_3837	chr10	101969143	101969451	+	281	NA	intron (NM_001320928, intron 10 of 20)	intron (NM_001320928, intron 10 of 20)	20070	NM_001278	1147	Hs.198998	NM_001278	ENSG00000213341	CHUK	IKBKA|IKK-alpha|IKK1|IKKA|NFKBIKA|TCF16	conserved helix-loop-helix ubiquitous kinase	protein-coding	CHUK
Yap_catlast-only89i_peak_4414	chr11	9385707	9386156	+	281	NA	Intergenic	CpG	-20238	NM_006391	10527	Hs.744911	NM_006391	ENSG00000205339	IPO7	Imp7|RANBP7	importin 7	protein-coding	IPO7
Yap_catlast-only89i_peak_26058	chr8	37728948	37729430	+	281	NA	exon (NM_001002814, exon 4 of 6)	exon (NM_001002814, exon 4 of 6)	-21758	NM_018310	55290	Hs.709301	NM_018310	ENSG00000104221	BRF2	BRFU|TFIIIB50	BRF2, RNA polymerase III transcription initiation factor subunit	protein-coding	BRF2
Yap_catlast-only89i_peak_25043	chr7	100760580	100761034	+	281	NA	Intergenic	Intergenic	-9563	NM_000602	5054	Hs.414795	NM_000602	ENSG00000106366	SERPINE1	PAI|PAI-1|PAI1|PLANH1	serpin family E member 1	protein-coding	SERPINE1
Yap_catlast-only89i_peak_8769	chr14	61932852	61933369	+	281	NA	intron (NM_006255, intron 9 of 13)	intron (NM_006255, intron 9 of 13)	103802	NR_110417	101927780	Hs.254789	NR_110416	ENSG00000250548	LOC101927780	-	uncharacterized LOC101927780	ncRNA
Yap_catlast-only89i_peak_4234	chr10	131925955	131926521	+	281	NA	Intergenic	Intergenic	-8401	NM_006541	10539	Hs.42644	NM_006541	ENSG00000108010	GLRX3	GLRX4|GRX3|GRX4|PICOT|TXNL2|TXNL3	glutaredoxin 3	protein-coding	GLRX3
Yap_catlast-only89i_peak_20008	chr4	123704383	123704885	+	281	NA	Intergenic	Intergenic	-43229	NM_002006	2247	Hs.284244	NM_002006	ENSG00000138685	FGF2	BFGF|FGF-2|FGFB|HBGF-2	fibroblast growth factor 2	protein-coding	FGF2
Yap_catlast-only89i_peak_8681	chr14	55118996	55119293	+	281	NA	intron (NM_015589, intron 1 of 11)	intron (NM_015589, intron 1 of 11)	84814	NM_015589	23034	Hs.98259	NM_015589	ENSG00000020577	SAMD4A	SAMD4|SMAUG|SMAUG1|SMG|SMGA	sterile alpha motif domain containing 4A	protein-coding	SAMD4A
Yap_catlast-only89i_peak_6333	chr12	8123202	8123540	+	281	NA	Intergenic	CpG	-34479	NM_006931	6515	Hs.419240	NM_006931	ENSG00000059804	SLC2A3	GLUT3	solute carrier family 2 member 3	protein-coding	SLC2A3
Yap_catlast-only89i_peak_15245	chr2	192265918	192266343	+	280	NA	intron (NM_001330238, intron 23 of 29)	intron (NM_001330238, intron 23 of 29)	156128	NM_001161819	4430	Hs.439620	NM_012223	ENSG00000128641	MYO1B	MMI-alpha|MMIa|MYH-1c|myr1	myosin IB	protein-coding
Yap_catlast-only89i_peak_22092	chr5	172382587	172382964	+	280	NA	non-coding (NR_026682, exon 4 of 4)	non-coding (NR_026682, exon 4 of 4)	-2957	NM_001317981	51121	Hs.546390	NM_016093	ENSG00000037241	RPL26L1	RPL26P1	ribosomal protein L26 like 1	protein-coding
Yap_catlast-only89i_peak_4520	chr11	12254298	12254745	+	280	NA	intron (NR_144420, intron 15 of 27)	Tigger7|DNA|TcMar-Tigger	-53926	NM_032867	84953	Hs.128196	NM_032867	ENSG00000133808	MICALCL	Ebitein1	MICAL C-terminal like	protein-coding	MICALCL
Yap_catlast-only89i_peak_13501	chr19	36009199	36009538	+	280	NA	Intergenic	Intergenic	-4808	NM_001126057	93099	Hs.417795	NM_033317	ENSG00000161249	DMKN	UNQ729|ZD52F10	dermokine	protein-coding
Yap_catlast-only89i_peak_24767	chr7	75194441	75194887	+	280	NA	intron (NM_005338, intron 9 of 30)	intron (NM_005338, intron 9 of 30)	-37211	NR_028059	5387	Hs.659871	NM_005395	ENSG00000127957	PMS2P3	PMS2L3|PMS2L9|PMS5|PMSR3	PMS1 homolog 2, mismatch repair system component pseudogene 3	pseudo
Yap_catlast-only89i_peak_27378	chr9	22103261	22103835	+	279	NA	intron (NR_003529, intron 14 of 18)	intron (NR_003529, intron 14 of 18)	-94236	NM_078487	1030	Hs.72901	NM_004936	ENSG00000147883	CDKN2B	CDK4I|INK4B|MTS2|P15|TP15|p15INK4b	cyclin dependent kinase inhibitor 2B	protein-coding
Yap_catlast-only89i_peak_19575	chr4	39707881	39708201	+	279	NA	intron (NM_001111113, intron 1 of 4)	AluSx|SINE|Alu	8377	NM_001312647	3093	Hs.50308	NM_005339	ENSG00000078140	UBE2K	E2-25K|HIP2|HYPG|LIG|UBC1	ubiquitin conjugating enzyme E2 K	protein-coding
Yap_catlast-only89i_peak_19020	chr3	177196310	177196757	+	279	NA	intron (NR_047568, intron 1 of 3)	intron (NR_047568, intron 1 of 3)	36824	NR_047568	100505566	Hs.581170	NR_047568		LINC00578	-	long intergenic non-protein coding RNA 578	ncRNA	LINC00578
Yap_catlast-only89i_peak_11507	chr17	19234565	19234821	+	279	NA	intron (NM_001102664, intron 6 of 7)	intron (NM_001102664, intron 6 of 7)	13194	NR_031591	100302256		NR_031591	ENSG00000221540	MIR1180	MIRN1180|hsa-mir-1180|mir-1180	microRNA 1180	ncRNA	MIR1180
Yap_catlast-only89i_peak_22929	chr6	39852419	39852822	+	278	NA	intron (NM_001201427, intron 15 of 24)	intron (NM_001201427, intron 15 of 24)	12536	NR_125831	100505635	Hs.668513	NR_125831	ENSG00000235033	LOC100505635	-	uncharacterized LOC100505635	ncRNA	LOC100505635
Yap_catlast-only89i_peak_330	chr1	19336462	19336822	+	278	NA	Intergenic	Intergenic	-53816	NM_001136265	126917	Hs.466625	NM_001136265	ENSG00000169991	IFFO2	-	intermediate filament family orphan 2	protein-coding	IFFO2
Yap_catlast-only89i_peak_21590	chr5	135393613	135394493	+	277	NA	intron (NM_000358, intron 12 of 16)	intron (NM_000358, intron 12 of 16)	22234	NR_030583	100126299		NR_030583	ENSG00000270123	VTRNA2-1	CBL-3|CBL3|MIR886|MIRN886|VTRNA2|hsa-mir-886|hvg-5|nc886|svtRNA2-1a	vault RNA 2-1	ncRNA	VTRNA2-1
Yap_catlast-only89i_peak_4778	chr11	35651487	35652033	+	276	NA	Intergenic	Intergenic	12025	NM_014344	24147	Hs.39384	NM_014344	ENSG00000179431	FJX1	-	four jointed box 1	protein-coding	FJX1
Yap_catlast-only89i_peak_24664	chr7	65337676	65337942	+	276	NA	promoter-TSS (NM_173517)	promoter-TSS (NM_173517)	-277	NM_173517	154807	Hs.427232	NM_173517	ENSG00000196715	VKORC1L1	-	vitamin K epoxide reductase complex subunit 1 like 1	protein-coding	VKORC1L1
Yap_catlast-only89i_peak_18759	chr3	149057711	149058088	+	276	NA	Intergenic	Intergenic	-6351	NM_138786	116441	Hs.22026	NM_138786	ENSG00000163762	TM4SF18	L6D	transmembrane 4 L six family member 18	protein-coding	TM4SF18
Yap_catlast-only89i_peak_13004	chr19	1252413	1252840	+	276	NA	intron (NM_177401, intron 4 of 7)	intron (NM_177401, intron 4 of 7)	4074	NM_177401	90007	Hs.465529	NM_177401	ENSG00000167470	MIDN	-	midnolin	protein-coding	MIDN
Yap_catlast-only89i_peak_15650	chr2	238223796	238224215	+	276	NA	Intergenic	Intergenic	98845	NM_057167	1293	Hs.233240	NM_004369	ENSG00000163359	COL6A3	BTHLM1|DYT27|UCMD1	collagen type VI alpha 3 chain	protein-coding
Yap_catlast-only89i_peak_11705	chr17	36620758	36621281	+	276	NA	intron (NM_001199417, intron 6 of 23)	intron (NM_001199417, intron 6 of 23)	36299	NM_001199417	57636	Hs.374446	NM_020876	ENSG00000275832	ARHGAP23	-	Rho GTPase activating protein 23	protein-coding
Yap_catlast-only89i_peak_22168	chr5	176964828	176965106	+	276	NA	exon (NM_001190946, exon 3 of 9)	exon (NM_001190946, exon 3 of 9)	16619	NR_024019	54540	Hs.484289	NM_019057	ENSG00000146067	FAM193B	IRIZIO	family with sequence similarity 193 member B	protein-coding
Yap_catlast-only89i_peak_23920	chr6	160181630	160182010	+	276	NA	non-coding (NR_037166, exon 2 of 2)	non-coding (NR_037166, exon 2 of 2)	-1169	NM_005891	39	Hs.571037	NM_005891	ENSG00000120437	ACAT2	-	acetyl-CoA acetyltransferase 2	protein-coding	ACAT2
Yap_catlast-only89i_peak_14058	chr2	18229165	18229536	+	276	NA	Intergenic	MIRc|SINE|MIR	169426	NM_002252	3790	Hs.414489	NM_002252	ENSG00000170745	KCNS3	KV9.3	potassium voltage-gated channel modifier subfamily S member 3	protein-coding	KCNS3
Yap_catlast-only89i_peak_2145	chr1	205144447	205145077	+	276	NA	intron (NM_015375, intron 2 of 12)	intron (NM_015375, intron 2 of 12)	35965	NM_015375	25778	Hs.6874	NM_015375	ENSG00000133059	DSTYK	CAKUT1|DustyPK|HDCMD38P|RIP5|RIPK5	dual serine/threonine and tyrosine protein kinase	protein-coding	DSTYK
Yap_catlast-only89i_peak_19194	chr3	192597390	192597814	+	276	NA	intron (NM_178496, intron 1 of 1)	intron (NM_178496, intron 1 of 1)	38348	NM_178496	151963	Hs.151443	NM_178496	ENSG00000180611	MB21D2	C3orf59	Mab-21 domain containing 2	protein-coding	MB21D2
Yap_catlast-only89i_peak_8142	chr13	74778726	74779328	+	275	NA	Intergenic	Intergenic	-26554	NR_144451	100507612	Hs.447508	NR_144451		LINC00402	-	long intergenic non-protein coding RNA 402	ncRNA
Yap_catlast-only89i_peak_24240	chr7	22622838	22623269	+	275	NA	Intergenic	MLT1G1|LTR|ERVL-MaLR	20097	NR_038393	100506178	Hs.668122	NR_038393	ENSG00000232759	LOC100506178	-	uncharacterized LOC100506178	ncRNA	LOC100506178
Yap_catlast-only89i_peak_28742	chrX	71145018	71145309	+	275	NA	intron (NM_001013627, intron 1 of 7)	L2c|LINE|L2	14225	NM_001013627	340527	Hs.397836	NM_001013627	ENSG00000204131	NHSL2	-	NHS like 2	protein-coding	NHSL2
Yap_catlast-only89i_peak_18414	chr3	122765092	122765630	+	275	NA	Intergenic	L2c|LINE|L2	-17909	NR_046079	54437	Hs.210870	NM_018987	ENSG00000082684	SEMA5B	SEMAG|SemG	semaphorin 5B	protein-coding
Yap_catlast-only89i_peak_19897	chr4	99981301	99981829	+	275	NA	intron (NM_015143, intron 10 of 10)	AluY|SINE|Alu	28374	NM_000671	128	Hs.78989	NM_000671	ENSG00000197894	ADH5	ADH-3|ADHX|FALDH|FDH|GSH-FDH|GSNOR|HEL-S-60p	alcohol dehydrogenase 5 (class III), chi polypeptide	protein-coding	ADH5
Yap_catlast-only89i_peak_23749	chr6	139908583	139909051	+	275	NA	Intergenic	Intergenic	-113084	NR_033919	645434	Hs.666240	NR_033919	ENSG00000238099	LINC01625	-	long intergenic non-protein coding RNA 1625	ncRNA
Yap_catlast-only89i_peak_12063	chr17	58159844	58160223	+	275	NA	TTS (NR_030732)	TTS (NR_030732)	3363	NR_135648	105371849	Hs.621935	NR_135648	ENSG00000267416	LOC105371849	-	uncharacterized LOC105371849	ncRNA
Yap_catlast-only89i_peak_27526	chr9	71891666	71892038	+	275	NA	Intergenic	Intergenic	30120	NR_047671	100885775	Hs.49768	NR_047671		BANCR	LINC00586	BRAF-activated non-protein coding RNA	ncRNA	BANCR
Yap_catlast-only89i_peak_15354	chr2	204648543	204648941	+	274	NA	Intergenic	Intergenic	77544	NM_001243077	940	Hs.443123	NM_006139	ENSG00000178562	CD28	Tp44	CD28 molecule	protein-coding
Yap_catlast-only89i_peak_19408	chr4	10607467	10607740	+	274	NA	intron (NM_052964, intron 2 of 18)	Tigger3b|DNA|TcMar-Tigger	78783	NM_052964	116449	Hs.678910	NM_052964	ENSG00000109684	CLNK	MIST	cytokine dependent hematopoietic cell linker	protein-coding	CLNK
Yap_catlast-only89i_peak_17741	chr3	31212740	31213135	+	274	NA	Intergenic	Intergenic	-9658	NR_130459	100423038		NR_130459	ENSG00000265376	MIR466	hsa-mir-466	microRNA 466	ncRNA	MIR466
Yap_catlast-only89i_peak_8822	chr14	65225397	65225765	+	274	NA	intron (NM_001024858, intron 31 of 34)	intron (NM_001024858, intron 31 of 34)	26823	NR_107009	102465841		NR_107009	ENSG00000070182	MIR7855	hsa-mir-7855	microRNA 7855	ncRNA	MIR7855
Yap_catlast-only89i_peak_1944	chr1	181046761	181047126	+	274	NA	Intergenic	Intergenic	-10695	NM_016545	51278	Hs.15725	NM_016545	ENSG00000162783	IER5	SBBI48	immediate early response 5	protein-coding	IER5
Yap_catlast-only89i_peak_20743	chr5	34811817	34812143	+	273	NA	exon (NM_001145525, exon 11 of 20)	exon (NM_001145525, exon 11 of 20)	9557	NR_106988	102465753		NR_106988	ENSG00000280494	MIR7641-2	B-ATF|hsa-mir-7641-2	microRNA 7641-2	ncRNA	MIR7641-2
Yap_catlast-only89i_peak_11893	chr17	45344628	45345103	+	273	NA	intron (NM_000212, intron 1 of 14)	intron (NM_000212, intron 1 of 14)	13657	NM_000212	3690	Hs.218040	NM_000212	ENSG00000259207	ITGB3	BDPLT16|BDPLT2|CD61|GP3A|GPIIIa|GT	integrin subunit beta 3	protein-coding	ITGB3
Yap_catlast-only89i_peak_16389	chr20	48178810	48179200	+	273	NA	intron (NM_000961, intron 1 of 9)	intron (NM_000961, intron 1 of 9)	5702	NM_000961	5740	Hs.302085	NM_000961	ENSG00000124212	PTGIS	CYP8|CYP8A1|PGIS|PTGI	prostaglandin I2 synthase	protein-coding	PTGIS
Yap_catlast-only89i_peak_3653	chr10	92690769	92691433	+	273	NA	Intergenic	Intergenic	-10069	NM_014391	27063	Hs.448589	NM_014391	ENSG00000148677	ANKRD1	ALRP|C-193|CARP|CVARP|MCARP|bA320F15.2	ankyrin repeat domain 1	protein-coding	ANKRD1
Yap_catlast-only89i_peak_10959	chr16	85548451	85549043	+	273	NA	Intergenic	Intergenic	-96282	NM_001134473	23199	Hs.461647	NM_014615	ENSG00000131149	GSE1	CRHSP24|KIAA0182	Gse1 coiled-coil protein	protein-coding
Yap_catlast-only89i_peak_11347	chr17	8288085	8288891	+	273	NA	Intergenic	L2a|LINE|L2	-1923	NM_000987	6154	Hs.482144	NM_000987	ENSG00000161970	RPL26	DBA11|L26	ribosomal protein L26	protein-coding	RPL26
Yap_catlast-only89i_peak_20303	chr4	170258658	170259052	+	273	NA	Intergenic	HERVL40-int|LTR|ERVL	-66606	NM_020870	57630	Hs.301804	NM_020870	ENSG00000154447	SH3RF1	POSH|RNF142|SH3MD2	SH3 domain containing ring finger 1	protein-coding	SH3RF1
Yap_catlast-only89i_peak_5522	chr11	77490959	77491371	+	273	NA	intron (NM_016578, intron 1 of 15)	L2c|LINE|L2	40715	NM_016578	51773	Hs.420229	NM_016578	ENSG00000048649	RSF1	HBXAP|RSF-1|XAP8|p325	remodeling and spacing factor 1	protein-coding	RSF1
Yap_catlast-only89i_peak_6704	chr12	49637753	49638317	+	272	NA	intron (NM_001303114, intron 1 of 3)	intron (NM_001303114, intron 1 of 3)	16326	NM_001303114	84790	Hs.652390	NM_032704	ENSG00000167553	TUBA1C	TUBA6|bcm948	tubulin alpha 1c	protein-coding
Yap_catlast-only89i_peak_13688	chr19	45129115	45129681	+	272	NA	intron (NM_001205280, intron 2 of 4)	intron (NM_001205280, intron 2 of 4)	12458	NM_001205280	147710	Hs.512509	NM_001205280	ENSG00000216588	IGSF23	-	immunoglobulin superfamily member 23	protein-coding	IGSF23
Yap_catlast-only89i_peak_15525	chr2	227342648	227343162	+	272	NA	Intergenic	Intergenic	180604	NR_049887	100847053		NR_049887	ENSG00000263363	MIR5702	-	microRNA 5702	ncRNA	MIR5702
Yap_catlast-only89i_peak_21184	chr5	81147525	81148012	+	272	NA	Intergenic	Intergenic	-100696	NM_001345886	23635	Hs.102735	NM_012446	ENSG00000145687	SSBP2	HSPC116|SOSS-B2	single stranded DNA binding protein 2	protein-coding
Yap_catlast-only89i_peak_12483	chr18	8125113	8125457	+	272	NA	intron (NM_001105244, intron 13 of 32)	intron (NM_001105244, intron 13 of 32)	241747	NR_024419	100192426	Hs.666655	NR_024419	ENSG00000266149	LOC100192426	-	uncharacterized LOC100192426	ncRNA	LOC100192426
Yap_catlast-only89i_peak_319	chr1	18091976	18092496	+	272	NA	intron (NM_030812, intron 1 of 2)	L2a|LINE|L2	10428	NM_030812	81569	Hs.2149	NM_030812	ENSG00000117148	ACTL8	CT57	actin like 8	protein-coding	ACTL8
Yap_catlast-only89i_peak_26612	chr8	102110647	102111082	+	272	NA	Intergenic	L2a|LINE|L2	46582	NR_033962	441374	Hs.652045	NR_033962	ENSG00000248599	FLJ42969	-	uncharacterized LOC441374	ncRNA	FLJ42969
Yap_catlast-only89i_peak_26222	chr8	51052258	51052542	+	272	NA	intron (NM_001321777, intron 1 of 15)	intron (NM_001321777, intron 1 of 15)	-24291	NM_001321778	54212	Hs.584914	NM_018967	ENSG00000147481	SNTG1	G1SYN|SYN4	syntrophin gamma 1	protein-coding
Yap_catlast-only89i_peak_18955	chr3	170407347	170407767	+	271	NA	intron (NR_135556, intron 2 of 5)	intron (NR_135556, intron 2 of 5)	-103694	NM_020949	57709	Hs.596660	NM_020949	ENSG00000013293	SLC7A14	PPP1R142	solute carrier family 7 member 14	protein-coding	SLC7A14
Yap_catlast-only89i_peak_11505	chr17	19230332	19230914	+	271	NA	intron (NM_001102664, intron 4 of 7)	L1ME3D|LINE|L1	17264	NR_031591	100302256		NR_031591	ENSG00000221540	MIR1180	MIRN1180|hsa-mir-1180|mir-1180	microRNA 1180	ncRNA	MIR1180
Yap_catlast-only89i_peak_6578	chr12	31671707	31672152	+	271	NA	intron (NM_001308339, intron 1 of 22)	intron (NM_001308339, intron 1 of 22)	-70928	NR_046909	100874249	Hs.627628	NR_046909	ENSG00000255867	DENND5B-AS1	-	DENND5B antisense RNA 1	ncRNA	DENND5B-AS1
Yap_catlast-only89i_peak_11213	chr17	3571235	3571701	+	271	NA	promoter-TSS (NM_001014764)	promoter-TSS (NM_001014764)	505	NM_014604	30851	Hs.12956	NM_014604	ENSG00000213977	TAX1BP3	TIP-1|TIP1	Tax1 binding protein 3	protein-coding	TAX1BP3
Yap_catlast-only89i_peak_13188	chr19	10138369	10138651	+	271	NA	Intergenic	CpG	-10520	NR_049855	100847093		NR_049855	ENSG00000266204	MIR5589	-	microRNA 5589	ncRNA	MIR5589
Yap_catlast-only89i_peak_25848	chr8	23211350	23211890	+	271	NA	intron (NM_002318, intron 3 of 13)	intron (NM_002318, intron 3 of 13)	17899	NR_038323	100507156	Hs.661130	NR_038323	ENSG00000253837	LOC100507156	-	uncharacterized LOC100507156	ncRNA	LOC100507156
Yap_catlast-only89i_peak_20915	chr5	53359633	53359943	+	270	NA	intron (NM_019087, intron 4 of 4)	intron (NM_019087, intron 4 of 4)	11625	NR_039664	100616233		NR_039664	ENSG00000265421	MIR4459	-	microRNA 4459	ncRNA	MIR4459
Yap_catlast-only89i_peak_28482	chrX	13416448	13416955	+	270	NA	Intergenic	Intergenic	63341	NR_045260	100133123	Hs.449499	NR_045260	ENSG00000226985	LINC01203	-	long intergenic non-protein coding RNA 1203	ncRNA	LINC01203
Yap_catlast-only89i_peak_15932	chr20	19973603	19974104	+	270	NA	intron (NM_001242581, intron 10 of 11)	intron (NM_001242581, intron 10 of 11)	-24081	NM_181528	51126	Hs.368783	NM_016100	ENSG00000173418	NAA20	NAT3|NAT3P|NAT5|NAT5P|dJ1002M8.1	N(alpha)-acetyltransferase 20, NatB catalytic subunit	protein-coding
Yap_catlast-only89i_peak_24545	chr7	46525054	46525431	+	270	NA	Intergenic	Intergenic	211478	NR_134575	730338	Hs.640207	NR_134575	ENSG00000233539	LOC730338	-	uncharacterized LOC730338	ncRNA
Yap_catlast-only89i_peak_4054	chr10	116585420	116586080	+	270	NA	intron (NM_001135051, intron 1 of 16)	intron (NM_001135051, intron 1 of 16)	4247	NM_020940	57700	Hs.192619	NM_020940	ENSG00000151553	FAM160B1	KIAA1600|bA106M7.3	family with sequence similarity 160 member B1	protein-coding	FAM160B1
Yap_catlast-only89i_peak_28044	chr9	117908899	117909248	+	269	NA	intron (NM_017418, intron 1 of 7)	intron (NM_017418, intron 1 of 7)	4976	NM_017418	50514	Hs.148841	NM_017418	ENSG00000173077	2018-12-01	CTS9	deleted in esophageal cancer 1	protein-coding	2018-12-01
Yap_catlast-only89i_peak_27884	chr9	110045181	110045659	+	269	NA	promoter-TSS (NM_002874)	promoter-TSS (NM_002874)	-97	NM_002874	5887	Hs.521640	NM_002874	ENSG00000119318	RAD23B	HHR23B|HR23B|P58	RAD23 homolog B, nucleotide excision repair protein	protein-coding	RAD23B
Yap_catlast-only89i_peak_5469	chr11	75270135	75270504	+	269	NA	Intergenic	Intergenic	-2782	NM_001207014	871	Hs.596449	NM_001235	ENSG00000149257	SERPINH1	AsTP3|CBP1|CBP2|HSP47|OI10|PIG14|PPROM|RA-A47|SERPINH2|gp46	serpin family H member 1	protein-coding
Yap_catlast-only89i_peak_24824	chr7	78912490	78912924	+	268	NA	intron (NM_001301128, intron 1 of 20)	intron (NM_001301128, intron 1 of 20)	-169566	NR_038346	100505881	Hs.31474	NR_038343	ENSG00000234456	MAGI2-AS3	-	MAGI2 antisense RNA 3	ncRNA
Yap_catlast-only89i_peak_9088	chr14	79720412	79720754	+	268	NA	intron (NM_001330195, intron 15 of 20)	intron (NM_001330195, intron 15 of 20)	-25099	NM_138970	9369	Hs.368307	NM_004796	ENSG00000021645	NRXN3	C14orf60	neurexin 3	protein-coding
Yap_catlast-only89i_peak_7310	chr12	97256111	97256494	+	268	NA	intron (NM_001306084, intron 67 of 67)	L2a|LINE|L2	-44699	NM_001135177	121441	Hs.270084	NM_152905	ENSG00000139350	NEDD1	GCP-WD|TUBGCP7	neural precursor cell expressed, developmentally down-regulated 1	protein-coding
Yap_catlast-only89i_peak_21307	chr5	97803854	97804164	+	268	NA	Intergenic	L1PA17|LINE|L1	-300990	NM_001012761	285704	Hs.526902	NM_173670	ENSG00000174136	RGMB	DRAGON	repulsive guidance molecule family member b	protein-coding
Yap_catlast-only89i_peak_788	chr1	41961806	41962369	+	268	NA	Intergenic	CpG	-11733	NM_001956	1907	Hs.1407	NM_001956	ENSG00000127129	EDN2	ET-2|ET2|PPET2	endothelin 2	protein-coding	EDN2
Yap_catlast-only89i_peak_9093	chr14	80062820	80063362	+	268	NA	intron (NM_001105250, intron 2 of 6)	LTR19A|LTR|ERV1	317409	NR_073546	9369	Hs.368307	NM_004796	ENSG00000021645	NRXN3	C14orf60	neurexin 3	protein-coding
Yap_catlast-only89i_peak_24700	chr7	66506414	66506899	+	268	NA	intron (NM_018264, intron 7 of 15)	intron (NM_018264, intron 7 of 15)	44864	NR_134540	55253	Hs.520917	NM_018264	ENSG00000198874	TYW1	RSAFD1|TYW1A|YPL207W	tRNA-yW synthesizing protein 1 homolog	protein-coding
Yap_catlast-only89i_peak_6058	chr11	126223904	126224311	+	268	NA	intron (NR_033839, intron 1 of 1)	AluSc|SINE|Alu	1375	NR_033839	399972	Hs.585206	NR_033839		ST3GAL4-AS1	DCPS-AS1	ST3GAL4 antisense RNA 1 (head to head)	ncRNA	ST3GAL4-AS1
Yap_catlast-only89i_peak_4015	chr10	113897111	113897526	+	268	NA	Intergenic	Intergenic	46219	NM_001244949	57678	Hs.42586	NM_020918	ENSG00000119927	GPAM	GPAT|GPAT1	glycerol-3-phosphate acyltransferase, mitochondrial	protein-coding
Yap_catlast-only89i_peak_18805	chr3	151022797	151023329	+	268	NA	intron (NM_023915, intron 1 of 2)	intron (NM_023915, intron 1 of 2)	11573	NM_023915	53836	Hs.591292	NM_023915	ENSG00000138271	GPR87	FKSG78|GPR95|KPG_002	G protein-coupled receptor 87	protein-coding	GPR87
Yap_catlast-only89i_peak_14929	chr2	150590565	150590865	+	268	NA	intron (NR_110240, intron 1 of 2)	intron (NR_110240, intron 1 of 2)	-146385	NM_015702	27249	Hs.5324	NM_015702	ENSG00000168288	MMADHC	C2orf25|CL25022|cblD	methylmalonic aciduria and homocystinuria, cblD type	protein-coding	MMADHC
Yap_catlast-only89i_peak_26236	chr8	54866459	54866822	+	268	NA	exon (NM_001286673, exon 4 of 5)	exon (NM_001286673, exon 4 of 5)	68376	NM_201437	6917	Hs.491745	NM_006756	ENSG00000187735	TCEA1	GTF2S|SII|TCEA|TF2S|TFIIS	transcription elongation factor A1	protein-coding
Yap_catlast-only89i_peak_22684	chr6	30811839	30812170	+	267	NA	intron (NR_134610, intron 2 of 2).2	intron (NR_134610, intron 2 of 2).2	3932	NR_134610	105375014	Hs.551770	NR_134610	ENSG00000237923	LOC105375014	-	uncharacterized LOC105375014	ncRNA
Yap_catlast-only89i_peak_25354	chr7	130571899	130572398	+	267	NA	intron (NR_110472, intron 2 of 3)	intron (NR_110472, intron 2 of 3)	-9850	NR_029517	407024		NR_029517	ENSG00000226380	MIR29B1	MIRN29B1|miR-29b|miRNA29B1|mir-29b-1	microRNA 29b-1	ncRNA	MIR29B1
Yap_catlast-only89i_peak_2736	chr10	17101278	17101727	+	267	NA	intron (NM_001081, intron 22 of 66)	intron (NM_001081, intron 22 of 66)	70314	NM_001081	8029	Hs.166206	NM_001081	ENSG00000107611	CUBN	IFCR|MGA1|gp280	cubilin	protein-coding	CUBN
Yap_catlast-only89i_peak_574	chr1	28764406	28764819	+	266	NA	promoter-TSS (NM_023923)	promoter-TSS (NM_023923)	-49	NM_023923	65979	Hs.225641	NM_023923	ENSG00000204138	PHACTR4	PPP1R124	phosphatase and actin regulator 4	protein-coding	PHACTR4
Yap_catlast-only89i_peak_28847	chrX	112021799	112021898	+	266	NA	exon (NM_001113490, exon 11 of 11)	exon (NM_001113490, exon 11 of 11)	2168	NR_036255	100423009		NR_036255	ENSG00000126016	MIR4329	-	microRNA 4329	ncRNA	MIR4329
Yap_catlast-only89i_peak_23792	chr6	143508363	143508639	+	266	NA	intron (NM_001286587, intron 4 of 6)	intron (NM_001286587, intron 4 of 6)	126522	NM_016108	51390	Hs.567501	NM_016108	ENSG00000146416	AIG1	AIG-1|dJ95L4.1	androgen induced 1	protein-coding	AIG1
Yap_catlast-only89i_peak_22025	chr5	168587991	168588656	+	266	NA	intron (NM_003062, intron 4 of 35)	intron (NM_003062, intron 4 of 35)	102375	NR_030311	693170		NR_030311	ENSG00000207619	MIR585	MIRN585|hsa-mir-585|mir-585	microRNA 585	ncRNA	MIR585
Yap_catlast-only89i_peak_17780	chr3	37977658	37978187	+	266	NA	intron (NM_001008392, intron 1 of 7)	intron (NM_001008392, intron 1 of 7)	-32973	NR_029499	407015		NR_029499	ENSG00000199075	MIR26A1	MIR26A|MIRN26A1|mir-26a-1	microRNA 26a-1	ncRNA	MIR26A1
Yap_catlast-only89i_peak_24862	chr7	83097565	83098063	+	266	NA	intron (NM_001178129, intron 3 of 16)	intron (NM_001178129, intron 3 of 16)	172933	NM_001178129	9723	Hs.528721	NM_012431	ENSG00000170381	SEMA3E	M-SEMAH|M-SemaK|SEMAH|coll-5	semaphorin 3E	protein-coding
Yap_catlast-only89i_peak_28094	chr9	123492860	123493266	+	266	NA	Intergenic	Intergenic	-16298	NM_001080497	1955	Hs.744903	NM_001080497	ENSG00000106780	MEGF9	EGFL5	multiple EGF like domains 9	protein-coding	MEGF9
Yap_catlast-only89i_peak_13048	chr19	2627477	2627913	+	266	NA	intron (NM_052847, intron 2 of 4)	intron (NM_052847, intron 2 of 4)	-3018	NR_107004	102465838		NR_107004	ENSG00000277904	MIR7850	hsa-mir-7850	microRNA 7850	ncRNA	MIR7850
Yap_catlast-only89i_peak_14581	chr2	84720628	84720971	+	266	NA	Intergenic	Intergenic	-22780	NM_001370	1768	Hs.249972	NM_001370	ENSG00000115423	DNAH6	DNHL1|Dnahc6|HL-2|HL2	dynein axonemal heavy chain 6	protein-coding	DNAH6
Yap_catlast-only89i_peak_1269	chr1	88421673	88422106	+	266	NA	Intergenic	Intergenic	-584551	NR_038324	100505768	Hs.125247	NR_038324	ENSG00000227290	LINC01364	-	long intergenic non-protein coding RNA 1364	ncRNA	LINC01364
Yap_catlast-only89i_peak_15466	chr2	220006896	220007344	+	266	NA	intron (NM_024782, intron 5 of 7)	intron (NM_024782, intron 5 of 7)	18467	NM_024782	79840	Hs.225988	NM_024782	ENSG00000187736	NHEJ1	XLF	non-homologous end joining factor 1	protein-coding	NHEJ1
Yap_catlast-only89i_peak_6359	chr12	12426433	12426849	+	266	NA	Intergenic	AluSx3|SINE|Alu	-6830	NM_002336	4040	Hs.584775	NM_002336	ENSG00000070018	LRP6	ADCAD2|STHAG7	LDL receptor related protein 6	protein-coding	LRP6
Yap_catlast-only89i_peak_7010	chr12	65919604	65920121	+	266	NA	intron (NR_120432, intron 4 of 4)	MLT1G3|LTR|ERVL-MaLR	31229	NR_135033	105369187	Hs.738044	NR_135033	ENSG00000250748	LOC105369187	-	uncharacterized LOC105369187	ncRNA
Yap_catlast-only89i_peak_12768	chr18	46133526	46133992	+	266	NA	intron (NM_001142397, intron 2 of 12)	intron (NM_001142397, intron 2 of 12)	-63212	NR_039897	100616366		NR_039897	ENSG00000266276	MIR4743	-	microRNA 4743	ncRNA	MIR4743
Yap_catlast-only89i_peak_14411	chr2	48338495	48339070	+	266	NA	Intergenic	Intergenic	-203013	NM_002158	3344	Hs.468478	NM_002158	ENSG00000170802	FOXN2	HTLF	forkhead box N2	protein-coding	FOXN2
Yap_catlast-only89i_peak_6773	chr12	52585855	52586294	+	266	NA	promoter-TSS (NM_182507)	promoter-TSS (NM_182507)	-290	NM_001081492	144501	Hs.140978	NM_182507	ENSG00000167767	KRT80	KB20	keratin 80	protein-coding
Yap_catlast-only89i_peak_3062	chr10	45064926	45065363	+	266	NA	Intergenic	Intergenic	-184599	NM_001033886	6387	Hs.522891	NM_000609	ENSG00000107562	CXCL12	IRH|PBSF|SCYB12|SDF1|TLSF|TPAR1	C-X-C motif chemokine ligand 12	protein-coding
Yap_catlast-only89i_peak_7442	chr12	109226619	109227455	+	266	NA	intron (NM_001161330, intron 2 of 13)	intron (NM_001161330, intron 2 of 13)	3745	NR_030350	693204		NR_030350	ENSG00000207622	MIR619	MIRN619|hsa-mir-619	microRNA 619	ncRNA	MIR619
Yap_catlast-only89i_peak_19726	chr4	66808801	66809133	+	266	NA	Intergenic	MLT1C|LTR|ERVL-MaLR	-272754	NM_001281765	2044	Hs.654492	NM_004439	ENSG00000145242	EPHA5	CEK7|EHK-1|EHK1|EK7|HEK7|TYRO4	EPH receptor A5	protein-coding
Yap_catlast-only89i_peak_20955	chr5	55574333	55574679	+	266	NA	Intergenic	Intergenic	-45320	NM_024669	79722	Hs.436214	NM_024669	ENSG00000164512	ANKRD55	-	ankyrin repeat domain 55	protein-coding	ANKRD55
Yap_catlast-only89i_peak_19001	chr3	174047132	174047483	+	266	NA	Intergenic	Intergenic	-408721	NR_046664	100874010	Hs.624265	NR_046664	ENSG00000228213	NLGN1-AS1	-	NLGN1 antisense RNA 1	ncRNA	NLGN1-AS1
Yap_catlast-only89i_peak_16351	chr20	46012878	46013264	+	266	NA	Intergenic	Intergenic	-27438	NM_183048	23613	Hs.446240	NM_012408	ENSG00000101040	ZMYND8	PRKCBP1|PRO2893|RACK7	zinc finger MYND-type containing 8	protein-coding
Yap_catlast-only89i_peak_14824	chr2	121371295	121371672	+	266	NA	Intergenic	Intergenic	-147558	NR_027181	84931	Hs.334519	NM_032845	ENSG00000280409	LINC01101	-	long intergenic non-protein coding RNA 1101	ncRNA
Yap_catlast-only89i_peak_12515	chr18	9643434	9643876	+	265	NA	Intergenic	Intergenic	28393	NR_110774	101927323	Hs.151204	NR_110773	ENSG00000263627	PPP4R1-AS1	-	PPP4R1 antisense RNA 1	ncRNA
Yap_catlast-only89i_peak_27087	chr8	141844906	141845307	+	264	NA	intron (NM_001316342, intron 5 of 32)	intron (NM_001316342, intron 5 of 32)	166306	NM_005607	5747	Hs.395482	NM_005607	ENSG00000169398	PTK2	FADK|FAK|FAK1|FRNK|PPP1R71|p125FAK|pp125FAK	protein tyrosine kinase 2	protein-coding	PTK2
Yap_catlast-only89i_peak_923	chr1	52363230	52363745	+	264	NA	Intergenic	Intergenic	-18878	NM_001101662	4898	Hs.584782	NM_002525	ENSG00000078618	NRDC	NRD1|hNRD1|hNRD2	nardilysin convertase	protein-coding
Yap_catlast-only89i_peak_25854	chr8	23310002	23310522	+	264	NA	intron (NM_004901, intron 1 of 12)	intron (NM_004901, intron 1 of 12)	4982	NM_004901	9583	Hs.444389	NM_004901	ENSG00000197217	ENTPD4	LALP70|LAP70|LYSAL1|NTPDase-4|UDPase	ectonucleoside triphosphate diphosphohydrolase 4	protein-coding	ENTPD4
Yap_catlast-only89i_peak_19509	chr4	25818567	25818978	+	264	NA	intron (NM_001297594, intron 9 of 23)	intron (NM_001297594, intron 9 of 23)	45881	NM_015187	23231	Hs.479384	NM_015187	ENSG00000091490	SEL1L3	Sel-1L3	SEL1L family member 3	protein-coding	SEL1L3
Yap_catlast-only89i_peak_10195	chr16	9170109	9170542	+	264	NA	Intergenic	AluJr|SINE|Alu	-15212	NM_014117	29035	Hs.221497	NM_014117	ENSG00000182831	C16orf72	PRO0149	chromosome 16 open reading frame 72	protein-coding	C16orf72
Yap_catlast-only89i_peak_17196	chr22	36725369	36725862	+	264	NA	intron (NM_002473, intron 3 of 40)	intron (NM_002473, intron 3 of 40)	-42662	NR_106877	102465491		NR_106877	ENSG00000278420	MIR6819	hsa-mir-6819	microRNA 6819	ncRNA	MIR6819
Yap_catlast-only89i_peak_1976	chr1	184026088	184026731	+	264	NA	intron (NM_001127394, intron 3 of 3)	intron (NM_001127394, intron 3 of 3)	5624	NR_125335	116461	Hs.548197	NM_052965	ENSG00000198860	TSEN15	C1orf19|PCH2F|sen15	tRNA splicing endonuclease subunit 15	protein-coding
Yap_catlast-only89i_peak_6020	chr11	123045421	123045789	+	264	NA	intron (NM_024769, intron 1 of 6)	intron (NM_024769, intron 1 of 6)	20408	NM_024769	79827	Hs.591949	NM_024769	ENSG00000166250	CLMP	ACAM|ASAM|CSBM|CSBS	CXADR like membrane protein	protein-coding	CLMP
Yap_catlast-only89i_peak_8751	chr14	60561023	60561378	+	264	NA	intron (NM_022495, intron 1 of 9)	LTR46|LTR|ERV1	2571	NM_022495	64430	Hs.509499	NM_022495	ENSG00000126773	PCNX4	C14orf135|FBP2|PCNXL4	pecanex homolog 4 (Drosophila)	protein-coding
Yap_catlast-only89i_peak_6986	chr12	64311789	64312162	+	264	NA	intron (NM_020762, intron 1 of 21)	intron (NM_020762, intron 1 of 21)	73442	NM_020762	57522	Hs.210751	NM_020762	ENSG00000196935	SRGAP1	ARHGAP13|NMTC2	SLIT-ROBO Rho GTPase activating protein 1	protein-coding	SRGAP1
Yap_catlast-only89i_peak_12046	chr17	57696990	57697343	+	263	NA	5' UTR (NM_004859, exon 1 of 32)	5' UTR (NM_004859, exon 1 of 32)	116	NM_001288653	1213	Hs.491351	NM_004859	ENSG00000141367	CLTC	CHC|CHC17|CLH-17|CLTCL2|Hc	clathrin heavy chain	protein-coding
Yap_catlast-only89i_peak_2815	chr10	22534488	22534873	+	263	NA	Intergenic	Intergenic	-6321	NR_038921	100130992	Hs.48501	NR_038921		LOC100130992	-	uncharacterized LOC100130992	ncRNA	LOC100130992
Yap_catlast-only89i_peak_25794	chr8	22418491	22418828	+	263	NA	intron (NM_005775, intron 5 of 20)	intron (NM_005775, intron 5 of 20)	-4520	NM_001018003	10174	Hs.528572	NM_005775	ENSG00000120896	SORBS3	SCAM-1|SCAM1|SH3D4	sorbin and SH3 domain containing 3	protein-coding
Yap_catlast-only89i_peak_5648	chr11	93641898	93642387	+	263	NA	Intergenic	Intergenic	-58474	NM_001144871	387804	Hs.512252	NM_001144871	ENSG00000214376	VSTM5	C11orf90	V-set and transmembrane domain containing 5	protein-coding	VSTM5
Yap_catlast-only89i_peak_24751	chr7	73693979	73694310	+	262	NA	Intergenic	Intergenic	-9661	NM_032421	7461	Hs.647018	NM_003388	ENSG00000106665	CLIP2	CLIP|CLIP-115|CYLN2|WBSCR3|WBSCR4|WSCR3|WSCR4	CAP-Gly domain containing linker protein 2	protein-coding
Yap_catlast-only89i_peak_19619	chr4	47533245	47533601	+	262	NA	intron (NM_020453, intron 5 of 22)	L2c|LINE|L2	46013	NM_020453	57205	Hs.437241	NM_020453	ENSG00000145246	ATP10D	ATPVD	ATPase phospholipid transporting 10D (putative)	protein-coding	ATP10D
Yap_catlast-only89i_peak_26576	chr8	99567135	99567431	+	262	NA	intron (NM_001256312, intron 10 of 12)	intron (NM_001256312, intron 10 of 12)	128033	NM_020697	3788	Hs.388045	NM_020697	ENSG00000156486	KCNS2	KV9.2	potassium voltage-gated channel modifier subfamily S member 2	protein-coding	KCNS2
Yap_catlast-only89i_peak_26651	chr8	104356887	104357476	+	262	NA	Intergenic	Intergenic	-26562	NM_138455	115908	Hs.405614	NM_138455	ENSG00000164932	CTHRC1	-	collagen triple helix repeat containing 1	protein-coding	CTHRC1
Yap_catlast-only89i_peak_4244	chr10	134330387	134330982	+	262	NA	Intergenic	Intergenic	-20599	NM_005539	3632	Hs.523360	NM_005539	ENSG00000068383	INPP5A	5PTASE	inositol polyphosphate-5-phosphatase A	protein-coding	INPP5A
Yap_catlast-only89i_peak_1533	chr1	114863194	114863621	+	262	NA	Intergenic	MER103C|DNA|hAT-Charlie	-166935	NM_001270805	148281	Hs.370963	NM_205848	ENSG00000134207	SYT6	sytVI	synaptotagmin 6	protein-coding
Yap_catlast-only89i_peak_28470	chrX	13039354	13039870	+	262	NA	Intergenic	AluSz6|SINE|Alu	23305	NM_174901	171484	Hs.667546	NM_174901	ENSG00000187268	FAM9C	TEX39C	family with sequence similarity 9 member C	protein-coding	FAM9C
Yap_catlast-only89i_peak_3403	chr10	75647122	75647804	+	262	NA	Intergenic	Intergenic	-13114	NM_172169	818	Hs.523045	NM_001222	ENSG00000148660	CAMK2G	CAMK|CAMK-II|CAMKG	calcium/calmodulin dependent protein kinase II gamma	protein-coding
Yap_catlast-only89i_peak_17084	chr22	29702778	29703369	+	262	NA	promoter-TSS (NM_001278730)	promoter-TSS (NM_001278730)	88	NM_001278730	10634	Hs.322852	NM_006478	ENSG00000185340	GAS2L1	GAR22	growth arrest specific 2 like 1	protein-coding
Yap_catlast-only89i_peak_7543	chr12	116864082	116864560	+	262	NA	Intergenic	Intergenic	1802	NR_039683	100616309		NR_039683	ENSG00000264037	MIR4472-2	-	microRNA 4472-2	ncRNA	MIR4472-2
Yap_catlast-only89i_peak_13531	chr19	38490098	38490496	+	262	NA	intron (NM_015073, intron 1 of 21)	intron (NM_015073, intron 1 of 21)	92436	NM_015073	23094	Hs.655502	NM_015073	ENSG00000105738	SIPA1L3	CTRCT45|SPAL3|SPAR3	signal induced proliferation associated 1 like 3	protein-coding	SIPA1L3
Yap_catlast-only89i_peak_4172	chr10	126723711	126724073	+	262	NA	intron (NM_001083914, intron 3 of 10)	intron (NM_001083914, intron 3 of 10)	-2453	NR_036178	100423041		NR_036178	ENSG00000264572	MIR4296	-	microRNA 4296	ncRNA	MIR4296
Yap_catlast-only89i_peak_13922	chr19	57813412	57813829	+	262	NA	Intergenic	L1MA5|LINE|L1	-18245	NM_213598	125919	Hs.202544	NM_213598	ENSG00000178229	ZNF543	-	zinc finger protein 543	protein-coding	ZNF543
Yap_catlast-only89i_peak_9908	chr15	80786575	80787121	+	262	NA	intron (NM_014862, intron 5 of 18)	intron (NM_014862, intron 5 of 18)	68437	NR_120363	101929586	Hs.569426	NR_120363	ENSG00000259175	LOC101929586	-	uncharacterized LOC101929586	ncRNA	LOC101929586
Yap_catlast-only89i_peak_28034	chr9	117453294	117453665	+	262	NA	Intergenic	Intergenic	-9110	NR_133056	100505478	Hs.200101	NM_001199233	ENSG00000230601	LOC100505478	-	uncharacterized LOC100505478	protein-coding
Yap_catlast-only89i_peak_4689	chr11	29328184	29328461	+	262	NA	Intergenic	L2a|LINE|L2	675618	NR_132652	106456574	Hs.128812	NR_132652	ENSG00000261340	LINC01616	n341006	long intergenic non-protein coding RNA 1616	ncRNA
Yap_catlast-only89i_peak_17207	chr22	36793504	36793882	+	262	NA	Intergenic	Intergenic	-9581	NM_002473	4627	Hs.474751	NM_002473	ENSG00000100345	MYH9	BDPLT6|DFNA17|EPSTS|FTNS|MHA|NMHC-II-A|NMMHC-IIA|NMMHCA	myosin heavy chain 9	protein-coding	MYH9
Yap_catlast-only89i_peak_23554	chr6	113697480	113697779	+	262	NA	Intergenic	Eulor9C|DNA|DNA	273648	NR_125844	101927686	Hs.402044	NR_125844	ENSG00000230943	LOC101927686	-	uncharacterized LOC101927686	ncRNA	LOC101927686
Yap_catlast-only89i_peak_8667	chr14	54718519	54719092	+	262	NA	Intergenic	Intergenic	-144781	NM_001330173	1033	Hs.84113	NM_005192	ENSG00000100526	CDKN3	CDI1|CIP2|KAP|KAP1	cyclin dependent kinase inhibitor 3	protein-coding
Yap_catlast-only89i_peak_24156	chr7	16385989	16386620	+	261	NA	intron (NM_001101417, intron 2 of 8)	intron (NM_001101417, intron 2 of 8)	74643	NM_001101426	729920	Hs.636502	NM_001101417	ENSG00000214960	ISPD	MDDGA7|MDDGC7|Nip|hCG_1745121	isoprenoid synthase domain containing	protein-coding
Yap_catlast-only89i_peak_22906	chr6	37685737	37686174	+	261	NA	Intergenic	MER99|DNA|hAT?	-20189	NM_153487	266727	Hs.437993	NM_153487	ENSG00000112139	MDGA1	GPIM|MAMDC3	MAM domain containing glycosylphosphatidylinositol anchor 1	protein-coding	MDGA1
Yap_catlast-only89i_peak_6977	chr12	63260518	63260967	+	261	NA	intron (NM_020700, intron 1 of 9)	intron (NM_020700, intron 1 of 9)	67923	NM_020700	57460	Hs.435479	NM_020700	ENSG00000111110	PPM1H	ARHCL1|NERPP-2C|URCC2	protein phosphatase, Mg2+/Mn2+ dependent 1H	protein-coding	PPM1H
Yap_catlast-only89i_peak_16291	chr20	43641625	43641935	+	260	NA	intron (NM_006282, intron 9 of 10)	L1M5|LINE|L1	46665	NM_006282	6789	Hs.472838	NM_006282	ENSG00000101109	STK4	KRS2|MST1|YSK3	serine/threonine kinase 4	protein-coding	STK4
Yap_catlast-only89i_peak_16676	chr21	30535246	30535460	+	260	NA	intron (NM_001286617, intron 9 of 9)	AluSz6|SINE|Alu	17473	NM_001286624	56911	Hs.222802	NM_020152	ENSG00000156265	MAP3K7CL	C21orf7|HC21ORF7|TAK1L|TAKL|TAKL-1|TAKL-2|TAKL-4	MAP3K7 C-terminal like	protein-coding
Yap_catlast-only89i_peak_7885	chr13	31746716	31747111	+	260	NA	Intergenic	Intergenic	-10388	NM_001286504	10808	Hs.743267	NM_006644	ENSG00000120694	HSPH1	HSP105|HSP105A|HSP105B|NY-CO-25	heat shock protein family H (Hsp110) member 1	protein-coding
Yap_catlast-only89i_peak_11687	chr17	35848293	35848662	+	260	NA	Intergenic	Intergenic	-1474	NM_007026	11072	Hs.91448	NM_007026	ENSG00000276023	DUSP14	MKP-L|MKP6	dual specificity phosphatase 14	protein-coding	DUSP14
Yap_catlast-only89i_peak_23246	chr6	75915626	75916158	+	260	NA	promoter-TSS (NM_004370)	promoter-TSS (NM_004370)	-269	NM_004370	1303	Hs.101302	NM_004370	ENSG00000111799	COL12A1	BA209D8.1|BTHLM2|COL12A1L|DJ234P15.1|UCMD2	collagen type XII alpha 1 chain	protein-coding	COL12A1
Yap_catlast-only89i_peak_15463	chr2	219671001	219671281	+	260	NA	intron (NM_000784, intron 1 of 8)	MER20|DNA|hAT-Charlie	-16672	NR_128707	103504730		NR_128707	ENSG00000283639	MIR9500	hsa-mir-9500	microRNA 9500	ncRNA	MIR9500
Yap_catlast-only89i_peak_23000	chr6	43142010	43142237	+	260	NA	intron (NM_001292001, intron 2 of 6)	CpG	1995	NM_001292001	6722	Hs.520140	NM_003131	ENSG00000112658	SRF	MCM1	serum response factor	protein-coding
Yap_catlast-only89i_peak_3748	chr10	97020413	97020604	+	259	NA	intron (NM_020992, intron 4 of 6)	intron (NM_020992, intron 4 of 6)	30397	NM_020992	9124	Hs.368525	NM_020992	ENSG00000107438	PDLIM1	CLIM1|CLP-36|CLP36|HEL-S-112|hCLIM1	PDZ and LIM domain 1	protein-coding	PDLIM1
Yap_catlast-only89i_peak_22262	chr6	3061771	3062213	+	258	NA	Intergenic	Tigger1|DNA|TcMar-Tigger	-2130	NM_003804	8737	Hs.519842	NM_003804	ENSG00000137275	RIPK1	RIP|RIP-1|RIP1	receptor interacting serine/threonine kinase 1	protein-coding	RIPK1
Yap_catlast-only89i_peak_3697	chr10	94995520	94995869	+	258	NA	Intergenic	Intergenic	162047	NM_000783	1592	Hs.150595	NM_000783	ENSG00000095596	CYP26A1	CP26|CYP26|P450RAI|P450RAI1	cytochrome P450 family 26 subfamily A member 1	protein-coding	CYP26A1
Yap_catlast-only89i_peak_4004	chr10	112326895	112327203	+	258	NA	promoter-TSS (NM_005445)	promoter-TSS (NM_005445)	-400	NM_005445	9126	Hs.24485	NM_005445	ENSG00000108055	SMC3	BAM|BMH|CDLS3|CSPG6|HCAP|SMC3L1	structural maintenance of chromosomes 3	protein-coding	SMC3
Yap_catlast-only89i_peak_9457	chr15	41275025	41275437	+	258	NA	non-coding (NR_104038, exon 34 of 35)	non-coding (NR_104038, exon 34 of 35)	29884	NM_024111	79094	Hs.155569	NM_024111	ENSG00000128965	CHAC1	-	ChaC glutathione specific gamma-glutamylcyclotransferase 1	protein-coding	CHAC1
Yap_catlast-only89i_peak_14253	chr2	37938552	37938892	+	258	NA	Intergenic	Intergenic	-39044	NM_001270436	10602	Hs.369574	NM_006449	ENSG00000163171	CDC42EP3	BORG2|CEP3|UB1	CDC42 effector protein 3	protein-coding
Yap_catlast-only89i_peak_21075	chr5	71766607	71767051	+	258	NA	intron (NM_152625, intron 1 of 4)	intron (NM_152625, intron 1 of 4)	36420	NM_152625	167465	Hs.224794	NM_152625	ENSG00000178175	ZNF366	DCSCRIPT	zinc finger protein 366	protein-coding	ZNF366
Yap_catlast-only89i_peak_3228	chr10	64214369	64214778	+	258	NA	intron (NM_199451, intron 3 of 7)	L2c|LINE|L2	-65634	NM_199452	22891	Hs.22653	NM_014951	ENSG00000138311	ZNF365	Su48|UAN|ZNF365D	zinc finger protein 365	protein-coding
Yap_catlast-only89i_peak_9371	chr15	33116965	33117382	+	258	NA	intron (NM_001103184, intron 13 of 16)	L2b|LINE|L2	-106107	NR_109767	100131315	Hs.610545	NR_109767	ENSG00000259721	LOC100131315	-	uncharacterized LOC100131315	ncRNA	LOC100131315
Yap_catlast-only89i_peak_2568	chr10	1032945	1033592	+	258	NA	Intergenic	L3|LINE|CR1	-1081	NM_012341	23560	Hs.215766	NM_012341	ENSG00000107937	GTPBP4	CRFG|NGB|NOG1	GTP binding protein 4	protein-coding	GTPBP4
Yap_catlast-only89i_peak_21294	chr5	96156838	96157321	+	258	NA	Intergenic	Intergenic	-7231	NM_001198541	51752	Hs.666524	NM_016442	ENSG00000164307	ERAP1	A-LAP|ALAP|APPILS|ARTS-1|ARTS1|ERAAP|ERAAP1|PILS-AP|PILSAP	endoplasmic reticulum aminopeptidase 1	protein-coding
Yap_catlast-only89i_peak_16954	chr22	20923280	20923780	+	257	NA	intron (NM_001293234, intron 8 of 16)	intron (NM_001293234, intron 8 of 16)	61195	NM_001293237	51586	Hs.517421	NM_015889	ENSG00000099917	MED15	ARC105|CAG7A|CTG7A|PCQAP|TIG-1|TIG1|TNRC7	mediator complex subunit 15	protein-coding
Yap_catlast-only89i_peak_14227	chr2	36713532	36714181	+	257	NA	intron (NM_016441, intron 7 of 16)	L3|LINE|CR1	111476	NM_001042548	9637	Hs.258563	NM_005102	ENSG00000171055	FEZ2	HUM3CL	fasciculation and elongation protein zeta 2	protein-coding
Yap_catlast-only89i_peak_11231	chr17	4133379	4133767	+	257	NA	intron (NR_047571, intron 2 of 23)	intron (NR_047571, intron 2 of 23)	33569	NM_001257999	51479	Hs.696087	NM_016376	ENSG00000185722	ANKFY1	ANKHZN|BTBD23|ZFYVE14	ankyrin repeat and FYVE domain containing 1	protein-coding
Yap_catlast-only89i_peak_9832	chr15	74233220	74233885	+	257	NA	intron (NM_005576, intron 1 of 6)	intron (NM_005576, intron 1 of 6)	-12963	NR_040069	100287616	Hs.599785	NR_040066	ENSG00000261801	LOXL1-AS1	-	LOXL1 antisense RNA 1	ncRNA
Yap_catlast-only89i_peak_27007	chr8	131915625	131916027	+	256	NA	intron (NM_001115, intron 7 of 17)	intron (NM_001115, intron 7 of 17)	137009	NM_001115	114	Hs.591859	NM_001115	ENSG00000155897	ADCY8	AC8|ADCY3|HBAC1	adenylate cyclase 8	protein-coding	ADCY8
Yap_catlast-only89i_peak_25877	chr8	25052823	25053312	+	256	NA	intron (NM_001322810, intron 1 of 3)	L2b|LINE|L2	10829	NM_001322810	80005	Hs.195403	NM_024940	ENSG00000147459	DOCK5	-	dedicator of cytokinesis 5	protein-coding
Yap_catlast-only89i_peak_14308	chr2	43151909	43152443	+	256	NA	Intergenic	Intergenic	114506	NR_110585	102723854	Hs.570165	NR_110585	ENSG00000231826	LINC01819	-	long intergenic non-protein coding RNA 1819	ncRNA
Yap_catlast-only89i_peak_4607	chr11	19109334	19109561	+	256	NA	Intergenic	Intergenic	-27219	NM_054030	117194	Hs.350566	NM_054030	ENSG00000183695	MRGPRX2	MGRG3|MRGX2	MAS related GPR family member X2	protein-coding	MRGPRX2
Yap_catlast-only89i_peak_4297	chr11	1394784	1395146	+	256	NA	Intergenic	Intergenic	-16164	NM_003957	9024	Hs.170819	NM_003957	ENSG00000174672	BRSK2	C11orf7|PEN11B|SAD1|SADA|STK29	BR serine/threonine kinase 2	protein-coding	BRSK2
Yap_catlast-only89i_peak_16353	chr20	46081867	46082368	+	256	NA	Intergenic	Arthur1C|DNA|hAT-Tip100	-48484	NM_001174087	8202	Hs.592142	NM_006534	ENSG00000124151	NCOA3	ACTR|AIB-1|AIB1|CAGH16|CTG26|KAT13B|RAC3|SRC-3|SRC3|TNRC14|TNRC16|TRAM-1|bHLHe42|pCIP	nuclear receptor coactivator 3	protein-coding
Yap_catlast-only89i_peak_21800	chr5	148553616	148554053	+	256	NA	intron (NM_014945, intron 2 of 23)	intron (NM_014945, intron 2 of 23)	32824	NM_001345860	22885	Hs.49688	NM_014945	ENSG00000173210	ABLIM3	HMFN1661	actin binding LIM protein family member 3	protein-coding
Yap_catlast-only89i_peak_17967	chr3	52188458	52189126	+	256	NA	promoter-TSS (NM_001161580)	promoter-TSS (NM_001161580)	-86	NM_001161580	25886	Hs.476306	NM_015426	ENSG00000164087	POC1A	PIX2|SOFT|WDR51A	POC1 centriolar protein A	protein-coding
Yap_catlast-only89i_peak_9135	chr14	90280162	90280508	+	256	NA	intron (NM_145231, intron 5 of 5)	intron (NM_145231, intron 5 of 5)	140566	NM_001284269	90141	Hs.123232	NM_145231	ENSG00000140025	EFCAB11	C14orf143	EF-hand calcium binding domain 11	protein-coding
Yap_catlast-only89i_peak_11626	chr17	30081240	30081590	+	256	NA	Intergenic	Intergenic	104678	NM_001330176	55352	Hs.462729	NM_018405	ENSG00000172301	COPRS	C17orf79|COPR5|HSA272196|TTP1	coordinator of PRMT5 and differentiation stimulator	protein-coding
Yap_catlast-only89i_peak_23105	chr6	53033230	53033671	+	256	NA	Intergenic	Intergenic	-19826	NM_003643	8521	Hs.23589	NM_003643	ENSG00000137270	GCM1	GCMA|hGCMa	glial cells missing homolog 1	protein-coding	GCM1
Yap_catlast-only89i_peak_7567	chr12	118490254	118490655	+	256	NA	intron (NM_001278557, intron 1 of 8)	intron (NM_001278557, intron 1 of 8)	8562	NM_018639	55884	Hs.506985	NM_018639	ENSG00000176871	WSB2	SBA2	WD repeat and SOCS box containing 2	protein-coding	WSB2
Yap_catlast-only89i_peak_11054	chr16	88454637	88455080	+	256	NA	Intergenic	Intergenic	-39021	NM_001127464	84627	Hs.54925	NM_001127464	ENSG00000225614	ZNF469	BCS|BCS1	zinc finger protein 469	protein-coding	ZNF469
Yap_catlast-only89i_peak_8098	chr13	52922290	52922693	+	256	NA	Intergenic	Intergenic	14061	NR_120400	103191607		NR_120400	ENSG00000271564	LOC103191607	-	uncharacterized LOC103191607	ncRNA	LOC103191607
Yap_catlast-only89i_peak_15999	chr20	30081875	30082289	+	256	NA	Intergenic	MLT1J|LTR|ERVL-MaLR	8501	NR_024358	140875	Hs.283478	NR_024358	ENSG00000233354	LINC00028	C20orf93|NCRNA00028|dJ1093G12.6	long intergenic non-protein coding RNA 28	ncRNA	LINC00028
Yap_catlast-only89i_peak_2089	chr1	201872253	201872647	+	256	NA	intron (NM_012134, intron 1 of 2)	intron (NM_012134, intron 1 of 2)	14645	NM_198149	149345	Hs.632471	NM_198149	ENSG00000198892	SHISA4	C1orf40|TMEM58	shisa family member 4	protein-coding	SHISA4
Yap_catlast-only89i_peak_26522	chr8	97351369	97351641	+	256	NA	Intergenic	Intergenic	47371	NR_125829	102724804	Hs.571415	NR_125828	ENSG00000253105	LOC102724804	-	uncharacterized LOC102724804	ncRNA
Yap_catlast-only89i_peak_17761	chr3	33401877	33402454	+	256	NA	intron (NM_001171713, intron 4 of 13)	intron (NM_001171713, intron 4 of 13)	79705	NM_014517	7342	Hs.729120	NM_014517	ENSG00000153560	UBP1	LBP-1B|LBP-1a|LBP1A|LBP1B	upstream binding protein 1 (LBP-1a)	protein-coding	UBP1
Yap_catlast-only89i_peak_26115	chr8	41009050	41009548	+	256	NA	Intergenic	Intergenic	119363	NR_049801	100847068		NR_049801	ENSG00000263372	MIR548AO	-	microRNA 548ao	ncRNA	MIR548AO
Yap_catlast-only89i_peak_8126	chr13	65297944	65298273	+	256	NA	Intergenic	Intergenic	-879850	NR_130763	102723968	Hs.551671	NR_130763	ENSG00000219926	LOC102723968	-	uncharacterized LOC102723968	ncRNA	LOC102723968
Yap_catlast-only89i_peak_24732	chr7	73406409	73406812	+	256	NA	Intergenic	Mam_R4|LINE|Dong-R4	-35509	NM_001278914	2006	Hs.647061	NM_000501	ENSG00000049540	ELN	SVAS|WBS|WS	elastin	protein-coding
Yap_catlast-only89i_peak_14324	chr2	43804434	43804679	+	256	NA	intron (NR_144316, intron 9 of 36)	intron (NR_144316, intron 9 of 36)	18557	NM_001083953	63892	Hs.369592	NM_022065	ENSG00000115970	THADA	ARMC13|GITA	THADA, armadillo repeat containing	protein-coding
Yap_catlast-only89i_peak_2215	chr1	210771521	210772046	+	256	NA	intron (NM_001122834, intron 10 of 11)	L1MA3|LINE|L1	269143	NM_001170580	55733	Hs.58650	NM_018194	ENSG00000054392	HHAT	MART2|SKI1|Skn	hedgehog acyltransferase	protein-coding
Yap_catlast-only89i_peak_1973	chr1	183850822	183851262	+	256	NA	intron (NM_001297670, intron 5 of 17)	intron (NM_001297670, intron 5 of 17)	76827	NM_001297672	23179	Hs.497148	NM_015149	ENSG00000143344	RGL1	RGL	ral guanine nucleotide dissociation stimulator like 1	protein-coding
Yap_catlast-only89i_peak_28914	chrX	133671312	133671678	+	256	NA	Intergenic	Intergenic	2797	NR_030587	100126302		NR_030587	ENSG00000216001	MIR450B	MIRN450B|mir-450b	microRNA 450b	ncRNA	MIR450B
Yap_catlast-only89i_peak_16524	chr20	55014743	55015225	+	256	NA	intron (NM_020356, intron 2 of 5)	intron (NM_020356, intron 2 of 5)	27670	NM_001164114	57091	Hs.473144	NM_020356	ENSG00000087589	CASS4	C20orf32|CAS4|HEFL|HEPL	Cas scaffolding protein family member 4	protein-coding
Yap_catlast-only89i_peak_10136	chr16	3072148	3072792	+	256	NA	TTS (NM_001002017)	TTS (NM_001002017)	-1550	NM_024339	79228	Hs.412304	NM_024339	ENSG00000131652	THOC6	WDR58|fSAP35	THO complex 6	protein-coding	THOC6
Yap_catlast-only89i_peak_15608	chr2	235357817	235358118	+	256	NA	Intergenic	MER103C|DNA|hAT-Charlie	47726	NM_005737	10123	Hs.111554	NM_005737	ENSG00000188042	ARL4C	ARL7|LAK	ADP ribosylation factor like GTPase 4C	protein-coding	ARL4C
Yap_catlast-only89i_peak_13286	chr19	13164752	13164994	+	256	NA	intron (NM_001271043, intron 2 of 10)	intron (NM_001271043, intron 2 of 10)	29478	NM_001271043	4784	Hs.257970	NM_002501	ENSG00000008441	NFIX	CTF|MRSHSS|NF-I/X|NF1-X|NF1A|SOTOS2	nuclear factor I X	protein-coding
Yap_catlast-only89i_peak_25760	chr8	20163998	20164564	+	256	NA	Intergenic	Intergenic	30997	NR_047509	100874051	Hs.385799	NR_047509	ENSG00000253733	LZTS1-AS1	-	LZTS1 antisense RNA 1	ncRNA	LZTS1-AS1
Yap_catlast-only89i_peak_20309	chr4	174139806	174140205	+	256	NA	intron (NM_017423, intron 1 of 11)	L2c|LINE|L2	-49202	NR_134241	101930370	Hs.563191	NR_134241	ENSG00000245213	LOC101930370	-	uncharacterized LOC101930370	ncRNA
Yap_catlast-only89i_peak_13326	chr19	14192067	14192601	+	256	NA	TTS (NM_001277378)	TTS (NM_001277378)	4273	NM_001277378	646457	Hs.569971	NM_001277378	ENSG00000188032	C19orf67	-	chromosome 19 open reading frame 67	protein-coding	C19orf67
Yap_catlast-only89i_peak_3218	chr10	63984303	63984840	+	255	NA	intron (NM_145307, intron 6 of 11)	L2a|LINE|L2	44051	NM_145307	219790	Hs.58559	NM_145307	ENSG00000182010	RTKN2	PLEKHK1|bA531F24.1	rhotekin 2	protein-coding	RTKN2
Yap_catlast-only89i_peak_3455	chr10	78136300	78136850	+	255	NA	intron (NR_131178, intron 7 of 7)	L1P4|LINE|L1	-511227	NR_120655	101929328	Hs.664552	NR_120655	ENSG00000236467	KCNMA1-AS1	-	KCNMA1 antisense RNA 1	ncRNA	KCNMA1-AS1
Yap_catlast-only89i_peak_2959	chr10	33271304	33271714	+	255	NA	Intergenic	AluSz6|SINE|Alu	-24216	NM_002211	3688	Hs.643813	NM_002211	ENSG00000150093	ITGB1	CD29|FNRB|GPIIA|MDF2|MSK12|VLA-BETA|VLAB	integrin subunit beta 1	protein-coding	ITGB1
Yap_catlast-only89i_peak_26589	chr8	101270797	101271070	+	255	NA	exon (NM_183419, exon 10 of 10)	exon (NM_183419, exon 10 of 10)	44554	NM_015435	25897	Hs.292882	NM_015435	ENSG00000034677	RNF19A	RNF19	ring finger protein 19A, RBR E3 ubiquitin protein ligase	protein-coding	RNF19A
Yap_catlast-only89i_peak_24573	chr7	47835224	47835576	+	255	NA	intron (NM_025031, intron 1 of 2)	MIRc|SINE|MIR	511	NM_001302627	80099	Hs.287647	NM_025031		C7orf69	-	chromosome 7 open reading frame 69	protein-coding
Yap_catlast-only89i_peak_6029	chr11	123300030	123300493	+	255	NA	Intergenic	Intergenic	-48041	NR_039714	100616319		NR_039714	ENSG00000265357	MIR4493	-	microRNA 4493	ncRNA	MIR4493
Yap_catlast-only89i_peak_26948	chr8	129195380	129195776	+	255	NA	Intergenic	Intergenic	33216	NR_031613	100302281		NR_031613	ENSG00000221261	MIR1208	MIRN1208|hsa-mir-1208	microRNA 1208	ncRNA	MIR1208
Yap_catlast-only89i_peak_23909	chr6	159284731	159285173	+	255	NA	Intergenic	Intergenic	-5947	NM_001302841	100130967	Hs.32804	NM_001195032		C6orf99	yR211F11.1	chromosome 6 open reading frame 99	protein-coding
Yap_catlast-only89i_peak_21869	chr5	151064466	151064828	+	255	NA	intron (NR_109873, intron 3 of 4)	intron (NR_109873, intron 3 of 4)	1968	NM_003118	6678	Hs.111779	NM_003118	ENSG00000113140	SPARC	BM-40|OI17|ON	secreted protein acidic and cysteine rich	protein-coding	SPARC
Yap_catlast-only89i_peak_21789	chr5	148292577	148292957	+	255	NA	Intergenic	Intergenic	86611	NM_000024	154	Hs.2551	NM_000024	ENSG00000169252	ADRB2	ADRB2R|ADRBR|B2AR|BAR|BETA2AR	adrenoceptor beta 2	protein-coding	ADRB2
Yap_catlast-only89i_peak_25554	chr7	151384692	151385089	+	255	NA	intron (NM_016203, intron 3 of 15)	intron (NM_016203, intron 3 of 15)	48510	NM_001304527	51422	Hs.647072	NM_016203	ENSG00000106617	PRKAG2	AAKG|AAKG2|CMH6|H91620p|WPWS	protein kinase AMP-activated non-catalytic subunit gamma 2	protein-coding
Yap_catlast-only89i_peak_9693	chr15	64752460	64752844	+	254	NA	Intergenic	CpG	-38967	NM_015042	23060	Hs.595451	NM_015042	ENSG00000180357	ZNF609	-	zinc finger protein 609	protein-coding	ZNF609
Yap_catlast-only89i_peak_28596	chrX	40363918	40364518	+	254	NA	Intergenic	Intergenic	-75998	NM_005765	10159	Hs.495960	NM_005765	ENSG00000182220	ATP6AP2	APT6M8-9|ATP6IP2|ATP6M8-9|ELDF10|HT028|M8-9|MRXE|MRXSH|MSTP009|PRR|RENR|XMRE|XPDS	ATPase H+ transporting accessory protein 2	protein-coding	ATP6AP2
Yap_catlast-only89i_peak_13382	chr19	17422749	17423132	+	254	NA	intron (NM_024050, intron 1 of 4)	MIRb|SINE|MIR	2603	NM_024050	79016	Hs.466154	NM_024050	ENSG00000130311	DDA1	C19orf58|PCIA1	DET1 and DDB1 associated 1	protein-coding	DDA1
Yap_catlast-only89i_peak_25230	chr7	116644985	116645499	+	254	NA	intron (NM_018412, intron 1 of 14)	intron (NM_018412, intron 1 of 14)	-15023	NR_106748	102466616		NR_106748	ENSG00000004866	MIR6132	hsa-mir-6132	microRNA 6132	ncRNA	MIR6132
Yap_catlast-only89i_peak_9597	chr15	58839460	58839815	+	254	NA	intron (NM_000236, intron 5 of 8)	intron (NM_000236, intron 5 of 8)	-48703	NR_120338	101928694	Hs.655781	NR_120338	ENSG00000259293	LIPC-AS1	-	LIPC antisense RNA 1	ncRNA
Yap_catlast-only89i_peak_728	chr1	38424355	38424782	+	254	NA	intron (NM_001320830, intron 14 of 14)	intron (NM_001320830, intron 14 of 14)	-11839	NM_005540	3633	Hs.449942	NM_005540	ENSG00000204084	INPP5B	5PTase	inositol polyphosphate-5-phosphatase B	protein-coding	INPP5B
Yap_catlast-only89i_peak_25558	chr7	151703330	151703822	+	254	NA	intron (NR_033169, intron 7 of 9)	intron (NR_033169, intron 7 of 9)	-19183	NM_001304514	63917	Hs.647109	NM_022087	ENSG00000178234	GALNT11	GALNAC-T11|GALNACT11	polypeptide N-acetylgalactosaminyltransferase 11	protein-coding
Yap_catlast-only89i_peak_17070	chr22	28538315	28538787	+	254	NA	intron (NM_001145418, intron 6 of 22)	intron (NM_001145418, intron 6 of 22)	-221951	NR_036169	100423034		NR_036169	ENSG00000264073	MIR3199-1	mir-3199-1	microRNA 3199-1	ncRNA	MIR3199-1
Yap_catlast-only89i_peak_25860	chr8	23577807	23578193	+	254	NA	Intergenic	Intergenic	-13889	NM_001136271	137814	Hs.532654	NM_001136271	ENSG00000180053	NKX2-6	CSX2|CTHM|NKX2F|NKX4-2	NK2 homeobox 6	protein-coding	NKX2-6
Yap_catlast-only89i_peak_25110	chr7	105470714	105471354	+	254	NA	intron (NM_020725, intron 2 of 11)	intron (NM_020725, intron 2 of 11)	45997	NM_020725	222255	Hs.745056	NM_020725	ENSG00000146776	ATXN7L1	ATXN7L4	ataxin 7 like 1	protein-coding	ATXN7L1
Yap_catlast-only89i_peak_9084	chr14	79314609	79314943	+	254	NA	intron (NM_001330195, intron 10 of 20)	intron (NM_001330195, intron 10 of 20)	-351549	NR_135159	105370586		NR_135159	ENSG00000258419	LOC105370586	-	uncharacterized LOC105370586	ncRNA
Yap_catlast-only89i_peak_16137	chr20	34472247	34472518	+	254	NA	intron (NM_016436, intron 9 of 17)	intron (NM_016436, intron 9 of 17)	70166	NM_033630	51282	Hs.584909	NM_016558	ENSG00000171222	SCAND1	RAZ1|SDP1	SCAN domain containing 1	protein-coding
Yap_catlast-only89i_peak_15502	chr2	224806717	224807101	+	254	NA	intron (NM_020830, intron 1 of 11)	intron (NM_020830, intron 1 of 11)	3195	NM_020830	57590	Hs.368359	NM_020830	ENSG00000085449	WDFY1	FENS-1|WDF1|ZFYVE17	WD repeat and FYVE domain containing 1	protein-coding	WDFY1
Yap_catlast-only89i_peak_24813	chr7	77165939	77166163	+	254	NA	promoter-TSS (NM_002835)	promoter-TSS (NM_002835)	-722	NM_002835	5782	Hs.61812	NM_002835	ENSG00000127947	PTPN12	PTP-PEST|PTPG1	protein tyrosine phosphatase, non-receptor type 12	protein-coding	PTPN12
Yap_catlast-only89i_peak_25474	chr7	141062319	141062795	+	254	NA	intron (NM_001195278, intron 2 of 3)	intron (NM_001195278, intron 2 of 3)	-188521	NM_018238	55750	Hs.743318	NM_018238	ENSG00000006530	AGK	CATC5|CTRCT38|MTDPS10|MULK	acylglycerol kinase	protein-coding	AGK
Yap_catlast-only89i_peak_8910	chr14	69545661	69546405	+	254	NA	intron (NM_001284206, intron 6 of 8)	intron (NM_001284206, intron 6 of 8)	73283	NM_001284207	8816	Hs.509780	NM_003861	ENSG00000139990	DCAF5	BCRG2|BCRP2|D14S1461E|WDR22	DDB1 and CUL4 associated factor 5	protein-coding
Yap_catlast-only89i_peak_28325	chr9	134055040	134055306	+	253	NA	intron (NM_005085, intron 24 of 35)	intron (NM_005085, intron 24 of 35)	-10329	NM_001318325	8021	Hs.654530	NM_005085	ENSG00000126883	NUP214	CAIN|CAN	nucleoporin 214	protein-coding
Yap_catlast-only89i_peak_27362	chr9	21465894	21466274	+	253	NA	intron (NR_027054, intron 3 of 3)	intron (NR_027054, intron 3 of 3)	16228	NM_176891	338376	Hs.682604	NM_176891	ENSG00000184995	IFNE	IFN-E|IFNE1|IFNT1|INFE1|PRO655	interferon epsilon	protein-coding	IFNE
Yap_catlast-only89i_peak_20198	chr4	152405932	152406289	+	253	NA	intron (NM_001109977, intron 3 of 13)	intron (NM_001109977, intron 3 of 13)	75712	NM_001109977	729830	Hs.633810	NM_001109977	ENSG00000164142	FAM160A1	-	family with sequence similarity 160 member A1	protein-coding	FAM160A1
Yap_catlast-only89i_peak_2426	chr1	234746538	234746907	+	253	NA	Intergenic	CpG	-1451	NM_001077397	359948	Hs.350268	NM_182972	ENSG00000168264	IRF2BP2	-	interferon regulatory factor 2 binding protein 2	protein-coding
Yap_catlast-only89i_peak_17359	chr22	43176030	43176341	+	253	NA	Intergenic	Intergenic	-58878	NM_001318038	53947	Hs.105956	NM_017436	ENSG00000128274	A4GALT	A14GALT|A4GALT1|Gb3S|P(k)|P1|P1PK|PK	alpha 1,4-galactosyltransferase	protein-coding
Yap_catlast-only89i_peak_27849	chr9	102583761	102584415	+	253	NA	promoter-TSS (NM_173200)	promoter-TSS (NM_173200)	-49	NM_173199	8013	Hs.279522	NM_006981	ENSG00000119508	NR4A3	CHN|CSMF|MINOR|NOR1|TEC	nuclear receptor subfamily 4 group A member 3	protein-coding
Yap_catlast-only89i_peak_28279	chr9	132096314	132096920	+	253	NA	Intergenic	Intergenic	-2585	NR_120685	100506119	Hs.624047	NR_120685	ENSG00000233901	LINC01503	-	long intergenic non-protein coding RNA 1503	ncRNA	LINC01503
Yap_catlast-only89i_peak_26537	chr8	98160442	98160881	+	253	NA	intron (NR_125390, intron 2 of 2)	MER76|LTR|ERVL	129515	NM_033512	85453	Hs.173094	NM_033512	ENSG00000180543	TSPYL5	-	TSPY like 5	protein-coding	TSPYL5
Yap_catlast-only89i_peak_16943	chr22	20129107	20129717	+	253	NA	intron (NM_001185024, intron 9 of 10)	intron (NM_001185024, intron 9 of 10)	8019	NM_001243537	388849	Hs.454905	NM_001243537	ENSG00000234409	CCDC188	-	coiled-coil domain containing 188	protein-coding
Yap_catlast-only89i_peak_12222	chr17	70712287	70712672	+	253	NA	intron (NM_001159770, intron 7 of 9)	intron (NM_001159770, intron 7 of 9)	-75868	NR_033876	400619	Hs.447555	NR_033876	ENSG00000227036	LINC00511	LCAL5|onco-lncRNA-12	long intergenic non-protein coding RNA 511	ncRNA	LINC00511
Yap_catlast-only89i_peak_7824	chr13	28174054	28174426	+	253	NA	intron (NM_153371, intron 1 of 9)	L2a|LINE|L2	20480	NM_153371	222484	Hs.132359	NM_153371	ENSG00000139517	LNX2	PDZRN1	ligand of numb-protein X 2	protein-coding	LNX2
Yap_catlast-only89i_peak_22231	chr6	1481556	1481958	+	253	NA	Intergenic	Intergenic	-91111	NR_106778	102466720		NR_106778	ENSG00000275859	MIR6720	hsa-mir-6720|mir-6720	microRNA 6720	ncRNA	MIR6720
Yap_catlast-only89i_peak_4202	chr10	128039095	128039462	+	253	NA	intron (NM_003474, intron 1 of 22)	intron (NM_003474, intron 1 of 22)	37849	NM_001288975	8038	Hs.594351	NM_003474	ENSG00000148848	ADAM12	ADAM12-OT1|CAR10|MCMP|MCMPMltna|MLTN|MLTNA	ADAM metallopeptidase domain 12	protein-coding
Yap_catlast-only89i_peak_7287	chr12	96017417	96017782	+	252	NA	Intergenic	Intergenic	-25432	NR_077225	100132594	Hs.676211	NR_077225	ENSG00000257150	PGAM1P5	-	phosphoglycerate mutase 1 pseudogene 5	pseudo	PGAM1P5
Yap_catlast-only89i_peak_20778	chr5	37771631	37772287	+	252	NA	Intergenic	Intergenic	62965	NM_001278098	2668	Hs.248114	NM_000514	ENSG00000168621	GDNF	ATF|ATF1|ATF2|HFB1-GDNF|HSCR3	glial cell derived neurotrophic factor	protein-coding
Yap_catlast-only89i_peak_1979	chr1	184239635	184239959	+	252	NA	Intergenic	LTR16B1|LTR|ERVL	-116353	NM_030806	81563	Hs.497159	NM_030806	ENSG00000116667	C1orf21	PIG13	chromosome 1 open reading frame 21	protein-coding	C1orf21
Yap_catlast-only89i_peak_23298	chr6	83552544	83552897	+	252	NA	Intergenic	AluSz|SINE|Alu	222840	NM_001304437	90025	Hs.148609	NM_198920	ENSG00000118420	UBE3D	C6orf157|H10BH|UBE2CBP|YJR141W	ubiquitin protein ligase E3D	protein-coding
Yap_catlast-only89i_peak_26696	chr8	110749860	110750332	+	252	NA	Intergenic	L2a|LINE|L2	-46076	NM_001099744	55638	Hs.390738	NM_017786	ENSG00000147642	SYBU	GOLSYN|OCSYN|SNPHL	syntabulin	protein-coding
Yap_catlast-only89i_peak_14514	chr2	69365549	69366000	+	252	NA	intron (NM_053034, intron 12 of 14)	intron (NM_053034, intron 12 of 14)	34960	NR_036073	100423030		NR_036073	ENSG00000266649	MIR3126	mir-3126	microRNA 3126	ncRNA	MIR3126
Yap_catlast-only89i_peak_19381	chr4	7863175	7863536	+	252	NA	intron (NM_001134647, intron 3 of 17)	intron (NM_001134647, intron 3 of 17)	-77373	NM_203423	389199	Hs.375210	NM_203423		LOC389199	-	uncharacterized LOC389199	protein-coding	LOC389199
Yap_catlast-only89i_peak_6554	chr12	28176555	28176848	+	252	NA	Intergenic	MLT1F2|LTR|ERVL-MaLR	-51785	NM_198965	5744	Hs.591159	NM_002820	ENSG00000087494	PTHLH	BDE2|HHM|PLP|PTHR|PTHRP	parathyroid hormone like hormone	protein-coding
Yap_catlast-only89i_peak_9815	chr15	71984104	71984464	+	252	NA	promoter-TSS (NR_120346)	promoter-TSS (NR_120346)	-406	NR_120346	101929173	Hs.680593	NR_120346		THSD4-AS2	-	THSD4 antisense RNA 2	ncRNA	THSD4-AS2
Yap_catlast-only89i_peak_6471	chr12	22094824	22095398	+	251	NA	Intergenic	CpG	-5483	NM_020297	10060	Hs.732701	NM_005691	ENSG00000069431	ABCC9	ABC37|ATFB12|CANTU|CMD1O|SUR2	ATP binding cassette subfamily C member 9	protein-coding
Yap_catlast-only89i_peak_3560	chr10	86299738	86300284	+	251	NA	Intergenic	Intergenic	115073	NM_001284242	54462	Hs.461988	NM_018999	ENSG00000107771	CCSER2	FAM190B|Gcap14|KIAA1128|bA486O22.1	coiled-coil serine rich protein 2	protein-coding
Yap_catlast-only89i_peak_24075	chr7	5728952	5729747	+	251	NA	intron (NM_207111, intron 13 of 16)	AluSx|SINE|Alu	-9257	NR_046834	100874342	Hs.665728	NR_046834	ENSG00000237738	RNF216-IT1	-	RNF216 intronic transcript 1	ncRNA	RNF216-IT1
Yap_catlast-only89i_peak_11433	chr17	16427956	16428539	+	250	NA	Intergenic	AluSx|SINE|Alu	-32742	NM_207387	388341	Hs.25425	NM_207387	ENSG00000181350	LRRC75A	C17orf76|FAM211A	leucine rich repeat containing 75A	protein-coding	LRRC75A
Yap_catlast-only89i_peak_20856	chr5	42950739	42951113	+	250	NA	Intergenic	Intergenic	42509	NR_104643	643977	Hs.535791	NR_104643		FLJ32255	-	uncharacterized LOC643977	ncRNA	FLJ32255
Yap_catlast-only89i_peak_9430	chr15	39871903	39872281	+	250	NA	Intergenic	Intergenic	-1188	NM_003246	7057	Hs.164226	NM_003246	ENSG00000137801	THBS1	THBS|THBS-1|TSP|TSP-1|TSP1	thrombospondin 1	protein-coding	THBS1
Yap_catlast-only89i_peak_13766	chr19	47479265	47479983	+	250	NA	intron (NM_004491, intron 2 of 5)	intron (NM_004491, intron 2 of 5)	-43477	NM_002517	4861	Hs.79564	NM_002517	ENSG00000130751	NPAS1	MOP5|PASD5|bHLHe11	neuronal PAS domain protein 1	protein-coding	NPAS1
Yap_catlast-only89i_peak_12283	chr17	75120271	75120825	+	249	NA	intron (NM_001204408, intron 3 of 19)	intron (NM_001204408, intron 3 of 19)	-16457	NM_001039573	6397	Hs.464184	NM_003003	ENSG00000129657	SEC14L1	PRELID4A|SEC14L	SEC14 like lipid binding 1	protein-coding
Yap_catlast-only89i_peak_8058	chr13	49888081	49888501	+	248	NA	intron (NM_001079670, intron 10 of 10)	intron (NM_001079670, intron 10 of 10)	66244	NM_030911	81602	Hs.388220	NM_030911	ENSG00000102543	CDADC1	NYD-SP15|bA103J18.1	cytidine and dCMP deaminase domain containing 1	protein-coding	CDADC1
Yap_catlast-only89i_peak_25347	chr7	130013191	130013708	+	248	NA	Intergenic	Intergenic	-6481	NR_133928	105375504	Hs.436058	NR_133928		LOC105375504	-	uncharacterized LOC105375504	ncRNA
Yap_catlast-only89i_peak_16099	chr20	33510436	33510829	+	248	NA	intron (NM_018677, intron 13 of 17)	MIRc|SINE|MIR	32806	NM_001322495	2937	Hs.82327	NM_000178	ENSG00000100983	GSS	GSHS|HEL-S-64p|HEL-S-88n	glutathione synthetase	protein-coding
Yap_catlast-only89i_peak_1941	chr1	180555995	180556374	+	247	NA	Intergenic	AluJb|SINE|Alu	28074	NR_125716	148756		NR_125716	ENSG00000236719	OVAAL	LINC01131|OVAL	ovarian adenocarcinoma amplified long non-coding RNA	ncRNA	OVAAL
Yap_catlast-only89i_peak_13854	chr19	50268635	50269255	+	247	NA	Intergenic	Intergenic	-1235	NM_130787	160	Hs.467125	NM_014203	ENSG00000196961	AP2A1	ADTAA|AP2-ALPHA|CLAPA1	adaptor related protein complex 2 alpha 1 subunit	protein-coding
Yap_catlast-only89i_peak_9656	chr15	63142953	63143376	+	247	NA	Intergenic	Intergenic	27008	NR_029709	406965		NR_029709	ENSG00000211137	MIR190A	MIR190|MIRN190|hsa-mir-190a|miR-190|mir-190a	microRNA 190a	ncRNA	MIR190A
Yap_catlast-only89i_peak_17898	chr3	48025610	48025933	+	247	NA	intron (NM_001134364, intron 2 of 17)	AluJr4|SINE|Alu	104998	NM_030885	4134	Hs.517949	NM_002375	ENSG00000047849	MAP4	-	microtubule associated protein 4	protein-coding
Yap_catlast-only89i_peak_19576	chr4	39708426	39708863	+	247	NA	intron (NM_001111113, intron 1 of 4)	AluSx|SINE|Alu	8980	NM_001312647	3093	Hs.50308	NM_005339	ENSG00000078140	UBE2K	E2-25K|HIP2|HYPG|LIG|UBC1	ubiquitin conjugating enzyme E2 K	protein-coding
Yap_catlast-only89i_peak_20174	chr4	148675090	148675522	+	247	NA	intron (NM_024605, intron 1 of 22)	intron (NM_024605, intron 1 of 22)	21853	NM_024605	79658	Hs.368631	NM_024605	ENSG00000071205	ARHGAP10	GRAF2|PS-GAP|PSGAP	Rho GTPase activating protein 10	protein-coding	ARHGAP10
Yap_catlast-only89i_peak_25623	chr8	7770407	7770857	+	247	NA	Intergenic	L1MEc|LINE|L1	-13227	NM_001193630	100132396	Hs.546691	NM_001193630	ENSG00000215356	ZNF705B	-	zinc finger protein 705B	protein-coding	ZNF705B
Yap_catlast-only89i_peak_3771	chr10	98610525	98610957	+	247	NA	intron (NM_032440, intron 2 of 7)	Tigger4|DNA|TcMar-Tigger	18029	NM_032440	84458	Hs.427927	NM_015652	ENSG00000196233	LCOR	C10orf12|MLR2	ligand dependent nuclear receptor corepressor	protein-coding
Yap_catlast-only89i_peak_24131	chr7	12700002	12700403	+	247	NA	Intergenic	HERVH-int|LTR|ERV1	-26250	NM_001037164	10124	Hs.245540	NM_005738	ENSG00000122644	ARL4A	ARL4	ADP ribosylation factor like GTPase 4A	protein-coding
Yap_catlast-only89i_peak_1872	chr1	172887065	172887480	+	247	NA	Intergenic	Intergenic	132831	NM_005092	8995	Hs.248197	NM_005092	ENSG00000120337	TNFSF18	AITRL|GITRL|TL6|TNLG2A|hGITRL	tumor necrosis factor superfamily member 18	protein-coding	TNFSF18
Yap_catlast-only89i_peak_6887	chr12	56465381	56465978	+	247	NA	Intergenic	AluJb|SINE|Alu	-8130	NM_001982	2065	Hs.118681	NM_001982	ENSG00000065361	ERBB3	ErbB-3|HER3|LCCS2|MDA-BF-1|c-erbB-3|c-erbB3|erbB3-S|p180-ErbB3|p45-sErbB3|p85-sErbB3	erb-b2 receptor tyrosine kinase 3	protein-coding	ERBB3
Yap_catlast-only89i_peak_6686	chr12	48472685	48473137	+	247	NA	intron (NR_051991, intron 7 of 18)	AluJb|SINE|Alu	-26745	NM_001166686	5213	Hs.75160	NM_000289	ENSG00000152556	PFKM	ATP-PFK|GSD7|PFK-1|PFK1|PFKA|PFKX|PPP1R122	phosphofructokinase, muscle	protein-coding
Yap_catlast-only89i_peak_6500	chr12	25648482	25648968	+	247	NA	TTS (NM_001145727)	TTS (NM_001145727)	57492	NM_001145728	160492	Hs.44647	NM_152590	ENSG00000152936	LMNTD1	IFLTD1|LMNARS1|PAS1C1	lamin tail domain containing 1	protein-coding
Yap_catlast-only89i_peak_23755	chr6	140074556	140074943	+	247	NA	Intergenic	Tigger15a|DNA|TcMar-Tigger	-17461	NR_038399	100132735	Hs.62646	NR_038399		LOC100132735	-	uncharacterized LOC100132735	ncRNA	LOC100132735
Yap_catlast-only89i_peak_9039	chr14	76114622	76114979	+	247	NA	TTS (NM_017791)	TTS (NM_017791)	12738	NM_007176	11161	Hs.15106	NM_007176	ENSG00000133935	C14orf1	ERG28|NET51	chromosome 14 open reading frame 1	protein-coding	C14orf1
Yap_catlast-only89i_peak_13514	chr19	36618649	36619094	+	247	NA	Intergenic	CpG	-11957	NM_001003962	826	Hs.515371	NM_001749	ENSG00000126247	CAPNS1	CALPAIN4|CANP|CANPS|CAPN4|CDPS|CSS1	calpain small subunit 1	protein-coding
Yap_catlast-only89i_peak_15832	chr20	10287695	10287963	+	246	NA	3' UTR (NM_130811, exon 8 of 8)	3' UTR (NM_130811, exon 8 of 8)	-87675	NR_040710	100131208	Hs.658178	NR_040710	ENSG00000227906	SNAP25-AS1	-	SNAP25 antisense RNA 1	ncRNA	SNAP25-AS1
Yap_catlast-only89i_peak_27644	chr9	81637977	81638636	+	246	NA	Intergenic	Intergenic	122275	NR_109771	101927450	Hs.738041	NR_109771	ENSG00000260995	LOC101927450	-	uncharacterized LOC101927450	ncRNA	LOC101927450
Yap_catlast-only89i_peak_25530	chr7	150066188	150066564	+	246	NA	intron (NM_001099696, intron 1 of 1)	intron (NM_001099696, intron 1 of 1)	497	NM_001099695	29803	Hs.647086	NM_013400	ENSG00000214022	REPIN1	AP4|RIP60|ZNF464|Zfp464	replication initiator 1	protein-coding
Yap_catlast-only89i_peak_14458	chr2	62899920	62900267	+	246	NA	promoter-TSS (NM_001142615)	promoter-TSS (NM_001142615)	-893	NM_001142615	23301	Hs.271667	NM_015252	ENSG00000115504	EHBP1	HPC12|NACSIN	EH domain binding protein 1	protein-coding
Yap_catlast-only89i_peak_14504	chr2	68144318	68145147	+	246	NA	Intergenic	Intergenic	-92038	NR_110271	101927701	Hs.348697	NR_110271	ENSG00000237013	LINC01812	-	long intergenic non-protein coding RNA 1812	ncRNA
Yap_catlast-only89i_peak_12363	chr17	79367544	79368123	+	246	NA	Intergenic	CpG	-5688	NM_001291324	57597	Hs.514580	NM_024696	ENSG00000266074	BAHCC1	BAHD2	BAH domain and coiled-coil containing 1	protein-coding
Yap_catlast-only89i_peak_11504	chr17	19047778	19047919	+	246	NA	intron (NM_001129778, intron 3 of 3)	(CA)n|Simple_repeat|Simple_repeat	17066	NM_001129778	400581	Hs.647426	NM_001129778	ENSG00000189152	GRAPL	-	GRB2 related adaptor protein like	protein-coding	GRAPL
Yap_catlast-only89i_peak_19623	chr4	48130008	48130514	+	246	NA	intron (NM_003328, intron 1 of 14)	intron (NM_003328, intron 1 of 14)	6012	NM_003328	7294	Hs.479669	NM_003328	ENSG00000074966	TXK	BTKL|PSCTK5|PTK4|RLK|TKL	TXK tyrosine kinase	protein-coding	TXK
Yap_catlast-only89i_peak_16608	chr21	17936115	17936405	+	246	NA	intron (NR_136547, intron 2 of 2)	intron (NR_136547, intron 2 of 2)	24112	NR_029480	406885		NR_029480	ENSG00000199030	MIRLET7C	LET7C|MIRNLET7C|hsa-let-7c|let-7c	microRNA let-7c	ncRNA	MIRLET7C
Yap_catlast-only89i_peak_10726	chr16	69951617	69952333	+	246	NA	intron (NM_007014, intron 11 of 24)	intron (NM_007014, intron 11 of 24)	-6911	NM_199424	11060	Hs.408458	NM_007014	ENSG00000198373	WWP2	AIP2|WWp2-like	WW domain containing E3 ubiquitin protein ligase 2	protein-coding
Yap_catlast-only89i_peak_12342	chr17	77925656	77926020	+	246	NA	intron (NM_019020, intron 4 of 11)	intron (NM_019020, intron 4 of 11)	-1182	NM_001271846	125058	Hs.369819	NM_019020	ENSG00000167291	TBC1D16	-	TBC1 domain family member 16	protein-coding
Yap_catlast-only89i_peak_871	chr1	45196812	45197274	+	246	NA	Intergenic	Intergenic	-8447	NM_006845	11004	Hs.720061	NM_006845	ENSG00000142945	KIF2C	CT139|KNSL6|MCAK	kinesin family member 2C	protein-coding	KIF2C
Yap_catlast-only89i_peak_10627	chr16	66642506	66642884	+	246	NA	intron (NM_144601, intron 3 of 5)	intron (NM_144601, intron 3 of 5)	4061	NR_037619	123920	Hs.298198	NM_144601	ENSG00000140931	CMTM3	BNAS2|CKLFSF3	CKLF like MARVEL transmembrane domain containing 3	protein-coding
Yap_catlast-only89i_peak_10839	chr16	77332524	77332885	+	246	NA	intron (NM_199355, intron 17 of 22)	AluJb|SINE|Alu	99355	NM_001129979	100130958	Hs.734779	NM_001129979	ENSG00000205078	SYCE1L	MRP2	synaptonemal complex central element protein 1 like	protein-coding	SYCE1L
Yap_catlast-only89i_peak_24479	chr7	41956107	41956509	+	246	NA	Intergenic	Intergenic	-213602	NM_002192	3624	Hs.28792	NM_002192	ENSG00000122641	INHBA	EDF|FRP	inhibin beta A subunit	protein-coding	INHBA
Yap_catlast-only89i_peak_22829	chr6	35453076	35453478	+	246	NA	intron (NM_003214, intron 2 of 12)	intron (NM_003214, intron 2 of 12)	11584	NM_003214	7005	Hs.485205	NM_003214	ENSG00000007866	TEAD3	DTEF-1|ETFR-1|TEAD-3|TEAD5|TEF-5|TEF5	TEA domain transcription factor 3	protein-coding	TEAD3
Yap_catlast-only89i_peak_10848	chr16	80231666	80231998	+	246	NA	intron (NR_120307, intron 2 of 5)	MLT1I|LTR|ERVL-MaLR	-342799	NM_001305017	83657	Hs.98849	NM_130897	ENSG00000168589	DYNLRB2	DNCL2B|DNLC2B|ROBLD2	dynein light chain roadblock-type 2	protein-coding
Yap_catlast-only89i_peak_10797	chr16	73210319	73210809	+	246	NA	Intergenic	Intergenic	-32218	NM_207385	388289	Hs.371893	NM_207385		C16orf47	-	chromosome 16 open reading frame 47	protein-coding	C16orf47
Yap_catlast-only89i_peak_16895	chr22	18056480	18056898	+	246	NA	intron (NM_031481, intron 2 of 10)	intron (NM_031481, intron 2 of 10)	13550	NM_031481	83733	Hs.282982	NM_031481	ENSG00000182902	SLC25A18	GC2	solute carrier family 25 member 18	protein-coding	SLC25A18
Yap_catlast-only89i_peak_3182	chr10	62144474	62144840	+	246	NA	intron (NM_001204403, intron 2 of 43)	L2a|LINE|L2	5085	NM_020987	288	Hs.499725	NM_001149	ENSG00000151150	ANK3	ANKYRIN-G|MRT37	ankyrin 3	protein-coding
Yap_catlast-only89i_peak_10138	chr16	3081629	3081965	+	246	NA	promoter-TSS (NR_047572)	promoter-TSS (NR_047572)	-685	NR_047572	100128770	Hs.666223	NR_047572	ENSG00000205890	LOC100128770	-	uncharacterized LOC100128770	ncRNA	LOC100128770
Yap_catlast-only89i_peak_6368	chr12	12857575	12857907	+	246	NA	Intergenic	Intergenic	-8620	NM_006143	2842	Hs.657862	NM_006143	ENSG00000183150	GPR19	-	G protein-coupled receptor 19	protein-coding	GPR19
Yap_catlast-only89i_peak_22928	chr6	39850290	39850881	+	245	NA	intron (NM_001201427, intron 14 of 24)	intron (NM_001201427, intron 14 of 24)	14571	NR_125831	100505635	Hs.668513	NR_125831	ENSG00000235033	LOC100505635	-	uncharacterized LOC100505635	ncRNA	LOC100505635
Yap_catlast-only89i_peak_4472	chr11	10915314	10915714	+	245	NA	Intergenic	Intergenic	35750	NR_034137	729013	Hs.726427	NR_034137	ENSG00000247271	ZBED5-AS1	-	ZBED5 antisense RNA 1	ncRNA	ZBED5-AS1
Yap_catlast-only89i_peak_2153	chr1	205267570	205267972	+	245	NA	Intergenic	Intergenic	23148	NM_030952	81788	Hs.497512	NM_030952	ENSG00000163545	NUAK2	SNARK	NUAK family kinase 2	protein-coding	NUAK2
Yap_catlast-only89i_peak_1599	chr1	144989442	144989807	+	245	NA	intron (NM_001002810, intron 1 of 3)	intron (NM_001002810, intron 1 of 3)	5409	NM_001002810	9659	Hs.584841	NM_014644	ENSG00000178104	PDE4DIP	CMYA2|MMGL	phosphodiesterase 4D interacting protein	protein-coding
Yap_catlast-only89i_peak_18457	chr3	125120131	125120687	+	245	NA	Intergenic	Intergenic	-26211	NM_021964	7707	Hs.592591	NM_021964	ENSG00000163848	ZNF148	BERF-1|BFCOL1|HT-BETA|ZBP-89|ZFP148|pHZ-52	zinc finger protein 148	protein-coding	ZNF148
Yap_catlast-only89i_peak_25545	chr7	151188882	151189368	+	245	NA	intron (NM_005614, intron 1 of 7)	intron (NM_005614, intron 1 of 7)	27885	NM_005614	6009	Hs.283521	NM_005614	ENSG00000106615	RHEB	RHEB2	Ras homolog enriched in brain	protein-coding	RHEB
Yap_catlast-only89i_peak_22068	chr5	172175339	172175910	+	245	NA	Intergenic	CpG	-6882	NM_001287812	101928093	Hs.646902	NM_001287812		LOC101928093	-	uncharacterized LOC101928093	protein-coding	LOC101928093
Yap_catlast-only89i_peak_230	chr1	14091007	14091370	+	245	NA	intron (NM_001135610, intron 6 of 7)	intron (NM_001135610, intron 6 of 7)	15312	NM_001007257	7799	Hs.371823	NM_012231	ENSG00000116731	PRDM2	HUMHOXY1|KMT8|KMT8A|MTB-ZF|RIZ|RIZ1|RIZ2	PR/SET domain 2	protein-coding
Yap_catlast-only89i_peak_27651	chr9	82225933	82226428	+	245	NA	intron (NM_001282760, intron 5 of 20)	intron (NM_001282760, intron 5 of 20)	39492	NR_104239	7091	Hs.444213	NM_007005	ENSG00000106829	TLE4	BCE-1|BCE1|E(spI)|ESG|ESG4|GRG4|Grg-4	transducin like enhancer of split 4	protein-coding
Yap_catlast-only89i_peak_8875	chr14	68858344	68858735	+	245	NA	intron (NM_001321809, intron 8 of 11)	intron (NM_001321809, intron 8 of 11)	236965	NR_135816	100996664		NR_135816		LOC100996664	-	uncharacterized LOC100996664	ncRNA
Yap_catlast-only89i_peak_5917	chr11	118792802	118793106	+	245	NA	Intergenic	Intergenic	-11341	NM_182557	283149	Hs.414740	NM_182557	ENSG00000186174	BCL9L	BCL9-2|DLNB11	B-cell CLL/lymphoma 9-like	protein-coding	BCL9L
Yap_catlast-only89i_peak_13816	chr19	48991294	48991583	+	245	NA	intron (NM_001080434, intron 15 of 15)	intron (NM_001080434, intron 15 of 15)	18973	NM_017457	9266	Hs.144011	NM_004228	ENSG00000105443	CYTH2	ARNO|CTS18|CTS18.1|PSCD2|PSCD2L|SEC7L|Sec7p-L|Sec7p-like|cytohesin-2	cytohesin 2	protein-coding
Yap_catlast-only89i_peak_10474	chr16	48369867	48370265	+	245	NA	intron (NM_031490, intron 12 of 14)	intron (NM_031490, intron 12 of 14)	-19530	NR_040677	83752	Hs.295923	NM_031490	ENSG00000102910	LONP2	LONP|LONPL|PLON|PSLON	lon peptidase 2, peroxisomal	protein-coding
Yap_catlast-only89i_peak_14331	chr2	44460675	44461034	+	245	NA	3' UTR (NM_177968, exon 6 of 6)	3' UTR (NM_177968, exon 6 of 6)	-41743	NM_000341	6519	Hs.112916	NM_000341	ENSG00000138079	SLC3A1	ATR1|CSNU1|D2H|NBAT|RBAT	solute carrier family 3 member 1	protein-coding	SLC3A1
Yap_catlast-only89i_peak_28954	chrX	149252866	149253383	+	245	NA	Intergenic	Intergenic	-143115	NR_031748	100313839		NR_031748	ENSG00000252454	MIR2114	-	microRNA 2114	ncRNA	MIR2114
Yap_catlast-only89i_peak_26009	chr8	32215530	32215815	+	245	NA	intron (NM_013962, intron 1 of 4)	MLT1J|LTR|ERVL-MaLR	-82590	NR_047475	100874286	Hs.147060	NR_047475	ENSG00000254049	NRG1-IT3	-	NRG1 intronic transcript 3	ncRNA	NRG1-IT3
Yap_catlast-only89i_peak_5931	chr11	119194106	119194540	+	245	NA	Intergenic	Intergenic	-6483	NM_006500	4162	Hs.599039	NM_006500	ENSG00000076706	MCAM	CD146|MUC18	melanoma cell adhesion molecule	protein-coding	MCAM
Yap_catlast-only89i_peak_454	chr1	24336027	24336226	+	244	NA	Intergenic	Intergenic	-29173	NM_006625	10772	Hs.3530	NM_006625	ENSG00000188529	SRSF10	FUSIP1|FUSIP2|NSSR|PPP1R149|SFRS13|SFRS13A|SRp38|SRrp40|TASR|TASR1|TASR2	serine and arginine rich splicing factor 10	protein-coding	SRSF10
Yap_catlast-only89i_peak_26787	chr8	121666519	121667045	+	244	NA	intron (NM_021021, intron 2 of 6)	intron (NM_021021, intron 2 of 6)	-106711	NR_125419	101927543	Hs.371902	NR_125419	ENSG00000248318	LOC101927543	-	uncharacterized LOC101927543	ncRNA	LOC101927543
Yap_catlast-only89i_peak_945	chr1	53611814	53612296	+	244	NA	Intergenic	Intergenic	-3751	NM_006671	6512	Hs.104637	NM_006671	ENSG00000162383	SLC1A7	AAAT|EAAT5	solute carrier family 1 member 7	protein-coding	SLC1A7
Yap_catlast-only89i_peak_13803	chr19	48232769	48233140	+	244	NA	intron (NM_014601, intron 4 of 5)	intron (NM_014601, intron 4 of 5)	-15839	NM_015710	29997	Hs.421907	NM_015710	ENSG00000105373	GLTSCR2	PICT-1|PICT1	glioma tumor suppressor candidate region gene 2	protein-coding	GLTSCR2
Yap_catlast-only89i_peak_21763	chr5	144741853	144742144	+	244	NA	Intergenic	L2c|LINE|L2	472934	NM_138492	153768	Hs.314261	NM_138492	ENSG00000186314	PRELID2	-	PRELI domain containing 2	protein-coding	PRELID2
Yap_catlast-only89i_peak_15516	chr2	225965003	225965342	+	244	NA	Intergenic	L1MEf|LINE|L1	-57842	NM_014689	55619	Hs.46578	NM_014689	ENSG00000135905	DOCK10	DRIP2|Nbla10300|ZIZ3	dedicator of cytokinesis 10	protein-coding	DOCK10
Yap_catlast-only89i_peak_15627	chr2	236007528	236007808	+	243	NA	Intergenic	Intergenic	147040	NM_014521	23677	Hs.516777	NM_014521	ENSG00000130147	SH3BP4	BOG25|TTP	SH3 domain binding protein 4	protein-coding	SH3BP4
Yap_catlast-only89i_peak_22414	chr6	11609548	11610098	+	243	NA	Intergenic	Intergenic	71363	NM_001100829	100113407	Hs.146317	NM_001100829	ENSG00000205269	TMEM170B	-	transmembrane protein 170B	protein-coding	TMEM170B
Yap_catlast-only89i_peak_3768	chr10	98574086	98574536	+	243	NA	Intergenic	AluJr|SINE|Alu	14210	NR_030338	693192		NR_030338	ENSG00000207976	MIR607	MIRN607|hsa-mir-607	microRNA 607	ncRNA	MIR607
Yap_catlast-only89i_peak_26944	chr8	129121139	129121555	+	243	NA	Intergenic	Intergenic	-41015	NR_031613	100302281		NR_031613	ENSG00000221261	MIR1208	MIRN1208|hsa-mir-1208	microRNA 1208	ncRNA	MIR1208
Yap_catlast-only89i_peak_944	chr1	53578029	53578467	+	243	NA	intron (NM_001287596, intron 3 of 3)	LTR78|LTR|ERV1	30056	NM_001287596	6512	Hs.104637	NM_006671	ENSG00000162383	SLC1A7	AAAT|EAAT5	solute carrier family 1 member 7	protein-coding
Yap_catlast-only89i_peak_8262	chr13	102108163	102108575	+	243	NA	intron (NM_001271755, intron 2 of 9)	intron (NM_001271755, intron 2 of 9)	3425	NM_001271755	9358	Hs.696554	NM_004791	ENSG00000198542	ITGBL1	OSCP|TIED	integrin subunit beta like 1	protein-coding
Yap_catlast-only89i_peak_26765	chr8	119779108	119779384	+	243	NA	Intergenic	L2|LINE|L2	-145012	NR_109794	401474	Hs.359393	NM_207506	ENSG00000177570	SAMD12	-	sterile alpha motif domain containing 12	protein-coding
Yap_catlast-only89i_peak_5590	chr11	86430856	86431250	+	243	NA	Intergenic	Intergenic	-47375	NM_001161586	10873	Hs.199743	NM_006680	ENSG00000151376	ME3	NADP-ME	malic enzyme 3	protein-coding
Yap_catlast-only89i_peak_21569	chr5	134178174	134178540	+	243	NA	Intergenic	Intergenic	-3013	NM_152409	134553	Hs.708536	NM_152409	ENSG00000181904	C5orf24	-	chromosome 5 open reading frame 24	protein-coding	C5orf24
Yap_catlast-only89i_peak_12663	chr18	24229741	24229929	+	243	NA	intron (NM_001258222, intron 1 of 4)	intron (NM_001258222, intron 1 of 4)	7530	NM_001258222	284252	Hs.526630	NM_198991	ENSG00000134504	KCTD1	C18orf5|SENS	potassium channel tetramerization domain containing 1	protein-coding
Yap_catlast-only89i_peak_5986	chr11	122034100	122034474	+	243	NA	intron (NR_137179, intron 3 of 4)	MER117|DNA|hAT-Charlie	-6466	NR_137186	399959	Hs.44098	NR_024430		MIR100HG	AGD1|linc-NeD125|lncRNA-N2	mir-100-let-7a-2 cluster host gene	ncRNA
Yap_catlast-only89i_peak_6764	chr12	52373178	52373448	+	242	NA	intron (NM_020328, intron 3 of 9)	L2c|LINE|L2	26149	NM_020327	91	Hs.438918	NM_004302	ENSG00000135503	ACVR1B	ACTRIB|ACVRLK4|ALK4|SKR2	activin A receptor type 1B	protein-coding
Yap_catlast-only89i_peak_18281	chr3	105546847	105547123	+	242	NA	intron (NR_135810, intron 3 of 20)	MLT1J|LTR|ERVL-MaLR	39450	NM_001321813	868	Hs.430589	NM_170662	ENSG00000114423	CBLB	Cbl-b|Nbla00127|RNF56	Cbl proto-oncogene B	protein-coding
Yap_catlast-only89i_peak_1743	chr1	156473113	156473423	+	241	NA	Intergenic	Intergenic	-2634	NM_005920	4209	Hs.314327	NM_005920	ENSG00000116604	MEF2D	-	myocyte enhancer factor 2D	protein-coding	MEF2D
Yap_catlast-only89i_peak_15611	chr2	235583433	235583666	+	241	NA	Intergenic	(CAAAA)n|Simple_repeat|Simple_repeat	-7763	NR_132376	106144537	Hs.580616	NR_132376	ENSG00000280744	LINC01173	-	long intergenic non-protein coding RNA 1173	ncRNA
Yap_catlast-only89i_peak_15088	chr2	171595617	171596210	+	241	NA	intron (NR_110185, intron 1 of 5)	L2a|LINE|L2	24056	NM_001003845	389058	Hs.368802	NM_001003845	ENSG00000204335	SP5	-	Sp5 transcription factor	protein-coding	SP5
Yap_catlast-only89i_peak_27274	chr9	14221438	14221997	+	241	NA	intron (NM_001190737, intron 2 of 10)	intron (NM_001190737, intron 2 of 10)	-40916	NM_001282787	4781	Hs.644095	NM_005596	ENSG00000147862	NFIB	CTF|HMGIC/NFIB|NF-I/B|NF1-B|NFI-B|NFI-RED|NFIB2|NFIB3	nuclear factor I B	protein-coding
Yap_catlast-only89i_peak_5824	chr11	110343523	110343838	+	241	NA	Intergenic	Intergenic	43019	NM_004109	2230	Hs.744	NM_004109	ENSG00000137714	FDX1	ADX|FDX|LOH11CR1D	ferredoxin 1	protein-coding	FDX1
Yap_catlast-only89i_peak_14722	chr2	106021662	106022053	+	240	NA	intron (NM_201557, intron 1 of 5)	intron (NM_201557, intron 1 of 5)	-5733	NM_001318894	2274	Hs.443687	NM_001450	ENSG00000115641	FHL2	AAG11|DRAL|FHL-2|SLIM-3|SLIM3	four and a half LIM domains 2	protein-coding
Yap_catlast-only89i_peak_12838	chr18	55515629	55516049	+	240	NA	Intergenic	AluJr|SINE|Alu	-45512	NM_005603	5205	Hs.216623	NM_005603	ENSG00000081923	ATP8B1	ATPIC|BRIC|FIC1|ICP1|PFIC|PFIC1	ATPase phospholipid transporting 8B1	protein-coding	ATP8B1
Yap_catlast-only89i_peak_27828	chr9	101250866	101251268	+	240	NA	intron (NM_005458, intron 4 of 18)	intron (NM_005458, intron 4 of 18)	220412	NM_005458	9568	Hs.198612	NM_005458	ENSG00000136928	GABBR2	GABABR2|GPR51|GPRC3B|HG20|HRIHFB2099	gamma-aminobutyric acid type B receptor subunit 2	protein-coding	GABBR2
Yap_catlast-only89i_peak_1459	chr1	110419863	110420263	+	240	NA	Intergenic	Intergenic	-33170	NM_000757	1435	Hs.173894	NM_000757	ENSG00000184371	CSF1	CSF-1|MCSF	colony stimulating factor 1	protein-coding	CSF1
Yap_catlast-only89i_peak_4341	chr11	3926643	3926986	+	240	NA	intron (NM_003156, intron 1 of 11)	intron (NM_003156, intron 1 of 11)	49522	NR_039835	100616453		NR_039835	ENSG00000167323	MIR4687	-	microRNA 4687	ncRNA	MIR4687
Yap_catlast-only89i_peak_4183	chr10	126919952	126920560	+	240	NA	Intergenic	MER5A1|DNA|hAT-Charlie	-70626	NM_001083914	1488	Hs.501345	NM_001329	ENSG00000175029	CTBP2	-	C-terminal binding protein 2	protein-coding
Yap_catlast-only89i_peak_27976	chr9	114799451	114799983	+	240	NA	Intergenic	L1M5|LINE|L1	105337	NR_039814	100616114		NR_039814	ENSG00000266315	MIR4668	mir-4668	microRNA 4668	ncRNA	MIR4668
Yap_catlast-only89i_peak_12667	chr18	25419219	25419541	+	240	NA	Intergenic	Intergenic	197169	NM_001308176	1000	Hs.464829	NM_001792	ENSG00000170558	CDH2	CD325|CDHN|CDw325|NCAD	cadherin 2	protein-coding
Yap_catlast-only89i_peak_23060	chr6	45759404	45759648	+	240	NA	Intergenic	Intergenic	145808	NR_045674	53405	Hs.485489	NM_016929	ENSG00000112782	CLIC5	DFNB102|DFNB103|MST130|MSTP130	chloride intracellular channel 5	protein-coding
Yap_catlast-only89i_peak_22289	chr6	3767807	3768085	+	240	NA	Intergenic	AluSg|SINE|Alu	-15700	NM_183373	221749	Hs.484500	NM_183373	ENSG00000168994	PXDC1	C6orf145	PX domain containing 1	protein-coding	PXDC1
Yap_catlast-only89i_peak_27957	chr9	113597730	113598125	+	240	NA	Intergenic	Intergenic	166876	NM_001166280	4593	Hs.521653	NM_005592	ENSG00000030304	MUSK	CMS9|FADS	muscle associated receptor tyrosine kinase	protein-coding
Yap_catlast-only89i_peak_7528	chr12	113993086	113993358	+	239	NA	Intergenic	Intergenic	-83345	NM_022363	64211	Hs.302029	NM_022363	ENSG00000089116	LHX5	-	LIM homeobox 5	protein-coding	LHX5
Yap_catlast-only89i_peak_27253	chr9	12680332	12680717	+	239	NA	Intergenic	Intergenic	-12862	NM_000550	7306	Hs.270279	NM_000550	ENSG00000107165	TYRP1	CAS2|CATB|GP75|OCA3|TRP|TRP1|TYRP|b-PROTEIN	tyrosinase related protein 1	protein-coding	TYRP1
Yap_catlast-only89i_peak_26310	chr8	64144453	64144707	+	239	NA	Intergenic	HERVL40-int|LTR|ERVL	63018	NM_001277818	253943	Hs.491861	NM_152758	ENSG00000185728	YTHDF3	-	YTH N6-methyladenosine RNA binding protein 3	protein-coding
Yap_catlast-only89i_peak_16646	chr21	28877875	28878173	+	239	NA	Intergenic	Intergenic	-216674	NR_024357	54088	Hs.570434	NR_024357	ENSG00000225298	LINC00113	C21orf23|NCRNA00113	long intergenic non-protein coding RNA 113	ncRNA	LINC00113
Yap_catlast-only89i_peak_9432	chr15	39872936	39873466	+	239	NA	promoter-TSS (NM_003246)	promoter-TSS (NM_003246)	-79	NM_003246	7057	Hs.164226	NM_003246	ENSG00000137801	THBS1	THBS|THBS-1|TSP|TSP-1|TSP1	thrombospondin 1	protein-coding	THBS1
Yap_catlast-only89i_peak_824	chr1	43406655	43407161	+	239	NA	intron (NM_006516, intron 2 of 9)	intron (NM_006516, intron 2 of 9)	-17812	NR_033967	440584	Hs.260928	NR_033967	ENSG00000227533	SLC2A1-AS1	-	SLC2A1 antisense RNA 1	ncRNA	SLC2A1-AS1
Yap_catlast-only89i_peak_20979	chr5	57618403	57618656	+	238	NA	Intergenic	GA-rich|Low_complexity|Low_complexity	137437	NM_006622	10769	Hs.398157	NM_006622	ENSG00000145632	PLK2	SNK|hPlk2|hSNK	polo like kinase 2	protein-coding	PLK2
Yap_catlast-only89i_peak_28889	chrX	119868539	119868985	+	237	NA	Intergenic	Intergenic	-104757	NM_152692	29071	Hs.643920	NM_152692	ENSG00000171155	C1GALT1C1	C1GALT2|C38H2-L1|COSMC|HSPC067|MST143|TNPS	C1GALT1 specific chaperone 1	protein-coding	C1GALT1C1
Yap_catlast-only89i_peak_4401	chr11	8938975	8939429	+	237	NA	intron (NM_001206646, intron 4 of 4)	intron (NM_001206646, intron 4 of 4)	6463	NR_045417	56672	Hs.131180	NM_020642	ENSG00000166452	AKIP1	BCA3|C11orf17	A-kinase interacting protein 1	protein-coding
Yap_catlast-only89i_peak_6393	chr12	13288626	13288838	+	237	NA	Intergenic	Intergenic	-32102	NM_001206842	83445	Hs.240053	NM_031289	ENSG00000111305	GSG1	-	germ cell associated 1	protein-coding
Yap_catlast-only89i_peak_18657	chr3	140998954	140999200	+	237	NA	intron (NM_152282, intron 6 of 7)	intron (NM_152282, intron 6 of 7)	-43978	NM_001080412	253461	Hs.518301	NM_152535	ENSG00000177311	ZBTB38	CIBZ|PPP1R171|ZNF921	zinc finger and BTB domain containing 38	protein-coding
Yap_catlast-only89i_peak_15202	chr2	189961570	189962061	+	237	NA	intron (NM_000393, intron 6 of 53)	intron (NM_000393, intron 6 of 53)	36022	NR_036076	100422908		NR_036076	ENSG00000264725	MIR3129	mir-3129	microRNA 3129	ncRNA	MIR3129
Yap_catlast-only89i_peak_6495	chr12	25378556	25378691	+	237	NA	exon (NM_033360, exon 4 of 6)	exon (NM_033360, exon 4 of 6)	25242	NM_004985	3845	Hs.505033	NM_004985	ENSG00000133703	KRAS	C-K-RAS|CFC2|K-RAS2A|K-RAS2B|K-RAS4A|K-RAS4B|KI-RAS|KRAS1|KRAS2|NS|NS3|RALD|RASK2|c-Ki-ras2	KRAS proto-oncogene, GTPase	protein-coding	KRAS
Yap_catlast-only89i_peak_11120	chr17	854920	855384	+	237	NA	intron (NM_022463, intron 1 of 7)	intron (NM_022463, intron 1 of 7)	27846	NM_022463	64359	Hs.527989	NM_022463	ENSG00000167693	NXN	NRX|TRG-4	nucleoredoxin	protein-coding	NXN
Yap_catlast-only89i_peak_26162	chr8	42575484	42576068	+	237	NA	intron (NM_000749, intron 3 of 5)	L2c|LINE|L2	23214	NM_000749	1142	Hs.654576	NM_000749	ENSG00000147432	CHRNB3	-	cholinergic receptor nicotinic beta 3 subunit	protein-coding	CHRNB3
Yap_catlast-only89i_peak_17100	chr22	30310039	30310346	+	237	NA	intron (NM_021090, intron 1 of 19)	L1ME1|LINE|L1	31034	NM_153051	8897	Hs.474536	NM_021090	ENSG00000100330	MTMR3	FYVE-DSP1|ZFYVE10	myotubularin related protein 3	protein-coding
Yap_catlast-only89i_peak_6895	chr12	56590751	56591179	+	237	NA	Intergenic	Intergenic	-7607	NM_001330288	6601	Hs.236030	NM_003075	ENSG00000139613	SMARCC2	BAF170|CRACC2|Rsc8	SWI/SNF related, matrix associated, actin dependent regulator of chromatin subfamily c member 2	protein-coding
Yap_catlast-only89i_peak_13685	chr19	45106319	45107065	+	237	NA	Intergenic	Intergenic	-10248	NM_001205280	147710	Hs.512509	NM_001205280	ENSG00000216588	IGSF23	-	immunoglobulin superfamily member 23	protein-coding	IGSF23
Yap_catlast-only89i_peak_6081	chr11	128077711	128078562	+	237	NA	Intergenic	Intergenic	314069	NM_005238	2113	Hs.369438	NM_005238	ENSG00000134954	ETS1	ETS-1|EWSR2|c-ets-1|p54	ETS proto-oncogene 1, transcription factor	protein-coding	ETS1
Yap_catlast-only89i_peak_17230	chr22	37942019	37942482	+	237	NA	Intergenic	Intergenic	-14221	NM_152243	11135	Hs.225356	NM_152243	ENSG00000128283	CDC42EP1	BORG5|CEP1|MSE55	CDC42 effector protein 1	protein-coding	CDC42EP1
Yap_catlast-only89i_peak_1261	chr1	87692034	87692274	+	237	NA	intron (NM_001290053, intron 2 of 3)	intron (NM_001290053, intron 2 of 3)	13802	NM_001290053	101927844	Hs.694591	NM_001290053		LOC101927844	-	uncharacterized LOC101927844	protein-coding	LOC101927844
Yap_catlast-only89i_peak_13459	chr19	29195946	29196304	+	237	NA	intron (NR_110759, intron 5 of 9)	intron (NR_110759, intron 5 of 9)	22476	NR_110759	100420587	Hs.569956	NR_110759	ENSG00000283403	LOC100420587	-	SHC binding and spindle associated 1 pseudogene	pseudo	LOC100420587
Yap_catlast-only89i_peak_6181	chr12	1567095	1567522	+	237	NA	intron (NM_178039, intron 17 of 17)	intron (NM_178039, intron 17 of 17)	-42349	NR_028415	100292680	Hs.391695	NR_028415		LINC00942	-	long intergenic non-protein coding RNA 942	ncRNA	LINC00942
Yap_catlast-only89i_peak_15445	chr2	217970459	217970860	+	237	NA	Intergenic	Intergenic	-176797	NR_133642	105373877		NR_133642		DIRC3-AS1	-	DIRC3 antisense RNA 1	ncRNA
Yap_catlast-only89i_peak_18115	chr3	70898956	70899273	+	237	NA	Intergenic	Intergenic	214960	NM_001244813	27086	Hs.59368	NM_032682	ENSG00000114861	FOXP1	12CC4|HSPC215|MFH|QRF1|hFKH1B	forkhead box P1	protein-coding
Yap_catlast-only89i_peak_25561	chr7	152091428	152091698	+	237	NA	intron (NM_170606, intron 1 of 58)	L2a|LINE|L2	41527	NM_170606	58508	Hs.647120	NM_021230	ENSG00000055609	KMT2C	HALR|MLL3	lysine methyltransferase 2C	protein-coding
Yap_catlast-only89i_peak_3355	chr10	73599881	73600281	+	237	NA	intron (NM_001042465, intron 1 of 14)	intron (NM_001042465, intron 1 of 14)	11051	NM_002778	5660	Hs.523004	NM_002778	ENSG00000197746	PSAP	GLBA|SAP1	prosaposin	protein-coding	PSAP
Yap_catlast-only89i_peak_16249	chr20	42523970	42524324	+	237	NA	TTS (NR_134577)	TTS (NR_134577)	789	NR_134577	105372626	Hs.130555	NR_134577	ENSG00000233277	LINC01728	-	long intergenic non-protein coding RNA 1728	ncRNA
Yap_catlast-only89i_peak_1807	chr1	163172875	163173329	+	237	NA	promoter-TSS (NM_003617)	promoter-TSS (NM_003617)	-139	NM_001254749	8490	Hs.24950	NM_003617	ENSG00000143248	RGS5	MST092|MST106|MST129|MSTP032|MSTP092|MSTP106|MSTP129	regulator of G-protein signaling 5	protein-coding
Yap_catlast-only89i_peak_15848	chr20	10689447	10689799	+	237	NA	Intergenic	Intergenic	-34929	NM_000214	182	Hs.224012	NM_000214	ENSG00000101384	JAG1	AGS|AGS1|AHD|AWS|CD339|HJ1|JAGL1	jagged 1	protein-coding	JAG1
Yap_catlast-only89i_peak_8574	chr14	46523686	46524149	+	237	NA	Intergenic	Intergenic	-9445	NR_102701	100506412	Hs.207545	NR_102699	ENSG00000258700	LINC00871	-	long intergenic non-protein coding RNA 871	ncRNA
Yap_catlast-only89i_peak_17696	chr3	27594225	27594618	+	237	NA	Intergenic	HERVH-int|LTR|ERV1	-68510	NM_001321103	9497	Hs.250072	NM_003615	ENSG00000033867	SLC4A7	NBC2|NBC3|NBCN1|SBC2|SLC4A6	solute carrier family 4 member 7	protein-coding
Yap_catlast-only89i_peak_13228	chr19	11196079	11196521	+	237	NA	Intergenic	Intergenic	-3738	NM_001195799	3949	Hs.213289	NM_000527	ENSG00000130164	LDLR	FH|FHC|LDLCQ2	low density lipoprotein receptor	protein-coding
Yap_catlast-only89i_peak_322	chr1	18200588	18201375	+	237	NA	Intergenic	Intergenic	119173	NM_030812	81569	Hs.2149	NM_030812	ENSG00000117148	ACTL8	CT57	actin like 8	protein-coding	ACTL8
Yap_catlast-only89i_peak_12671	chr18	25645371	25645715	+	237	NA	intron (NM_001792, intron 2 of 15)	intron (NM_001792, intron 2 of 15)	-28994	NM_001308176	1000	Hs.464829	NM_001792	ENSG00000170558	CDH2	CD325|CDHN|CDw325|NCAD	cadherin 2	protein-coding
Yap_catlast-only89i_peak_21927	chr5	157375860	157376090	+	237	NA	Intergenic	Intergenic	-89792	NM_001195556	9685	Hs.644000	NM_014666	ENSG00000113282	CLINT1	CLINT|ENTH|EPN4|EPNR	clathrin interactor 1	protein-coding
Yap_catlast-only89i_peak_22514	chr6	17455045	17455477	+	237	NA	intron (NM_006366, intron 3 of 12)	MER50|LTR|ERV1	56235	NR_110855	101928491	Hs.622876	NR_110855		LOC101928491	-	uncharacterized LOC101928491	ncRNA	LOC101928491
Yap_catlast-only89i_peak_8470	chr14	30662958	30663482	+	237	NA	Intergenic	Intergenic	-266272	NM_001330069	5587	Hs.508999	NM_002742	ENSG00000184304	PRKD1	PKC-MU|PKCM|PKD|PRKCM	protein kinase D1	protein-coding
Yap_catlast-only89i_peak_11224	chr17	4064270	4064788	+	237	NA	Intergenic	L2b|LINE|L2	17614	NM_001254755	124936	Hs.513871	NM_144611	ENSG00000167740	CYB5D2	-	cytochrome b5 domain containing 2	protein-coding
Yap_catlast-only89i_peak_5222	chr11	65683227	65683649	+	237	NA	TTS (NM_001135635)	TTS (NM_001135635)	3093	NM_031450	83638	Hs.433573	NM_031450	ENSG00000175573	C11orf68	BLES03|P5326	chromosome 11 open reading frame 68	protein-coding	C11orf68
Yap_catlast-only89i_peak_28414	chrX	2767127	2767455	+	237	NA	intron (NM_003918, intron 4 of 11)	intron (NM_003918, intron 4 of 11)	20428	NM_003918	8908	Hs.567381	NM_003918	ENSG00000056998	GYG2	GN-2|GN2	glycogenin 2	protein-coding	GYG2
Yap_catlast-only89i_peak_28345	chr9	134902353	134902751	+	236	NA	intron (NM_004269, intron 2 of 7)	intron (NM_004269, intron 2 of 7)	52722	NM_001253882	9442	Hs.374262	NM_004269	ENSG00000160563	MED27	CRAP34|CRSP34|CRSP8|MED3|TRAP37	mediator complex subunit 27	protein-coding
Yap_catlast-only89i_peak_26334	chr8	67424561	67424833	+	236	NA	intron (NM_152765, intron 4 of 5)	intron (NM_152765, intron 4 of 5)	19206	NM_152765	254778	Hs.268869	NM_152765	ENSG00000169085	C8orf46	-	chromosome 8 open reading frame 46	protein-coding	C8orf46
Yap_catlast-only89i_peak_975	chr1	55400613	55400929	+	236	NA	Intergenic	PRIMAX-int|LTR|ERV1	-45566	NM_182532	199964	Hs.663950	NM_182532	ENSG00000143001	TMEM61	-	transmembrane protein 61	protein-coding	TMEM61
Yap_catlast-only89i_peak_4547	chr11	12915684	12915939	+	236	NA	intron (NM_021961, intron 9 of 12)	intron (NM_021961, intron 9 of 12)	95284	NR_038904	100506305	Hs.153408	NR_038904	ENSG00000251381	LINC00958	-	long intergenic non-protein coding RNA 958	ncRNA	LINC00958
Yap_catlast-only89i_peak_18176	chr3	81777916	81778293	+	236	NA	intron (NM_000158, intron 1 of 15)	intron (NM_000158, intron 1 of 15)	32846	NM_000158	2632	Hs.436062	NM_000158	ENSG00000114480	GBE1	APBD|GBE|GSD4	1,4-alpha-glucan branching enzyme 1	protein-coding	GBE1
Yap_catlast-only89i_peak_2680	chr10	14116315	14116775	+	236	NA	non-coding (NR_120638, exon 1 of 3)	non-coding (NR_120638, exon 1 of 3)	262	NR_120638	101928453	Hs.650212	NR_120638		LOC101928453	-	uncharacterized LOC101928453	ncRNA	LOC101928453
Yap_catlast-only89i_peak_10296	chr16	19119096	19119339	+	236	NA	Intergenic	AluJr|SINE|Alu	-6037	NM_001034841	162073	Hs.530899	NM_001034841	ENSG00000205730	ITPRIPL2	-	inositol 1,4,5-trisphosphate receptor interacting protein like 2	protein-coding	ITPRIPL2
Yap_catlast-only89i_peak_6085	chr11	128229481	128229805	+	236	NA	Intergenic	Intergenic	162562	NM_005238	2113	Hs.369438	NM_005238	ENSG00000134954	ETS1	ETS-1|EWSR2|c-ets-1|p54	ETS proto-oncogene 1, transcription factor	protein-coding	ETS1
Yap_catlast-only89i_peak_12677	chr18	26164693	26165021	+	236	NA	Intergenic	Intergenic	-407447	NM_001792	1000	Hs.464829	NM_001792	ENSG00000170558	CDH2	CD325|CDHN|CDw325|NCAD	cadherin 2	protein-coding	CDH2
Yap_catlast-only89i_peak_9178	chr14	93112153	93112502	+	236	NA	intron (NM_001319987, intron 4 of 8)	L1MB8|LINE|L1	69748	NM_001319987	79890	Hs.326822	NM_024832	ENSG00000100599	RIN3	-	Ras and Rab interactor 3	protein-coding
Yap_catlast-only89i_peak_7251	chr12	93474828	93475107	+	235	NA	intron (NR_040096, intron 3 of 4)	intron (NR_040096, intron 3 of 4)	-93175	NR_120492	102724933	Hs.663947	NR_120492	ENSG00000258171	LOC102724933	-	uncharacterized LOC102724933	ncRNA	LOC102724933
Yap_catlast-only89i_peak_13083	chr19	4575372	4575818	+	235	NA	Intergenic	Intergenic	-15824	NM_032108	10501	Hs.465642	NM_020241	ENSG00000167680	SEMA6B	SEM-SEMA-Y|SEMA-VIB|SEMAN|semaZ	semaphorin 6B	protein-coding
Yap_catlast-only89i_peak_19533	chr4	33838678	33839052	+	235	NA	Intergenic	Intergenic	202650	NR_125902	101928622	Hs.631687	NR_125902	ENSG00000250954	LOC101928622	-	uncharacterized LOC101928622	ncRNA	LOC101928622
Yap_catlast-only89i_peak_2876	chr10	29430073	29430314	+	235	NA	Intergenic	Intergenic	-147797	NM_032517	84569	Hs.558572	NM_032517	ENSG00000120563	LYZL1	KAAG648|LYC2|LYZD1|PRO1278|bA534G20.1	lysozyme like 1	protein-coding	LYZL1
Yap_catlast-only89i_peak_14859	chr2	129120407	129120867	+	235	NA	Intergenic	Intergenic	-44466	NM_004807	9394	Hs.512841	NM_004807	ENSG00000136720	HS6ST1	HH15|HS6ST	heparan sulfate 6-O-sulfotransferase 1	protein-coding	HS6ST1
Yap_catlast-only89i_peak_26812	chr8	122824128	122824519	+	235	NA	Intergenic	Intergenic	-170693	NM_005328	3037	Hs.159226	NM_005328	ENSG00000170961	HAS2	-	hyaluronan synthase 2	protein-coding	HAS2
Yap_catlast-only89i_peak_15341	chr2	204205463	204205885	+	235	NA	intron (NM_001282932, intron 1 of 9)	L2a|LINE|L2	12712	NM_001282932	10152	Hs.471156	NM_005759	ENSG00000138443	ABI2	ABI-2|ABI2B|AIP-1|AblBP3|SSH3BP2|argBP1|argBPIA|argBPIB	abl interactor 2	protein-coding
Yap_catlast-only89i_peak_26559	chr8	99002209	99002797	+	235	NA	intron (NM_001317748, intron 6 of 17)	L1ME1|LINE|L1	51942	NR_002581	26775	Hs.684855	NR_002581	ENSG00000207067	SNORA72	RNU72|U72	small nucleolar RNA, H/ACA box 72	snoRNA	SNORA72
Yap_catlast-only89i_peak_332	chr1	19378974	19379226	+	235	NA	Intergenic	Intergenic	-96274	NM_001136265	126917	Hs.466625	NM_001136265	ENSG00000169991	IFFO2	-	intermediate filament family orphan 2	protein-coding	IFFO2
Yap_catlast-only89i_peak_5331	chr11	69064692	69065219	+	235	NA	TTS (NM_001293296)	TTS (NM_001293296)	3350	NM_001300924	26579	Hs.523848	NM_138768	ENSG00000172927	MYEOV	OCIM	myeloma overexpressed	protein-coding
Yap_catlast-only89i_peak_19146	chr3	188349450	188349683	+	235	NA	intron (NM_001167671, intron 6 of 10)	Arthur1B|DNA|hAT-Tip100	-57003	NR_029502	407020		NR_029502	ENSG00000207651	MIR28	MIRN28|hsa-mir-28|miR-28	microRNA 28	ncRNA	MIR28
Yap_catlast-only89i_peak_23880	chr6	155568689	155569014	+	235	NA	intron (NM_001010927, intron 5 of 12)	intron (NM_001010927, intron 5 of 12)	-16296	NM_001001346	49861	Hs.567491	NM_001001346	ENSG00000171217	CLDN20	-	claudin 20	protein-coding	CLDN20
Yap_catlast-only89i_peak_17376	chr22	43583495	43583944	+	235	NA	promoter-TSS (NM_015140)	promoter-TSS (NM_015140)	-582	NM_015140	23170	Hs.517670	NM_015140	ENSG00000100304	TTLL12	dJ526I14.2	tubulin tyrosine ligase like 12	protein-coding	TTLL12
Yap_catlast-only89i_peak_4756	chr11	35188094	35188463	+	235	NA	intron (NM_001202556, intron 1 of 7)	intron (NM_001202556, intron 1 of 7)	27861	NM_001202556	960	Hs.502328	NM_000610	ENSG00000026508	CD44	CDW44|CSPG8|ECMR-III|HCELL|HUTCH-I|IN|LHR|MC56|MDU2|MDU3|MIC4|Pgp1	CD44 molecule (Indian blood group)	protein-coding
Yap_catlast-only89i_peak_13801	chr19	48222485	48222853	+	235	NA	intron (NM_014601, intron 3 of 5)	intron (NM_014601, intron 3 of 5)	6068	NM_014601	30846	Hs.744963	NM_014601	ENSG00000024422	EHD2	PAST2	EH domain containing 2	protein-coding	EHD2
Yap_catlast-only89i_peak_25084	chr7	103280540	103280823	+	235	NA	intron (NM_173054, intron 17 of 63)	intron (NM_173054, intron 17 of 63)	-194057	NM_206885	375611	Hs.585146	NM_198999	ENSG00000170615	SLC26A5	DFNB61|PRES	solute carrier family 26 member 5	protein-coding
Yap_catlast-only89i_peak_10283	chr16	17609703	17609988	+	235	NA	Intergenic	Intergenic	-45107	NM_022166	64131	Hs.22907	NM_022166	ENSG00000103489	XYLT1	DBQD2|PXYLT1|XT-I|XT1|XTI|XYLTI|xylT-I	xylosyltransferase 1	protein-coding	XYLT1
Yap_catlast-only89i_peak_23888	chr6	157469878	157470472	+	235	NA	intron (NM_020732, intron 9 of 19)	intron (NM_020732, intron 9 of 19)	275116	NM_018452	729515	Hs.157212	NM_018452	ENSG00000215712	TMEM242	BM033|C6orf35	transmembrane protein 242	protein-coding	TMEM242
Yap_catlast-only89i_peak_24491	chr7	43575497	43575751	+	234	NA	intron (NM_015052, intron 24 of 29)	intron (NM_015052, intron 24 of 29)	-13483	NR_038276	100506895	Hs.676047	NR_038276	ENSG00000231638	LOC100506895	-	lncRNA#32	ncRNA	LOC100506895
Yap_catlast-only89i_peak_26076	chr8	38259074	38259519	+	234	NA	intron (NM_001330515, intron 5 of 9)	intron (NM_001330515, intron 5 of 9)	14647	NM_001199660	137994	Hs.696457	NM_144652	ENSG00000165046	LETM2	-	leucine zipper and EF-hand containing transmembrane protein 2	protein-coding
Yap_catlast-only89i_peak_2806	chr10	21707975	21708319	+	234	NA	Intergenic	Intergenic	77423	NR_031736	100302129		NR_031736	ENSG00000222071	MIR1915	MIRN1915|hsa-mir-1915	microRNA 1915	ncRNA	MIR1915
Yap_catlast-only89i_peak_20570	chr5	14901112	14901546	+	234	NA	Intergenic	Intergenic	-29442	NM_054027	56172	Hs.156727	NM_054027	ENSG00000154122	ANKH	ANK|CCAL2|CMDJ|CPPDD|HANK|MANK	ANKH inorganic pyrophosphate transport regulator	protein-coding	ANKH
Yap_catlast-only89i_peak_18583	chr3	134146296	134146673	+	234	NA	Intergenic	Intergenic	-10185	NR_039951	100616281		NR_039951		MIR4788	-	microRNA 4788	ncRNA	MIR4788
Yap_catlast-only89i_peak_22245	chr6	2432481	2432950	+	234	NA	Intergenic	Intergenic	186728	NR_046229	100508120	Hs.188825	NR_046229		GMDS-AS1	-	GMDS antisense RNA 1 (head to head)	ncRNA	GMDS-AS1
Yap_catlast-only89i_peak_22291	chr6	3803834	3804228	+	234	NA	Intergenic	Intergenic	-45569	NM_012135	26240	Hs.140944	NM_012135	ENSG00000145945	FAM50B	D6S2654E|X5L	family with sequence similarity 50 member B	protein-coding	FAM50B
Yap_catlast-only89i_peak_17146	chr22	32046340	32046760	+	234	NA	intron (NM_001326420, intron 1 of 6)	intron (NM_001326420, intron 1 of 6)	12000	NM_001326413	23761	Hs.420559	NM_014338	ENSG00000241878	PISD	DJ858B16|PSD|PSDC|PSSC|dJ858B16.2	phosphatidylserine decarboxylase	protein-coding
Yap_catlast-only89i_peak_4854	chr11	45110732	45111364	+	234	NA	Intergenic	Intergenic	-4516	NR_046338	56981	Hs.178715	NM_020229	ENSG00000019485	PRDM11	PFM8	PR/SET domain 11	protein-coding
Yap_catlast-only89i_peak_25092	chr7	104652978	104653421	+	233	NA	non-coding (NR_024586, exon 1 of 1)	non-coding (NR_024586, exon 1 of 1)	1389	NR_024586	100216545	Hs.631150	NR_024586		KMT2E-AS1	-	KMT2E antisense RNA 1 (head to head)	ncRNA	KMT2E-AS1
Yap_catlast-only89i_peak_9086	chr14	79483226	79483645	+	233	NA	intron (NM_001330195, intron 15 of 20)	intron (NM_001330195, intron 15 of 20)	-182890	NR_135159	105370586		NR_135159	ENSG00000258419	LOC105370586	-	uncharacterized LOC105370586	ncRNA
Yap_catlast-only89i_peak_7418	chr12	108070036	108070373	+	233	NA	Intergenic	Intergenic	-9305	NM_001317963	11137	Hs.506652	NM_007062	ENSG00000136045	PWP1	IEF-SSP-9502	PWP1 homolog, endonuclein	protein-coding
Yap_catlast-only89i_peak_20494	chr5	10192450	10192689	+	233	NA	Intergenic	Intergenic	57452	NR_047669	134145	Hs.481569	NM_199133	ENSG00000150756	FAM173B	JS-2	family with sequence similarity 173 member B	protein-coding
Yap_catlast-only89i_peak_17997	chr3	55225864	55226260	+	233	NA	Intergenic	Intergenic	-224947	NM_001304389	57408	Hs.591668	NM_020678	ENSG00000144771	LRTM1	HT017	leucine rich repeats and transmembrane domains 1	protein-coding
Yap_catlast-only89i_peak_22140	chr5	175843333	175843735	+	233	NA	promoter-TSS (NR_045724)	promoter-TSS (NR_045724)	36	NR_045724	1212	Hs.484241	NM_001834	ENSG00000175416	CLTB	LCB	clathrin light chain B	protein-coding
Yap_catlast-only89i_peak_22870	chr6	36919552	36920022	+	233	NA	intron (NM_001199159, intron 1 of 7)	AluSx1|SINE|Alu	-2422	NM_153370	221476	Hs.25391	NM_153370	ENSG00000164530	PI16	CD364|CRISP9|MSMBBP|PSPBP	peptidase inhibitor 16	protein-coding	PI16
Yap_catlast-only89i_peak_126	chr1	8686383	8686908	+	233	NA	intron (NM_012102, intron 3 of 23)	LTR19A|LTR|ERV1	-131672	NR_132752	106632271		NR_132752		SNORD128	ZL43	small nucleolar RNA, C/D box 128	snoRNA
Yap_catlast-only89i_peak_10623	chr16	66549469	66549909	+	233	NA	intron (NM_001271935, intron 6 of 7)	intron (NM_001271935, intron 6 of 7)	34039	NM_001272050	7084	Hs.512619	NM_004614	ENSG00000166548	TK2	MTDPS2|MTTK|PEOB3|SCA31	thymidine kinase 2, mitochondrial	protein-coding
Yap_catlast-only89i_peak_3797	chr10	99469113	99469467	+	232	NA	Intergenic	Intergenic	-4175	NM_031484	83742	Hs.744073	NM_031484	ENSG00000155254	MARVELD1	GB14|MARVD1|MRVLDC1|bA548K23.8	MARVEL domain containing 1	protein-coding	MARVELD1
Yap_catlast-only89i_peak_2563	chr10	644421	644906	+	232	NA	intron (NM_014974, intron 1 of 36)	intron (NM_014974, intron 1 of 36)	43055	NR_049884	100847086		NR_049884	ENSG00000263511	MIR5699	mir-5699	microRNA 5699	ncRNA	MIR5699
Yap_catlast-only89i_peak_1035	chr1	59594052	59594882	+	232	NA	Intergenic	Intergenic	18012	NR_027120	729467	Hs.662291	NR_027120	ENSG00000224609	HSD52	-	uncharacterized LOC729467	ncRNA	HSD52
Yap_catlast-only89i_peak_18665	chr3	141086999	141087414	+	232	NA	intron (NM_001080412, intron 1 of 7)	intron (NM_001080412, intron 1 of 7)	44151	NM_001080412	253461	Hs.518301	NM_152535	ENSG00000177311	ZBTB38	CIBZ|PPP1R171|ZNF921	zinc finger and BTB domain containing 38	protein-coding
Yap_catlast-only89i_peak_17576	chr3	12764895	12765299	+	231	NA	Intergenic	AluJr|SINE|Alu	35711	NM_001284407	55287	Hs.475502	NM_018306	ENSG00000088726	TMEM40	-	transmembrane protein 40	protein-coding
Yap_catlast-only89i_peak_7040	chr12	66563726	66564031	+	231	NA	promoter-TSS (NM_001282606)	promoter-TSS (NM_001282606)	-26	NM_001282609	51643	Hs.505934	NM_016056	ENSG00000155957	TMBIM4	CGI-119|GAAP|LFG4|S1R|ZPRO	transmembrane BAX inhibitor motif containing 4	protein-coding
Yap_catlast-only89i_peak_24866	chr7	83654636	83654895	+	231	NA	intron (NM_006080, intron 6 of 16)	intron (NM_006080, intron 6 of 16)	169452	NM_006080	10371	Hs.252451	NM_006080	ENSG00000075213	SEMA3A	COLL1|HH16|Hsema-I|Hsema-III|SEMA1|SEMAD|SEMAIII|SEMAL|SemD|coll-1	semaphorin 3A	protein-coding	SEMA3A
Yap_catlast-only89i_peak_16547	chr20	57585936	57586527	+	231	NA	Intergenic	Intergenic	-3922	NM_001336	1522	Hs.252549	NM_001336	ENSG00000101160	CTSZ	CTSX	cathepsin Z	protein-coding	CTSZ
Yap_catlast-only89i_peak_17263	chr22	38614642	38615060	+	231	NA	TTS (NM_001195071)	TTS (NM_001195071)	5876	NR_132774	106635525		NR_132774		SNORA92	-	small nucleolar RNA, H/ACA box 92	snoRNA
Yap_catlast-only89i_peak_17088	chr22	29999923	30000671	+	231	NA	intron (NM_181831, intron 1 of 14)	intron (NM_181831, intron 1 of 14)	752	NM_181832	4771	Hs.187898	NM_000268	ENSG00000186575	NF2	ACN|BANF|SCH	neurofibromin 2	protein-coding
Yap_catlast-only89i_peak_26206	chr8	49341136	49341481	+	231	NA	Intergenic	Intergenic	-122819	NR_105002	101929268	Hs.683934	NR_105002	ENSG00000253608	LOC101929268	-	uncharacterized LOC101929268	ncRNA	LOC101929268
Yap_catlast-only89i_peak_1850	chr1	170278836	170279304	+	231	NA	Intergenic	Intergenic	-25721	NR_026957	284688	Hs.135668	NR_026957	ENSG00000224286	LINC01142	-	long intergenic non-protein coding RNA 1142	ncRNA	LINC01142
Yap_catlast-only89i_peak_14340	chr2	44776220	44776661	+	231	NA	intron (NM_024766, intron 3 of 10)	intron (NM_024766, intron 3 of 10)	187397	NM_024766	79823	Hs.468349	NM_024766	ENSG00000143919	CAMKMT	C2orf34|CLNMT|CaM KMT|Cam|KMT	calmodulin-lysine N-methyltransferase	protein-coding	CAMKMT
Yap_catlast-only89i_peak_27883	chr9	110037175	110037551	+	231	NA	Intergenic	L2a|LINE|L2	-8154	NM_002874	5887	Hs.521640	NM_002874	ENSG00000119318	RAD23B	HHR23B|HR23B|P58	RAD23 homolog B, nucleotide excision repair protein	protein-coding	RAD23B
Yap_catlast-only89i_peak_27697	chr9	88936344	88936794	+	230	NA	intron (NM_001330718, intron 15 of 27)	AluSz|SINE|Alu	32796	NM_001330718	79670	Hs.597057	NM_024617	ENSG00000083223	ZCCHC6	PAPD6|TUT7	zinc finger CCHC-type containing 6	protein-coding
Yap_catlast-only89i_peak_12898	chr18	59268982	59269213	+	230	NA	Intergenic	AluYc|SINE|Alu	-146312	NR_103449	100996669	Hs.586981	NR_103449		LINC01544	-	long intergenic non-protein coding RNA 1544	ncRNA	LINC01544
Yap_catlast-only89i_peak_14069	chr2	19106683	19106941	+	230	NA	Intergenic	Intergenic	119914	NR_135287	400945	Hs.502854	NR_135287	ENSG00000236204	LINC01376	-	long intergenic non-protein coding RNA 1376	ncRNA
Yap_catlast-only89i_peak_14406	chr2	47649523	47650104	+	230	NA	intron (NM_000251, intron 6 of 15)	intron (NM_000251, intron 6 of 15)	19607	NM_001258281	4436	Hs.597656	NM_000251	ENSG00000095002	MSH2	COCA1|FCC1|HNPCC|HNPCC1|LCFS2	mutS homolog 2	protein-coding
Yap_catlast-only89i_peak_19675	chr4	55364802	55365232	+	230	NA	Intergenic	Intergenic	108281	NR_134657	339978		NR_134657	ENSG00000250456	LOC339978	-	uncharacterized LOC339978	ncRNA
Yap_catlast-only89i_peak_1550	chr1	115857345	115857854	+	229	NA	intron (NM_002506, intron 1 of 2)	L2a|LINE|L2	23258	NM_002506	4803	Hs.2561	NM_002506	ENSG00000134259	NGF	Beta-NGF|HSAN5|NGFB	nerve growth factor	protein-coding	NGF
Yap_catlast-only89i_peak_9874	chr15	75959023	75959520	+	229	NA	Intergenic	Intergenic	17923	NM_001318146	257364	Hs.8705	NM_153271	ENSG00000173548	SNX33	SH3PX3|SH3PXD3C|SNX30	sorting nexin 33	protein-coding
Yap_catlast-only89i_peak_10133	chr16	3070785	3071225	+	229	NA	intron (NM_016639, intron 1 of 3)	CpG	692	NM_016639	51330	Hs.355899	NM_016639	ENSG00000006327	TNFRSF12A	CD266|FN14|TWEAKR	TNF receptor superfamily member 12A	protein-coding	TNFRSF12A
Yap_catlast-only89i_peak_17045	chr22	27566358	27566957	+	229	NA	Intergenic	Intergenic	-16821	NM_001318392	105372977	Hs.743180	NM_001318392		LOC105372977	-	uncharacterized LOC105372977	protein-coding
Yap_catlast-only89i_peak_8826	chr14	65307995	65308233	+	229	NA	Intergenic	Intergenic	-18248	NM_001024858	6710	Hs.417303	NM_000347	ENSG00000070182	SPTB	EL3|HS2|HSPTB1|SPH2	spectrin beta, erythrocytic	protein-coding
Yap_catlast-only89i_peak_303	chr1	17339458	17339955	+	229	NA	Intergenic	L2|LINE|L2	-1239	NM_001141974	23400	Hs.128866	NM_022089	ENSG00000159363	ATP13A2	CLN12|HSA9947|KRPPD|PARK9	ATPase 13A2	protein-coding
Yap_catlast-only89i_peak_28365	chr9	135951295	135951673	+	229	NA	Intergenic	LTR61|LTR|ERV1	-6442	NR_001275	1057	Hs.654361	NR_001275	ENSG00000170827	CELP	CELL|cell1|cell2|cell3	carboxyl ester lipase pseudogene	pseudo	CELP
Yap_catlast-only89i_peak_4421	chr11	9634649	9635220	+	229	NA	Intergenic	Intergenic	38700	NM_001143976	7465	Hs.249441	NM_003390	ENSG00000166483	WEE1	WEE1A|WEE1hu	WEE1 G2 checkpoint kinase	protein-coding
Yap_catlast-only89i_peak_27523	chr9	71737380	71737797	+	229	NA	intron (NM_001170414, intron 1 of 21)	intron (NM_001170414, intron 1 of 21)	1408	NM_001170414	9414	Hs.50382	NM_004817	ENSG00000119139	TJP2	C9DUPq21.11|DFNA51|DUP9q21.11|PFIC4|X104|ZO2	tight junction protein 2	protein-coding
Yap_catlast-only89i_peak_24521	chr7	44774986	44775414	+	229	NA	Intergenic	L1MB8|LINE|L1	-12965	NM_001300959	83637	Hs.77978	NM_031449	ENSG00000122515	ZMIZ2	NET27|TRAFIP20|ZIMP7|hZIMP7	zinc finger MIZ-type containing 2	protein-coding
Yap_catlast-only89i_peak_6072	chr11	126862560	126863192	+	229	NA	intron (NM_032531, intron 1 of 16)	intron (NM_032531, intron 1 of 16)	-4438	NR_036126	100422918		NR_036126	ENSG00000266215	MIR3167	-	microRNA 3167	ncRNA	MIR3167
Yap_catlast-only89i_peak_5805	chr11	109418232	109418700	+	229	NA	Intergenic	Intergenic	125620	NM_207645	399947	Hs.172982	NM_207645	ENSG00000185742	C11orf87	LOH11CR1A|NEURIM1	chromosome 11 open reading frame 87	protein-coding	C11orf87
Yap_catlast-only89i_peak_3794	chr10	99447121	99447514	+	229	NA	promoter-TSS (NM_021732)	promoter-TSS (NM_021732)	-302	NM_021732	60370	Hs.23918	NM_021732	ENSG00000119986	AVPI1	PP5395|VIP32|VIT32	arginine vasopressin induced 1	protein-coding	AVPI1
Yap_catlast-only89i_peak_26927	chr8	128822324	128822878	+	229	NA	intron (NR_003367, intron 1 of 8)	intron (NR_003367, intron 1 of 8)	14393	NR_031609	100302185		NR_031609	ENSG00000249859	MIR1204	hsa-mir-1204	microRNA 1204	ncRNA	MIR1204
Yap_catlast-only89i_peak_8479	chr14	31634913	31635268	+	229	NA	intron (NM_015382, intron 10 of 42)	AluSz|SINE|Alu	41639	NM_015382	25831	Hs.708017	NM_015382	ENSG00000092148	HECTD1	EULIR	HECT domain E3 ubiquitin protein ligase 1	protein-coding	HECTD1
Yap_catlast-only89i_peak_10553	chr16	57338193	57338494	+	228	NA	Intergenic	Intergenic	-19759	NM_015993	51090	Hs.632215	NM_015993	ENSG00000102934	PLLP	PMLP|TM4SF11	plasmolipin	protein-coding	PLLP
Yap_catlast-only89i_peak_6125	chr11	130589396	130589718	+	228	NA	Intergenic	Intergenic	46706	NM_001271983	283171	Hs.376151	NM_001271983		C11orf44	-	chromosome 11 open reading frame 44	protein-coding	C11orf44
Yap_catlast-only89i_peak_7266	chr12	94179075	94179393	+	228	NA	intron (NM_001320100, intron 2 of 2)	intron (NM_001320100, intron 2 of 2)	-47635	NR_110092	101928731	Hs.659971	NR_110092	ENSG00000258274	LOC101928731	-	uncharacterized LOC101928731	ncRNA	LOC101928731
Yap_catlast-only89i_peak_10823	chr16	75278967	75279636	+	228	NA	intron (NM_001170715, intron 1 of 6)	intron (NM_001170715, intron 1 of 6)	2923	NM_001170719	9564	Hs.479747	NM_014567	ENSG00000050820	BCAR1	CAS|CAS1|CASS1|CRKAS|P130Cas	BCAR1, Cas family scaffolding protein	protein-coding
Yap_catlast-only89i_peak_1188	chr1	78354079	78354443	+	228	NA	promoter-TSS (NM_001172309)	promoter-TSS (NM_001172309)	61	NM_144573	91624	Hs.612385	NM_144573	ENSG00000162614	NEXN	CMH20|NELIN	nexilin F-actin binding protein	protein-coding	NEXN
Yap_catlast-only89i_peak_22380	chr6	10441380	10441826	+	228	NA	intron (NR_132993, intron 1 of 3)	intron (NR_132993, intron 1 of 3)	1653	NR_049872	100846998		NR_049872	ENSG00000263705	MIR5689	-	microRNA 5689	ncRNA	MIR5689
Yap_catlast-only89i_peak_12455	chr18	3623826	3624207	+	228	NA	intron (NM_001003809, intron 4 of 9)	intron (NM_001003809, intron 4 of 9)	20281	NR_119377	84777	Hs.659053	NM_032691		DLGAP1-AS2	-	DLGAP1 antisense RNA 2	ncRNA
Yap_catlast-only89i_peak_20956	chr5	55575774	55576273	+	228	NA	Intergenic	Intergenic	-46837	NM_024669	79722	Hs.436214	NM_024669	ENSG00000164512	ANKRD55	-	ankyrin repeat domain 55	protein-coding	ANKRD55
Yap_catlast-only89i_peak_13770	chr19	47552602	47552893	+	228	NA	promoter-TSS (NM_017854)	promoter-TSS (NM_017854)	-865	NM_017854	54958	Hs.105606	NM_017854	ENSG00000130748	TMEM160	-	transmembrane protein 160	protein-coding	TMEM160
Yap_catlast-only89i_peak_9141	chr14	90747450	90747881	+	228	NA	intron (NM_017970, intron 12 of 13)	AluJb|SINE|Alu	23382	NM_001330212	5700	Hs.356654	NM_002802	ENSG00000100764	PSMC1	P26S4|S4|p56	proteasome 26S subunit, ATPase 1	protein-coding
Yap_catlast-only89i_peak_20415	chr5	82316	82608	+	228	NA	Intergenic	Intergenic	-57911	NM_052909	153478	Hs.535800	NM_052909	ENSG00000153404	PLEKHG4B	-	pleckstrin homology and RhoGEF domain containing G4B	protein-coding	PLEKHG4B
Yap_catlast-only89i_peak_14104	chr2	20811110	20811614	+	228	NA	Intergenic	Intergenic	-19054	NR_046836	100874343	Hs.591546	NR_046836	ENSG00000231948	HS1BP3-IT1	-	HS1BP3 intronic transcript 1	ncRNA	HS1BP3-IT1
Yap_catlast-only89i_peak_22183	chr5	178692485	178692930	+	228	NA	intron (NM_014244, intron 3 of 21)	intron (NM_014244, intron 3 of 21)	79724	NM_021599	9509	Hs.23871	NM_014244	ENSG00000087116	ADAMTS2	ADAM-TS2|ADAMTS-2|ADAMTS-3|NPI|PC I-NP|PCI-NP|PCINP|PCPNI|PNPI	ADAM metallopeptidase with thrombospondin type 1 motif 2	protein-coding
Yap_catlast-only89i_peak_6250	chr12	5193225	5193447	+	228	NA	Intergenic	Intergenic	40251	NM_002234	3741	Hs.150208	NM_002234	ENSG00000130037	KCNA5	ATFB7|HCK1|HK2|HPCN1|KV1.5|PCN1	potassium voltage-gated channel subfamily A member 5	protein-coding	KCNA5
Yap_catlast-only89i_peak_12995	chr19	1102385	1102806	+	228	NA	Intergenic	Intergenic	-1330	NM_001039847	2879	Hs.433951	NM_002085	ENSG00000167468	GPX4	GPx-4|GSHPx-4|MCSP|PHGPx|SMDS|snGPx|snPHGPx	glutathione peroxidase 4	protein-coding
Yap_catlast-only89i_peak_3423	chr10	76053709	76054212	+	228	NA	intron (NM_006721, intron 3 of 10)	L1ME3A|LINE|L1	117713	NM_001202449	132	Hs.656586	NM_001123	ENSG00000156110	ADK	AK	adenosine kinase	protein-coding
Yap_catlast-only89i_peak_19785	chr4	77906047	77906401	+	228	NA	intron (NM_018243, intron 1 of 9)	intron (NM_018243, intron 1 of 9)	35357	NM_018243	55752	Hs.128199	NM_018243	ENSG00000138758	2018-09-11	-	septin 11	protein-coding	2018-09-11
Yap_catlast-only89i_peak_10692	chr16	68836173	68836499	+	228	NA	intron (NM_004360, intron 3 of 15)	intron (NM_004360, intron 3 of 15)	-41173	NM_024562	79613	Hs.13526	NM_024562	ENSG00000103047	TANGO6	TMCO7	transport and golgi organization 6 homolog	protein-coding	TANGO6
Yap_catlast-only89i_peak_2226	chr1	212658019	212658500	+	228	NA	Intergenic	Intergenic	52030	NM_013349	29937	Hs.461787	NM_013349	ENSG00000117691	NENF	CIR2|SCIRP10|SPUF	neudesin neurotrophic factor	protein-coding	NENF
Yap_catlast-only89i_peak_11553	chr17	25836012	25836359	+	228	NA	intron (NM_014238, intron 2 of 20)	intron (NM_014238, intron 2 of 20)	37149	NM_014238	8844	Hs.133534	NM_014238	ENSG00000141068	KSR1	KSR|RSU2	kinase suppressor of ras 1	protein-coding	KSR1
Yap_catlast-only89i_peak_26674	chr8	107869885	107870263	+	228	NA	Intergenic	Intergenic	-87602	NM_139166	137735	Hs.374668	NM_139166	ENSG00000174429	ABRA	STARS	actin binding Rho activating protein	protein-coding	ABRA
Yap_catlast-only89i_peak_26529	chr8	97596947	97597193	+	228	NA	intron (NM_002998, intron 1 of 4)	intron (NM_002998, intron 1 of 4)	-60385	NM_016134	10404	Hs.156178	NM_016134	ENSG00000104324	CPQ	LDP|PGCP	carboxypeptidase Q	protein-coding	CPQ
Yap_catlast-only89i_peak_19530	chr4	28289515	28289915	+	228	NA	Intergenic	Intergenic	-531489	NR_036237	100422937		NR_036237	ENSG00000283275	MIR4275	-	microRNA 4275	ncRNA	MIR4275
Yap_catlast-only89i_peak_27423	chr9	33506605	33506993	+	228	NA	intron (NR_003667, intron 4 of 4)	AluJb|SINE|Alu	4365	NR_003667	441394	Hs.521441	NR_003667		SUGT1P1	SGT1P|SUGT1P|bA255A11.1	SGT1 homolog, MIS12 kinetochore complex assembly cochaperone pseudogene 1	pseudo	SUGT1P1
Yap_catlast-only89i_peak_2286	chr1	218671969	218672245	+	228	NA	intron (NR_031644, intron 2 of 6)	intron (NR_031644, intron 2 of 6)	56139	NR_125715	103611157	Hs.133379	NR_125715	ENSG00000281453	TGFB2-OT1	-	TGFB2 overlapping transcript 1	ncRNA	TGFB2-OT1
Yap_catlast-only89i_peak_2662	chr10	13829866	13830124	+	228	NA	intron (NM_018027, intron 5 of 24)	intron (NM_018027, intron 5 of 24)	-80428	NM_001318338	55691	Hs.330463	NM_018027	ENSG00000151474	FRMD4A	CCAFCA|FRMD4|bA295P9.4	FERM domain containing 4A	protein-coding
Yap_catlast-only89i_peak_20601	chr5	17000171	17000822	+	228	NA	Intergenic	Intergenic	-64111	NM_012334	4651	Hs.481720	NM_012334	ENSG00000145555	MYO10	-	myosin X	protein-coding	MYO10
Yap_catlast-only89i_peak_10095	chr16	799022	799321	+	228	NA	Intergenic	FLAM_C|SINE|Alu	-8133	NM_001304799	64428	Hs.513247	NM_022493	ENSG00000103245	NARFL	HPRN|IOP1|LET1L|NAR1|PRN	nuclear prelamin A recognition factor like	protein-coding
Yap_catlast-only89i_peak_20982	chr5	60106589	60106861	+	228	NA	intron (NM_001297617, intron 1 of 10)	intron (NM_001297617, intron 1 of 10)	33376	NM_024930	79993	Hs.274256	NM_024930	ENSG00000164181	ELOVL7	-	ELOVL fatty acid elongase 7	protein-coding	ELOVL7
Yap_catlast-only89i_peak_2204	chr1	210361557	210361897	+	228	NA	Intergenic	HERVH-int|LTR|ERV1	-44468	NM_019605	56256	Hs.600545	NM_019605	ENSG00000082497	SERTAD4	DJ667H12.2	SERTA domain containing 4	protein-coding	SERTAD4
Yap_catlast-only89i_peak_22499	chr6	16763115	16763482	+	227	NA	non-coding (NR_136240, exon 3 of 3)	non-coding (NR_136240, exon 3 of 3)	-1577	NM_000332	6310	Hs.434961	NM_000332	ENSG00000124788	ATXN1	ATX1|D6S504E|SCA1	ataxin 1	protein-coding	ATXN1
Yap_catlast-only89i_peak_4492	chr11	11938425	11938828	+	227	NA	intron (NM_001330208, intron 9 of 28)	AluJo|SINE|Alu	75656	NM_001330208	55031	Hs.577256	NM_017944	ENSG00000170242	USP47	TRFP	ubiquitin specific peptidase 47	protein-coding
Yap_catlast-only89i_peak_18417	chr3	123324060	123324385	+	227	NA	intron (NR_121654, intron 2 of 3)	Tigger13a|DNA|TcMar-Tigger	15232	NM_053031	4638	Hs.477375	NM_005965	ENSG00000065534	MYLK	AAT7|KRP|MLCK|MLCK1|MLCK108|MLCK210|MSTP083|MYLK1|smMLCK	myosin light chain kinase	protein-coding
Yap_catlast-only89i_peak_25698	chr8	13432115	13432487	+	227	NA	Intergenic	Intergenic	7949	NM_001007090	157773	Hs.104941	NM_001007090	ENSG00000164743	C8orf48	-	chromosome 8 open reading frame 48	protein-coding	C8orf48
Yap_catlast-only89i_peak_18182	chr3	86842903	86843259	+	227	NA	Intergenic	Intergenic	197192	NM_001320493	389136	Hs.606507	NM_016206	ENSG00000206538	VGLL3	VGL-3|VGL3	vestigial like family member 3	protein-coding
Yap_catlast-only89i_peak_9233	chr14	100040765	100041119	+	227	NA	intron (NM_001144995, intron 1 of 5)	intron (NM_001144995, intron 1 of 5)	29785	NM_001144995	317762	Hs.709288	NM_001144995	ENSG00000205476	CCDC85C	-	coiled-coil domain containing 85C	protein-coding	CCDC85C
Yap_catlast-only89i_peak_21187	chr5	81630665	81630975	+	227	NA	Intergenic	Intergenic	55539	NM_001017971	92270	Hs.729805	NM_001017971	ENSG00000205464	ATP6AP1L	-	ATPase H+ transporting accessory protein 1 like	protein-coding	ATP6AP1L
Yap_catlast-only89i_peak_3332	chr10	72137848	72138106	+	227	NA	intron (NM_018239, intron 1 of 3)	intron (NM_018239, intron 1 of 3)	-1442	NM_001278213	55222	Hs.7778	NM_018205	ENSG00000172731	LRRC20	-	leucine rich repeat containing 20	protein-coding
Yap_catlast-only89i_peak_8806	chr14	64584819	64585115	+	227	NA	intron (NM_182914, intron 66 of 115)	intron (NM_182914, intron 66 of 115)	-23124	NR_031677	100313830		NR_031677	ENSG00000221537	MIR548H1	MIR548H-1|MIRN548H1	microRNA 548h-1	ncRNA	MIR548H1
Yap_catlast-only89i_peak_17588	chr3	14185316	14185772	+	227	NA	TTS (NM_024334)	TTS (NM_024334)	19104	NM_024334	79188	Hs.517817	NM_024334	ENSG00000170876	TMEM43	ARVC5|ARVD5|EDMD7|LUMA	transmembrane protein 43	protein-coding	TMEM43
Yap_catlast-only89i_peak_16136	chr20	34472004	34472210	+	227	NA	intron (NM_016436, intron 9 of 17)	intron (NM_016436, intron 9 of 17)	70441	NM_033630	51282	Hs.584909	NM_016558	ENSG00000171222	SCAND1	RAZ1|SDP1	SCAN domain containing 1	protein-coding
Yap_catlast-only89i_peak_3389	chr10	74855295	74855568	+	227	NA	intron (NM_001142595, intron 1 of 15)	intron (NM_001142595, intron 1 of 15)	1301	NM_001142595	5033	Hs.500047	NM_000917	ENSG00000122884	P4HA1	P4HA	prolyl 4-hydroxylase subunit alpha 1	protein-coding
Yap_catlast-only89i_peak_3818	chr10	101098817	101099294	+	227	NA	intron (NR_144311, intron 1 of 10)	L2a|LINE|L2	10199	NM_001345889	26507	Hs.274579	NM_020348	ENSG00000119946	CNNM1	ACDP1|CLP-1	cyclin and CBS domain divalent metal cation transport mediator 1	protein-coding
Yap_catlast-only89i_peak_2485	chr1	240405911	240406551	+	226	NA	intron (NM_001305424, intron 7 of 18)	intron (NM_001305424, intron 7 of 18)	151046	NM_020066	56776	Hs.24889	NM_020066	ENSG00000155816	FMN2	-	formin 2	protein-coding	FMN2
Yap_catlast-only89i_peak_5795	chr11	108432158	108432588	+	226	NA	intron (NM_001308019, intron 2 of 6)	intron (NM_001308019, intron 2 of 6)	-9441	NM_001144763	23086	Hs.28540	NM_015065	ENSG00000110723	EXPH5	SLAC2-B|SLAC2B	exophilin 5	protein-coding
Yap_catlast-only89i_peak_1646	chr1	150164305	150164654	+	226	NA	Intergenic	Intergenic	31553	NR_135098	105371433	Hs.599366	NR_135098		LOC105371433	-	uncharacterized LOC105371433	ncRNA
Yap_catlast-only89i_peak_8805	chr14	64562333	64562590	+	226	NA	promoter-TSS (NR_031677)	promoter-TSS (NR_031677)	-618	NR_031677	100313830		NR_031677	ENSG00000221537	MIR548H1	MIR548H-1|MIRN548H1	microRNA 548h-1	ncRNA	MIR548H1
Yap_catlast-only89i_peak_20376	chr4	185321405	185322003	+	226	NA	intron (NM_002199, intron 6 of 8)	L1MD2|LINE|L1	-18244	NR_125933	102723766	Hs.432281	NR_125933	ENSG00000249096	LOC102723766	-	uncharacterized LOC102723766	ncRNA	LOC102723766
Yap_catlast-only89i_peak_12456	chr18	3624311	3624654	+	225	NA	intron (NM_001003809, intron 4 of 9)	intron (NM_001003809, intron 4 of 9)	20747	NR_119377	84777	Hs.659053	NM_032691		DLGAP1-AS2	-	DLGAP1 antisense RNA 2	ncRNA
Yap_catlast-only89i_peak_8854	chr14	67688339	67688723	+	225	NA	intron (NM_173526, intron 7 of 8)	intron (NM_173526, intron 7 of 8)	-19481	NM_001256550	64398	Hs.652312	NM_022474	ENSG00000072415	MPP5	PALS1	membrane palmitoylated protein 5	protein-coding
Yap_catlast-only89i_peak_20286	chr4	169804024	169804456	+	225	NA	intron (NM_001166110, intron 2 of 11)	AluSc|SINE|Alu	51084	NM_001166110	23022	Hs.151220	NM_016081	ENSG00000129116	PALLD	CGI-151|CGI151|MYN|PNCA1|SIH002	palladin, cytoskeletal associated protein	protein-coding
Yap_catlast-only89i_peak_23713	chr6	134910757	134911027	+	225	NA	Intergenic	Intergenic	-49749	NR_125855	101928304	Hs.555076	NR_125855		LOC101928304	-	uncharacterized LOC101928304	ncRNA	LOC101928304
Yap_catlast-only89i_peak_2496	chr1	240967900	240968145	+	225	NA	intron (NM_002924, intron 15 of 17)	intron (NM_002924, intron 15 of 17)	-192560	NM_022469	64388	Hs.98206	NM_022469	ENSG00000180875	GREM2	CKTSF1B2|DAND3|PRDC	gremlin 2, DAN family BMP antagonist	protein-coding	GREM2
Yap_catlast-only89i_peak_28396	chr9	139466494	139466915	+	225	NA	Intergenic	Intergenic	24410	NR_121577	101928483	Hs.170035	NR_121577		NALT1	LINC01573|MIR4674HG|NALT	NOTCH1 associated lncRNA in T-cell acute lymphoblastic leukemia 1	ncRNA
Yap_catlast-only89i_peak_11807	chr17	40819529	40819855	+	225	NA	TTS (NR_073574)	TTS (NR_073574)	8416	NR_073574	79990	Hs.632251	NM_024927	ENSG00000068137	PLEKHH3	-	pleckstrin homology, MyTH4 and FERM domain containing H3	protein-coding
Yap_catlast-only89i_peak_9594	chr15	58761907	58762532	+	225	NA	intron (NR_120338, intron 2 of 2)	AluJb|SINE|Alu	28715	NR_120338	101928694	Hs.655781	NR_120338	ENSG00000259293	LIPC-AS1	-	LIPC antisense RNA 1	ncRNA
Yap_catlast-only89i_peak_23225	chr6	74275916	74276089	+	225	NA	Intergenic	Intergenic	-45247	NM_001402	1915	Hs.535192	NM_001402	ENSG00000156508	EEF1A1	CCS-3|CCS3|EE1A1|EEF-1|EEF1A|EF-Tu|EF1A|GRAF-1EF|HNGC:16303|LENG7|PTI1|eEF1A-1	eukaryotic translation elongation factor 1 alpha 1	protein-coding	EEF1A1
Yap_catlast-only89i_peak_15484	chr2	220908376	220908908	+	225	NA	Intergenic	MER58B|DNA|hAT-Charlie	-137356	NR_036228	100422959		NR_036228	ENSG00000266518	MIR4268	-	microRNA 4268	ncRNA	MIR4268
Yap_catlast-only89i_peak_1090	chr1	65199182	65199584	+	225	NA	Intergenic	ERV3-16A3_I-int|LTR|ERVL	-11395	NM_018211	55225	Hs.591443	NM_018211	ENSG00000162437	RAVER2	-	ribonucleoprotein, PTB binding 2	protein-coding	RAVER2
Yap_catlast-only89i_peak_22086	chr5	172329642	172330275	+	225	NA	intron (NM_001031711, intron 3 of 9)	intron (NM_001031711, intron 3 of 9)	-55774	NM_001317981	51121	Hs.546390	NM_016093	ENSG00000037241	RPL26L1	RPL26P1	ribosomal protein L26 like 1	protein-coding
Yap_catlast-only89i_peak_19473	chr4	18884133	18884584	+	225	NA	Intergenic	L2c|LINE|L2	-860860	NM_153686	254251	Hs.446201	NM_153686	ENSG00000178177	LCORL	MLR1	ligand dependent nuclear receptor corepressor like	protein-coding	LCORL
Yap_catlast-only89i_peak_20193	chr4	152020525	152020850	+	225	NA	promoter-TSS (NM_001006)	promoter-TSS (NM_001006)	-38	NM_001006	6189	Hs.356572	NM_001006	ENSG00000145425	RPS3A	FTE1|MFTL|S3A	ribosomal protein S3A	protein-coding	RPS3A
Yap_catlast-only89i_peak_11171	chr17	1994436	1994730	+	225	NA	intron (NM_017575, intron 13 of 18)	intron (NM_017575, intron 13 of 18)	-2528	NM_001282326	23293	Hs.448342	NM_017575	ENSG00000070366	SMG6	C17orf31|EST1A|SMG-6|hSMG5/7a	SMG6, nonsense mediated mRNA decay factor	protein-coding
Yap_catlast-only89i_peak_21791	chr5	148293665	148294024	+	225	NA	Intergenic	Intergenic	87688	NM_000024	154	Hs.2551	NM_000024	ENSG00000169252	ADRB2	ADRB2R|ADRBR|B2AR|BAR|BETA2AR	adrenoceptor beta 2	protein-coding	ADRB2
Yap_catlast-only89i_peak_12010	chr17	54833448	54833824	+	225	NA	Intergenic	AluSc|SINE|Alu	77620	NM_001085430	339210	Hs.658949	NM_001085430	ENSG00000214226	C17orf67	-	chromosome 17 open reading frame 67	protein-coding	C17orf67
Yap_catlast-only89i_peak_11836	chr17	41656954	41657410	+	225	NA	Intergenic	Intergenic	-33382	NM_001079675	2118	Hs.434059	NM_001986	ENSG00000175832	ETV4	E1A-F|E1AF|PEA3|PEAS3	ETS variant 4	protein-coding
Yap_catlast-only89i_peak_17409	chr22	46084555	46085023	+	225	NA	intron (NM_001167621, intron 1 of 10)	MamRep137|DNA|TcMar?	17111	NM_013236	25814	Hs.475125	NM_013236	ENSG00000130638	ATXN10	E46L|HUMEEP|SCA10	ataxin 10	protein-coding	ATXN10
Yap_catlast-only89i_peak_23631	chr6	125980185	125980511	+	225	NA	Intergenic	Intergenic	-15151	NR_038906	643623	Hs.520367	NR_038906	ENSG00000224506	LOC643623	-	uncharacterized LOC643623	ncRNA	LOC643623
Yap_catlast-only89i_peak_22533	chr6	18307297	18307723	+	224	NA	Intergenic	Intergenic	-42711	NM_001134709	7913	Hs.484813	NM_003472	ENSG00000124795	DEK	D6S231E	DEK proto-oncogene	protein-coding
Yap_catlast-only89i_peak_13715	chr19	45959028	45959417	+	224	NA	Intergenic	Intergenic	-12031	NM_001114171	2354	Hs.590958	NM_006732	ENSG00000125740	FOSB	AP-1|G0S3|GOS3|GOSB	FosB proto-oncogene, AP-1 transcription factor subunit	protein-coding
Yap_catlast-only89i_peak_23083	chr6	52288757	52289287	+	224	NA	intron (NR_033327, intron 2 of 9)	intron (NR_033327, intron 2 of 9)	3217	NM_001172420	114327	Hs.403171	NM_018100	ENSG00000096093	EFHC1	EJM1|dJ304B14.2	EF-hand domain containing 1	protein-coding
Yap_catlast-only89i_peak_6137	chr11	130767079	130767558	+	224	NA	intron (NR_144939, intron 9 of 11)	intron (NR_144939, intron 9 of 11)	19064	NM_001347919	399979	Hs.444024	NM_014758	ENSG00000120451	SNX19	CHET8	sorting nexin 19	protein-coding
Yap_catlast-only89i_peak_5441	chr11	74077516	74077914	+	224	NA	intron (NM_173582, intron 5 of 13)	L2a|LINE|L2	31795	NM_173582	283209	Hs.26612	NM_173582	ENSG00000165434	PGM2L1	BM32A|PMMLP	phosphoglucomutase 2 like 1	protein-coding	PGM2L1
Yap_catlast-only89i_peak_25597	chr7	158611108	158611672	+	224	NA	intron (NM_020728, intron 1 of 21)	intron (NM_020728, intron 1 of 21)	10929	NM_020728	57488	Hs.490795	NM_020728	ENSG00000117868	ESYT2	CHR2SYT|E-Syt2|FAM62B	extended synaptotagmin 2	protein-coding	ESYT2
Yap_catlast-only89i_peak_12406	chr17	81066671	81067140	+	224	NA	Intergenic	Intergenic	29338	NM_001004431	284207	Hs.378821	NM_001004431	ENSG00000176845	METRNL	-	meteorin like, glial cell differentiation regulator	protein-coding	METRNL
Yap_catlast-only89i_peak_9421	chr15	39483967	39484264	+	223	NA	Intergenic	Intergenic	-58755	NR_144507	400360	Hs.376109	NM_207445		C15orf54	-	chromosome 15 open reading frame 54	ncRNA
Yap_catlast-only89i_peak_24859	chr7	82192271	82192848	+	223	NA	Intergenic	Intergenic	-119437	NM_001302890	781	Hs.282151	NM_000722	ENSG00000153956	CACNA2D1	CACNA2|CACNL2A|CCHL2A|LINC01112|lncRNA-N3	calcium voltage-gated channel auxiliary subunit alpha2delta 1	protein-coding
Yap_catlast-only89i_peak_18423	chr3	123443088	123443533	+	223	NA	intron (NM_053027, intron 12 of 32)	intron (NM_053027, intron 12 of 32)	34819	NR_046629	100873940	Hs.667316	NR_046629	ENSG00000250174	MYLK-AS2	-	MYLK antisense RNA 2	ncRNA	MYLK-AS2
Yap_catlast-only89i_peak_7991	chr13	43819467	43819830	+	223	NA	intron (NM_017993, intron 14 of 16)	intron (NM_017993, intron 14 of 16)	132347	NR_047013	100874159	Hs.633241	NR_047013		LINC00400	-	long intergenic non-protein coding RNA 400	ncRNA	LINC00400
Yap_catlast-only89i_peak_546	chr1	27823101	27823639	+	223	NA	Intergenic	(TC)n|Simple_repeat|Simple_repeat	-6672	NM_001201404	10163	Hs.469244	NM_006990	ENSG00000158195	WASF2	IMD2|SCAR2|WASF4|WAVE2|dJ393P12.2	WAS protein family member 2	protein-coding
Yap_catlast-only89i_peak_18978	chr3	171529770	171530156	+	223	NA	Intergenic	AluSx1|SINE|Alu	-1679	NM_002662	5337	Hs.382865	NM_002662	ENSG00000075651	PLD1	-	phospholipase D1	protein-coding	PLD1
Yap_catlast-only89i_peak_23541	chr6	113198582	113198911	+	223	NA	Intergenic	Intergenic	530214	NM_001013734	442247	Hs.448264	NM_001013734	ENSG00000251258	RFPL4B	RNF211	ret finger protein like 4B	protein-coding	RFPL4B
Yap_catlast-only89i_peak_23716	chr6	135230263	135230658	+	223	NA	Intergenic	Intergenic	40800	NM_170771	64577	Hs.486520	NM_022568	ENSG00000118514	ALDH8A1	ALDH12|DJ352A20.2	aldehyde dehydrogenase 8 family member A1	protein-coding
Yap_catlast-only89i_peak_7469	chr12	110476803	110477357	+	223	NA	3' UTR (NM_033121, exon 15 of 15)	3' UTR (NM_033121, exon 15 of 15)	28420	NM_207435	400073	Hs.44817	NM_207435	ENSG00000174456	C12orf76	-	chromosome 12 open reading frame 76	protein-coding	C12orf76
Yap_catlast-only89i_peak_18388	chr3	119863193	119863540	+	223	NA	Intergenic	Intergenic	-50102	NM_002093	2932	Hs.445733	NM_002093	ENSG00000082701	GSK3B	-	glycogen synthase kinase 3 beta	protein-coding	GSK3B
Yap_catlast-only89i_peak_21770	chr5	145304976	145305285	+	223	NA	Intergenic	Intergenic	-10996	NM_152550	153769	Hs.443728	NM_152550	ENSG00000156463	SH3RF2	HEPP1|POSHER|PPP1R39|RNF158	SH3 domain containing ring finger 2	protein-coding	SH3RF2
Yap_catlast-only89i_peak_23809	chr6	145218737	145219047	+	223	NA	Intergenic	MIRb|SINE|MIR	492101	NR_132778	106635530		NR_132778		SNORA98	-	small nucleolar RNA, H/ACA box 98	snoRNA
Yap_catlast-only89i_peak_21748	chr5	142915921	142916433	+	222	NA	Intergenic	Intergenic	-101100	NM_001018075	2908	Hs.122926	NM_000176	ENSG00000113580	NR3C1	GCCR|GCR|GCRST|GR|GRL	nuclear receptor subfamily 3 group C member 1	protein-coding
Yap_catlast-only89i_peak_18343	chr3	112372451	112372760	+	222	NA	Intergenic	Intergenic	-12615	NM_199511	151887	Hs.477128	NM_199511	ENSG00000091986	CCDC80	DRO1|SSG1|URB|okuribin	coiled-coil domain containing 80	protein-coding	CCDC80
Yap_catlast-only89i_peak_4581	chr11	16813136	16813682	+	222	NA	intron (NM_001329631, intron 19 of 22)	intron (NM_001329631, intron 19 of 22)	53261	NM_014267	10944	Hs.368226	NM_014267	ENSG00000110696	C11orf58	IMAGE145052|SMAP	chromosome 11 open reading frame 58	protein-coding	C11orf58
Yap_catlast-only89i_peak_7895	chr13	32341253	32341710	+	222	NA	intron (NM_001166058, intron 5 of 16)	intron (NM_001166058, intron 5 of 16)	27802	NM_001166058	122042	Hs.680763	NM_130806	ENSG00000133105	RXFP2	GPR106|GREAT|INSL3R|LGR8|LGR8.1|RXFPR2	relaxin/insulin like family peptide receptor 2	protein-coding
Yap_catlast-only89i_peak_469	chr1	25039797	25040035	+	222	NA	Intergenic	Intergenic	-31844	NM_013943	25932	Hs.440544	NM_013943	ENSG00000169504	CLIC4	CLIC4L|H1|MTCLIC|huH1|p64H1	chloride intracellular channel 4	protein-coding	CLIC4
Yap_catlast-only89i_peak_24254	chr7	22770895	22771205	+	222	NA	exon (NM_001318095, exon 4 of 4)	exon (NM_001318095, exon 4 of 4)	-3811	NR_131935	541472	Hs.512234	NR_131935	ENSG00000179428	LOC541472	-	uncharacterized LOC541472	ncRNA	LOC541472
Yap_catlast-only89i_peak_10523	chr16	54496373	54496748	+	222	NA	Intergenic	L1MC3|LINE|L1	-91949	NR_134923	100996345	Hs.112680	NR_134922	ENSG00000261803	LINC02140	-	long intergenic non-protein coding RNA 2140	ncRNA
Yap_catlast-only89i_peak_16286	chr20	43359148	43359483	+	222	NA	intron (NR_132377, intron 3 of 4)	LTR3B_|LTR|ERVK	-15173	NM_022358	60598	Hs.528664	NM_022358	ENSG00000124249	KCNK15	K2p15.1|KCNK11|KCNK14|KT3.3|TASK-5|TASK5|dJ781B1.1	potassium two pore domain channel subfamily K member 15	protein-coding	KCNK15
Yap_catlast-only89i_peak_1141	chr1	68213376	68213672	+	222	NA	intron (NM_018841, intron 2 of 3)	intron (NM_018841, intron 2 of 3)	62664	NM_001924	1647	Hs.80409	NM_001924	ENSG00000116717	GADD45A	DDIT1|GADD45	growth arrest and DNA damage inducible alpha	protein-coding	GADD45A
Yap_catlast-only89i_peak_26965	chr8	129895605	129895840	+	221	NA	Intergenic	L2b|LINE|L2	-318797	NR_121672	101927774	Hs.628730	NR_121672		LINC00824	LINC01263	long intergenic non-protein coding RNA 824	ncRNA	LINC00824
Yap_catlast-only89i_peak_20655	chr5	31993389	31993834	+	221	NA	intron (NM_178140, intron 3 of 24)	intron (NM_178140, intron 3 of 24)	-57346	NR_036241	100422874		NR_036241	ENSG00000266243	MIR4279	-	microRNA 4279	ncRNA	MIR4279
Yap_catlast-only89i_peak_5386	chr11	71989851	71990388	+	221	NA	Intergenic	L1MB3|LINE|L1	-34899	NM_005169	401	Hs.731115	NM_005169	ENSG00000165462	PHOX2A	ARIX|CFEOM2|FEOM2|NCAM2|PMX2A	paired like homeobox 2a	protein-coding	PHOX2A
Yap_catlast-only89i_peak_14923	chr2	145764812	145765232	+	221	NA	intron (NR_033870, intron 3 of 4)	intron (NR_033870, intron 3 of 4)	339488	NR_033870	401014	Hs.742290	NR_033870	ENSG00000226674	TEX41	DKFZp686O1327|LINC00953	testis expressed 41 (non-protein coding)	ncRNA	TEX41
Yap_catlast-only89i_peak_1899	chr1	178236609	178237167	+	221	NA	intron (NM_170692, intron 1 of 17)	AluSc8|SINE|Alu	-73718	NM_004841	9462	Hs.496139	NM_004841	ENSG00000075391	RASAL2	NGAP	RAS protein activator like 2	protein-coding	RASAL2
Yap_catlast-only89i_peak_23056	chr6	45488061	45488450	+	221	NA	intron (NM_001015051, intron 7 of 7)	intron (NM_001015051, intron 7 of 7)	97941	NM_001278478	860	Hs.535845	NM_004348	ENSG00000124813	RUNX2	AML3|CBF-alpha-1|CBFA1|CCD|CCD1|CLCD|OSF-2|OSF2|PEA2aA|PEBP2aA	runt related transcription factor 2	protein-coding
Yap_catlast-only89i_peak_25131	chr7	106358627	106359165	+	221	NA	Intergenic	Intergenic	-57262	NM_175884	168455	Hs.29692	NM_175884	ENSG00000253276	CCDC71L	C7orf74	coiled-coil domain containing 71-like	protein-coding	CCDC71L
Yap_catlast-only89i_peak_8617	chr14	52006151	52006710	+	221	NA	intron (NM_001042481, intron 1 of 14)	intron (NM_001042481, intron 1 of 14)	50591	NM_001042481	122786	Hs.434914	NM_152330	ENSG00000139926	FRMD6	C14orf31|EX1|Willin|c14_5320	FERM domain containing 6	protein-coding
Yap_catlast-only89i_peak_16666	chr21	30009296	30009951	+	221	NA	Intergenic	Intergenic	97983	NR_026552	118421	Hs.438549	NR_026552	ENSG00000226935	LINC00161	C21orf100|NCRNA00161	long intergenic non-protein coding RNA 161	ncRNA	LINC00161
Yap_catlast-only89i_peak_2511	chr1	243447789	243448164	+	221	NA	intron (NM_006642, intron 4 of 17)	L1MC2|LINE|L1	28669	NM_006642	10806	Hs.591530	NM_006642	ENSG00000054282	SDCCAG8	BBS16|CCCAP|CCCAP SLSN7|HSPC085|NPHP10|NY-CO-8|SLSN7|hCCCAP	serologically defined colon cancer antigen 8	protein-coding	SDCCAG8
Yap_catlast-only89i_peak_28046	chr9	117929334	117929872	+	221	NA	intron (NM_017418, intron 1 of 7)	L2c|LINE|L2	25506	NM_017418	50514	Hs.148841	NM_017418	ENSG00000173077	2018-12-01	CTS9	deleted in esophageal cancer 1	protein-coding	2018-12-01
Yap_catlast-only89i_peak_23791	chr6	143497823	143498130	+	221	NA	intron (NM_001286587, intron 4 of 6)	L1PB1|LINE|L1	115997	NM_016108	51390	Hs.567501	NM_016108	ENSG00000146416	AIG1	AIG-1|dJ95L4.1	androgen induced 1	protein-coding	AIG1
Yap_catlast-only89i_peak_4169	chr10	126595109	126595714	+	221	NA	Intergenic	Intergenic	-35281	NM_017580	54764	Hs.595158	NM_017580	ENSG00000019995	ZRANB1	TRABID	zinc finger RANBP2-type containing 1	protein-coding	ZRANB1
Yap_catlast-only89i_peak_4905	chr11	47210806	47211203	+	221	NA	Intergenic	L2c|LINE|L2	-2994	NM_001184974	29763	Hs.334639	NM_016223	ENSG00000165912	PACSIN3	SDPIII	protein kinase C and casein kinase substrate in neurons 3	protein-coding
Yap_catlast-only89i_peak_21721	chr5	142000879	142001135	+	220	NA	promoter-TSS (NM_001144892)	promoter-TSS (NM_001144892)	-87	NM_001144892	2246	Hs.483635	NM_000800	ENSG00000113578	FGF1	AFGF|ECGF|ECGF-beta|ECGFA|ECGFB|FGF-1|FGF-alpha|FGFA|GLIO703|HBGF-1|HBGF1	fibroblast growth factor 1	protein-coding
Yap_catlast-only89i_peak_19033	chr3	177837341	177837826	+	220	NA	Intergenic	AluSc|SINE|Alu	-299406	NR_046786	100874330	Hs.201902	NR_046786	ENSG00000223941	LINC01014	KCNMB2-IT1	long intergenic non-protein coding RNA 1014	ncRNA	LINC01014
Yap_catlast-only89i_peak_4542	chr11	12791360	12791963	+	220	NA	intron (NM_021961, intron 3 of 12)	intron (NM_021961, intron 3 of 12)	95692	NM_021961	7003	Hs.655331	NM_021961	ENSG00000187079	TEAD1	AA|NTEF-1|REF1|TCF-13|TCF13|TEAD-1|TEF-1	TEA domain transcription factor 1	protein-coding	TEAD1
Yap_catlast-only89i_peak_21181	chr5	81051248	81051486	+	220	NA	Intergenic	Intergenic	-4295	NM_001345886	23635	Hs.102735	NM_012446	ENSG00000145687	SSBP2	HSPC116|SOSS-B2	single stranded DNA binding protein 2	protein-coding
Yap_catlast-only89i_peak_16110	chr20	33908179	33908592	+	220	NA	intron (NM_001184977, intron 5 of 7)	intron (NM_001184977, intron 5 of 7)	-28160	NM_178468	128876	Hs.592149	NM_178468	ENSG00000125998	FAM83C	C20orf128|dJ614O4.7	family with sequence similarity 83 member C	protein-coding	FAM83C
Yap_catlast-only89i_peak_26972	chr8	130697825	130698296	+	220	NA	Intergenic	Intergenic	-5575	NR_130917	137196	Hs.679457	NR_130917	ENSG00000229140	CCDC26	RAM	CCDC26 long non-coding RNA	ncRNA	CCDC26
Yap_catlast-only89i_peak_10881	chr16	82687569	82687941	+	220	NA	intron (NM_001220488, intron 2 of 14)	intron (NM_001220488, intron 2 of 14)	27356	NM_001257	1012	Hs.654386	NM_001257	ENSG00000140945	CDH13	CDHH|P105	cadherin 13	protein-coding	CDH13
Yap_catlast-only89i_peak_9334	chr14	105490868	105491561	+	220	NA	Intergenic	MLT1H|LTR|ERVL-MaLR	-3789	NM_017955	55038	Hs.34045	NM_017955	ENSG00000170779	CDCA4	HEPP|SEI-3/HEPP	cell division cycle associated 4	protein-coding	CDCA4
Yap_catlast-only89i_peak_18899	chr3	159572400	159572941	+	219	NA	intron (NM_001197109, intron 1 of 6)	intron (NM_001197109, intron 1 of 6)	15020	NM_001197109	29970	Hs.134665	NM_014575	ENSG00000151967	SCHIP1	SCHIP-1	schwannomin interacting protein 1	protein-coding
Yap_catlast-only89i_peak_1400	chr1	98789358	98789888	+	219	NA	Intergenic	MLT2F|LTR|ERVL	113356	NR_046088	729987	Hs.683961	NR_046088	ENSG00000226053	LINC01776	-	long intergenic non-protein coding RNA 1776	ncRNA
Yap_catlast-only89i_peak_11918	chr17	46253329	46253675	+	219	NA	intron (NM_001075099, intron 9 of 12)	intron (NM_001075099, intron 9 of 12)	-19629	NR_031607	100302211		NR_031607	ENSG00000221739	MIR1203	MIRN1203|hsa-mir-1203	microRNA 1203	ncRNA	MIR1203
Yap_catlast-only89i_peak_6855	chr12	54822141	54822691	+	219	NA	intron (NR_120487, intron 3 of 3)	intron (NR_120487, intron 3 of 3)	8847	NR_120488	102724050	Hs.670941	NR_120486	ENSG00000258137	LOC102724050	-	uncharacterized LOC102724050	ncRNA
Yap_catlast-only89i_peak_7776	chr13	21571805	21572345	+	219	NA	intron (NM_014572, intron 2 of 7)	intron (NM_014572, intron 2 of 7)	-48508	NR_104058	101930748	Hs.637638	NR_104058	ENSG00000233780	LINC00367	-	long intergenic non-protein coding RNA 367	ncRNA	LINC00367
Yap_catlast-only89i_peak_616	chr1	31869968	31870919	+	219	NA	Intergenic	Intergenic	-11969	NM_001199038	347735	Hs.270655	NM_018565	ENSG00000168528	SERINC2	FKSG84|PRO0899|TDE2|TDE2L	serine incorporator 2	protein-coding
Yap_catlast-only89i_peak_25670	chr8	12584008	12584432	+	219	NA	promoter-TSS (NR_037495)	promoter-TSS (NR_037495)	-526	NR_037495	100500838		NR_037495	ENSG00000283523	MIR3926-2	mir-3926-2	microRNA 3926-2	ncRNA	MIR3926-2
Yap_catlast-only89i_peak_28830	chrX	107707895	107708129	+	219	NA	intron (NM_000495, intron 1 of 50)	intron (NM_000495, intron 1 of 50)	24938	NM_033380	1287	Hs.369089	NM_000495	ENSG00000188153	COL4A5	ASLN|ATS|CA54	collagen type IV alpha 5 chain	protein-coding
Yap_catlast-only89i_peak_17067	chr22	28512530	28512784	+	219	NA	intron (NM_001145418, intron 6 of 22)	intron (NM_001145418, intron 6 of 22)	-196057	NR_036169	100423034		NR_036169	ENSG00000264073	MIR3199-1	mir-3199-1	microRNA 3199-1	ncRNA	MIR3199-1
Yap_catlast-only89i_peak_1268	chr1	88382699	88383003	+	219	NA	Intergenic	Intergenic	-545513	NR_038324	100505768	Hs.125247	NR_038324	ENSG00000227290	LINC01364	-	long intergenic non-protein coding RNA 1364	ncRNA	LINC01364
Yap_catlast-only89i_peak_24458	chr7	40847916	40848558	+	219	NA	intron (NM_024728, intron 14 of 14)	intron (NM_024728, intron 14 of 14)	171300	NR_110831	101928744	Hs.639767	NR_110831	ENSG00000232458	LINC01450	-	long intergenic non-protein coding RNA 1450	ncRNA	LINC01450
Yap_catlast-only89i_peak_23734	chr6	138049819	138050199	+	219	NA	Intergenic	Intergenic	10165	NR_121618	100507406	Hs.556703	NR_121618	ENSG00000234956	LOC100507406	-	uncharacterized LOC100507406	ncRNA	LOC100507406
Yap_catlast-only89i_peak_3476	chr10	79175954	79176757	+	219	NA	intron (NM_001322832, intron 1 of 27)	intron (NM_001322832, intron 1 of 27)	65725	NR_126365	101929286	Hs.568867	NR_126365		KCNMA1-AS3	-	KCNMA1 antisense RNA 3	ncRNA	KCNMA1-AS3
Yap_catlast-only89i_peak_5313	chr11	68658343	68658810	+	219	NA	TTS (NM_181514)	TTS (NM_181514)	12727	NM_181514	219927	Hs.503047	NM_181512	ENSG00000197345	MRPL21	L21mt|MRP-L21	mitochondrial ribosomal protein L21	protein-coding
Yap_catlast-only89i_peak_21084	chr5	72617649	72617897	+	219	NA	Intergenic	Intergenic	-119985	NR_134291	340090	Hs.434311	NR_134291		LOC340090	-	uncharacterized LOC340090	ncRNA
Yap_catlast-only89i_peak_16188	chr20	36738342	36738909	+	219	NA	Intergenic	Intergenic	55206	NM_004613	7052	Hs.517033	NM_004613	ENSG00000198959	TGM2	TG(C)|TGC	transglutaminase 2	protein-coding	TGM2
Yap_catlast-only89i_peak_20127	chr4	142167452	142167671	+	219	NA	Intergenic	Intergenic	25520	NM_001292002	27309	Hs.120766	NM_014487	ENSG00000109445	ZNF330	HSA6591|NOA36	zinc finger protein 330	protein-coding
Yap_catlast-only89i_peak_21202	chr5	83220957	83221346	+	219	NA	Intergenic	Intergenic	-204255	NM_001884	1404	Hs.2799	NM_001884	ENSG00000145681	HAPLN1	CRT1|CRTL1	hyaluronan and proteoglycan link protein 1	protein-coding	HAPLN1
Yap_catlast-only89i_peak_15815	chr20	8447500	8447774	+	219	NA	intron (NM_182734, intron 3 of 32)	AluSz|SINE|Alu	218286	NR_046809	100874337	Hs.662218	NR_046809		PLCB1-IT1	-	PLCB1 intronic transcript 1	ncRNA
Yap_catlast-only89i_peak_13797	chr19	48102168	48102687	+	219	NA	Intergenic	Intergenic	-9026	NM_015711	29998	Hs.97244	NM_015711	ENSG00000063169	GLTSCR1	-	glioma tumor suppressor candidate region gene 1	protein-coding	GLTSCR1
Yap_catlast-only89i_peak_7742	chr12	131310828	131311347	+	219	NA	intron (NM_001980, intron 2 of 9)	intron (NM_001980, intron 2 of 9)	12732	NM_194356	2054	Hs.437585	NM_001980	ENSG00000111450	STX2	EPIM|EPM|STX2A|STX2B|STX2C	syntaxin 2	protein-coding
Yap_catlast-only89i_peak_2070	chr1	201472620	201472958	+	219	NA	intron (NM_001193570, intron 1 of 5)	intron (NM_001193570, intron 1 of 5)	3178	NM_001193571	1465	Hs.108080	NM_004078	ENSG00000159176	CSRP1	CRP|CRP1|CSRP|CYRP|D1S181E|HEL-141|HEL-S-286	cysteine and glycine rich protein 1	protein-coding
Yap_catlast-only89i_peak_22965	chr6	42283742	42284386	+	219	NA	intron (NM_033502, intron 3 of 17)	intron (NM_033502, intron 3 of 17)	-98431	NM_018141	55173	Hs.380887	NM_018141	ENSG00000048544	MRPS10	MRP-S10|PNAS-122	mitochondrial ribosomal protein S10	protein-coding	MRPS10
Yap_catlast-only89i_peak_9106	chr14	85906385	85906691	+	219	NA	Intergenic	Intergenic	46279	NR_102738	100996280	Hs.135735	NR_102737	ENSG00000259107	LINC00911	-	long intergenic non-protein coding RNA 911	ncRNA
Yap_catlast-only89i_peak_18345	chr3	112390730	112391183	+	219	NA	Intergenic	L2b|LINE|L2	-30966	NM_199511	151887	Hs.477128	NM_199511	ENSG00000091986	CCDC80	DRO1|SSG1|URB|okuribin	coiled-coil domain containing 80	protein-coding	CCDC80
Yap_catlast-only89i_peak_19041	chr3	178563501	178563960	+	219	NA	intron (NR_126561, intron 2 of 5)	intron (NR_126561, intron 2 of 5)	14463	NR_126560	104797538	Hs.478363	NR_126560		KCNMB2-AS1	-	KCNMB2 antisense RNA 1	ncRNA	KCNMB2-AS1
Yap_catlast-only89i_peak_18493	chr3	127814040	127814537	+	219	NA	intron (NM_003707, intron 8 of 10)	intron (NM_003707, intron 8 of 10)	19635	NR_046645	100874089	Hs.581603	NR_046645	ENSG00000239608	RUVBL1-AS1	-	RUVBL1 antisense RNA 1	ncRNA	RUVBL1-AS1
Yap_catlast-only89i_peak_12210	chr17	70335133	70335951	+	219	NA	Intergenic	Intergenic	-3410	NR_135222	146795	Hs.651743	NR_135222	ENSG00000264026	LINC02003	-	long intergenic non-protein coding RNA 2003	ncRNA
Yap_catlast-only89i_peak_26802	chr8	122176344	122176622	+	219	NA	Intergenic	Intergenic	-352174	NM_021021	6641	Hs.46701	NM_021021	ENSG00000172164	SNTB1	59-DAP|A1B|BSYN2|DAPA1B|SNT2|SNT2B1|TIP-43	syntrophin beta 1	protein-coding	SNTB1
Yap_catlast-only89i_peak_18426	chr3	123469552	123469869	+	219	NA	intron (NM_001321309, intron 4 of 32)	intron (NM_001321309, intron 4 of 32)	61219	NR_046629	100873940	Hs.667316	NR_046629	ENSG00000250174	MYLK-AS2	-	MYLK antisense RNA 2	ncRNA	MYLK-AS2
Yap_catlast-only89i_peak_10739	chr16	70607579	70608046	+	219	NA	3' UTR (NM_012426, exon 26 of 26)	3' UTR (NM_012426, exon 26 of 26)	-5986	NM_001172771	146433	Hs.461214	NM_152456	ENSG00000157368	IL34	C16orf77|IL-34	interleukin 34	protein-coding
Yap_catlast-only89i_peak_6105	chr11	129731744	129732077	+	219	NA	Intergenic	Intergenic	30994	NM_006165	4798	Hs.530539	NM_006165	ENSG00000170322	NFRKB	INO80G	nuclear factor related to kappaB binding protein	protein-coding	NFRKB
Yap_catlast-only89i_peak_12346	chr17	78228569	78229007	+	219	NA	Intergenic	L1M5|LINE|L1	-5872	NM_001256071	57674	Hs.195642	NM_020914	ENSG00000173821	RNF213	ALO17|C17orf27|KIAA1618|MYMY2|MYSTR|NET57	ring finger protein 213	protein-coding
Yap_catlast-only89i_peak_21801	chr5	148585596	148586049	+	219	NA	intron (NM_014945, intron 5 of 23)	intron (NM_014945, intron 5 of 23)	64812	NM_001345860	22885	Hs.49688	NM_014945	ENSG00000173210	ABLIM3	HMFN1661	actin binding LIM protein family member 3	protein-coding
Yap_catlast-only89i_peak_8614	chr14	51909590	51909890	+	218	NA	Intergenic	Intergenic	-46099	NM_001042481	122786	Hs.434914	NM_152330	ENSG00000139926	FRMD6	C14orf31|EX1|Willin|c14_5320	FERM domain containing 6	protein-coding
Yap_catlast-only89i_peak_16489	chr20	52228095	52228407	+	218	NA	intron (NR_134576, intron 1 of 2)	intron (NR_134576, intron 1 of 2)	3358	NR_134576	105372672	Hs.259350	NR_134576	ENSG00000235415	LOC105372672	-	uncharacterized LOC105372672	ncRNA
Yap_catlast-only89i_peak_4051	chr10	116468740	116469056	+	218	NA	intron (NM_001322885, intron 1 of 20)	Arthur1B|DNA|hAT-Tip100	-24484	NM_001003407	3983	Hs.438236	NM_002313	ENSG00000099204	ABLIM1	ABLIM|LIMAB1|LIMATIN|abLIM-1	actin binding LIM protein 1	protein-coding
Yap_catlast-only89i_peak_18872	chr3	157077901	157078308	+	218	NA	intron (NM_001167912, intron 9 of 13)	intron (NM_001167912, intron 9 of 13)	-76476	NM_002852	5806	Hs.591286	NM_002852	ENSG00000163661	PTX3	TNFAIP5|TSG-14	pentraxin 3	protein-coding	PTX3
Yap_catlast-only89i_peak_12425	chr18	2638395	2638631	+	217	NA	Intergenic	L1MC1|LINE|L1	16881	NR_033754	645158	Hs.712861	NR_033754	ENSG00000266405	CBX3P2	-	chromobox 3 pseudogene 2	pseudo	CBX3P2
Yap_catlast-only89i_peak_17062	chr22	27908341	27908622	+	217	NA	Intergenic	Intergenic	201869	NR_134581	100507657	Hs.537371	NR_134581	ENSG00000226741	LOC100507657	-	uncharacterized LOC100507657	ncRNA
Yap_catlast-only89i_peak_2691	chr10	14447047	14447599	+	217	NA	Intergenic	Intergenic	-22047	NR_036181	100422843		NR_036181	ENSG00000266321	MIR4293	-	microRNA 4293	ncRNA	MIR4293
Yap_catlast-only89i_peak_27924	chr9	112749039	112749362	+	217	NA	intron (NM_147150, intron 6 of 9)	intron (NM_147150, intron 6 of 9)	-61678	NM_001004065	11217	Hs.591908	NM_001004065	ENSG00000241978	AKAP2	AKAP-2|AKAPKL|MISP2|PRKA2	A-kinase anchoring protein 2	protein-coding	AKAP2
Yap_catlast-only89i_peak_8685	chr14	55240009	55240547	+	217	NA	intron (NM_001161577, intron 4 of 8)	intron (NM_001161577, intron 4 of 8)	18772	NM_001161577	23034	Hs.98259	NM_015589	ENSG00000020577	SAMD4A	SAMD4|SMAUG|SMAUG1|SMG|SMGA	sterile alpha motif domain containing 4A	protein-coding
Yap_catlast-only89i_peak_25891	chr8	25864723	25865029	+	217	NA	intron (NM_022659, intron 6 of 15)	intron (NM_022659, intron 6 of 15)	37764	NM_022659	64641	Hs.491292	NM_022659	ENSG00000221818	EBF2	COE2|EBF-2|O/E-3|OE-3	early B-cell factor 2	protein-coding	EBF2
Yap_catlast-only89i_peak_25413	chr7	134464042	134464395	+	217	NA	promoter-TSS (NM_004342)	promoter-TSS (NM_004342)	54	NM_033157	800	Hs.490203	NM_004342	ENSG00000122786	CALD1	CDM|H-CAD|HCAD|L-CAD|LCAD|NAG22	caldesmon 1	protein-coding
Yap_catlast-only89i_peak_9627	chr15	60694432	60695021	+	217	NA	Intergenic	L2a|LINE|L2	-4541	NM_001136015	302	Hs.511605	NM_004039	ENSG00000182718	ANXA2	ANX2|ANX2L4|CAL1H|HEL-S-270|LIP2|LPC2|LPC2D|P36|PAP-IV	annexin A2	protein-coding
Yap_catlast-only89i_peak_23996	chr7	1610935	1611373	+	217	NA	intron (NR_021487, intron 1 of 5)	MER51B|LTR|ERV1	1445	NR_021487	114796	Hs.436146	NR_021487	ENSG00000230487	PSMG3-AS1	-	PSMG3 antisense RNA 1 (head to head)	ncRNA	PSMG3-AS1
Yap_catlast-only89i_peak_10598	chr16	61832667	61833135	+	217	NA	intron (NM_001796, intron 7 of 11)	intron (NM_001796, intron 7 of 11)	237838	NM_001796	1006	Hs.368322	NM_001796	ENSG00000150394	CDH8	Nbla04261	cadherin 8	protein-coding	CDH8
Yap_catlast-only89i_peak_1842	chr1	169082868	169083309	+	217	NA	intron (NM_001677, intron 2 of 5)	intron (NM_001677, intron 2 of 5)	7141	NM_001677	481	Hs.291196	NM_001677	ENSG00000143153	ATP1B1	ATP1B	ATPase Na+/K+ transporting subunit beta 1	protein-coding	ATP1B1
Yap_catlast-only89i_peak_14291	chr2	40662104	40662422	+	216	NA	intron (NM_001112802, intron 1 of 7)	intron (NM_001112802, intron 1 of 7)	-4819	NM_001252624	6546	Hs.31961	NM_021097	ENSG00000183023	SLC8A1	NCX1	solute carrier family 8 member A1	protein-coding
Yap_catlast-only89i_peak_7689	chr12	124895943	124896388	+	216	NA	intron (NM_001077261, intron 15 of 47)	intron (NM_001077261, intron 15 of 47)	-74377	NR_106940	102466204		NR_106940	ENSG00000275967	MIR6880	hsa-mir-6880	microRNA 6880	ncRNA	MIR6880
Yap_catlast-only89i_peak_19405	chr4	9522297	9522522	+	216	NA	Intergenic	Intergenic	35528	NR_031688	100302277		NR_031688	ENSG00000221275	MIR548I2	MIR548I-2|MIRN548I2|hsa-mir-548i-2|mir-548i-2	microRNA 548i-2	ncRNA	MIR548I2
Yap_catlast-only89i_peak_19907	chr4	102288320	102288721	+	216	NA	Intergenic	L1MCa|LINE|L1	19586	NR_033874	90024	Hs.534513	NR_033874	ENSG00000254531	FLJ20021	-	uncharacterized LOC90024	ncRNA	FLJ20021
Yap_catlast-only89i_peak_26801	chr8	122029531	122029961	+	216	NA	Intergenic	Intergenic	-205437	NM_021021	6641	Hs.46701	NM_021021	ENSG00000172164	SNTB1	59-DAP|A1B|BSYN2|DAPA1B|SNT2|SNT2B1|TIP-43	syntrophin beta 1	protein-coding	SNTB1
Yap_catlast-only89i_peak_14343	chr2	45347006	45347195	+	216	NA	Intergenic	Intergenic	-110558	NM_016932	10736	Hs.101937	NM_016932	ENSG00000170577	SIX2	-	SIX homeobox 2	protein-coding	SIX2
Yap_catlast-only89i_peak_26953	chr8	129336727	129336972	+	216	NA	Intergenic	MER5A|DNA|hAT-Charlie	174487	NR_031613	100302281		NR_031613	ENSG00000221261	MIR1208	MIRN1208|hsa-mir-1208	microRNA 1208	ncRNA	MIR1208
Yap_catlast-only89i_peak_2280	chr1	218633328	218633644	+	216	NA	intron (NR_031644, intron 2 of 6)	intron (NR_031644, intron 2 of 6)	17518	NR_125715	103611157	Hs.133379	NR_125715	ENSG00000281453	TGFB2-OT1	-	TGFB2 overlapping transcript 1	ncRNA	TGFB2-OT1
Yap_catlast-only89i_peak_19226	chr3	194292976	194293378	+	216	NA	Intergenic	Intergenic	-11820	NR_047574	100507297	Hs.586059	NR_047573		TMEM44-AS1	-	TMEM44 antisense RNA 1	ncRNA
Yap_catlast-only89i_peak_18962	chr3	170520500	170520893	+	216	NA	Intergenic	MER68|LTR|ERVL	67349	NM_001320451	200916	Hs.380933	NM_001099645	ENSG00000163584	RPL22L1	-	ribosomal protein L22 like 1	protein-coding
Yap_catlast-only89i_peak_19950	chr4	113912245	113912532	+	216	NA	intron (NM_001127493, intron 2 of 46)	AluSc|SINE|Alu	-58397	NM_020977	287	Hs.620557	NM_001148	ENSG00000145362	ANK2	ANK-2|LQT4|brank-2	ankyrin 2	protein-coding
Yap_catlast-only89i_peak_12998	chr19	1177540	1178041	+	216	NA	Intergenic	Intergenic	-3508	NM_014963	22904	Hs.408708	NM_014963	ENSG00000064932	SBNO2	KIAA0963|SNO|STNO	strawberry notch homolog 2	protein-coding	SBNO2
Yap_catlast-only89i_peak_26514	chr8	97116067	97116377	+	216	NA	Intergenic	Intergenic	56798	NM_001001557	392255	Hs.492277	NM_001001557	ENSG00000156466	GDF6	BMP-13|BMP13|CDMP2|KFM|KFS|KFS1|KFSL|SGM1	growth differentiation factor 6	protein-coding	GDF6
Yap_catlast-only89i_peak_21422	chr5	119940541	119940945	+	216	NA	intron (NM_001308088, intron 1 of 3)	L1PA16|LINE|L1	73584	NM_001308088	51334	Hs.157461	NM_016644	ENSG00000184838	PRR16	DSC54|LARGEN	proline rich 16	protein-coding
Yap_catlast-only89i_peak_9172	chr14	93007015	93007361	+	216	NA	intron (NM_024832, intron 1 of 9)	MIR3|SINE|MIR	27063	NM_024832	79890	Hs.326822	NM_024832	ENSG00000100599	RIN3	-	Ras and Rab interactor 3	protein-coding	RIN3
Yap_catlast-only89i_peak_28511	chrX	17423425	17423557	+	216	NA	intron (NM_001291867, intron 1 of 8)	intron (NM_001291867, intron 1 of 8)	-20513	NR_039925	100616249		NR_039925	ENSG00000265465	MIR4768	-	microRNA 4768	ncRNA	MIR4768
Yap_catlast-only89i_peak_25400	chr7	133538322	133538986	+	216	NA	intron (NM_021807, intron 11 of 17)	intron (NM_021807, intron 11 of 17)	-29013	NR_120513	101928861	Hs.675747	NR_120513		LOC101928861	-	uncharacterized LOC101928861	ncRNA	LOC101928861
Yap_catlast-only89i_peak_3101	chr10	49197220	49197337	+	216	NA	Intergenic	Intergenic	10547	NM_001137548	644054	Hs.99249	NM_001137548	ENSG00000276430	FAM25C	bA164N7.4	family with sequence similarity 25 member C	protein-coding	FAM25C
Yap_catlast-only89i_peak_14886	chr2	135812836	135813293	+	216	NA	intron (NM_012233, intron 2 of 23)	AluJb|SINE|Alu	3229	NM_001172435	22930	Hs.306327	NM_012233	ENSG00000115839	RAB3GAP1	P130|RAB3GAP|RAB3GAP130|WARBM1	RAB3 GTPase activating protein catalytic subunit 1	protein-coding
Yap_catlast-only89i_peak_23864	chr6	151767194	151767691	+	216	NA	intron (NM_017909, intron 1 of 11)	AluJb|SINE|Alu	5874	NM_017909	55005	Hs.486835	NM_017909	ENSG00000155906	RMND1	C6orf96|COXPD11|RMD1|bA351K16|bA351K16.3	required for meiotic nuclear division 1 homolog	protein-coding	RMND1
Yap_catlast-only89i_peak_13248	chr19	11651577	11651892	+	216	NA	intron (NM_001308341, intron 2 of 7)	intron (NM_001308341, intron 2 of 7)	2202	NM_001299	1264	Hs.465929	NM_001299	ENSG00000130176	CNN1	HEL-S-14|SMCC|Sm-Calp	calponin 1	protein-coding	CNN1
Yap_catlast-only89i_peak_24270	chr7	23753537	23753803	+	216	NA	intron (NM_032944, intron 3 of 23)	Tigger3b|DNA|TcMar-Tigger	3725	NM_001260504	56164	Hs.309767	NM_031414	ENSG00000196335	STK31	SGK396|TDRD8	serine/threonine kinase 31	protein-coding
Yap_catlast-only89i_peak_28	chr1	1617561	1618026	+	216	NA	intron (NM_001110781, intron 1 of 8)	intron (NM_001110781, intron 1 of 8)	6450	NM_001290264	728661	Hs.655255	NM_001110781	ENSG00000189339	SLC35E2B	SLC35E2	solute carrier family 35 member E2B	protein-coding
Yap_catlast-only89i_peak_2011	chr1	193080687	193081077	+	216	NA	Intergenic	AluJo|SINE|Alu	-5638	NM_016066	51022	Hs.458283	NM_016066	ENSG00000023572	GLRX2	CGI-133|GRX2	glutaredoxin 2	protein-coding	GLRX2
Yap_catlast-only89i_peak_11887	chr17	44804972	44805343	+	215	NA	intron (NR_040116, intron 15 of 19)	intron (NR_040116, intron 15 of 19)	90969	NM_030753	7473	Hs.445884	NM_030753	ENSG00000108379	WNT3	INT4|TETAMS	Wnt family member 3	protein-coding	WNT3
Yap_catlast-only89i_peak_603	chr1	29523365	29523705	+	215	NA	intron (NM_016011, intron 7 of 9)	AluJb|SINE|Alu	-14898	NM_005626	6429	Hs.469970	NM_005626	ENSG00000116350	SRSF4	SFRS4|SRP75	serine and arginine rich splicing factor 4	protein-coding	SRSF4
Yap_catlast-only89i_peak_6600	chr12	33044953	33045260	+	215	NA	intron (NM_001005242, intron 1 of 12)	intron (NM_001005242, intron 1 of 12)	4674	NM_004572	5318	Hs.164384	NM_004572	ENSG00000057294	PKP2	ARVD9	plakophilin 2	protein-coding	PKP2
Yap_catlast-only89i_peak_28343	chr9	134875536	134875794	+	215	NA	intron (NM_004269, intron 3 of 7)	L1ME1|LINE|L1	79609	NM_001253882	9442	Hs.374262	NM_004269	ENSG00000160563	MED27	CRAP34|CRSP34|CRSP8|MED3|TRAP37	mediator complex subunit 27	protein-coding
Yap_catlast-only89i_peak_9741	chr15	67401618	67402193	+	214	NA	intron (NM_005902, intron 1 of 8)	intron (NM_005902, intron 1 of 8)	-16149	NM_001145102	4088	Hs.727986	NM_005902	ENSG00000166949	SMAD3	HSPC193|HsT17436|JV15-2|LDS1C|LDS3|MADH3	SMAD family member 3	protein-coding
Yap_catlast-only89i_peak_5619	chr11	88213338	88213661	+	214	NA	Intergenic	Intergenic	-24245	NR_049724	100873989	Hs.616625	NR_049724	ENSG00000255082	GRM5-AS1	-	GRM5 antisense RNA 1	ncRNA	GRM5-AS1
Yap_catlast-only89i_peak_28178	chr9	127722348	127722971	+	214	NA	intron (NM_173690, intron 18 of 18)	AluJr4|SINE|Alu	-19273	NM_002077	2800	Hs.59504	NM_002077	ENSG00000136935	GOLGA1	golgin-97	golgin A1	protein-coding	GOLGA1
Yap_catlast-only89i_peak_18593	chr3	135615517	135615789	+	214	NA	Intergenic	Intergenic	-68862	NM_001190447	5523	Hs.518155	NM_002718	ENSG00000073711	PPP2R3A	PPP2R3|PR130|PR72	protein phosphatase 2 regulatory subunit B''alpha	protein-coding
Yap_catlast-only89i_peak_22401	chr6	11207417	11207769	+	213	NA	intron (NM_182966, intron 2 of 2)	(TG)n|Simple_repeat|Simple_repeat	25322	NM_182966	4739	Hs.37982	NM_006403	ENSG00000111859	NEDD9	CAS-L|CAS2|CASL|CASS2|HEF1	neural precursor cell expressed, developmentally down-regulated 9	protein-coding
Yap_catlast-only89i_peak_8051	chr13	48813642	48813856	+	213	NA	intron (NM_021999, intron 1 of 5)	AluSx|SINE|Alu	6475	NM_021999	9445	Hs.643683	NM_021999	ENSG00000136156	ITM2B	ABRI|BRI|BRI2|BRICD2B|E25B|E3-16|FBD|RDGCA|imBRI2	integral membrane protein 2B	protein-coding	ITM2B
Yap_catlast-only89i_peak_21676	chr5	139702377	139702735	+	213	NA	Intergenic	Intergenic	-19867	NM_002622	5201	Hs.483564	NM_002622	ENSG00000113068	PFDN1	PDF|PFD1	prefoldin subunit 1	protein-coding	PFDN1
Yap_catlast-only89i_peak_1499	chr1	112946996	112947433	+	213	NA	intron (NM_018704, intron 1 of 5)	intron (NM_018704, intron 1 of 5)	8414	NM_018704	55917	Hs.744100	NM_018704	ENSG00000143079	CTTNBP2NL	-	CTTNBP2 N-terminal like	protein-coding	CTTNBP2NL
Yap_catlast-only89i_peak_19832	chr4	85907087	85907366	+	213	NA	intron (NR_015359, intron 2 of 3)	Tigger1|DNA|TcMar-Tigger	19255	NR_015359	404201	Hs.720920	NM_205857	ENSG00000180769	WDFY3-AS2	C4orf12|FBI4|NCRNA00247	WDFY3 antisense RNA 2	ncRNA
Yap_catlast-only89i_peak_14099	chr2	20490869	20491191	+	213	NA	intron (NM_015317, intron 9 of 20)	intron (NM_015317, intron 9 of 20)	36117	NM_001282791	23369	Hs.467824	NM_015317	ENSG00000055917	PUM2	PUMH2|PUML2	pumilio RNA binding family member 2	protein-coding
Yap_catlast-only89i_peak_2222	chr1	211786887	211787217	+	213	NA	Intergenic	AluJr|SINE|Alu	-26098	NR_131925	105748977	Hs.553186	NR_131925		LINC01693	-	long intergenic non-protein coding RNA 1693	ncRNA
Yap_catlast-only89i_peak_5004	chr11	60906348	60906604	+	213	NA	intron (NM_017966, intron 1 of 4)	intron (NM_017966, intron 1 of 4)	22440	NM_017966	55048	Hs.523715	NM_017966	ENSG00000167987	VPS37C	-	VPS37C, ESCRT-I subunit	protein-coding	VPS37C
Yap_catlast-only89i_peak_5708	chr11	100610424	100610790	+	213	NA	intron (NM_152432, intron 1 of 23)	intron (NM_152432, intron 1 of 23)	-51921	NR_133571	100128386	Hs.635125	NR_133571	ENSG00000248027	LOC100128386	-	uncharacterized LOC100128386	ncRNA
Yap_catlast-only89i_peak_20051	chr4	129244288	129244541	+	213	NA	Intergenic	L2a|LINE|L2	-34430	NM_006320	10424	Hs.507910	NM_006320	ENSG00000164040	PGRMC2	DG6|PMBP	progesterone receptor membrane component 2	protein-coding	PGRMC2
Yap_catlast-only89i_peak_4684	chr11	28857801	28858266	+	213	NA	Intergenic	L2a|LINE|L2	-358938	NR_107035	102466876		NR_107035	ENSG00000273912	MIR8068	hsa-mir-8068	microRNA 8068	ncRNA	MIR8068
Yap_catlast-only89i_peak_18770	chr3	149183958	149184462	+	213	NA	Intergenic	Intergenic	-8158	NM_004617	7104	Hs.133527	NM_004617	ENSG00000169903	TM4SF4	ILTMP|il-TMP	transmembrane 4 L six family member 4	protein-coding	TM4SF4
Yap_catlast-only89i_peak_10325	chr16	22408803	22409239	+	213	NA	intron (NR_136333, intron 1 of 3)	FLAM_A|SINE|Alu	11931	NR_136333	105371130	Hs.639607	NR_136333		MFSD13B	-	major facilitator superfamily domain containing 13B	pseudo
Yap_catlast-only89i_peak_2289	chr1	218847892	218848225	+	213	NA	intron (NR_031644, intron 3 of 6)	intron (NR_031644, intron 3 of 6)	232090	NR_125715	103611157	Hs.133379	NR_125715	ENSG00000281453	TGFB2-OT1	-	TGFB2 overlapping transcript 1	ncRNA	TGFB2-OT1
Yap_catlast-only89i_peak_1034	chr1	59479288	59479607	+	213	NA	Intergenic	Intergenic	-6701	NR_110626	101926925		NR_110626		LINC01358	-	long intergenic non-protein coding RNA 1358	ncRNA	LINC01358
Yap_catlast-only89i_peak_12743	chr18	43573344	43573933	+	213	NA	exon (NM_024430, exon 10 of 15)	exon (NM_024430, exon 10 of 15)	-26333	NM_020964	57724	Hs.514843	NM_020964	ENSG00000152223	EPG5	HEEW1|KIAA1632|VICIS	ectopic P-granules autophagy protein 5 homolog	protein-coding	EPG5
Yap_catlast-only89i_peak_15596	chr2	234890978	234891290	+	213	NA	intron (NM_024080, intron 19 of 25)	intron (NM_024080, intron 19 of 25)	65091	NM_024080	79054	Hs.366053	NM_024080	ENSG00000144481	TRPM8	LTRPC6|TRPP8	transient receptor potential cation channel subfamily M member 8	protein-coding	TRPM8
Yap_catlast-only89i_peak_7140	chr12	77113875	77114227	+	213	NA	Intergenic	L1M1|LINE|L1	-43803	NM_015336	23390	Hs.4014	NM_015336	ENSG00000186908	ZDHHC17	HIP14|HIP3|HSPC294|HYPH	zinc finger DHHC-type containing 17	protein-coding	ZDHHC17
Yap_catlast-only89i_peak_19347	chr4	5039667	5040177	+	212	NA	Intergenic	Intergenic	-13322	NM_018401	55351	Hs.133062	NM_018401	ENSG00000152953	STK32B	HSA250839|STK32|STKG6|YANK2	serine/threonine kinase 32B	protein-coding	STK32B
Yap_catlast-only89i_peak_20266	chr4	169404984	169405326	+	212	NA	Intergenic	Intergenic	-3490	NM_001012967	91351	Hs.535011	NM_001012967	ENSG00000181381	DDX60L	-	DEAD-box helicase 60-like	protein-coding	DDX60L
Yap_catlast-only89i_peak_22670	chr6	30727319	30727708	+	212	NA	Intergenic	Intergenic	-7089	NR_138037	105375013	Hs.348584	NR_138037	ENSG00000228022	HCG20	NCRNA00149	HLA complex group 20 (non-protein coding)	ncRNA
Yap_catlast-only89i_peak_16074	chr20	32497295	32497724	+	212	NA	Intergenic	MER65D|LTR|ERV1	-83949	NM_016732	22913	Hs.136947	NM_007367	ENSG00000125970	RALY	HNRPCL2|P542	RALY heterogeneous nuclear ribonucleoprotein	protein-coding
Yap_catlast-only89i_peak_25478	chr7	141285706	141286059	+	212	NA	intron (NM_018238, intron 2 of 15)	intron (NM_018238, intron 2 of 15)	34804	NM_018238	55750	Hs.743318	NM_018238	ENSG00000006530	AGK	CATC5|CTRCT38|MTDPS10|MULK	acylglycerol kinase	protein-coding	AGK
Yap_catlast-only89i_peak_4000	chr10	112255724	112256131	+	212	NA	Intergenic	Intergenic	-1698	NM_004419	1847	Hs.2128	NM_004419	ENSG00000138166	DUSP5	DUSP|HVH3	dual specificity phosphatase 5	protein-coding	DUSP5
Yap_catlast-only89i_peak_5672	chr11	95569104	95569478	+	212	NA	intron (NM_001243571, intron 17 of 17)	intron (NM_001243571, intron 17 of 17)	45666	NM_001243777	9702	Hs.101014	NM_014679	ENSG00000166037	CEP57	MVA2|PIG8|TSP57	centrosomal protein 57	protein-coding
Yap_catlast-only89i_peak_12196	chr17	67758180	67758545	+	212	NA	intron (NR_109972, intron 3 of 4)	intron (NR_109972, intron 3 of 4)	168234	NR_109972	101928122	Hs.579342	NR_109971	ENSG00000227517	LINC01483	-	long intergenic non-protein coding RNA 1483	ncRNA
Yap_catlast-only89i_peak_19670	chr4	55031524	55031950	+	211	NA	Intergenic	L2c|LINE|L2	-63519	NM_001347827	5156	Hs.74615	NM_006206	ENSG00000134853	PDGFRA	CD140A|PDGFR-2|PDGFR2	platelet derived growth factor receptor alpha	protein-coding
Yap_catlast-only89i_peak_1147	chr1	68306105	68306442	+	211	NA	intron (NR_040077, intron 1 of 9)	intron (NR_040077, intron 1 of 9)	-7118	NM_018841	55970	Hs.431101	NM_018841	ENSG00000172380	GNG12	-	G protein subunit gamma 12	protein-coding	GNG12
Yap_catlast-only89i_peak_15267	chr2	196988443	196988782	+	211	NA	Intergenic	LTR19C|LTR|ERV1	47724	NM_004226	9262	Hs.88297	NM_004226	ENSG00000081320	STK17B	DRAK2	serine/threonine kinase 17b	protein-coding	STK17B
Yap_catlast-only89i_peak_4768	chr11	35563506	35564067	+	211	NA	Intergenic	Intergenic	-11938	NM_001282675	25891	Hs.55044	NM_015430	ENSG00000149090	PAMR1	DKFZP586H2123|FP938|RAMP	peptidase domain containing associated with muscle regeneration 1	protein-coding
Yap_catlast-only89i_peak_4700	chr11	32055688	32056179	+	210	NA	Intergenic	Intergenic	6931	NR_120527	100506675	Hs.446169	NR_120526	ENSG00000254584	LOC100506675	-	uncharacterized LOC100506675	ncRNA
Yap_catlast-only89i_peak_5463	chr11	75130038	75130375	+	210	NA	intron (NM_001256802, intron 6 of 6)	Looper|DNA|PiggyBac	11468	NM_001039548	283212	Hs.292451	NM_173583	ENSG00000149243	KLHL35	-	kelch like family member 35	protein-coding
Yap_catlast-only89i_peak_9021	chr14	75585786	75586099	+	210	NA	intron (NM_033116, intron 4 of 21)	AluJb|SINE|Alu	7841	NM_001329238	91754	Hs.7200	NM_033116	ENSG00000119638	NEK9	APUG|LCCS10|NC|NERCC|NERCC1	NIMA related kinase 9	protein-coding
Yap_catlast-only89i_peak_684	chr1	33896640	33896808	+	210	NA	Intergenic	CpG	-41508	NM_145238	7579	Hs.442705	NM_145238	ENSG00000121903	ZSCAN20	KOX29|ZFP-31|ZNF31|ZNF360	zinc finger and SCAN domain containing 20	protein-coding	ZSCAN20
Yap_catlast-only89i_peak_5946	chr11	119469479	119469681	+	210	NA	Intergenic	MIR|SINE|MIR	129855	NM_203286	5818	Hs.334846	NM_002855	ENSG00000110400	NECTIN1	CD111|CLPED1|ED4|HIgR|HV1S|HVEC|OFC7|PRR|PRR1|PVRL1|PVRR|PVRR1|SK-12|nectin-1	nectin cell adhesion molecule 1	protein-coding
Yap_catlast-only89i_peak_462	chr1	24592808	24593251	+	210	NA	Intergenic	Intergenic	-52783	NM_198173	57822	Hs.657920	NM_021180	ENSG00000158055	GRHL3	SOM|TFCP2L4|VWS2	grainyhead like transcription factor 3	protein-coding
Yap_catlast-only89i_peak_12279	chr17	74712957	74713317	+	210	NA	intron (NM_001081461, intron 6 of 6)	intron (NM_001081461, intron 6 of 6)	-6050	NM_001008528	439921	Hs.250723	NM_198530	ENSG00000182534	MXRA7	PS1TP1|TMAP1	matrix remodeling associated 7	protein-coding
Yap_catlast-only89i_peak_18953	chr3	169939821	169940431	+	210	NA	promoter-TSS (NM_002740)	promoter-TSS (NM_002740)	-94	NM_002740	5584	Hs.478199	NM_002740	ENSG00000163558	PRKCI	DXS1179E|PKCI|nPKC-iota	protein kinase C iota	protein-coding	PRKCI
Yap_catlast-only89i_peak_533	chr1	27337495	27337834	+	210	NA	intron (NM_052943, intron 1 of 1)	intron (NM_052943, intron 1 of 1)	1669	NM_052943	115572	Hs.632378	NM_052943	ENSG00000158246	FAM46B	-	family with sequence similarity 46 member B	protein-coding	FAM46B
Yap_catlast-only89i_peak_28934	chrX	135296609	135297310	+	210	NA	3' UTR (NM_001173517, exon 18 of 18)	3' UTR (NM_001173517, exon 18 of 18)	17904	NM_001330659	2273	Hs.435369	NM_001449	ENSG00000022267	FHL1	FHL-1|FHL1A|FHL1B|FLH1A|KYOT|RBMX1A|RBMX1B|SLIM|SLIM-1|SLIM1|SLIMMER|XMPMA	four and a half LIM domains 1	protein-coding
Yap_catlast-only89i_peak_7784	chr13	22157710	22157976	+	210	NA	intron (NM_152726, intron 1 of 11)	intron (NM_152726, intron 1 of 11)	20512	NM_152726	221154	Hs.412103	NM_152726	ENSG00000165487	MICU2	1110008L20Rik|EFHA1	mitochondrial calcium uptake 2	protein-coding	MICU2
Yap_catlast-only89i_peak_15135	chr2	175307639	175307799	+	210	NA	intron (NM_152529, intron 13 of 15)	intron (NM_152529, intron 13 of 15)	44097	NM_001267050	151556	Hs.516604	NM_152529	ENSG00000163328	GPR155	DEP.7|DEPDC3|PGR22	G protein-coupled receptor 155	protein-coding
Yap_catlast-only89i_peak_17028	chr22	27114844	27115292	+	210	NA	intron (NR_110543, intron 2 of 5)	intron (NR_110543, intron 2 of 5)	46262	NR_110543	102724827	Hs.642767	NR_110543		MIATNB	-	MIAT neighbor (non-protein coding)	ncRNA	MIATNB
Yap_catlast-only89i_peak_17709	chr3	29227640	29228006	+	210	NA	Intergenic	Intergenic	94607	NR_109804	100873979	Hs.99391	NR_109804		RBMS3-AS3	-	RBMS3 antisense RNA 3	ncRNA	RBMS3-AS3
Yap_catlast-only89i_peak_1294	chr1	92366110	92366422	+	210	NA	intron (NM_001195684, intron 1 of 17)	intron (NM_001195684, intron 1 of 17)	5293	NM_001195684	7049	Hs.482390	NM_003243	ENSG00000069702	TGFBR3	BGCAN|betaglycan	transforming growth factor beta receptor 3	protein-coding
Yap_catlast-only89i_peak_1569	chr1	117363114	117363321	+	210	NA	Intergenic	Intergenic	66165	NM_001328609	914	Hs.523500	NM_001767	ENSG00000116824	CD2	LFA-2|SRBC|T11	CD2 molecule	protein-coding
Yap_catlast-only89i_peak_15324	chr2	202662924	202663546	+	210	NA	Intergenic	Intergenic	-7917	NM_139158	65061	Hs.348711	NM_139158	ENSG00000138395	CDK15	ALS2CR7|PFTAIRE2|PFTK2	cyclin dependent kinase 15	protein-coding	CDK15
Yap_catlast-only89i_peak_20046	chr4	129162736	129163135	+	210	NA	Intergenic	Intergenic	47049	NM_006320	10424	Hs.507910	NM_006320	ENSG00000164040	PGRMC2	DG6|PMBP	progesterone receptor membrane component 2	protein-coding	PGRMC2
Yap_catlast-only89i_peak_26455	chr8	91533064	91533362	+	210	NA	Intergenic	HAL1|LINE|L1	85078	NR_104062	101937451	Hs.583685	NR_104062	ENSG00000253799	LINC01030	-	long intergenic non-protein coding RNA 1030	ncRNA	LINC01030
Yap_catlast-only89i_peak_23228	chr6	74290074	74290506	+	210	NA	Intergenic	Intergenic	-59535	NM_001402	1915	Hs.535192	NM_001402	ENSG00000156508	EEF1A1	CCS-3|CCS3|EE1A1|EEF-1|EEF1A|EF-Tu|EF1A|GRAF-1EF|HNGC:16303|LENG7|PTI1|eEF1A-1	eukaryotic translation elongation factor 1 alpha 1	protein-coding	EEF1A1
Yap_catlast-only89i_peak_26740	chr8	119047306	119047684	+	210	NA	intron (NM_000127, intron 1 of 10)	intron (NM_000127, intron 1 of 10)	76563	NM_000127	2131	Hs.492618	NM_000127	ENSG00000182197	EXT1	EXT|LGCR|LGS|TRPS2|TTV	exostosin glycosyltransferase 1	protein-coding	EXT1
Yap_catlast-only89i_peak_12746	chr18	43735511	43735940	+	210	NA	Intergenic	L2b|LINE|L2	-18263	NM_001008239	147339	Hs.116486	NM_145055	ENSG00000152242	C18orf25	ARKL1|RNF111L1	chromosome 18 open reading frame 25	protein-coding
Yap_catlast-only89i_peak_15025	chr2	161439297	161439713	+	210	NA	Intergenic	Intergenic	-89187	NM_002897	5937	Hs.470412	NM_002897	ENSG00000153250	RBMS1	C2orf12|HCC-4|MSSP|MSSP-1|MSSP-2|MSSP-3|SCR2|YC1	RNA binding motif single stranded interacting protein 1	protein-coding	RBMS1
Yap_catlast-only89i_peak_25106	chr7	105416408	105416874	+	210	NA	intron (NM_152749, intron 3 of 3)	intron (NM_152749, intron 3 of 3)	-96993	NM_001318229	222255	Hs.745056	NM_020725	ENSG00000146776	ATXN7L1	ATXN7L4	ataxin 7 like 1	protein-coding
Yap_catlast-only89i_peak_15700	chr20	891561	891822	+	210	NA	intron (NM_015985, intron 1 of 8)	intron (NM_015985, intron 1 of 8)	5286	NM_015985	51378	Hs.278973	NM_015985	ENSG00000101280	ANGPT4	ANG3|ANG4	angiopoietin 4	protein-coding	ANGPT4
Yap_catlast-only89i_peak_4370	chr11	6452984	6453403	+	210	NA	exon (NM_000613, exon 8 of 10)	exon (NM_000613, exon 8 of 10)	9061	NM_000613	3263	Hs.426485	NM_000613	ENSG00000110169	HPX	HX	hemopexin	protein-coding	HPX
Yap_catlast-only89i_peak_23777	chr6	141908884	141909308	+	210	NA	Intergenic	L2c|LINE|L2	500840	NM_002511	4829	Hs.552106	NM_002511	ENSG00000135577	NMBR	BB1|BB1R|NMB-R	neuromedin B receptor	protein-coding	NMBR
Yap_catlast-only89i_peak_26728	chr8	118859843	118860253	+	210	NA	intron (NM_000127, intron 1 of 10)	intron (NM_000127, intron 1 of 10)	264010	NM_000127	2131	Hs.492618	NM_000127	ENSG00000182197	EXT1	EXT|LGCR|LGS|TRPS2|TTV	exostosin glycosyltransferase 1	protein-coding	EXT1
Yap_catlast-only89i_peak_24543	chr7	46495882	46496293	+	210	NA	Intergenic	Intergenic	240633	NR_134575	730338	Hs.640207	NR_134575	ENSG00000233539	LOC730338	-	uncharacterized LOC730338	ncRNA
Yap_catlast-only89i_peak_10243	chr16	14403653	14404128	+	210	NA	TTS (NR_029854)	TTS (NR_029854)	748	NR_029854	100126355		NR_029854	ENSG00000199130	MIR365A	MIR365-1|MIRN365-1|hsa-mir-365a|mir-365a	microRNA 365a	ncRNA	MIR365A
Yap_catlast-only89i_peak_14651	chr2	96917401	96917699	+	210	NA	3' UTR (NM_001193304, exon 4 of 4)	3' UTR (NM_001193304, exon 4 of 4)	14201	NM_017849	55654	Hs.164303	NM_017849	ENSG00000135956	TMEM127	-	transmembrane protein 127	protein-coding	TMEM127
Yap_catlast-only89i_peak_22409	chr6	11425883	11426103	+	210	NA	Intergenic	Intergenic	-43412	NR_073131	4739	Hs.37982	NM_006403	ENSG00000111859	NEDD9	CAS-L|CAS2|CASL|CASS2|HEF1	neural precursor cell expressed, developmentally down-regulated 9	protein-coding
Yap_catlast-only89i_peak_4380	chr11	7715899	7716285	+	210	NA	intron (NM_198185, intron 13 of 15)	intron (NM_198185, intron 13 of 15)	11849	NM_198185	341277	Hs.532475	NM_198185	ENSG00000183378	OVCH2	OVTN	ovochymase 2 (gene/pseudogene)	protein-coding	OVCH2
Yap_catlast-only89i_peak_21453	chr5	124746956	124747284	+	210	NA	Intergenic	Intergenic	-81834	NR_109887	101927460	Hs.407582	NR_109887	ENSG00000260192	LOC101927460	-	uncharacterized LOC101927460	ncRNA	LOC101927460
Yap_catlast-only89i_peak_21180	chr5	81047140	81047383	+	210	NA	promoter-TSS (NM_001256732)	promoter-TSS (NM_001256732)	-189	NM_001345886	23635	Hs.102735	NM_012446	ENSG00000145687	SSBP2	HSPC116|SOSS-B2	single stranded DNA binding protein 2	protein-coding
Yap_catlast-only89i_peak_14126	chr2	26108728	26109159	+	210	NA	Intergenic	ERV3-16A3_I-int|LTR|ERVL	-7631	NM_018263	55252	Hs.119815	NM_018263	ENSG00000143970	ASXL2	ASXH2|SHAPNS	additional sex combs like 2, transcriptional regulator	protein-coding	ASXL2
Yap_catlast-only89i_peak_14686	chr2	101358776	101359180	+	210	NA	Intergenic	Intergenic	-77635	NM_002518	4862	Hs.156832	NM_002518	ENSG00000170485	NPAS2	MOP4|PASD4|bHLHe9	neuronal PAS domain protein 2	protein-coding	NPAS2
Yap_catlast-only89i_peak_19668	chr4	54948400	54948756	+	210	NA	Intergenic	Intergenic	-17670	NM_133267	170825	Hs.371899	NM_133267	ENSG00000180613	GSX2	GSH2	GS homeobox 2	protein-coding	GSX2
Yap_catlast-only89i_peak_2723	chr10	17008113	17008407	+	209	NA	intron (NM_001081, intron 31 of 66)	intron (NM_001081, intron 31 of 66)	-148807	NM_012425	6251	Hs.524161	NM_012425	ENSG00000148484	RSU1	RSP-1	Ras suppressor protein 1	protein-coding	RSU1
Yap_catlast-only89i_peak_27561	chr9	73569076	73569489	+	209	NA	intron (NM_001007471, intron 1 of 24)	intron (NM_001007471, intron 1 of 24)	-85308	NM_001007470	80036	Hs.47288	NM_020952	ENSG00000083067	TRPM3	GON-2|LTRPC3|MLSN2	transient receptor potential cation channel subfamily M member 3	protein-coding
Yap_catlast-only89i_peak_25223	chr7	116346635	116346949	+	209	NA	intron (NM_001127500, intron 2 of 20)	AmnSINE1|SINE|Deu	34348	NM_001324401	4233	Hs.132966	NM_000245	ENSG00000105976	MET	AUTS9|DFNB97|HGFR|RCCP2|c-Met	MET proto-oncogene, receptor tyrosine kinase	protein-coding
Yap_catlast-only89i_peak_26433	chr8	81962988	81963221	+	209	NA	intron (NM_018440, intron 2 of 8)	intron (NM_018440, intron 2 of 8)	61199	NM_018440	55824	Hs.266175	NM_018440	ENSG00000076641	PAG1	CBP|PAG	phosphoprotein membrane anchor with glycosphingolipid microdomains 1	protein-coding	PAG1
Yap_catlast-only89i_peak_15350	chr2	204624240	204624700	+	209	NA	Intergenic	L1MA3|LINE|L1	53272	NM_001243077	940	Hs.443123	NM_006139	ENSG00000178562	CD28	Tp44	CD28 molecule	protein-coding
Yap_catlast-only89i_peak_16272	chr20	43205630	43205941	+	209	NA	intron (NM_007066, intron 1 of 3)	AluSz|SINE|Alu	-5405	NM_001281445	11142	Hs.472831	NM_007066	ENSG00000168734	PKIG	PKI-gamma	cAMP-dependent protein kinase inhibitor gamma	protein-coding
Yap_catlast-only89i_peak_23152	chr6	56673922	56674228	+	209	NA	intron (NM_001144769, intron 4 of 96)	intron (NM_001144769, intron 4 of 96)	34388	NM_183380	667	Hs.604915	NM_001723	ENSG00000151914	DST	BP240|BPA|BPAG1|CATX-15|CATX15|D6S1101|DMH|DT|EBSB2|HSAN6|MACF2	dystonin	protein-coding
Yap_catlast-only89i_peak_3343	chr10	72424585	72424940	+	209	NA	Intergenic	Intergenic	-7500	NM_139155	140766	Hs.352156	NM_080722	ENSG00000138316	ADAMTS14	-	ADAM metallopeptidase with thrombospondin type 1 motif 14	protein-coding
Yap_catlast-only89i_peak_10168	chr16	4349001	4349451	+	208	NA	Intergenic	Intergenic	-15536	NM_001318918	84662	Hs.592087	NM_032575	ENSG00000126603	GLIS2	NKL|NPHP7	GLIS family zinc finger 2	protein-coding
Yap_catlast-only89i_peak_11770	chr17	39218328	39218627	+	208	NA	Intergenic	Intergenic	-2133	NM_001165252	730755	Hs.406714	NM_001165252	ENSG00000212724	KRTAP2-3	KAP2.3|KRTAP2.3	keratin associated protein 2-3	protein-coding	KRTAP2-3
Yap_catlast-only89i_peak_26517	chr8	97145035	97145249	+	208	NA	Intergenic	Intergenic	27878	NM_001001557	392255	Hs.492277	NM_001001557	ENSG00000156466	GDF6	BMP-13|BMP13|CDMP2|KFM|KFS|KFS1|KFSL|SGM1	growth differentiation factor 6	protein-coding	GDF6
Yap_catlast-only89i_peak_11882	chr17	44150387	44150743	+	208	NA	intron (NM_001193465, intron 5 of 15)	intron (NM_001193465, intron 5 of 15)	73949	NM_001007532	246744	Hs.661831	NM_001007532	ENSG00000256762	STH	MAPTIT	saitohin	protein-coding	STH
Yap_catlast-only89i_peak_27006	chr8	131704446	131704732	+	208	NA	Intergenic	L1P4d|LINE|L1	-248683	NM_018482	50807	Hs.655552	NM_018482	ENSG00000153317	ASAP1	AMAP1|CENTB4|DDEF1|PAG2|PAP|ZG14P	ArfGAP with SH3 domain, ankyrin repeat and PH domain 1	protein-coding	ASAP1
Yap_catlast-only89i_peak_15095	chr2	172292919	172293212	+	208	NA	intron (NM_001164821, intron 2 of 11)	L1MB8|LINE|L1	-1752	NM_001321161	79828	Hs.135146	NM_024770	ENSG00000123600	METTL8	TIP	methyltransferase like 8	protein-coding
Yap_catlast-only89i_peak_8420	chr14	23446830	23447144	+	207	NA	promoter-TSS (NM_198086)	promoter-TSS (NM_198086)	-555	NM_198086	84962	Hs.655832	NM_032876	ENSG00000129474	AJUBA	JUB	ajuba LIM protein	protein-coding
Yap_catlast-only89i_peak_23088	chr6	52405069	52405367	+	207	NA	intron (NM_012288, intron 1 of 10)	L4|LINE|RTE	36644	NM_012288	9697	Hs.520182	NM_012288	ENSG00000065308	TRAM2	-	translocation associated membrane protein 2	protein-coding	TRAM2
Yap_catlast-only89i_peak_5374	chr11	70997923	70998568	+	207	NA	Intergenic	L1M5|LINE|L1	-62403	NM_012309	22941	Hs.268726	NM_012309	ENSG00000162105	SHANK2	AUTS17|CORTBP1|CTTNBP1|ProSAP1|SHANK|SPANK-3	SH3 and multiple ankyrin repeat domains 2	protein-coding	SHANK2
Yap_catlast-only89i_peak_9037	chr14	76027296	76027507	+	207	NA	Intergenic	Intergenic	-17539	NM_017791	55640	Hs.509966	NM_017791	ENSG00000119686	FLVCR2	C14orf58|CCT|EPV|FLVCRL14q|MFSD7C|PVHH	feline leukemia virus subgroup C cellular receptor family member 2	protein-coding	FLVCR2
Yap_catlast-only89i_peak_26797	chr8	121869728	121870033	+	207	NA	Intergenic	Intergenic	-45571	NM_021021	6641	Hs.46701	NM_021021	ENSG00000172164	SNTB1	59-DAP|A1B|BSYN2|DAPA1B|SNT2|SNT2B1|TIP-43	syntrophin beta 1	protein-coding	SNTB1
Yap_catlast-only89i_peak_86	chr1	7462003	7462366	+	207	NA	intron (NM_015215, intron 5 of 22)	intron (NM_015215, intron 5 of 22)	-369145	NM_004781	9341	Hs.66708	NM_004781	ENSG00000049245	VAMP3	CEB	vesicle associated membrane protein 3	protein-coding	VAMP3
Yap_catlast-only89i_peak_27100	chr8	142164074	142164662	+	207	NA	intron (NM_014957, intron 7 of 22)	intron (NM_014957, intron 7 of 22)	25648	NM_014957	22898	Hs.18166	NM_014957	ENSG00000105339	DENND3	-	DENN domain containing 3	protein-coding	DENND3
Yap_catlast-only89i_peak_22908	chr6	37693630	37694109	+	207	NA	Intergenic	Intergenic	-28103	NM_153487	266727	Hs.437993	NM_153487	ENSG00000112139	MDGA1	GPIM|MAMDC3	MAM domain containing glycosylphosphatidylinositol anchor 1	protein-coding	MDGA1
Yap_catlast-only89i_peak_2455	chr1	235561057	235561216	+	207	NA	intron (NM_001287802, intron 2 of 15)	intron (NM_001287802, intron 2 of 15)	30461	NM_001079515	6905	Hs.744998	NM_003193	ENSG00000116957	TBCE	HRD|KCS|KCS1|PEAMO|pac2	tubulin folding cofactor E	protein-coding
Yap_catlast-only89i_peak_994	chr1	56184489	56184882	+	207	NA	Intergenic	Intergenic	493371	NR_039618	100616272		NR_039618	ENSG00000265822	MIR4422	mir-4422	microRNA 4422	ncRNA	MIR4422
Yap_catlast-only89i_peak_12756	chr18	45529318	45529649	+	207	NA	Intergenic	Intergenic	-71966	NM_001003652	4087	Hs.12253	NM_005901	ENSG00000175387	SMAD2	JV18|JV18-1|MADH2|MADR2|hMAD-2|hSMAD2	SMAD family member 2	protein-coding
Yap_catlast-only89i_peak_20066	chr4	129494991	129495230	+	207	NA	Intergenic	Intergenic	145939	NR_125882	100507487	Hs.549644	NR_125882	ENSG00000251432	LOC100507487	-	uncharacterized LOC100507487	ncRNA	LOC100507487
Yap_catlast-only89i_peak_6829	chr12	54164043	54164481	+	207	NA	Intergenic	Intergenic	-13444	NR_104332	102216268	Hs.742074	NR_104332	ENSG00000260492	CISTR	CISTR-ACT|CISTRACT|re52431	chondrogenesis-associated transcript	ncRNA	CISTR
Yap_catlast-only89i_peak_5603	chr11	87136994	87137466	+	207	NA	Intergenic	Intergenic	293073	NR_135090	105369423	Hs.125442	NR_135090	ENSG00000255183	LOC105369423	-	uncharacterized LOC105369423	ncRNA
Yap_catlast-only89i_peak_1357	chr1	95111596	95112132	+	207	NA	Intergenic	Intergenic	99592	NR_039620	100616321		NR_039620	ENSG00000263526	MIR378G	-	microRNA 378g	ncRNA	MIR378G
Yap_catlast-only89i_peak_10937	chr16	84873438	84873898	+	207	NA	intron (NM_031476, intron 2 of 14)	intron (NM_031476, intron 2 of 14)	20081	NM_031476	83716	Hs.513779	NM_031476	ENSG00000103196	CRISPLD2	CRISP11|LCRISP2|LGL1	cysteine rich secretory protein LCCL domain containing 2	protein-coding	CRISPLD2
Yap_catlast-only89i_peak_955	chr1	53914726	53915093	+	207	NA	Intergenic	Intergenic	-9216	NR_002314	163742	Hs.99394	NR_002314	ENSG00000236253	SLC25A3P1	-	solute carrier family 25 member 3 pseudogene 1	pseudo	SLC25A3P1
Yap_catlast-only89i_peak_14059	chr2	18480797	18481120	+	207	NA	Intergenic	Intergenic	261001	NM_020905	57665	Hs.120319	NM_020905	ENSG00000240857	RDH14	PAN2|SDR7C4	retinol dehydrogenase 14 (all-trans/9-cis/11-cis)	protein-coding	RDH14
Yap_catlast-only89i_peak_15566	chr2	232276609	232276927	+	207	NA	Intergenic	CpG	16433	NM_145236	93010	Hs.299329	NM_145236	ENSG00000156966	B3GNT7	beta3GnT7	UDP-GlcNAc:betaGal beta-1,3-N-acetylglucosaminyltransferase 7	protein-coding	B3GNT7
Yap_catlast-only89i_peak_8147	chr13	75344610	75344847	+	207	NA	Intergenic	MLT1I|LTR|ERVL-MaLR	217748	NR_034024	338864	Hs.97408	NR_034024	ENSG00000236678	LINC00347	-	long intergenic non-protein coding RNA 347	ncRNA	LINC00347
Yap_catlast-only89i_peak_19341	chr4	3906054	3906339	+	206	NA	Intergenic	Intergenic	50959	NR_130742	348926	Hs.591720	NR_024253	ENSG00000251669	FAM86EP	-	family with sequence similarity 86, member A pseudogene	pseudo
Yap_catlast-only89i_peak_3178	chr10	62042613	62042922	+	206	NA	intron (NM_001204403, intron 2 of 43)	L2a|LINE|L2	106975	NM_020987	288	Hs.499725	NM_001149	ENSG00000151150	ANK3	ANKYRIN-G|MRT37	ankyrin 3	protein-coding
Yap_catlast-only89i_peak_1005	chr1	57298057	57298269	+	206	NA	Intergenic	Intergenic	-12794	NM_001004303	199920	Hs.437655	NM_001004303	ENSG00000187889	C1orf168	-	chromosome 1 open reading frame 168	protein-coding	C1orf168
Yap_catlast-only89i_peak_6796	chr12	53339731	53339992	+	206	NA	intron (NM_001256293, intron 1 of 8)	intron (NM_001256293, intron 1 of 8)	-2794	NM_199187	3875	Hs.406013	NM_000224	ENSG00000111057	KRT18	CK-18|CYK18|K18	keratin 18	protein-coding
Yap_catlast-only89i_peak_20733	chr5	34660678	34660980	+	206	NA	intron (NM_001145520, intron 1 of 17)	intron (NM_001145520, intron 1 of 17)	4233	NM_001145520	26064	Hs.431400	NM_015577	ENSG00000039560	RAI14	NORPEG|RAI13	retinoic acid induced 14	protein-coding
Yap_catlast-only89i_peak_19730	chr4	67430558	67430897	+	206	NA	Intergenic	Intergenic	288185	NR_031673	100302177		NR_031673	ENSG00000221563	MIR1269A	MIR1269|MIRN1269|hsa-mir-1269|hsa-mir-1269a	microRNA 1269a	ncRNA	MIR1269A
Yap_catlast-only89i_peak_13731	chr19	46272384	46272719	+	206	NA	promoter-TSS (NM_175875)	promoter-TSS (NM_175875)	-54	NM_175875	147912	Hs.43314	NM_175875	ENSG00000177045	SIX5	BOR2|DMAHP	SIX homeobox 5	protein-coding	SIX5
Yap_catlast-only89i_peak_15266	chr2	196977186	196977482	+	206	NA	Intergenic	Intergenic	-43798	NM_018897	56171	Hs.97403	NM_018897	ENSG00000118997	DNAH7	-	dynein axonemal heavy chain 7	protein-coding	DNAH7
Yap_catlast-only89i_peak_24621	chr7	55132680	55133037	+	206	NA	intron (NM_001346941, intron 1 of 21)	intron (NM_001346941, intron 1 of 21)	-44652	NM_001346900	1956	Hs.488293	NM_005228	ENSG00000146648	EGFR	ERBB|ERBB1|HER1|NISBD2|PIG61|mENA	epidermal growth factor receptor	protein-coding
Yap_catlast-only89i_peak_18473	chr3	126501521	126501850	+	206	NA	intron (NM_032343, intron 4 of 7)	intron (NM_032343, intron 4 of 7)	78622	NM_001320610	84303	Hs.518119	NM_032343	ENSG00000159685	CHCHD6	CHCM1|Mic25|PPP1R23	coiled-coil-helix-coiled-coil-helix domain containing 6	protein-coding
Yap_catlast-only89i_peak_24239	chr7	22617131	22617484	+	206	NA	Intergenic	Intergenic	14351	NR_038393	100506178	Hs.668122	NR_038393	ENSG00000232759	LOC100506178	-	uncharacterized LOC100506178	ncRNA	LOC100506178
Yap_catlast-only89i_peak_8360	chr13	114517301	114517632	+	206	NA	Intergenic	Intergenic	-1117	NR_044995	650669	Hs.369201	NM_001039799		GAS6-AS1	-	GAS6 antisense RNA 1	ncRNA
Yap_catlast-only89i_peak_20820	chr5	39427427	39427788	+	206	NA	Intergenic	Intergenic	-2272	NM_001244871	1601	Hs.696631	NM_001343	ENSG00000153071	DAB2	DOC-2|DOC2	DAB2, clathrin adaptor protein	protein-coding
Yap_catlast-only89i_peak_14777	chr2	112850316	112850631	+	206	NA	intron (NM_032824, intron 11 of 18)	intron (NM_032824, intron 11 of 18)	37673	NM_001329914	84910	Hs.656298	NM_032824	ENSG00000153214	TMEM87B	-	transmembrane protein 87B	protein-coding
Yap_catlast-only89i_peak_15368	chr2	206186084	206186389	+	206	NA	intron (NM_205863, intron 18 of 21)	intron (NM_205863, intron 18 of 21)	-360988	NM_201266	8828	Hs.471200	NM_003872	ENSG00000118257	NRP2	NP2|NPN2|PRO2714|VEGF165R2	neuropilin 2	protein-coding
Yap_catlast-only89i_peak_28378	chr9	137494441	137494784	+	206	NA	Intergenic	Intergenic	-39039	NM_001278074	1289	Hs.210283	NM_000093	ENSG00000130635	COL5A1	EDSC	collagen type V alpha 1 chain	protein-coding
Yap_catlast-only89i_peak_23396	chr6	105073399	105073818	+	205	NA	Intergenic	Intergenic	233813	NM_001321084	57531	Hs.434340	NM_020771	ENSG00000085382	HACE1	SPPRS	HECT domain and ankyrin repeat containing E3 ubiquitin protein ligase 1	protein-coding
Yap_catlast-only89i_peak_7220	chr12	89844770	89845127	+	205	NA	intron (NR_037659, intron 10 of 11)	intron (NR_037659, intron 10 of 11)	73635	NM_003774	8693	Hs.25130	NM_003774	ENSG00000257594	GALNT4	GALNAC-T4|GALNACT4	polypeptide N-acetylgalactosaminyltransferase 4	protein-coding	GALNT4
Yap_catlast-only89i_peak_27901	chr9	111798353	111798731	+	205	NA	exon (NM_032012, exon 16 of 18)	exon (NM_032012, exon 16 of 18)	10036	NR_029506	407036		NR_029506	ENSG00000207698	MIR32	MIRN32|hsa-mir-32|miR-32|miRNA32	microRNA 32	ncRNA	MIR32
Yap_catlast-only89i_peak_6496	chr12	25380184	25380340	+	205	NA	exon (NM_033360, exon 3 of 6)	exon (NM_033360, exon 3 of 6)	23603	NM_004985	3845	Hs.505033	NM_004985	ENSG00000133703	KRAS	C-K-RAS|CFC2|K-RAS2A|K-RAS2B|K-RAS4A|K-RAS4B|KI-RAS|KRAS1|KRAS2|NS|NS3|RALD|RASK2|c-Ki-ras2	KRAS proto-oncogene, GTPase	protein-coding	KRAS
Yap_catlast-only89i_peak_11137	chr17	1270127	1270264	+	205	NA	intron (NM_006761, intron 1 of 5)	AluSx|SINE|Alu	33361	NR_024058	7531	Hs.513851	NM_006761	ENSG00000108953	YWHAE	14-3-3E|HEL2|KCIP-1|MDCR|MDS	tyrosine 3-monooxygenase/tryptophan 5-monooxygenase activation protein epsilon	protein-coding
Yap_catlast-only89i_peak_6348	chr12	10787017	10787335	+	205	NA	exon (NM_018423, exon 3 of 11)	exon (NM_018423, exon 3 of 11)	-20968	NM_018048	55110	Hs.104650	NM_018048	ENSG00000111196	MAGOHB	MGN2|mago|magoh	mago homolog B, exon junction complex core component	protein-coding	MAGOHB
Yap_catlast-only89i_peak_13069	chr19	3968425	3969056	+	205	NA	intron (NM_001348, intron 2 of 8)	intron (NM_001348, intron 2 of 8)	2381	NM_001348	1613	Hs.631844	NM_001348	ENSG00000167657	DAPK3	DLK|ZIP|ZIPK	death associated protein kinase 3	protein-coding	DAPK3
Yap_catlast-only89i_peak_10161	chr16	4264199	4264470	+	205	NA	intron (NM_001323667, intron 1 of 6)	intron (NM_001323667, intron 1 of 6)	27747	NM_001098814	6345	Hs.10041	NM_001098814	ENSG00000185739	SRL	-	sarcalumenin	protein-coding	SRL
Yap_catlast-only89i_peak_23444	chr6	107780594	107780914	+	205	NA	promoter-TSS (NM_020381)	promoter-TSS (NM_020381)	25	NM_020381	57107	Hs.745008	NM_020381	ENSG00000164494	PDSS2	C6orf210|COQ10D3|DLP1|bA59I9.3|hDLP1	decaprenyl diphosphate synthase subunit 2	protein-coding	PDSS2
Yap_catlast-only89i_peak_18188	chr3	87007612	87008012	+	205	NA	intron (NM_016206, intron 3 of 3)	intron (NM_016206, intron 3 of 3)	32461	NM_001320493	389136	Hs.606507	NM_016206	ENSG00000206538	VGLL3	VGL-3|VGL3	vestigial like family member 3	protein-coding
Yap_catlast-only89i_peak_25041	chr7	100743166	100743686	+	205	NA	Intergenic	Intergenic	14706	NM_030961	81844	Hs.521092	NM_030961	ENSG00000169871	TRIM56	RNF109	tripartite motif containing 56	protein-coding	TRIM56
Yap_catlast-only89i_peak_519	chr1	27032234	27032633	+	205	NA	intron (NM_139135, intron 1 of 19)	intron (NM_139135, intron 1 of 19)	9911	NM_139135	8289	Hs.468972	NM_006015	ENSG00000117713	ARID1A	B120|BAF250|BAF250a|BM029|C1orf4|CSS2|ELD|MRD14|OSA1|P270|SMARCF1|hELD|hOSA1	AT-rich interaction domain 1A	protein-coding
Yap_catlast-only89i_peak_7710	chr12	125399328	125399712	+	205	NA	promoter-TSS (NM_021009)	promoter-TSS (NM_021009)	67	NM_021009	7316	Hs.520348	NM_021009	ENSG00000150991	UBC	HMG20	ubiquitin C	protein-coding	UBC
Yap_catlast-only89i_peak_11258	chr17	5419429	5419983	+	205	NA	intron (NM_014922, intron 14 of 15)	L3|LINE|CR1	-15387	NM_001162371	728392	Hs.104305	NM_001162371		LOC728392	-	uncharacterized LOC728392	protein-coding	LOC728392
Yap_catlast-only89i_peak_12351	chr17	78487930	78488173	+	205	NA	Intergenic	Intergenic	-30574	NM_020761	57521	Hs.133044	NM_020761	ENSG00000141564	RPTOR	KOG1|Mip1	regulatory associated protein of MTOR complex 1	protein-coding	RPTOR
Yap_catlast-only89i_peak_6783	chr12	52674666	52675137	+	204	NA	intron (NM_001320198, intron 2 of 10)	intron (NM_001320198, intron 2 of 10)	6472	NM_001320198	3892	Hs.278658	NM_002284	ENSG00000170442	KRT86	HB6|Hb1|K86|KRTHB1|KRTHB6|MNX	keratin 86	protein-coding
Yap_catlast-only89i_peak_9775	chr15	69707324	69707556	+	204	NA	promoter-TSS (NR_132969)	promoter-TSS (NR_132969)	-72	NR_132970	145694	Hs.147229	NR_132969	ENSG00000259426	LOC145694	-	uncharacterized LOC145694	ncRNA
Yap_catlast-only89i_peak_7893	chr13	32330498	32330886	+	204	NA	intron (NM_001166058, intron 1 of 16)	intron (NM_001166058, intron 1 of 16)	17013	NM_001166058	122042	Hs.680763	NM_130806	ENSG00000133105	RXFP2	GPR106|GREAT|INSL3R|LGR8|LGR8.1|RXFPR2	relaxin/insulin like family peptide receptor 2	protein-coding
Yap_catlast-only89i_peak_27985	chr9	114965847	114966171	+	204	NA	Intergenic	L1PA16|LINE|L1	-28432	NM_001282640	64420	Hs.494827	NM_022486	ENSG00000106868	SUSD1	-	sushi domain containing 1	protein-coding
Yap_catlast-only89i_peak_2594	chr10	6130659	6130998	+	204	NA	promoter-TSS (NM_032905)	promoter-TSS (NM_032905)	-121	NM_032905	84991	Hs.498548	NM_032905	ENSG00000134453	RBM17	SPF45	RNA binding motif protein 17	protein-coding	RBM17
Yap_catlast-only89i_peak_8348	chr13	111933042	111933346	+	204	NA	intron (NM_001330598, intron 13 of 16)	intron (NM_001330598, intron 13 of 16)	-35338	NM_001303133	121793	Hs.210677	NM_152324	ENSG00000153495	TEX29	C13orf16|bA474D23.1	testis expressed 29	protein-coding
Yap_catlast-only89i_peak_26937	chr8	128920023	128920610	+	204	NA	intron (NR_003367, intron 2 of 8)	intron (NR_003367, intron 2 of 8)	40653	NR_103558	641384	Hs.629674	NM_001037234	ENSG00000280055	TMEM75	-	transmembrane protein 75	ncRNA
Yap_catlast-only89i_peak_8059	chr13	49930362	49930679	+	204	NA	intron (NM_001079670, intron 6 of 10)	L3|LINE|CR1	45154	NM_030925	81617	Hs.87159	NM_030925	ENSG00000102547	CAB39L	MO25-BETA|MO2L|bA103J18.3	calcium binding protein 39 like	protein-coding	CAB39L
Yap_catlast-only89i_peak_23471	chr6	108885663	108885946	+	204	NA	intron (NM_001455, intron 1 of 2)	intron (NM_001455, intron 1 of 2)	3735	NM_001455	2309	Hs.220950	NM_001455	ENSG00000118689	FOXO3	AF6q21|FKHRL1|FKHRL1P2|FOXO2|FOXO3A	forkhead box O3	protein-coding	FOXO3
Yap_catlast-only89i_peak_20196	chr4	152337080	152337503	+	204	NA	intron (NM_001109977, intron 1 of 13)	intron (NM_001109977, intron 1 of 13)	6893	NM_001109977	729830	Hs.633810	NM_001109977	ENSG00000164142	FAM160A1	-	family with sequence similarity 160 member A1	protein-coding	FAM160A1
Yap_catlast-only89i_peak_17436	chr22	46943142	46943671	+	204	NA	Intergenic	Intergenic	-10339	NM_014246	9620	Hs.252387	NM_014246	ENSG00000075275	CELSR1	ADGRC1|CDHF9|FMI2|HFMI2|ME2	cadherin EGF LAG seven-pass G-type receptor 1	protein-coding	CELSR1
Yap_catlast-only89i_peak_19783	chr4	77703947	77704314	+	204	NA	3' UTR (NM_020859, exon 11 of 11)	3' UTR (NM_020859, exon 11 of 11)	114872	NM_001029870	345079	Hs.257292	NM_001029870	ENSG00000186212	SOWAHB	ANKRD56	sosondowah ankyrin repeat domain family member B	protein-coding	SOWAHB
Yap_catlast-only89i_peak_13489	chr19	34783360	34783779	+	204	NA	intron (NM_014686, intron 1 of 13)	AluSx|SINE|Alu	38113	NM_014686	9710	Hs.330073	NM_014686	ENSG00000166398	KIAA0355	-	KIAA0355	protein-coding	KIAA0355
Yap_catlast-only89i_peak_13039	chr19	2532583	2533000	+	204	NA	intron (NM_052847, intron 3 of 4)	L1ME2z|LINE|L1	56668	NM_015675	4616	Hs.110571	NM_015675	ENSG00000099860	GADD45B	GADD45BETA|MYD118	growth arrest and DNA damage inducible beta	protein-coding	GADD45B
Yap_catlast-only89i_peak_27114	chr8	143757494	143758076	+	204	NA	intron (NR_033343, intron 1 of 2)	intron (NR_033343, intron 1 of 2)	-4089	NM_005672	8000	Hs.652235	NM_005672	ENSG00000167653	PSCA	PRO232	prostate stem cell antigen	protein-coding	PSCA
Yap_catlast-only89i_peak_22675	chr6	30737446	30737719	+	204	NA	intron (NR_138037, intron 1 of 3)	intron (NR_138037, intron 1 of 3)	2980	NR_138037	105375013	Hs.348584	NR_138037	ENSG00000228022	HCG20	NCRNA00149	HLA complex group 20 (non-protein coding)	ncRNA
Yap_catlast-only89i_peak_14805	chr2	119426209	119426888	+	204	NA	Intergenic	Intergenic	-66006	NR_110272	101927709	Hs.274529	NR_110272		LOC101927709	-	uncharacterized LOC101927709	ncRNA	LOC101927709
Yap_catlast-only89i_peak_4200	chr10	127958753	127959089	+	204	NA	intron (NM_003474, intron 3 of 22)	intron (NM_003474, intron 3 of 22)	118206	NM_001288975	8038	Hs.594351	NM_003474	ENSG00000148848	ADAM12	ADAM12-OT1|CAR10|MCMP|MCMPMltna|MLTN|MLTNA	ADAM metallopeptidase domain 12	protein-coding
Yap_catlast-only89i_peak_27425	chr9	33779903	33780171	+	204	NA	intron (NM_001197098, intron 1 of 4)	L1PA16|LINE|L1	-15522	NM_002771	5646	Hs.654513	NM_002771	ENSG00000010438	PRSS3	MTG|PRSS4|T9|TRY3|TRY4	protease, serine 3	protein-coding	PRSS3
Yap_catlast-only89i_peak_9147	chr14	90989890	90990176	+	204	NA	Intergenic	Intergenic	-6480	NR_135274	105370619	Hs.525530	NR_135274		LOC105370619	-	uncharacterized LOC105370619	ncRNA
Yap_catlast-only89i_peak_11736	chr17	37856130	37856393	+	204	NA	promoter-TSS (NM_001289937)	promoter-TSS (NM_001289937)	30	NR_110535	2064	Hs.446352	NM_004448	ENSG00000141736	ERBB2	CD340|HER-2|HER-2/neu|HER2|MLN 19|NEU|NGL|TKR1	erb-b2 receptor tyrosine kinase 2	protein-coding
Yap_catlast-only89i_peak_9731	chr15	67289557	67289854	+	204	NA	intron (NR_135686, intron 2 of 5)	L1M4|LINE|L1	-40852	NR_135687	102723481	Hs.512978	NR_135687	ENSG00000259289	LOC102723481	-	uncharacterized LOC102723481	ncRNA
Yap_catlast-only89i_peak_23945	chr6	169473513	169473767	+	204	NA	Intergenic	Intergenic	5759	NR_134619	102724357	Hs.129310	NR_134619	ENSG00000234519	LOC102724357	-	uncharacterized LOC102724357	ncRNA
Yap_catlast-only89i_peak_18571	chr3	134046871	134047313	+	203	NA	Intergenic	MIRb|SINE|MIR	39612	NR_106885	102466744		NR_106885	ENSG00000277723	MIR6827	hsa-mir-6827	microRNA 6827	ncRNA	MIR6827
Yap_catlast-only89i_peak_1566	chr1	117051778	117052484	+	203	NA	Intergenic	L2a|LINE|L2	-30683	NR_125973	101929023	Hs.668091	NR_125972	ENSG00000233154	LINC01762	-	long intergenic non-protein coding RNA 1762	ncRNA
Yap_catlast-only89i_peak_26335	chr8	67429620	67430042	+	203	NA	3' UTR (NM_152765, exon 6 of 6)	3' UTR (NM_152765, exon 6 of 6)	24340	NM_152765	254778	Hs.268869	NM_152765	ENSG00000169085	C8orf46	-	chromosome 8 open reading frame 46	protein-coding	C8orf46
Yap_catlast-only89i_peak_5814	chr11	109930448	109930782	+	202	NA	Intergenic	L2c|LINE|L2	-33472	NM_033390	85463	Hs.376289	NM_033390	ENSG00000149289	ZC3H12C	MCPIP3	zinc finger CCCH-type containing 12C	protein-coding	ZC3H12C
Yap_catlast-only89i_peak_3250	chr10	65389161	65389677	+	202	NA	Intergenic	Intergenic	-107584	NM_001322258	221037	Hs.413416	NM_004241	ENSG00000171988	JMJD1C	KDM3C|TRIP-8|TRIP8	jumonji domain containing 1C	protein-coding
Yap_catlast-only89i_peak_5867	chr11	114165569	114166142	+	202	NA	promoter-TSS (NM_006169)	promoter-TSS (NM_006169)	-680	NM_006169	4837	Hs.503911	NM_006169	ENSG00000166741	NNMT	-	nicotinamide N-methyltransferase	protein-coding	NNMT
Yap_catlast-only89i_peak_19753	chr4	74527248	74527661	+	202	NA	Intergenic	Intergenic	-41106	NM_001270392	166824	Hs.529677	NM_177532	ENSG00000169435	RASSF6	-	Ras association domain family member 6	protein-coding
Yap_catlast-only89i_peak_12847	chr18	55853887	55854126	+	202	NA	intron (NM_001144964, intron 2 of 30)	MIRb|SINE|MIR	-8616	NM_001144970	23327	Hs.185677	NM_015277	ENSG00000049759	NEDD4L	NEDD4-2|NEDD4.2|PVNH7|RSP5|hNEDD4-2	neural precursor cell expressed, developmentally down-regulated 4-like, E3 ubiquitin protein ligase	protein-coding
Yap_catlast-only89i_peak_17210	chr22	36858120	36858514	+	202	NA	Intergenic	Intergenic	19370	NM_012473	25828	Hs.211929	NM_012473	ENSG00000100348	TXN2	COXPD29|MT-TRX|MTRX|TRX2	thioredoxin 2	protein-coding	TXN2
Yap_catlast-only89i_peak_26829	chr8	123701925	123702459	+	202	NA	intron (NR_126348, intron 2 of 3)	intron (NR_126348, intron 2 of 3)	4153	NR_126348	104266958	Hs.575540	NR_126348	ENSG00000253819	LINC01151	-	long intergenic non-protein coding RNA 1151	ncRNA	LINC01151
Yap_catlast-only89i_peak_11113	chr17	597399	597829	+	202	NA	intron (NM_001128159, intron 4 of 21)	intron (NM_001128159, intron 4 of 21)	20482	NM_001128159	55275	Hs.461819	NM_018289	ENSG00000141252	VPS53	HCCS1|PCH2E|hVps53L|pp13624	VPS53, GARP complex subunit	protein-coding
Yap_catlast-only89i_peak_6022	chr11	123056999	123057436	+	202	NA	intron (NM_024769, intron 1 of 6)	intron (NM_024769, intron 1 of 6)	8796	NM_024769	79827	Hs.591949	NM_024769	ENSG00000166250	CLMP	ACAM|ASAM|CSBM|CSBS	CXADR like membrane protein	protein-coding	CLMP
Yap_catlast-only89i_peak_27700	chr9	89115580	89115839	+	202	NA	Intergenic	L1MCa|LINE|L1	-146307	NM_001185059	79670	Hs.597057	NM_024617	ENSG00000083223	ZCCHC6	PAPD6|TUT7	zinc finger CCHC-type containing 6	protein-coding
Yap_catlast-only89i_peak_23896	chr6	158461569	158461785	+	202	NA	intron (NM_003898, intron 4 of 26)	intron (NM_003898, intron 4 of 26)	23597	NM_001178088	8871	Hs.434494	NM_003898	ENSG00000078269	SYNJ2	INPP5H	synaptojanin 2	protein-coding
Yap_catlast-only89i_peak_22302	chr6	3945643	3945954	+	202	NA	Intergenic	AluSg|SINE|Alu	-75771	NM_003913	8899	Hs.159014	NM_003913	ENSG00000112739	PRPF4B	PR4H|PRP4|PRP4H|PRP4K|dJ1013A10.1	pre-mRNA processing factor 4B	protein-coding	PRPF4B
Yap_catlast-only89i_peak_16719	chr21	35343897	35344479	+	202	NA	TTS (NR_038883)	TTS (NR_038883)	-4495	NR_134561	101928126	Hs.436879	NR_134561		LOC101928126	-	uncharacterized LOC101928126	ncRNA
Yap_catlast-only89i_peak_10353	chr16	24712287	24712744	+	202	NA	Intergenic	L3|LINE|CR1	-28534	NM_001330520	27327	Hs.655057	NM_014494	ENSG00000090905	TNRC6A	CAGH26|GW1|GW182|TNRC6	trinucleotide repeat containing 6A	protein-coding
Yap_catlast-only89i_peak_11394	chr17	14679489	14679724	+	202	NA	Intergenic	Intergenic	-238516	NR_135638	101928475	Hs.638944	NR_135638	ENSG00000232058	LOC101928475	-	uncharacterized LOC101928475	ncRNA
Yap_catlast-only89i_peak_8609	chr14	51771697	51771934	+	202	NA	Intergenic	Intergenic	-28296	NR_038358	283553	Hs.325752	NR_038358	ENSG00000258479	LINC00640	-	long intergenic non-protein coding RNA 640	ncRNA	LINC00640
Yap_catlast-only89i_peak_17090	chr22	30017976	30018577	+	202	NA	intron (NM_181831, intron 1 of 14)	intron (NM_181831, intron 1 of 14)	18731	NM_181832	4771	Hs.187898	NM_000268	ENSG00000186575	NF2	ACN|BANF|SCH	neurofibromin 2	protein-coding
Yap_catlast-only89i_peak_6259	chr12	5550698	5551007	+	202	NA	intron (NM_001102654, intron 1 of 1)	intron (NM_001102654, intron 1 of 1)	9572	NM_001102654	4908	Hs.99171	NM_002527	ENSG00000185652	NTF3	HDNF|NGF-2|NGF2|NT-3|NT3	neurotrophin 3	protein-coding
Yap_catlast-only89i_peak_24740	chr7	73556697	73557103	+	202	NA	Intergenic	AluSq2|SINE|Alu	-31806	NM_031992	7458	Hs.520943	NM_022170	ENSG00000106682	EIF4H	WBSCR1|WSCR1|eIF-4H	eukaryotic translation initiation factor 4H	protein-coding
Yap_catlast-only89i_peak_9723	chr15	67095535	67095919	+	202	NA	Intergenic	Intergenic	101053	NR_027654	4091	Hs.153863	NM_005585	ENSG00000137834	SMAD6	AOVD2|HsT17432|MADH6|MADH7	SMAD family member 6	protein-coding
Yap_catlast-only89i_peak_4392	chr11	8740902	8741492	+	202	NA	intron (NM_005418, intron 7 of 22)	intron (NM_005418, intron 7 of 22)	34211	NR_002977	677826	Hs.745552	NR_002977	ENSG00000212607	SNORA3B	ACA3-2|SNORA45|SNORA45B	small nucleolar RNA, H/ACA box 3B	snoRNA
Yap_catlast-only89i_peak_3381	chr10	74447994	74448140	+	202	NA	Intergenic	Intergenic	-3822	NR_073062	90550	Hs.591366	NM_138357	ENSG00000156026	MCU	C10orf42|CCDC109A|HsMCU	mitochondrial calcium uniporter	protein-coding
Yap_catlast-only89i_peak_25895	chr8	25893459	25893760	+	202	NA	intron (NM_022659, intron 5 of 15)	intron (NM_022659, intron 5 of 15)	9031	NM_022659	64641	Hs.491292	NM_022659	ENSG00000221818	EBF2	COE2|EBF-2|O/E-3|OE-3	early B-cell factor 2	protein-coding	EBF2
Yap_catlast-only89i_peak_26007	chr8	32191918	32192247	+	202	NA	intron (NM_013962, intron 1 of 4)	intron (NM_013962, intron 1 of 4)	-106180	NR_047475	100874286	Hs.147060	NR_047475	ENSG00000254049	NRG1-IT3	-	NRG1 intronic transcript 3	ncRNA	NRG1-IT3
Yap_catlast-only89i_peak_24839	chr7	80128592	80128978	+	202	NA	intron (NM_001102386, intron 1 of 7)	AluJb|SINE|Alu	12540	NM_001102386	346562	Hs.335049	NM_001102386	ENSG00000214415	GNAT3	GDCA	G protein subunit alpha transducin 3	protein-coding	GNAT3
Yap_catlast-only89i_peak_26330	chr8	67383492	67383909	+	202	NA	Intergenic	Intergenic	-21791	NM_152765	254778	Hs.268869	NM_152765	ENSG00000169085	C8orf46	-	chromosome 8 open reading frame 46	protein-coding	C8orf46
Yap_catlast-only89i_peak_16410	chr20	48782629	48783102	+	202	NA	Intergenic	Intergenic	-6242	NR_109943	101927541	Hs.570391	NR_109943	ENSG00000231742	LINC01273	-	long intergenic non-protein coding RNA 1273	ncRNA	LINC01273
[truncated: 5,363 more rows]
