# Supplementary material for: YAP-Mediated Recruitment of YY1 and EZH2 Represses Transcription of Key Cell-Cycle Regulators
Source: Oxford University Press journal article supplement (doi:10.1158/0008-5472.can-19-2415), 2020-05-14
Supplement: 00085472can192415-sup-226803_2_supp_6235361_q8v3y3.xlsx [file 00085472can192415-sup-226803_2_supp_6235361_q8v3y3.xlsx]

## Sheet: CDKN2a p21
Matrix ID	Name	Score	Relative score	Sequence ID	Start	End		Matrix ID	Name	Score	Relative score	Sequence ID	Start	End
MA0808.1	TEAD3	3.01017	0.838995	SEQ	77	84		MA0095.1	YY1	5.31509	0.843304	SEQ	112	117
MA0809.1	TEAD4	6.85217	0.866341	SEQ	76	85		MA0095.1	YY1	6.22486	0.889769	SEQ	166	171
MA0808.1	TEAD3	3.17704	0.841579	SEQ	121	128		MA0095.2	YY1	5.84857	0.809732	SEQ	163	174
MA0090.2	TEAD1	7.53461	0.877366	SEQ	120	129		MA0095.1	YY1	8.19127	0.990201	SEQ	379	384
MA0809.1	TEAD4	7.03733	0.870303	SEQ	120	129		MA0095.2	YY1	11.1241	0.886275	SEQ	376	387
MA0090.2	TEAD1	7.90714	0.885042	SEQ	162	171		MA0095.2	YY1	5.33382	0.802263	SEQ	413	424
MA0809.1	TEAD4	5.99658	0.848033	SEQ	162	171		MA0095.1	YY1	6.39962	0.898695	SEQ	632	637
MA0809.1	TEAD4	4.29926	0.811716	SEQ	237	246		MA0095.1	YY1	7.02748	0.930762	SEQ	755	760
MA0808.1	TEAD3	3.82584	0.851622	SEQ	319	326		MA0095.2	YY1	6.07491	0.813016	SEQ	752	763
MA0809.1	TEAD4	5.87533	0.845439	SEQ	318	327
MA1121.1	TEAD2	7.7278	0.805959	SEQ	317	329
MA0809.1	TEAD4	4.94464	0.825525	SEQ	410	419
MA0090.2	TEAD1	4.90516	0.823188	SEQ	410	419
MA1121.1	TEAD2	9.05631	0.836189	SEQ	408	420
MA0808.1	TEAD3	0.643462	0.802357	SEQ	421	428
MA0090.2	TEAD1	5.31483	0.831629	SEQ	420	429
MA0808.1	TEAD3	3.17704	0.841579	SEQ	438	445
MA0809.1	TEAD4	6.74088	0.863959	SEQ	437	446
MA0090.2	TEAD1	5.23515	0.829988	SEQ	437	446
MA0090.1	TEAD1	8.84451	0.815788	SEQ	435	446
MA0090.2	TEAD1	6.20856	0.850044	SEQ	601	610
MA0809.1	TEAD4	3.98271	0.804942	SEQ	601	610
MA0808.1	TEAD3	4.01983	0.854626	SEQ	832	839
MA0090.2	TEAD1	7.46161	0.875862	SEQ	831	840
MA0809.1	TEAD4	4.82326	0.822928	SEQ	831	840
MA0090.1	TEAD1	8.64221	0.810616	SEQ	831	842

## Sheet: CDKN2b p15
Matrix ID	Name	Score	Relative score	Sequence ID	Start	End		Matrix ID	Name	Score	Relative score	Sequence ID	Start	End
MA0808.1	TEAD3	0.779776	0.804467	seq	40	47		MA0095.1	YY1	6.22486	0.889769	seq	244	249
MA0809.1	TEAD4	5.9534	0.84711	seq	39	48		MA0095.1	YY1	6.22486	0.889769	seq	257	262
MA0090.2	TEAD1	5.30149	0.831354	seq	39	48		MA0095.2	YY1	6.33568	0.816799	seq	254	265
MA0808.1	TEAD3	5.58171	0.878805	seq	73	80		MA0095.1	YY1	7.02748	0.930762	seq	315	320
MA0809.1	TEAD4	4.66503	0.819542	seq	72	81		MA0095.2	YY1	5.47174	0.804264	seq	451	462
MA0090.2	TEAD1	4.1834	0.808317	seq	72	81
MA0809.1	TEAD4	6.16726	0.851685	seq	152	161
MA0090.2	TEAD1	5.93831	0.844476	seq	152	161
MA0808.1	TEAD3	0.863062	0.805757	seq	259	266
MA0090.2	TEAD1	4.52511	0.815358	seq	258	267
MA0809.1	TEAD4	5.19904	0.830968	seq	262	271
MA0090.2	TEAD1	5.05359	0.826247	seq	262	271
MA0808.1	TEAD3	1.13299	0.809935	seq	296	303
MA0090.2	TEAD1	4.06283	0.805833	seq	295	304
MA0808.1	TEAD3	0.779776	0.804467	seq	355	362
MA0809.1	TEAD4	5.16892	0.830324	seq	354	363
MA0808.1	TEAD3	0.779776	0.804467	seq	412	419
MA0809.1	TEAD4	6.58029	0.860523	seq	411	420
MA0808.1	TEAD3	0.863062	0.805757	seq	480	487
MA0809.1	TEAD4	4.85382	0.823582	seq	555	564
MA0808.1	TEAD3	9.09412	0.933179	seq	606	613
MA0090.2	TEAD1	9.65871	0.921131	seq	605	614
MA0809.1	TEAD4	9.27723	0.91823	seq	605	614
MA1121.1	TEAD2	10.0215	0.858152	seq	604	616
MA0808.1	TEAD3	12.2722	0.982377	seq	662	669
MA0809.1	TEAD4	10.6466	0.947531	seq	661	670
MA0090.2	TEAD1	9.95554	0.927247	seq	661	670
MA1121.1	TEAD2	11.4004	0.889527	seq	660	672
MA0090.1	TEAD1	10.1651	0.849549	seq	661	672
MA0808.1	TEAD3	8.72887	0.927525	seq	836	843
MA0809.1	TEAD4	9.10105	0.914461	seq	835	844
MA0090.2	TEAD1	7.96398	0.886213	seq	835	844
MA0809.1	TEAD4	8.47924	0.901155	seq	837	846
MA0090.2	TEAD1	6.76918	0.861595	seq	837	846
MA0808.1	TEAD3	3.82584	0.851622	seq	971	978
MA0809.1	TEAD4	5.91354	0.846257	seq	970	979

## Sheet: CDKN1c p57
Matrix ID	Name	Score	Relative score	Sequence ID	Start	End			Matrix ID	Name	Score	Relative score	Sequence ID	Start	End
MA0808.1	TEAD3	1.78948	0.820098	seq	280	287			MA0095.1	YY1	6.39962	0.898695	seq	102	107
MA0090.2	TEAD1	4.25049	0.8097	seq	279	288			MA0095.1	YY1	7.38865	0.949208	seq	120	125
MA0090.2	TEAD1	4.03045	0.805166	seq	600	609			MA0095.1	YY1	7.02748	0.930762	seq	210	215
MA0090.2	TEAD1	3.8232	0.800896	seq	614	623			MA0095.1	YY1	6.39962	0.898695	seq	364	369
MA0090.2	TEAD1	4.22269	0.809127	seq	700	709			MA0095.1	YY1	6.39962	0.898695	seq	618	623
MA0809.1	TEAD4	7.42279	0.87855	seq	880	889			MA0095.1	YY1	5.23583	0.839256	seq	799	804
MA0090.2	TEAD1	6.69608	0.860089	seq	880	889
MA0090.2	TEAD1	4.48716	0.814576	seq	887	896
MA0808.1	TEAD3	3.82584	0.851622	seq	965	972
MA0809.1	TEAD4	6.39499	0.856558	seq	964	973
MA0090.2	TEAD1	3.94124	0.803328	seq	964	973

## Sheet: CDKN2d p19
Table S7 - Motif analysis for TEAD and YY1 in CDKNI promoters
Matrix ID	Name	Score	Relative score	Sequence ID	Start	End				Matrix ID	Name	Score	Relative score	Sequence ID	Start	End
MA0808.1	TEAD3	2.5206	0.831416	seq	267	274				MA0095.1	YY1	7.21934	0.940561	seq	386	391
MA0809.1	TEAD4	5.08749	0.828581	seq	266	275				MA0095.1	YY1	7.02748	0.930762	seq	923	928
MA0090.2	TEAD1	5.39331	0.833246	seq	428	437				MA0095.1	YY1	7.21934	0.940561	seq	1387	1392
MA0809.1	TEAD4	4.08912	0.807219	seq	428	437				MA0095.1	YY1	7.02748	0.930762	seq	1505	1510
MA0090.2	TEAD1	3.78587	0.800126	seq	510	519				MA0095.2	YY1	10.3135	0.874514	seq	1502	1513
MA0808.1	TEAD3	3.66662	0.849158	seq	563	570				MA0095.1	YY1	7.21934	0.940561	seq	1602	1607
MA0809.1	TEAD4	7.85526	0.887804	seq	562	571				MA0095.2	YY1	5.45075	0.803959	seq	1599	1610
MA0090.2	TEAD1	4.61595	0.81723	seq	562	571
MA0809.1	TEAD4	3.77193	0.800432	seq	600	609
MA0808.1	TEAD3	4.31541	0.859201	seq	655	662
MA0809.1	TEAD4	8.49398	0.901471	seq	654	663
MA0090.2	TEAD1	6.08384	0.847474	seq	654	663
MA1121.1	TEAD2	8.80518	0.830474	seq	653	665
MA0090.2	TEAD1	5.84478	0.842549	seq	729	738
MA0090.2	TEAD1	4.25778	0.80985	seq	793	802
MA0809.1	TEAD4	3.99115	0.805123	seq	964	973
MA0090.2	TEAD1	4.43973	0.813599	seq	1185	1194
MA0808.1	TEAD3	9.38531	0.937687	seq	1264	1271
MA0809.1	TEAD4	10.1256	0.936383	seq	1263	1272
MA0090.2	TEAD1	8.91183	0.905742	seq	1263	1272
MA0090.1	TEAD1	9.78085	0.839725	seq	1263	1274
MA1121.1	TEAD2	8.46099	0.822643	seq	1262	1274
MA0090.2	TEAD1	4.71419	0.819254	seq	1598	1607
MA0808.1	TEAD3	3.82584	0.851622	seq	1655	1662
MA0090.2	TEAD1	4.81654	0.821362	seq	1654	1663
MA0809.1	TEAD4	4.08672	0.807168	seq	1654	1663
