# Supplementary material for: YAP-Mediated Recruitment of YY1 and EZH2 Represses Transcription of Key Cell-Cycle Regulators
Source: Oxford University Press journal article supplement (doi:10.1158/0008-5472.can-19-2415), 2020-05-14
Supplement: 00085472can192415-sup-226803_2_supp_6235362_q8vhyh.xlsx [file 00085472can192415-sup-226803_2_supp_6235362_q8vhyh.xlsx]

## Sheet: Table S5_Yap_Yy1_Ezh2_ann.txt
Table S6 - Peak annotations for YAP-YY1-Ezh2 enriched peaks
PeakID (cmd=annotatePeaks.pl ../Yap_Yy1_Ezh2_Peaks.bed hg19 -gene genes.fpkm_tracking -go Yap_Yy1_Ezh2_GO -annStats Yap_Yy1_Ezh2_annstats.txt)	Chr	Start	End	Strand	Peak Score	Focus Ratio/Region Size	Annotation	Detailed Annotation	Distance to TSS	Nearest PromoterID	Entrez ID	Nearest Unigene	Nearest Refseq	Nearest Ensembl	Gene Name	Gene Alias	Gene Description	Gene Type	tracking_id	class_code	nearest_ref_id	gene_id	gene_short_name	tss_id	locus	length	coverage	WT_low_FPKM	WT_low_conf_lo	WT_low_conf_hi	WT_low_status	WT_high_FPKM	WT_high_conf_lo	WT_high_conf_hi	WT_high_status	YapKO_low_FPKM	YapKO_low_conf_lo	YapKO_low_conf_hi	YapKO_low_status	YapKO_high_FPKM	YapKO_high_conf_lo	YapKO_high_conf_hi	YapKO_high_status	5SA_low_FPKM	5SA_low_conf_lo	5SA_low_conf_hi	5SA_low_status	5SA_high_FPKM	5SA_high_conf_lo
6712	chr6	85668039	85669038	+	0	NA	Intergenic	THE1B-int|LTR|ERVL-MaLR	-194584	NM_001080508	9096	Hs.251830	NM_001080508	ENSG00000112837	TBX18	CAKUT2	T-box 18	protein-coding	TBX18	-	-	TBX18	TBX18	TSS13528	chr6:85442215-85473954	-	-	4.00226	3.15654	4.84797	OK	4.45477	3.51614	5.39341	OK	5.34699	4.24192	6.45206	OK	4.49755	3.55329	5.4418	OK	4.71914	3.74189	5.69638	OK	4.68139	3.71157
1801	chr2	96917132	96918131	+	0	NA	3' UTR (NM_001193304, exon 4 of 4)	3' UTR (NM_001193304, exon 4 of 4)	14120	NM_017849	55654	Hs.164303	NM_017849	ENSG00000135956	TMEM127	-	transmembrane protein 127	protein-coding	TMEM127	-	-	TMEM127	TMEM127	TSS18789	chr2:96915945-96931751	-	-	26.3905	21.7982	30.9827	OK	28.489	23.6209	33.3572	OK	17.7011	14.5051	20.8971	OK	13.9426	11.3448	16.5404	OK	24.5823	20.302	28.8625	OK	25.6676	21.1932
5006	chr12	80420645	80421644	+	0	NA	Intergenic	L1MA9|LINE|L1	-91909	NM_001244990	4659	Hs.49582	NM_002480	ENSG00000058272	PPP1R12A	M130|MBS|MYPT1	protein phosphatase 1 regulatory subunit 12A	protein-coding
3074	chr7	97983630	97984629	+	0	NA	intron (NM_018842, intron 3 of 13)	intron (NM_018842, intron 3 of 13)	46298	NM_018842	55971	Hs.656063	NM_018842	ENSG00000006453	BAIAP2L1	IRTKS	BAI1 associated protein 2 like 1	protein-coding	BAIAP2L1	-	-	BAIAP2L1	BAIAP2L1	TSS31809	chr7:97910978-98030427	-	-	3.49896	2.3544	4.64352	OK	2.75946	1.28696	4.23196	OK	1.52907	0.981448	2.0767	OK	2.72064	1.77352	3.66775	OK	4.12411	2.77419	5.47403	OK	2.8993	1.91857
3509	chr7	7301802	7302801	+	0	NA	intron (NR_108073, intron 2 of 3)	intron (NR_108073, intron 2 of 3)	7516	NR_108073	101927354	Hs.520664	NR_108073		LOC101927354	-	uncharacterized LOC101927354	ncRNA	LOC101927354	-	-	LOC101927354	LOC101927354	TSS23745	chr7:7294784-7317700	-	-	0.0331634	0	0.217035	OK	0.110125	0	0.33837	OK	0.225077	0	0.60271	OK	0.271717	0	0.696955	OK	0.138502	0	0.443078	OK	0.0412269	0
4863	chr17	79479097	79480096	+	0	NA	intron (NM_001614, intron 1 of 5)	CpG-11343	296	NR_037688	71	Hs.514581	NM_001614	ENSG00000184009	ACTG1	ACT|ACTG|BRWS2|DFNA20|DFNA26|HEL-176	actin gamma 1	protein-coding
3163	chr11	763538	764537	+	0	NA	intron (NM_006755, intron 6 of 7)	intron (NM_006755, intron 6 of 7)	13465	NM_001318821	347862	Hs.218362	NM_182612	ENSG00000177225	PDDC1	-	Parkinson disease 7 domain containing 1	protein-coding
1178	chr10	70166483	70167482	+	0	NA	promoter-TSS (NR_103476)	promoter-TSS (NR_103476)	-36	NM_017987	55680	Hs.653144	NM_017987	ENSG00000204130	RUFY2	RABIP4R|ZFYVE13	RUN and FYVE domain containing 2	protein-coding	RUFY2	-	-	RUFY2	RUFY2	TSS1364,TSS31446	chr10:70042416-70167051	-	-	6.83884	3.45594	10.2217	OK	7.31693	3.68393	10.9499	OK	7.50302	3.73254	11.2735	OK	7.88693	3.92906	11.8448	OK	8.14257	4.26378	12.0214	OK	7.12142	4.12358
4628	chr19	14116236	14117751	+	0	NA	5' UTR (NM_002918, exon 1 of 21)	5' UTR (NM_002918, exon 1 of 21)	141	NM_002918	5989	Hs.655215	NM_002918	ENSG00000132005	RFX1	EFC|RFX	regulatory factor X1	protein-coding	RFX1	-	-	RFX1	RFX1	TSS26852	chr19:14072341-14117134	-	-	0.225898	0.0749268	0.376868	OK	0.286236	0.120831	0.45164	OK	0.220929	0.0855898	0.356268	OK	0.372585	0.182987	0.562183	OK	0.22858	0.0818397	0.37532	OK	0.355669	0.168273
6459	chr12	6165611	6166610	+	0	NA	exon (NM_000552, exon 15 of 52)	exon (NM_000552, exon 15 of 52)	67731	NM_000552	7450	Hs.440848	NM_000552	ENSG00000110799	VWF	F8VWF|VWD	von Willebrand factor	protein-coding	VWF	-	-	VWF	VWF	TSS24990	chr12:6058039-6233836	-	-	0.0355787	0.00100449	0.070153	OK	0.0233642	0	0.0504861	OK	0.0186745	0	0.0436056	OK	0	0	0	OK	0.00918763	0	0.0316902	OK	0.0274192	0
1387	chr1	11967921	11968920	+	0	NA	Intergenic	Intergenic	18065	NM_138346	90231	Hs.520094	NM_138346	ENSG00000116685	KIAA2013	-	KIAA2013	protein-coding	KIAA2013	-	-	KIAA2013	KIAA2013	TSS5580	chr1:11979644-11986485	-	-	10.2699	7.983	12.5567	OK	10.5845	8.22676	12.9423	OK	2.59367	1.82545	3.36188	OK	2.92794	2.08228	3.77361	OK	3.97096	2.8856	5.05632	OK	3.82755	2.78337
1932	chr17	44852501	44853500	+	0	NA	intron (NM_030753, intron 1 of 4)	AluY|SINE|Alu	43126	NM_030753	7473	Hs.445884	NM_030753	ENSG00000108379	WNT3	INT4|TETAMS	Wnt family member 3	protein-coding	WNT3	-	-	WNT3	WNT3	TSS11774	chr17:44839871-44896126	-	-	1.42361	0.948825	1.89839	OK	1.0295	0.649401	1.40959	OK	0.331434	0.141344	0.521525	OK	0.671124	0.379864	0.962384	OK	1.19929	0.779584	1.61899	OK	1.00066	0.62794
458	chr6	136914816	136915815	+	0	NA	intron (NM_005923, intron 21 of 29)	intron (NM_005923, intron 21 of 29)	-34937	NR_125858	101928461	Hs.666518	NR_125858		LOC101928461	-	uncharacterized LOC101928461	ncRNA	LOC101928461	-	-	LOC101928461	LOC101928461	TSS2910	chr6:136878186-137113656	-	-	0.0717512	0	0.427689	OK	0.0737455	0	0.427314	OK	0.0354063	0	0.293815	OK	0.100572	0	0.493819	OK	0	0	0	OK	0.111681	0
2634	chr1	157549678	157550677	+	0	NA	intron (NM_031282, intron 7 of 11)	intron (NM_031282, intron 7 of 11)	17693	NM_031282	83417	Hs.120260	NM_031282	ENSG00000163518	FCRL4	CD307d|FCRH4|IGFP2|IRTA1	Fc receptor like 4	protein-coding	FCRL4	-	-	FCRL4	FCRL4	TSS10843	chr1:157543538-157567870	-	-	0	0	0	OK	0	0	0	OK	0	0	0	OK	0	0	0	OK	0	0	0	OK	0	0
1785	chr8	144717985	144718984	+	0	NA	5' UTR (NM_001082480, exon 1 of 2)	5' UTR (NM_001082480, exon 1 of 2)	152	NM_001082480	9831	Hs.43133	NM_014789	ENSG00000183309	ZNF623	-	zinc finger protein 623	protein-coding
4361	chr2	85132340	85133339	+	0	NA	promoter-TSS (NM_021103)	promoter-TSS (NM_021103)	76	NM_021103	9168	Hs.446574	NM_021103	ENSG00000034510	TMSB10	MIG12|TB10	thymosin beta 10	protein-coding	TMSB10	-	-	TMSB10	TMSB10	TSS29176	chr2:85132762-85133799	-	-	1238.59	1035.17	1442.01	OK	1647.3	1379.51	1915.1	OK	1429.41	1197.87	1660.95	OK	1830.3	1536.18	2124.42	OK	1326.77	1110.91	1542.63	OK	1700.06	1424.88
5521	chr20	42471990	42472989	+	0	NA	Intergenic	L2a|LINE|L2	-50869	NR_134577	105372626	Hs.130555	NR_134577	ENSG00000233277	LINC01728	-	long intergenic non-protein coding RNA 1728	ncRNA
5499	chr7	65515701	65516700	+	0	NA	Intergenic	AluJo|SINE|Alu	-24576	NM_000048	435	Hs.632015	NM_000048	ENSG00000126522	ASL	ASAL	argininosuccinate lyase	protein-coding	ASL	-	-	ASL	ASL	TSS19233,TSS9145	chr7:65540775-65558329	-	-	26.4805	21.2896	31.6715	OK	25.4035	20.4801	30.3268	OK	20.0698	16.0168	24.1228	OK	17.7387	14.0561	21.4213	OK	32.3961	26.2844	38.5078	OK	25.7678	20.7876
1250	chr1	169926962	169927961	+	0	NA	intron (NM_001204514, intron 19 of 20)	AluJr|SINE|Alu	-64361	NM_020423	57147	Hs.435560	NM_020423	ENSG00000000457	SCYL3	PACE-1|PACE1	SCY1 like pseudokinase 3	protein-coding	SCYL3	-	-	SCYL3	SCYL3	TSS14899	chr1:169764549-169863100	-	-	2.14701	1.10677	3.18725	OK	3.01173	1.60461	4.41886	OK	3.07757	1.80251	4.35263	OK	3.06931	1.47635	4.66227	OK	2.30619	1.28374	3.32863	OK	2.36373	1.38369
2507	chr4	77905695	77906694	+	0	NA	intron (NM_018243, intron 1 of 9)	intron (NM_018243, intron 1 of 9)	35327	NM_018243	55752	Hs.128199	NM_018243	ENSG00000138758	2018-09-11	-	septin 11	protein-coding	2018-09-11	-	-	2018-09-11	2018-09-11	TSS9294	chr4:77870866-77959768	-	-	49.4108	41.3788	57.4428	OK	42.2985	35.344	49.253	OK	37.7297	31.4298	44.0296	OK	34.6816	28.9135	40.4497	OK	48.4239	40.5426	56.3052	OK	24.1658	20.0538
6642	chr20	62715017	62716016	+	0	NA	promoter-TSS (NM_001200019)	promoter-TSS (NM_001200019)	196	NM_001007125	198437	Hs.570316	NM_001007125	ENSG00000171695	LKAAEAR1	C20orf201	LKAAEAR motif containing 1	protein-coding	LKAAEAR1	-	-	LKAAEAR1	LKAAEAR1	TSS30103	chr20:62711470-62731996	-	-	0.0625848	0	0.328886	OK	0.118681	0	0.367088	OK	0	0	0	OK	0.467143	0	1.20427	OK	0.126824	0	0.477436	OK	0	0
5810	chr15	91630924	91631923	+	0	NA	Intergenic	Intergenic	-11395	NM_001323031	9899	Hs.21754	NM_014848	ENSG00000185518	SV2B	HsT19680	synaptic vesicle glycoprotein 2B	protein-coding
4893	chr12	58158603	58159602	+	0	NA	exon (NM_000785, exon 3 of 9)	exon (NM_000785, exon 3 of 9)	1874	NM_000785	1594	Hs.524528	NM_000785	ENSG00000111012	CYP27B1	CP2B|CYP1|CYP1alpha|CYP27B|P450c1|PDDR|VDD1|VDDR|VDDRI|VDR	cytochrome P450 family 27 subfamily B member 1	protein-coding	CYP27B1	-	-	CYP27B1	CYP27B1	TSS18510	chr12:58156116-58160976	-	-	0.357715	0.123219	0.592211	OK	0.249872	0.0606429	0.439101	OK	0.146322	0.00490396	0.287741	OK	0.075208	0	0.188594	OK	0.322063	0.107085	0.537042	OK	1.31074	0.80836
3957	chr1	41950972	41951971	+	0	NA	Intergenic	Intergenic	-1117	NM_001956	1907	Hs.1407	NM_001956	ENSG00000127129	EDN2	ET-2|ET2|PPET2	endothelin 2	protein-coding	EDN2	-	-	EDN2	EDN2	TSS4775	chr1:41944445-41950354	-	-	0	0	0	OK	0	0	0	OK	0	0	0	OK	0	0	0	OK	0	0	0	OK	0	0
1630	chr15	42836099	42837098	+	0	NA	intron (NM_153260, intron 5 of 5)	AluJo|SINE|Alu	4404	NM_153260	255252	Hs.234681	NM_153260	ENSG00000180979	LRRC57	-	leucine rich repeat containing 57	protein-coding	LRRC57	-	-	LRRC57	LRRC57	TSS16232	chr15:42834719-42841002	-	-	6.816	5.22001	8.41198	OK	6.4339	4.90418	7.96363	OK	4.87657	3.63733	6.11582	OK	5.4873	4.14013	6.83447	OK	6.8264	5.22899	8.4238	OK	6.13281	4.66755
3497	chr3	129033643	129034642	+	0	NA	promoter-TSS (NR_026991)	promoter-TSS (NR_026991)	-972	NR_026991	339942	Hs.450096	NM_001025468		H1FX-AS1	C3orf47	H1FX antisense RNA 1	ncRNA
6531	chr16	85586524	85587523	+	0	NA	Intergenic	CpG	-58006	NM_001134473	23199	Hs.461647	NM_014615	ENSG00000131149	GSE1	CRHSP24|KIAA0182	Gse1 coiled-coil protein	protein-coding
4340	chr7	5634470	5635469	+	0	NA	intron (NM_003088, intron 1 of 4)	MIR3|SINE|MIR	2533	NM_003088	6624	Hs.118400	NM_003088	ENSG00000075618	FSCN1	FAN1|HSN|SNL|p55	fascin actin-bundling protein 1	protein-coding	FSCN1	-	-	FSCN1	FSCN1	TSS15887	chr7:5632435-5646287	-	-	45.7525	37.3778	54.1272	OK	25.2557	20.4248	30.0866	OK	40.5466	33.301	47.7922	OK	22.4584	18.1005	26.8163	OK	60.9278	50.3926	71.463	OK	25.8695	20.9134
3185	chr1	155931292	155932291	+	0	NA	intron (NM_004723, intron 10 of 21)	intron (NM_004723, intron 10 of 21)	-10664	NR_106796	102465442		NR_106796	ENSG00000277817	MIR6738	hsa-mir-6738	microRNA 6738	ncRNA	MIR6738	-	-	MIR6738	MIR6738	TSS3423	chr1:155916629-155948336	-	-	0	0	0	OK	0	0	0	OK	0	0	0	OK	0	0	0	OK	0	0	0	OK	0	0
3109	chr8	14398353	14399352	+	0	NA	intron (NM_001322881, intron 2 of 6)	L1PA8|LINE|L1	312167	NR_029875	494332		NR_029875	ENSG00000199127	MIR383	MIRN383|hsa-mir-383|mir-383	microRNA 383	ncRNA	MIR383	-	-	MIR383	MIR383	TSS14787	chr8:13947372-15095792	-	-	0	0	0	OK	0	0	0	OK	0	0	0	OK	0	0	0	OK	0	0	0	OK	0	0
3919	chr18	309182	310181	+	0	NA	Intergenic	L1PA15|LINE|L1	-41622	NM_005131	9984	Hs.712543	NM_005131	ENSG00000079134	THOC1	HPR1|P84|P84N5	THO complex 1	protein-coding	THOC1	-	-	THOC1	THOC1	TSS29953	chr18:214519-268059	-	-	17.86	14.2888	21.4311	OK	17.53	13.9849	21.0751	OK	21.9577	17.6512	26.2642	OK	27.8654	22.6372	33.0936	OK	13.6286	10.7691	16.4881	OK	11.0267	8.61891
728	chr14	65307580	65308579	+	0	NA	Intergenic	Intergenic	-18213	NM_001024858	6710	Hs.417303	NM_000347	ENSG00000070182	SPTB	EL3|HS2|HSPTB1|SPH2	spectrin beta, erythrocytic	protein-coding
1244	chr6	44190937	44191936	+	0	NA	promoter-TSS (NM_001078177)	promoter-TSS (NM_001078177)	73	NM_001078177	2030	Hs.25450	NM_004955	ENSG00000112759	SLC29A1	ENT1	solute carrier family 29 member 1 (Augustine blood group)	protein-coding
1638	chr12	11801449	11802448	+	0	NA	promoter-TSS (NM_001987)	promoter-TSS (NM_001987)	-840	NM_001987	2120	Hs.504765	NM_001987	ENSG00000139083	ETV6	TEL|TEL/ABL|THC5	ETS variant 6	protein-coding	ETV6	-	-	ETV6	ETV6	TSS8803	chr12:11802787-12079107	-	-	4.19145	3.3015	5.0814	OK	4.4012	3.46684	5.33555	OK	2.55895	1.95282	3.16507	OK	3.82664	2.99818	4.65511	OK	6.91049	5.55698	8.26399	OK	5.50637	4.38835
5060	chr8	121121544	121122543	+	0	NA	Intergenic	AluSg|SINE|Alu	-15304	NM_021110	7373	Hs.409662	NM_021110	ENSG00000187955	COL14A1	UND	collagen type XIV alpha 1 chain	protein-coding	COL14A1	-	-	COL14A1	COL14A1	TSS3234	chr8:121137346-121384273	-	-	5.20571	4.15985	6.25157	OK	1.58202	1.17884	1.98521	OK	27.9803	23.314	32.6467	OK	5.23903	4.18865	6.28941	OK	2.24376	1.71172	2.7758	OK	3.06824	2.39379
3936	chr7	44983394	44984393	+	0	NA	Intergenic	AluJr|SINE|Alu	34811	NM_033054	64005	Hs.37617	NM_033054	ENSG00000136286	MYO1G	HA2|HLA-HA2|MHAG	myosin IG	protein-coding	MYO1G	-	-	MYO1G	MYO1G	TSS23448	chr7:45002259-45018704	-	-	0	0	0	OK	0	0	0	OK	0	0	0	OK	0	0	0	OK	0	0	0	OK	0	0
29	chr17	7118290	7119289	+	0	NA	intron (NR_135527, intron 3 of 20)	intron (NR_135527, intron 3 of 20)	-1655	NM_001270447	37	Hs.437178	NM_000018	ENSG00000072778	ACADVL	ACAD6|LCACD|VLCAD	acyl-CoA dehydrogenase, very long chain	protein-coding
5831	chrX	109918915	109919914	+	0	NA	3' UTR (NM_001143982, exon 12 of 12)	3' UTR (NM_001143982, exon 12 of 12)	119662	NM_145234	91851	Hs.496587	NM_145234	ENSG00000101938	CHRDL1	CHL|MGC1|MGCN|NRLN1|VOPT|dA141H5.1	chordin like 1	protein-coding	CHRDL1	-	-	CHRDL1	CHRDL1	TSS20847,TSS4142	chrX:109917083-110039286	-	-	7.01689	5.5672	8.46658	OK	3.23719	2.44285	4.03153	OK	0	0	0	OK	0.634137	0.382572	0.885702	OK	0.377674	0.191068	0.56428	OK	0.431044	0.232112
6541	chr17	1132123	1133122	+	0	NA	exon (NM_001322841, exon 1 of 23)	exon (NM_001322841, exon 1 of 23)	352	NM_001322842	29	Hs.159306	NM_001092	ENSG00000159842	ABR	MDB	active BCR-related	protein-coding
350	chr20	1874822	1876611	+	0	NA	promoter-TSS (NM_001040023)	promoter-TSS (NM_001040023)	-110	NM_001040023	140885	Hs.581021	NM_080792	ENSG00000198053	SIRPA	BIT|CD172A|MFR|MYD-1|P84|PTPNS1|SHPS1|SIRP	signal regulatory protein alpha	protein-coding
4087	chr16	31212886	31213885	+	0	NA	intron (NR_102400, intron 1 of 1)	(CCCTG)n|Simple_repeat|Simple_repeat	179	NR_102400	100652740	Hs.550659	NR_102400	ENSG00000261359	PYCARD-AS1	C16orf98|PYCARDOS	PYCARD antisense RNA 1	ncRNA	PYCARD-AS1	-	-	PYCARD-AS1	PYCARD-AS1	TSS8527	chr16:31212806-31214773	-	-	0.0410606	0	0.273586	OK	6.34e-60	0	0.217323	OK	0.0357167	0	0.174136	OK	0.037176	0	0.175655	OK	7.46e-20	0	0.210831	OK	0.0461861	0
1969	chr6	145031036	145032035	+	0	NA	intron (NM_007124, intron 52 of 73)	intron (NM_007124, intron 52 of 73)	304744	NR_132778	106635530		NR_132778		SNORA98	-	small nucleolar RNA, H/ACA box 98	snoRNA
6233	chr19	4692515	4693514	+	0	NA	intron (NM_139159, intron 13 of 21)	intron (NM_139159, intron 13 of 21)	13720	NM_001242901	100131094	Hs.678135	NM_001242901		DPP9-AS1	-	DPP9 antisense RNA 1	protein-coding	DPP9-AS1	-	-	DPP9-AS1	DPP9-AS1	TSS9599	chr19:4675243-4723855	-	-	0.102494	0	0.507602	OK	0.107048	0	0.495322	OK	0.156203	0	0.574812	OK	0.151816	0	0.618248	OK	0.101865	0	0.472197	OK	0.114668	0
1810	chr3	134046687	134047686	+	0	NA	Intergenic	Intergenic	39518	NR_106885	102466744		NR_106885	ENSG00000277723	MIR6827	hsa-mir-6827	microRNA 6827	ncRNA	MIR6827	-	-	MIR6827	MIR6827	TSS12553	chr3:134074186-134094259	-	-	0	0	0	OK	0	0	0	OK	0	0	0	OK	0	0	0	OK	0	0	0	OK	0	0
2203	chr17	76355670	76357112	+	0	NA	promoter-TSS (NR_110845)	promoter-TSS (NR_110845)	-138	NR_110847	101928674	Hs.637297	NR_110845	ENSG00000266970	LOC101928674	-	uncharacterized LOC101928674	ncRNA
6358	chr3	104464005	104465004	+	0	NA	Intergenic	MLT1A|LTR|ERVL-MaLR	-518399	NR_030330	693127		NR_030330	ENSG00000208032	MIR548A3	MIRN548A3	microRNA 548a-3	ncRNA	MIR548A3	-	-	MIR548A3	MIR548A3	TSS21588	chr3:103903475-103946105	-	-	0	0	0	OK	0	0	0	OK	0	0	0	OK	0	0	0	OK	0	0	0	OK	0	0
4358	chr21	46347569	46348568	+	0	NA	non-coding (NR_038311, exon 5 of 5)	non-coding (NR_038311, exon 5 of 5)	720	NM_001127491	3689	Hs.375957	NM_000211	ENSG00000160255	ITGB2	CD18|LAD|LCAMB|LFA-1|MAC-1|MF17|MFI7	integrin subunit beta 2	protein-coding
2754	chr10	134583314	134584313	+	0	NA	intron (NM_005539, intron 12 of 15)	intron (NM_005539, intron 12 of 15)	15724	NM_177400	84504	Hs.134013	NM_177400	ENSG00000148826	NKX6-2	GTX|NKX6.2|NKX6B	NK6 homeobox 2	protein-coding	NKX6-2	-	-	NKX6-2	NKX6-2	TSS17301	chr10:134598319-134599537	-	-	0	0	0	OK	0	0	0	OK	0	0	0	OK	0	0	0	OK	0	0	0	OK	0	0
1546	chr1	64196509	64197508	+	0	NA	Intergenic	Intergenic	-42682	NM_005012	4919	Hs.128753	NM_005012	ENSG00000185483	ROR1	NTRKR1|dJ537F10.1	receptor tyrosine kinase like orphan receptor 1	protein-coding	ROR1	-	-	ROR1	ROR1	TSS22228	chr1:64239689-64647179	-	-	23.1382	16.2953	29.981	OK	15.1769	10.952	19.4017	OK	11.5299	8.49737	14.5624	OK	5.06358	3.72597	6.4012	OK	18.2634	14.1401	22.3867	OK	8.98013	6.61284
2994	chr20	44935813	44936812	+	0	NA	intron (NM_021248, intron 1 of 11)	CpG	825	NM_021248	64405	Hs.472861	NM_021248	ENSG00000149654	CDH22	C20orf25|dJ998H6.1	cadherin 22	protein-coding	CDH22	-	-	CDH22	CDH22	TSS14569	chr20:44802371-44937137	-	-	0	0	0	OK	0	0	0	OK	0	0	0	OK	0	0	0	OK	0	0	0	OK	0.00893316	0
6587	chr19	246156	247155	+	0	NA	Intergenic	TAR1|Satellite|telo	-44446	NR_028324	399844	Hs.356758	NM_001004321		LINC01002	-	long intergenic non-protein coding RNA 1002	ncRNA
4003	chrX	40922785	40923784	+	0	NA	Intergenic	AluSg|SINE|Alu	-21604	NM_001039590	8239	Hs.77578	NM_004652	ENSG00000124486	USP9X	DFFRX|FAF|FAM|MRX99|MRXS99F	ubiquitin specific peptidase 9, X-linked	protein-coding
3256	chr13	113863642	113864641	+	0	NA	promoter-TSS (NM_001127202)	promoter-TSS (NM_001127202)	322	NM_001008895	8451	Hs.339735	NM_003589	ENSG00000139842	CUL4A	-	cullin 4A	protein-coding
311	chr6	83571942	83572941	+	0	NA	Intergenic	ERVL-E-int|LTR|ERVL	203119	NM_001304437	90025	Hs.148609	NM_198920	ENSG00000118420	UBE3D	C6orf157|H10BH|UBE2CBP|YJR141W	ubiquitin protein ligase E3D	protein-coding
4537	chrX	16044524	16045523	+	0	NA	Intergenic	AluSx|SINE|Alu	-96401	NM_005314	2925	Hs.567282	NM_005314	ENSG00000126010	GRPR	BB2|BB2R	gastrin releasing peptide receptor	protein-coding	GRPR	-	-	GRPR	GRPR	TSS10670	chrX:16141423-16171641	-	-	0.913489	0.55186	1.27512	OK	0.189541	0.0407296	0.338353	OK	0.0960741	0	0.202631	OK	0.124234	0.010306	0.238163	OK	1.12573	0.710048	1.54141	OK	0.522789	0.267442
4836	chr20	62496244	62497795	+	0	NA	intron (NM_001243892, intron 1 of 5)	CpG	438	NM_001243892	7165	Hs.473296	NM_003288	ENSG00000101150	TPD52L2	D54|TPD54	tumor protein D52 like 2	protein-coding
3844	chr1	230220079	230221078	+	0	NA	intron (NM_004481, intron 1 of 15)	intron (NM_004481, intron 1 of 15)	17636	NM_004481	2590	Hs.743964	NM_004481	ENSG00000143641	GALNT2	GalNAc-T2	polypeptide N-acetylgalactosaminyltransferase 2	protein-coding	GALNT2	-	-	GALNT2	GALNT2	TSS22346,TSS9482	chr1:230193535-230417876	-	-	39.2319	32.1596	46.3041	OK	44.2532	36.6427	51.8637	OK	40.493	33.6175	47.3686	OK	40.8119	33.0852	48.5387	OK	37.4591	30.693	44.2251	OK	41.2602	33.7649
825	chr12	113632353	113633352	+	0	NA	TTS (NM_138451)	TTS (NM_138451)	9521	NM_032848	84934	Hs.524762	NM_032848	ENSG00000139405	RITA1	C12orf52|RITA	RBPJ interacting and tubulin associated 1	protein-coding	RITA1	-	-	RITA1	RITA1	TSS11527	chr12:113623330-113630173	-	-	28.7887	23.1824	34.395	OK	36.152	29.4545	42.8495	OK	26.7305	21.5729	31.8881	OK	30.542	24.7738	36.3101	OK	29.9537	24.2421	35.6652	OK	39.9131	32.557
917	chr5	9046461	9047460	+	0	NA	intron (NM_003966, intron 21 of 22)	intron (NM_003966, intron 21 of 22)	7047	NR_039779	100616326		NR_039779	ENSG00000266415	MIR4636	mir-4636	microRNA 4636	ncRNA	MIR4636	-	-	MIR4636	MIR4636	TSS13348	chr5:9035137-9546233	-	-	0	0	0	OK	0	0	0	OK	0	0	0	OK	0	0	0	OK	0	0	0	OK	0	0
3431	chr8	23711212	23712211	+	0	NA	intron (NM_003155, intron 1 of 3)	intron (NM_003155, intron 1 of 3)	609	NM_003155	6781	Hs.25590	NM_003155	ENSG00000159167	STC1	STC	stanniocalcin 1	protein-coding	STC1	-	-	STC1	STC1	TSS3535	chr8:23699433-23712320	-	-	5.21917	4.0698	6.36854	OK	6.67087	5.26124	8.0805	OK	20.1497	16.5173	23.7822	OK	14.0402	11.4117	16.6687	OK	2.04386	1.47727	2.61046	OK	11.0935	8.94706
6003	chr5	137686872	137687871	+	0	NA	promoter-TSS (NM_016604)	promoter-TSS (NM_016604)	-914	NM_016604	51780	Hs.483486	NM_016604	ENSG00000120733	KDM3B	5qNCA|C5orf7|JMJD1B|NET22	lysine demethylase 3B	protein-coding	KDM3B	-	-	KDM3B	KDM3B	TSS2776	chr5:137688284-137772716	-	-	3.15951	2.46624	3.85278	OK	4.53879	3.61021	5.46737	OK	2.84432	2.21127	3.47738	OK	3.36617	2.64194	4.09039	OK	3.74217	2.94956	4.53478	OK	5.00938	4.00507
4977	chr12	6450957	6451956	+	0	NA	promoter-TSS (NM_001065)	promoter-TSS (NM_001065)	-173	NM_001065	7132	Hs.279594	NM_001065	ENSG00000067182	TNFRSF1A	CD120a|FPF|TBP1|TNF-R|TNF-R-I|TNF-R55|TNFAR|TNFR1|TNFR55|TNFR60|p55|p55-R|p60	TNF receptor superfamily member 1A	protein-coding	TNFRSF1A	-	-	TNFRSF1A	TNFRSF1A	TSS29860	chr12:6437922-6451283	-	-	58.8501	48.5395	69.1607	OK	94.2093	78.3681	110.05	OK	73.8626	61.3085	86.4168	OK	93.972	78.1936	109.75	OK	64.492	53.3549	75.6292	OK	101.189	84.261
495	chr12	4385795	4386794	+	0	NA	promoter-TSS (NR_125790)	promoter-TSS (NR_125790)	-944	NR_125790	103752584	Hs.577711	NR_125790	ENSG00000256164	CCND2-AS1	-	CCND2 antisense RNA 1	ncRNA	CCND2-AS1	-	-	CCND2-AS1	CCND2-AS1	TSS33678	chr12:4357932-4414522	-	-	0.07152	0	0.415916	OK	0.23775	0	0.801429	OK	0.124488	0	0.639596	OK	0	0	0	OK	4.8e-06	0	0.269088	OK	0.148251	0
4501	chr20	30457888	30458887	+	0	NA	promoter-TSS (NM_001320479)	promoter-TSS (NM_001320479)	80	NM_001320478	128853	Hs.434108	NM_080611	ENSG00000149599	DUSP15	C20orf57|VHY	dual specificity phosphatase 15	protein-coding
3889	chr11	129938330	129939329	+	0	NA	promoter-TSS (NM_001328682)	promoter-TSS (NM_001328682)	-887	NM_001642	334	Hs.370247	NM_001642	ENSG00000084234	APLP2	APLP-2|APPH|APPL2|CDEBP	amyloid beta precursor like protein 2	protein-coding	APLP2	-	-	APLP2	APLP2	TSS23879,TSS26951	chr11:129939715-130014706	-	-	241.156	202.726	279.585	OK	234.743	197.486	272	OK	350.516	294.438	406.594	OK	289.591	243.719	335.463	OK	323.446	271.945	374.948	OK	379.163	318.508
3302	chr1	28907804	28908803	+	0	NA	promoter-TSS (NR_024127)	promoter-TSS (NR_024127)	63	NR_024127	85028	Hs.632377	NM_053040	ENSG00000197989	SNHG12	ASLNC04080|C1orf79|LINC00100|NCRNA00100	small nucleolar RNA host gene 12	ncRNA
2086	chr5	38420488	38421487	+	0	NA	intron (NM_152403, intron 12 of 21)	intron (NM_152403, intron 12 of 21)	17353	NM_182798	133584	Hs.20103	NM_152403	ENSG00000164318	EGFLAM	AGRINL|AGRNL|PIKA	EGF like, fibronectin type III and laminin G domains	protein-coding
1322	chr16	70096899	70097898	+	0	NA	intron (NR_003610, intron 1 of 25)	AluSg|SINE|Alu	2453	NR_003610	283970	Hs.513695	NM_199134	ENSG00000196696	PDXDC2P	NPIP|PDXDC2	pyridoxal dependent decarboxylase domain containing 2, pseudogene	pseudo
1816	chr22	35652970	35653969	+	0	NA	promoter-TSS (NR_027780)	promoter-TSS (NR_027780)	24	NM_001003681	10042	Hs.588815	NM_005487	ENSG00000100281	HMGXB4	HMG2L1|HMGBCG|THC211630	HMG-box containing 4	protein-coding
5804	chr10	124192611	124193610	+	0	NA	Intergenic	Intergenic	16629	NR_037506	100500866		NR_037506	ENSG00000265442	MIR3941	-	microRNA 3941	ncRNA	MIR3941	-	-	MIR3941	MIR3941	TSS13030	chr10:124134093-124191871	-	-	0	0	0	OK	0	0	0	OK	0	0	0	OK	0	0	0	OK	0	0	0	OK	0	0
5174	chr1	144533788	144534787	+	0	NA	intron (NM_001278267, intron 52 of 130)	intron (NM_001278267, intron 52 of 130)	78432	NR_003242	767846	Hs.657186	NR_003242	ENSG00000270392	PFN1P2	C1orf152|COAS3	profilin 1 pseudogene 2	pseudo	PFN1P2	-	-	PFN1P2	PFN1P2	TSS16444	chr1:144146810-146467744	-	-	0.0552516	0	0.753338	OK	0.138571	0	1.41092	OK	0.0374877	0	0.710041	OK	0.120954	0	1.29312	OK	0.100281	0	1.02525	OK	0.108034	0
2460	chr5	8008292	8009291	+	0	NA	Intergenic	L1M3e|LINE|L1	139574	NR_134481	4552	Hs.481551	NM_002454	ENSG00000124275	MTRR	MSR|cblE	5-methyltetrahydrofolate-homocysteine methyltransferase reductase	protein-coding
4293	chr19	44763694	44764693	+	0	NA	intron (NM_181756, intron 1 of 4)	CpG	126	NM_181756	353355	Hs.466891	NM_181756	ENSG00000159915	ZNF233	-	zinc finger protein 233	protein-coding	ZNF233	-	-	ZNF233	ZNF233	TSS16359,TSS6568	chr19:44764032-44779470	-	-	0.11495	0.00373828	0.226161	OK	0.648805	0.367405	0.930205	OK	0.251288	0.0877594	0.414817	OK	0.635537	0.34133	0.929744	OK	0.206568	0.0602993	0.352837	OK	0.338925	0.128214
2699	chr10	15124237	15125236	+	0	NA	intron (NR_144471, intron 1 of 7)	Charlie4z|DNA|hAT-Charlie	6039	NM_001039844	414149	Hs.644598	NM_001039844	ENSG00000176244	ACBD7	bA455B2.2	acyl-CoA binding domain containing 7	protein-coding	ACBD7	-	-	ACBD7	ACBD7	TSS16331	chr10:15117473-15130775	-	-	0.0580166	0	0.135961	OK	0.330558	0.151768	0.509348	OK	0.0275419	0	0.0917827	OK	0.383163	0.185862	0.580464	OK	0.213069	0.0731168	0.35302	OK	0.240238	0.0923135
5067	chr11	6759353	6760352	+	0	NA	Intergenic	Intergenic	-16742	NR_003945	387751	Hs.494757	NR_003945	ENSG00000254838	GVINP1	GVIN1|GVIN1P|VLIG-1|VLIG1	GTPase, very large interferon inducible pseudogene 1	pseudo	GVINP1	-	-	GVINP1	GVINP1	TSS24090	chr11:6734380-6743110	-	-	0.0217107	0	0.0466905	OK	0.0085272	0	0.0299949	OK	0.00938088	0	0.0327927	OK	0.00823573	0	0.0291348	OK	0.0330635	0.00130137	0.0648256	OK	0	0
1259	chr10	72311500	72312499	+	0	NA	intron (NM_014431, intron 18 of 19)	intron (NM_014431, intron 18 of 19)	50532	NM_001083116	5551	Hs.2200	NM_005041	ENSG00000180644	PRF1	FLH2|HPLH2|P1|PFN1|PFP	perforin 1	protein-coding
5464	chr16	75251486	75252485	+	0	NA	promoter-TSS (NM_001329190)	promoter-TSS (NM_001329190)	-899	NM_001906	1504	Hs.610926	NM_001906	ENSG00000168925	CTRB1	CTRB	chymotrypsinogen B1	protein-coding	CTRB1	-	-	CTRB1	CTRB1	TSS28160	chr16:75252883-75258822	-	-	0	0	0	OK	0	0	0	OK	0	0	0	OK	0	0	0	OK	0	0	0	OK	0	0
3824	chr3	15677211	15678210	+	0	NA	intron (NM_000060, intron 2 of 3)	intron (NM_000060, intron 2 of 3)	34234	NM_001281725	686	Hs.444197	NM_000060	ENSG00000169814	BTD	-	biotinidase	protein-coding
3574	chr1	115721850	115722849	+	0	NA	Intergenic	Intergenic	-90228	NM_001308315	10100	Hs.310458	NM_005725	ENSG00000134198	TSPAN2	NET3|TSN2|TSPAN-2	tetraspanin 2	protein-coding
2976	chr2	96853369	96854368	+	0	NA	intron (NM_020151, intron 6 of 7)	AluSz|SINE|Alu	-20286	NR_046322	285033	Hs.58648	NM_001037228		STARD7-AS1	-	STARD7 antisense RNA 1	ncRNA
5401	chr6	31795069	31796068	+	0	NA	promoter-TSS (NM_005346)	promoter-TSS (NM_005346)	56	NM_005346	3304	Hs.274402	NM_005346	ENSG00000204388	HSPA1B	HSP70-1B|HSP70-2|HSP70.2	heat shock protein family A (Hsp70) member 1B	protein-coding	HSPA1B	-	-	HSPA1B	HSPA1B	TSS16537,TSS19818,TSS21834,TSS33155,TSS5352	chr6:31795511-31798031	-	-	7.69018	5.84154	9.53881	OK	7.21589	5.48799	8.94378	OK	10.9631	8.59946	13.3268	OK	9.85543	7.65303	12.0578	OK	6.31806	4.74606	7.89006	OK	8.93156	6.88332
3475	chr6	141217922	141218921	+	0	NA	Intergenic	MER61-int|LTR|ERV1	213470	NR_039675	100616180		NR_039675	ENSG00000264390	MIR4465	-	microRNA 4465	ncRNA	MIR4465	-	-	MIR4465	MIR4465	TSS2432	chr6:141004950-141005020	-	-	0	0	0	OK	0	0	0	OK	0	0	0	OK	0	0	0	OK	0	0	0	OK	0	0
4319	chr16	50550979	50551978	+	0	NA	Intergenic	L1MA9|LINE|L1	-30763	NM_033119	85407	Hs.187578	NM_033119	ENSG00000140807	NKD1	Naked1	naked cuticle homolog 1	protein-coding	NKD1	-	-	NKD1	NKD1	TSS1286	chr16:50582240-50674771	-	-	0.00235235	0	0.0171449	OK	0.00711004	0	0.0279924	OK	0	0	0	OK	0	0	0	OK	0.0211001	0	0.0473164	OK	0.00266961	0
6327	chr16	89794834	89795833	+	0	NA	intron (NM_001113525, intron 5 of 10)	intron (NM_001113525, intron 5 of 10)	7381	NM_001113525	92822	Hs.290154	NM_152287	ENSG00000158805	ZNF276	CENP-Z|CENPZ|ZADT|ZFP276|ZNF477	zinc finger protein 276	protein-coding
5531	chr11	44942675	44943674	+	0	NA	intron (NM_130783, intron 7 of 8)	MLT1J|LTR|ERVL-MaLR	28585	NM_001318384	9537	Hs.554791	NM_006034	ENSG00000175274	TP53I11	PIG11	tumor protein p53 inducible protein 11	protein-coding
3421	chr4	966376	967375	+	0	NA	intron (NM_001347, intron 1 of 22)	CpG	473	NM_001347	1609	Hs.584858	NM_001347	ENSG00000145214	DGKQ	DAGK|DAGK4|DAGK7	diacylglycerol kinase theta	protein-coding	DGKQ	-	-	DGKQ	DGKQ	TSS6802	chr4:952671-967348	-	-	2.15297	1.53957	2.76637	OK	1.33109	0.911612	1.75057	OK	0.951821	0.623522	1.28012	OK	0.977982	0.643292	1.31267	OK	1.29561	0.875286	1.71593	OK	1.96564	1.40811
3238	chr7	77165587	77166586	+	0	NA	promoter-TSS (NM_002835)	promoter-TSS (NM_002835)	-687	NM_002835	5782	Hs.61812	NM_002835	ENSG00000127947	PTPN12	PTP-PEST|PTPG1	protein tyrosine phosphatase, non-receptor type 12	protein-coding	PTPN12	-	-	PTPN12	PTPN12	TSS21722,TSS33994	chr7:77166772-77269388	-	-	8.21469	6.54326	9.88612	OK	8.56975	6.76783	10.3717	OK	9.79862	7.77729	11.8199	OK	11.5993	9.27545	13.9232	OK	7.85258	6.20562	9.49953	OK	11.7667	9.44083
2274	chr10	17658395	17659394	+	0	NA	intron (NM_014241, intron 1 of 6)	CpG	479	NM_014241	9200	Hs.114062	NM_014241	ENSG00000165996	HACD1	CAP|PTPLA	3-hydroxyacyl-CoA dehydratase 1	protein-coding	HACD1	-	-	HACD1	HACD1	TSS11273	chr10:17631957-17659373	-	-	33.1699	26.557	39.7828	OK	40.7613	32.8403	48.6824	OK	12.8659	9.71249	16.0193	OK	19.0994	14.8805	23.3183	OK	99.503	82.203	116.803	OK	50.2907	40.8401
5938	chr11	129242719	129243718	+	0	NA	Intergenic	CpG	-2663	NM_003658	8538	Hs.591944	NM_003658	ENSG00000043039	BARX2	-	BARX homeobox 2	protein-coding	BARX2	-	-	BARX2	BARX2	TSS28941	chr11:129245880-129322174	-	-	0	0	0	OK	0	0	0	OK	0	0	0	OK	0	0	0	OK	0	0	0	OK	0	0
2002	chr6	158402183	158403182	+	0	NA	promoter-TSS (NM_003898)	promoter-TSS (NM_003898)	-206	NM_003898	8871	Hs.434494	NM_003898	ENSG00000078269	SYNJ2	INPP5H	synaptojanin 2	protein-coding	SYNJ2	-	-	SYNJ2	SYNJ2	TSS25528,TSS27583	chr6:158402887-158520207	-	-	16.3952	13.5624	19.228	OK	14.3139	11.8132	16.8146	OK	21.9707	18.2569	25.6844	OK	14.691	12.1306	17.2514	OK	11.1205	9.13486	13.1061	OK	23.4268	19.4827
4902	chr8	123669576	123670575	+	0	NA	Intergenic	LTR16C|LTR|ERVL	36270	NR_126348	104266958	Hs.575540	NR_126348	ENSG00000253819	LINC01151	-	long intergenic non-protein coding RNA 1151	ncRNA	LINC01151	-	-	LINC01151	LINC01151	TSS31208	chr8:123682623-123706345	-	-	0.516693	0	1.34244	OK	0.496817	0	1.13243	OK	0.1996	0	0.650346	OK	0.487322	0	1.2646	OK	0.256743	0	0.746214	OK	0.219078	0
4591	chr10	135144718	135145717	+	0	NA	intron (NM_015722, intron 1 of 5)	L1MEe|LINE|L1	5258	NM_015722	50632	Hs.148680	NM_015722	ENSG00000130643	CALY	DRD1IP|NSG3	calcyon neuron specific vesicular protein	protein-coding	CALY	-	-	CALY	CALY	TSS21245	chr10:135138927-135150475	-	-	0	0	0	OK	0.0310096	0	0.178071	OK	0	0	0	OK	0	0	0	OK	0.031882	0	0.178426	OK	0	0
1203	chr3	9851355	9852354	+	0	NA	non-coding (NR_037162, exon 1 of 11)	non-coding (NR_037162, exon 1 of 11)	210	NR_037162	26140	Hs.726435	NM_015644	ENSG00000214021	TTLL3	HOTTL	tubulin tyrosine ligase like 3	protein-coding
5508	chr9	33836813	33837812	+	0	NA	intron (NM_017811, intron 1 of 4)	AluJb|SINE|Alu	20130	NM_017811	54926	Hs.643648	NM_017811	ENSG00000107341	UBE2R2	CDC34B|E2-CDC34B|UBC3B	ubiquitin conjugating enzyme E2 R2	protein-coding	UBE2R2	-	-	UBE2R2	UBE2R2	TSS11765	chr9:33817181-33920401	-	-	12.596	10.2217	14.9703	OK	13.8387	11.252	16.4254	OK	12.1942	9.87162	14.5167	OK	10.1381	8.15966	12.1164	OK	11.7982	9.55197	14.0444	OK	12.8562	10.4392
5873	chr8	2262729	2263728	+	0	NA	Intergenic	Intergenic	217225	NR_125423	101927815	Hs.571467	NR_125423	ENSG00000254319	LOC101927815	-	uncharacterized LOC101927815	ncRNA	LOC101927815	-	-	LOC101927815	LOC101927815	TSS19635,TSS23837	chr8:2387218-2585991	-	-	0.286912	0	0.775611	OK	0.690686	0	1.43771	OK	0.224305	0	0.687123	OK	0.646513	0	1.38609	OK	0.379869	0	0.988249	OK	0.241609	0
4261	chr3	105986481	105987480	+	0	NA	Intergenic	MLT2B1|LTR|ERVL	-398714	NM_001321790	868	Hs.430589	NM_170662	ENSG00000114423	CBLB	Cbl-b|Nbla00127|RNF56	Cbl proto-oncogene B	protein-coding
2088	chr17	74732359	74733358	+	0	NA	promoter-TSS (NM_001242533)	promoter-TSS (NM_001242533)	211	NM_001242534	79157	Hs.73965	NM_024311	ENSG00000092931	MFSD11	ET	major facilitator superfamily domain containing 11	protein-coding
1068	chr12	125365153	125366152	+	0	NA	Intergenic	AluJo|SINE|Alu	-17133	NM_001082959	949	Hs.731377	NM_005505	ENSG00000073060	SCARB1	CD36L1|CLA-1|CLA1|HDLQTL6|SR-BI|SRB1	scavenger receptor class B member 1	protein-coding
4429	chr14	73392872	73393871	+	0	NA	intron (NM_181340, intron 1 of 12)	CpG	331	NM_015604	26094	Hs.331491	NM_015604	ENSG00000119599	DCAF4	WDR21|WDR21A	DDB1 and CUL4 associated factor 4	protein-coding	DCAF4	-	-	DCAF4	DCAF4	TSS2367	chr14:73393039-73426357	-	-	8.45093	6.54391	10.3579	OK	9.3848	7.29653	11.4731	OK	6.71073	5.13092	8.29053	OK	8.36454	6.46428	10.2648	OK	9.36871	7.31053	11.4269	OK	9.47864	7.40758
486	chr8	146016930	146017929	+	0	NA	promoter-TSS (NR_106909)	promoter-TSS (NR_106909)	-53	NR_106909	102465978		NR_106909	ENSG00000161016	MIR6850	hsa-mir-6850	microRNA 6850	ncRNA	MIR6850	-	-	MIR6850	MIR6850	TSS11972	chr8:146015153-146017805	-	-	0	0	0	OK	0	0	0	OK	0	0	0	OK	0	0	0	OK	0	0	0	OK	0	0
2134	chr5	133475838	133476837	+	0	NA	intron (NM_213648, intron 3 of 7)	intron (NM_213648, intron 3 of 7)	25083	NM_001134851	6932	Hs.573153	NM_003202	ENSG00000081059	TCF7	TCF-1	transcription factor 7 (T-cell specific, HMG-box)	protein-coding
1354	chr19	7993432	7994431	+	0	NA	intron (NM_006351, intron 10 of 12)	intron (NM_006351, intron 10 of 12)	-2880	NM_206833	404217	Hs.657978	NM_206833	ENSG00000178531	CTXN1	CTXN	cortexin 1	protein-coding	CTXN1	-	-	CTXN1	CTXN1	TSS5797	chr19:7989380-7991051	-	-	1.8984	0.835737	2.96107	OK	3.82827	2.29098	5.36557	OK	4.45001	2.78883	6.1112	OK	3.89888	2.34917	5.44858	OK	3.02994	1.69442	4.36545	OK	3.97325	2.3408
4066	chr1	220701244	220702243	+	0	NA	5' UTR (NM_001286129, exon 1 of 3)	5' UTR (NM_001286129, exon 1 of 3)	218	NM_001286128	4139	Hs.497806	NM_018650	ENSG00000116141	MARK1	MARK|Par-1c|Par1c	microtubule affinity regulating kinase 1	protein-coding
4213	chr11	75236368	75237367	+	0	NA	promoter-TSS (NM_030792)	promoter-TSS (NM_030792)	-268	NM_030792	81544	Hs.503297	NM_030792	ENSG00000158555	GDPD5	GDE2|PP1665	glycerophosphodiester phosphodiesterase domain containing 5	protein-coding	GDPD5	-	-	GDPD5	GDPD5	TSS10081	chr11:75145684-75236599	-	-	1.07125	0.674244	1.46825	OK	1.17137	0.760951	1.58178	OK	0.523121	0.281849	0.764394	OK	0.687752	0.396467	0.979036	OK	2.66514	1.9206	3.40968	OK	2.47458	1.77294
8	chr22	38220858	38221857	+	0	NA	exon (NM_003614, exon 2 of 2)	exon (NM_003614, exon 2 of 2)	1968	NM_003614	8484	Hs.158353	NM_003614	ENSG00000128310	GALR3	-	galanin receptor 3	protein-coding	GALR3	-	-	GALR3	GALR3	TSS13503	chr22:38219388-38221502	-	-	0	0	0	OK	0.0324473	0	0.163791	OK	0	0	0	OK	0	0	0	OK	0	0	0	OK	0	0
3239	chr5	97645268	97646267	+	0	NA	Intergenic	Intergenic	-459232	NM_001012761	285704	Hs.526902	NM_173670	ENSG00000174136	RGMB	DRAGON	repulsive guidance molecule family member b	protein-coding
2359	chr6	31939436	31940435	+	0	NA	promoter-TSS (NM_005510)	promoter-TSS (NM_005510)	97	NM_005510	1797	Hs.153299	NM_005510	ENSG00000204348	DXO	DOM3L|DOM3Z|NG6|RAI1	decapping exoribonuclease	protein-coding	DXO	-	-	DXO	DXO	TSS11321,TSS23722,TSS24244,TSS26197,TSS3797,TSS9398	chr6:31937587-31949223	-	-	8.34922	5.88216	10.8163	OK	15.3984	11.7267	19.07	OK	13.7203	10.3057	17.135	OK	18.7493	14.3461	23.1525	OK	15.5239	11.6198	19.428	OK	20.9926	15.9348
5309	chr21	39806384	39807383	+	0	NA	intron (NM_001243429, intron 2 of 8)	intron (NM_001243429, intron 2 of 8)	63545	NM_001136155	2078	Hs.473819	NM_004449	ENSG00000157554	ERG	erg-3|p55	ERG, ETS transcription factor	protein-coding
2045	chr11	58524234	58525233	+	0	NA	Intergenic	L2a|LINE|L2	-25286	NM_201648	10249	Hs.145384	NM_005838	ENSG00000149124	GLYAT	ACGNAT|CAT|GAT	glycine-N-acyltransferase	protein-coding
686	chr2	39664139	39665138	+	0	NA	promoter-TSS (NM_001270425)	promoter-TSS (NM_001270425)	81	NR_037875	728730	Hs.655344	NR_037875	ENSG00000231312	LOC728730	-	uncharacterized LOC728730	ncRNA	LOC728730	-	-	LOC728730	LOC728730	TSS31829	chr2:39664556-39828484	-	-	0.608205	0.318257	0.898153	OK	0.78287	0.432425	1.13332	OK	1.23773	0.758359	1.7171	OK	1.02572	0.616643	1.43481	OK	0.714538	0.385899	1.04318	OK	0.949722	0.562598
5310	chr5	95553849	95554848	+	0	NA	intron (NR_130776, intron 1 of 4)	L2c|LINE|L2	139506	NR_030309	693168		NR_030309	ENSG00000207578	MIR583	MIRN583|hsa-mir-583	microRNA 583	ncRNA	MIR583	-	-	MIR583	MIR583	TSS505	chr5:95220801-95966789	-	-	0	0	0	OK	0	0	0	OK	0	0	0	OK	0	0	0	OK	0	0	0	OK	0	0
3149	chrX	131845061	131846060	+	0	NA	intron (NM_001077188, intron 3 of 5)	MIR3|SINE|MIR	43890	NR_046691	100874102	Hs.619341	NR_046691	ENSG00000235849	HS6ST2-AS1	-	HS6ST2 antisense RNA 1	ncRNA	HS6ST2-AS1	-	-	HS6ST2-AS1	HS6ST2-AS1	TSS18584	chrX:131760037-132095423	-	-	0	0	0	OK	0	0	0	OK	0	0	0	OK	0	0	0	OK	0	0	0	OK	0	0
6375	chr1	20692825	20693824	+	0	NA	intron (NR_033887, intron 10 of 11)	CpG	61963	NR_033887	339505	Hs.633269	NR_033887		LINC01141	-	long intergenic non-protein coding RNA 1141	ncRNA	LINC01141	-	-	LINC01141	LINC01141	TSS23539	chr1:20686293-20755287	-	-	0	0	0	OK	0.0158369	0	0.0489295	OK	0.00523877	0	0.038678	OK	0.00523534	0	0.0389649	OK	0	0	0	OK	0.0114034	0
943	chr16	30102838	30103837	+	0	NA	promoter-TSS (NM_004608)	promoter-TSS (NM_004608)	-132	NM_004608	6911	Hs.198301	NM_004608	ENSG00000149922	TBX6	SCDO5	T-box 6	protein-coding	TBX6	-	-	TBX6	TBX6	TSS20090	chr16:30097114-30103205	-	-	0.0327065	0	0.123535	OK	0.0586075	0	0.187858	OK	0.0137824	0	0.0891852	OK	0.0814411	0	0.203837	OK	0	0	0	OK	0.0998458	0
1887	chr13	114461797	114462796	+	0	NA	promoter-TSS (NM_182614)	promoter-TSS (NM_182614)	80	NM_182614	348013	Hs.280805	NM_182614	ENSG00000184497	TMEM255B	FAM70B	transmembrane protein 255B	protein-coding	TMEM255B	-	-	TMEM255B	TMEM255B	TSS17734	chr13:114462215-114514899	-	-	2.71276	1.50357	3.92195	OK	5.80359	3.90402	7.70317	OK	4.49295	2.94352	6.04239	OK	3.93718	2.4896	5.38476	OK	1.28035	0.556209	2.0045	OK	1.67699	0.819386
4258	chr12	31818416	31819415	+	0	NA	intron (NM_001135863, intron 2 of 3)	MER9a2|LTR|ERVK	6306	NM_001135863	254013	Hs.740628	NM_173802	ENSG00000139160	ETFBKMT	C12orf72|ETFB-KMT|METTL20	electron transfer flavoprotein beta subunit lysine methyltransferase	protein-coding
1585	chr10	124767727	124768726	+	0	NA	promoter-TSS (NM_001609)	promoter-TSS (NM_001609)	-23	NM_001271840	64376	Hs.501289	NM_001271840	ENSG00000095574	IKZF5	PEGASUS|ZNFN1A5	IKAROS family zinc finger 5	protein-coding	IKZF5	-	-	IKZF5	IKZF5	TSS21045,TSS5777	chr10:124750321-124768366	-	-	7.24223	5.78831	8.69616	OK	7.21406	5.72155	8.70657	OK	10.3254	8.30034	12.3504	OK	6.89091	5.47338	8.30845	OK	6.36796	5.04458	7.69134	OK	4.76272	3.72227
4709	chr11	77056460	77057459	+	0	NA	intron (NM_001128620, intron 9 of 15)	intron (NM_001128620, intron 9 of 15)	-58496	NM_182833	220032	Hs.249795	NM_182833	ENSG00000178795	GDPD4	GDE6	glycerophosphodiester phosphodiesterase domain containing 4	protein-coding	GDPD4	-	-	GDPD4	GDPD4	TSS22986	chr11:76927602-76998463	-	-	0	0	0	OK	0	0	0	OK	0	0	0	OK	0	0	0	OK	0	0	0	OK	0	0
4993	chr10	24548179	24549178	+	0	NA	intron (NM_001098500, intron 3 of 18)	intron (NM_001098500, intron 3 of 18)	-15936	NR_030334	693188		NR_030334	ENSG00000207930	MIR603	MIRN603|hsa-mir-603	microRNA 603	ncRNA	MIR603	-	-	MIR603	MIR603	TSS33797	chr10:23983674-24836777	-	-	0	0	0	OK	0	0	0	OK	0	0	0	OK	0	0	0	OK	0	0	0	OK	0	0
6631	chr20	55401617	55402616	+	0	NA	Intergenic	Intergenic	197758	NM_003222	7022	Hs.473152	NM_003222	ENSG00000087510	TFAP2C	AP2-GAMMA|ERF1|TFAP2G|hAP-2g	transcription factor AP-2 gamma	protein-coding	TFAP2C	-	-	TFAP2C	TFAP2C	TSS27207	chr20:55204357-55214338	-	-	0	0	0	OK	0	0	0	OK	0	0	0	OK	0	0	0	OK	0	0	0	OK	0	0
4474	chr19	12904147	12905146	+	0	NA	TTS (NM_002229)	TTS (NM_002229)	2336	NM_002229	3726	Hs.25292	NM_002229	ENSG00000171223	JUNB	AP-1	JunB proto-oncogene, AP-1 transcription factor subunit	protein-coding	JUNB	-	-	JUNB	JUNB	TSS4556	chr19:12902309-12904125	-	-	64.3496	52.2748	76.4245	OK	93.9641	77.5141	110.414	OK	94.6217	78.1688	111.075	OK	159.766	132.954	186.577	OK	45.7387	36.9822	54.4953	OK	241.377	201.722
2705	chr11	67243293	67244292	+	0	NA	Intergenic	LTR12C|LTR|ERV1	-6708	NM_003977	9049	Hs.412433	NM_003977	ENSG00000110711	AIP	ARA9|FKBP16|FKBP37|SMTPHN|XAP-2|XAP2	aryl hydrocarbon receptor interacting protein	protein-coding	AIP	-	-	AIP	AIP	TSS10768,TSS11102	chr11:67250499-67258579	-	-	40.0594	32.1616	47.9573	OK	53.9558	43.8782	64.0335	OK	60.4555	49.5141	71.3968	OK	84.7958	69.7725	99.8191	OK	52.6817	42.8329	62.5305	OK	85.3314	70.0531
690	chr12	53339363	53340362	+	0	NA	intron (NM_001256293, intron 1 of 8)	intron (NM_001256293, intron 1 of 8)	-2793	NM_199187	3875	Hs.406013	NM_000224	ENSG00000111057	KRT18	CK-18|CYK18|K18	keratin 18	protein-coding
5825	chr16	66878340	66879339	+	0	NA	promoter-TSS (NM_001014435)	promoter-TSS (NM_001014435)	-2	NM_001014435	766	Hs.37014	NM_005182	ENSG00000168748	CA7	CAVII	carbonic anhydrase 7	protein-coding
61	chr16	80298295	80299294	+	0	NA	intron (NR_120307, intron 2 of 5)	MIRb|SINE|MIR	-275837	NM_001305017	83657	Hs.98849	NM_130897	ENSG00000168589	DYNLRB2	DNCL2B|DNLC2B|ROBLD2	dynein light chain roadblock-type 2	protein-coding
4475	chr2	65663218	65664217	+	0	NA	Intergenic	CpG	-4061	NM_181784	200734	Hs.59332	NM_181784	ENSG00000198369	SPRED2	Spred-2	sprouty related EVH1 domain containing 2	protein-coding	SPRED2	-	-	SPRED2	SPRED2	TSS28004,TSS31614	chr2:65537984-65659656	-	-	8.71072	6.93553	10.4859	OK	6.20256	4.8706	7.53451	OK	13.1163	10.5954	15.6371	OK	8.6412	6.89284	10.3896	OK	4.6953	3.62523	5.76537	OK	5.43203	4.23419
5215	chr9	135821684	135822683	+	0	NA	intron (NM_004188, intron 1 of 10)	intron (NM_004188, intron 1 of 10)	1089	NR_049862	100846992		NR_049862	ENSG00000263816	MIR548AW	-	microRNA 548aw	ncRNA	MIR548AW	-	-	MIR548AW	MIR548AW	TSS29652	chr9:135820931-135867084	-	-	0	0	0	OK	0	0	0	OK	0	0	0	OK	0	0	0	OK	0	0	0	OK	0	0
5970	chr7	111363263	111364262	+	0	NA	Intergenic	Intergenic	-84799	NR_103806	100506413	Hs.677513	NR_103806	ENSG00000225572	DOCK4-AS1	-	DOCK4 antisense RNA 1	ncRNA	DOCK4-AS1	-	-	DOCK4-AS1	DOCK4-AS1	TSS3064	chr7:111366163-111846462	-	-	0	0	0	OK	0	0	0	OK	0	0	0	OK	0.00803966	0	0.0803784	OK	0	0	0	OK	0.0165212	0
4094	chr10	11864782	11865781	+	0	NA	promoter-TSS (NM_153256)	promoter-TSS (NM_153256)	-116	NM_153256	254427	Hs.435775	NM_153256	ENSG00000148426	PROSER2	C10orf47	proline and serine rich 2	protein-coding	PROSER2	-	-	PROSER2	PROSER2	TSS25329	chr10:11865396-11936709	-	-	0	0	0	OK	0.0163041	0	0.058349	OK	0.0083037	0	0.0503816	OK	0.00760878	0	0.0493807	OK	0.14155	0.0116202	0.271479	OK	0.0452361	0
3540	chr19	19496343	19497342	+	0	NA	5' UTR (NM_017660, exon 1 of 12)	5' UTR (NM_017660, exon 1 of 12)	200	NM_017660	54815	Hs.118964	NM_017660	ENSG00000167491	GATAD2A	p66alpha	GATA zinc finger domain containing 2A	protein-coding	GATAD2A	-	-	GATAD2A	GATAD2A	TSS13169,TSS23819	chr19:19496641-19619741	-	-	7.97831	6.39174	9.56487	OK	5.45961	4.30408	6.61514	OK	5.28354	4.16332	6.40377	OK	4.44059	3.46357	5.41762	OK	7.08218	5.63746	8.52691	OK	5.91896	4.68257
6421	chr10	104168506	104169505	+	0	NA	promoter-TSS (NR_073110)	promoter-TSS (NR_073110)	36	NR_073110	5662	Hs.154658	NM_002779	ENSG00000059915	PSD	EFA6|EFA6A|PSD1|TYL	pleckstrin and Sec7 domain containing	protein-coding
4704	chr7	131197962	131198961	+	0	NA	intron (NM_001018111, intron 1 of 8)	intron (NM_001018111, intron 1 of 8)	42915	NM_005397	5420	Hs.744213	NM_005397	ENSG00000128567	PODXL	Gp200|PC|PCLP|PCLP-1	podocalyxin like	protein-coding	PODXL	-	-	PODXL	PODXL	TSS588	chr7:131185020-131241376	-	-	0.22238	0.0921849	0.352576	OK	0.300841	0.159063	0.442619	OK	0.0204866	0	0.0607515	OK	0.0675628	0	0.154073	OK	1.08366	0.765065	1.40225	OK	0.494196	0.30785
2394	chr17	30022978	30023977	+	0	NA	Intergenic	Intergenic	121047	NR_029856	100126356		NR_029856	ENSG00000228768	MIR365B	MIR365-2|MIRN365-2|hsa-mir-365b|mir-365b	microRNA 365b	ncRNA	MIR365B	-	-	MIR365B	MIR365B	TSS32561	chr17:29902429-29902540	-	-	0	0	0	OK	0	0	0	OK	0	0	0	OK	0	0	0	OK	0	0	0	OK	0	0
1266	chr10	62291811	62292810	+	0	NA	intron (NM_001204403, intron 2 of 43)	intron (NM_001204403, intron 2 of 43)	40404	NM_001204404	288	Hs.499725	NM_001149	ENSG00000151150	ANK3	ANKYRIN-G|MRT37	ankyrin 3	protein-coding
6578	chr17	79980980	79981979	+	0	NA	promoter-TSS (NM_144998)	promoter-TSS (NM_144998)	301	NM_144999	201255	Hs.143774	NM_144999	ENSG00000169683	LRRC45	-	leucine rich repeat containing 45	protein-coding	LRRC45	-	-	LRRC45	LRRC45	TSS15593	chr17:79981177-79989027	-	-	11.1686	8.6594	13.6779	OK	9.6651	7.49712	11.8331	OK	9.18682	7.14067	11.233	OK	14.2343	11.2795	17.1892	OK	9.8197	7.61812	12.0213	OK	7.87676	6.02171
6076	chr17	15461480	15462479	+	0	NA	intron (NM_001135036, intron 1 of 5)	MLT1D|LTR|ERVL-MaLR	4966	NR_037924	100533496	Hs.164595	NM_001204478	ENSG00000259024	TVP23C-CDRT4	FAM18B2-CDRT4	TVP23C-CDRT4 readthrough	protein-coding
5780	chr5	153008216	153009215	+	0	NA	intron (NM_001258020, intron 3 of 16)	intron (NM_001258020, intron 3 of 16)	136983	NM_001258022	2890	Hs.519693	NM_000827	ENSG00000155511	GRIA1	GLUH1|GLUR1|GLURA|GluA1|HBGR1	glutamate ionotropic receptor AMPA type subunit 1	protein-coding
3419	chr7	43622187	43623186	+	0	NA	promoter-TSS (NM_004760)	promoter-TSS (NM_004760)	-6	NM_004760	9263	Hs.709489	NM_004760	ENSG00000164543	STK17A	DRAK1	serine/threonine kinase 17a	protein-coding	STK17A	-	-	STK17A	STK17A	TSS9820	chr7:43622691-43666978	-	-	37.3935	31.1001	43.687	OK	23.9298	19.7249	28.1348	OK	43.0424	35.7804	50.3044	OK	26.3336	21.748	30.9191	OK	42.3563	35.2394	49.4732	OK	33.8855	28.1204
3326	chr14	76939792	76940791	+	0	NA	intron (NM_004452, intron 5 of 10)	intron (NM_004452, intron 5 of 10)	102601	NM_004452	2103	Hs.435845	NM_004452	ENSG00000119715	ESRRB	DFNB35|ERR2|ERRb|ESRL2|NR3B2	estrogen related receptor beta	protein-coding	ESRRB	-	-	ESRRB	ESRRB	TSS22709	chr14:76837689-76968180	-	-	0	0	0	OK	0	0	0	OK	0	0	0	OK	0	0	0	OK	0	0	0	OK	0	0
5433	chr19	13943245	13945084	+	0	NA	Intergenic	CpG	2939	NR_036515	284454	Hs.436426	NR_036515	ENSG00000267519	LOC284454	-	uncharacterized LOC284454	ncRNA	LOC284454	-	-	LOC284454	LOC284454	TSS2007	chr19:13945329-13947173	-	-	7.99597	5.98709	10.0049	OK	8.13829	6.11826	10.1583	OK	6.22947	4.60213	7.8568	OK	4.67896	3.35569	6.00224	OK	9.81164	7.48572	12.1376	OK	11.7057	9.0343
2654	chr8	97351006	97352005	+	0	NA	Intergenic	Intergenic	47371	NR_125829	102724804	Hs.571415	NR_125828	ENSG00000253105	LOC102724804	-	uncharacterized LOC102724804	ncRNA
4209	chr12	53492859	53493858	+	0	NA	intron (NM_002178, intron 1 of 3)	intron (NM_002178, intron 1 of 3)	1922	NM_002178	3489	Hs.274313	NM_002178	ENSG00000167779	IGFBP6	IBP6	insulin like growth factor binding protein 6	protein-coding	IGFBP6	-	-	IGFBP6	IGFBP6	TSS20988	chr12:53491435-53496128	-	-	137.362	112.605	162.118	OK	101.692	83.011	120.372	OK	160.612	132.725	188.498	OK	107.926	88.3325	127.519	OK	76.8019	62.2074	91.3963	OK	134.017	110.119
4144	chr2	152114502	152115501	+	0	NA	intron (NM_198557, intron 1 of 3)	AluJb|SINE|Alu	3388	NM_198557	375287	Hs.302442	NM_198557	ENSG00000184898	RBM43	C2orf38	RNA binding motif protein 43	protein-coding	RBM43	-	-	RBM43	RBM43	TSS23646	chr2:152104727-152118389	-	-	0.113575	0.0173841	0.209766	OK	0.37258	0.188383	0.556778	OK	0.270697	0.11497	0.426424	OK	0.548827	0.316484	0.78117	OK	0.219715	0.0873319	0.352098	OK	0.450308	0.244174
4784	chr18	58289755	58290754	+	0	NA	Intergenic	Intergenic	-250253	NM_005912	4160	Hs.532833	NM_005912	ENSG00000166603	MC4R	-	melanocortin 4 receptor	protein-coding	MC4R	-	-	MC4R	MC4R	TSS18924	chr18:58038563-58040001	-	-	0.207106	0	0.425546	OK	0.170959	0	0.371593	OK	0.176812	0	0.376094	OK	0.321337	0.0576989	0.584976	OK	1.39652	0.795481	1.99756	OK	0.124595	0
3627	chr17	8092707	8093706	+	0	NA	exon (NM_017622, exon 1 of 1)	exon (NM_017622, exon 1 of 1)	358	NM_017622	54785	Hs.129563	NM_017622	ENSG00000196544	BORCS6	C17orf59|PRO2472	BLOC-1 related complex subunit 6	protein-coding
39	chr6	158475541	158476540	+	0	NA	exon (NM_001178088, exon 5 of 26)	exon (NM_001178088, exon 5 of 26)	37960	NM_001178088	8871	Hs.434494	NM_003898	ENSG00000078269	SYNJ2	INPP5H	synaptojanin 2	protein-coding
5907	chr17	672686	673685	+	0	NA	exon (NM_016080, exon 8 of 9)	exon (NM_016080, exon 8 of 9)	-12384	NM_001317947	55178	Hs.182729	NM_018146	ENSG00000171861	MRM3	RMTL1|RNMTL1	mitochondrial rRNA methyltransferase 3	protein-coding
558	chr17	15848840	15849839	+	0	NA	intron (NM_000676, intron 1 of 1)	CpG	1108	NM_000676	136	Hs.167046	NM_000676	ENSG00000170425	ADORA2B	ADORA2	adenosine A2b receptor	protein-coding	ADORA2B	-	-	ADORA2B	ADORA2B	TSS25598	chr17:15848230-15879210	-	-	57.1802	47.0696	67.2908	OK	77.0279	63.8235	90.2323	OK	60.6605	50.0644	71.2566	OK	91.4617	75.968	106.955	OK	53.2224	43.7857	62.6592	OK	134.522	112.287
3200	chr16	66546112	66547111	+	0	NA	intron (NM_004614, intron 9 of 9)	AluSz6|SINE|Alu	-36306	NR_109960	101927726	Hs.739193	NR_109960	ENSG00000261656	BEAN1-AS1	CTD-2258A20.5	BEAN1 antisense RNA 1	ncRNA	BEAN1-AS1	-	-	BEAN1-AS1	BEAN1-AS1	TSS17672	chr16:66461199-66527432	-	-	0	0	0	OK	0	0	0	OK	0	0	0	OK	0	0	0	OK	0	0	0	OK	0	0
5443	chr12	103699427	103700426	+	0	NA	exon (NM_001278420, exon 6 of 7)	exon (NM_001278420, exon 6 of 7)	154306	NR_126333	101929058	Hs.171310	NR_126333	ENSG00000257860	LOC101929058	-	uncharacterized LOC101929058	ncRNA	LOC101929058	-	-	LOC101929058	LOC101929058	TSS13730	chr12:103545619-103562086	-	-	0	0	0	OK	0	0	0	OK	0	0	0	OK	0	0	0	OK	0	0	0	OK	0	0
5503	chr13	36636006	36637005	+	0	NA	intron (NM_001330071, intron 3 of 16)	L2a|LINE|L2	69009	NM_001330071	9201	Hs.507755	NM_004734	ENSG00000133083	DCLK1	CL1|CLICK1|DCAMKL1|DCDC3A|DCLK	doublecortin like kinase 1	protein-coding
5536	chr7	127906650	127907649	+	0	NA	Intergenic	Intergenic	25818	NM_000230	3952	Hs.194236	NM_000230	ENSG00000174697	LEP	LEPD|OB|OBS	leptin	protein-coding	LEP	-	-	LEP	LEP	TSS8641	chr7:127881330-127897682	-	-	0	0	0	OK	0.0413581	0	0.111664	OK	0.00595227	0	0.0431445	OK	0.0111573	0	0.048409	OK	0.00553871	0	0.043009	OK	0.0272123	0
573	chr1	205149311	205150310	+	0	NA	intron (NM_015375, intron 2 of 12)	AluJb|SINE|Alu	30917	NM_015375	25778	Hs.6874	NM_015375	ENSG00000133059	DSTYK	CAKUT1|DustyPK|HDCMD38P|RIP5|RIPK5	dual serine/threonine and tyrosine protein kinase	protein-coding	DSTYK	-	-	DSTYK	DSTYK	TSS26482	chr1:205111630-205180727	-	-	4.6941	3.77606	5.61215	OK	5.44552	4.39607	6.49497	OK	4.43689	3.55433	5.31945	OK	4.06334	3.23794	4.88875	OK	5.2585	4.23843	6.27858	OK	6.87591	5.5956
2710	chr7	154917637	154918636	+	0	NA	Intergenic	Intergenic	-54869	NR_038945	100128264	Hs.248137	NR_038945	ENSG00000220575	HTR5A-AS1	HTR5AOS	HTR5A antisense RNA 1	ncRNA	HTR5A-AS1	-	-	HTR5A-AS1	HTR5A-AS1	TSS251	chr7:154858778-154879102	-	-	0	0	0	OK	0	0	0	OK	0	0	0	OK	0	0	0	OK	0	0	0	OK	0	0
1084	chr1	10534490	10535489	+	0	NA	promoter-TSS (NM_004565)	promoter-TSS (NM_004565)	-14	NM_004565	5195	Hs.149983	NM_004565	ENSG00000142655	PEX14	NAPP2|PBD13A|Pex14p|dJ734G22.2	peroxisomal biogenesis factor 14	protein-coding	PEX14	-	-	PEX14	PEX14	TSS511	chr1:10535002-10690815	-	-	3.47313	2.37125	4.57502	OK	4.26218	3.01353	5.51083	OK	4.76022	3.44703	6.0734	OK	5.08431	3.67723	6.49138	OK	5.59849	4.07881	7.11816	OK	5.16897	3.73252
6101	chr6	170604636	170605635	+	0	NA	intron (NM_001286380, intron 1 of 10)	CpG	726	NM_001286380	84498	Hs.369522	NM_032448	ENSG00000112584	FAM120B	CCPG|KIAA1838|PGCC1|dJ894D12.1	family with sequence similarity 120B	protein-coding
4570	chr9	19662582	19663581	+	0	NA	intron (NM_001193288, intron 1 of 8)	intron (NM_001193288, intron 1 of 8)	123936	NM_020344	25769	Hs.283014	NM_020344	ENSG00000155886	SLC24A2	NCKX2	solute carrier family 24 member 2	protein-coding	SLC24A2	-	-	SLC24A2	SLC24A2	TSS26191	chr9:19507449-19787017	-	-	0	0	0	OK	0.00166978	0	0.018098	OK	0	0	0	OK	0	0	0	OK	0	0	0	OK	0.00181218	0
5324	chr11	75910228	75911227	+	0	NA	intron (NM_004626, intron 1 of 4)	AluSc|SINE|Alu	6847	NM_004626	7481	Hs.108219	NM_004626	ENSG00000085741	WNT11	HWNT11	Wnt family member 11	protein-coding	WNT11	-	-	WNT11	WNT11	TSS9263	chr11:75897369-75917574	-	-	0.0279706	0	0.107135	OK	0.185937	0.00112071	0.370753	OK	0	0	0	OK	0.154291	0	0.316671	OK	0.230536	0.0100051	0.451067	OK	0.420883	0.128546
3446	chr11	36703722	36704721	+	0	NA	Intergenic	L2c|LINE|L2	-84392	NM_001243786	5897	Hs.714519	NM_000536	ENSG00000175097	RAG2	RAG-2	recombination activating 2	protein-coding
638	chr3	197121276	197122275	+	0	NA	Intergenic	Intergenic	-95632	NM_001290983	1739	Hs.292549	NM_004087	ENSG00000075711	DLG1	DLGH1|SAP-97|SAP97|dJ1061C18.1.1|hdlg	discs large MAGUK scaffold protein 1	protein-coding
2350	chr19	58873666	58874665	+	0	NA	promoter-TSS (NM_001207009)	promoter-TSS (NM_001207009)	49	NM_001207009	162968	Hs.447840	NM_198458	ENSG00000174586	ZNF497	-	zinc finger protein 497	protein-coding
2479	chr5	99162745	99163744	+	0	NA	Intergenic	Tigger2|DNA|TcMar-Tigger	293550	NR_110562	102724855	Hs.519477	NR_110562		LINC02113	CTD-2151A2.1	long intergenic non-protein coding RNA 2113	ncRNA
1	chr10	97415872	97416871	+	0	NA	promoter-TSS (NM_001323414)	promoter-TSS (NM_001323414)	-92	NM_001323414	5832	Hs.500645	NM_002860	ENSG00000059573	ALDH18A1	ADCL3|ARCL3A|GSAS|P5CS|PYCS|SPG9|SPG9A|SPG9B	aldehyde dehydrogenase 18 family member A1	protein-coding
3218	chr11	789587	790586	+	0	NA	promoter-TSS (NM_016564)	promoter-TSS (NM_016564)	40	NM_016564	51286	Hs.22140	NM_016564	ENSG00000184524	CEND1	BM88	cell cycle exit and neuronal differentiation 1	protein-coding	CEND1	-	-	CEND1	CEND1	TSS9613	chr11:787109-790126	-	-	0.129765	0	0.343051	OK	0.0505969	0	0.155472	OK	0.192208	0	0.404459	OK	0.128157	0	0.331596	OK	0.245985	0.00877781	0.483192	OK	0.371226	0.0633398
506	chr7	100764884	100765883	+	0	NA	Intergenic	Intergenic	-4987	NM_000602	5054	Hs.414795	NM_000602	ENSG00000106366	SERPINE1	PAI|PAI-1|PAI1|PLANH1	serpin family E member 1	protein-coding	SERPINE1	-	-	SERPINE1	SERPINE1	TSS30088	chr7:100770369-100782547	-	-	4599.54	3711.99	5487.1	OK	1225.1	1027.95	1422.25	OK	2390.94	1986.77	2795.12	OK	880.222	739.984	1020.46	OK	2899.22	2408.75	3389.7	OK	599.303	504.243
5929	chr6	125970111	125971110	+	0	NA	Intergenic	Intergenic	-24889	NR_038906	643623	Hs.520367	NR_038906	ENSG00000224506	LOC643623	-	uncharacterized LOC643623	ncRNA	LOC643623	-	-	LOC643623	LOC643623	TSS868	chr6:125995498-126041364	-	-	0	0	0	OK	0	0	0	OK	0	0	0	OK	0	0	0	OK	0	0	0	OK	0	0
5554	chr3	160523217	160524216	+	0	NA	intron (NM_139245, intron 1 of 3)	MER102c|DNA|hAT-Charlie	-36285	NM_001317912	151742	Hs.389027	NM_139245	ENSG00000163590	PPM1L	PP2C-epsilon|PP2CE|PPM1-LIKE	protein phosphatase, Mg2+/Mn2+ dependent 1L	protein-coding
4184	chr17	5019166	5020165	+	0	NA	promoter-TSS (NM_001304284)	promoter-TSS (NM_001304284)	-68	NM_001304284	9098	Hs.448851	NM_004505	ENSG00000129204	USP6	HRP1|TRE17|TRE2|TRESMCR|Tre-2|USP6-short	ubiquitin specific peptidase 6	protein-coding
2937	chr1	33721739	33722738	+	0	NA	promoter-TSS (NM_152493)	promoter-TSS (NM_152493)	64	NM_152493	149076	Hs.743358	NM_152493	ENSG00000160094	ZNF362	RN|lin-29	zinc finger protein 362	protein-coding	ZNF362	-	-	ZNF362	ZNF362	TSS27786	chr1:33722173-33766320	-	-	3.60629	2.63811	4.57448	OK	5.04503	3.82181	6.26826	OK	3.77181	2.80403	4.7396	OK	5.00625	3.79214	6.22036	OK	5.44741	4.14321	6.75162	OK	7.3056	5.6638
661	chr1	92202272	92203271	+	0	NA	intron (NR_036634, intron 5 of 17)	intron (NR_036634, intron 5 of 17)	149065	NM_003243	7049	Hs.482390	NM_003243	ENSG00000069702	TGFBR3	BGCAN|betaglycan	transforming growth factor beta receptor 3	protein-coding	TGFBR3	-	-	TGFBR3	TGFBR3	TSS19699,TSS24499	chr1:92145899-92371559	-	-	4.05952	3.21594	4.9031	OK	4.64967	3.69733	5.60202	OK	7.44423	6.01822	8.87024	OK	3.59184	2.81531	4.36836	OK	1.86679	1.40987	2.32372	OK	2.24461	1.71927
3157	chr3	197417980	197418979	+	0	NA	intron (NM_001346873, intron 12 of 21)	intron (NM_001346873, intron 12 of 21)	-17032	NR_030627	100126321		NR_030627	ENSG00000145016	MIR922	MIRN922|hsa-mir-922	microRNA 922	ncRNA	MIR922	-	-	MIR922	MIR922	TSS20105	chr3:197398264-197511317	-	-	0	0	0	OK	0	0	0	OK	0	0	0	OK	9.23e-120	0	2.38173	OK	2.32583	0	10.2657	OK	0	0
2845	chr12	93191728	93192727	+	0	NA	intron (NM_003566, intron 21 of 28)	AluSx|SINE|Alu	61962	NM_001004330	440107	Hs.591013	NM_001004330	ENSG00000187510	PLEKHG7	-	pleckstrin homology and RhoGEF domain containing G7	protein-coding	PLEKHG7	-	-	PLEKHG7	PLEKHG7	TSS12827	chr12:93130264-93165868	-	-	0.035237	0	0.0874825	OK	0.0257118	0	0.0877036	OK	0.00747986	0	0.0483914	OK	0	0	0	OK	0.0260013	0	0.0894183	OK	0.0134927	0
2482	chr19	39156492	39157491	+	0	NA	intron (NM_001322033, intron 1 of 20)	intron (NM_001322033, intron 1 of 20)	18735	NM_004924	81	Hs.270291	NM_004924	ENSG00000130402	ACTN4	ACTININ-4|FSGS|FSGS1	actinin alpha 4	protein-coding	ACTN4	-	-	ACTN4	ACTN4	TSS33211	chr19:39138266-39235114	-	-	76.4538	63.852	89.0555	OK	67.9155	56.7009	79.1301	OK	59.3139	49.5137	69.1141	OK	55.3197	46.0949	64.5444	OK	109.798	92.0584	127.538	OK	52.826	44.0051
2719	chr6	15697174	15698173	+	0	NA	Intergenic	L1ME4a|LINE|L1	-34384	NM_001271669	84062	Hs.571148	NM_032122	ENSG00000047579	DTNBP1	BLOC1S8|DBND|HPS7|My031|SDY	dystrobrevin binding protein 1	protein-coding
1935	chr4	7905456	7906455	+	0	NA	intron (NM_001134647, intron 1 of 17)	intron (NM_001134647, intron 1 of 17)	-34773	NM_203423	389199	Hs.375210	NM_203423		LOC389199	-	uncharacterized LOC389199	protein-coding	LOC389199	-	-	LOC389199	LOC389199	TSS23148	chr4:7755816-7942023	-	-	0.663671	0	3.93634	OK	1.04682	0	3.99901	OK	1.36603	0	5.70164	OK	1.9655	0	6.75119	OK	1.49588	0	5.73382	OK	0.969437	0
2690	chr7	157190655	157191654	+	0	NA	intron (NM_058246, intron 8 of 9)	intron (NM_058246, intron 8 of 9)	61443	NM_058246	10049	Hs.490745	NM_005494	ENSG00000105993	DNAJB6	DJ4|DnaJ|HHDJ1|HSJ-2|HSJ2|LGMD1D|LGMD1E|MRJ|MSJ-1	DnaJ heat shock protein family (Hsp40) member B6	protein-coding
581	chr22	39189553	39190552	+	0	NA	intron (NM_005740, intron 1 of 3)	CpG	109	NM_005740	10126	Hs.632766	NM_005740	ENSG00000100246	DNAL4	MRMV3|PIG27	dynein axonemal light chain 4	protein-coding	DNAL4	-	-	DNAL4	DNAL4	TSS15986	chr22:39174512-39190161	-	-	3.67389	2.44579	4.90199	OK	6.83482	4.96702	8.70261	OK	5.09491	3.60946	6.58035	OK	6.65475	4.83245	8.47705	OK	4.51123	3.11462	5.90783	OK	8.28335	6.1177
2727	chr7	134463724	134464723	+	0	NA	promoter-TSS (NM_004342)	promoter-TSS (NM_004342)	59	NM_033157	800	Hs.490203	NM_004342	ENSG00000122786	CALD1	CDM|H-CAD|HCAD|L-CAD|LCAD|NAG22	caldesmon 1	protein-coding
4046	chr12	120728969	120729968	+	0	NA	Intergenic	Intergenic	-10656	NM_012240	23409	Hs.50861	NM_012240	ENSG00000089163	SIRT4	SIR2L4	sirtuin 4	protein-coding	SIRT4	-	-	SIRT4	SIRT4	TSS23531	chr12:120740123-120751045	-	-	0.765617	0.261358	1.26988	OK	1.47629	0.744825	2.20776	OK	0.602592	0.172118	1.03307	OK	1.53866	0.808655	2.26866	OK	0.775253	0.274318	1.27619	OK	2.80416	1.72332
4676	chr2	191398884	191399883	+	0	NA	promoter-TSS (NM_001142645)	promoter-TSS (NM_001142645)	85	NM_001142645	100131211	Hs.659824	NM_001142645	ENSG00000189362	NEMP2	TMEM194B	nuclear envelope integral membrane protein 2	protein-coding	NEMP2	-	-	NEMP2	NEMP2	TSS28177	chr2:191371618-191399468	-	-	2.80846	2.08802	3.5289	OK	2.12925	1.53758	2.72091	OK	3.04096	2.25707	3.82485	OK	2.17307	1.5725	2.77364	OK	1.79153	1.26797	2.31509	OK	0.948983	0.615942
4200	chr11	86270004	86271003	+	0	NA	intron (NM_001014811, intron 2 of 13)	intron (NM_001014811, intron 2 of 13)	112737	NM_001014811	10873	Hs.199743	NM_006680	ENSG00000151376	ME3	NADP-ME	malic enzyme 3	protein-coding
4567	chr20	19655328	19656327	+	0	NA	intron (NM_020689, intron 9 of 16)	intron (NM_020689, intron 9 of 16)	-211338	NM_001242581	54453	Hs.472270	NM_018993	ENSG00000132669	RIN2	MACS|RASSF4	Ras and Rab interactor 2	protein-coding
678	chr8	96146400	96147399	+	0	NA	intron (NM_024613, intron 1 of 1)	intron (NM_024613, intron 1 of 1)	950	NM_024613	79666	Hs.29724	NM_024613	ENSG00000175895	PLEKHF2	EAPF|PHAFIN2|ZFYVE18	pleckstrin homology and FYVE domain containing 2	protein-coding	PLEKHF2	-	-	PLEKHF2	PLEKHF2	TSS25745	chr8:96145948-96168913	-	-	10.2454	8.12565	12.3652	OK	11.4227	9.07684	13.7686	OK	13.5925	10.8384	16.3466	OK	11.4098	9.06888	13.7507	OK	11.3504	9.03336	13.6675	OK	7.97563	6.23655
6676	chr3	196696099	196697098	+	0	NA	promoter-TSS (NM_025163)	promoter-TSS (NM_025163)	-856	NM_025163	80235	Hs.518403	NM_025163	ENSG00000119227	PIGZ	GPI-MT-IV|PIG-Z|SMP3	phosphatidylinositol glycan anchor biosynthesis class Z	protein-coding	PIGZ	-	-	PIGZ	PIGZ	TSS4737	chr3:196673213-196695742	-	-	1.37402	0.880405	1.86764	OK	2.01454	1.37952	2.64957	OK	1.33345	0.867575	1.79932	OK	1.86126	1.26899	2.45352	OK	1.37446	0.890651	1.85826	OK	2.16772	1.49925
4328	chr1	92902171	92903170	+	0	NA	Intergenic	AluJo|SINE|Alu	46686	NM_001127215	2672	Hs.73172	NM_005263	ENSG00000162676	GFI1	GFI-1|GFI1A|SCN2|ZNF163	growth factor independent 1 transcriptional repressor	protein-coding
6709	chr6	52441751	52442750	+	0	NA	promoter-TSS (NM_012288)	promoter-TSS (NM_012288)	154	NR_103447	401264	Hs.544586	NR_103446	ENSG00000225791	TRAM2-AS1	-	TRAM2 antisense RNA 1 (head to head)	ncRNA
3862	chr7	130789990	130790989	+	0	NA	intron (NR_109854, intron 2 of 5)	CpG	1300	NR_024153	378805	Hs.150556	NM_001085379	ENSG00000231721	LINC-PINT	LincRNA-Pint|MKLN1-AS1|PINT	long intergenic non-protein coding RNA, p53 induced transcript	ncRNA
1517	chr11	62554031	62555030	+	0	NA	promoter-TSS (NM_199337)	promoter-TSS (NM_199337)	-344	NM_199337	374395	Hs.381134	NM_199337	ENSG00000185475	TMEM179B	-	transmembrane protein 179B	protein-coding	TMEM179B	-	-	TMEM179B	TMEM179B	TSS24231	chr11:62554873-62559486	-	-	96.3569	77.6202	115.094	OK	104.082	83.8819	124.281	OK	123.985	100.31	147.66	OK	117.615	95.059	140.17	OK	95.6618	76.9498	114.374	OK	148.102	121.165
6097	chr3	183947850	183948849	+	0	NA	exon (NM_138345, exon 1 of 19)	exon (NM_138345, exon 1 of 19)	132	NM_138345	90113	Hs.584997	NM_138345	ENSG00000145198	VWA5B2	-	von Willebrand factor A domain containing 5B2	protein-coding	VWA5B2	-	-	VWA5B2	VWA5B2	TSS25300	chr3:183948316-183967313	-	-	0.0181914	0	0.150181	OK	0.0112262	0	0.104461	OK	0.0166939	0	0.153765	OK	0.0166993	0	0.153517	OK	0.0306347	0	0.207573	OK	0.0460878	0
6780	chr8	128750412	128751411	+	0	NA	exon (NM_002467, exon 2 of 3)	exon (NM_002467, exon 2 of 3)	2596	NM_002467	4609	Hs.202453	NM_002467	ENSG00000136997	MYC	MRTL|MYCC|bHLHe39|c-Myc	v-myc avian myelocytomatosis viral oncogene homolog	protein-coding	MYC	-	-	MYC	MYC	TSS26937	chr8:128748314-128753680	-	-	61.2923	50.598	71.9867	OK	57.8784	47.7818	67.975	OK	92.4295	76.8956	107.963	OK	95.4938	79.459	111.529	OK	58.2087	48.0499	68.3676	OK	36.6766	29.937
2808	chr3	15918924	15919923	+	0	NA	Intergenic	Intergenic	4145	NR_030289	693148		NR_030289	ENSG00000207815	MIR563	MIRN563|hsa-mir-563	microRNA 563	ncRNA	MIR563	-	-	MIR563	MIR563	TSS16669	chr3:15915277-15915356	-	-	0	0	0	OK	0	0	0	OK	0	0	0	OK	0	0	0	OK	0	0	0	OK	0	0
3025	chr21	35828204	35829203	+	0	NA	promoter-TSS (NM_001127670)	promoter-TSS (NM_001127670)	-596	NM_001127670	3753	Hs.121495	NM_000219	ENSG00000180509	KCNE1	ISK|JLNS|JLNS2|LQT2/5|LQT5|MinK	potassium voltage-gated channel subfamily E regulatory subunit 1	protein-coding
1975	chr2	97225273	97226272	+	0	NA	Intergenic	MIRb|SINE|MIR	22156	NM_001319092	10865	Hs.920	NM_006673	ENSG00000196843	ARID5A	MRF-1|MRF1|RP11-363D14	AT-rich interaction domain 5A	protein-coding
2910	chr17	47573459	47574458	+	0	NA	intron (NM_002507, intron 1 of 5)	CpG	1303	NM_002507	4804	Hs.415768	NM_002507	ENSG00000064300	NGFR	CD271|Gp80-LNGFR|TNFRSF16|p75(NTR)|p75NTR	nerve growth factor receptor	protein-coding	NGFR	-	-	NGFR	NGFR	TSS18628	chr17:47572654-47651426	-	-	0.0573999	0	0.140365	OK	0.105385	0.00465416	0.206115	OK	0.00649765	0	0.0443895	OK	0.168916	0.0396698	0.298162	OK	0.0828028	0	0.177559	OK	0.121038	0.0088083
1973	chr11	129491837	129492836	+	0	NA	Intergenic	Intergenic	-5172	NR_120582	101929557	Hs.385785	NR_120582	ENSG00000281097	LINC01395	-	long intergenic non-protein coding RNA 1395	ncRNA	LINC01395	-	-	LINC01395	LINC01395	TSS29956	chr11:129482015-129487164	-	-	0	0	0	OK	0	0	0	OK	0	0	0	OK	0	0	0	OK	0	0	0	OK	0	0
1991	chr13	96328937	96329936	+	0	NA	promoter-TSS (NR_132117)	promoter-TSS (NR_132117)	43	NM_006260	5611	Hs.59214	NM_006260	ENSG00000102580	DNAJC3	ACPHD|ERdj6|HP58|P58|P58IPK|PRKRI	DnaJ heat shock protein family (Hsp40) member C3	protein-coding	DNAJC3	-	-	DNAJC3	DNAJC3	TSS31438	chr13:96329392-96447243	-	-	17.2053	14.2049	20.2057	OK	11.986	9.7911	14.1809	OK	17.7704	14.6361	20.9048	OK	10.3646	8.43774	12.2914	OK	13.2794	10.8894	15.6695	OK	12.7694	10.4525
927	chr16	88698297	88699296	+	0	NA	TTS (NM_001294340)	TTS (NM_001294340)	-6205	NM_013278	27189	Hs.278911	NM_013278	ENSG00000124391	IL17C	CX2|IL-17C	interleukin 17C	protein-coding	IL17C	-	-	IL17C	IL17C	TSS26355	chr16:88705000-88706882	-	-	0.0286146	0	0.166719	OK	0	0	0	OK	0	0	0	OK	0	0	0	OK	0	0	0	OK	0	0
5475	chr18	20254667	20255666	+	0	NA	Intergenic	MER70A|LTR|ERVL	111634	NR_110782	101927571	Hs.335020	NR_110782	ENSG00000266850	LOC101927571	-	uncharacterized LOC101927571	ncRNA	LOC101927571	-	-	LOC101927571	LOC101927571	TSS33013	chr18:20303453-20366800	-	-	1.79062	0	4.09262	OK	2.66777	0	5.62408	OK	0.555541	0	1.23606	OK	1.50901	0	3.39804	OK	1.94552	0	4.06308	OK	2.89015	0.0700675
6797	chrX	3264178	3265177	+	0	NA	promoter-TSS (NM_015419)	promoter-TSS (NM_015419)	7	NM_015419	25878	Hs.369422	NM_015419	ENSG00000101825	MXRA5	-	matrix remodeling associated 5	protein-coding	MXRA5	-	-	MXRA5	MXRA5	TSS5223	chrX:3226608-3264684	-	-	0	0	0	OK	0	0	0	OK	0	0	0	OK	0	0	0	OK	0	0	0	OK	0.00801883	0
5855	chr14	75093709	75094708	+	0	NA	Intergenic	AluSz6|SINE|Alu	-15174	NM_000428	4053	Hs.512776	NM_000428	ENSG00000119681	LTBP2	C14orf141|GLC3D|LTBP3|MSPKA|MSTP031|WMS3	latent transforming growth factor beta binding protein 2	protein-coding	LTBP2	-	-	LTBP2	LTBP2	TSS26019	chr14:74964885-75079034	-	-	21.9635	18.2754	25.6515	OK	15.9079	13.1985	18.6172	OK	48.7965	40.9483	56.6447	OK	41.3415	34.6557	48.0273	OK	9.14969	7.50381	10.7956	OK	15.2411	12.6347
3180	chr7	38268623	38269622	+	0	NA	intron (NM_032016, intron 8 of 8)	intron (NM_032016, intron 8 of 8)	44126	NM_001003806	445347	Hs.534032	NM_001003799		TARP	CD3G|TCRG|TCRGC1|TCRGC2|TCRGV	TCR gamma alternate reading frame protein	protein-coding
2302	chr6	34026874	34027873	+	0	NA	intron (NM_001256813, intron 4 of 10)	intron (NM_001256813, intron 4 of 10)	46386	NM_001256813	2914	Hs.429018	NM_000841	ENSG00000124493	GRM4	GPRC1D|MGLUR4|mGlu4	glutamate metabotropic receptor 4	protein-coding
4827	chr20	20086464	20087463	+	0	NA	intron (NM_001167816, intron 7 of 12)	intron (NM_001167816, intron 7 of 12)	49673	NM_001167816	26074	Hs.729168	NM_015585	ENSG00000089101	CFAP61	C20orf26|CaM-IP3|dJ1002M8.3|dJ1178H5.4	cilia and flagella associated protein 61	protein-coding
3849	chr20	33893259	33894258	+	0	NA	intron (NM_199487, intron 8 of 8)	intron (NM_199487, intron 8 of 8)	-13533	NM_178468	128876	Hs.592149	NM_178468	ENSG00000125998	FAM83C	C20orf128|dJ614O4.7	family with sequence similarity 83 member C	protein-coding	FAM83C	-	-	FAM83C	FAM83C	TSS24984	chr20:33873053-33880225	-	-	0.00682254	0	0.0482603	OK	0.00675816	0	0.0478928	OK	0	0	0	OK	0.00644272	0	0.0476593	OK	0.00670995	0	0.0488018	OK	0.00809787	0
2745	chr10	70091998	70092997	+	0	NA	promoter-TSS (NM_001322449)	promoter-TSS (NM_001322449)	-73	NM_001322449	3189	Hs.643472	NM_012207	ENSG00000096746	HNRNPH3	2H9|HNRPH3	heterogeneous nuclear ribonucleoprotein H3	protein-coding
652	chr11	76493948	76494947	+	0	NA	promoter-TSS (NR_120561)	promoter-TSS (NR_120561)	162	NM_015516	25987	Hs.8361	NM_015516	ENSG00000182704	TSKU	E2IG4|LRRC54|TSK	tsukushi, small leucine rich proteoglycan	protein-coding	TSKU	-	-	TSKU	TSKU	TSS10993,TSS15965	chr11:76493356-76509198	-	-	8.73818	6.75931	10.7171	OK	11.9319	9.43701	14.4267	OK	12.1201	9.61936	14.6209	OK	14.3898	11.4893	17.2904	OK	10.583	8.31016	12.8559	OK	23.0118	18.6653
2400	chr12	115370978	115371977	+	0	NA	Intergenic	Intergenic	-249508	NM_005996	6926	Hs.744016	NM_005996	ENSG00000135111	TBX3	TBX3-ISO|UMS|XHL	T-box 3	protein-coding	TBX3	-	-	TBX3	TBX3	TSS13902	chr12:115108058-115121969	-	-	3.43448	2.57974	4.28923	OK	6.4372	5.04455	7.82985	OK	3.22955	2.41169	4.04741	OK	4.75851	3.65023	5.8668	OK	2.76271	2.03454	3.49087	OK	4.79767	3.68235
2034	chr14	100751464	100752463	+	0	NA	Intergenic	CpG	8269	NR_106822	102466730		NR_106822	ENSG00000100811	MIR6764	hsa-mir-6764	microRNA 6764	ncRNA	MIR6764	-	-	MIR6764	MIR6764	TSS32343	chr14:100705101-100745371	-	-	0	0	0	OK	0	0	0	OK	0	0	0	OK	0	0	0	OK	0	0	0	OK	0	0
4445	chr17	7475917	7476916	+	0	NA	intron (NM_001204510, intron 1 of 10)	CpG	392	NM_001204510	1973	Hs.129673	NM_001416	ENSG00000161960	EIF4A1	DDX2A|EIF-4A|EIF4A|eIF-4A-I|eIF4A-I	eukaryotic translation initiation factor 4A1	protein-coding
4405	chr11	35187825	35188824	+	0	NA	intron (NM_001202556, intron 1 of 7)	intron (NM_001202556, intron 1 of 7)	27907	NM_001202556	960	Hs.502328	NM_000610	ENSG00000026508	CD44	CDW44|CSPG8|ECMR-III|HCELL|HUTCH-I|IN|LHR|MC56|MDU2|MDU3|MIC4|Pgp1	CD44 molecule (Indian blood group)	protein-coding
3851	chr10	77118613	77119612	+	0	NA	intron (NR_038225, intron 3 of 3)	intron (NR_038225, intron 3 of 3)	-42174	NR_024421	100131213	Hs.534598	NR_024421	ENSG00000237149	ZNF503-AS2	C10orf41|NCRNA00245	ZNF503 antisense RNA 2	ncRNA	ZNF503-AS2	-	-	ZNF503-AS2	ZNF503-AS2	TSS11730,TSS21557,TSS28931,TSS34062,TSS7216,TSS9626	chr10:77039483-77168740	-	-	2.03487	0.899322	3.17042	OK	2.55733	1.13723	3.97743	OK	1.16618	0.381134	1.95123	OK	2.01573	1.00228	3.02919	OK	2.46043	1.10557	3.81529	OK	7.12088	4.55721
2029	chr10	135186397	135187396	+	0	NA	promoter-TSS (NM_004092)	promoter-TSS (NM_004092)	12	NM_004092	1892	Hs.76394	NM_004092	ENSG00000127884	ECHS1	ECHS1D|SCEH	enoyl-CoA hydratase, short chain 1	protein-coding	ECHS1	-	-	ECHS1	ECHS1	TSS32719	chr10:135175986-135186908	-	-	140.584	116.762	164.405	OK	146.736	121.959	171.513	OK	152.447	126.841	178.053	OK	186.464	155.533	217.395	OK	148.557	123.523	173.592	OK	166.249	138.452
3552	chr7	158865940	158866939	+	0	NA	intron (NR_130758, intron 4 of 12)	intron (NR_130758, intron 4 of 12)	23456	NM_001308259	7434	Hs.585052	NM_003382	ENSG00000106018	VIPR2	C16DUPq36.3|DUP7q36.3|PACAP-R-3|PACAP-R3|VIP-R-2|VPAC2|VPAC2R|VPCAP2R	vasoactive intestinal peptide receptor 2	protein-coding
5671	chr4	16877161	16878160	+	0	NA	intron (NM_001130834, intron 1 of 8)	intron (NM_001130834, intron 1 of 8)	22772	NM_001290	9079	Hs.714330	NM_001290	ENSG00000169744	LDB2	CLIM1|LDB-2|LDB1	LIM domain binding 2	protein-coding	LDB2	-	-	LDB2	LDB2	TSS21585	chr4:16503156-16900432	-	-	5.15442	3.88989	6.41895	OK	4.96499	3.7053	6.22467	OK	17.2165	13.7323	20.7007	OK	10.8517	8.5775	13.1259	OK	1.80844	1.19722	2.41967	OK	4.11397	2.96498
844	chr20	36738094	36739093	+	0	NA	Intergenic	Intergenic	55238	NM_004613	7052	Hs.517033	NM_004613	ENSG00000198959	TGM2	TG(C)|TGC	transglutaminase 2	protein-coding	TGM2	-	-	TGM2	TGM2	TSS17373	chr20:36756863-36793700	-	-	23.7042	19.0928	28.3156	OK	20.5398	16.3572	24.7224	OK	18.4833	14.9249	22.0417	OK	39.0527	32.235	45.8703	OK	60.4679	50.0405	70.8953	OK	96.291	80.5227
4447	chr22	38950116	38951115	+	0	NA	intron (NM_007068, intron 6 of 13)	FLAM_C|SINE|Alu	13799	NM_001278208	11144	Hs.339396	NM_007068	ENSG00000100206	DMC1	DMC1H|LIM15|dJ199H16.1	DNA meiotic recombinase 1	protein-coding
5767	chr12	11799850	11800849	+	0	NA	Intergenic	Intergenic	-2439	NM_001987	2120	Hs.504765	NM_001987	ENSG00000139083	ETV6	TEL|TEL/ABL|THC5	ETS variant 6	protein-coding	ETV6	-	-	ETV6	ETV6	TSS8803	chr12:11802787-12079107	-	-	4.19145	3.3015	5.0814	OK	4.4012	3.46684	5.33555	OK	2.55895	1.95282	3.16507	OK	3.82664	2.99818	4.65511	OK	6.91049	5.55698	8.26399	OK	5.50637	4.38835
4552	chr2	232506345	232507344	+	0	NA	Intergenic	Intergenic	49269	NM_152614	165100	Hs.98104	NM_152614	ENSG00000177673	TEX44	C2orf57	testis expressed 44	protein-coding
2723	chr10	32043567	32044566	+	0	NA	Intergenic	Intergenic	153788	NM_001270699	94134	Hs.499264	NM_018287	ENSG00000165322	ARHGAP12	-	Rho GTPase activating protein 12	protein-coding
4218	chr12	109232796	109233795	+	0	NA	intron (NM_001161330, intron 2 of 13)	intron (NM_001161330, intron 2 of 13)	-2513	NR_030350	693204		NR_030350	ENSG00000207622	MIR619	MIRN619|hsa-mir-619	microRNA 619	ncRNA	MIR619	-	-	MIR619	MIR619	TSS62	chr12:109176465-109251359	-	-	0	0	0	OK	0	0	0	OK	0	0	0	OK	0	0	0	OK	0	0	0	OK	0	0
272	chr7	150066762	150067761	+	0	NA	promoter-TSS (NM_014374)	promoter-TSS (NM_014374)	-997	NM_014374	29803	Hs.647086	NM_013400	ENSG00000214022	REPIN1	AP4|RIP60|ZNF464|Zfp464	replication initiator 1	protein-coding
4930	chr4	5760123	5761122	+	0	NA	TTS (NM_001306092)	TTS (NM_001306092)	47698	NM_001306090	2121	Hs.646899	NM_014556	ENSG00000072840	EVC	DWF-1|EVC1|EVCL	EvC ciliary complex subunit 1	protein-coding
775	chr2	65058081	65059080	+	0	NA	Intergenic	Intergenic	32185	NR_110224	101927438	Hs.580313	NR_110224	ENSG00000234572	LINC01800	-	long intergenic non-protein coding RNA 1800	ncRNA
2518	chr7	2726550	2728342	+	0	NA	promoter-TSS (NM_001284355)	promoter-TSS (NM_001284355)	-390	NM_001284355	155185	Hs.42221	NM_133463	ENSG00000174945	AMZ1	-	archaelysin family metallopeptidase 1	protein-coding
5668	chr6	43428173	43429172	+	0	NA	Intergenic	AluSp|SINE|Alu	-4302	NM_001286655	65989	Hs.337251	NM_023932	ENSG00000171462	DLK2	DLK-2|EGFL9	delta like non-canonical Notch ligand 2	protein-coding
20	chr10	49196765	49197764	+	0	NA	Intergenic	Intergenic	10561	NM_001137548	644054	Hs.99249	NM_001137548	ENSG00000276430	FAM25C	bA164N7.4	family with sequence similarity 25 member C	protein-coding	FAM25C	-	-	FAM25C	FAM25C	TSS21571,TSS23198,TSS720	chr10:47177203-47181688	-	-	0	0	0	OK	0	0	0	OK	0	0	0	OK	0	0	0	OK	0	0	0	OK	0	0
6010	chr11	111971354	111972353	+	0	NA	Intergenic	Intergenic	14305	NM_001276506	6392	Hs.356270	NM_003002	ENSG00000204370	SDHD	CBT1|CII-4|CWS3|PGL|PGL1|QPs3|SDH4|cybS	succinate dehydrogenase complex subunit D	protein-coding
2376	chr9	107829832	107830831	+	0	NA	Intergenic	MER63B|DNA|hAT-Blackjack	-139804	NM_005502	19	Hs.659274	NM_005502	ENSG00000165029	ABCA1	ABC-1|ABC1|CERP|HDLDT1|TGD	ATP binding cassette subfamily A member 1	protein-coding	ABCA1	-	-	ABCA1	ABCA1	TSS6540	chr9:107543283-107690527	-	-	0.087961	0.0392988	0.136623	OK	0.538006	0.378514	0.697498	OK	0.0814739	0.0335603	0.129388	OK	0.500108	0.348869	0.651347	OK	0.253761	0.159682	0.347841	OK	6.19847	5.07904
1983	chr20	49547812	49548811	+	0	NA	promoter-TSS (NM_001282531)	promoter-TSS (NM_001282531)	-561	NM_015339	23394	Hs.293736	NM_015339	ENSG00000101126	ADNP	ADNP1|HVDAS|MRD28	activity dependent neuroprotector homeobox	protein-coding	ADNP	-	-	ADNP	ADNP	TSS10630,TSS15871	chr20:49505454-49575060	-	-	3.16393	1.92978	4.39809	OK	2.89631	1.76735	4.02526	OK	3.33696	2.14092	4.53301	OK	3.94451	2.5743	5.31471	OK	2.54281	1.5474	3.53822	OK	3.4711	2.31664
6172	chr3	99928196	99929195	+	0	NA	Intergenic	Intergenic	24027	NR_028358	644444	Hs.652353	NR_028357	ENSG00000235156	TMEM30CP	CDC50C|TMEM30C	transmembrane protein 30C, pseudogene	pseudo
5263	chr2	69919890	69920889	+	0	NA	intron (NM_001320698, intron 2 of 14)	intron (NM_001320698, intron 2 of 14)	-48717	NM_001320702	307	Hs.422986	NM_001153	ENSG00000196975	ANXA4	ANX4|HEL-S-274|P32.5|PAP-II|PIG28|PP4-X|ZAP36	annexin A4	protein-coding
3100	chr1	200456750	200457749	+	0	NA	Intergenic	AluSp|SINE|Alu	-78063	NM_012482	23528	Hs.59757	NM_012482	ENSG00000162702	ZNF281	ZBP-99|ZNP-99	zinc finger protein 281	protein-coding	ZNF281	-	-	ZNF281	ZNF281	TSS450	chr1:200374074-200379186	-	-	15.8036	12.9808	18.6264	OK	15.4997	12.6877	18.3117	OK	19.374	15.9391	22.809	OK	13.4798	10.9961	15.9634	OK	17.2474	14.1757	20.3191	OK	15.7209	12.927
3787	chr2	36956390	36957389	+	0	NA	intron (NM_053276, intron 3 of 15)	intron (NM_053276, intron 3 of 15)	33056	NM_001177969	5212	Hs.137415	NM_053276	ENSG00000205221	VIT	-	vitrin	protein-coding
4304	chr8	101871260	101872259	+	0	NA	Intergenic	Intergenic	91040	NM_001135702	7534	Hs.492407	NM_003406	ENSG00000164924	YWHAZ	14-3-3-zeta|HEL-S-3|HEL-S-93|HEL4|KCIP-1|YWHAD	tyrosine 3-monooxygenase/tryptophan 5-monooxygenase activation protein zeta	protein-coding
3562	chr1	9599357	9600356	+	0	NA	intron (NM_032315, intron 1 of 6)	CpG	328	NM_032315	84275	Hs.568613	NM_032315	ENSG00000171612	SLC25A33	BMSC-MCP|PNC1	solute carrier family 25 member 33	protein-coding	SLC25A33	-	-	SLC25A33	SLC25A33	TSS10073	chr1:9599527-9642831	-	-	15.2992	11.7937	18.8047	OK	7.74191	5.65938	9.82444	OK	11.2543	8.48593	14.0226	OK	3.66804	2.45214	4.88395	OK	10.3206	7.73816	12.9031	OK	3.55919	2.36564
1627	chr7	55545309	55546308	+	0	NA	intron (NM_030796, intron 4 of 4)	intron (NM_030796, intron 4 of 4)	48765	NM_001321251	81552	Hs.488307	NM_030796	ENSG00000154978	VOPP1	ECOP|GASP	vesicular, overexpressed in cancer, prosurvival protein 1	protein-coding
4180	chr11	32913687	32914686	+	0	NA	promoter-TSS (NM_001076786)	promoter-TSS (NM_001076786)	-538	NM_001076786	79832	Hs.369368	NM_024774	ENSG00000060749	QSER1	-	glutamine and serine rich 1	protein-coding
4139	chr17	17598152	17599151	+	0	NA	intron (NM_030665, intron 1 of 5)	intron (NM_030665, intron 1 of 5)	13864	NM_030665	10743	Hs.655395	NM_030665	ENSG00000108557	RAI1	SMCR|SMS	retinoic acid induced 1	protein-coding	RAI1	-	-	RAI1	RAI1	TSS22802	chr17:17584786-17740325	-	-	3.45265	2.37129	4.53402	OK	3.61516	2.29517	4.93515	OK	2.46148	1.6848	3.23815	OK	2.1349	1.10834	3.16146	OK	2.85922	1.87729	3.84115	OK	4.71878	2.98316
468	chr1	41707683	41708682	+	0	NA	promoter-TSS (NM_001172220)	promoter-TSS (NM_001172220)	-367	NM_001172219	22955	Hs.571874	NM_012236	ENSG00000010803	SCMH1	Scml3	sex comb on midleg homolog 1 (Drosophila)	protein-coding
6145	chr19	40007564	40008563	+	0	NA	intron (NM_182704, intron 1 of 5)	L2a|LINE|L2	2310	NM_182704	348303	Hs.319284	NM_182704	ENSG00000186838	SELENOV	SELV	selenoprotein V	protein-coding
3030	chr12	22094561	22095560	+	0	NA	Intergenic	CpG	-5432	NM_020297	10060	Hs.732701	NM_005691	ENSG00000069431	ABCC9	ABC37|ATFB12|CANTU|CMD1O|SUR2	ATP binding cassette subfamily C member 9	protein-coding
1019	chr4	39402798	39403797	+	0	NA	Intergenic	AluSz|SINE|Alu	-5176	NM_175737	152831	Hs.90756	NM_175737	ENSG00000134962	KLB	BKL	klotho beta	protein-coding	KLB	-	-	KLB	KLB	TSS2430	chr4:39046450-39640481	-	-	0.0265334	0	0.409713	OK	0.0103172	0	0.220558	OK	0.0181936	0	0.343575	OK	0.0198699	0	0.288015	OK	0.00987823	0	0.246111	OK	0.0108882	0
700	chr2	239078810	239079809	+	0	NA	exon (NM_030768, exon 12 of 12)	exon (NM_030768, exon 12 of 12)	11660	NM_001291832	151176	Hs.24951	NM_152521	ENSG00000178752	ERFE	C1QTNF15|CTRP15|FAM132B	erythroferrone	protein-coding
78	chr12	56215667	56216666	+	0	NA	exon (NM_032364, exon 6 of 7)	exon (NM_032364, exon 6 of 7)	4360	NM_014182	29095	Hs.534450	NM_014182	ENSG00000123353	ORMDL2	HSPC160|MST095|MSTP095|adoplin-2	ORMDL sphingolipid biosynthesis regulator 2	protein-coding	ORMDL2	-	-	ORMDL2	ORMDL2	TSS7307	chr12:56211805-56236767	-	-	27.8299	19.2321	36.4276	OK	32.7544	22.3229	43.1858	OK	30.4688	20.9143	40.0234	OK	31.7141	22.3134	41.1147	OK	32.6488	21.8931	43.4045	OK	34.2018	22.4224
3369	chr10	126067591	126068590	+	0	NA	Intergenic	Intergenic	39455	NM_001322968	4942	Hs.523332	NM_000274	ENSG00000065154	OAT	GACR|HOGA|OATASE|OKT	ornithine aminotransferase	protein-coding
6612	chr2	224883683	224884682	+	0	NA	intron (NM_006216, intron 1 of 8)	intron (NM_006216, intron 1 of 8)	12013	NR_073116	5270	Hs.38449	NM_006216	ENSG00000135919	SERPINE2	GDN|GDNPF|PI-7|PI7|PN-1|PN1|PNI	serpin family E member 2	protein-coding
6274	chr5	8071850	8072849	+	0	NA	Intergenic	Intergenic	203132	NR_134481	4552	Hs.481551	NM_002454	ENSG00000124275	MTRR	MSR|cblE	5-methyltetrahydrofolate-homocysteine methyltransferase reductase	protein-coding
5571	chr9	36132025	36133024	+	0	NA	Intergenic	Intergenic	-4009	NR_104641	152007	Hs.493819	NM_022343	ENSG00000122694	GLIPR2	C9orf19|GAPR-1|GAPR1	GLI pathogenesis related 2	protein-coding
413	chr15	41544725	41545724	+	0	NA	intron (NM_007236, intron 2 of 6)	AluSc|SINE|Alu	21787	NM_007236	11261	Hs.406234	NM_007236	ENSG00000187446	CHP1	CHP|SLC9A1BP|Sid470p|p22|p24	calcineurin like EF-hand protein 1	protein-coding	CHP1	-	-	CHP1	CHP1	TSS26165	chr15:41523436-41574083	-	-	7.72876	6.09151	9.366	OK	11.9815	9.62131	14.3417	OK	8.8728	7.02728	10.7183	OK	10.5461	8.42524	12.667	OK	12.0439	9.67699	14.4109	OK	15.3632	12.4578
294	chr11	65778908	65779907	+	0	NA	promoter-TSS (NM_001323)	promoter-TSS (NM_001323)	-55	NM_001323	1474	Hs.139389	NM_001323	ENSG00000175315	CST6	-	cystatin E/M	protein-coding	CST6	-	-	CST6	CST6	TSS21553	chr11:65779461-65780976	-	-	0.0723149	0	0.333635	OK	0	0	0	OK	0	0	0	OK	0	0	0	OK	0.254347	0	0.725541	OK	0.130685	0
764	chr8	37401110	37402109	+	0	NA	Intergenic	Intergenic	-22705	NR_121621	100507420	Hs.105962	NR_121620		LINC01605	-	long intergenic non-protein coding RNA 1605	ncRNA
5342	chr12	69836593	69837592	+	0	NA	Intergenic	MLT1F2|LTR|ERVL-MaLR	-27037	NM_001278354	10818	Hs.593446	NM_006654	ENSG00000166225	FRS2	FRS1A|FRS2A|FRS2alpha|SNT|SNT-1|SNT1	fibroblast growth factor receptor substrate 2	protein-coding
4953	chr19	38464049	38465048	+	0	NA	intron (NM_015073, intron 1 of 21)	intron (NM_015073, intron 1 of 21)	66687	NM_015073	23094	Hs.655502	NM_015073	ENSG00000105738	SIPA1L3	CTRCT45|SPAL3|SPAR3	signal induced proliferation associated 1 like 3	protein-coding	SIPA1L3	-	-	SIPA1L3	SIPA1L3	TSS8931	chr19:38397860-38699012	-	-	2.0285	1.527	2.53	OK	1.07958	0.775766	1.3834	OK	2.58853	2.00475	3.17232	OK	1.64593	1.2307	2.06115	OK	2.10519	1.60009	2.61029	OK	1.43023	1.05261
6044	chr17	719484	720483	+	0	NA	intron (NM_022463, intron 5 of 7)	L2b|LINE|L2	-34412	NM_016080	51031	Hs.279061	NM_016080	ENSG00000167699	GLOD4	C17orf25|CGI-150|HC71	glyoxalase domain containing 4	protein-coding	GLOD4	-	-	GLOD4	GLOD4	TSS21685	chr17:662548-695741	-	-	55.2784	43.5895	66.9673	OK	55.5658	43.9593	67.1723	OK	54.4913	43.0399	65.9426	OK	61.5211	49.0084	74.0338	OK	44.6761	35.3328	54.0193	OK	39.8094	31.2231
2075	chr22	50765193	50766192	+	0	NA	promoter-TSS (NM_001001794)	promoter-TSS (NM_001001794)	-203	NM_001001794	414918	Hs.530380	NM_001001794	ENSG00000205593	DENND6B	AFI1B|FAM116B	DENN domain containing 6B	protein-coding	DENND6B	-	-	DENND6B	DENND6B	TSS28000	chr22:50750391-50765489	-	-	0.73274	0.331575	1.1339	OK	1.01253	0.545544	1.47951	OK	1.24012	0.729284	1.75096	OK	0.633188	0.280535	0.98584	OK	0.495714	0.185456	0.805971	OK	0.969342	0.511148
4582	chr5	39720816	39721815	+	0	NA	Intergenic	Intergenic	200782	NR_104632	101926940	Hs.436359	NR_104632	ENSG00000271334	LINC02104	-	long intergenic non-protein coding RNA 2104	ncRNA
1981	chr18	33038597	33039596	+	0	NA	Intergenic	Intergenic	38517	NM_001308064	125476	Hs.464903	NM_194281	ENSG00000153391	INO80C	C18orf37|IES6|hIes6	INO80 complex subunit C	protein-coding
3638	chr3	12764609	12765608	+	0	NA	Intergenic	AluJr|SINE|Alu	35700	NM_001284407	55287	Hs.475502	NM_018306	ENSG00000088726	TMEM40	-	transmembrane protein 40	protein-coding
2081	chr8	48188964	48189963	+	0	NA	intron (NR_104581, intron 1 of 16)	intron (NR_104581, intron 1 of 16)	15993	NM_001080394	23514	Hs.381058	NM_001080394	ENSG00000164808	SPIDR	KIAA0146	scaffolding protein involved in DNA repair	protein-coding	SPIDR	-	-	SPIDR	SPIDR	TSS841	chr8:48173469-48648563	-	-	21.7115	17.7788	25.6443	OK	21.6754	17.7628	25.588	OK	23.3578	19.1664	27.5493	OK	26.257	21.559	30.955	OK	17.237	14.0457	20.4282	OK	12.5226	10.0904
606	chr12	53614288	53615287	+	0	NA	promoter-TSS (NM_001243732)	promoter-TSS (NM_001243732)	-590	NM_001042728	5916	Hs.1497	NM_000966	ENSG00000172819	RARG	NR1B3|RARC	retinoic acid receptor gamma	protein-coding
4416	chr6	119484235	119485234	+	0	NA	Intergenic	AluSq2|SINE|Alu	-14376	NM_001100411	79632	Hs.443789	NM_024581	ENSG00000111879	FAM184A	C6orf60	family with sequence similarity 184 member A	protein-coding
3559	chr16	89459059	89460058	+	0	NA	intron (NR_045839, intron 2 of 9)	intron (NR_045839, intron 2 of 9)	-37768	NR_110931	101927817	Hs.667942	NR_110931		LOC101927817	-	uncharacterized LOC101927817	ncRNA	LOC101927817	-	-	LOC101927817	LOC101927817	TSS16191	chr16:89334028-89556969	-	-	0.0458967	0	0.23461	OK	0	0	0	OK	0.0120713	0	0.135596	OK	0	0	0	OK	0.024297	0	0.167391	OK	0.0374526	0
2522	chr18	10687210	10688209	+	0	NA	intron (NM_022068, intron 45 of 51)	MLT1H|LTR|ERVL-MaLR	25779	NR_110777	101927410	Hs.436902	NR_110777	ENSG00000260779	LOC101927410	-	uncharacterized LOC101927410	ncRNA	LOC101927410	-	-	LOC101927410	LOC101927410	TSS27878	chr18:10661929-10666884	-	-	0	0	0	OK	0	0	0	OK	0	0	0	OK	0	0	0	OK	0	0	0	OK	0.0127426	0
1855	chr3	44035971	44036970	+	0	NA	Intergenic	CpG	-119234	NR_029700	406929		NR_029700	ENSG00000207954	MIR138-1	MIRN138-1|mir-138-1	microRNA 138-1	ncRNA	MIR138-1	-	-	MIR138-1	MIR138-1	TSS2505	chr3:44155703-44155802	-	-	0	0	0	OK	0	0	0	OK	0	0	0	OK	0	0	0	OK	0	0	0	OK	0	0
432	chr14	21554451	21555450	+	0	NA	intron (NM_018071, intron 19 of 23)	intron (NM_018071, intron 19 of 23)	11858	NM_016423	51222	Hs.250493	NM_016423	ENSG00000165804	ZNF219	ZFP219	zinc finger protein 219	protein-coding	ZNF219	-	-	ZNF219	ZNF219	TSS14024,TSS304,TSS33612	chr14:21484921-21572863	-	-	1.02706	0	2.34025	OK	1.08508	0	2.32558	OK	0.443328	0	1.3198	OK	0.916516	0	2.10276	OK	1.29713	0	2.82084	OK	1.50453	0
4235	chr19	45581985	45582984	+	0	NA	promoter-TSS (NM_001319055)	promoter-TSS (NM_001319055)	31	NM_001319054	79760	Hs.466919	NM_024707	ENSG00000142252	GEMIN7	SIP3	gem nuclear organelle associated protein 7	protein-coding
5922	chr12	41732612	41733611	+	0	NA	intron (NM_001164595, intron 3 of 9)	L1MA3|LINE|L1	-98430	NM_013377	29951	Hs.380044	NM_013377	ENSG00000165966	PDZRN4	LNX4|SAMCAP3L	PDZ domain containing ring finger 4	protein-coding	PDZRN4	-	-	PDZRN4	PDZRN4	TSS25396,TSS28074	chr12:41582249-41968392	-	-	0	0	0	OK	0	0	0	OK	0	0	0	OK	0	0	0	OK	0	0	0	OK	0.0198581	0
5349	chrX	75956967	75957966	+	0	NA	intron (NR_110400, intron 1 of 3)	L1P4e|LINE|L1	182319	NR_029909	494333		NR_029909	ENSG00000283242	MIR384	MIRN384|hsa-mir-384	microRNA 384	ncRNA	MIR384	-	-	MIR384	MIR384	TSS327	chrX:75878198-76234957	-	-	0	0	0	OK	0	0	0	OK	0	0	0	OK	0	0	0	OK	0	0	0	OK	0	0
5713	chr11	72002986	72003985	+	0	NA	TTS (NM_001258392)	TTS (NM_001258392)	-48265	NM_005169	401	Hs.731115	NM_005169	ENSG00000165462	PHOX2A	ARIX|CFEOM2|FEOM2|NCAM2|PMX2A	paired like homeobox 2a	protein-coding	PHOX2A	-	-	PHOX2A	PHOX2A	TSS1769	chr11:71935881-71955220	-	-	0	0	0	OK	0	0	0	OK	0	0	0	OK	0	0	0	OK	0	0	0	OK	0	0
6220	chr7	121184437	121185436	+	0	NA	Intergenic	MER92C|LTR|ERV1	-148514	NM_001040020	10447	Hs.434053	NM_014888	ENSG00000196937	FAM3C	GS3786|ILEI	family with sequence similarity 3 member C	protein-coding
5217	chr17	2611913	2612912	+	0	NA	intron (NM_015229, intron 1 of 25)	intron (NM_015229, intron 1 of 25)	2515	NM_015229	23277	Hs.22616	NM_015229	ENSG00000132361	CLUH	CLU1|KIAA0664	clustered mitochondria homolog	protein-coding	CLUH	-	-	CLUH	CLUH	TSS3192	chr17:2592679-2614927	-	-	31.2672	25.8441	36.6904	OK	17.1689	14.0553	20.2824	OK	26.0967	21.5895	30.6039	OK	16.5474	13.5358	19.559	OK	24.7162	20.4036	29.0287	OK	16.5248	13.5029
2415	chr6	42750710	42751709	+	0	NA	promoter-TSS (NR_134654)	promoter-TSS (NR_134654)	-25	NR_134654	401261	Hs.656652	NM_001004322		LOC401261	-	uncharacterized LOC401261	ncRNA
708	chr12	50635452	50636451	+	0	NA	intron (NM_001113546, intron 2 of 10)	intron (NM_001113546, intron 2 of 10)	-7956	NR_031625	100302220		NR_031625	ENSG00000221604	MIR1293	MIRN1293|hsa-mir-1293|mir-1293	microRNA 1293	ncRNA	MIR1293	-	-	MIR1293	MIR1293	TSS1390	chr12:50569562-50677353	-	-	0	0	0	OK	0	0	0	OK	0	0	0	OK	0	0	0	OK	0	0	0	OK	0	0
2583	chr6	30495135	30496134	+	0	NA	Intergenic	AluY|SINE|Alu	-28852	NM_001077497	80742	Hs.118354	NM_025263	ENSG00000204576	PRR3	CAT56	proline rich 3	protein-coding
2589	chr11	1849960	1850959	+	0	NA	Intergenic	Intergenic	-5081	NM_001290334	90019	Hs.161031	NM_138567	ENSG00000149043	SYT8	-	synaptotagmin 8	protein-coding
3286	chr15	62910273	62911272	+	0	NA	Intergenic	Intergenic	26608	NR_026897	197003	Hs.352253	NM_152648	ENSG00000259458	MGC15885	-	uncharacterized protein MGC15885	ncRNA
4764	chr10	68404993	68405992	+	0	NA	intron (NM_001127384, intron 9 of 17)	MER1B|DNA|hAT-Charlie	-280300	NM_178011	347731	Hs.652155	NM_178011	ENSG00000198739	LRRTM3	-	leucine rich repeat transmembrane neuronal 3	protein-coding	LRRTM3	-	-	LRRTM3	LRRTM3	TSS16742,TSS29882	chr10:67672275-69455949	-	-	0	0	0	OK	0	0	0	OK	0.0357375	0	0.0984146	OK	0	0	0	OK	0	0	0	OK	0	0
2814	chr12	124086196	124087195	+	0	NA	promoter-TSS (NM_020936)	promoter-TSS (NM_020936)	71	NM_020936	57696	Hs.286173	NM_020936	ENSG00000111364	DDX55	-	DEAD-box helicase 55	protein-coding	DDX55	-	-	DDX55	DDX55	TSS19413	chr12:124086671-124105482	-	-	14.2934	11.4035	17.1832	OK	9.97935	7.81741	12.1413	OK	13.2622	10.5326	15.9917	OK	11.6285	9.20069	14.0563	OK	11.8948	9.41494	14.3746	OK	9.49928	7.43578
710	chr11	2950124	2951123	+	0	NA	promoter-TSS (NM_003311)	promoter-TSS (NM_003311)	27	NM_003311	7262	Hs.154036	NM_003311	ENSG00000181649	PHLDA2	BRW1C|BWR1C|HLDA2|IPL|TSSC3	pleckstrin homology like domain family A member 2	protein-coding	PHLDA2	-	-	PHLDA2	PHLDA2	TSS1160	chr11:2949502-2950650	-	-	196.27	160.197	232.342	OK	154.777	126.311	183.244	OK	250.941	207.511	294.372	OK	218.761	180.484	257.038	OK	464.69	386.77	542.611	OK	314.324	260.614
1656	chr1	201507584	201508583	+	0	NA	Intergenic	CpG	19051	NR_026667	376693	Hs.605989	NR_026667		RPS10P7	RPS10_2_147	ribosomal protein S10 pseudogene 7	pseudo	RPS10P7	-	-	RPS10P7	RPS10P7	TSS32203	chr1:201489031-201489720	-	-	0	0	0	OK	0.393946	0	0.899252	OK	0.278084	0	0.762732	OK	0.219302	0	0.613266	OK	0.279487	0	0.693458	OK	0.321807	0
856	chr7	1576500	1579181	+	0	NA	intron (NM_002360, intron 1 of 2)	intron (NM_002360, intron 1 of 2)	7472	NM_002360	7975	Hs.520612	NM_002360	ENSG00000198517	MAFK	NFE2U|P18	MAF bZIP transcription factor K	protein-coding	MAFK	-	-	MAFK	MAFK	TSS17094	chr7:1570367-1596066	-	-	2.01426	1.36929	2.65923	OK	1.33906	0.869533	1.80859	OK	0.885857	0.530448	1.24127	OK	0.916904	0.545756	1.28805	OK	3.82227	2.81054	4.834	OK	3.01093	2.16671
5105	chr5	81505894	81506893	+	0	NA	intron (NM_001131028, intron 6 of 8)	L1ME3A|LINE|L1	67842	NM_001025	6228	Hs.527193	NM_001025	ENSG00000186468	RPS23	S23	ribosomal protein S23	protein-coding	RPS23	-	-	RPS23	RPS23	TSS2807	chr5:81569138-81574235	-	-	55.7787	46.448	65.1095	OK	51.6473	42.9259	60.3686	OK	64.5608	53.7859	75.3357	OK	72.0797	60.1722	83.9872	OK	56.9742	47.4362	66.5122	OK	51.891	43.145
1664	chr11	8891943	8892942	+	0	NA	intron (NM_005418, intron 2 of 22)	CpG	40056	NM_005418	6764	Hs.117715	NM_005418	ENSG00000166444	ST5	DENND2B|HTS1|p126	suppression of tumorigenicity 5	protein-coding	ST5	-	-	ST5	ST5	TSS1611,TSS20640,TSS2427	chr11:8714898-8932498	-	-	15.4034	12.37	18.4368	OK	22.0895	18.0455	26.1336	OK	18.6702	15.1384	22.2019	OK	17.1649	13.9093	20.4205	OK	9.56173	7.51669	11.6068	OK	22.4167	18.2318
112	chr19	54769645	54770644	+	0	NA	Intergenic	Intergenic	-8973	NM_006840	10990	Hs.655338	NM_006840	ENSG00000105609	LILRB5	CD85C|LIR-8|LIR8	leukocyte immunoglobulin like receptor B5	protein-coding	LILRB5	-	-	LILRB5	LILRB5	TSS4395	chr19:54754268-54761171	-	-	0	0	0	OK	0	0	0	OK	0	0	0	OK	0	0	0	OK	0	0	0	OK	0	0
5935	chr22	43058028	43059027	+	0	NA	Intergenic	CpG	-13122	NM_000398	1727	Hs.561064	NM_000398	ENSG00000100243	CYB5R3	B5R|DIA1	cytochrome b5 reductase 3	protein-coding	CYB5R3	-	-	CYB5R3	CYB5R3	TSS15813,TSS18358,TSS3937	chr22:43013845-43045405	-	-	135.642	113.583	157.702	OK	181.841	152.612	211.07	OK	163.387	137.097	189.677	OK	185.475	155.579	215.371	OK	237.193	199.101	275.285	OK	336.779	283.29
3211	chr7	74489002	74490001	+	0	NA	exon (NM_001281441, exon 1 of 9)	exon (NM_001281441, exon 1 of 9)	216	NM_001281441	81554	Hs.529623	NM_030798	ENSG00000274523	RCC1L	WBSCR16	RCC1 like	protein-coding
191	chr14	65447697	65448696	+	0	NA	intron (NM_001202559, intron 3 of 13)	FLAM_C|SINE|Alu	-5311	NM_002028	2342	Hs.325531	NM_002028	ENSG00000257365	FNTB	FPTB	farnesyltransferase, CAAX box, beta	protein-coding	FNTB	-	-	FNTB	FNTB	TSS3962	chr14:65381078-65569413	-	-	16.018	10.2761	21.76	OK	17.2771	10.2838	24.2704	OK	17.1909	10.0511	24.3307	OK	16.4115	9.74954	23.0735	OK	16.2244	8.89751	23.5513	OK	15.1918	9.19741
4613	chr10	121427016	121428015	+	0	NA	intron (NM_004281, intron 1 of 3)	intron (NM_004281, intron 1 of 3)	16633	NM_004281	9531	Hs.523309	NM_004281	ENSG00000151929	BAG3	BAG-3|BIS|CAIR-1|MFM6	BCL2 associated athanogene 3	protein-coding	BAG3	-	-	BAG3	BAG3	TSS31944	chr10:121410881-121437329	-	-	69.7458	57.9112	81.5803	OK	57.3175	47.4928	67.1422	OK	81.7021	68.0681	95.3362	OK	67.4276	56.0158	78.8395	OK	87.1198	72.6035	101.636	OK	99.2324	82.8026
3612	chr19	5314988	5315987	+	0	NA	intron (NM_130853, intron 1 of 28)	AluJr|SINE|Alu	25327	NM_002850	5802	Hs.744928	NM_002850	ENSG00000105426	PTPRS	PTPSIGMA|R-PTP-S|R-PTP-sigma	protein tyrosine phosphatase, receptor type S	protein-coding	PTPRS	-	-	PTPRS	PTPRS	TSS30158	chr19:5205518-5340814	-	-	1.21643	0.858055	1.5748	OK	1.54743	1.1388	1.95607	OK	1.63856	1.21856	2.05855	OK	1.98193	1.48754	2.47631	OK	1.48261	1.08133	1.8839	OK	2.61559	2.00403
588	chr11	536439	537438	+	0	NA	promoter-TSS (NM_198075)	promoter-TSS (NM_198075)	-584	NM_198075	115399	Hs.567655	NM_198075	ENSG00000161328	LRRC56	-	leucine rich repeat containing 56	protein-coding	LRRC56	-	-	LRRC56	LRRC56	TSS28075	chr11:537521-560779	-	-	0.0862719	0	0.203635	OK	0.102234	0	0.261738	OK	0.0644354	0	0.182072	OK	0.0668383	0	0.173903	OK	0.121072	0	0.312934	OK	0.269586	0.0126497
1684	chr16	87979026	87980025	+	0	NA	Intergenic	MLT1K|LTR|ERVL-MaLR	-5513	NM_001173540	54971	Hs.461705	NM_017869	ENSG00000172530	BANP	BEND1|SMAR1|SMARBP1	BTG3 associated nuclear protein	protein-coding
5097	chr12	54348759	54349758	+	0	NA	exon (NM_173860, exon 1 of 2)	exon (NM_173860, exon 1 of 2)	606	NM_173860	3228	Hs.381267	NM_173860	ENSG00000123407	HOXC12	HOC3F|HOX3|HOX3F	homeobox C12	protein-coding	HOXC12	-	-	HOXC12	HOXC12	TSS31042	chr12:54348713-54350350	-	-	0	0	0	OK	0	0	0	OK	0	0	0	OK	0	0	0	OK	0	0	0	OK	0	0
756	chr11	110343309	110344308	+	0	NA	Intergenic	AluJb|SINE|Alu	43147	NM_004109	2230	Hs.744	NM_004109	ENSG00000137714	FDX1	ADX|FDX|LOH11CR1D	ferredoxin 1	protein-coding	FDX1	-	-	FDX1	FDX1	TSS1902	chr11:110300660-110335608	-	-	9.15291	7.25825	11.0476	OK	7.93042	6.21954	9.6413	OK	7.06106	5.47639	8.64574	OK	5.37718	4.12645	6.62792	OK	7.99406	6.27854	9.70958	OK	4.82089	3.6791
262	chr3	125985856	125986855	+	0	NA	Intergenic	CpG	-86326	NM_001270364	10840	Hs.434435	NM_012190	ENSG00000144908	ALDH1L1	10-FTHFDH|10-fTHF|FDH|FTHFD	aldehyde dehydrogenase 1 family member L1	protein-coding
1944	chr17	76433363	76434362	+	0	NA	exon (NM_173628, exon 74 of 81)	exon (NM_173628, exon 74 of 81)	-47130	NR_102401	100996295	Hs.615304	NR_102401		DNAH17-AS1	-	DNAH17 antisense RNA 1	ncRNA	DNAH17-AS1	-	-	DNAH17-AS1	DNAH17-AS1	TSS33552	chr17:76374698-76573476	-	-	0.00848688	0	0.0540825	OK	0.0369208	0	0.14272	OK	0.00814809	0	0.0576842	OK	0.0282126	0	0.130497	OK	0	0	0	OK	0.0188423	0
5165	chr16	89610892	89611891	+	0	NA	intron (NM_003119, intron 10 of 16)	intron (NM_003119, intron 10 of 16)	-15674	NM_001243131	6137	Hs.410817	NM_000977	ENSG00000167526	RPL13	BBC1|D16S444E|D16S44E|L13	ribosomal protein L13	protein-coding
4422	chr19	5987042	5988041	+	0	NA	intron (NR_046376, intron 1 of 3)	intron (NR_046376, intron 1 of 3)	9127	NR_046376	100128568	Hs.624525	NR_046376	ENSG00000266983	LOC100128568	-	uncharacterized LOC100128568	ncRNA	LOC100128568	-	-	LOC100128568	LOC100128568	TSS1464	chr19:5978413-6110664	-	-	0.0535786	0	0.287127	OK	0	0	0	OK	0.257317	0	0.928	OK	0.0968543	0	0.47056	OK	0.104228	0	0.444993	OK	0.125355	0
6257	chr15	72842682	72843681	+	0	NA	intron (NM_005744, intron 3 of 13)	AluSx|SINE|Alu	-36377	NR_030359	693215		NR_030359	ENSG00000166233	MIR630	MIRN630|hsa-mir-630	microRNA 630	ncRNA	MIR630	-	-	MIR630	MIR630	TSS30624	chr15:72879557-72879654	-	-	0	0	0	OK	0	0	0	OK	0	0	0	OK	0	0	0	OK	0	0	0	OK	0	0
2590	chr11	59340257	59341256	+	0	NA	Intergenic	Intergenic	21875	NR_036120	100422880		NR_036120	ENSG00000264559	MIR3162	mir-3162	microRNA 3162	ncRNA	MIR3162	-	-	MIR3162	MIR3162	TSS10562	chr11:59341870-59383617	-	-	0	0	0	OK	0	0	0	OK	0	0	0	OK	0	0	0	OK	0	0	0	OK	0	0
542	chr3	38387756	38388755	+	0	NA	promoter-TSS (NM_005108)	promoter-TSS (NM_005108)	4	NM_005108	9942	Hs.659985	NM_005108	ENSG00000093217	XYLB	-	xylulokinase	protein-coding	XYLB	-	-	XYLB	XYLB	TSS4453	chr3:38388250-38456467	-	-	4.13928	3.15897	5.1196	OK	3.07953	2.29819	3.86086	OK	4.76801	3.6744	5.86162	OK	2.68624	1.98127	3.3912	OK	2.44467	1.78634	3.10299	OK	0.941209	0.607194
6109	chr6	42800945	42801944	+	0	NA	intron (NM_015349, intron 5 of 11)	AluSx1|SINE|Alu	12650	NM_015349	23506	Hs.658033	NM_015349	ENSG00000112624	GLTSCR1L	KIAA0240	GLTSCR1 like	protein-coding	GLTSCR1L	-	-	GLTSCR1L	GLTSCR1L	TSS20297	chr6:42788793-42836296	-	-	1.13624	0.824978	1.4475	OK	1.32521	0.974378	1.67604	OK	1.14687	0.829077	1.46465	OK	0.911136	0.644142	1.17813	OK	1.05443	0.757485	1.35138	OK	1.0068	0.722646
3750	chr6	43736678	43737677	+	0	NA	promoter-TSS (NM_001171625)	promoter-TSS (NM_001171625)	-769	NM_001171630	7422	Hs.73793	NM_003376	ENSG00000112715	VEGFA	MVCD1|VEGF|VPF	vascular endothelial growth factor A	protein-coding
3114	chr18	20959638	20960637	+	0	NA	intron (NR_134877, intron 5 of 13)	intron (NR_134877, intron 5 of 13)	57796	NM_032933	85019	Hs.137562	NM_032933	ENSG00000134490	TMEM241	C18orf45|hVVT	transmembrane protein 241	protein-coding	TMEM241	-	-	TMEM241	TMEM241	TSS544	chr18:20875978-21017925	-	-	7.52096	5.88821	9.1537	OK	5.51682	4.23669	6.79695	OK	12.8268	10.2829	15.3707	OK	8.76911	6.92	10.6182	OK	8.20279	6.44335	9.96222	OK	6.69776	5.2052
5337	chr1	38455357	38456356	+	0	NA	promoter-TSS (NM_006802)	promoter-TSS (NM_006802)	-74	NM_006802	10946	Hs.77897	NM_006802	ENSG00000183431	SF3A3	PRP9|PRPF9|SAP61|SF3a60	splicing factor 3a subunit 3	protein-coding	SF3A3	-	-	SF3A3	SF3A3	TSS26990	chr1:38422651-38455761	-	-	53.2783	44.251	62.3055	OK	36.5134	30.1408	42.886	OK	46.3023	38.3735	54.2311	OK	36.9441	30.5093	43.3789	OK	45.5585	37.7583	53.3587	OK	32.864	27.0782
4649	chr17	26673874	26674873	+	0	NA	TTS (NM_021137)	TTS (NM_021137)	-10231	NM_152464	147007	Hs.594696	NM_152464	ENSG00000244045	TMEM199	C17orf32|CDG2P|VMA12|VPH2	transmembrane protein 199	protein-coding	TMEM199	-	-	TMEM199	TMEM199	TSS23488	chr17:26662547-26690705	-	-	14.5292	7.79044	21.268	OK	10.6157	4.92718	16.3043	OK	12.3729	6.41071	18.3351	OK	10.3336	4.83396	15.8332	OK	12.2796	5.19677	19.3624	OK	11.8284	4.89796
2099	chr10	94455423	94456422	+	0	NA	TTS (NM_002729)	TTS (NM_002729)	6241	NM_002729	3087	Hs.118651	NM_002729	ENSG00000152804	HHEX	HEX|HMPH|HOX11L-PEN|PRH|PRHX	hematopoietically expressed homeobox	protein-coding	HHEX	-	-	HHEX	HHEX	TSS2981	chr10:94449680-94455408	-	-	5.30561	3.80196	6.80927	OK	2.36931	1.48286	3.25576	OK	7.82886	5.78626	9.87146	OK	4.92965	3.49684	6.36245	OK	11.5657	8.86025	14.2711	OK	2.75845	1.8007
2476	chr5	133774599	133775598	+	0	NA	Intergenic	Intergenic	-4360	NR_105044	102546229		NR_105044		LOC102546229	-	uncharacterized LOC102546229	ncRNA	LOC102546229	-	-	LOC102546229	LOC102546229	TSS28214	chr5:133764741-133770738	-	-	0	0	0	OK	0	0	0	OK	0	0	0	OK	0	0	0	OK	0	0	0	OK	0	0
2988	chr12	86138820	86139819	+	0	NA	Intergenic	Intergenic	90999	NM_005447	9182	Hs.527881	NM_005447	ENSG00000198774	RASSF9	P-CIP1|PAMCI|PCIP1	Ras association domain family member 9	protein-coding	RASSF9	-	-	RASSF9	RASSF9	TSS27965	chr12:86198330-86230318	-	-	0.721981	0.337674	1.10629	OK	1.03343	0.547427	1.51944	OK	0.758813	0.349832	1.1678	OK	1.11886	0.619516	1.61821	OK	0.336835	0.0858061	0.587865	OK	0.754984	0.358743
170	chr2	11484659	11485658	+	0	NA	promoter-TSS (NM_004850)	promoter-TSS (NM_004850)	375	NM_001321643	9475	Hs.681743	NM_004850	ENSG00000134318	ROCK2	ROCK-II	Rho associated coiled-coil containing protein kinase 2	protein-coding
4873	chr3	53879622	53880621	+	0	NA	promoter-TSS (NM_018725)	promoter-TSS (NM_018725)	299	NM_018397	55349	Hs.126688	NM_018397	ENSG00000016391	CHDH	-	choline dehydrogenase	protein-coding	CHDH	-	-	CHDH	CHDH	TSS25708	chr3:53850323-53880420	-	-	0.332346	0.14545	0.519242	OK	0.215014	0.0720008	0.358028	OK	0.0664488	0	0.146553	OK	0.00597872	0	0.0420527	OK	0.164675	0.0420721	0.287278	OK	0.0281684	0
1921	chr10	72217641	72218640	+	0	NA	Intergenic	CpG	-10436	NM_001329906	4838	Hs.370414	NM_018055	ENSG00000156574	NODAL	HTX5	nodal growth differentiation factor	protein-coding
6181	chr5	38258398	38259397	+	0	NA	exon (NM_001205301, exon 1 of 23)	exon (NM_001205301, exon 1 of 23)	386	NM_152403	133584	Hs.20103	NM_152403	ENSG00000164318	EGFLAM	AGRINL|AGRNL|PIKA	EGF like, fibronectin type III and laminin G domains	protein-coding	EGFLAM	-	-	EGFLAM	EGFLAM	TSS15532,TSS27627,TSS9322	chr5:38258510-38465582	-	-	11.1249	8.78047	13.4693	OK	9.69199	7.59267	11.7913	OK	14.9035	11.9192	17.8879	OK	7.55288	5.83556	9.2702	OK	6.91053	5.3084	8.51266	OK	6.55499	5.01688
3217	chr5	134104618	134105617	+	0	NA	intron (NM_014829, intron 3 of 22)	AluSx|SINE|Alu	10693	NM_014829	9879	Hs.406549	NM_014829	ENSG00000145833	DDX46	PRPF5|Prp5	DEAD-box helicase 46	protein-coding	DDX46	-	-	DDX46	DDX46	TSS16799	chr5:134094423-134166826	-	-	7.4633	6.0023	8.92429	OK	6.53172	5.1945	7.86893	OK	7.95558	6.40403	9.50713	OK	8.72079	7.02026	10.4213	OK	7.60568	6.12987	9.0815	OK	6.65659	5.33817
5745	chr5	172289784	172290783	+	0	NA	intron (NM_001031711, intron 1 of 9)	MER113|DNA|hAT-Charlie	29060	NM_001031711	57222	Hs.509163	NM_020462	ENSG00000113719	ERGIC1	ERGIC-32|ERGIC32|NET24	endoplasmic reticulum-golgi intermediate compartment 1	protein-coding
26	chr6	39852092	39853091	+	0	NA	intron (NM_001201427, intron 15 of 24)	intron (NM_001201427, intron 15 of 24)	12565	NR_125831	100505635	Hs.668513	NR_125831	ENSG00000235033	LOC100505635	-	uncharacterized LOC100505635	ncRNA	LOC100505635	-	-	LOC100505635	LOC100505635	TSS10873	chr6:39760158-39902290	-	-	0.108771	0	1.15891	OK	0.0557812	0	0.90637	OK	0	0	0	OK	0.0490383	0	0.549311	OK	0.101185	0	1.21898	OK	0.171254	0
6513	chr16	770855	771854	+	0	NA	exon (NM_001271285, exon 1 of 4)	exon (NM_001271285, exon 1 of 4)	212	NM_001271285	65990	Hs.166244	NM_023933	ENSG00000103254	FAM173A	C16orf24	family with sequence similarity 173 member A	protein-coding
4923	chr9	16266308	16267307	+	0	NA	intron (NR_073471, intron 1 of 3)	intron (NR_073471, intron 1 of 3)	9504	NR_073471	100129385	Hs.586441	NM_001271829	ENSG00000205549	C9orf92	Em:AL513424.1	chromosome 9 open reading frame 92	protein-coding
2116	chr2	96179446	96180445	+	0	NA	Intergenic	AluSc8|SINE|Alu	-29466	NM_001164464	653192	Hs.723811	NM_001164464		TRIM43B	-	tripartite motif containing 43B	protein-coding	TRIM43B	-	-	TRIM43B	TRIM43B	TSS21010	chr2:96142714-96150479	-	-	0	0	0	OK	0	0	0	OK	0	0	0	OK	0	0	0	OK	0	0	0	OK	0	0
2250	chr7	101760758	101761757	+	0	NA	intron (NM_181500, intron 8 of 22)	intron (NM_181500, intron 8 of 22)	-167096	NM_020979	10603	Hs.489448	NM_020979	ENSG00000160999	SH2B2	APS	SH2B adaptor protein 2	protein-coding	SH2B2	-	-	SH2B2	SH2B2	TSS1405	chr7:101928352-101962178	-	-	0.952013	0.410129	1.4939	OK	1.06346	0.508264	1.61866	OK	0.183548	0	0.38301	OK	0.234297	0	0.471313	OK	0.139267	0	0.318109	OK	0.295385	0.0251558
526	chr3	52188356	52189355	+	0	NA	promoter-TSS (NM_001161580)	promoter-TSS (NM_001161580)	-149	NM_001161580	25886	Hs.476306	NM_015426	ENSG00000164087	POC1A	PIX2|SOFT|WDR51A	POC1 centriolar protein A	protein-coding
1901	chr3	10142195	10143194	+	0	NA	intron (NM_001018115, intron 43 of 43)	AluSx|SINE|Alu	7221	NM_001164839	115795	Hs.190413	NM_173472	ENSG00000163705	FANCD2OS	C3orf24	FANCD2 opposite strand	protein-coding
3500	chr9	129253265	129254264	+	0	NA	intron (NM_033446, intron 9 of 9)	intron (NM_033446, intron 9 of 9)	-80981	NR_045006	641373	Hs.742606	NR_045006		NRON	NCRNA00194	non-protein coding RNA, repressor of NFAT	ncRNA	NRON	-	-	NRON	NRON	TSS17859	chr9:129089122-129269320	-	-	0	0	0	OK	0	0	0	OK	0	0	0	OK	0	0	0	OK	0	0	0	OK	0	0
6218	chr6	56839188	56840187	+	0	NA	intron (NM_152731, intron 1 of 6)	AluSq|SINE|Alu	19914	NM_152731	221336	Hs.582993	NM_152731	ENSG00000151917	BEND6	C6orf65	BEN domain containing 6	protein-coding	BEND6	-	-	BEND6	BEND6	TSS12850	chr6:56819772-56892142	-	-	4.34189	3.24856	5.43523	OK	3.97599	2.93805	5.01393	OK	7.1298	5.48504	8.77456	OK	5.34663	4.05347	6.63979	OK	1.5787	1.04964	2.10775	OK	3.13567	2.26899
359	chr19	34662928	34663927	+	0	NA	promoter-TSS (NM_015578)	promoter-TSS (NM_015578)	75	NM_001114093	26065	Hs.744009	NM_015578	ENSG00000257103	LSM14A	C19orf13|FAM61A|RAP55|RAP55A	LSM14A, mRNA processing body assembly factor	protein-coding
1229	chr7	73588308	73589307	+	0	NA	intron (NM_022170, intron 1 of 6)	CpG	101	NM_022170	7458	Hs.520943	NM_022170	ENSG00000106682	EIF4H	WBSCR1|WSCR1|eIF-4H	eukaryotic translation initiation factor 4H	protein-coding	EIF4H	-	-	EIF4H	EIF4H	TSS6860	chr7:73588705-73611429	-	-	96.1754	80.127	112.224	OK	83.3444	69.326	97.3628	OK	96.7735	80.7341	112.813	OK	87.6603	73.0076	102.313	OK	102.974	85.9738	119.974	OK	76.584	63.7001
6568	chr17	42296232	42297231	+	0	NA	intron (NR_045058, intron 1 of 20)	CpG	310	NM_001076684	7343	Hs.89781	NM_014233	ENSG00000108312	UBTF	NOR-90|UBF|UBF-1|UBF1|UBF2	upstream binding transcription factor, RNA polymerase I	protein-coding
2614	chr7	149171418	149172417	+	0	NA	exon (NM_152557, exon 7 of 7)	exon (NM_152557, exon 7 of 7)	-13864	NM_015694	27153	Hs.38512	NM_015694	ENSG00000196453	ZNF777	-	zinc finger protein 777	protein-coding	ZNF777	-	-	ZNF777	ZNF777	TSS15626	chr7:149128453-149158053	-	-	2.26078	1.5339	2.98766	OK	2.30626	1.59089	3.02163	OK	1.64376	1.08861	2.19891	OK	1.47582	0.955884	1.99575	OK	2.07115	1.40261	2.73969	OK	3.35947	2.42365
2608	chr4	45281626	45282625	+	0	NA	Intergenic	Intergenic	-553474	NM_138335	132789	Hs.21398	NM_138335	ENSG00000163281	GNPDA2	GNP2|SB52	glucosamine-6-phosphate deaminase 2	protein-coding	GNPDA2	-	-	GNPDA2	GNPDA2	TSS12607	chr4:44703811-44728651	-	-	14.7075	11.7288	17.6861	OK	15.9622	12.7311	19.1933	OK	19.0414	15.2597	22.8231	OK	19.1155	15.3811	22.8499	OK	13.9054	11.0273	16.7836	OK	16.2891	13.0564
1001	chr6	33167774	33168773	+	0	NA	promoter-TSS (NM_006979).4	promoter-TSS (NM_006979).4	200	NM_021976	6257	Hs.388034	NM_021976	ENSG00000204231	RXRB	DAUDI6|H-2RIIBP|NR2B2|RCoR-1	retinoid X receptor beta	protein-coding	RXRB	-	-	RXRB	RXRB	TSS11336,TSS15115,TSS20513,TSS23709,TSS23794,TSS24767,TSS2622,TSS33278,TSS625,TSS6291,TSS7048,TSS7742	chr6:33161361-33172214	-	-	10.2233	3.10972	17.3369	OK	12.6691	6.15769	19.1805	OK	15.0629	6.84269	23.2831	OK	12.9986	6.13689	19.8604	OK	12.443	5.41158	19.4745	OK	12.9634	4.38697
3694	chr14	59734436	59735435	+	0	NA	intron (NM_014992, intron 1 of 24)	L1MB8|LINE|L1	4776	NM_014992	23002	Hs.19156	NM_014992	ENSG00000100592	DAAM1	-	dishevelled associated activator of morphogenesis 1	protein-coding	DAAM1	-	-	DAAM1	DAAM1	TSS23160,TSS33558	chr14:59655380-59838123	-	-	3.89921	3.06515	4.73327	OK	5.1378	4.0823	6.19329	OK	4.36252	3.42979	5.29525	OK	5.61814	4.48403	6.75225	OK	4.07646	3.21322	4.9397	OK	6.2175	4.98677
232	chr6	19804707	19805706	+	0	NA	promoter-TSS (NR_134651)	promoter-TSS (NR_134651)	-216	NR_134651	100506885	Hs.346489	NR_134649	ENSG00000228412	LOC100506885	-	uncharacterized LOC100506885	ncRNA
6207	chrX	12993180	12994179	+	0	NA	intron (NM_021109, intron 1 of 2)	CpG	453	NM_021109	7114	Hs.437277	NM_021109	ENSG00000205542	TMSB4X	FX|PTMB4|TB4X|TMSB4	thymosin beta 4, X-linked	protein-coding	TMSB4X	-	-	TMSB4X	TMSB4X	TSS28707	chrX:12993225-12995346	-	-	1165.89	978.216	1353.57	OK	2364.35	1989.18	2739.53	OK	1019.19	854.984	1183.39	OK	1363.84	1145.78	1581.89	OK	1755.88	1476.74	2035.01	OK	1800.07	1513.83
3458	chr11	72868255	72869254	+	0	NA	Intergenic	Intergenic	-15611	NM_014824	9873	Hs.744959	NM_014824	ENSG00000137478	FCHSD2	NWK|SH3MD3	FCH and double SH3 domains 2	protein-coding	FCHSD2	-	-	FCHSD2	FCHSD2	TSS18354	chr11:72547789-72853143	-	-	11.9495	9.70385	14.1952	OK	11.3578	9.20912	13.5065	OK	17.1024	14.0162	20.1885	OK	11.4074	9.24777	13.567	OK	14.3283	11.6951	16.9616	OK	12.6826	10.32
3054	chr3	119813939	119814938	+	0	NA	Intergenic	CpG	-1174	NM_002093	2932	Hs.445733	NM_002093	ENSG00000082701	GSK3B	-	glycogen synthase kinase 3 beta	protein-coding	GSK3B	-	-	GSK3B	GSK3B	TSS9891	chr3:119540801-119813264	-	-	10.5695	8.68412	12.4549	OK	11.1347	9.13982	13.1296	OK	9.21769	7.51175	10.9236	OK	8.33104	6.76522	9.89686	OK	12.4562	10.2632	14.6493	OK	8.03024	6.54527
6008	chr12	120696208	120697207	+	0	NA	intron (NM_001080855, intron 1 of 11)	AluSp|SINE|Alu	6867	NM_002859	5829	Hs.446336	NM_002859	ENSG00000089159	PXN	-	paxillin	protein-coding	PXN	-	-	PXN	PXN	TSS25192,TSS32961	chr12:120639093-120703574	-	-	45.401	37.5952	53.2069	OK	42.7679	35.4187	50.1171	OK	52.3861	43.4772	61.2951	OK	45.3038	37.6627	52.9448	OK	41.1568	34.0937	48.2199	OK	30.5681	25.1698
1182	chr4	169695186	169696185	+	0	NA	intron (NM_016081, intron 10 of 20)	AluSz|SINE|Alu	-57471	NM_001166110	23022	Hs.151220	NM_016081	ENSG00000129116	PALLD	CGI-151|CGI151|MYN|PNCA1|SIH002	palladin, cytoskeletal associated protein	protein-coding
225	chr9	131907964	131908963	+	0	NA	intron (NM_001271832, intron 8 of 8)	intron (NM_001271832, intron 8 of 8)	32077	NM_203434	389792	Hs.529857	NM_203434	ENSG00000188483	IER5L	bA247A12.2	immediate early response 5 like	protein-coding	IER5L	-	-	IER5L	IER5L	TSS4492	chr9:131937830-131940540	-	-	0.822725	0.365741	1.27971	OK	1.30028	0.723497	1.87706	OK	2.19855	1.4114	2.98571	OK	2.66631	1.77186	3.56077	OK	0.670426	0.287703	1.05315	OK	2.38582	1.54299
6744	chr7	100424368	100425367	+	0	NA	5' UTR (NM_004444, exon 1 of 17)	5' UTR (NM_004444, exon 1 of 17)	276	NM_004444	2050	Hs.437008	NM_004444	ENSG00000196411	EPHB4	HTK|MYK1|TYRO11	EPH receptor B4	protein-coding	EPHB4	-	-	EPHB4	EPHB4	TSS27283	chr7:100400186-100425143	-	-	9.59992	7.62076	11.5791	OK	12.4235	10.0001	14.8469	OK	5.52063	4.29955	6.74171	OK	5.58348	4.33121	6.83575	OK	5.43442	4.19345	6.67539	OK	5.78848	4.49548
1447	chr14	45716333	45717332	+	0	NA	intron (NM_018353, intron 1 of 16)	AluJb|SINE|Alu	5773	NM_018353	55320	Hs.732769	NM_018353	ENSG00000129534	MIS18BP1	C14orf106|HSA242977|KNL2|M18BP1	MIS18 binding protein 1	protein-coding	MIS18BP1	-	-	MIS18BP1	MIS18BP1	TSS17821	chr14:45672392-45722605	-	-	7.7763	6.23983	9.31277	OK	11.3227	9.18246	13.4629	OK	9.79693	7.88112	11.7127	OK	19.7544	16.2645	23.2443	OK	7.35567	5.87947	8.83187	OK	5.31495	4.1862
142	chr13	21748642	21749641	+	0	NA	intron (NM_145061, intron 1 of 8)	AluSx1|SINE|Alu	-1231	NM_024026	78988	Hs.458367	NM_024026	ENSG00000173141	MRPL57	MRP63|bMRP63	mitochondrial ribosomal protein L57	protein-coding	MRPL57	-	-	MRPL57	MRPL57	TSS21241	chr13:21727733-21753220	-	-	19.2743	12.8179	25.7306	OK	20.5974	14.7356	26.4593	OK	15.8329	11.5933	20.0725	OK	19.2081	13.7308	24.6854	OK	19.1749	13.4828	24.8671	OK	16.0289	12.2128
207	chr17	67798424	67799423	+	0	NA	intron (NR_109972, intron 3 of 4)	MER52D|LTR|ERV1	-158925	NR_110874	102723487	Hs.451409	NR_110874	ENSG00000237560	LINC01497	-	long intergenic non-protein coding RNA 1497	ncRNA	LINC01497	-	-	LINC01497	LINC01497	TSS5775	chr17:67957847-67979685	-	-	0.0973884	0	0.4001	OK	0	0	0	OK	0	0	0	OK	0	0	0	OK	0.0914135	0	0.392816	OK	0.203774	0
1510	chr1	935196	936195	+	0	NA	promoter-TSS (NM_021170)	promoter-TSS (NM_021170)	-143	NM_021170	57801	Hs.154029	NM_021170	ENSG00000188290	HES4	bHLHb42	hes family bHLH transcription factor 4	protein-coding	HES4	-	-	HES4	HES4	TSS8398	chr1:934341-935552	-	-	15.7728	10.9097	20.6358	OK	19.4307	14.1318	24.7297	OK	5.78908	3.4653	8.11287	OK	5.83306	3.48206	8.18405	OK	31.6607	23.5646	39.7568	OK	21.6682	15.74
5392	chr12	112975632	112976631	+	0	NA	Intergenic	Charlie8|DNA|hAT-Charlie	-36770	NM_001347952	22895	Hs.21239	NM_014954	ENSG00000089169	RPH3A	-	rabphilin 3A	protein-coding
48	chr18	39693986	39694985	+	0	NA	Intergenic	Intergenic	-72148	NR_046456	284260	Hs.652819	NR_046174	ENSG00000267586	LINC00907	-	long intergenic non-protein coding RNA 907	ncRNA
4491	chr20	44235694	44236693	+	0	NA	TTS (NM_147198)	TTS (NM_147198)	-22192	NM_080753	140832	Hs.199380	NM_080753	ENSG00000180305	WFDC10A	C20orf146|WAP10|dJ688G8.3	WAP four-disulfide core domain 10A	protein-coding	WFDC10A	-	-	WFDC10A	WFDC10A	TSS2791	chr20:44236577-44259907	-	-	0	0	0	OK	0	0	0	OK	0	0	0	OK	0.0646087	0	0.370263	OK	0	0	0	OK	0	0
3641	chr17	62637501	62638500	+	0	NA	intron (NM_022739, intron 1 of 18)	AluSq2|SINE|Alu	20386	NM_022739	64750	Hs.515011	NM_022739	ENSG00000108854	SMURF2	-	SMAD specific E3 ubiquitin protein ligase 2	protein-coding	SMURF2	-	-	SMURF2	SMURF2	TSS10905	chr17:62540734-62658386	-	-	38.842	32.2741	45.41	OK	14.0409	11.3949	16.6869	OK	19.4558	15.893	23.0187	OK	8.67874	6.91506	10.4424	OK	22.7071	18.666	26.7482	OK	5.39371	4.20539
3585	chr17	26970900	26971899	+	0	NA	intron (NM_001321561, intron 1 of 10)	intron (NM_001321561, intron 1 of 10)	778	NM_014680	9703	Hs.151761	NM_014680	ENSG00000007202	KIAA0100	BCOX|BCOX1|CT101|FMP27	KIAA0100	protein-coding	KIAA0100	-	-	KIAA0100	KIAA0100	TSS476	chr17:26926150-26972177	-	-	22.496	18.73	26.2621	OK	21.9348	18.2648	25.6047	OK	21.837	18.1884	25.4856	OK	17.8254	14.7984	20.8525	OK	22.851	19.0305	26.6716	OK	20.2439	16.8282
5795	chr6	4221626	4222625	+	0	NA	Intergenic	Intergenic	-31862	NR_125874	102724096	Hs.571140	NR_125874		LOC102724096	-	uncharacterized LOC102724096	ncRNA	LOC102724096	-	-	LOC102724096	LOC102724096	TSS22832	chr6:4186553-4190263	-	-	0.0362514	0	0.214548	OK	0	0	0	OK	0	0	0	OK	0.032783	0	0.208225	OK	0	0	0	OK	0	0
3170	chr6	116832194	116833193	+	0	NA	promoter-TSS (NM_153711)	promoter-TSS (NM_153711)	-115	NM_153711	254228	Hs.105081	NM_153711	ENSG00000178033	FAM26E	C6orf188|dJ493F7.3	family with sequence similarity 26 member E	protein-coding	FAM26E	-	-	FAM26E	FAM26E	TSS27910	chr6:116817650-116880031	-	-	6.65502	5.2493	8.06074	OK	9.52683	7.62304	11.4306	OK	7.28552	5.7455	8.82555	OK	8.09155	6.42806	9.75503	OK	13.4601	10.9102	16.0099	OK	10.4766	8.41458
5288	chr2	219924895	219925894	+	0	NA	promoter-TSS (NM_002181)	promoter-TSS (NM_002181)	-156	NM_002181	3549	Hs.654504	NM_002181	ENSG00000163501	IHH	BDA1|HHG2	indian hedgehog	protein-coding	IHH	-	-	IHH	IHH	TSS13856	chr2:219919141-219925238	-	-	0	0	0	OK	0	0	0	OK	0	0	0	OK	0.0120893	0	0.078481	OK	0.0134651	0	0.0806404	OK	0.014478	0
1988	chr19	611188	612187	+	0	NA	intron (NM_001194, intron 5 of 7)	L1MB7|LINE|L1	21794	NM_001194	610	Hs.124161	NM_001194	ENSG00000099822	HCN2	BCNG-2|BCNG2|HAC-1	hyperpolarization activated cyclic nucleotide gated potassium channel 2	protein-coding	HCN2	-	-	HCN2	HCN2	TSS16896	chr19:589892-617159	-	-	0.0222175	0	0.0773146	OK	0.0285021	0	0.0784221	OK	0.0469348	0	0.137135	OK	0.0827169	0	0.190792	OK	0.0606149	0	0.164661	OK	0.108732	0
3923	chr12	7052783	7053782	+	0	NA	non-coding (NR_126035, exon 1 of 3)	non-coding (NR_126035, exon 1 of 3)	302	NR_126035	113246	Hs.405913	NM_138425	ENSG00000111678	C12orf57	C10|GRCC10	chromosome 12 open reading frame 57	protein-coding
4128	chr11	78467905	78468904	+	0	NA	intron (NM_001098816, intron 18 of 33)	L2b|LINE|L2	-182495	NM_024678	79731	Hs.503389	NM_024678	ENSG00000137513	NARS2	DFNB94|SLM5|asnRS	asparaginyl-tRNA synthetase 2, mitochondrial (putative)	protein-coding	NARS2	-	-	NARS2	NARS2	TSS31775	chr11:78147006-78285909	-	-	17.6556	14.1166	21.1946	OK	16.1196	12.7796	19.4595	OK	18.1906	14.5479	21.8333	OK	17.9043	14.3153	21.4932	OK	18.2389	14.544	21.9339	OK	11.8391	9.29486
3730	chr13	25086468	25087467	+	0	NA	promoter-TSS (NM_006437)	promoter-TSS (NM_006437)	-19	NM_006437	143	Hs.744855	NM_006437	ENSG00000102699	PARP4	ADPRTL1|ARTD4|PARP-4|PARPL|PH5P|VAULT3|VPARP|VWA5C|p193	poly(ADP-ribose) polymerase family member 4	protein-coding	PARP4	-	-	PARP4	PARP4	TSS20519	chr13:24995068-25086948	-	-	7.62287	6.1476	9.09815	OK	11.195	9.13989	13.25	OK	5.67704	4.52411	6.82996	OK	7.44621	6.00218	8.89024	OK	6.44218	5.16043	7.72393	OK	6.98503	5.62354
3135	chr22	36397297	36398296	+	0	NA	intron (NM_001082578, intron 1 of 13)	AluJr4|SINE|Alu	26789	NM_001082579	23543	Hs.282998	NM_014309	ENSG00000100320	RBFOX2	FOX2|Fox-2|HNRBP2|HRNBP2|RBM9|RTA|dJ106I20.3|fxh	RNA binding protein, fox-1 homolog 2	protein-coding
4356	chr6	42857880	42858879	+	0	NA	TTS (NR_134563)	TTS (NR_134563)	175	NM_001008739	441150	Hs.571098	NM_001008739	ENSG00000221821	C6orf226	-	chromosome 6 open reading frame 226	protein-coding	C6orf226	-	-	C6orf226	C6orf226	TSS9187	chr6:42858002-42858554	-	-	9.85556	5.74758	13.9635	OK	16.398	10.7828	22.0133	OK	10.3978	6.32953	14.466	OK	18.6083	12.6644	24.5522	OK	15.6397	10.3237	20.9558	OK	27.5452	19.2934
3665	chr1	202317437	202318436	+	0	NA	5' UTR (NM_001167858, exon 1 of 9)	5' UTR (NM_001167858, exon 1 of 9)	106	NM_001167858	4660	Hs.444403	NM_002481	ENSG00000077157	PPP1R12B	MYPT2|PP1bp55	protein phosphatase 1 regulatory subunit 12B	protein-coding
5981	chr17	3637268	3638267	+	0	NA	intron (NM_002208, intron 21 of 30)	LTR65|LTR|ERV1	10570	NM_031965	83903	Hs.534059	NM_031965	ENSG00000177602	GSG2	HASPIN	germ cell associated 2, haspin	protein-coding	GSG2	-	-	GSG2	GSG2	TSS22791	chr17:3617918-3704537	-	-	8.32892	5.72061	10.9372	OK	6.06201	4.00146	8.12256	OK	4.08806	2.31926	5.85686	OK	5.88259	3.74751	8.01768	OK	6.93926	4.42026	9.45826	OK	2.34139	1.01037
4343	chr15	82459886	82460885	+	0	NA	intron (NR_136410, intron 15 of 19)	intron (NR_136410, intron 15 of 19)	79450	NR_120367	101929690	Hs.176109	NR_120367	ENSG00000259518	LINC01583	-	long intergenic non-protein coding RNA 1583	ncRNA	LINC01583	-	-	LINC01583	LINC01583	TSS11585	chr15:82380934-82390034	-	-	0.0435432	0	0.117612	OK	0.145943	0.0131752	0.278711	OK	0	0	0	OK	0.124032	0.00339139	0.244673	OK	0.0729142	0	0.171133	OK	0.0956535	0
4376	chr12	69978974	69979973	+	0	NA	promoter-TSS (NR_037475)	promoter-TSS (NR_037475)	11	NM_001198842	10576	Hs.189772	NM_006431	ENSG00000166226	CCT2	99D8.1|CCT-beta|CCTB|HEL-S-100n|PRO1633|TCP-1-beta	chaperonin containing TCP1 subunit 2	protein-coding
4243	chr20	48701328	48702327	+	0	NA	intron (NM_001257394, intron 1 of 2)	intron (NM_001257394, intron 1 of 2)	27908	NM_001257399	7335	Hs.420529	NM_021988	ENSG00000244687	UBE2V1	CIR1|CROC-1|CROC1|UBE2V|UEV-1|UEV1|UEV1A	ubiquitin conjugating enzyme E2 V1	protein-coding
659	chr1	119521973	119522972	+	0	NA	intron (NM_152380, intron 1 of 7)	CpG	8004	NM_001330677	6913	Hs.146196	NM_152380	ENSG00000092607	TBX15	TBX14	T-box 15	protein-coding
2774	chr15	90645107	90646106	+	0	NA	exon (NM_002168, exon 1 of 11)	exon (NM_002168, exon 1 of 11)	180	NM_001290114	3418	Hs.596461	NM_002168	ENSG00000182054	IDH2	D2HGA2|ICD-M|IDH|IDHM|IDP|IDPM|mNADP-IDH	isocitrate dehydrogenase (NADP(+)) 2, mitochondrial	protein-coding
2763	chr2	44775931	44776930	+	0	NA	intron (NM_024766, intron 3 of 10)	intron (NM_024766, intron 3 of 10)	187387	NM_024766	79823	Hs.468349	NM_024766	ENSG00000143919	CAMKMT	C2orf34|CLNMT|CaM KMT|Cam|KMT	calmodulin-lysine N-methyltransferase	protein-coding	CAMKMT	-	-	CAMKMT	CAMKMT	TSS30729	chr2:44589042-44999731	-	-	5.22759	3.73527	6.71991	OK	5.69888	4.09211	7.30566	OK	7.08371	5.19073	8.9767	OK	4.95506	3.51573	6.39438	OK	4.73234	3.33218	6.1325	OK	7.2863	5.37235
6017	chr18	691494	692493	+	0	NA	intron (NM_017512, intron 5 of 15)	intron (NM_017512, intron 5 of 15)	20524	NM_202758	55556	Hs.658550	NM_017512	ENSG00000132199	ENOSF1	RTS|TYMSAS	enolase superfamily member 1	protein-coding
1141	chr3	27524871	27525870	+	0	NA	intron (NR_135541, intron 1 of 23)	CpG	541	NM_001321107	9497	Hs.250072	NM_003615	ENSG00000033867	SLC4A7	NBC2|NBC3|NBCN1|SBC2|SLC4A6	solute carrier family 4 member 7	protein-coding
6716	chr6	110749116	110750115	+	0	NA	intron (NM_033125, intron 7 of 7)	intron (NM_033125, intron 7 of 7)	-12862	NM_004032	8528	Hs.591348	NM_003649	ENSG00000203797	DDO	DASOX|DDO-1|DDO-2	D-aspartate oxidase	protein-coding
984	chr22	39930451	39931450	+	0	NA	Intergenic	CpG	-2090	NR_130151	91582	Hs.526933	NM_194326	ENSG00000187051	RPS19BP1	AROS|S19BP	ribosomal protein S19 binding protein 1	protein-coding
1155	chr9	100797735	100798734	+	0	NA	Intergenic	AluSg|SINE|Alu	-20725	NM_018946	54187	Hs.522310	NM_018946	ENSG00000095380	NANS	HEL-S-100|SAS|SEMDCG|SEMDG	N-acetylneuraminate synthase	protein-coding	NANS	-	-	NANS	NANS	TSS5719	chr9:100818958-100845365	-	-	139.959	116.052	163.867	OK	125.668	104.074	147.263	OK	106.465	88.0103	124.92	OK	121.866	100.966	142.765	OK	183.475	152.854	214.095	OK	146.832	121.912
3372	chr14	78265981	78266980	+	0	NA	promoter-TSS (NM_001142545)	promoter-TSS (NM_001142545)	54	NM_020421	57143	Hs.413208	NM_020421	ENSG00000063761	ADCK1	-	aarF domain containing kinase 1	protein-coding	ADCK1	-	-	ADCK1	ADCK1	TSS25683	chr14:78266425-78400297	-	-	7.46478	5.68416	9.24539	OK	7.40375	5.65052	9.15698	OK	5.3791	4.03303	6.72517	OK	5.32091	3.97708	6.66474	OK	7.03219	5.34766	8.71671	OK	8.38251	6.46316
1485	chr16	2301009	2302008	+	0	NA	promoter-TSS (NM_001178029)	promoter-TSS (NM_001178029)	94	NM_001919	1632	Hs.403436	NM_001919	ENSG00000167969	ECI1	DCI	enoyl-CoA delta isomerase 1	protein-coding	ECI1	-	-	ECI1	ECI1	TSS9395	chr16:2289872-2301602	-	-	35.6276	27.7514	43.5038	OK	65.4233	52.7776	78.0691	OK	40.2019	31.9393	48.4646	OK	46.6015	37.1262	56.0768	OK	44.2835	35.0478	53.5192	OK	34.1671	26.7476
788	chr2	121297652	121298651	+	0	NA	Intergenic	Intergenic	-74226	NR_027181	84931	Hs.334519	NM_032845	ENSG00000280409	LINC01101	-	long intergenic non-protein coding RNA 1101	ncRNA
128	chr16	61832379	61833378	+	0	NA	intron (NM_001796, intron 7 of 11)	intron (NM_001796, intron 7 of 11)	237861	NM_001796	1006	Hs.368322	NM_001796	ENSG00000150394	CDH8	Nbla04261	cadherin 8	protein-coding	CDH8	-	-	CDH8	CDH8	TSS6583	chr16:61685914-62070739	-	-	1.06491	0.73523	1.3946	OK	0.587981	0.364346	0.811616	OK	0.00890856	0	0.0353997	OK	0.0945949	0.0206863	0.168504	OK	11.9846	9.74993	14.2193	OK	2.21895	1.64991
4797	chr13	101780778	101781777	+	0	NA	intron (NM_052867, intron 17 of 43)	L1MC5|LINE|L1	-184659	NR_047015	100874161	Hs.143791	NR_047015		LINC00411	-	long intergenic non-protein coding RNA 411	ncRNA	LINC00411	-	-	LINC00411	LINC00411	TSS25136	chr13:101360578-102068813	-	-	0	0	0	OK	0	0	0	OK	0	0	0	OK	0	0	0	OK	0	0	0	OK	0	0
5238	chr11	18429677	18430676	+	0	NA	TTS (NR_028500)	TTS (NR_028500)	-3677	NM_002301	3948	Hs.654377	NM_002301	ENSG00000166796	LDHC	CT32|LDH3|LDHX	lactate dehydrogenase C	protein-coding	LDHC	-	-	LDHC	LDHC	TSS7547	chr11:18433852-18472793	-	-	0	0	0	OK	0.0186847	0	0.172305	OK	0.0399766	0	0.1958	OK	0.110843	0	0.346082	OK	0.0709366	0	0.261484	OK	0.0198584	0
6630	chr20	48806970	48807969	+	0	NA	5' UTR (NM_001285879, exon 1 of 1)	5' UTR (NM_001285879, exon 1 of 1)	349	NM_005194	1051	Hs.517106	NM_005194	ENSG00000172216	CEBPB	C/EBP-beta|IL6DBP|NF-IL6|TCF5	CCAAT/enhancer binding protein beta	protein-coding	CEBPB	-	-	CEBPB	CEBPB	TSS15422	chr20:48801139-48809227	-	-	19.4655	14.9233	24.0078	OK	41.1227	32.9641	49.2814	OK	9.81888	7.20179	12.436	OK	11.3551	8.47037	14.2398	OK	13.5309	10.1147	16.947	OK	15.0226	11.3879
6335	chr16	48524936	48525935	+	0	NA	intron (NR_039970, intron 2 of 4)	intron (NR_039970, intron 2 of 4)	-106206	NM_003031	6477	Hs.706828	NM_003031	ENSG00000196470	SIAH1	SIAH1A	siah E3 ubiquitin protein ligase 1	protein-coding	SIAH1	-	-	SIAH1	SIAH1	TSS15677,TSS6271	chr16:48274602-48658037	-	-	20.448	12.7696	28.1265	OK	24.3251	16.149	32.5013	OK	15.0515	8.59398	21.5091	OK	19.3661	12.7656	25.9665	OK	19.1985	11.8016	26.5954	OK	21.7723	14.3485
6592	chr19	1523848	1524847	+	0	NA	intron (NM_001243079, intron 1 of 13)	CpG	274	NM_001243079	126520	Hs.195352	NM_001011716	ENSG00000185988	PLK5	PLK-5|PLK5P|SgK384ps	polo like kinase 5	protein-coding
4115	chr11	123095950	123096949	+	0	NA	Intergenic	Intergenic	-30436	NM_024769	79827	Hs.591949	NM_024769	ENSG00000166250	CLMP	ACAM|ASAM|CSBM|CSBS	CXADR like membrane protein	protein-coding	CLMP	-	-	CLMP	CLMP	TSS25152	chr11:122943032-123066007	-	-	153.234	128.466	178.003	OK	75.7304	63.1183	88.3426	OK	225.59	189.525	261.655	OK	76.3952	63.6345	89.1559	OK	48.0653	39.7859	56.3448	OK	33.6095	27.652
1313	chr19	47777871	47778870	+	0	NA	non-coding (NR_037675, exon 2 of 2)	non-coding (NR_037675, exon 2 of 2)	228	NM_178511	255783	Hs.128690	NM_178511	ENSG00000257704	INAFM1	PRR24	InaF motif containing 1	protein-coding	INAFM1	-	-	INAFM1	INAFM1	TSS28276,TSS4645	chr19:47777658-47778980	-	-	2.53875	0.970887	4.10661	OK	5.84848	3.41667	8.28029	OK	2.41376	1.04335	3.78417	OK	5.98124	3.55243	8.41005	OK	3.04191	1.31616	4.76766	OK	7.44666	4.61904
278	chr6	32015615	32016614	+	0	NA	intron (NM_019105, intron 29 of 43).2	intron (NM_019105, intron 29 of 43).2	-2209	NM_032470	7148	Hs.485104	NM_019105	ENSG00000168477	TNXB	EDS3|HXBL|TENX|TN-X|TNX|TNXB1|TNXB2|TNXBS|VUR8|XB|XBS	tenascin XB	protein-coding
1617	chr6	4313265	4314264	+	0	NA	Intergenic	L1M3f|LINE|L1	-114472	NR_106988	102465753		NR_106988	ENSG00000280494	MIR7641-2	B-ATF|hsa-mir-7641-2	microRNA 7641-2	ncRNA	MIR7641-2	-	-	MIR7641-2	MIR7641-2	TSS10459,TSS11276,TSS13556,TSS16091,TSS17309,TSS18236,TSS18633,TSS18916,TSS20202,TSS21422,TSS21884,TSS24507,TSS24976,TSS25776,TSS26758,TSS28385,TSS28957,TSS30345,TSS30662,TSS31442,TSS34126,TSS6460,TSS7487,TSS7756,TSS8390,TSS9081,TSS9493	chr1:228746044-228746094	-	-	0	0	0	OK	0	0	0	OK	0	0	0	OK	0	0	0	OK	0	0	0	OK	0	0
6048	chr17	73027742	73028741	+	0	NA	promoter-TSS (NR_110835)	promoter-TSS (NR_110835)	-421	NR_110835	23510	Hs.514468	NM_015353	ENSG00000180901	KCTD2	-	potassium channel tetramerization domain containing 2	protein-coding
3521	chr7	45807753	45808752	+	0	NA	intron (NR_024271, intron 1 of 12)	CpG	365	NR_024271	641977	Hs.723477	NR_024271	ENSG00000214765	SEPT7P2	SEPT13|SEPT7B	septin 7 pseudogene 2	pseudo	SEPT7P2	-	-	SEPT7P2	SEPT7P2	TSS16887	chr7:45763385-45808617	-	-	8.01913	6.17733	9.86093	OK	7.33225	5.6005	9.064	OK	4.85069	3.57748	6.1239	OK	5.37732	4.01936	6.73527	OK	8.9061	6.90043	10.9118	OK	7.62131	5.84659
490	chr15	85897363	85898362	+	0	NA	Intergenic	Intergenic	-25965	NR_106993	102465803		NR_106993	ENSG00000170776	MIR7706	hsa-mir-7706	microRNA 7706	ncRNA	MIR7706	-	-	MIR7706	MIR7706	TSS2615	chr15:85923826-86292589	-	-	6.58e-82	0	5.71079	OK	126.224	0	792.335	OK	4.78e-13	0	5.67855	OK	101.939	0	506.335	OK	13.8362	0	219.898	OK	203.986	0
1843	chr7	103104903	103105902	+	0	NA	intron (NR_110141, intron 2 of 3)	AluSx1|SINE|Alu	-18778	NM_206885	375611	Hs.585146	NM_198999	ENSG00000170615	SLC26A5	DFNB61|PRES	solute carrier family 26 member 5	protein-coding
5809	chr11	8054261	8055260	+	0	NA	Intergenic	Intergenic	-5420	NM_003320	7275	Hs.568986	NM_003320	ENSG00000166402	TUB	RDOB|rd5	tubby bipartite transcription factor	protein-coding	TUB	-	-	TUB	TUB	TSS11859,TSS14224	chr11:8060179-8190590	-	-	0.0785521	0.0139007	0.143203	OK	0.104124	0.0287695	0.179478	OK	0	0	0	OK	0.0537497	0.000575049	0.106924	OK	0.0808664	0.0122167	0.149516	OK	0.144262	0.0568313
5760	chr7	107673939	107674938	+	0	NA	intron (NM_007356, intron 31 of 33)	MIRc|SINE|MIR	-30634	NM_002291	3912	Hs.650585	NM_002291	ENSG00000091136	LAMB1	CLM|LIS5	laminin subunit beta 1	protein-coding	LAMB1	-	-	LAMB1	LAMB1	TSS22631	chr7:107564245-107643804	-	-	34.0541	28.4099	39.6983	OK	42.7279	35.7389	49.7168	OK	40.5872	33.9325	47.2418	OK	54.7886	45.9073	63.6699	OK	42.2394	35.3257	49.153	OK	80.5988	67.7002
2626	chr1	25755442	25757125	+	0	NA	Intergenic	L1ME4a|LINE|L1	-1066	NM_001282564	55219	Hs.189782	NM_018202	ENSG00000204178	TMEM57	MACOILIN	transmembrane protein 57	protein-coding
1112	chr7	7995693	7996692	+	0	NA	intron (NR_110018, intron 2 of 4)	intron (NR_110018, intron 2 of 4)	-12182	NM_138426	113263	Hs.131673	NM_138426	ENSG00000106415	GLCCI1	FAM117C|GCTR|GIG18|TSSN1	glucocorticoid induced 1	protein-coding	GLCCI1	-	-	GLCCI1	GLCCI1	TSS29649	chr7:7989469-8128709	-	-	0.531739	0.318003	0.745476	OK	0.517986	0.30644	0.729532	OK	0.529424	0.310171	0.748678	OK	0.554518	0.331954	0.777082	OK	0.688705	0.42909	0.94832	OK	1.04921	0.714239
6502	chr14	101925311	101926310	+	0	NA	Intergenic	CpG	17397	NR_135240	100507277	Hs.123543	NR_135240	ENSG00000259082	LOC100507277	-	uncharacterized LOC100507277	ncRNA
1294	chr22	27105641	27106640	+	0	NA	intron (NR_110543, intron 1 of 5)	MER53|DNA|hAT	37334	NR_110543	102724827	Hs.642767	NR_110543		MIATNB	-	MIAT neighbor (non-protein coding)	ncRNA	MIATNB	-	-	MIATNB	MIATNB	TSS7527	chr22:27053445-27176856	-	-	0.416818	0.104462	0.729174	OK	0.552745	0.0305452	1.07494	OK	0.407465	0.0875934	0.727336	OK	0.540457	0.0907693	0.990144	OK	0.58649	0.23504	0.937939	OK	0.84074	0.293684
461	chr3	136446306	136447305	+	0	NA	intron (NM_005862, intron 1 of 33)	AluSq|SINE|Alu	24440	NM_005862	10274	Hs.412586	NM_005862	ENSG00000118007	STAG1	SA1|SCC3A	stromal antigen 1	protein-coding	STAG1	-	-	STAG1	STAG1	TSS15885	chr3:136055998-136471245	-	-	12.7476	10.4399	15.0553	OK	11.3127	9.23018	13.3953	OK	12.596	10.2921	14.8999	OK	10.8826	8.86898	12.8963	OK	12.6475	10.3564	14.9386	OK	9.16289	7.43832
2712	chr11	19365934	19367817	+	0	NA	Intergenic	CpG	-5396	NM_001111018	89797	Hs.64341	NM_145117	ENSG00000166833	NAV2	HELAD1|POMFIL2|RAINB1|STEERIN2|UNC53H2	neuron navigator 2	protein-coding
1562	chr10	27531747	27532746	+	0	NA	Intergenic	Intergenic	-1178	NM_001301253	91452	Hs.530597	NM_145698	ENSG00000107897	ACBD5	-	acyl-CoA binding domain containing 5	protein-coding
1426	chr3	34047052	34048051	+	0	NA	Intergenic	LTR78|LTR|ERV1	207488	NM_001162429	10015	Hs.475896	NM_013374	ENSG00000170248	PDCD6IP	AIP1|ALIX|DRIP4|HP95	programmed cell death 6 interacting protein	protein-coding
3451	chr8	145733908	145734907	+	0	NA	promoter-TSS (NM_138431)	promoter-TSS (NM_138431)	-12	NR_130120	113655	Hs.7678	NM_138431	ENSG00000167700	MFSD3	-	major facilitator superfamily domain containing 3	protein-coding
6345	chr1	86046355	86047354	+	0	NA	intron (NM_001554, intron 1 of 4)	CpG	410	NM_001554	3491	Hs.8867	NM_001554	ENSG00000142871	CYR61	CCN1|GIG1|IGFBP10	cysteine rich angiogenic inducer 61	protein-coding	CYR61	-	-	CYR61	CYR61	TSS16543	chr1:86046443-86049648	-	-	999.037	840.558	1157.52	OK	368.725	310.101	427.349	OK	750.116	631.462	868.771	OK	282.74	237.567	327.913	OK	898.029	755.807	1040.25	OK	229.738	192.846
4640	chr3	56672296	56673295	+	0	NA	intron (NM_001112736, intron 16 of 23)	intron (NM_001112736, intron 16 of 23)	25279	NM_015224	23272	Hs.116877	NM_015224	ENSG00000163946	FAM208A	C3orf63|RAP140|TASOR|se89-1	family with sequence similarity 208 member A	protein-coding	FAM208A	-	-	FAM208A	FAM208A	TSS14393,TSS19821	chr3:56591183-56717135	-	-	6.38507	5.08959	7.68054	OK	5.47623	4.26828	6.68418	OK	8.36911	6.72705	10.0112	OK	6.28689	4.95616	7.61762	OK	4.90818	3.88164	5.93472	OK	4.73683	3.67534
1358	chr11	65487576	65488575	+	0	NA	TTS (NM_006388)	TTS (NM_006388)	334	NM_032193	84153	Hs.718438	NM_032193	ENSG00000172922	RNASEH2C	AGS3|AYP1	ribonuclease H2 subunit C	protein-coding	RNASEH2C	-	-	RNASEH2C	RNASEH2C	TSS28333	chr11:65479472-65488409	-	-	20.2851	15.1105	25.4598	OK	21.9543	16.8508	27.0578	OK	22.7344	17.5494	27.9193	OK	28.3873	22.0565	34.7182	OK	24.7499	19.1652	30.3346	OK	23.8001	17.8101
782	chr8	146126119	146127118	+	0	NA	intron (NM_021061, intron 1 of 5)	CpG	228	NM_001109689	58500	Hs.532277	NM_021061	ENSG00000196150	ZNF250	ZFP647|ZNF647	zinc finger protein 250	protein-coding
5225	chr11	118949475	118950474	+	0	NA	exon (NM_001290185, exon 15 of 17)	exon (NM_001290185, exon 15 of 17)	-5613	NM_001258208	3145	Hs.82609	NM_000190	ENSG00000256269	HMBS	PBG-D|PBGD|PORC|UPS	hydroxymethylbilane synthase	protein-coding
3647	chr16	31463765	31464764	+	0	NA	Intergenic	Intergenic	-5330	NM_001288767	79798	Hs.732945	NM_024742	ENSG00000140691	ARMC5	AIMAH2	armadillo repeat containing 5	protein-coding
2281	chr19	48893775	48894774	+	0	NA	intron (NM_006801, intron 1 of 4)	intron (NM_006801, intron 1 of 4)	536	NM_006801	10945	Hs.515515	NM_006801	ENSG00000105438	KDELR1	ERD2|ERD2.1|HDEL|PM23	KDEL endoplasmic reticulum protein retention receptor 1	protein-coding	KDELR1	-	-	KDELR1	KDELR1	TSS12938	chr19:48885826-48894810	-	-	73.6309	60.4785	86.7834	OK	78.5922	64.7156	92.4689	OK	75.746	62.389	89.1029	OK	86.7311	71.6052	101.857	OK	75.3041	61.9645	88.6437	OK	119.419	99.108
1557	chr8	128806329	128807328	+	0	NA	promoter-TSS (NR_003367)	promoter-TSS (NR_003367)	49	NR_003367	5820	Hs.133107	NR_003367	ENSG00000249859	PVT1	LINC00079|MYC|NCRNA00079|onco-lncRNA-100	Pvt1 oncogene (non-protein coding)	ncRNA	PVT1	-	-	PVT1	PVT1	TSS24022	chr8:128902873-129113499	-	-	5.65061	4.12539	7.17582	OK	4.18216	2.96247	5.40186	OK	7.39689	5.55736	9.23643	OK	5.90456	4.34648	7.46263	OK	3.69246	2.57627	4.80864	OK	2.84725	1.92207
1486	chr10	119134353	119135352	+	0	NA	5' UTR (NM_173791, exon 1 of 5)	5' UTR (NM_173791, exon 1 of 5)	126	NM_173791	118987	Hs.501149	NM_173791	ENSG00000165650	PDZD8	PDZK8	PDZ domain containing 8	protein-coding	PDZD8	-	-	PDZD8	PDZD8	TSS31417	chr10:119039999-119134978	-	-	8.36247	6.78515	9.9398	OK	6.27066	5.03162	7.5097	OK	9.62184	7.81895	11.4247	OK	6.73125	5.41329	8.0492	OK	7.57407	6.12223	9.02591	OK	7.54328	6.09686
425	chrX	153991092	153992091	+	0	NA	intron (NR_110023, intron 1 of 14)	CpG	574	NM_001363	1736	Hs.4747	NM_001363	ENSG00000130826	DKC1	CBF5|DKC|DKCX|NAP57|NOLA4|XAP101	dyskerin pseudouridine synthase 1	protein-coding	DKC1	-	-	DKC1	DKC1	TSS16369	chrX:153991016-154005964	-	-	108.273	90.7799	125.767	OK	44.5507	36.7769	52.3245	OK	85.47	71.1827	99.7574	OK	53.7232	44.5536	62.8928	OK	72.1121	59.95	84.2742	OK	37.2799	30.7057
4987	chr12	50288936	50289935	+	0	NA	intron (NM_012306, intron 5 of 11)	intron (NM_012306, intron 5 of 11)	8325	NM_012306	23017	Hs.567424	NM_012306	ENSG00000135472	FAIM2	LFG|LFG2|NGP35|NMP35|TMBIM2	Fas apoptotic inhibitory molecule 2	protein-coding	FAIM2	-	-	FAIM2	FAIM2	TSS22720	chr12:50260678-50297760	-	-	2.00371	1.45553	2.5519	OK	0.674308	0.4237	0.924916	OK	2.48729	1.86123	3.11335	OK	1.62706	1.16932	2.0848	OK	0.198259	0.0798799	0.316638	OK	0.418812	0.233591
2056	chr9	38214565	38215564	+	0	NA	Intergenic	Intergenic	-145854	NM_003028	6461	Hs.521482	NM_003028	ENSG00000107338	SHB	bA3J10.2	SH2 domain containing adaptor protein B	protein-coding	SHB	-	-	SHB	SHB	TSS5088	chr9:37915894-38069210	-	-	5.68328	4.50205	6.86451	OK	6.55048	5.2362	7.86476	OK	4.68576	3.69504	5.67648	OK	3.88496	3.02773	4.7422	OK	3.36482	2.58197	4.14767	OK	3.42838	2.65144
6510	chr15	99191605	99192604	+	0	NA	non-coding (NR_126453, exon 1 of 1)	non-coding (NR_126453, exon 1 of 1)	336	NM_001291858	3480	Hs.643120	NM_000875	ENSG00000140443	IGF1R	CD221|IGFIR|IGFR|JTK13	insulin like growth factor 1 receptor	protein-coding
5223	chrX	133707129	133708128	+	0	NA	intron (NM_001316889, intron 1 of 1)	intron (NM_001316889, intron 1 of 1)	23574	NR_038998	100506757	Hs.130961	NR_038998		LINC00629	LINC00629A|LINC00629B|LINC00629C|LINC00629D	long intergenic non-protein coding RNA 629	ncRNA	LINC00629	-	-	LINC00629	LINC00629	TSS9671	chrX:133684053-133694428	-	-	0.122656	0	0.328442	OK	0.532936	0.149008	0.916865	OK	0.119721	0	0.325103	OK	0.175279	0	0.412104	OK	0.215066	0	0.464548	OK	0.160987	0
3607	chr1	165822995	165823994	+	0	NA	intron (NM_012474, intron 1 of 6)	intron (NM_012474, intron 1 of 6)	26762	NM_012474	7371	Hs.458360	NM_012474	ENSG00000143179	UCK2	TSA903|UK|UMPK	uridine-cytidine kinase 2	protein-coding	UCK2	-	-	UCK2	UCK2	TSS26389	chr1:165796731-165880855	-	-	31.2997	25.9997	36.5997	OK	19.4395	16.0181	22.8609	OK	28.4822	23.6277	33.3368	OK	22.7482	18.7998	26.6965	OK	23.9663	19.8261	28.1064	OK	11.0319	8.94459
2876	chr7	148395846	148396845	+	0	NA	intron (NM_003592, intron 1 of 21)	CpG	412	NM_003592	8454	Hs.146806	NM_003592	ENSG00000055130	CUL1	-	cullin 1	protein-coding	CUL1	-	-	CUL1	CUL1	TSS28313	chr7:148395932-148498202	-	-	42.8867	35.5742	50.1992	OK	34.1577	28.2261	40.0894	OK	41.6738	34.5424	48.8052	OK	34.5355	28.5467	40.5244	OK	53.1832	44.2554	62.1109	OK	41.5751	34.4846
3648	chr11	68778199	68779198	+	0	NA	intron (NM_001098515, intron 1 of 2)	CpG	-1124	NR_120541	101928200	Hs.703759	NR_120541	ENSG00000256508	MRGPRF-AS1	-	MRGPRF antisense RNA 1	ncRNA	MRGPRF-AS1	-	-	MRGPRF-AS1	MRGPRF-AS1	TSS6469	chr11:68771861-68785916	-	-	0.0807992	0	0.45109	OK	0.061496	0	0.392951	OK	0.0913445	0	0.513126	OK	0.101299	0	0.4588	OK	0.014902	0	0.138658	OK	0.136761	0
3428	chr15	75952984	75953983	+	0	NA	Intergenic	Intergenic	12135	NM_001318146	257364	Hs.8705	NM_153271	ENSG00000173548	SNX33	SH3PX3|SH3PXD3C|SNX30	sorting nexin 33	protein-coding
781	chr2	47630163	47631162	+	0	NA	intron (NM_000251, intron 1 of 15)	CpG	456	NM_001258281	4436	Hs.597656	NM_000251	ENSG00000095002	MSH2	COCA1|FCC1|HNPCC|HNPCC1|LCFS2	mutS homolog 2	protein-coding
3015	chr3	25534977	25535976	+	0	NA	intron (NM_001290217, intron 2 of 7)	intron (NM_001290217, intron 2 of 7)	35675	NM_001290217	5915	Hs.543218	NM_000965	ENSG00000077092	RARB	HAP|MCOPS12|NR1B2|RARbeta1|RRB2	retinoic acid receptor beta	protein-coding
6490	chr13	111566135	111567696	+	0	NA	intron (NR_104586, intron 1 of 4)	CpG	539	NR_104586	55608	Hs.525163	NM_017664	ENSG00000088448	ANKRD10	-	ankyrin repeat domain 10	protein-coding
5589	chr14	71414098	71415097	+	0	NA	intron (NM_014982, intron 2 of 35)	MER11B|LTR|ERVK	40475	NM_001308160	22990	Hs.446559	NM_014982	ENSG00000100731	PCNX1	PCNX|PCNXL1|pecanex	pecanex homolog 1 (Drosophila)	protein-coding
1950	chr7	23338617	23339616	+	0	NA	exon (NM_138446, exon 1 of 4)	exon (NM_138446, exon 1 of 4)	176	NM_138446	115416	Hs.87385	NM_138446	ENSG00000156928	MALSU1	C7orf30|mtRsfA	mitochondrial assembly of ribosomal large subunit 1	protein-coding	MALSU1	-	-	MALSU1	MALSU1	TSS30909	chr7:23338939-23349180	-	-	84.3853	67.6969	101.074	OK	75.1668	60.0175	90.3162	OK	89.8165	72.4064	107.227	OK	94.187	76.1539	112.22	OK	79.6206	63.9704	95.2709	OK	84.0234	67.5299
2782	chr21	46521842	46522841	+	0	NA	intron (NM_001346688, intron 1 of 11)	intron (NM_001346688, intron 1 of 11)	27375	NM_001346688	104	Hs.474018	NM_001112	ENSG00000197381	ADARB1	ADAR2|DRABA2|DRADA2|RED1	adenosine deaminase, RNA specific B1	protein-coding
5748	chr6	26031448	26032447	+	0	NA	exon (NM_003537, exon 1 of 1)	exon (NM_003537, exon 1 of 1)	341	NM_003537	8358	Hs.533292	NM_003537	ENSG00000274267	HIST1H3B	H3/l|H3FL	histone cluster 1 H3 family member b	protein-coding	HIST1H3B	-	-	HIST1H3B	HIST1H3B	TSS12505	chr6:26031816-26032288	-	-	0.465184	0	1.61483	OK	2.27387	0.39421	4.15353	OK	0.64849	0	1.76518	OK	3.82013	1.40789	6.23238	OK	1.16081	0	2.44891	OK	1.56168	0.0259772
5720	chr17	11861415	11862414	+	0	NA	intron (NM_004662, intron 13 of 14)	L1MC1|LINE|L1	38775	NM_144680	7566	Hs.370473	NM_144680	ENSG00000154957	ZNF18	HDSG1|KOX11|ZKSCAN6|ZNF535|ZSCAN38|Zfp535	zinc finger protein 18	protein-coding	ZNF18	-	-	ZNF18	ZNF18	TSS21924,TSS7451	chr17:11880755-11900827	-	-	4.7111	3.49743	5.92476	OK	5.33704	4.00734	6.66674	OK	4.79542	3.56343	6.02741	OK	4.98892	3.72841	6.24942	OK	4.51953	3.34892	5.69015	OK	4.8515	3.61702
5044	chr1	45241871	45242870	+	0	NA	TTS (NR_000015)	TTS (NR_000015)	206	NR_000024	94161		NR_000024	ENSG00000200913	SNORD46	RNU40|RNU46|U40|U46	small nucleolar RNA, C/D box 46	snoRNA	SNORD46	-	-	SNORD46	SNORD46	TSS13543	chr1:45241245-45244412	-	-	0	0	0	OK	0	0	0	OK	6.29764	1.92196	10.6733	OK	0	0	0	OK	0	0	0	OK	0	0
2037	chrX	65086336	65087335	+	0	NA	Intergenic	MIR3|SINE|MIR	-151877	NR_029637	407008		NR_029637	ENSG00000274536	MIR223	MIRN223|miRNA223|mir-223	microRNA 223	ncRNA	MIR223	-	-	MIR223	MIR223	TSS11771	chrX:65238711-65238821	-	-	0	0	0	OK	0	0	0	OK	0	0	0	OK	0	0	0	OK	0	0	0	OK	0	0
5578	chr12	109003527	109004526	+	0	NA	Intergenic	Intergenic	-12132	NM_181724	338773	Hs.449718	NM_181724	ENSG00000183160	TMEM119	OBIF	transmembrane protein 119	protein-coding	TMEM119	-	-	TMEM119	TMEM119	TSS2856	chr12:108983621-108991894	-	-	0.254712	0.0697747	0.439649	OK	0.385619	0.153747	0.617491	OK	0	0	0	OK	0.0497297	0	0.120594	OK	0.0520484	0	0.12605	OK	0.0101608	0
5327	chr3	44919733	44920732	+	0	NA	intron (NM_003241, intron 1 of 13)	AluSz|SINE|Alu	4134	NM_003241	7047	Hs.438265	NM_003241	ENSG00000163810	TGM4	TGP|hTGP	transglutaminase 4	protein-coding	TGM4	-	-	TGM4	TGM4	TSS15467	chr3:44916097-44956088	-	-	0	0	0	OK	0.074523	0	0.160934	OK	0	0	0	OK	0.0366327	0	0.0931394	OK	0.0599	0	0.140373	OK	0.00643679	0
532	chr3	170136127	170137126	+	0	NA	promoter-TSS (NM_005602)	promoter-TSS (NM_005602)	-27	NM_005602	5010	Hs.31595	NM_005602	ENSG00000013297	CLDN11	OSP|OTM	claudin 11	protein-coding	CLDN11	-	-	CLDN11	CLDN11	TSS14238,TSS3249	chr3:170136652-170152479	-	-	40.4399	33.377	47.5029	OK	42.3155	34.949	49.6821	OK	28.9676	23.6759	34.2594	OK	27.2581	22.288	32.2282	OK	13.2092	10.5428	15.8757	OK	4.29185	3.19321
1193	chr13	99852448	99853447	+	0	NA	promoter-TSS (NR_036532)	promoter-TSS (NR_036532)	62	NR_036532	100289373	Hs.225914	NR_036531	ENSG00000228889	UBAC2-AS1	-	UBAC2 antisense RNA 1	ncRNA
3963	chr19	8539633	8540632	+	0	NA	intron (NM_031203, intron 13 of 16)	intron (NM_031203, intron 13 of 16)	27406	NM_032152	84106	Hs.465812	NM_032152	ENSG00000133246	PRAM1	PML-RAR|PRAM-1	PML-RARA regulated adaptor molecule 1	protein-coding	PRAM1	-	-	PRAM1	PRAM1	TSS5265	chr19:8554939-8567538	-	-	0	0	0	OK	0	0	0	OK	0	0	0	OK	0	0	0	OK	0	0	0	OK	0.0157463	0
2455	chr11	10878859	10879858	+	0	NA	promoter-TSS (NR_034137)	promoter-TSS (NR_034137)	262	NM_001143667	58486	Hs.655066	NM_021211	ENSG00000236287	ZBED5	Buster1	zinc finger BED-type containing 5	protein-coding
55	chr1	211306939	211307938	+	0	NA	promoter-TSS (NM_002238)	promoter-TSS (NM_002238)	19	NM_002238	3756	Hs.553187	NM_002238	ENSG00000143473	KCNH1	EAG|EAG1|Kv10.1|TMBTS|ZLS1|h-eag|hEAG1	potassium voltage-gated channel subfamily H member 1	protein-coding	KCNH1	-	-	KCNH1	KCNH1	TSS16948	chr1:210851656-211307457	-	-	0.183874	0.0958476	0.271901	OK	0.176141	0.0901217	0.262159	OK	0.0123477	0	0.0408176	OK	0.108325	0.0431073	0.173542	OK	0.208248	0.112714	0.303782	OK	0.0984213	0.0353205
3592	chr7	111776870	111777869	+	0	NA	intron (NM_014705, intron 1 of 51)	L3|LINE|CR1	69093	NM_014705	9732	Hs.654652	NM_014705	ENSG00000128512	DOCK4	-	dedicator of cytokinesis 4	protein-coding	DOCK4	-	-	DOCK4	DOCK4	TSS19231	chr7:111366163-111846462	-	-	1.08309	0.798501	1.36769	OK	0.980959	0.714685	1.24723	OK	2.93653	2.30833	3.56473	OK	1.73895	1.32638	2.15152	OK	0.392227	0.25254	0.531914	OK	0.510963	0.343858
1890	chr12	34021532	34022531	+	0	NA	Intergenic	Intergenic	-153185	NM_032834	84920	Hs.102971	NM_032834	ENSG00000139133	ALG10	ALG10A|DIE2|KCR1	ALG10, alpha-1,2-glucosyltransferase	protein-coding	ALG10	-	-	ALG10	ALG10	TSS4165	chr12:34175215-34181236	-	-	2.08919	1.47444	2.70393	OK	1.65806	1.12673	2.1894	OK	1.25892	0.806466	1.71138	OK	1.19177	0.770682	1.61287	OK	1.13284	0.728902	1.53678	OK	0.546854	0.293801
6281	chr5	158530188	158531187	+	0	NA	intron (NR_109890, intron 1 of 2)	intron (NR_109890, intron 1 of 2)	3196	NR_109890	101927740	Hs.738721	NR_109890	ENSG00000245812	LOC101927740	-	uncharacterized LOC101927740	ncRNA	LOC101927740	-	-	LOC101927740	LOC101927740	TSS26865	chr5:158527490-158544486	-	-	0.264817	0.0935621	0.436071	OK	0.390094	0.178893	0.601294	OK	0.278765	0.101256	0.456274	OK	0.283335	0.104229	0.462441	OK	0.604098	0.326161	0.882034	OK	0.704055	0.404592
6134	chr14	24563632	24564631	+	0	NA	intron (NM_001291556, intron 2 of 9)	intron (NM_001291556, intron 2 of 9)	641	NM_001308054	5106	Hs.75812	NM_004563	ENSG00000100889	PCK2	PEPCK|PEPCK-M|PEPCK2	phosphoenolpyruvate carboxykinase 2, mitochondrial	protein-coding
1681	chr20	43966064	43967063	+	0	NA	intron (NM_002999, intron 1 of 4)	intron (NM_002999, intron 1 of 4)	10501	NM_002999	6385	Hs.632267	NM_002999	ENSG00000124145	SDC4	SYND4	syndecan 4	protein-coding	SDC4	-	-	SDC4	SDC4	TSS14111	chr20:43953928-43977064	-	-	121.098	101.316	140.88	OK	69.8201	58.0271	81.6132	OK	132.753	111.115	154.391	OK	47.7906	39.5025	56.0786	OK	58.8318	48.7932	68.8704	OK	25.8798	21.0851
872	chr7	131750143	131751142	+	0	NA	Intergenic	Intergenic	155663	NR_110836	101928782	Hs.571369	NR_110836	ENSG00000224865	LOC101928782	-	uncharacterized LOC101928782	ncRNA	LOC101928782	-	-	LOC101928782	LOC101928782	TSS1829	chr7:131594978-131633712	-	-	0	0	0	OK	0	0	0	OK	0	0	0	OK	0	0	0	OK	0	0	0	OK	0	0
6434	chr11	1592560	1594327	+	0	NA	promoter-TSS (NR_021489)	promoter-TSS (NR_021489)	-293	NM_004420	1850	Hs.41688	NM_004420	ENSG00000184545	DUSP8	C11orf81|HB5|HVH-5|HVH8	dual specificity phosphatase 8	protein-coding	DUSP8	-	-	DUSP8	DUSP8	TSS6886	chr11:1575280-1593150	-	-	0.0390774	0	0.0977878	OK	0.0307224	0	0.087177	OK	0.00621948	0	0.0372906	OK	0.0175449	0	0.0516342	OK	0.062747	0	0.146241	OK	0.0140304	0
1146	chr16	89647440	89648439	+	0	NA	intron (NM_014427, intron 3 of 16)	intron (NM_014427, intron 3 of 16)	5763	NM_153636	27132	Hs.461775	NM_014427	ENSG00000178773	CPNE7	-	copine 7	protein-coding
395	chr17	14647621	14648620	+	0	NA	Intergenic	Intergenic	-270002	NR_135638	101928475	Hs.638944	NR_135638	ENSG00000232058	LOC101928475	-	uncharacterized LOC101928475	ncRNA
89	chr7	156400929	156401928	+	0	NA	Intergenic	AluSx1|SINE|Alu	-5539	NR_103858	100506380	Hs.721001	NR_103858	ENSG00000182648	LINC01006	C7orf13|MY040	long intergenic non-protein coding RNA 1006	ncRNA	LINC01006	-	-	LINC01006	LINC01006	TSS26668	chr7:156264792-156395889	-	-	0	0	0	OK	0	0	0	OK	0	0	0	OK	0	0	0	OK	0.039497	0	0.226777	OK	0.0775239	0
988	chr20	62198394	62199393	+	0	NA	exon (NM_033405, exon 1 of 14)	exon (NM_033405, exon 1 of 14)	214	NM_033405	85441	Hs.517180	NM_033405	ENSG00000130589	HELZ2	PDIP-1|PRIC285	helicase with zinc finger 2	protein-coding	HELZ2	-	-	HELZ2	HELZ2	TSS30459,TSS33122	chr20:62189438-62205592	-	-	0.344184	0.204306	0.484062	OK	0.648953	0.448085	0.849822	OK	0.48759	0.32689	0.648291	OK	0.770147	0.543967	0.996327	OK	0.366812	0.229006	0.504618	OK	0.816216	0.576901
5848	chr12	18685204	18686203	+	0	NA	intron (NM_004570, intron 23 of 31)	L1MD1|LINE|L1	204740	NM_001330769	89869	Hs.97542	NM_033123	ENSG00000139151	PLCZ1	NYD-SP27|PLC-zeta-1|PLCzeta|SPGF17	phospholipase C zeta 1	protein-coding
4342	chr1	68073510	68074509	+	0	NA	Intergenic	AluJr|SINE|Alu	-76851	NM_001199741	1647	Hs.80409	NM_001924	ENSG00000116717	GADD45A	DDIT1|GADD45	growth arrest and DNA damage inducible alpha	protein-coding
3584	chr19	47624905	47625904	+	0	NA	Intergenic	AluSx1|SINE|Alu	-8395	NM_015168	23211	Hs.104661	NM_015168	ENSG00000130749	ZC3H4	C19orf7	zinc finger CCCH-type containing 4	protein-coding	ZC3H4	-	-	ZC3H4	ZC3H4	TSS21472	chr19:47567446-47617009	-	-	0.944237	0.637546	1.25093	OK	0.843478	0.567624	1.11933	OK	1.13566	0.8001	1.47122	OK	1.34913	0.96622	1.73205	OK	1.07288	0.744828	1.40093	OK	1.15373	0.802805
2295	chr4	84128594	84129593	+	0	NA	Intergenic	LTR19A|LTR|ERV1	76974	NM_015697	27235	Hs.144304	NM_015697	ENSG00000173085	COQ2	CL640|COQ10D1|MSA1|PHB:PPT	coenzyme Q2, polyprenyltransferase	protein-coding	COQ2	-	-	COQ2	COQ2	TSS7081	chr4:84184976-84206067	-	-	10.4892	7.98393	12.9945	OK	14.7334	11.4475	18.0193	OK	14.7396	11.4335	18.0458	OK	18.5338	14.574	22.4935	OK	8.65516	6.49551	10.8148	OK	6.58051	4.81516
1550	chr18	21951725	21952724	+	0	NA	intron (NM_080597, intron 2 of 27)	AluJr|SINE|Alu	25609	NM_080597	114876	Hs.370725	NM_018030	ENSG00000141447	OSBPL1A	ORP-1|ORP1|OSBPL1B	oxysterol binding protein like 1A	protein-coding
1454	chr20	19679056	19680055	+	0	NA	intron (NM_020689, intron 15 of 16)	MER58B|DNA|hAT-Charlie	-187610	NM_001242581	54453	Hs.472270	NM_018993	ENSG00000132669	RIN2	MACS|RASSF4	Ras and Rab interactor 2	protein-coding
2533	chr20	23250877	23251876	+	0	NA	Intergenic	Intergenic	-79997	NM_013248	29107	Hs.516933	NM_013248	ENSG00000132661	NXT1	MTR2|P15	nuclear transport factor 2 like export factor 1	protein-coding	NXT1	-	-	NXT1	NXT1	TSS4016	chr20:23331372-23335408	-	-	64.944	52.6874	77.2005	OK	34.6396	27.4573	41.822	OK	63.1935	51.3333	75.0537	OK	51.0855	41.2088	60.9621	OK	46.7251	37.5376	55.9126	OK	27.3108	21.4027
3960	chr6	11940157	11941156	+	0	NA	Intergenic	MER58A|DNA|hAT-Charlie	60821	NR_125853	101928253	Hs.128163	NR_125853		LOC101928253	-	uncharacterized LOC101928253	ncRNA	LOC101928253	-	-	LOC101928253	LOC101928253	TSS7858	chr6:11990575-12001477	-	-	0	0	0	OK	0	0	0	OK	0	0	0	OK	0	0	0	OK	0	0	0	OK	0	0
5117	chr1	841767	842766	+	0	NA	Intergenic	Intergenic	12806	NR_026874	100130417	Hs.200644	NM_175912	ENSG00000223764	LOC100130417	-	uncharacterized LOC100130417	ncRNA
4434	chr7	83364640	83365639	+	0	NA	Intergenic	MER5A|DNA|hAT-Charlie	-86660	NM_012431	9723	Hs.528721	NM_012431	ENSG00000170381	SEMA3E	M-SEMAH|M-SemaK|SEMAH|coll-5	semaphorin 3E	protein-coding	SEMA3E	-	-	SEMA3E	SEMA3E	TSS30342,TSS6031	chr7:82993221-83278479	-	-	0.563774	0.376137	0.751411	OK	0.316967	0.177491	0.456442	OK	0.0117781	0	0.0509682	OK	0.0842117	0.020661	0.147762	OK	0.0803242	0.00805867	0.15259	OK	0.222582	0.113375
1584	chr19	41140060	41141059	+	0	NA	Intergenic	Intergenic	33282	NM_001042545	8425	Hs.466766	NM_003573	ENSG00000090006	LTBP4	ARCL1C|LTBP-4|LTBP4L|LTBP4S	latent transforming growth factor beta binding protein 4	protein-coding
1675	chr7	27086502	27087501	+	0	NA	Intergenic	AluSx1|SINE|Alu	48624	NM_005522	3198	Hs.67397	NM_005522	ENSG00000105991	HOXA1	BSAS|HOX1|HOX1F	homeobox A1	protein-coding	HOXA1	-	-	HOXA1	HOXA1	TSS1429	chr7:27132613-27135625	-	-	0.8325	0.463448	1.20155	OK	0.560695	0.271362	0.850027	OK	0.480061	0.200321	0.7598	OK	0.415548	0.148766	0.682329	OK	0.78767	0.417794	1.15755	OK	0.421243	0.128243
649	chr5	150472741	150473740	+	0	NA	Intergenic	Intergenic	-6019	NM_001252390	10318	Hs.355141	NM_006058	ENSG00000145901	TNIP1	ABIN-1|NAF1|VAN|nip40-1	TNFAIP3 interacting protein 1	protein-coding
5527	chr16	3073406	3074884	+	0	NA	5' UTR (NM_001002017, exon 1 of 3)	5' UTR (NM_001002017, exon 1 of 3)	125	NM_001142350	79228	Hs.412304	NM_024339	ENSG00000131652	THOC6	WDR58|fSAP35	THO complex 6	protein-coding
6038	chr5	148867373	148868372	+	0	NA	Intergenic	AluSz6|SINE|Alu	57663	NR_029686	406937		NR_029686	ENSG00000276365	MIR145	MIRN145|miR-145|miRNA145	microRNA 145	ncRNA	MIR145	-	-	MIR145	MIR145	TSS3534	chr5:148786407-148812399	-	-	0	0	0	OK	0	0	0	OK	0	0	0	OK	0	0	0	OK	0	0	0	OK	0	0
3903	chr1	59220868	59221867	+	0	NA	Intergenic	Intergenic	28418	NM_002228	3725	Hs.696684	NM_002228	ENSG00000177606	JUN	AP-1|AP1|c-Jun	Jun proto-oncogene, AP-1 transcription factor subunit	protein-coding	JUN	-	-	JUN	JUN	TSS8204	chr1:59246462-59249785	-	-	62.0366	51.0389	73.0343	OK	53.653	44.3786	62.9273	OK	64.1912	53.2462	75.1363	OK	64.4555	53.4338	75.4772	OK	42.9641	35.3896	50.5385	OK	21.6652	17.555
2150	chr1	17027479	17028478	+	0	NA	intron (NR_026567, intron 6 of 10)	intron (NR_026567, intron 6 of 10)	18674	NR_026567	284729	Hs.548239	NR_026567	ENSG00000268869	ESPNP	dJ1182A14.1	espin pseudogene	pseudo	ESPNP	-	-	ESPNP	ESPNP	TSS30535	chr1:17017712-17046652	-	-	0	0	0	OK	0	0	0	OK	0.0135037	0	0.0827709	OK	0.0132009	0	0.0833804	OK	0	0	0	OK	0	0
1318	chr17	76249883	76250882	+	0	NA	Intergenic	CpG	22991	NM_001204212	283999	Hs.632228	NM_001145529	ENSG00000204278	TMEM235	ARGM1	transmembrane protein 235	protein-coding
642	chr8	38794220	38795219	+	0	NA	intron (NM_021623, intron 3 of 12)	intron (NM_021623, intron 3 of 12)	35966	NM_021623	59339	Hs.369123	NM_021623	ENSG00000169499	PLEKHA2	TAPP2	pleckstrin homology domain containing A2	protein-coding	PLEKHA2	-	-	PLEKHA2	PLEKHA2	TSS25196	chr8:38758752-38831430	-	-	2.32538	1.75441	2.89635	OK	2.16315	1.62242	2.70387	OK	1.54187	1.11485	1.96888	OK	2.29161	1.72692	2.8563	OK	2.05943	1.53993	2.57892	OK	1.77785	1.3126
5965	chr20	48067579	48068578	+	0	NA	intron (NM_004975, intron 1 of 1)	MIR|SINE|MIR	31103	NM_004975	3745	Hs.84244	NM_004975	ENSG00000158445	KCNB1	DRK1|Kv2.1	potassium voltage-gated channel subfamily B member 1	protein-coding	KCNB1	-	-	KCNB1	KCNB1	TSS25177	chr20:47988504-48099181	-	-	0.00565966	0	0.0405038	OK	0.00543987	0	0.0397227	OK	0	0	0	OK	0	0	0	OK	0.0104808	0	0.0450907	OK	0.0248807	0
1764	chr11	34139329	34140328	+	0	NA	exon (NM_001144030, exon 5 of 27)	exon (NM_001144030, exon 5 of 27)	12717	NM_001144030	55226	Hs.577281	NM_024662	ENSG00000135372	NAT10	ALP|NET43	N-acetyltransferase 10	protein-coding
3348	chr12	124063673	124064672	+	0	NA	Intergenic	Intergenic	4702	NR_110049	101927415	Hs.636524	NR_110049		LOC101927415	-	uncharacterized LOC101927415	ncRNA	LOC101927415	-	-	LOC101927415	LOC101927415	TSS20120	chr12:124065612-124068874	-	-	0.0391854	0	0.131272	OK	0.0985068	0	0.219238	OK	0.0905967	0	0.211135	OK	0.092755	0	0.217819	OK	0.065204	0	0.166668	OK	0.053296	0
1908	chr1	210412850	210413849	+	0	NA	intron (NM_019605, intron 3 of 3)	intron (NM_019605, intron 3 of 3)	-5883	NR_024337	574036	Hs.446946	NR_024337	ENSG00000203706	SERTAD4-AS1	C1orf133	SERTAD4 antisense RNA 1	ncRNA	SERTAD4-AS1	-	-	SERTAD4-AS1	SERTAD4-AS1	TSS9829	chr1:210404803-210416440	-	-	3.52181	0.690044	6.35359	OK	4.59091	0.808824	8.37299	OK	3.51261	0.743113	6.28211	OK	13.889	6.09094	21.6871	OK	6.15597	3.00283	9.30911	OK	8.12609	1.97989
6480	chr12	127650103	127651102	+	0	NA	Intergenic	LSU-rRNA_Hsa|rRNA|rRNA	-105660	NR_104646	101927592	Hs.385663	NR_104646	ENSG00000249345	LOC101927592	-	uncharacterized LOC101927592	ncRNA	LOC101927592	-	-	LOC101927592	LOC101927592	TSS20397	chr12:127399773-127544942	-	-	0	0	0	OK	0	0	0	OK	0	0	0	OK	0.0327124	0	0.132342	OK	0	0	0	OK	0	0
4291	chr5	137454369	137455368	+	0	NA	intron (NM_003551, intron 4 of 5)	AluSx|SINE|Alu	20264	NM_003551	8382	Hs.730856	NM_003551	ENSG00000112981	NME5	NM23-H5|NM23H5|RSPH23	NME/NM23 family member 5	protein-coding	NME5	-	-	NME5	NME5	TSS20504	chr5:137450860-137475132	-	-	0	0	0	OK	0	0	0	OK	0	0	0	OK	0	0	0	OK	0	0	0	OK	0	0
6290	chr14	58779591	58780590	+	0	NA	intron (NM_023001, intron 5 of 22)	MER1B|DNA|hAT-Charlie	14868	NM_023000	5926	Hs.161000	NM_002892	ENSG00000032219	ARID4A	RBBP-1|RBBP1|RBP-1|RBP1	AT-rich interaction domain 4A	protein-coding
2792	chr12	76952749	76953748	+	0	NA	5' UTR (NM_001319653, exon 1 of 24)	5' UTR (NM_001319653, exon 1 of 24)	341	NM_020841	114882	Hs.430849	NM_020841	ENSG00000091039	OSBPL8	MST120|MSTP120|ORP8|OSBP10	oxysterol binding protein like 8	protein-coding	OSBPL8	-	-	OSBPL8	OSBPL8	TSS8057	chr12:76745577-76953589	-	-	14.1865	11.7129	16.66	OK	15.6658	12.9527	18.379	OK	13.2797	10.9096	15.6498	OK	13.8683	11.4346	16.302	OK	15.1572	12.5428	17.7717	OK	15.6263	12.9358
1718	chr1	41433106	41434105	+	0	NA	Intergenic	L2a|LINE|L2	-11366	NR_125440	1503	Hs.473087	NM_001905	ENSG00000171793	CTPS1	CTPS|IMD24	CTP synthase 1	protein-coding
1098	chr1	10790745	10791744	+	0	NA	intron (NM_017766, intron 2 of 15)	Charlie1a|DNA|hAT-Charlie	65489	NM_001079843	54897	Hs.439894	NM_017766	ENSG00000130940	CASZ1	CAS11|CST|SRG|ZNF693|dJ734G22.1	castor zinc finger 1	protein-coding
6748	chr7	133002424	133003423	+	0	NA	intron (NM_001037126, intron 5 of 9)	intron (NM_001037126, intron 5 of 9)	27288	NR_106749	102465139		NR_106749	ENSG00000276137	MIR6133	hsa-mir-6133	microRNA 6133	ncRNA	MIR6133	-	-	MIR6133	MIR6133	TSS4978	chr7:132937822-133750513	-	-	0	0	0	OK	0	0	0	OK	0	0	0	OK	0	0	0	OK	0	0	0	OK	0	0
3003	chr11	62789507	62790506	+	0	NA	Intergenic	Intergenic	-6689	NM_001184736	9376	Hs.266223	NM_004254	ENSG00000149452	SLC22A8	OAT3	solute carrier family 22 member 8	protein-coding
4849	chr15	63340204	63341203	+	0	NA	promoter-TSS (NM_001301289)	promoter-TSS (NM_001301289)	67	NM_001018008	7168	Hs.133892	NM_000366	ENSG00000140416	TPM1	C15orf13|CMD1Y|CMH3|HEL-S-265|HTM-alpha|LVNC9|TMSA	tropomyosin 1 (alpha)	protein-coding
6242	chr10	10548468	10549467	+	0	NA	intron (NM_001326319, intron 1 of 16)	intron (NM_001326319, intron 1 of 16)	44489	NM_001326321	10659	Hs.309288	NM_006561	ENSG00000048740	CELF2	BRUNOL3|CELF-2|CUG-BP2|CUGBP2|ETR-3|ETR3|NAPOR	CUGBP, Elav-like family member 2	protein-coding
5018	chr16	57651947	57652946	+	0	NA	Intergenic	AluSx1|SINE|Alu	-1159	NM_001290143	9289	Hs.513633	NM_005682	ENSG00000205336	ADGRG1	BFPP|BPPR|GPR56|TM7LN4|TM7XN1	adhesion G protein-coupled receptor G1	protein-coding
2665	chr17	63175874	63176873	+	0	NA	intron (NM_003835, intron 9 of 18)	intron (NM_003835, intron 9 of 18)	42917	NM_001081955	8787	Hs.664380	NM_003835	ENSG00000108370	RGS9	PERRS|RGS9L	regulator of G-protein signaling 9	protein-coding
4609	chr6	2931588	2932587	+	0	NA	Intergenic	LTR50|LTR|ERVL	-28541	NM_004155	5272	Hs.104879	NM_004155	ENSG00000170542	SERPINB9	CAP-3|CAP3|PI-9|PI9	serpin family B member 9	protein-coding	SERPINB9	-	-	SERPINB9	SERPINB9	TSS9218	chr6:2884221-2903546	-	-	0.054724	0	0.130825	OK	0.0366401	0	0.0912667	OK	0	0	0	OK	0.0388333	0	0.092494	OK	0.082105	0.00676488	0.157445	OK	0.0708143	0.00279452
5592	chr11	27230785	27231784	+	0	NA	intron (NR_125766, intron 2 of 4)	intron (NR_125766, intron 2 of 4)	9031	NR_125768	103695435	Hs.196133	NR_125766	ENSG00000254560	BBOX1-AS1	-	BBOX1 antisense RNA 1	ncRNA
184	chr13	41841353	41842352	+	0	NA	Intergenic	AluJb|SINE|Alu	-4139	NM_004294	9617	Hs.382176	NM_004294	ENSG00000120662	MTRF1	MRF1|MTTRF1|RF1	mitochondrial translation release factor 1	protein-coding	MTRF1	-	-	MTRF1	MTRF1	TSS24056	chr13:41707063-41837713	-	-	2.68421	1.61509	3.75333	OK	3.09815	1.84208	4.35422	OK	2.15548	1.03187	3.27908	OK	3.15007	1.98781	4.31232	OK	1.95202	0.976096	2.92795	OK	3.77025	2.38134
776	chr10	104402159	104403158	+	0	NA	Intergenic	CpG	-1594	NM_001345950	81603	Hs.336810	NM_030912	ENSG00000171206	TRIM8	GERP|RNF27	tripartite motif containing 8	protein-coding
3738	chr13	100093660	100094659	+	0	NA	Intergenic	MLT1C|LTR|ERVL-MaLR	57401	NR_110731	102725509	Hs.648968	NR_110731		LINC01232	TCONS_00021520	long intergenic non-protein coding RNA 1232	ncRNA	LINC01232	-	-	LINC01232	LINC01232	TSS25450	chr13:100139215-100151560	-	-	0	0	0	OK	0.0130507	0	0.0874172	OK	0	0	0	OK	0.0366869	0	0.112749	OK	0	0	0	OK	0.0132037	0
1570	chr3	71545576	71546575	+	0	NA	intron (NM_001012505, intron 2 of 6)	intron (NM_001012505, intron 2 of 6)	45165	NR_031697	100302112		NR_031697	ENSG00000221264	MIR1284	MIRN1284|hsa-mir-1284|mir-1284	microRNA 1284	ncRNA	MIR1284	-	-	MIR1284	MIR1284	TSS18185	chr3:71003864-71633140	-	-	0	0	0	OK	0	0	0	OK	0	0	0	OK	0	0	0	OK	0	0	0	OK	0	0
6381	chr1	40254253	40255252	+	0	NA	promoter-TSS (NM_001720)	promoter-TSS (NM_001720)	104	NR_135805	101929536	Hs.552820	NR_135805	ENSG00000261798	LOC101929536	-	uncharacterized LOC101929536	ncRNA
2673	chr5	5422357	5423356	+	0	NA	promoter-TSS (NM_015325)	promoter-TSS (NM_015325)	70	NM_015325	23379	Hs.449296	NM_015325	ENSG00000164151	ICE1	KIAA0947	interactor of little elongation complex ELL subunit 1	protein-coding	ICE1	-	-	ICE1	ICE1	TSS11101	chr5:5422785-5490347	-	-	5.22654	4.22216	6.23093	OK	5.6855	4.60216	6.76884	OK	5.71667	4.62439	6.80896	OK	4.98719	4.01814	5.95625	OK	4.96721	4.00287	5.93155	OK	5.14865	4.15536
5625	chr16	57112447	57113446	+	0	NA	intron (NM_001330552, intron 42 of 47)	intron (NM_001330552, intron 42 of 47)	-13509	NM_152727	221184	Hs.339809	NM_152727	ENSG00000140848	CPNE2	COPN2|CPN2	copine 2	protein-coding	CPNE2	-	-	CPNE2	CPNE2	TSS24263	chr16:57126454-57181878	-	-	13.9429	10.9794	16.9063	OK	15.4338	12.2467	18.6209	OK	8.62366	6.6624	10.5849	OK	5.75537	4.29561	7.21513	OK	8.78526	6.73821	10.8323	OK	9.13937	7.05978
1269	chr21	39543475	39544474	+	0	NA	Intergenic	Intergenic	-34276	NR_027695	259234	Hs.147695	NM_148676	ENSG00000233316	DSCR10	-	Down syndrome critical region 10 (non-protein coding)	ncRNA
181	chr2	26108389	26109388	+	0	NA	Intergenic	AluJb|SINE|Alu	-7576	NM_018263	55252	Hs.119815	NM_018263	ENSG00000143970	ASXL2	ASXH2|SHAPNS	additional sex combs like 2, transcriptional regulator	protein-coding	ASXL2	-	-	ASXL2	ASXL2	TSS3719	chr2:25962252-26101312	-	-	1.52964	1.1494	1.90987	OK	1.58334	1.19003	1.97664	OK	1.73361	1.31328	2.15393	OK	1.16947	0.857967	1.48098	OK	1.29872	0.960808	1.63663	OK	1.47506	1.09968
412	chr7	5832829	5833828	+	0	NA	Intergenic	LTR12C|LTR|ERV1	-11967	NM_207116	54476	Hs.487458	NM_019011	ENSG00000011275	RNF216	CAHH|TRIAD3|U7I1|UBCE7IP1|ZIN	ring finger protein 216	protein-coding
6239	chr21	31193237	31194236	+	0	NA	intron (NM_001330994, intron 1 of 17)	Tigger2b_Pri|DNA|TcMar-Tigger	73242	NR_027021	642976	Hs.473554	NR_027021		GRIK1-AS1	C21orf9|GRIK1-AS|GRIK1AS|NCRNA00110	GRIK1 antisense RNA 1	ncRNA	GRIK1-AS1	-	-	GRIK1-AS1	GRIK1-AS1	TSS26016	chr21:30909253-31312282	-	-	0	0	0	OK	0	0	0	OK	0	0	0	OK	0	0	0	OK	0.0225615	0	0.150085	OK	0	0
1671	chr6	34202176	34204166	+	0	NA	Intergenic	CpG	-1406	NM_001319079	3159	Hs.518805	NM_002131	ENSG00000137309	HMGA1	HMG-R|HMGA1A|HMGIY	high mobility group AT-hook 1	protein-coding
4242	chr4	8516580	8517579	+	0	NA	Intergenic	L2b|LINE|L2	-64885	NR_045511	27201	Hs.740355	NM_080819	ENSG00000155269	GPR78	-	G protein-coupled receptor 78	protein-coding
830	chr20	62065842	62066841	+	0	NA	intron (NM_172107, intron 7 of 16)	L1MB5|LINE|L1	37689	NM_004518	3785	Hs.161851	NM_004518	ENSG00000075043	KCNQ2	BFNC|EBN|EBN1|ENB1|HNSPC|KCNA11|KV7.2	potassium voltage-gated channel subfamily Q member 2	protein-coding	KCNQ2	-	-	KCNQ2	KCNQ2	TSS28696	chr20:62037541-62103993	-	-	0	0	0	OK	0.0222303	0	0.165048	OK	0	0	0	OK	0	0	0	OK	0	0	0	OK	0	0
4933	chr3	40120579	40121578	+	0	NA	intron (NM_001284425, intron 3 of 15)	intron (NM_001284425, intron 3 of 15)	-20424	NM_001284426	25924	Hs.594535	NM_015460	ENSG00000170011	MYRIP	SLAC2-C|SLAC2C	myosin VIIA and Rab interacting protein	protein-coding
3721	chr16	74919754	74920753	+	0	NA	exon (NM_030581, exon 24 of 26)	exon (NM_030581, exon 24 of 26)	98764	NM_030581	79726	Hs.280951	NM_030581	ENSG00000103091	WDR59	CDW12|FP977|p90-120	WD repeat domain 59	protein-coding	WDR59	-	-	WDR59	WDR59	TSS22790	chr16:74907470-75019017	-	-	4.39662	3.36615	5.42708	OK	5.40175	4.19107	6.61242	OK	4.39996	3.38628	5.41364	OK	5.25576	4.08099	6.43052	OK	4.69599	3.61754	5.77445	OK	6.21743	4.87283
2893	chr2	32235611	32236610	+	0	NA	promoter-TSS (NR_126034)	promoter-TSS (NR_126034)	11	NR_126034	51072	Hs.444969	NM_015955	ENSG00000162959	MEMO1	C2orf4|CGI-27|MEMO|NS5ATP7	mediator of cell motility 1	protein-coding
2062	chr17	17827015	17828014	+	0	NA	intron (NM_001288789, intron 1 of 12)	L1MB8|LINE|L1	48270	NM_001082968	146691	Hs.462379	NM_144678	ENSG00000175662	TOM1L2	-	target of myb1 like 2 membrane trafficking protein	protein-coding
5204	chr11	130202601	130203600	+	0	NA	Intergenic	AluSx1|SINE|Alu	-18493	NM_001301098	29068	Hs.721470	NM_014155	ENSG00000196323	ZBTB44	BTBD15|HSPC063|ZNF851	zinc finger and BTB domain containing 44	protein-coding
3935	chr9	17154175	17155174	+	0	NA	intron (NM_017738, intron 2 of 25)	LTR12_|LTR|ERV1	19685	NM_001114395	54875	Hs.435381	NM_017738	ENSG00000044459	CNTLN	C9orf101|C9orf39|bA340N12.1	centlein	protein-coding
1101	chr3	8893098	8894097	+	0	NA	Intergenic	Intergenic	-82297	NM_000916	5021	Hs.2820	NM_000916	ENSG00000180914	OXTR	OT-R	oxytocin receptor	protein-coding	OXTR	-	-	OXTR	OXTR	TSS21564	chr3:8792094-8811300	-	-	111.823	93.8098	129.836	OK	35.2211	29.204	41.2382	OK	59.3631	49.4512	69.275	OK	6.25515	4.90614	7.60416	OK	99.9769	83.5956	116.358	OK	5.82701	4.56587
326	chr8	145158233	145159232	+	0	NA	promoter-TSS (NM_032272)	promoter-TSS (NM_032272)	406	NR_038270	81858	Hs.529755	NM_030974	ENSG00000179526	SHARPIN	SIPL1	SHANK associated RH domain interactor	protein-coding
6471	chr12	52207692	52208691	+	0	NA	Intergenic	CpG	17510	NM_001013690	401720	Hs.648218	NM_001013690		FIGNL2	-	fidgetin like 2	protein-coding	FIGNL2	-	-	FIGNL2	FIGNL2	TSS1566	chr12:52211675-52225701	-	-	0	0	0	OK	0.0064269	0	0.0372404	OK	0.00658405	0	0.037068	OK	0	0	0	OK	0	0	0	OK	0	0
1165	chr8	49087761	49088760	+	0	NA	Intergenic	Intergenic	167265	NM_003350	7336	Hs.491695	NM_003350	ENSG00000169139	UBE2V2	DDVIT1|DDVit-1|EDAF-1|EDPF-1|EDPF1|MMS2|UEV-2|UEV2	ubiquitin conjugating enzyme E2 V2	protein-coding	UBE2V2	-	-	UBE2V2	UBE2V2	TSS27596	chr8:48920994-48974454	-	-	110.11	91.4496	128.77	OK	98.4691	81.5922	115.346	OK	124.017	103.022	145.012	OK	127.714	106.289	149.139	OK	123.538	102.798	144.278	OK	94.9223	78.7058
2886	chr10	48335716	48336715	+	0	NA	Intergenic	Intergenic	-4018	NR_134500	107001062	Hs.576719	NR_134500		LOC107001062	-	uncharacterized LOC107001062	ncRNA
2543	chr15	67664214	67665213	+	0	NA	exon (NM_001284349, exon 6 of 7)	exon (NM_001284349, exon 6 of 7)	-117177	NM_001271885	79719	Hs.254642	NM_024666	ENSG00000103591	AAGAB	KPPP1|PPKP1|PPKP1A|p34	alpha- and gamma-adaptin binding protein	protein-coding
5650	chr7	127807412	127808411	+	0	NA	Intergenic	CpG	-40014	NR_029596	406917		NR_029596	ENSG00000207705	MIR129-1	MIR-129b|MIRN129-1|mir-129-1	microRNA 129-1	ncRNA	MIR129-1	-	-	MIR129-1	MIR129-1	TSS5201	chr7:127847924-127847996	-	-	0	0	0	OK	0	0	0	OK	0	0	0	OK	0	0	0	OK	0	0	0	OK	0	0
5224	chrX	13615817	13616816	+	0	NA	intron (NM_015507, intron 3 of 11)	intron (NM_015507, intron 3 of 11)	7905	NR_106734	102466519		NR_106734	ENSG00000283493	MIR6086	hsa-mir-6086	microRNA 6086	ncRNA	MIR6086	-	-	MIR6086	MIR6086	TSS31844	chrX:13587693-13651694	-	-	0	0	0	OK	0	0	0	OK	0	0	0	OK	0	0	0	OK	0	0	0	OK	0	0
5129	chr1	116142783	116143782	+	0	NA	Intergenic	AluJb|SINE|Alu	-41292	NM_001172411	81839	Hs.515130	NM_138959	ENSG00000173218	VANGL1	KITENIN|LPP2|STB2|STBM2	VANGL planar cell polarity protein 1	protein-coding
3940	chr11	4208641	4209640	+	0	NA	intron (NR_047550, intron 1 of 1)	CpG	758	NR_047550	100506082	Hs.445705	NR_047550	ENSG00000254480	LOC100506082	-	uncharacterized LOC100506082	ncRNA	LOC100506082	-	-	LOC100506082	LOC100506082	TSS7941	chr11:4208381-4223883	-	-	0.321616	0	0.99724	OK	0.7792	0	2.06185	OK	0	0	0	OK	0.274333	0	0.704977	OK	0.683812	0	1.79013	OK	0.234936	0
335	chr11	60718038	60719037	+	0	NA	non-coding (NR_027391, exon 1 of 7)	non-coding (NR_027391, exon 1 of 7)	720	NM_016582	51296	Hs.237856	NM_016582	ENSG00000110446	SLC15A3	OCTP|PHT2|PTR3	solute carrier family 15 member 3	protein-coding	SLC15A3	-	-	SLC15A3	SLC15A3	TSS707	chr11:60691912-60719257	-	-	0.803511	0	1.62743	OK	0.95218	0	2.09247	OK	0.64793	0	1.44397	OK	0.913046	0	1.86895	OK	0.673075	0	1.50459	OK	1.37462	0
6660	chr22	42310223	42311222	+	0	NA	promoter-TSS (NM_001207020)	promoter-TSS (NM_001207020)	-51	NM_001207020	440829	Hs.526704	NM_001207020	ENSG00000234965	SHISA8	C22orf17|Orf26	shisa family member 8	protein-coding	SHISA8	-	-	SHISA8	SHISA8	TSS30752	chr22:42305557-42310671	-	-	0	0	0	OK	0	0	0	OK	0	0	0	OK	0	0	0	OK	0.033011	0	0.145047	OK	0	0
3531	chr9	86316405	86317404	+	0	NA	intron (NM_053067, intron 1 of 9)	L1MB8|LINE|L1	-5846	NR_135839	105376114	Hs.9589	NR_135839	ENSG00000254473	LOC105376114	-	uncharacterized LOC105376114	ncRNA
4681	chrX	62684932	62685931	+	0	NA	intron (NR_015353, intron 2 of 3)	L1M4|LINE|L1	95442	NR_015353	92249	Hs.31532	NR_015353	ENSG00000235437	LINC01278	-	long intergenic non-protein coding RNA 1278	ncRNA	LINC01278	-	-	LINC01278	LINC01278	TSS6554	chrX:62646438-62780873	-	-	12.3515	9.88716	14.8158	OK	15.3553	12.3926	18.318	OK	13.2838	10.6673	15.9002	OK	12.4597	9.98334	14.9361	OK	16.5763	13.4188	19.7339	OK	12.5022	10.0222
4287	chr1	22721357	22722356	+	0	NA	Intergenic	Intergenic	-56488	NM_001330398	9923	Hs.418966	NM_014870	ENSG00000184677	ZBTB40	ZNF923	zinc finger and BTB domain containing 40	protein-coding
2791	chr9	132933549	132934548	+	0	NA	promoter-TSS (NM_014286)	promoter-TSS (NM_014286)	-809	NM_014286	23413	Hs.642946	NM_014286	ENSG00000107130	NCS1	FLUP|FREQ	neuronal calcium sensor 1	protein-coding	NCS1	-	-	NCS1	NCS1	TSS33151,TSS9343	chr9:132934856-132999583	-	-	3.96519	3.03696	4.89342	OK	3.67688	2.81681	4.53696	OK	3.92354	3.01861	4.82847	OK	3.57777	2.73377	4.42177	OK	3.85507	2.94958	4.76057	OK	4.32499	3.33793
5362	chr3	146594856	146595855	+	0	NA	Intergenic	Intergenic	-44355	NR_135560	101927866	Hs.586116	NR_135560	ENSG00000242671	LINC02010	-	long intergenic non-protein coding RNA 2010	ncRNA
4481	chr21	28337454	28338453	+	0	NA	exon (NM_007038, exon 1 of 8)	exon (NM_007038, exon 1 of 8)	1486	NM_007038	11096	Hs.58324	NM_007038	ENSG00000154736	ADAMTS5	ADAM-TS 11|ADAM-TS 5|ADAM-TS5|ADAMTS-11|ADAMTS-5|ADAMTS11|ADMP-2	ADAM metallopeptidase with thrombospondin type 1 motif 5	protein-coding	ADAMTS5	-	-	ADAMTS5	ADAMTS5	TSS7449	chr21:28290230-28339439	-	-	10.0069	8.26203	11.7518	OK	6.39791	5.21698	7.57884	OK	5.1	4.12027	6.07972	OK	3.99057	3.20284	4.77829	OK	17.1396	14.2612	20.0179	OK	18.5336	15.434
1867	chr11	118401420	118402419	+	0	NA	promoter-TSS (NR_120574)	promoter-TSS (NR_120574)	-110	NR_120576	101929089	Hs.666633	NR_120572	ENSG00000255435	LOC101929089	-	uncharacterized LOC101929089	ncRNA
4742	chr2	180714545	180715544	+	0	NA	intron (NM_152520, intron 1 of 9)	L3|LINE|CR1	10591	NR_031659	100302172		NR_031659	ENSG00000221240	MIR1258	MIRN1258|hsa-mir-1258|mir-1258	microRNA 1258	ncRNA	MIR1258	-	-	MIR1258	MIR1258	TSS1170	chr2:180306710-180726232	-	-	0	0	0	OK	0	0	0	OK	0	0	0	OK	0	0	0	OK	0	0	0	OK	0	0
3969	chr11	93575082	93576081	+	0	NA	intron (NM_001144871, intron 1 of 3)	intron (NM_001144871, intron 1 of 3)	8087	NM_001144871	387804	Hs.512252	NM_001144871	ENSG00000214376	VSTM5	C11orf90	V-set and transmembrane domain containing 5	protein-coding	VSTM5	-	-	VSTM5	VSTM5	TSS33717	chr11:93553734-93583668	-	-	0	0	0	OK	0.108773	0	0.391074	OK	0	0	0	OK	0	0	0	OK	0.0553415	0	0.297548	OK	0.062405	0
4664	chr1	226736591	226737590	+	0	NA	intron (NM_001003665, intron 1 of 3)	CpG	589	NM_001003665	375057	Hs.116827	NM_001003665	ENSG00000203685	STUM	C1orf95	stum, mechanosensory transduction mediator homolog	protein-coding
2505	chr15	75248439	75249438	+	0	NA	5' UTR (NM_017793, exon 1 of 1)	5' UTR (NM_017793, exon 1 of 1)	837	NM_017793	54913	Hs.8562	NM_017793	ENSG00000178718	RPP25	-	ribonuclease P/MRP subunit p25	protein-coding	RPP25	-	-	RPP25	RPP25	TSS834	chr15:75247442-75249775	-	-	6.40324	4.62809	8.17839	OK	4.44631	3.11706	5.77556	OK	4.34749	3.04247	5.6525	OK	5.01817	3.58257	6.45377	OK	3.18377	2.13524	4.2323	OK	2.3969	1.52292
5756	chr5	56987225	56988224	+	0	NA	Intergenic	LTR16A|LTR|ERVL	41237	NR_104668	101928505	Hs.119998	NR_104668		LOC101928505	-	uncharacterized LOC101928505	ncRNA	LOC101928505	-	-	LOC101928505	LOC101928505	TSS19913	chr5:56946486-56966816	-	-	0	0	0	OK	0.0416045	0	0.124711	OK	0	0	0	OK	0	0	0	OK	0	0	0	OK	0.073475	0
4856	chr7	112081229	112082228	+	0	NA	intron (NM_001197080, intron 1 of 11)	intron (NM_001197080, intron 1 of 11)	-8755	NM_001550	3475	Hs.7879	NM_001550	ENSG00000006652	IFRD1	PC4|TIS7	interferon related developmental regulator 1	protein-coding	IFRD1	-	-	IFRD1	IFRD1	TSS10899,TSS21954,TSS7049,TSS8791	chr7:112063198-112117258	-	-	35.4522	29.3289	41.5755	OK	38.0583	31.4129	44.7037	OK	28.3283	23.2724	33.3843	OK	28.1989	23.2242	33.1736	OK	47.2949	39.3226	55.2673	OK	53.6937	44.6936
3533	chrX	11118450	11119449	+	0	NA	Intergenic	Intergenic	-10457	NM_001122608	3052	Hs.211571	NM_005333	ENSG00000004961	HCCS	CCHL|LSDMCA1|MCOPS7|MLS	holocytochrome c synthase	protein-coding
2936	chr11	74115224	74116223	+	0	NA	Intergenic	L1MB8|LINE|L1	5441	NR_039710	100616215		NR_039710	ENSG00000264402	MIR548AL	-	microRNA 548al	ncRNA	MIR548AL	-	-	MIR548AL	MIR548AL	TSS14982	chr12:86373036-87232681	-	-	0	0	0	OK	0	0	0	OK	0	0	0	OK	0	0	0	OK	0	0	0	OK	0	0
440	chr12	24715691	24716690	+	0	NA	promoter-TSS (NM_152989)	promoter-TSS (NM_152989)	-666	NM_001261414	6660	Hs.434948	NM_006940	ENSG00000134532	SOX5	L-SOX5|L-SOX5B|L-SOX5F|LAMSHF	SRY-box 5	protein-coding
1289	chr12	132518750	132519749	+	0	NA	intron (NM_015409, intron 30 of 52)	intron (NM_015409, intron 30 of 52)	3480	NR_002979	677829	Hs.742405	NR_002979	ENSG00000208892	SNORA49	ACA49	small nucleolar RNA, H/ACA box 49	snoRNA	SNORA49	-	-	SNORA49	SNORA49	TSS530	chr12:132434464-132565011	-	-	0	0	0	OK	0	0	0	OK	0	0	0	OK	0	0	0	OK	0	0	0	OK	0	0
2525	chr5	60705061	60706060	+	0	NA	intron (NM_020928, intron 1 of 13)	intron (NM_020928, intron 1 of 13)	77460	NM_020928	57688	Hs.744939	NM_020928	ENSG00000130449	ZSWIM6	AFND	zinc finger SWIM-type containing 6	protein-coding	ZSWIM6	-	-	ZSWIM6	ZSWIM6	TSS27089	chr5:60628099-60841999	-	-	0.610503	0.391789	0.829218	OK	0.619906	0.39988	0.839932	OK	0.532067	0.333347	0.730786	OK	0.531234	0.333546	0.728921	OK	0.605633	0.389697	0.821568	OK	0.782514	0.528252
6113	chr1	36803666	36804665	+	0	NA	Intergenic	Intergenic	-14410	NM_018166	55194	Hs.87016	NM_018166	ENSG00000142694	EVA1B	C1orf78|FAM176B	eva-1 homolog B	protein-coding	EVA1B	-	-	EVA1B	EVA1B	TSS27102,TSS6909	chr1:36787630-36789755	-	-	18.6122	13.4282	23.7962	OK	24.753	18.5828	30.9231	OK	24.8887	18.774	31.0033	OK	30.6894	23.4094	37.9694	OK	24.1671	18.0641	30.2702	OK	40.2826	31.1639
841	chr12	69165045	69166044	+	0	NA	Intergenic	MIR3|SINE|MIR	25608	NM_018656	55508	Hs.506011	NM_018656	ENSG00000175782	SLC35E3	BLOV1	solute carrier family 35 member E3	protein-coding	SLC35E3	-	-	SLC35E3	SLC35E3	TSS225	chr12:69139935-69159853	-	-	8.41595	6.53321	10.2987	OK	9.92282	7.76594	12.0797	OK	7.85481	6.05455	9.65508	OK	8.20929	6.35745	10.0611	OK	9.10624	7.09767	11.1148	OK	8.01589	6.20107
1898	chr3	126720602	126721601	+	0	NA	intron (NM_032242, intron 2 of 30)	intron (NM_032242, intron 2 of 30)	13664	NM_032242	5361	Hs.432329	NM_032242	ENSG00000114554	PLXNA1	NOV|NOVP|PLEXIN-A1|PLXN1	plexin A1	protein-coding	PLXNA1	-	-	PLXNA1	PLXNA1	TSS23941	chr3:126707436-126756235	-	-	3.0743	2.4172	3.7314	OK	3.16549	2.50591	3.82507	OK	3.45164	2.74901	4.15427	OK	3.64166	2.89953	4.38379	OK	3.82925	3.0531	4.60541	OK	5.50122	4.44834
4668	chr2	38968085	38969084	+	0	NA	Intergenic	AluJb|SINE|Alu	10052	NM_001031684	6432	Hs.309090	NM_006276	ENSG00000115875	SRSF7	9G8|AAG3|SFRS7	serine and arginine rich splicing factor 7	protein-coding
1044	chr11	46721899	46722898	+	0	NA	promoter-TSS (NM_024741)	promoter-TSS (NM_024741)	81	NM_024741	79797	Hs.656931	NM_024741	ENSG00000175213	ZNF408	EVR6|RP72	zinc finger protein 408	protein-coding	ZNF408	-	-	ZNF408	ZNF408	TSS11794,TSS25215	chr11:46722316-46727466	-	-	10.9105	8.45419	13.3668	OK	11.9007	9.31765	14.4837	OK	10.1579	7.93553	12.3803	OK	12.0541	9.47909	14.6292	OK	14.2005	11.2358	17.1651	OK	19.2707	15.4478
3513	chr6	7349467	7350466	+	0	NA	intron (NM_001170693, intron 10 of 12)	AluSq2|SINE|Alu	-36419	NM_003144	6745	Hs.114033	NM_003144	ENSG00000124783	SSR1	TRAPA	signal sequence receptor subunit 1	protein-coding	SSR1	-	-	SSR1	SSR1	TSS14148	chr6:7281375-7313547	-	-	56.3653	47.3461	65.3845	OK	47.3728	39.7769	54.9687	OK	73.7219	61.9809	85.4629	OK	55.3151	46.4611	64.169	OK	49.2665	41.3741	57.1589	OK	47.7217	40.0827
5737	chrX	61717424	61718423	+	0	NA	Intergenic	ALR/Alpha|Satellite|centr	853295	NM_001012968	139886	Hs.612782	NM_001012968	ENSG00000186767	SPIN4	TDRD28	spindlin family member 4	protein-coding	SPIN4	-	-	SPIN4	SPIN4	TSS14932	chrX:62567106-62571218	-	-	13.8462	11.2591	16.4334	OK	7.93076	6.29401	9.56751	OK	17.2076	14.0049	20.4102	OK	11.2545	9.06972	13.4393	OK	6.99606	5.53552	8.45659	OK	1.8499	1.32636
5548	chr4	4857973	4858972	+	0	NA	Intergenic	CpG	-2920	NM_002448	4487	Hs.424414	NM_002448	ENSG00000163132	MSX1	ECTD3|HOX7|HYD1|STHAG1	msh homeobox 1	protein-coding	MSX1	-	-	MSX1	MSX1	TSS32228	chr4:4861391-4865660	-	-	1.89877	1.07964	2.7179	OK	2.63598	1.67081	3.60115	OK	0.52932	0.164837	0.893803	OK	0.938045	0.435249	1.44084	OK	3.90489	2.62833	5.18144	OK	2.51208	1.56493
1751	chr9	96928397	96929396	+	0	NA	Intergenic	CpG	-9343	NR_029476	406881		NR_029476	ENSG00000199165	MIRLET7A1	LET7A1|MIRNLET7A1|let-7a-1	microRNA let-7a-1	ncRNA	MIRLET7A1	-	-	MIRLET7A1	MIRLET7A1	TSS5423	chr9:96938238-96938318	-	-	0	0	0	OK	0	0	0	OK	0	0	0	OK	0	0	0	OK	0	0	0	OK	0	0
4029	chr19	39420557	39421556	+	0	NA	promoter-TSS (NM_021107)	promoter-TSS (NM_021107)	-292	NM_033362	6183	Hs.411125	NM_021107	ENSG00000128626	MRPS12	MPR-S12|MT-RPS12|RPMS12|RPS12|RPSM12	mitochondrial ribosomal protein S12	protein-coding
91	chr12	53318626	53319625	+	0	NA	intron (NM_001256293, intron 1 of 8)	intron (NM_001256293, intron 1 of 8)	1128	NM_001256282	3856	Hs.533782	NM_002273	ENSG00000170421	KRT8	CARD2|CK-8|CK8|CYK8|K2C8|K8|KO	keratin 8	protein-coding
2137	chr14	105451877	105452876	+	0	NA	promoter-TSS (NM_174891)	promoter-TSS (NM_174891)	-240	NM_174891	122616	Hs.27183	NM_174891	ENSG00000140104	C14orf79	-	chromosome 14 open reading frame 79	protein-coding	C14orf79	-	-	C14orf79	C14orf79	TSS3721	chr14:105452615-105461855	-	-	5.32229	3.90061	6.74396	OK	4.41186	3.18316	5.64056	OK	6.04761	4.51527	7.57995	OK	4.4839	3.24283	5.72497	OK	3.25331	2.2707	4.23591	OK	5.66612	4.18846
4116	chr6	121780418	121781417	+	0	NA	Intergenic	L2c|LINE|L2	24194	NM_000165	2697	Hs.74471	NM_000165	ENSG00000152661	GJA1	AVSD3|CMDR|CX43|EKVP|GJAL|HLHS1|HSS|ODDD|PPKCA	gap junction protein alpha 1	protein-coding	GJA1	-	-	GJA1	GJA1	TSS29282	chr6:121756722-121770890	-	-	78.8583	65.4806	92.2361	OK	65.2191	54.327	76.1112	OK	60.6532	50.4592	70.8471	OK	72.9936	60.9185	85.0687	OK	105.931	88.6306	123.232	OK	93.1185	77.9285
467	chr11	66461877	66462876	+	0	NA	intron (NM_006946, intron 20 of 36)	intron (NM_006946, intron 20 of 36)	-16984	NM_001286135	83759	Hs.618713	NM_031492	ENSG00000173914	RBM4B	RBM30|RBM4L|ZCCHC15|ZCCHC21B|ZCRB3B	RNA binding motif protein 4B	protein-coding
2121	chr12	44286640	44287639	+	0	NA	intron (NM_001286213, intron 2 of 6)	L2a|LINE|L2	57475	NM_001286213	84216	Hs.444668	NM_032256	ENSG00000139173	TMEM117	-	transmembrane protein 117	protein-coding
474	chr1	109791492	109793161	+	0	NA	promoter-TSS (NM_001408)	promoter-TSS (NM_001408)	-315	NM_001408	1952	Hs.57652	NM_001408	ENSG00000143126	CELSR2	ADGRC2|CDHF10|EGFL2|Flamingo1|MEGF3	cadherin EGF LAG seven-pass G-type receptor 2	protein-coding	CELSR2	-	-	CELSR2	CELSR2	TSS31750	chr1:109792640-109818378	-	-	0.0627467	0.0169375	0.108556	OK	0.144555	0.0756919	0.213419	OK	0.0533964	0.0156824	0.0911104	OK	0.103798	0.0467093	0.160886	OK	0.121347	0.0576588	0.185036	OK	0.206927	0.118287
3563	chr5	53655632	53656631	+	0	NA	intron (NR_126379, intron 1 of 4)	intron (NR_126379, intron 1 of 4)	39357	NR_126379	104355136	Hs.559024	NR_126379	ENSG00000249069	LINC01033	-	long intergenic non-protein coding RNA 1033	ncRNA	LINC01033	-	-	LINC01033	LINC01033	TSS19378	chr5:53616773-53710955	-	-	0	0	0	OK	0	0	0	OK	0	0	0	OK	0	0	0	OK	0	0	0	OK	0	0
6024	chr1	121132654	121133653	+	0	NA	3' UTR (NM_001330684, exon 6 of 6)	3' UTR (NM_001330684, exon 6 of 6)	6612	NR_104189	100873165	Hs.568525	NR_104189	ENSG00000230806	SRGAP2-AS1	-	SRGAP2 antisense RNA 1	ncRNA	SRGAP2-AS1	-	-	SRGAP2-AS1	SRGAP2-AS1	TSS18685	chr1:121102016-121139765	-	-	0	0	0	OK	0	0	0	OK	0	0	0	OK	0	0	0	OK	0	0	0	OK	0	0
563	chr8	145514920	145515919	+	0	NA	promoter-TSS (NM_015201)	promoter-TSS (NM_015201)	168	NM_005526	3297	Hs.530227	NM_005526	ENSG00000185122	HSF1	HSTF1	heat shock transcription factor 1	protein-coding	HSF1	-	-	HSF1	HSF1	TSS10667	chr8:145515269-145550582	-	-	23.1002	17.7074	28.4931	OK	27.049	20.2599	33.8381	OK	26.7903	20.6027	32.9779	OK	34.6722	26.674	42.6704	OK	34.4117	27.1727	41.6506	OK	40.1111	31.5001
3248	chrX	8975277	8976276	+	0	NA	Intergenic	L1MA2|LINE|L1	26392	NM_205849	171483	Hs.733351	NM_173696	ENSG00000177138	FAM9B	TEX39B	family with sequence similarity 9 member B	protein-coding
2919	chr11	61734269	61735268	+	0	NA	intron (NM_002032, intron 1 of 3)	CpG	364	NM_002032	2495	Hs.524910	NM_002032	ENSG00000167996	FTH1	FHC|FTH|FTHL6|HFE5|PIG15|PLIF	ferritin heavy chain 1	protein-coding	FTH1	-	-	FTH1	FTH1	TSS15377	chr11:61717355-61735132	-	-	1070.42	900.967	1239.87	OK	1761.91	1482.35	2041.48	OK	1598.55	1344.91	1852.19	OK	1280.9	1076.88	1484.92	OK	738.027	620.763	855.292	OK	971.417	817.452
4058	chr14	80055928	80056927	+	0	NA	intron (NM_001105250, intron 2 of 6)	intron (NM_001105250, intron 2 of 6)	310745	NR_073546	9369	Hs.368307	NM_004796	ENSG00000021645	NRXN3	C14orf60	neurexin 3	protein-coding
2953	chr19	46284499	46285498	+	0	NA	intron (NM_001288764, intron 1 of 15)	intron (NM_001288764, intron 1 of 15)	817	NM_001081560	1760	Hs.631596	NM_004409	ENSG00000104936	DMPK	DM|DM1|DM1PK|DMK|MDPK|MT-PK	dystrophia myotonica protein kinase	protein-coding
6085	chr11	65334096	65335095	+	0	NA	Intergenic	LTR40b|LTR|ERVL	3289	NR_038923	254100	Hs.595927	NR_038923		SSSCA1-AS1	-	SSSCA1 antisense RNA 1 (head to head)	ncRNA	SSSCA1-AS1	-	-	SSSCA1-AS1	SSSCA1-AS1	TSS31696	chr11:65336690-65337884	-	-	0.275446	0	0.627985	OK	0.701974	0.171353	1.23259	OK	0.684016	0.17755	1.19048	OK	0.902634	0.310088	1.49518	OK	0.321033	0	0.68267	OK	0.858056	0.278915
6715	chr6	107049237	107050236	+	0	NA	intron (NM_001318746, intron 5 of 8)	AluSz|SINE|Alu	27637	NM_032730	84816	Hs.155839	NM_032730	ENSG00000130347	RTN4IP1	NIMP|OPA10	reticulon 4 interacting protein 1	protein-coding	RTN4IP1	-	-	RTN4IP1	RTN4IP1	TSS2101	chr6:107018902-107077373	-	-	3.86041	2.85899	4.86183	OK	4.49307	3.36006	5.62607	OK	4.71673	3.5182	5.91526	OK	6.27229	4.81049	7.7341	OK	3.91446	2.8992	4.92972	OK	3.40751	2.49154
3489	chr9	127048040	127049039	+	0	NA	intron (NM_001166168, intron 1 of 9)	intron (NM_001166168, intron 1 of 9)	-5711	NM_001166170	10783	Hs.197071	NM_014397	ENSG00000119408	NEK6	SID6-1512	NIMA related kinase 6	protein-coding
68	chr17	19551789	19552788	+	0	NA	exon (NM_000382, exon 1 of 10)	exon (NM_000382, exon 1 of 10)	224	NM_001031806	224	Hs.499886	NM_000382	ENSG00000072210	ALDH3A2	ALDH10|FALDH|SLS	aldehyde dehydrogenase 3 family member A2	protein-coding
5488	chr7	103478603	103479602	+	0	NA	intron (NM_173054, intron 2 of 63)	intron (NM_173054, intron 2 of 63)	150861	NM_005045	5649	Hs.655654	NM_005045	ENSG00000189056	RELN	ETL7|LIS2|PRO1598|RL	reelin	protein-coding	RELN	-	-	RELN	RELN	TSS33317	chr7:102987970-103629963	-	-	1.26937	0.472102	2.06664	OK	0.465787	0	0.94758	OK	1.26185	0.460294	2.0634	OK	0.601594	0.00928857	1.1939	OK	0.950247	0.246297	1.6542	OK	1.02049	0.333618
4106	chrX	9431502	9432501	+	0	NA	intron (NM_001139466, intron 1 of 17)	intron (NM_001139466, intron 1 of 17)	666	NM_001139467	6907	Hs.495656	NM_005647	ENSG00000101849	TBL1X	EBI|SMAP55|TBL1	transducin beta like 1X-linked	protein-coding
6069	chr1	78147900	78148899	+	0	NA	promoter-TSS (NM_015534)	promoter-TSS (NM_015534)	-56	NM_015534	26009	Hs.480506	NM_015534	ENSG00000036549	ZZZ3	ATAC1	zinc finger ZZ-type containing 3	protein-coding	ZZZ3	-	-	ZZZ3	ZZZ3	TSS15700,TSS3448	chr1:78028100-78149112	-	-	14.5049	11.9759	17.0338	OK	13.6707	11.2658	16.0757	OK	15.4737	12.7533	18.1942	OK	11.5583	9.47205	13.6446	OK	13.3552	11.0007	15.7097	OK	9.4819	7.748
5338	chr17	73775183	73776182	+	0	NA	intron (NM_005324, intron 1 of 3)	CpG-11127	334	NM_005324	3021	Hs.180877	NM_005324	ENSG00000132475	H3F3B	H3.3B	H3 histone family member 3B	protein-coding	H3F3B	-	-	H3F3B	H3F3B	TSS25670	chr17:73772514-73776016	-	-	194.381	163.328	225.433	OK	201.213	169.037	233.389	OK	234.833	197.4	272.267	OK	279.55	235.14	323.96	OK	205.665	172.834	238.497	OK	219.386	184.404
2514	chr1	9118208	9119207	+	0	NA	intron (NM_001135585, intron 1 of 4)	intron (NM_001135585, intron 1 of 4)	11180	NM_001328620	6518	Hs.530003	NM_003039	ENSG00000142583	SLC2A5	GLUT-5|GLUT5	solute carrier family 2 member 5	protein-coding
5081	chr17	62492709	62493708	+	0	NA	promoter-TSS (NM_007215)	promoter-TSS (NM_007215)	-24	NM_007215	11232	Hs.437009	NM_007215	ENSG00000256525	POLG2	HP55|MTPOLB|PEOA4|POLB|POLG-BETA|POLGB	DNA polymerase gamma 2, accessory subunit	protein-coding	POLG2	-	-	POLG2	POLG2	TSS13256	chr17:62473901-62493184	-	-	4.25965	2.96093	5.55837	OK	5.06999	3.588	6.55198	OK	4.9429	3.48829	6.39751	OK	6.8525	5.02295	8.68206	OK	4.21573	2.92773	5.50374	OK	5.4674	3.90133
5934	chrX	73209148	73210147	+	0	NA	intron (NR_024582, intron 2 of 4)	AluSq|SINE|Alu	45488	NR_024582	554203	Hs.648316	NR_024582	ENSG00000225470	JPX	DCBALD06|ENOX|LINC00183|NCRNA00183	JPX transcript, XIST activator (non-protein coding)	ncRNA	JPX	-	-	JPX	JPX	TSS20027	chrX:73164158-73513409	-	-	2.99668	1.95911	4.03424	OK	3.28928	2.22301	4.35555	OK	2.6458	1.68032	3.61128	OK	3.25706	2.15052	4.3636	OK	2.89885	1.91027	3.88743	OK	3.00015	1.93616
4176	chr14	35843257	35844256	+	0	NA	Intergenic	Intergenic	30204	NM_020529	4792	Hs.81328	NM_020529	ENSG00000100906	NFKBIA	IKBA|MAD-3|NFKBI	NFKB inhibitor alpha	protein-coding	NFKBIA	-	-	NFKBIA	NFKBIA	TSS9808	chr14:35870715-35873960	-	-	54.4563	44.6172	64.2953	OK	57.6908	47.3704	68.0112	OK	49.584	40.6199	58.548	OK	42.0488	34.2403	49.8574	OK	50.4735	41.3097	59.6372	OK	63.0535	51.8852
3628	chr13	73355259	73356258	+	0	NA	promoter-TSS (NM_006346)	promoter-TSS (NM_006346)	-472	NM_006346	10464	Hs.441926	NM_006346	ENSG00000083535	PIBF1	C13orf24|CEP90|PIBF	progesterone immunomodulatory binding factor 1	protein-coding	PIBF1	-	-	PIBF1	PIBF1	TSS26997	chr13:73282494-73590591	-	-	6.90235	3.29735	10.5073	OK	5.57093	2.84695	8.2949	OK	11.559	6.53304	16.5849	OK	8.83838	4.93107	12.7457	OK	3.69935	1.14662	6.25207	OK	4.4436	2.37587
5961	chr20	49431897	49432896	+	0	NA	intron (NM_001010974, intron 1 of 3)	intron (NM_001010974, intron 1 of 3)	20965	NM_001010974	55653	Hs.381178	NM_017843	ENSG00000124243	BCAS4	CNOL	breast carcinoma amplified sequence 4	protein-coding
3807	chr13	93818731	93819730	+	0	NA	Intergenic	L2|LINE|L2	-59831	NM_005708	10082	Hs.444329	NM_005708	ENSG00000183098	GPC6	OMIMD1	glypican 6	protein-coding	GPC6	-	-	GPC6	GPC6	TSS15076	chr13:93879077-95060273	-	-	4.47463	3.57017	5.37909	OK	4.60734	3.67473	5.53994	OK	7.02073	5.68158	8.35988	OK	5.84181	4.70568	6.97793	OK	0.632392	0.430254	0.834531	OK	1.18745	0.870769
6322	chr6	11758653	11759652	+	0	NA	intron (NM_032744, intron 3 of 5)	intron (NM_032744, intron 3 of 5)	20128	NM_001143948	84830	Hs.126409	NM_032744	ENSG00000111863	ADTRP	AIG1L|C6orf105|dJ413H6.1	androgen dependent TFPI regulating protein	protein-coding
3995	chr18	24186704	24187703	+	0	NA	intron (NM_001258222, intron 1 of 4)	AluJr4|SINE|Alu	-15704	NR_107024	102466874		NR_107024	ENSG00000276221	MIR8057	hsa-mir-8057	microRNA 8057	ncRNA	MIR8057	-	-	MIR8057	MIR8057	TSS30480	chr18:24034873-24237365	-	-	0	0	0	OK	0	0	0	OK	0	0	0	OK	0	0	0	OK	0	0	0	OK	0	0
222	chr1	8020836	8021835	+	0	NA	promoter-TSS (NM_001123377)	promoter-TSS (NM_001123377)	-379	NM_007262	11315	Hs.419640	NM_007262	ENSG00000116288	PARK7	DJ-1|DJ1|HEL-S-67p	Parkinsonism associated deglycase	protein-coding	PARK7	-	-	PARK7	PARK7	TSS21327	chr1:8021713-8045342	-	-	327.424	273.186	381.661	OK	357.768	298.408	417.127	OK	344.257	287.304	401.211	OK	431.757	360.89	502.623	OK	354.859	296.334	413.384	OK	401.186	335.203
5632	chr1	148877743	148878742	+	0	NA	intron (NR_136328, intron 2 of 9)	AluSx|SINE|Alu	2202	NR_136328	101927429	Hs.568236	NR_136328		LOC101927429	-	lysine methyltransferase 2C pseudogene	pseudo
2911	chr18	11176077	11177076	+	0	NA	Intergenic	Intergenic	-27815	NM_022068	63895	Hs.436902	NM_022068	ENSG00000154864	PIEZO2	C18orf30|C18orf58|DA3|DA5|DAIPT|FAM38B|FAM38B2|HsT748|HsT771|MWKS	piezo type mechanosensitive ion channel component 2	protein-coding	PIEZO2	-	-	PIEZO2	PIEZO2	TSS18974	chr18:10670243-11148761	-	-	1.0626	0.793508	1.3317	OK	1.35072	1.02453	1.67691	OK	1.34752	1.02174	1.6733	OK	2.45276	1.93003	2.97549	OK	2.07444	1.61989	2.529	OK	2.38752	1.87978
2418	chr3	54925329	54926328	+	0	NA	intron (NM_018398, intron 25 of 37)	intron (NM_018398, intron 25 of 37)	9454	NR_046666	100874237	Hs.570583	NR_046666	ENSG00000243715	CACNA2D3-AS1	-	CACNA2D3 antisense RNA 1	ncRNA	CACNA2D3-AS1	-	-	CACNA2D3-AS1	CACNA2D3-AS1	TSS29975	chr3:54156692-55108584	-	-	2.72e-07	0	0.062677	OK	0.0100976	0	0.0726222	OK	0.0109814	0	0.0732364	OK	0.0193105	0	0.107402	OK	0	0	0	OK	0	0
3132	chr17	17203793	17204792	+	0	NA	Intergenic	MER52D|LTR|ERV1	-2388	NM_020201	56953	Hs.513977	NM_020201	ENSG00000205309	NT5M	dNT-2|dNT2|mdN	5',3'-nucleotidase, mitochondrial	protein-coding	NT5M	-	-	NT5M	NT5M	TSS18078	chr17:17206679-17250977	-	-	1.4858	0.779886	2.19171	OK	1.05133	0.495114	1.60754	OK	0.395548	0.0913407	0.699754	OK	0.698806	0.27608	1.12153	OK	0.54181	0.163836	0.919785	OK	0.399738	0.0835466
305	chr12	123634851	123635850	+	0	NA	Intergenic	CpG	-40314	NM_001300801	57605	Hs.272759	NM_020845	ENSG00000090975	PITPNM2	NIR-3|NIR3|RDGB2|RDGBA2	phosphatidylinositol transfer protein membrane associated 2	protein-coding
928	chr6	147235564	147236563	+	0	NA	intron (NR_034115, intron 7 of 10)	intron (NR_034115, intron 7 of 10)	-111103	NR_003954	729176	Hs.486708	NR_003954		KATNBL1P6	-	katanin regulatory subunit B1 like 1 pseudogene 6	pseudo	KATNBL1P6	-	-	KATNBL1P6	KATNBL1P6	TSS30434	chr6:146920135-147136597	-	-	2.38009	1.63456	3.12562	OK	2.04313	1.34744	2.73881	OK	3.01862	2.08913	3.94812	OK	3.02835	2.11974	3.93695	OK	2.84433	1.98304	3.70563	OK	1.73885	1.12601
1644	chr6	17394115	17395114	+	0	NA	intron (NM_006366, intron 1 of 12)	intron (NM_006366, intron 1 of 12)	878	NM_006366	10486	Hs.132902	NM_006366	ENSG00000112186	CAP2	-	CAP, adenylate cyclase-associated protein, 2 (yeast)	protein-coding	CAP2	-	-	CAP2	CAP2	TSS24072	chr6:17393735-17558023	-	-	32.5668	26.8424	38.2911	OK	34.9658	28.8592	41.0724	OK	13.5793	10.8866	16.272	OK	20.926	17.0564	24.7956	OK	65.2901	54.3975	76.1827	OK	39.8883	33.0123
6506	chr14	104178090	104179089	+	0	NA	intron (NM_001100118, intron 1 of 8)	intron (NM_001100118, intron 1 of 8)	3234	NM_001100118	7517	Hs.592325	NM_005432	ENSG00000126215	XRCC3	CMM6	X-ray repair cross complementing 3	protein-coding
1526	chr13	111521945	111522944	+	0	NA	non-coding (NR_027701, exon 1 of 1)	non-coding (NR_027701, exon 1 of 1)	211	NR_027701	283487	Hs.245390	NM_178514	ENSG00000255874	LINC00346	C13orf29|NCRNA00346	long intergenic non-protein coding RNA 346	ncRNA
4560	chr10	70683500	70684499	+	0	NA	intron (NM_024045, intron 8 of 14)	AluSz|SINE|Alu	22965	NM_024045	79009	Hs.522984	NM_024045	ENSG00000107625	DDX50	GU2|GUB|RH-II/GuB|mcdrh	DExD-box helicase 50	protein-coding	DDX50	-	-	DDX50	DDX50	TSS19522	chr10:70661033-70706603	-	-	24.6572	20.0799	29.2345	OK	22.6335	18.3889	26.8781	OK	30.9717	25.3612	36.5822	OK	29.6613	24.2805	35.0421	OK	22.7561	18.497	27.0152	OK	25.0737	20.4455
4276	chr22	46997330	46998329	+	0	NA	Intergenic	Intergenic	-18470	NM_015124	23151	Hs.475150	NM_015124	ENSG00000075240	GRAMD4	DIP|dA59H18.1|dJ439F8.1	GRAM domain containing 4	protein-coding	GRAMD4	-	-	GRAMD4	GRAMD4	TSS1784	chr22:47022657-47075688	-	-	1.55174	1.06247	2.04101	OK	1.88129	1.32601	2.43657	OK	1.11943	0.742745	1.49612	OK	1.13834	0.751548	1.52514	OK	1.08487	0.705322	1.46443	OK	1.44417	0.982587
3245	chr9	123698421	123699420	+	0	NA	Intergenic	Intergenic	-7469	NM_001190945	7185	Hs.531251	NM_005658	ENSG00000056558	TRAF1	EBI6|MGC:10353	TNF receptor associated factor 1	protein-coding
217	chr22	29702559	29703558	+	0	NA	promoter-TSS (NM_001278730)	promoter-TSS (NM_001278730)	73	NM_001278730	10634	Hs.322852	NM_006478	ENSG00000185340	GAS2L1	GAR22	growth arrest specific 2 like 1	protein-coding
4815	chr8	95218460	95219459	+	0	NA	intron (NM_001144663, intron 1 of 17)	AluJr|SINE|Alu	1856	NM_004063	1015	Hs.591853	NM_004063	ENSG00000079112	CDH17	CDH16|HPT-1|HPT1	cadherin 17	protein-coding	CDH17	-	-	CDH17	CDH17	TSS18325,TSS31520	chr8:95139393-95229531	-	-	0.0260041	0	0.0747431	OK	0.0219257	0	0.0710518	OK	0	0	0	OK	0.00508426	0	0.0534985	OK	0	0	0	OK	0.0173755	0
4076	chr3	134029730	134030729	+	0	NA	Intergenic	Intergenic	56475	NR_106885	102466744		NR_106885	ENSG00000277723	MIR6827	hsa-mir-6827	microRNA 6827	ncRNA	MIR6827	-	-	MIR6827	MIR6827	TSS12553	chr3:134074186-134094259	-	-	0	0	0	OK	0	0	0	OK	0	0	0	OK	0	0	0	OK	0	0	0	OK	0	0
158	chr20	32581893	32582892	+	0	NA	promoter-TSS (NR_109885)	promoter-TSS (NR_109885)	-219	NR_109885	101926888	Hs.405849	NR_109885	ENSG00000228265	RALY-AS1	-	RALY antisense RNA 1	ncRNA	RALY-AS1	-	-	RALY-AS1	RALY-AS1	TSS22180	chr20:32580293-32670991	-	-	2.29035	0	8.21179	OK	2.45675	0	8.81665	OK	3.27879	0	10.9213	OK	2.22598	0	7.93986	OK	2.57097	0	10.1044	OK	2.66228	0
281	chr6	155475088	155476087	+	0	NA	intron (NM_012454, intron 6 of 25)	intron (NM_012454, intron 6 of 25)	-62510	NM_001010927	26230	Hs.586279	NM_012454	ENSG00000146426	TIAM2	STEF|TIAM-2	T-cell lymphoma invasion and metastasis 2	protein-coding
3832	chr11	63926499	63927498	+	0	NA	intron (NM_014067, intron 1 of 10)	AluSp|SINE|Alu	6587	NM_014067	28992	Hs.602898	NM_014067	ENSG00000133315	MACROD1	LRP16	MACRO domain containing 1	protein-coding	MACROD1	-	-	MACROD1	MACROD1	TSS21621	chr11:63766029-63933585	-	-	17.0528	12.7359	21.3696	OK	27.9362	21.718	34.1543	OK	23.8818	18.5316	29.232	OK	29.0768	22.769	35.3845	OK	17.8272	13.483	22.1714	OK	23.372	18.0025
3412	chr11	60379256	60380255	+	0	NA	Intergenic	Intergenic	-3469	NR_026946	283197	Hs.372650	NM_174939	ENSG00000181995	LINC00301	C11orf64|NCRNA00301	long intergenic non-protein coding RNA 301	ncRNA
4928	chr2	162137814	162138813	+	0	NA	Intergenic	Intergenic	-26473	NM_005805	10213	Hs.740477	NM_005805	ENSG00000115233	PSMD14	PAD1|POH1|RPN11	proteasome 26S subunit, non-ATPase 14	protein-coding	PSMD14	-	-	PSMD14	PSMD14	TSS29501	chr2:162164785-162268228	-	-	123.93	103.374	144.485	OK	107.059	89.0888	125.029	OK	134.827	112.505	157.149	OK	124.402	103.748	145.056	OK	123.444	102.925	143.963	OK	92.314	76.7065
6415	chr10	72432041	72433040	+	0	NA	5' UTR (NM_139155, exon 1 of 22)	5' UTR (NM_139155, exon 1 of 22)	278	NM_080722	140766	Hs.352156	NM_080722	ENSG00000138316	ADAMTS14	-	ADAM metallopeptidase with thrombospondin type 1 motif 14	protein-coding	ADAMTS14	-	-	ADAMTS14	ADAMTS14	TSS27884	chr10:72432558-72522195	-	-	1.49798	1.07646	1.91951	OK	3.89419	3.03575	4.75263	OK	1.56556	1.14754	1.98359	OK	2.18585	1.63728	2.73442	OK	0.489448	0.293238	0.685658	OK	2.96077	2.26405
3658	chr14	105559203	105560202	+	0	NA	promoter-TSS (NR_110546)	promoter-TSS (NR_110546)	-782	NR_110546	102723354	Hs.569410	NR_110546		LOC102723354	-	uncharacterized LOC102723354	ncRNA	LOC102723354	-	-	LOC102723354	LOC102723354	TSS15883	chr14:105560483-105565833	-	-	0	0	0	OK	0	0	0	OK	0	0	0	OK	0	0	0	OK	0	0	0	OK	0.0332295	0
1418	chr20	58824106	58825105	+	0	NA	intron (NR_046099, intron 3 of 4)	MIRb|SINE|MIR	-58927	NR_030376	693231		NR_030376	ENSG00000207802	MIR646	MIRN646|hsa-mir-646	microRNA 646	ncRNA	MIR646	-	-	MIR646	MIR646	TSS1150	chr20:58713547-58897314	-	-	0	0	0	OK	0	0	0	OK	0	0	0	OK	0	0	0	OK	0	0	0	OK	0	0
36	chr18	54317931	54318930	+	0	NA	promoter-TSS (NM_015285)	promoter-TSS (NM_015285)	-186	NM_015285	23335	Hs.465213	NM_015285	ENSG00000091157	WDR7	TRAG	WD repeat domain 7	protein-coding	WDR7	-	-	WDR7	WDR7	TSS6317	chr18:54318615-54697036	-	-	4.01204	3.19379	4.83029	OK	3.98238	3.16526	4.7995	OK	3.56748	2.81673	4.31824	OK	2.77611	2.16505	3.38717	OK	3.80592	3.01839	4.59344	OK	2.59488	2.01957
6485	chr13	31038236	31039235	+	0	NA	promoter-TSS (NM_001313892)	promoter-TSS (NM_001313892)	-271	NM_001313892	3146	Hs.434102	NM_002128	ENSG00000189403	HMGB1	HMG-1|HMG1|HMG3|SBP-1	high mobility group box 1	protein-coding
5150	chr2	36935172	36936171	+	0	NA	intron (NM_053276, intron 1 of 15)	intron (NM_053276, intron 1 of 15)	11838	NM_001177969	5212	Hs.137415	NM_053276	ENSG00000205221	VIT	-	vitrin	protein-coding
1368	chr12	7011716	7012715	+	0	NA	Intergenic	AluJo|SINE|Alu	-1682	NM_001135217	10233	Hs.155586	NM_006992	ENSG00000010626	LRRC23	LRPB7	leucine rich repeat containing 23	protein-coding
748	chr22	20922928	20923927	+	0	NA	intron (NM_001293234, intron 8 of 16)	intron (NM_001293234, intron 8 of 16)	61092	NM_001293237	51586	Hs.517421	NM_015889	ENSG00000099917	MED15	ARC105|CAG7A|CTG7A|PCQAP|TIG-1|TIG1|TNRC7	mediator complex subunit 15	protein-coding
472	chr20	49362683	49363682	+	0	NA	intron (NM_032521, intron 2 of 2)	intron (NM_032521, intron 2 of 2)	15101	NM_032521	84612	Hs.589848	NM_032521	ENSG00000124171	PARD6B	PAR6B	par-6 family cell polarity regulator beta	protein-coding	PARD6B	-	-	PARD6B	PARD6B	TSS11650	chr20:49348080-49370278	-	-	0.293056	0.145224	0.440888	OK	0.421886	0.236059	0.607714	OK	0.416391	0.22444	0.608342	OK	0.273396	0.130882	0.41591	OK	0.359212	0.189047	0.529377	OK	0.318503	0.164825
1655	chr20	61491874	61492873	+	0	NA	intron (NM_006602, intron 1 of 5)	CpG	742	NM_006602	10732	Hs.126248	NM_006602	ENSG00000101190	TCFL5	CHA|E2BP-1|Figlb|SOSF1|bHLHe82	transcription factor like 5	protein-coding	TCFL5	-	-	TCFL5	TCFL5	TSS9822	chr20:61448413-61493115	-	-	1.35344	0.823048	1.88383	OK	1.00156	0.550494	1.45262	OK	1.28239	0.762326	1.80246	OK	1.39798	0.788741	2.00722	OK	0.846965	0.428192	1.26574	OK	1.27027	0.684791
5077	chr11	10326234	10327233	+	0	NA	5' UTR (NM_001124, exon 1 of 4)	5' UTR (NM_001124, exon 1 of 4)	206	NM_001124	133	Hs.441047	NM_001124	ENSG00000148926	ADM	AM|PAMP	adrenomedullin	protein-coding	ADM	-	-	ADM	ADM	TSS9200	chr11:10326526-10328949	-	-	224.376	187.23	261.522	OK	255.788	213.95	297.626	OK	276.697	231.615	321.779	OK	214.475	179.079	249.872	OK	193.84	161.626	226.054	OK	96.6717	79.7956
1943	chr20	52824187	52825186	+	0	NA	intron (NM_002623, intron 1 of 3)	CpG	184	NM_002623	5203	Hs.91161	NM_002623	ENSG00000101132	PFDN4	C1|PFD4	prefoldin subunit 4	protein-coding	PFDN4	-	-	PFDN4	PFDN4	TSS31384	chr20:52824501-52836492	-	-	19.7871	15.4659	24.1082	OK	23.9946	18.8575	29.1317	OK	29.6545	23.4309	35.878	OK	40.6534	32.766	48.5408	OK	26.1273	20.6876	31.567	OK	21.1906	16.5997
711	chr11	124592911	124593910	+	0	NA	Intergenic	Intergenic	-16419	NM_001126181	4900	Hs.524116	NM_006176	ENSG00000154146	NRGN	RC3|hng	neurogranin	protein-coding
132	chr17	37024171	37025170	+	0	NA	Intergenic	Intergenic	-1442	NR_073384	3927	Hs.741156	NM_006148	ENSG00000002834	LASP1	Lasp-1|MLN50	LIM and SH3 protein 1	protein-coding
1791	chr12	3185656	3186655	+	0	NA	promoter-TSS (NM_001168320)	promoter-TSS (NM_001168320)	-366	NM_001168320	10867	Hs.504517	NM_006675	ENSG00000011105	TSPAN9	NET-5|NET5|PP1057	tetraspanin 9	protein-coding
5412	chr8	23398252	23399251	+	0	NA	intron (NM_001317814, intron 2 of 4)	intron (NM_001317814, intron 2 of 4)	12443	NM_016612	51312	Hs.596025	NM_016612	ENSG00000147454	SLC25A37	HT015|MFRN|MFRN1|MSC|MSCP|PRO1278|PRO1584|PRO2217	solute carrier family 25 member 37	protein-coding	SLC25A37	-	-	SLC25A37	SLC25A37	TSS18558	chr8:23386362-23430063	-	-	7.24535	5.33849	9.15222	OK	8.30213	6.2221	10.3822	OK	10.9418	8.39217	13.4915	OK	14.6274	11.416	17.8388	OK	7.46114	5.55355	9.36873	OK	7.89719	5.90052
3779	chr6	57086396	57087395	+	0	NA	promoter-TSS (NM_001278668)	promoter-TSS (NM_001278668)	217	NM_001278666	51715	Hs.555016	NM_016277	ENSG00000112210	RAB23	HSPC137	RAB23, member RAS oncogene family	protein-coding
5724	chr11	792696	793695	+	0	NA	intron (NM_001191061, intron 5 of 9)	intron (NM_001191061, intron 5 of 9)	3068	NM_024698	79751	Hs.99486	NM_024698	ENSG00000177542	SLC25A22	EIEE3|GC-1|GC1|NET44	solute carrier family 25 member 22	protein-coding	SLC25A22	-	-	SLC25A22	SLC25A22	TSS17495,TSS20237,TSS30442	chr11:790474-805250	-	-	45.9148	37.2858	54.5438	OK	20.9929	16.5731	25.4127	OK	69.7216	57.5104	81.9328	OK	33.7789	26.9866	40.5713	OK	36.7055	29.7126	43.6984	OK	21.1597	16.6738
3747	chr20	49638974	49639973	+	0	NA	5' UTR (NM_002237, exon 1 of 3)	5' UTR (NM_002237, exon 1 of 3)	202	NM_002237	3755	Hs.118695	NM_002237	ENSG00000026559	KCNG1	K13|KCNG|KV6.1|kH2	potassium voltage-gated channel modifier subfamily G member 1	protein-coding	KCNG1	-	-	KCNG1	KCNG1	TSS2495	chr20:49620192-49639675	-	-	1.86405	1.10897	2.61913	OK	9.36237	7.09701	11.6277	OK	4.15593	2.93844	5.37343	OK	9.95077	7.57833	12.3232	OK	8.68293	6.54548	10.8204	OK	15.3949	12.0144
2180	chr5	34565996	34566995	+	0	NA	Intergenic	L3|LINE|CR1	-89938	NM_015577	26064	Hs.431400	NM_015577	ENSG00000039560	RAI14	NORPEG|RAI13	retinoic acid induced 14	protein-coding	RAI14	-	-	RAI14	RAI14	TSS15439,TSS24856,TSS28715,TSS7262	chr5:34656432-34832717	-	-	69.3012	58.0193	80.5832	OK	43.0344	35.8788	50.19	OK	63.8361	53.5213	74.1508	OK	36.3944	30.301	42.4878	OK	87.0551	72.9785	101.132	OK	39.3241	32.7757
2769	chr20	34638142	34639141	+	0	NA	non-coding (NR_027451, exon 1 of 1)	non-coding (NR_027451, exon 1 of 1)	241	NR_027451	647979	Hs.743232	NR_027451	ENSG00000260032	NORAD	LINC00657	non-coding RNA activated by DNA damage	ncRNA
1428	chr7	15860851	15861850	+	0	NA	Intergenic	Intergenic	133347	NR_110094	101927524	Hs.386790	NR_110094		MEOX2-AS1	-	MEOX2 antisense RNA 1 (head to head)	ncRNA	MEOX2-AS1	-	-	MEOX2-AS1	MEOX2-AS1	TSS20129	chr7:15728002-15736517	-	-	0.434885	0.179336	0.690434	OK	0.459534	0.186951	0.732118	OK	1.68332	1.07687	2.28978	OK	0.978691	0.556512	1.40087	OK	0.166005	0.0181954	0.313814	OK	0.275402	0.078677
6060	chr1	100994883	100995882	+	0	NA	Intergenic	MLT1A0|LTR|ERVL-MaLR	-8346	NM_022049	54112	Hs.170053	NM_022049	ENSG00000181656	GPR88	COCPMR|STRG	G protein-coupled receptor 88	protein-coding	GPR88	-	-	GPR88	GPR88	TSS26867	chr1:101003727-101007583	-	-	0	0	0	OK	0.00744211	0	0.0478087	OK	0.00814087	0	0.0488316	OK	0	0	0	OK	0	0	0	OK	0.0080095	0
4081	chrX	147949035	147950034	+	0	NA	intron (NM_001170628, intron 4 of 17)	intron (NM_001170628, intron 4 of 17)	148919	NM_001170628	2334	Hs.496911	NM_002025	ENSG00000155966	AFF2	FMR2|FMR2P|FRAXE|MRX2|OX19	AF4/FMR2 family member 2	protein-coding
5369	chr4	49288998	49289997	+	0	NA	Intergenic	Intergenic	300838	NM_001286791	80157	Hs.479703	NM_025087	ENSG00000109182	CWH43	CWH43-C	cell wall biogenesis 43 C-terminal homolog	protein-coding
1018	chr20	836807	837806	+	0	NA	Intergenic	Intergenic	12055	NM_031424	83541	Hs.574822	NM_031424	ENSG00000125898	FAM110A	C20orf55|F10|bA371L19.3	family with sequence similarity 110 member A	protein-coding	FAM110A	-	-	FAM110A	FAM110A	TSS24300,TSS25548,TSS750,TSS8711	chr20:814339-826922	-	-	3.58218	2.27503	4.88933	OK	4.29556	2.91425	5.67687	OK	3.33299	2.17657	4.4894	OK	6.71188	4.86179	8.56198	OK	3.99134	2.69104	5.29163	OK	3.75434	2.48641
4992	chr7	104102205	104103204	+	0	NA	intron (NM_199000, intron 1 of 2)	L1PREC2|LINE|L1	133600	NM_199000	375612	Hs.659164	NM_199000	ENSG00000187416	LHFPL3	LHFPL4	lipoma HMGIC fusion partner-like 3	protein-coding	LHFPL3	-	-	LHFPL3	LHFPL3	TSS325	chr7:103969103-104567092	-	-	0.0118408	0	0.0505902	OK	0.00704957	0	0.0486686	OK	0	0	0	OK	0	0	0	OK	0	0	0	OK	0.0068733	0
1125	chr12	131310541	131311540	+	0	NA	intron (NM_001980, intron 2 of 9)	intron (NM_001980, intron 2 of 9)	12779	NM_194356	2054	Hs.437585	NM_001980	ENSG00000111450	STX2	EPIM|EPM|STX2A|STX2B|STX2C	syntaxin 2	protein-coding
2279	chr10	91379713	91380712	+	0	NA	intron (NM_148977, intron 1 of 6)	MER11A|LTR|ERVK	23436	NM_148978	53354	Hs.163555	NM_138316	ENSG00000152782	PANK1	PANK	pantothenate kinase 1	protein-coding
741	chr3	16554778	16555777	+	0	NA	promoter-TSS (NM_015150)	promoter-TSS (NM_015150)	-55	NM_015150	23180	Hs.98910	NM_015150	ENSG00000131378	RFTN1	MIG2|PIB10|PIG9|RAFTLIN	raftlin, lipid raft linker 1	protein-coding	RFTN1	-	-	RFTN1	RFTN1	TSS18322	chr3:16357351-16555222	-	-	25.4761	20.846	30.1063	OK	32.174	26.516	37.8321	OK	28.2575	23.24	33.2751	OK	44.9694	37.2944	52.6445	OK	28.2983	23.2454	33.3512	OK	34.2858	28.2975
6126	chr14	61854757	61855756	+	0	NA	intron (NM_006255, intron 1 of 13)	intron (NM_006255, intron 1 of 13)	67095	NM_006255	5583	Hs.333907	NM_006255	ENSG00000027075	PRKCH	PKC-L|PKCL|PRKCL|nPKC-eta	protein kinase C eta	protein-coding	PRKCH	-	-	PRKCH	PRKCH	TSS6627	chr14:61788160-62017698	-	-	2.5991	1.90613	3.29207	OK	2.09726	1.50782	2.68669	OK	1.21176	0.814125	1.6094	OK	1.84933	1.31029	2.38838	OK	2.6276	1.93161	3.3236	OK	4.34477	3.32594
5696	chr16	89716755	89717754	+	0	NA	intron (NR_046418, intron 3 of 6)	intron (NR_046418, intron 3 of 6)	-6898	NM_153025	124045	Hs.655171	NM_153025	ENSG00000167523	SPATA33	C16orf55	spermatogenesis associated 33	protein-coding	SPATA33	-	-	SPATA33	SPATA33	TSS27791,TSS30636,TSS9490	chr16:89710838-89736866	-	-	6.23317	1.07326	11.3931	OK	3.94855	0	8.13635	OK	4.99283	0.451247	9.53442	OK	4.68115	0.273584	9.08871	OK	4.41721	0	9.37716	OK	4.55733	0
998	chr10	22189362	22190361	+	0	NA	intron (NM_022365, intron 7 of 11)	intron (NM_022365, intron 7 of 11)	102789	NM_022365	64215	Hs.499000	NM_022365	ENSG00000136770	DNAJC1	DNAJL1|ERdj1|HTJ1|MTJ1	DnaJ heat shock protein family (Hsp40) member C1	protein-coding	DNAJC1	-	-	DNAJC1	DNAJC1	TSS24813	chr10:22045476-22292650	-	-	16.2528	12.8714	19.6343	OK	21.7749	17.4427	26.1071	OK	10.3574	8.00998	12.7047	OK	13.5411	10.6368	16.4453	OK	18.3309	14.6033	22.0586	OK	24.6662	19.8873
6792	chr9	79186267	79187266	+	0	NA	Intergenic	LSU-rRNA_Hsa|rRNA|rRNA	71217	NM_001097636	2650	Hs.521568	NM_001490	ENSG00000187210	GCNT1	C2GNT|C2GNT-L|C2GNT1|G6NT|NACGT2|NAGCT2	glucosaminyl (N-acetyl) transferase 1, core 2	protein-coding
2806	chr21	38280096	38281095	+	0	NA	intron (NM_000411, intron 6 of 11)	AluJo|SINE|Alu	58361	NM_001242784	3141	Hs.371350	NM_000411	ENSG00000159267	HLCS	HCS	holocarboxylase synthetase	protein-coding
4831	chr20	49631371	49632370	+	0	NA	intron (NM_002237, intron 1 of 2)	L2b|LINE|L2	7805	NM_002237	3755	Hs.118695	NM_002237	ENSG00000026559	KCNG1	K13|KCNG|KV6.1|kH2	potassium voltage-gated channel modifier subfamily G member 1	protein-coding	KCNG1	-	-	KCNG1	KCNG1	TSS2495	chr20:49620192-49639675	-	-	1.86405	1.10897	2.61913	OK	9.36237	7.09701	11.6277	OK	4.15593	2.93844	5.37343	OK	9.95077	7.57833	12.3232	OK	8.68293	6.54548	10.8204	OK	15.3949	12.0144
4621	chr2	45502299	45503298	+	0	NA	Intergenic	Intergenic	-20718	NR_033831	400952	Hs.468368	NR_033831	ENSG00000205054	LINC01121	UNQ6975	long intergenic non-protein coding RNA 1121	ncRNA	LINC01121	-	-	LINC01121	LINC01121	TSS19120	chr2:45401479-45482080	-	-	0	0	0	OK	0.0947923	0	0.29235	OK	0	0	0	OK	0	0	0	OK	0	0	0	OK	0	0
3032	chr10	25011836	25012835	+	0	NA	intron (NM_020824, intron 1 of 25)	CpG	262	NM_020824	57584	Hs.524195	NM_020824	ENSG00000107863	ARHGAP21	ARHGAP10	Rho GTPase activating protein 21	protein-coding	ARHGAP21	-	-	ARHGAP21	ARHGAP21	TSS26153	chr10:24872537-25012597	-	-	2.17251	1.67342	2.6716	OK	2.09423	1.60627	2.58218	OK	2.13936	1.64232	2.63641	OK	1.99328	1.52514	2.46141	OK	2.71745	2.11844	3.31646	OK	2.54859	1.98172
1789	chrX	45568900	45569899	+	0	NA	Intergenic	Intergenic	-21178	NR_102268	392452	Hs.745266	NR_102268		LOC392452	-	mitochondrial fission factor pseudogene	pseudo	LOC392452	-	-	LOC392452	LOC392452	TSS32195	chrX:45590576-45591246	-	-	0.990946	0.1541	1.82779	OK	0.048769	0	0.270782	OK	4.21211	2.36307	6.06114	OK	1.11163	0.251001	1.97226	OK	0	0	0	OK	0.109504	0
3880	chr16	14471505	14472504	+	0	NA	Intergenic	AluSq|SINE|Alu	-7881	NR_131191	105447648	Hs.554151	NR_131191	ENSG00000260009	LINC02130	-	long intergenic non-protein coding RNA 2130	ncRNA
4757	chr16	84795325	84796324	+	0	NA	intron (NR_073578, intron 5 of 10)	intron (NR_073578, intron 5 of 10)	-57763	NM_031476	83716	Hs.513779	NM_031476	ENSG00000103196	CRISPLD2	CRISP11|LCRISP2|LGL1	cysteine rich secretory protein LCCL domain containing 2	protein-coding	CRISPLD2	-	-	CRISPLD2	CRISPLD2	TSS27164	chr16:84853586-84943116	-	-	4.69649	3.65847	5.73452	OK	5.43182	4.26808	6.59556	OK	0.160371	0.0554244	0.265317	OK	1.95043	1.41811	2.48275	OK	8.18515	6.55333	9.81696	OK	11.7209	9.50712
3947	chr6	10760472	10761471	+	0	NA	TTS (NM_001286489)	TTS (NM_001286489)	12979	NR_104454	81853	Hs.95600	NM_030969	ENSG00000137210	TMEM14B	-	transmembrane protein 14B	protein-coding
3192	chr5	159408418	159409417	+	0	NA	Intergenic	MLT1G3|LTR|ERVL-MaLR	-27190	NM_001282500	7265	Hs.519718	NM_003314	ENSG00000113312	TTC1	TPR1	tetratricopeptide repeat domain 1	protein-coding
2076	chr4	146402815	146403814	+	0	NA	promoter-TSS (NM_001003688)	promoter-TSS (NM_001003688)	363	NM_005900	4086	Hs.604588	NM_005900	ENSG00000170365	SMAD1	BSP-1|BSP1|JV4-1|JV41|MADH1|MADR1	SMAD family member 1	protein-coding	SMAD1	-	-	SMAD1	SMAD1	TSS21256,TSS8117	chr4:146402950-146480325	-	-	11.6046	9.27274	13.9364	OK	9.48651	7.49846	11.4746	OK	12.9593	10.3487	15.57	OK	10.39	8.26663	12.5134	OK	8.50185	6.69285	10.3108	OK	8.10188	6.36554
4294	chr13	31159766	31160765	+	0	NA	intron (NM_001313893, intron 1 of 4)	AluJb|SINE|Alu	31469	NM_001313893	3146	Hs.434102	NM_002128	ENSG00000189403	HMGB1	HMG-1|HMG1|HMG3|SBP-1	high mobility group box 1	protein-coding
5159	chr12	124868592	124869591	+	0	NA	intron (NM_001077261, intron 19 of 47)	intron (NM_001077261, intron 19 of 47)	-47303	NR_106940	102466204		NR_106940	ENSG00000275967	MIR6880	hsa-mir-6880	microRNA 6880	ncRNA	MIR6880	-	-	MIR6880	MIR6880	TSS7479	chr12:124808956-125052010	-	-	0	0	0	OK	0	0	0	OK	0	0	0	OK	0	0	0	OK	0	0	0	OK	0	0
6733	chr7	39902216	39903215	+	0	NA	Intergenic	AluY|SINE|Alu	-87244	NM_031267	8621	Hs.233552	NM_003718	ENSG00000065883	CDK13	CDC2L|CDC2L5|CHED|hCDK13	cyclin dependent kinase 13	protein-coding
1545	chr17	73127245	73128244	+	0	NA	exon (NM_014595, exon 1 of 5)	exon (NM_014595, exon 1 of 5)	146	NM_001252377	30833	Hs.67201	NM_014595	ENSG00000125458	NT5C	DNT|DNT1|HEL74|P5N2|PN-I|PN-II|UMPH2|cdN|dNT-1	5', 3'-nucleotidase, cytosolic	protein-coding
1838	chr17	8225174	8226173	+	0	NA	3' UTR (NM_173728, exon 16 of 16)	3' UTR (NM_173728, exon 16 of 16)	11533	NM_025014	22899	Hs.443109	NM_025014	ENSG00000198844	ARHGEF15	ARGEF15|E5|Ephexin5|Vsm-RhoGEF	Rho guanine nucleotide exchange factor 15	protein-coding	ARHGEF15	-	-	ARHGEF15	ARHGEF15	TSS14415,TSS6884	chr17:8213555-8225834	-	-	0	0	0	OK	0.0203535	0	0.0748626	OK	0	0	0	OK	0.0148704	0	0.0590583	OK	0.00498865	0	0.0502556	OK	0	0
6468	chr12	25379769	25380768	+	0	NA	exon (NM_033360, exon 3 of 6)	exon (NM_033360, exon 3 of 6)	23597	NM_004985	3845	Hs.505033	NM_004985	ENSG00000133703	KRAS	C-K-RAS|CFC2|K-RAS2A|K-RAS2B|K-RAS4A|K-RAS4B|KI-RAS|KRAS1|KRAS2|NS|NS3|RALD|RASK2|c-Ki-ras2	KRAS proto-oncogene, GTPase	protein-coding	KRAS	-	-	KRAS	KRAS	TSS30087	chr12:25348149-25403865	-	-	8.84457	7.04522	10.6439	OK	11.5171	9.22505	13.809	OK	7.86952	6.11449	9.62455	OK	9.54325	7.47821	11.6083	OK	10.8999	8.76955	13.0303	OK	10.0375	7.87916
1773	chr8	29939912	29940911	+	0	NA	exon (NM_016127, exon 1 of 6)	exon (NM_016127, exon 1 of 6)	313	NM_016127	51669	Hs.521487	NM_016127	ENSG00000133872	SARAF	FOAP-7|HSPC035|TMEM66|XTP3	store-operated calcium entry associated regulatory factor	protein-coding	SARAF	-	-	SARAF	SARAF	TSS31219	chr8:29920257-30108213	-	-	99.1771	78.5151	119.839	OK	131.671	105.778	157.564	OK	125.172	98.9049	151.439	OK	133.905	107.279	160.531	OK	137.85	110.598	165.102	OK	197.282	160.881
1058	chr19	50320910	50321909	+	0	NA	promoter-TSS (NM_030973)	promoter-TSS (NM_030973)	-127	NM_030973	81857	Hs.656639	NM_030973	ENSG00000104973	MED25	ACID1|ARC92|BVSYS|CMT2B2|P78|PTOV2|TCBAP0758	mediator complex subunit 25	protein-coding	MED25	-	-	MED25	MED25	TSS814	chr19:50321535-50340237	-	-	5.64225	4.15081	7.13369	OK	8.48738	6.51294	10.4618	OK	6.57635	4.99233	8.16037	OK	8.65938	6.66052	10.6582	OK	7.8877	5.98646	9.78894	OK	11.9429	9.33829
4989	chr8	98500093	98501092	+	0	NA	Intergenic	AluSz6|SINE|Alu	-41867	NR_125390	101927066	Hs.732112	NR_125390		LOC101927066	-	uncharacterized LOC101927066	ncRNA	LOC101927066	-	-	LOC101927066	LOC101927066	TSS5322	chr8:97657454-98458725	-	-	0	0	0	OK	0	0	0	OK	0	0	0	OK	0	0	0	OK	0	0	0	OK	0	0
3883	chr11	11412955	11413954	+	0	NA	intron (NM_198516, intron 3 of 10)	LTR16C|LTR|ERVL	-38550	NM_001256686	283106	Hs.654675	NM_001256686	ENSG00000254598	CSNK2A3	CSNK2A1P	casein kinase 2 alpha 3	protein-coding	CSNK2A3	-	-	CSNK2A3	CSNK2A3	TSS21820	chr11:11292420-11643561	-	-	12.8027	9.09053	16.5148	OK	13.0993	9.42706	16.7716	OK	13.1163	9.65824	16.5744	OK	12.3145	9.11528	15.5138	OK	11.7386	7.15344	16.3238	OK	11.0197	7.62534
6192	chr12	6645971	6646970	+	0	NA	intron (NM_001256799, intron 5 of 7)	intron (NM_001256799, intron 5 of 7)	2085	NM_001256799	2597	Hs.544577	NM_002046	ENSG00000111640	GAPDH	G3PD|GAPD|HEL-S-162eP	glyceraldehyde-3-phosphate dehydrogenase	protein-coding
3704	chr10	63626111	63627110	+	0	NA	Intergenic	Intergenic	-34403	NM_032199	84159	Hs.535297	NM_032199	ENSG00000150347	ARID5B	DESRT|MRF-2|MRF2	AT-rich interaction domain 5B	protein-coding	ARID5B	-	-	ARID5B	ARID5B	TSS24676,TSS26010	chr10:63661012-63856707	-	-	51.7249	43.4404	60.0094	OK	28.5588	23.7153	33.4024	OK	42.2047	35.3416	49.0679	OK	17.9359	14.872	20.9997	OK	69.5129	58.3865	80.6393	OK	27.3524	22.7753
3166	chr11	1988706	1989705	+	0	NA	Intergenic	Intergenic	18644	NR_132974	106635549		NR_132974		SNORD131	-	small nucleolar RNA, C/D box 131	snoRNA
5417	chr11	129277996	129278995	+	0	NA	intron (NM_003658, intron 1 of 3)	L2c|LINE|L2	32614	NM_003658	8538	Hs.591944	NM_003658	ENSG00000043039	BARX2	-	BARX homeobox 2	protein-coding	BARX2	-	-	BARX2	BARX2	TSS28941	chr11:129245880-129322174	-	-	0	0	0	OK	0	0	0	OK	0	0	0	OK	0	0	0	OK	0	0	0	OK	0	0
6211	chr6	143508446	143509445	+	0	NA	3' UTR (NM_001286588, exon 4 of 4)	3' UTR (NM_001286588, exon 4 of 4)	126966	NM_016108	51390	Hs.567501	NM_016108	ENSG00000146416	AIG1	AIG-1|dJ95L4.1	androgen induced 1	protein-coding	AIG1	-	-	AIG1	AIG1	TSS3411,TSS6941	chr6:143380499-143661480	-	-	14.7559	11.3422	18.1695	OK	23.556	18.5166	28.5954	OK	13.1903	10.0308	16.3497	OK	22.4064	17.6052	27.2075	OK	16.5783	12.7708	20.3857	OK	25.508	20.2314
3392	chr9	71711730	71712729	+	0	NA	intron (NM_001161706, intron 4 of 4)	intron (NM_001161706, intron 4 of 4)	-23951	NM_001170414	9414	Hs.50382	NM_004817	ENSG00000119139	TJP2	C9DUPq21.11|DFNA51|DUP9q21.11|PFIC4|X104|ZO2	tight junction protein 2	protein-coding
6374	chr1	17025614	17026613	+	0	NA	non-coding (NR_026567, exon 8 of 11)	non-coding (NR_026567, exon 8 of 11)	18363	NR_037446	100500876		NR_037446	ENSG00000263811	MIR3675	-	microRNA 3675	ncRNA	MIR3675	-	-	MIR3675	MIR3675	TSS21567,TSS6179,TSS6604	chr1:16875408-16875482	-	-	0	0	0	OK	0	0	0	OK	0	0	0	OK	0	0	0	OK	0	0	0	OK	0	0
2860	chr6	132785599	132786598	+	0	NA	intron (NR_137169, intron 7 of 8)	L2a|LINE|L2	47836	NM_001326578	8417	Hs.593148	NM_003569	ENSG00000079950	STX7	-	syntaxin 7	protein-coding
3141	chr13	77975640	77976639	+	0	NA	Intergenic	LTR88c|LTR|Gypsy?	-74962	NM_015057	23077	Hs.591221	NM_015057	ENSG00000005810	MYCBP2	Myc-bp2|PAM|Phr	MYC binding protein 2, E3 ubiquitin protein ligase	protein-coding	MYCBP2	-	-	MYCBP2	MYCBP2	TSS2900	chr13:77618791-77901177	-	-	1.156	0.899739	1.41226	OK	1.30056	1.01605	1.58508	OK	1.31021	1.02375	1.59667	OK	1.26229	0.984925	1.53966	OK	0.902779	0.690537	1.11502	OK	1.42115	1.11799
1535	chr22	18455111	18456110	+	0	NA	intron (NM_015241, intron 1 of 31)	Eulor9B|DNA|DNA	8117	NR_030378	693233		NR_030378	ENSG00000207780	MIR648	MIRN648|hsa-mir-648	microRNA 648	ncRNA	MIR648	-	-	MIR648	MIR648	TSS27053	chr22:18270415-18507325	-	-	0	0	0	OK	0	0	0	OK	0	0	0	OK	0	0	0	OK	0	0	0	OK	0	0
5299	chr7	116285012	116286011	+	0	NA	Intergenic	Intergenic	-26902	NM_001324402	4233	Hs.132966	NM_000245	ENSG00000105976	MET	AUTS9|DFNB97|HGFR|RCCP2|c-Met	MET proto-oncogene, receptor tyrosine kinase	protein-coding
4978	chr4	129937076	129938075	+	0	NA	intron (NM_144643, intron 5 of 20)	L1PA10|LINE|L1	77187	NM_001300898	132320	Hs.654690	NM_144643	ENSG00000151466	SCLT1	CAP-1A|CAP1A	sodium channel and clathrin linker 1	protein-coding
3775	chr4	1872023	1873022	+	0	NA	promoter-TSS (NM_001042424)	promoter-TSS (NM_001042424)	-601	NM_001042424	7468	Hs.113876	NM_007331	ENSG00000109685	NSD2	KMT3F|KMT3G|MMSET|REIIBP|TRX5|WHS|WHSC1	nuclear receptor binding SET domain protein 2	protein-coding
5258	chr8	10586608	10588332	+	0	NA	intron (NM_031439, intron 1 of 1)	CpG	614	NM_031439	83595	Hs.709543	NM_031439	ENSG00000171056	SOX7	-	SRY-box 7	protein-coding	SOX7	-	-	SOX7	SOX7	TSS23459	chr8:10581277-10588084	-	-	0.0640536	0	0.144157	OK	0.0491189	0	0.129042	OK	0.174581	0.0379402	0.311221	OK	0.115801	0.00976034	0.221843	OK	0.114889	0.00747643	0.222301	OK	0.0624859	0
6450	chr11	92702361	92703360	+	0	NA	promoter-TSS (NM_005959)	promoter-TSS (NM_005959)	71	NM_005959	4544	Hs.569039	NM_005959	ENSG00000134640	MTNR1B	FGQTL2|MEL-1B-R|MT2	melatonin receptor 1B	protein-coding	MTNR1B	-	-	MTNR1B	MTNR1B	TSS13900	chr11:92702788-92715948	-	-	0	0	0	OK	0	0	0	OK	0	0	0	OK	0	0	0	OK	0	0	0	OK	0	0
4253	chr17	39942216	39943215	+	0	NA	intron (NM_021991, intron 1 of 14)	CpG	249	NM_002230	3728	Hs.514174	NM_002230	ENSG00000173801	JUP	ARVD12|CTNNG|DP3|DPIII|PDGB|PKGB	junction plakoglobin	protein-coding	JUP	-	-	JUP	JUP	TSS4408	chr17:39910858-39942964	-	-	0.00674601	0	0.0629881	OK	0.00670639	0	0.0627394	OK	0	0	0	OK	0.0447487	0	0.130854	OK	0.006943	0	0.0627019	OK	0.0476688	0
5690	chr8	8527347	8528346	+	0	NA	Intergenic	Intergenic	-31820	NM_194284	137075	Hs.183617	NM_194284	ENSG00000253958	CLDN23	CLDNL|hCG1646163	claudin 23	protein-coding	CLDN23	-	-	CLDN23	CLDN23	TSS20110	chr8:8559665-8561617	-	-	0.720214	0.298712	1.14172	OK	1.02238	0.512754	1.532	OK	0.183729	0	0.390151	OK	0.334738	0.0545796	0.614896	OK	0.651706	0.248577	1.05484	OK	0.756105	0.319386
1335	chr14	75642941	75643940	+	0	NA	promoter-TSS (NM_006827)	promoter-TSS (NM_006827)	-91	NM_006827	10972	Hs.74137	NM_006827	ENSG00000170348	TMED10	P24(DELTA)|S31I125|S31III125|TMP21|Tmp-21-I|p23|p24d1	transmembrane p24 trafficking protein 10	protein-coding	TMED10	-	-	TMED10	TMED10	TSS15566	chr14:75598170-75643349	-	-	95.5196	80.1248	110.914	OK	103.014	86.4575	119.57	OK	101.07	84.779	117.362	OK	80.5983	67.5288	93.6677	OK	88.3623	74.0577	102.667	OK	86.393	72.445
4652	chr10	44877272	44878271	+	0	NA	intron (NM_001033886, intron 1 of 3)	intron (NM_001033886, intron 1 of 3)	2774	NM_000609	6387	Hs.522891	NM_000609	ENSG00000107562	CXCL12	IRH|PBSF|SCYB12|SDF1|TLSF|TPAR1	C-X-C motif chemokine ligand 12	protein-coding	CXCL12	-	-	CXCL12	CXCL12	TSS32964	chr10:44865600-44880545	-	-	187.607	156.506	218.707	OK	186.276	154.93	217.622	OK	230.129	192.315	267.943	OK	272.184	227.394	316.974	OK	66.7284	54.7841	78.6727	OK	331.511	276.895
3780	chr10	35701695	35702694	+	0	NA	intron (NM_001282853, intron 2 of 10)	intron (NM_001282853, intron 2 of 10)	76392	NM_001282853	219771	Hs.14745	NM_145012	ENSG00000108100	CCNY	C10orf9|CBCP1|CCNX|CFP1	cyclin Y	protein-coding
6741	chr7	77648423	77649422	+	0	NA	exon (NM_012301, exon 22 of 22)	exon (NM_012301, exon 22 of 22)	179475	NM_001127357	57157	Hs.203965	NM_020432	ENSG00000006576	PHTF2	-	putative homeodomain transcription factor 2	protein-coding
3974	chr22	39916095	39917094	+	0	NA	promoter-TSS (NM_001675)	promoter-TSS (NM_001675)	25	NM_182810	468	Hs.496487	NM_001675	ENSG00000128272	ATF4	CREB-2|CREB2|TAXREB67|TXREB	activating transcription factor 4	protein-coding
4847	chr10	124909049	124910048	+	0	NA	exon (NM_005519, exon 2 of 2)	exon (NM_005519, exon 2 of 2)	1910	NM_005519	3167	Hs.444756	NM_005519	ENSG00000188816	HMX2	H6L|Nkx5-2	H6 family homeobox 2	protein-coding	HMX2	-	-	HMX2	HMX2	TSS27439	chr10:124907637-124910188	-	-	0	0	0	OK	0	0	0	OK	0	0	0	OK	0	0	0	OK	0	0	0	OK	0	0
5240	chr5	141255386	141256385	+	0	NA	intron (NM_002587, intron 1 of 2)	CpG	2090	NM_002587	5097	Hs.79769	NM_002587	ENSG00000156453	PCDH1	PC42|PCDH42	protocadherin 1	protein-coding	PCDH1	-	-	PCDH1	PCDH1	TSS17393,TSS29585,TSS3830	chr5:141232675-141257975	-	-	2.62696	1.94156	3.31236	OK	7.92329	6.32096	9.52562	OK	0.712393	0.435951	0.988834	OK	1.01433	0.671302	1.35736	OK	14.4506	11.7225	17.1787	OK	20.1041	16.4891
3918	chr6	1378499	1379498	+	0	NA	Intergenic	CpG	-11071	NM_001452	2295	Hs.484423	NM_001452	ENSG00000137273	FOXF2	FKHL6|FREAC-2|FREAC2	forkhead box F2	protein-coding	FOXF2	-	-	FOXF2	FOXF2	TSS16751	chr6:1390068-1395832	-	-	2.48179	1.56815	3.39542	OK	1.38033	0.783235	1.97742	OK	0.673515	0.292718	1.05431	OK	0.7932	0.363752	1.22265	OK	1.60256	0.949913	2.25521	OK	1.68152	1.00242
3409	chr1	206847854	206848853	+	0	NA	Intergenic	Intergenic	-10012	NM_032960	9261	Hs.643566	NM_004759	ENSG00000162889	MAPKAPK2	MAPKAP-K2|MK-2|MK2	mitogen-activated protein kinase-activated protein kinase 2	protein-coding
5442	chr3	194648167	194649166	+	0	NA	Intergenic	Intergenic	-166651	NR_104188	100874528	Hs.581659	NR_104188	ENSG00000233303	XXYLT1-AS1	-	XXYLT1 antisense RNA 1	ncRNA	XXYLT1-AS1	-	-	XXYLT1-AS1	XXYLT1-AS1	TSS24786	chr3:194789007-194991895	-	-	0	0	0	OK	0	0	0	OK	0	0	0	OK	0	0	0	OK	0	0	0	OK	0	0
5419	chr14	24029023	24030022	+	0	NA	promoter-TSS (NR_110555)	promoter-TSS (NR_110555)	-784	NR_110555	102724814	Hs.569375	NR_110555	ENSG00000258727	LOC102724814	-	uncharacterized LOC102724814	ncRNA	LOC102724814	-	-	LOC102724814	LOC102724814	TSS28257	chr14:23980968-24048009	-	-	0.318185	0	0.691653	OK	0.594118	0.103581	1.08465	OK	0.314205	0	0.664095	OK	0.627654	0.124655	1.13065	OK	0.329869	0	0.7153	OK	0.809175	0.221231
5011	chr3	193853338	193854337	+	0	NA	promoter-TSS (NM_005524)	promoter-TSS (NM_005524)	-94	NM_005524	3280	Hs.250666	NM_005524	ENSG00000114315	HES1	HES-1|HHL|HRY|bHLHb39	hes family bHLH transcription factor 1	protein-coding	HES1	-	-	HES1	HES1	TSS23782	chr3:193853930-193856401	-	-	2.41018	1.40036	3.41999	OK	2.90015	1.77224	4.02806	OK	0.289524	0	0.584271	OK	0.332403	0.0104069	0.6544	OK	4.40298	2.90394	5.90203	OK	7.29435	5.15174
4490	chr3	94151117	94152116	+	0	NA	Intergenic	LTR16D2|LTR|ERVL	158060	NR_106788	102466722		NR_106788	ENSG00000276830	MIR6730	hsa-mir-6730	microRNA 6730	ncRNA	MIR6730	-	-	MIR6730	MIR6730	TSS18523,TSS28746	chr1:12627938-12677737	-	-	0	0	0	OK	0	0	0	OK	0	0	0	OK	0	0	0	OK	0	0	0	OK	0	0
5270	chr1	20451373	20452372	+	0	NA	Intergenic	L1ME3A|LINE|L1	-5813	NM_001271814	26279	Hs.189507	NM_012400	ENSG00000117215	PLA2G2D	PLA2IID|SPLASH|sPLA2-IID|sPLA2S	phospholipase A2 group IID	protein-coding
165	chr7	127031495	127032494	+	0	NA	intron (NM_176814, intron 1 of 5)	CpG	784	NM_176814	168850	Hs.159006	NM_176814	ENSG00000048405	ZNF800	-	zinc finger protein 800	protein-coding	ZNF800	-	-	ZNF800	ZNF800	TSS32420	chr7:127010096-127032778	-	-	8.56844	6.87576	10.2611	OK	4.68383	3.62617	5.74149	OK	8.12698	6.45334	9.80063	OK	4.55021	3.51952	5.58089	OK	5.89326	4.63636	7.15015	OK	3.82415	2.93201
6588	chr19	621708	622707	+	0	NA	exon (NM_005035, exon 9 of 21)	exon (NM_005035, exon 9 of 21)	11361	NM_005035	5442	Hs.254113	NM_005035	ENSG00000099821	POLRMT	APOLMT|MTRNAP|MTRPOL|h-mtRPOL	RNA polymerase mitochondrial	protein-coding	POLRMT	-	-	POLRMT	POLRMT	TSS9933	chr19:617222-633568	-	-	11.2073	8.8249	13.5896	OK	12.7108	10.1627	15.2588	OK	11.4598	9.15827	13.7614	OK	8.92642	7.01676	10.8361	OK	9.14561	7.16716	11.1241	OK	9.4193	7.41107
4579	chr6	42300662	42301661	+	0	NA	intron (NM_033502, intron 3 of 17)	intron (NM_033502, intron 3 of 17)	-115528	NM_018141	55173	Hs.380887	NM_018141	ENSG00000048544	MRPS10	MRP-S10|PNAS-122	mitochondrial ribosomal protein S10	protein-coding	MRPS10	-	-	MRPS10	MRPS10	TSS7361	chr6:42174538-42185633	-	-	55.1511	45.5891	64.7131	OK	47.6503	39.243	56.0577	OK	68.8163	57.0209	80.6117	OK	57.5855	47.6223	67.5487	OK	56.1898	46.4504	65.9292	OK	41.4721	34.0746
2351	chr7	47533813	47534812	+	0	NA	intron (NM_022748, intron 3 of 30)	intron (NM_022748, intron 3 of 30)	87430	NM_022748	64759	Hs.520814	NM_022748	ENSG00000136205	TNS3	TEM6|TENS1	tensin 3	protein-coding	TNS3	-	-	TNS3	TNS3	TSS30551	chr7:47314751-47621742	-	-	3.05931	2.3922	3.72641	OK	10.2688	8.42546	12.1122	OK	2.39735	1.85929	2.93541	OK	6.01932	4.86161	7.17704	OK	4.27483	3.40392	5.14575	OK	13.3755	11.0318
729	chr6	31696834	31697833	+	0	NA	promoter-TSS (NM_001303008).7	promoter-TSS (NM_001303008).7	-55	NM_001303008	23564	Hs.247362	NM_013974	ENSG00000213722	DDAH2	DDAH|DDAHII|G6a|HEL-S-277|NG30	dimethylarginine dimethylaminohydrolase 2	protein-coding
4509	chr10	96140417	96141416	+	0	NA	Intergenic	AluSz|SINE|Alu	-18183	NM_022451	64318	Hs.74899	NM_022451	ENSG00000173145	NOC3L	AD24|C10orf117|FAD24	NOC3 like DNA replication regulator	protein-coding	NOC3L	-	-	NOC3L	NOC3L	TSS1387	chr10:96092982-96122733	-	-	25.8069	21.1912	30.4227	OK	14.8991	12.065	17.7332	OK	26.4177	21.7066	31.1287	OK	17.9196	14.6008	21.2383	OK	17.3754	14.151	20.5998	OK	7.20185	5.67258
2	chr8	99452659	99453658	+	0	NA	Intergenic	Intergenic	13908	NM_020697	3788	Hs.388045	NM_020697	ENSG00000156486	KCNS2	KV9.2	potassium voltage-gated channel modifier subfamily S member 2	protein-coding	KCNS2	-	-	KCNS2	KCNS2	TSS2179	chr8:99439249-99443023	-	-	0.20878	0.0628384	0.354722	OK	0.0700605	0	0.164468	OK	0.0363111	0	0.106806	OK	0.0468659	0	0.120291	OK	0	0	0	OK	0.0549679	0
4229	chr14	100663219	100664218	+	0	NA	Intergenic	AluJo|SINE|Alu	-37706	NM_206918	123099	Hs.159643	NM_206918	ENSG00000168350	DEGS2	C14orf66|DES2|FADS8	delta 4-desaturase, sphingolipid 2	protein-coding	DEGS2	-	-	DEGS2	DEGS2	TSS13356	chr14:100612752-100626012	-	-	0	0	0	OK	0	0	0	OK	0	0	0	OK	0	0	0	OK	0	0	0	OK	0.0213532	0
6074	chr11	14091808	14092807	+	0	NA	intron (NM_006108, intron 3 of 16)	intron (NM_006108, intron 3 of 16)	108123	NM_006108	10418	Hs.643864	NM_006108	ENSG00000262655	SPON1	VSGP/F-spondin|f-spondin	spondin 1	protein-coding	SPON1	-	-	SPON1	SPON1	TSS10495	chr11:13984183-14289679	-	-	0.103254	0.0239585	0.18255	OK	0.0364075	0	0.0812776	OK	0.0760966	0.00958751	0.142606	OK	0.0199164	0	0.0611868	OK	0.056192	0	0.112624	OK	0.0357926	0
6319	chr1	29352764	29353763	+	0	NA	intron (NM_001166005, intron 7 of 20)	AluJb|SINE|Alu	95750	NM_001171868	399474	Hs.712722	NM_001003682	ENSG00000253304	TMEM200B	TTMB	transmembrane protein 200B	protein-coding
2125	chr15	52029160	52030159	+	0	NA	exon (NM_153374, exon 1 of 3)	exon (NM_153374, exon 1 of 3)	661	NM_153374	256586	Hs.603629	NM_153374	ENSG00000140280	LYSMD2	-	LysM domain containing 2	protein-coding	LYSMD2	-	-	LYSMD2	LYSMD2	TSS14082,TSS27075	chr15:52015260-52043650	-	-	9.61868	7.16173	12.0756	OK	7.59954	5.53854	9.66054	OK	4.68455	3.21027	6.15883	OK	4.14972	2.79248	5.50696	OK	7.54833	5.45813	9.63854	OK	4.06478	2.71183
2553	chr11	65847648	65848647	+	0	NA	intron (NM_018026, intron 1 of 23)	MIRb|SINE|MIR	10323	NM_018026	55690	Hs.644326	NM_018026	ENSG00000175115	PACS1	MRD17|SHMS	phosphofurin acidic cluster sorting protein 1	protein-coding	PACS1	-	-	PACS1	PACS1	TSS31797	chr11:65837823-66012218	-	-	15.341	12.4892	18.1928	OK	19.1854	15.7483	22.6224	OK	11.3765	9.22535	13.5276	OK	10.5906	8.54059	12.6405	OK	15.2902	12.451	18.1295	OK	14.8391	12.0971
1231	chr12	32166882	32167881	+	0	NA	Intergenic	AluJo|SINE|Alu	55028	NM_018169	55196	Hs.445129	NM_018169	ENSG00000174718	KIAA1551	C12orf35|UTA2-1	KIAA1551	protein-coding	KIAA1551	-	-	KIAA1551	KIAA1551	TSS22994	chr12:32112352-32146043	-	-	3.1677	2.48644	3.84896	OK	3.72723	2.9338	4.52065	OK	4.05382	3.19662	4.91101	OK	5.32107	4.25972	6.38241	OK	2.79452	2.17038	3.41866	OK	3.08196	2.41102
2979	chr4	38668439	38669438	+	0	NA	intron (NM_016531, intron 1 of 5)	intron (NM_016531, intron 1 of 5)	-2689	NR_026804	79667	Hs.29725	NM_024614	ENSG00000231160	KLF3-AS1	-	KLF3 antisense RNA 1	ncRNA
3270	chr13	22177702	22178701	+	0	NA	exon (NM_152726, exon 1 of 12)	exon (NM_152726, exon 1 of 12)	154	NM_152726	221154	Hs.412103	NM_152726	ENSG00000165487	MICU2	1110008L20Rik|EFHA1	mitochondrial calcium uptake 2	protein-coding	MICU2	-	-	MICU2	MICU2	TSS22278	chr13:22066827-22178355	-	-	30.526	24.7822	36.2699	OK	27.7646	22.4125	33.1167	OK	25.3422	20.3348	30.3495	OK	22.3129	17.894	26.7318	OK	31.1331	25.2608	37.0054	OK	26.5372	21.4252
2446	chr8	144671110	144672109	+	0	NA	exon (NM_001130053, exon 3 of 10)	exon (NM_001130053, exon 3 of 10)	7974	NM_001130057	1936	Hs.333388	NM_001960	ENSG00000104529	EEF1D	EF-1D|EF1D|FP1047	eukaryotic translation elongation factor 1 delta	protein-coding
973	chr19	1265073	1266072	+	0	NA	Intergenic	Intergenic	-3693	NM_001300829	1153	Hs.618145	NM_001280	ENSG00000099622	CIRBP	CIRP	cold inducible RNA binding protein	protein-coding
2961	chr16	66785104	66786103	+	0	NA	promoter-TSS (NM_006141)	promoter-TSS (NM_006141)	-52	NR_133569	106699570	Hs.513658	NR_133569	ENSG00000246777	LOC106699570	-	uncharacterized LOC106699570	ncRNA
2569	chr14	95688145	95689144	+	0	NA	intron (NM_024734, intron 3 of 12)	(GA)n|Simple_repeat|Simple_repeat	-64297	NM_030621	23405	Hs.87889	NM_030621	ENSG00000100697	DICER1	DCR1|Dicer|Dicer1e|HERNA|K12H4.8-LIKE|MNG1|RMSE2	dicer 1, ribonuclease III	protein-coding	DICER1	-	-	DICER1	DICER1	TSS18339,TSS20747,TSS34170,TSS9919	chr14:95552564-95646270	-	-	4.53983	3.66992	5.40975	OK	2.78779	2.20137	3.37421	OK	3.14766	2.50037	3.79496	OK	1.91276	1.48484	2.34068	OK	4.54538	3.677	5.41375	OK	2.25814	1.77279
5644	chr5	106516593	106518488	+	0	NA	Intergenic	MIRb|SINE|MIR	-170825	NR_104671	102467213	Hs.570923	NR_104671	ENSG00000251027	LINC01950	-	long intergenic non-protein coding RNA 1950	ncRNA
1046	chr1	55180977	55181976	+	0	NA	promoter-TSS (NM_001291333)	promoter-TSS (NM_001291333)	-19	NM_004623	7268	Hs.412482	NM_004623	ENSG00000243725	TTC4	-	tetratricopeptide repeat domain 4	protein-coding	TTC4	-	-	TTC4	TTC4	TSS7590	chr1:55107412-55208328	-	-	22.6302	18.3664	26.8941	OK	14.8579	11.8746	17.8412	OK	25.7987	21.0196	30.5779	OK	16.7926	13.5343	20.0509	OK	17.2926	13.9057	20.6795	OK	9.83533	7.71285
5864	chr13	34067656	34068655	+	0	NA	intron (NM_001243476, intron 4 of 17)	intron (NM_001243476, intron 4 of 17)	182817	NM_001243476	90627	Hs.156551	NM_052851	ENSG00000133121	STARD13	ARHGAP37|DLC2|GT650|LINC00464	StAR related lipid transfer domain containing 13	protein-coding
319	chr16	717471	718470	+	0	NA	promoter-TSS (NM_138769)	promoter-TSS (NM_138769)	-113	NM_138769	89941	Hs.513242	NM_138769	ENSG00000140983	RHOT2	ARHT2|C16orf39|MIRO-2|MIRO2|RASL	ras homolog family member T2	protein-coding	RHOT2	-	-	RHOT2	RHOT2	TSS21973	chr16:718082-724174	-	-	36.7317	30.0266	43.4369	OK	33.7155	27.5846	39.8463	OK	35.6367	29.2584	42.015	OK	37.8166	31.05	44.5832	OK	33.8092	27.6686	39.9498	OK	37.3064	30.5785
4021	chr12	312201	313200	+	0	NA	promoter-TSS (NR_120475)	promoter-TSS (NR_120475)	-111	NR_120475	101929384	Hs.569138	NR_120475	ENSG00000256577	LOC101929384	-	uncharacterized LOC101929384	ncRNA	LOC101929384	-	-	LOC101929384	LOC101929384	TSS4070	chr12:299242-323371	-	-	0	0	0	OK	0	0	0	OK	0	0	0	OK	0.0387337	0	0.229686	OK	0	0	0	OK	0	0
2571	chr1	6844431	6845430	+	0	NA	promoter-TSS (NM_015215)	promoter-TSS (NM_015215)	-454	NM_015215	23261	Hs.397705	NM_015215	ENSG00000171735	CAMTA1	CANPMR	calmodulin binding transcription activator 1	protein-coding	CAMTA1	-	-	CAMTA1	CAMTA1	TSS10270	chr1:6845383-7829766	-	-	66.0598	51.9054	80.2141	OK	90.504	72.1029	108.905	OK	79.8497	63.3348	96.3645	OK	106.291	85.5935	126.989	OK	93.4772	74.7318	112.223	OK	115.341	93.0337
2857	chr10	114911087	114912086	+	0	NA	exon (NM_001198529, exon 9 of 13)	exon (NM_001198529, exon 9 of 13)	106472	NR_132769	106635520		NR_132769		SNORA87	-	small nucleolar RNA, H/ACA box 87	snoRNA
1179	chr19	14516409	14517408	+	0	NA	intron (NM_078481, intron 14 of 19)	CpG	13287	NM_005804	10212	Hs.311609	NM_005804	ENSG00000123136	DDX39A	BAT1|BAT1L|DDX39|DDXL|URH49	DExD-box helicase 39A	protein-coding	DDX39A	-	-	DDX39A	DDX39A	TSS27949	chr19:14519609-14530195	-	-	85.9188	70.8711	100.966	OK	78.119	64.5352	91.7028	OK	67.8074	55.8903	79.7245	OK	103.78	86.1125	121.447	OK	73.0366	60.186	85.8871	OK	38.3104	31.094
1922	chr2	88315347	88316346	+	0	NA	Intergenic	Intergenic	-30537	NM_001024457	400966	Hs.728970	NM_001024457	ENSG00000187627	RGPD1	RGP1|RGPD2|RanBP2L2	RANBP2-like and GRIP domain containing 1	protein-coding	RGPD1	-	-	RGPD1	RGPD1	TSS20224,TSS25465	chr2:87140934-87248973	-	-	5.17e-07	0	0	OK	6.72e-09	0	0.0187358	OK	0	0	0	OK	9.8e-07	0	0.0187435	OK	0	0	0	OK	5.26e-07	0
735	chr9	130283254	130284253	+	0	NA	intron (NM_001035534, intron 5 of 13)	intron (NM_001035534, intron 5 of 13)	47643	NM_022833	64855	Hs.522401	NM_022833	ENSG00000136830	FAM129B	C9orf88|MEG-3|MINERVA|OC58|bA356B19.6	family with sequence similarity 129 member B	protein-coding	FAM129B	-	-	FAM129B	FAM129B	TSS14720,TSS21710	chr9:130267616-130341286	-	-	27.8241	22.8734	32.7749	OK	27.7445	22.8732	32.6158	OK	33.4	27.6992	39.1007	OK	31.5687	26.1027	37.0347	OK	28.2587	23.3111	33.2062	OK	29.183	24.0508
3048	chr7	44835271	44837012	+	0	NA	promoter-TSS (NM_001300981)	promoter-TSS (NM_001300981)	-94	NM_021130	5478	Hs.356331	NM_021130	ENSG00000196262	PPIA	CYPA|CYPH|HEL-S-69p	peptidylprolyl isomerase A	protein-coding	PPIA	-	-	PPIA	PPIA	TSS17520	chr7:44836234-44842722	-	-	102.404	85.4722	119.336	OK	93.2528	77.7835	108.722	OK	79.086	65.8086	92.3633	OK	97.6478	81.5658	113.73	OK	124.282	103.937	144.626	OK	95.3695	79.5993
2948	chr2	189696773	189697772	+	0	NA	Intergenic	AluSp|SINE|Alu	-42441	NM_052952	116093	Hs.470892	NM_052952	ENSG00000174325	DIRC1	-	disrupted in renal carcinoma 1	protein-coding	DIRC1	-	-	DIRC1	DIRC1	TSS33044	chr2:189598464-189654831	-	-	0.0766066	0	0.232242	OK	0.0157216	0	0.108552	OK	0.0179529	0	0.112801	OK	0	0	0	OK	0	0	0	OK	0.0886829	0
6394	chr1	117209837	117210836	+	0	NA	promoter-TSS (NM_001542)	promoter-TSS (NM_001542)	41	NM_001007237	3321	Hs.171057	NM_001542	ENSG00000143061	IGSF3	EWI-3|LCDD|V8	immunoglobulin superfamily member 3	protein-coding
1271	chr8	22525552	22526551	+	0	NA	intron (NM_018688, intron 1 of 8)	intron (NM_018688, intron 1 of 8)	610	NM_018688	55909	Hs.433722	NM_018688	ENSG00000147439	BIN3	-	bridging integrator 3	protein-coding	BIN3	-	-	BIN3	BIN3	TSS28286	chr8:22462144-22526661	-	-	13.8659	7.2859	20.446	OK	19.2851	11.5765	26.9936	OK	21.8128	13.1926	30.4329	OK	23.4224	14.9043	31.9405	OK	19.0322	11.583	26.4814	OK	28.6052	19.0637
4566	chr7	5632060	5633059	+	0	NA	5' UTR (NM_003088, exon 1 of 5)	5' UTR (NM_003088, exon 1 of 5)	123	NM_003088	6624	Hs.118400	NM_003088	ENSG00000075618	FSCN1	FAN1|HSN|SNL|p55	fascin actin-bundling protein 1	protein-coding	FSCN1	-	-	FSCN1	FSCN1	TSS15887	chr7:5632435-5646287	-	-	45.7525	37.3778	54.1272	OK	25.2557	20.4248	30.0866	OK	40.5466	33.301	47.7922	OK	22.4584	18.1005	26.8163	OK	60.9278	50.3926	71.463	OK	25.8695	20.9134
344	chr5	178977273	178978272	+	0	NA	exon (NM_025158, exon 1 of 18)	exon (NM_025158, exon 1 of 18)	210	NM_025158	80230	Hs.306769	NM_025158	ENSG00000176783	RUFY1	RABIP4|ZFYVE12	RUN and FYVE domain containing 1	protein-coding	RUFY1	-	-	RUFY1	RUFY1	TSS19371,TSS25934	chr5:178977561-179037027	-	-	16.38	13.1079	19.652	OK	24.0789	19.5792	28.5787	OK	20.4936	16.5631	24.4241	OK	18.7218	15.1121	22.3314	OK	14.2292	11.3428	17.1155	OK	18.0714	14.5266
4682	chr12	118681160	118682159	+	0	NA	intron (NM_001346493, intron 4 of 22)	AluSx|SINE|Alu	-53292	NM_001346496	51347	Hs.644420	NM_016281	ENSG00000135090	TAOK3	DPK|JIK|MAP3K18|hKFC-A	TAO kinase 3	protein-coding
6577	chr17	79934877	79935876	+	0	NA	promoter-TSS (NR_045351)	promoter-TSS (NR_045351)	-46	NM_001330528	79058	Hs.298351	NM_024083	ENSG00000169696	ASPSCR1	ASPCR1|ASPL|ASPS|RCC17|TUG|UBXD9|UBXN9	ASPSCR1, UBX domain containing tether for SLC2A4	protein-coding
2103	chr11	3688285	3689284	+	0	NA	exon (NM_020402, exon 4 of 5)	exon (NM_020402, exon 4 of 5)	3830	NM_001303034	57053	Hs.732806	NM_020402	ENSG00000129749	CHRNA10	-	cholinergic receptor nicotinic alpha 10 subunit	protein-coding
2949	chr10	75038390	75039389	+	0	NA	intron (NM_145170, intron 20 of 27)	U6|snRNA|snRNA	26390	NR_134460	414245	Hs.568860	NR_038373	ENSG00000227540	DNAJC9-AS1	C10orf103|bA537A6.3	DNAJC9 antisense RNA 1	ncRNA
1710	chr16	32494634	32495633	+	0	NA	Intergenic	ALR/Alpha|Satellite|centr	192297	NM_001330066	102724127		NM_001330066	ENSG00000278848	TP53TG3F	-	TP53 target 3 family member F	protein-coding
6624	chr20	31172182	31173181	+	0	NA	exon (NM_001256798, exon 1 of 11)	exon (NM_001256798, exon 1 of 11)	194	NM_001256798	140688	Hs.516978	NM_080616	ENSG00000197183	NOL4L	C20orf112|C20orf113|dJ1184F4.2|dJ1184F4.4	nucleolar protein 4 like	protein-coding
4783	chr17	42143481	42144480	+	0	NA	5' UTR (NM_152344, exon 2 of 6)	5' UTR (NM_152344, exon 2 of 6)	1007	NM_152344	124801	Hs.355570	NM_152344	ENSG00000161654	LSM12	PNAS-135	LSM12 homolog	protein-coding	LSM12	-	-	LSM12	LSM12	TSS22086	chr17:42112002-42144987	-	-	2.40535	1.659	3.15171	OK	1.81462	1.19548	2.43376	OK	2.57815	1.7851	3.37119	OK	2.37435	1.6377	3.111	OK	2.27351	1.55865	2.98837	OK	1.75631	1.15878
2224	chr14	76848194	76849193	+	0	NA	intron (NM_004452, intron 1 of 10)	intron (NM_004452, intron 1 of 10)	11003	NM_004452	2103	Hs.435845	NM_004452	ENSG00000119715	ESRRB	DFNB35|ERR2|ERRb|ESRL2|NR3B2	estrogen related receptor beta	protein-coding	ESRRB	-	-	ESRRB	ESRRB	TSS22709	chr14:76837689-76968180	-	-	0	0	0	OK	0	0	0	OK	0	0	0	OK	0	0	0	OK	0	0	0	OK	0	0
1133	chr2	10274318	10275317	+	0	NA	Intergenic	Intergenic	-6692	NM_182626	348738	Hs.454981	NM_182626		C2orf48	-	chromosome 2 open reading frame 48	protein-coding	C2orf48	-	-	C2orf48	C2orf48	TSS21123	chr2:10281508-10351856	-	-	0.032765	0	0.100919	OK	0.021345	0	0.0896548	OK	0.0428748	0	0.135622	OK	0.209194	0.0342365	0.384151	OK	0.0208197	0	0.0893009	OK	0.0251441	0
6271	chr12	16066559	16067558	+	0	NA	intron (NM_015954, intron 1 of 8)	AluSz6|SINE|Alu	2952	NM_015954	51071	Hs.39429	NM_015954	ENSG00000023697	DERA	CGI-26|DEOC	deoxyribose-phosphate aldolase	protein-coding	DERA	-	-	DERA	DERA	TSS18251	chr12:16064105-16190315	-	-	80.9237	66.9863	94.861	OK	64.1646	52.8762	75.453	OK	64.4893	53.0986	75.8799	OK	57.7134	47.4646	67.9622	OK	62.1294	51.1834	73.0755	OK	39.857	32.444
5476	chr14	23790290	23791289	+	0	NA	exon (NM_004643, exon 1 of 7)	exon (NM_004643, exon 1 of 7)	1392	NM_004643	8106	Hs.707712	NM_004643	ENSG00000100836	PABPN1	OPMD|PAB2|PABII|PABP-2|PABP2	poly(A) binding protein nuclear 1	protein-coding	PABPN1	-	-	PABPN1	PABPN1	TSS7426	chr14:23775970-23795394	-	-	18.3104	13.3959	23.2249	OK	20.1448	14.7814	25.5082	OK	18.5925	13.5874	23.5975	OK	19.3333	14.3522	24.3143	OK	14.9107	10.5035	19.3178	OK	15.3925	11.6023
2421	chr3	150805192	150806191	+	0	NA	intron (NM_053002, intron 1 of 42)	intron (NM_053002, intron 1 of 42)	1106	NM_053002	116931	Hs.744234	NM_053002	ENSG00000144893	MED12L	NOPAR|TNRC11L|TRALP|TRALPUSH	mediator complex subunit 12 like	protein-coding	MED12L	-	-	MED12L	MED12L	TSS16866	chr3:150804584-151176497	-	-	0.0195017	0	0.0565993	OK	0.0261453	0	0.0677287	OK	0.00816992	0	0.0305791	OK	0.0181294	0	0.0526693	OK	0.0263679	0	0.0564304	OK	0.0469059	0.00504375
209	chr6	140858628	140859627	+	0	NA	Intergenic	Intergenic	-145824	NR_039675	100616180		NR_039675	ENSG00000264390	MIR4465	-	microRNA 4465	ncRNA	MIR4465	-	-	MIR4465	MIR4465	TSS2432	chr6:141004950-141005020	-	-	0	0	0	OK	0	0	0	OK	0	0	0	OK	0	0	0	OK	0	0	0	OK	0	0
2837	chr9	131709503	131710502	+	0	NA	promoter-TSS (NM_014908)	promoter-TSS (NM_014908)	10	NM_014908	22845	Hs.531563	NM_014908	ENSG00000175283	DOLK	CDG1M|DK|DK1|SEC59|TMEM15	dolichol kinase	protein-coding	DOLK	-	-	DOLK	DOLK	TSS22722	chr9:131707808-131769375	-	-	25.1753	14.1468	36.2038	OK	30.9433	20.0439	41.8428	OK	27.776	17.1208	38.4311	OK	23.5854	14.8483	32.3225	OK	24.9054	14.0153	35.7954	OK	28.7402	19.1825
4456	chr3	185654770	185655769	+	0	NA	intron (NM_004593, intron 1 of 8)	CpG	655	NM_001243879	6434	Hs.533122	NM_004593	ENSG00000136527	TRA2B	Htra2-beta|PPP1R156|SFRS10|SRFS10|TRA2-BETA|TRAN2B	transformer 2 beta homolog (Drosophila)	protein-coding
4132	chr8	107936677	107937676	+	0	NA	Intergenic	Intergenic	-154704	NM_139166	137735	Hs.374668	NM_139166	ENSG00000174429	ABRA	STARS	actin binding Rho activating protein	protein-coding	ABRA	-	-	ABRA	ABRA	TSS33655	chr8:107771710-107782472	-	-	0.0147022	0	0.0608267	OK	0.0144723	0	0.0613577	OK	0.0336226	0	0.112062	OK	0.00745002	0	0.0543454	OK	0.161416	0.0317591	0.291073	OK	0.120421	0.00919004
1118	chr1	959684	960683	+	0	NA	intron (NM_198576, intron 2 of 35)	intron (NM_198576, intron 2 of 35)	4680	NM_001305275	375790	Hs.273330	NM_198576	ENSG00000188157	AGRN	CMS8|CMSPPD	agrin	protein-coding
1575	chr21	47469003	47470002	+	0	NA	Intergenic	Intergenic	-48531	NM_001849	1292	Hs.420269	NM_001849	ENSG00000142173	COL6A2	BTHLM1|PP3610|UCMD1	collagen type VI alpha 2 chain	protein-coding	COL6A2	-	-	COL6A2	COL6A2	TSS9973	chr21:47518032-47552763	-	-	916.741	769.18	1064.3	OK	1084.33	909.924	1258.73	OK	1389.39	1165.07	1613.71	OK	1402.1	1175.49	1628.72	OK	677.088	569.571	784.605	OK	1334.14	1120.55
5916	chr11	10702715	10703714	+	0	NA	intron (NM_130385, intron 1 of 20)	MIR3|SINE|MIR	11907	NM_001100167	10335	Hs.501898	NM_130385	ENSG00000072952	MRVI1	IRAG|JAW1L	murine retrovirus integration site 1 homolog	protein-coding
5152	chr12	39665592	39666591	+	0	NA	Intergenic	Intergenic	171101	NM_001173463	55605	Hs.374201	NM_017641	ENSG00000139116	KIF21A	CFEOM1|FEOM1|FEOM3A	kinesin family member 21A	protein-coding
2428	chr17	79885183	79886182	+	0	NA	promoter-TSS (NM_002359)	promoter-TSS (NM_002359)	-23	NR_015454	92659	Hs.336958	NR_015454	ENSG00000265688	MAFG-AS1	-	MAFG antisense RNA 1 (head to head)	ncRNA	MAFG-AS1	-	-	MAFG-AS1	MAFG-AS1	TSS23025	chr17:79885704-79888629	-	-	1.6789	0.972923	2.38488	OK	1.9579	1.20268	2.71312	OK	3.41177	2.33732	4.48623	OK	3.07036	2.0615	4.07922	OK	1.37739	0.77231	1.98247	OK	4.00505	2.76058
5564	chr2	208615818	208616817	+	0	NA	intron (NM_001330218, intron 9 of 9)	AluSp|SINE|Alu	-3214	NR_039934	100616361		NR_039934	ENSG00000163249	MIR4775	-	microRNA 4775	ncRNA	MIR4775	-	-	MIR4775	MIR4775	TSS25380	chr2:208576263-208620896	-	-	0	0	0	OK	0	0	0	OK	0	0	0	OK	0	0	0	OK	0	0	0	OK	0	0
4718	chr12	68257116	68258115	+	0	NA	Intergenic	MLT1A1|LTR|ERVL-MaLR	-65400	NR_120456	101927922	Hs.450769	NR_120456	ENSG00000255772	LINC01479	HRAT39	long intergenic non-protein coding RNA 1479	ncRNA	LINC01479	-	-	LINC01479	LINC01479	TSS30160	chr12:68323014-68363797	-	-	0	0	0	OK	0.0978672	0	0.433737	OK	0.184834	0	0.595268	OK	0	0	0	OK	0	0	0	OK	0	0
4460	chr6	158451850	158452849	+	0	NA	intron (NM_003898, intron 3 of 26)	intron (NM_003898, intron 3 of 26)	14269	NM_001178088	8871	Hs.434494	NM_003898	ENSG00000078269	SYNJ2	INPP5H	synaptojanin 2	protein-coding
5080	chr5	73477362	73478361	+	0	NA	Intergenic	Intergenic	126289	NR_105009	102503429	Hs.519391	NR_105009	ENSG00000248942	LINC01335	-	long intergenic non-protein coding RNA 1335	ncRNA	LINC01335	-	-	LINC01335	LINC01335	TSS16377	chr5:73602234-73604150	-	-	0	0	0	OK	0	0	0	OK	0	0	0	OK	0	0	0	OK	0	0	0	OK	0	0
5683	chr11	62389872	62390871	+	0	NA	promoter-TSS (NM_001288721)	promoter-TSS (NM_001288721)	-724	NM_001288723	26229	Hs.502759	NM_012200	ENSG00000149541	B3GAT3	GLCATI|JDSCD|glcUAT-I	beta-1,3-glucuronyltransferase 3	protein-coding
5561	chr5	101415439	101416438	+	0	NA	Intergenic	L1PA15|LINE|L1	216315	NM_180991	353189	Hs.127648	NM_180991	ENSG00000173930	SLCO4C1	OATP-H|OATP-M1|OATP4C1|OATPX|PRO2176|SLC21A20	solute carrier organic anion transporter family member 4C1	protein-coding	SLCO4C1	-	-	SLCO4C1	SLCO4C1	TSS22998	chr5:101569691-101632253	-	-	0.010425	0	0.0338348	OK	0.0266175	0	0.068336	OK	0	0	0	OK	0	0	0	OK	0	0	0	OK	0.00389396	0
4191	chr15	94742835	94743834	+	0	NA	Intergenic	Intergenic	-92167	NR_120320	101927112	Hs.134687	NR_120320	ENSG00000259724	LINC01581	-	long intergenic non-protein coding RNA 1581	ncRNA	LINC01581	-	-	LINC01581	LINC01581	TSS24177	chr15:94443929-94651167	-	-	0	0	0	OK	0	0	0	OK	0	0	0	OK	0	0	0	OK	0	0	0	OK	0	0
600	chr5	668781	669780	+	0	NA	intron (NM_007030, intron 2 of 3)	intron (NM_007030, intron 2 of 3)	24230	NM_007030	11076	Hs.481466	NM_007030	ENSG00000171368	TPPP	TPPP/p25|TPPP1|p24|p25|p25alpha	tubulin polymerization promoting protein	protein-coding	TPPP	-	-	TPPP	TPPP	TSS13659	chr5:659976-693510	-	-	0.0606062	0.00245807	0.118754	OK	0.106237	0.0301083	0.182365	OK	0.0489271	0	0.0994412	OK	0.0668133	0.00847248	0.125154	OK	0.52166	0.326954	0.716366	OK	0.519599	0.325359
80	chr11	447944	448943	+	0	NA	intron (NM_001329548, intron 1 of 11)	intron (NM_001329548, intron 1 of 11)	175	NM_001329548	81490	Hs.12851	NM_030783	ENSG00000174915	PTDSS2	PSS2	phosphatidylserine synthase 2	protein-coding
6658	chr22	41633546	41634545	+	0	NA	exon (NM_138481, exon 3 of 6)	exon (NM_138481, exon 3 of 6)	2890	NM_138481	150356	Hs.344488	NM_138481	ENSG00000100399	CHADL	SLRR4B	chondroadherin like	protein-coding	CHADL	-	-	CHADL	CHADL	TSS29919	chr22:41601312-41636935	-	-	0.0833438	0	0.449565	OK	0.0742753	0	0.331926	OK	0.0352816	0	0.236341	OK	0.0483494	0	0.272225	OK	0.102136	0	0.430716	OK	0.0584174	0
336	chr12	6161736	6162735	+	0	NA	intron (NM_000552, intron 15 of 51)	L2c|LINE|L2	71606	NM_000552	7450	Hs.440848	NM_000552	ENSG00000110799	VWF	F8VWF|VWD	von Willebrand factor	protein-coding	VWF	-	-	VWF	VWF	TSS24990	chr12:6058039-6233836	-	-	0.0355787	0.00100449	0.070153	OK	0.0233642	0	0.0504861	OK	0.0186745	0	0.0436056	OK	0	0	0	OK	0.00918763	0	0.0316902	OK	0.0274192	0
6806	chrX	52875391	52876390	+	0	NA	Intergenic	L1PA6|LINE|L1	20442	NM_130776	170626	Hs.43879	NM_130776	ENSG00000171402	XAGE3	CT12.3a|CT12.3b|GAGED4|PLAC6|XAGE-3|pp9012	X antigen family member 3	protein-coding	XAGE3	-	-	XAGE3	XAGE3	TSS12992,TSS28603	chrX:52891557-52897119	-	-	0	0	0	OK	0	0	0	OK	0	0	0	OK	0.0782496	0	0.51248	OK	0	0	0	OK	0	0
457	chr6	41909038	41910037	+	0	NA	promoter-TSS (NM_001760)	promoter-TSS (NM_001760)	49	NM_001760	896	Hs.534307	NM_001760	ENSG00000112576	CCND3	-	cyclin D3	protein-coding	CCND3	-	-	CCND3	CCND3	TSS13819,TSS16830	chr6:41902670-42016632	-	-	143.561	119.888	167.235	OK	56.8017	46.934	66.6694	OK	108.192	90.1454	126.239	OK	54.3861	44.8606	63.9116	OK	121.247	101.083	141.411	OK	49.9812	41.0227
4998	chr15	85647988	85648987	+	0	NA	intron (NM_002605, intron 11 of 21)	intron (NM_002605, intron 11 of 21)	100031	NR_049748	642423	Hs.681665	NR_049748		LOC642423	-	golgin A2 pseudogene	pseudo	LOC642423	-	-	LOC642423	LOC642423	TSS15459,TSS5534	chr15:84860599-84898920	-	-	0	0	0	OK	0	0	0	OK	0	0	0	OK	0	0	0	OK	0	0	0	OK	0	0
1301	chr17	17585659	17586658	+	0	NA	intron (NM_030665, intron 1 of 5)	CpG	1371	NM_030665	10743	Hs.655395	NM_030665	ENSG00000108557	RAI1	SMCR|SMS	retinoic acid induced 1	protein-coding	RAI1	-	-	RAI1	RAI1	TSS22802	chr17:17584786-17740325	-	-	3.45265	2.37129	4.53402	OK	3.61516	2.29517	4.93515	OK	2.46148	1.6848	3.23815	OK	2.1349	1.10834	3.16146	OK	2.85922	1.87729	3.84115	OK	4.71878	2.98316
5247	chr7	75916551	75917550	+	0	NA	TTS (NM_001110199)	TTS (NM_001110199)	-14825	NM_001540	3315	Hs.520973	NM_001540	ENSG00000106211	HSPB1	CMT2F|HEL-S-102|HMN2B|HS.76067|HSP27|HSP28|Hsp25|SRP27	heat shock protein family B (small) member 1	protein-coding	HSPB1	-	-	HSPB1	HSPB1	TSS21342	chr7:75931874-75933614	-	-	378.182	313.438	442.925	OK	578.905	483.755	674.055	OK	399.765	333.306	466.225	OK	477.13	398.575	555.685	OK	863.289	721.853	1004.73	OK	1008.63	846.667
383	chr7	66119357	66120356	+	0	NA	intron (NR_110037, intron 1 of 3)	CpG	350	NR_110037	100996437	Hs.667408	NR_110037		LOC100996437	-	uncharacterized LOC100996437	ncRNA	LOC100996437	-	-	LOC100996437	LOC100996437	TSS1536	chr7:66119505-66134589	-	-	1.71683	0.70835	2.72531	OK	0.955155	0.25921	1.6511	OK	0.844726	0.207661	1.48179	OK	0.748269	0.131684	1.36485	OK	2.3589	1.19755	3.52024	OK	0.916686	0.225305
4945	chr5	34215457	34216456	+	0	NA	Intergenic	AluJr|SINE|Alu	-91323	NR_037951	100534612	Hs.171929	NR_037951	ENSG00000273294	C1QTNF3-AMACR	-	C1QTNF3-AMACR readthrough (NMD candidate)	ncRNA	C1QTNF3-AMACR	-	-	C1QTNF3-AMACR	C1QTNF3-AMACR	TSS1394	chr5:33987090-34124633	-	-	1.15e-20	0	0.0325829	OK	6.83e-18	0	0.0338991	OK	0.0238225	0	0.129215	OK	0.0069901	0	0.0546967	OK	0.0664632	0	0.282443	OK	0.00369383	0
2532	chr9	140114243	140115242	+	0	NA	TTS (NM_001144028)	TTS (NM_001144028)	1033	NM_031297	727800	Hs.512767	NM_031297	ENSG00000212864	RNF208	-	ring finger protein 208	protein-coding	RNF208	-	-	RNF208	RNF208	TSS20752	chr9:140114698-140115775	-	-	0	0	0	OK	0.108066	0	0.340131	OK	0.102405	0	0.326886	OK	0.0264397	0	0.158868	OK	0	0	0	OK	0.129571	0
3817	chr8	119220947	119221946	+	0	NA	intron (NM_001101676, intron 4 of 4)	intron (NM_001101676, intron 4 of 4)	-97388	NM_000127	2131	Hs.492618	NM_000127	ENSG00000182197	EXT1	EXT|LGCR|LGS|TRPS2|TTV	exostosin glycosyltransferase 1	protein-coding	EXT1	-	-	EXT1	EXT1	TSS12229	chr8:118811601-119124058	-	-	56.1158	46.6197	65.6119	OK	24.8282	20.257	29.3995	OK	17.7612	14.4389	21.0836	OK	11.4609	9.16983	13.7519	OK	18.4964	15.0304	21.9625	OK	21.3347	17.4325
6449	chr11	77033739	77034738	+	0	NA	3' UTR (NM_002576, exon 15 of 15)	3' UTR (NM_002576, exon 15 of 15)	-35775	NM_182833	220032	Hs.249795	NM_182833	ENSG00000178795	GDPD4	GDE6	glycerophosphodiester phosphodiesterase domain containing 4	protein-coding	GDPD4	-	-	GDPD4	GDPD4	TSS22986	chr11:76927602-76998463	-	-	0	0	0	OK	0	0	0	OK	0	0	0	OK	0	0	0	OK	0	0	0	OK	0	0
1873	chr8	26434194	26435193	+	0	NA	promoter-TSS (NM_001386)	promoter-TSS (NM_001386)	-647	NM_001386	1808	Hs.593187	NM_001386	ENSG00000092964	DPYSL2	CRMP-2|CRMP2|DHPRP2|DRP-2|DRP2|N2A3|ULIP-2|ULIP2	dihydropyrimidinase like 2	protein-coding	DPYSL2	-	-	DPYSL2	DPYSL2	TSS11896,TSS32143,TSS8714	chr8:26371708-26515693	-	-	81.5765	68.3139	94.8391	OK	118.076	99.1744	136.978	OK	117.871	98.8094	136.932	OK	122.637	103.035	142.239	OK	75.4731	63.1902	87.7559	OK	118.272	99.2847
2497	chr8	106331040	106332039	+	0	NA	intron (NM_012082, intron 1 of 7)	CpG	392	NM_012082	23414	Hs.431009	NM_012082	ENSG00000169946	ZFPM2	DIH3|FOG2|SRXY9|ZC2HC11B|ZNF89B|hFOG-2	zinc finger protein, FOG family member 2	protein-coding	ZFPM2	-	-	ZFPM2	ZFPM2	TSS29148	chr8:106331146-107072731	-	-	0.00426683	0	0.0323546	OK	0.0125499	0	0.0596889	OK	0.00445503	0	0.0326897	OK	0.0123568	0	0.0591006	OK	0.00785392	0	0.0473248	OK	0.0182334	0
3651	chr10	90833579	90834578	+	0	NA	Intergenic	Intergenic	-10910	NR_039827	100616192		NR_039827	ENSG00000265375	MIR4679-2	-	microRNA 4679-2	ncRNA	MIR4679-2	-	-	MIR4679-2	MIR4679-2	TSS13328	chr10:90823091-90823168	-	-	0	0	0	OK	0	0	0	OK	0	0	0	OK	0	0	0	OK	0	0	0	OK	0	0
6711	chr6	74679328	74680327	+	0	NA	Intergenic	Intergenic	-99340	NR_110856	101928516	Hs.384600	NR_110856	ENSG00000223786	LOC101928516	-	uncharacterized LOC101928516	ncRNA	LOC101928516	-	-	LOC101928516	LOC101928516	TSS13982	chr6:74779166-75400443	-	-	0	0	0	OK	0.0538374	0	0.281195	OK	0	0	0	OK	0	0	0	OK	0	0	0	OK	0	0
4157	chr10	102820406	102821739	+	0	NA	promoter-TSS (NR_135067)	promoter-TSS (NR_135067)	73	NM_030929	81621	Hs.534859	NM_030929	ENSG00000107821	KAZALD1	BONO1|FKSG28|FKSG40|IGFBP-rP10	Kazal type serine peptidase inhibitor domain 1	protein-coding	KAZALD1	-	-	KAZALD1	KAZALD1	TSS5878	chr10:102820998-102825351	-	-	12.8973	10.1051	15.6894	OK	8.2245	6.29441	10.1546	OK	25.8656	20.9807	30.7506	OK	15.2504	12.093	18.4078	OK	6.25972	4.69616	7.82329	OK	11.4694	8.94737
92	chr7	116593885	116594884	+	0	NA	promoter-TSS (NR_002330)	promoter-TSS (NR_002330)	4	NR_002330	93653	Hs.597516	NR_002330	ENSG00000227199	ST7-AS1	ST7AS1|ST7OT1	ST7 antisense RNA 1	ncRNA	ST7-AS1	-	-	ST7-AS1	ST7-AS1	TSS3037	chr7:116592500-116870075	-	-	0.213333	0	1.06944	OK	0.53662	0	1.7712	OK	0.094264	0	0.569554	OK	0.14352	0	0.737	OK	0.101923	0	0.746375	OK	0.209585	0
5354	chr5	179034078	179035077	+	0	NA	intron (NM_001040452, intron 16 of 17)	intron (NM_001040452, intron 16 of 17)	-3835	NR_110560	101928445	Hs.663255	NR_110560	ENSG00000244945	LOC101928445	-	uncharacterized LOC101928445	ncRNA	LOC101928445	-	-	LOC101928445	LOC101928445	TSS24977	chr5:178977561-179037027	-	-	0.0445078	0	0.243678	OK	0.0552421	0	0.30176	OK	0.0790577	0	0.349707	OK	0.0209015	0	0.17103	OK	0.0577838	0	0.275243	OK	0.0620677	0
4791	chr8	41604809	41605808	+	0	NA	intron (NM_000037, intron 2 of 42)	intron (NM_000037, intron 2 of 42)	49832	NM_000037	286	Hs.654438	NM_000037	ENSG00000029534	ANK1	ANK|SPH1|SPH2	ankyrin 1	protein-coding	ANK1	-	-	ANK1	ANK1	TSS16564,TSS24389,TSS24675	chr8:41510743-41754280	-	-	1.235	0.892277	1.57773	OK	1.09305	0.785934	1.40016	OK	1.0131	0.723205	1.303	OK	1.28823	0.936806	1.63965	OK	2.67526	2.06601	3.2845	OK	2.71416	2.1034
3687	chr3	128267904	128268903	+	0	NA	Intergenic	Intergenic	26526	NR_125802	23434	Hs.194283	NM_007354	ENSG00000198685	LINC01565	C3orf27|GR6	long intergenic non-protein coding RNA 1565	ncRNA
1212	chr8	143820553	143821552	+	0	NA	Intergenic	CpG	2777	NM_020427	57152	Hs.103505	NM_020427	ENSG00000126233	SLURP1	ANUP|ARS|ArsB|LY6LS|MDM	secreted LY6/PLAUR domain containing 1	protein-coding	SLURP1	-	-	SLURP1	SLURP1	TSS21665	chr8:143822361-143823829	-	-	0	0	0	OK	0	0	0	OK	0	0	0	OK	0	0	0	OK	0	0	0	OK	0	0
2253	chr14	67981522	67982521	+	0	NA	promoter-TSS (NM_182526)	promoter-TSS (NM_182526)	0	NM_182526	161145	Hs.509707	NM_182526	ENSG00000198133	TMEM229B	C14orf83	transmembrane protein 229B	protein-coding	TMEM229B	-	-	TMEM229B	TMEM229B	TSS21475	chr14:67936982-67982021	-	-	0.284278	0.126602	0.441954	OK	0.4123	0.217745	0.606855	OK	0.00544402	0	0.0372635	OK	0.0933102	0.00744739	0.179173	OK	0.13553	0.0311164	0.239943	OK	0.836362	0.53206
2787	chr17	6939136	6940135	+	0	NA	5' UTR (NM_201566, exon 1 of 4)	5' UTR (NM_201566, exon 1 of 4)	241	NM_201566	201232	Hs.448010	NM_201566	ENSG00000174327	SLC16A13	MCT13	solute carrier family 16 member 13	protein-coding	SLC16A13	-	-	SLC16A13	SLC16A13	TSS18644	chr17:6939393-6943440	-	-	0.0938791	0	0.217476	OK	0.31114	0.0505017	0.571778	OK	0.0884243	0	0.23041	OK	0.159572	0	0.328752	OK	0.183531	0	0.388976	OK	0.221422	0.00935388
2433	chr6	33581193	33582192	+	0	NA	Intergenic	Intergenic	-7464	NM_002224	3710	Hs.65758	NM_002224	ENSG00000096433	ITPR3	IP3R|IP3R3	inositol 1,4,5-trisphosphate receptor type 3	protein-coding	ITPR3	-	-	ITPR3	ITPR3	TSS19308	chr6:33589155-33664348	-	-	10.4974	8.64471	12.3501	OK	12.9194	10.7008	15.1379	OK	5.76323	4.69249	6.83398	OK	6.01888	4.89757	7.1402	OK	4.61239	3.71546	5.50932	OK	8.91066	7.32352
1477	chr1	3222741	3223740	+	0	NA	intron (NM_199454, intron 3 of 16)	L1MB7|LINE|L1	-147907	NM_014448	27237	Hs.87435	NM_014448	ENSG00000130762	ARHGEF16	GEF16|NBR	Rho guanine nucleotide exchange factor 16	protein-coding	ARHGEF16	-	-	ARHGEF16	ARHGEF16	TSS18135	chr1:3371146-3397677	-	-	0.00879805	0	0.0563841	OK	0.0963556	0	0.205171	OK	0.0166042	0	0.0629693	OK	0.0434698	0	0.121555	OK	0.135882	0	0.272831	OK	0.0408579	0
1164	chr5	76372864	76373863	+	0	NA	exon (NM_001329564, exon 2 of 2)	exon (NM_001329564, exon 2 of 2)	3033	NR_003014	677828	Hs.693249	NR_003014	ENSG00000238961	SNORA47	HBI-115	small nucleolar RNA, H/ACA box 47	snoRNA	SNORA47	-	-	SNORA47	SNORA47	TSS16193	chr5:76372531-76444176	-	-	0	0	0	OK	0	0	0	OK	0	0	0	OK	0	0	0	OK	0	0	0	OK	0	0
5450	chr18	73336178	73337177	+	0	NA	Intergenic	Intergenic	87681	NR_134646	100505853	Hs.146758	NR_134646	ENSG00000261194	LINC01898	-	long intergenic non-protein coding RNA 1898	ncRNA
2824	chr16	74686658	74687657	+	0	NA	intron (NM_018124, intron 2 of 12)	AluJb|SINE|Alu	13622	NM_018124	55159	Hs.567525	NM_018124	ENSG00000168411	RFWD3	RNF201	ring finger and WD repeat domain 3	protein-coding	RFWD3	-	-	RFWD3	RFWD3	TSS19973	chr16:74655296-74700779	-	-	34.1081	28.4141	39.8022	OK	14.1425	11.6005	16.6845	OK	18.5668	15.3213	21.8123	OK	11.8366	9.66306	14.0102	OK	20.9043	17.2881	24.5206	OK	8.44682	6.82901
6404	chr10	30024339	30025338	+	0	NA	promoter-TSS (NM_001323600)	promoter-TSS (NM_001323600)	15	NM_001323600	6840	Hs.499209	NM_003174	ENSG00000197321	SVIL	-	supervillin	protein-coding
5777	chr9	120530754	120531753	+	0	NA	Intergenic	MER117|DNA|hAT-Charlie	64800	NM_138554	7099	Hs.174312	NM_003266	ENSG00000136869	TLR4	ARMD10|CD284|TLR-4|TOLL	toll like receptor 4	protein-coding
4597	chr20	49150882	49151881	+	0	NA	intron (NM_001278618, intron 1 of 8)	AluJr|SINE|Alu	24523	NM_001278618	5770	Hs.417549	NM_002827	ENSG00000196396	PTPN1	PTP1B	protein tyrosine phosphatase, non-receptor type 1	protein-coding
505	chr14	89297312	89298311	+	0	NA	intron (NM_198310, intron 2 of 13)	MER66C|LTR|ERV1	7314	NM_001288782	123016	Hs.303055	NM_144596	ENSG00000165533	TTC8	BBS8|RP51	tetratricopeptide repeat domain 8	protein-coding
6310	chr6	49626483	49627482	+	0	NA	Intergenic	AluJb|SINE|Alu	-22395	NM_000324	6005	Hs.120950	NM_000324	ENSG00000112077	RHAG	CD241|OHS|OHST|RH2|RH50A|Rh50|Rh50GP|SLC42A1	Rh-associated glycoprotein	protein-coding	RHAG	-	-	RHAG	RHAG	TSS30958	chr6:49572889-49604587	-	-	0	0	0	OK	0	0	0	OK	0.0109488	0	0.0780034	OK	0	0	0	OK	0	0	0	OK	0	0
2739	chr1	230276299	230277298	+	0	NA	intron (NM_004481, intron 1 of 15)	intron (NM_004481, intron 1 of 15)	73856	NM_004481	2590	Hs.743964	NM_004481	ENSG00000143641	GALNT2	GalNAc-T2	polypeptide N-acetylgalactosaminyltransferase 2	protein-coding	GALNT2	-	-	GALNT2	GALNT2	TSS22346,TSS9482	chr1:230193535-230417876	-	-	39.2319	32.1596	46.3041	OK	44.2532	36.6427	51.8637	OK	40.493	33.6175	47.3686	OK	40.8119	33.0852	48.5387	OK	37.4591	30.693	44.2251	OK	41.2602	33.7649
670	chr3	186284417	186285416	+	0	NA	intron (NM_001134415, intron 1 of 7)	CpG	227	NM_018138	55171	Hs.518469	NM_018138	ENSG00000113838	TBCCD1	-	TBCC domain containing 1	protein-coding	TBCCD1	-	-	TBCCD1	TBCCD1	TSS1835,TSS8151	chr3:186263855-186288332	-	-	15.0586	12.0853	18.0319	OK	14.7033	11.791	17.6156	OK	16.7605	13.517	20.004	OK	15.0406	12.074	18.0072	OK	15.0498	12.0988	18.0009	OK	9.35565	7.37803
1094	chr11	69064381	69065380	+	0	NA	TTS (NM_001293296)	TTS (NM_001293296)	3275	NM_001300924	26579	Hs.523848	NM_138768	ENSG00000172927	MYEOV	OCIM	myeloma overexpressed	protein-coding
419	chr1	894702	895701	+	0	NA	promoter-TSS (NM_015658)	promoter-TSS (NM_015658)	-522	NM_015658	26155	Hs.405987	NM_015658	ENSG00000188976	NOC2L	NET15|NET7|NIR|PPP1R112	NOC2 like nucleolar associated transcriptional repressor	protein-coding	NOC2L	-	-	NOC2L	NOC2L	TSS9465	chr1:861120-894679	-	-	58.1286	48.1668	68.0904	OK	39.7851	32.7823	46.7879	OK	61.6348	51.214	72.0555	OK	52.2139	43.2574	61.1704	OK	60.0528	49.8412	70.2644	OK	43.8879	36.1893
995	chr19	46295304	46296303	+	0	NA	exon (NM_004943, exon 1 of 5)	exon (NM_004943, exon 1 of 5)	257	NM_004943	1762	Hs.515474	NM_004943	ENSG00000185800	DMWD	D19S593E|DMR-N9|DMRN9|gene59	dystrophia myotonica, WD repeat containing	protein-coding	DMWD	-	-	DMWD	DMWD	TSS16804	chr19:46286263-46296060	-	-	6.66838	5.06827	8.2685	OK	7.355	5.68996	9.02003	OK	2.21042	1.55758	2.86325	OK	2.39778	1.68908	3.10649	OK	3.33093	2.40418	4.25769	OK	4.61363	3.45731
837	chr11	9685033	9686032	+	0	NA	promoter-TSS (NM_001297714)	promoter-TSS (NM_001297714)	-92	NM_001297714	23075	Hs.153026	NM_015055	ENSG00000133789	SWAP70	HSPC321|SWAP-70	SWAP switching B-cell complex subunit 70	protein-coding
2015	chr3	151986018	151987017	+	0	NA	non-coding (NR_027037, exon 2 of 2)	non-coding (NR_027037, exon 2 of 2)	260	NM_207292	4154	Hs.201858	NM_021038	ENSG00000152601	MBNL1	EXP|MBNL	muscleblind like splicing regulator 1	protein-coding
6066	chr1	38530021	38531020	+	0	NA	Intergenic	Intergenic	-18070	NM_002699	5453	Hs.1837	NM_002699	ENSG00000185668	POU3F1	OCT6|OTF6|SCIP	POU class 3 homeobox 1	protein-coding	POU3F1	-	-	POU3F1	POU3F1	TSS33361	chr1:38509522-38512450	-	-	0	0	0	OK	0.0134838	0	0.0659541	OK	0	0	0	OK	0	0	0	OK	0	0	0	OK	0.0304855	0
4521	chr2	161126271	161127270	+	0	NA	intron (NR_103775, intron 1 of 1)	CpG	1636	NR_103775	100505984	Hs.729532	NR_103775	ENSG00000115221	LOC100505984	-	uncharacterized LOC100505984	ncRNA	LOC100505984	-	-	LOC100505984	LOC100505984	TSS14289	chr2:161114229-161128406	-	-	0	0	0	OK	0.0899929	0	0.406133	OK	0	0	0	OK	0	0	0	OK	0	0	0	OK	0.0993645	0
625	chr10	71905433	71906432	+	0	NA	exon (NM_001040273, exon 1 of 2)	exon (NM_001040273, exon 1 of 2)	564	NR_073594	219743	Hs.533655	NM_173555	ENSG00000156521	TYSND1	NET41	trypsin domain containing 1	protein-coding
149	chr4	13986649	13987648	+	0	NA	Intergenic	L2a|LINE|L2	-126444	NR_033931	152742	Hs.135435	NR_033931	ENSG00000248698	LINC01085	-	long intergenic non-protein coding RNA 1085	ncRNA	LINC01085	-	-	LINC01085	LINC01085	TSS32373	chr4:14113591-14141676	-	-	10.5545	8.21949	12.8895	OK	19.5125	15.6082	23.4169	OK	8.54962	6.5307	10.5685	OK	9.84579	7.62909	12.0625	OK	9.59266	7.42555	11.7598	OK	5.64137	4.21053
3208	chr12	45492220	45493219	+	0	NA	Intergenic	Intergenic	-33525	NR_026583	83956	Hs.650500	NM_032032		RACGAP1P	FKSG42	Rac GTPase activating protein 1 pseudogene	pseudo
3839	chr7	51039881	51040880	+	0	NA	Intergenic	L1MC4a|LINE|L1	-179221	NM_001001555	2887	Hs.164060	NM_005311	ENSG00000106070	GRB10	GRB-IR|Grb-10|IRBP|MEG1|RSS	growth factor receptor bound protein 10	protein-coding
6706	chr6	31865077	31866076	+	0	NA	promoter-TSS (NM_001282457).3	promoter-TSS (NM_001282457).3	14	NM_001282457	717	Hs.408903	NM_000063	ENSG00000166278	C2	ARMD14|CO2	complement C2	protein-coding
6398	chr1	234613740	234614739	+	0	NA	exon (NM_005646, exon 1 of 30)	exon (NM_005646, exon 1 of 30)	610	NM_005646	6894	Hs.498115	NM_005646	ENSG00000059588	TARBP1	TRM3|TRP-185|TRP185	TAR (HIV-1) RNA binding protein 1	protein-coding	TARBP1	-	-	TARBP1	TARBP1	TSS22825	chr1:234527058-234614849	-	-	1.38178	0.984831	1.77873	OK	1.20996	0.843844	1.57608	OK	1.23417	0.858652	1.60969	OK	1.16091	0.807493	1.51433	OK	0.756395	0.494786	1.01801	OK	0.774578	0.508305
406	chr22	18483757	18484756	+	0	NA	intron (NM_015241, intron 1 of 31)	CpG	-20529	NR_030378	693233		NR_030378	ENSG00000207780	MIR648	MIRN648|hsa-mir-648	microRNA 648	ncRNA	MIR648	-	-	MIR648	MIR648	TSS27053	chr22:18270415-18507325	-	-	0	0	0	OK	0	0	0	OK	0	0	0	OK	0	0	0	OK	0	0	0	OK	0	0
2289	chr10	45352859	45353858	+	0	NA	intron (NR_033842, intron 2 of 7)	intron (NR_033842, intron 2 of 7)	-53406	NM_001123376	643236	Hs.292788	NM_001123376	ENSG00000187783	TMEM72	C10orf127|KSP37	transmembrane protein 72	protein-coding	TMEM72	-	-	TMEM72	TMEM72	TSS8540	chr10:45306471-45455137	-	-	0	0	0	OK	0	0	0	OK	0	0	0	OK	0.026649	0	0.0889501	OK	0	0	0	OK	0	0
4798	chr8	143858187	143859186	+	0	NA	promoter-TSS (NM_177476)	promoter-TSS (NM_177476)	58	NM_177477	66004	Hs.158665	NM_023946	ENSG00000180155	LYNX1	SLURP2	Ly6/neurotoxin 1	protein-coding
3283	chr17	36991146	36992145	+	0	NA	intron (NM_001080465, intron 2 of 2)	intron (NM_001080465, intron 2 of 2)	5997	NM_001080465	388381	Hs.250182	NM_001080465	ENSG00000275489	C17orf98	-	chromosome 17 open reading frame 98	protein-coding	C17orf98	-	-	C17orf98	C17orf98	TSS17690	chr17:36991340-36997642	-	-	0	0	0	OK	0	0	0	OK	0	0	0	OK	0	0	0	OK	0	0	0	OK	0	0
2312	chr16	89350922	89351921	+	0	NA	exon (NM_001256182, exon 10 of 14)	exon (NM_001256182, exon 10 of 14)	-11115	NR_136339	105371414	Hs.657381	NR_136339		LOC105371414	-	uncharacterized LOC105371414	ncRNA
19	chr7	130131609	130132608	+	0	NA	5' UTR (NM_001253900, exon 1 of 12)	5' UTR (NM_001253900, exon 1 of 12)	209	NM_001253900	4232	Hs.270978	NM_002402	ENSG00000106484	MEST	PEG1	mesoderm specific transcript	protein-coding
3096	chr8	145571967	145572966	+	0	NA	Intergenic	AluY|SINE|Alu	6125	NM_001252404	340393	Hs.122231	NM_001252402	ENSG00000261587	TMEM249	C8ORFK29	transmembrane protein 249	protein-coding
3637	chr8	63984163	63985162	+	0	NA	intron (NM_000370, intron 2 of 4)	intron (NM_000370, intron 2 of 4)	13950	NM_000370	7274	Hs.69049	NM_000370	ENSG00000137561	TTPA	ATTP|AVED|TTP1|alphaTTP	alpha tocopherol transfer protein	protein-coding	TTPA	-	-	TTPA	TTPA	TSS10334	chr8:63972047-63998612	-	-	2.3376	1.63798	3.03722	OK	1.39901	0.892626	1.90539	OK	0.454503	0.192325	0.716681	OK	0.489075	0.226643	0.751507	OK	1.1947	0.7447	1.6447	OK	0.111962	0
1030	chr6	79787157	79788156	+	0	NA	intron (NM_017934, intron 1 of 39)	CpG	359	NM_017934	55023	Hs.511817	NM_017934	ENSG00000146247	PHIP	BRWD2|DCAF14|WDR11|ndrp	pleckstrin homology domain interacting protein	protein-coding	PHIP	-	-	PHIP	PHIP	TSS9811	chr6:79644135-79788011	-	-	4.85406	3.9669	5.74122	OK	4.77469	3.8896	5.65978	OK	6.07747	4.97229	7.18264	OK	6.04955	4.96021	7.13889	OK	4.44351	3.61445	5.27257	OK	4.34935	3.53947
365	chr12	51908391	51909390	+	0	NA	3' UTR (NM_001258401, exon 25 of 25)	3' UTR (NM_001258401, exon 25 of 25)	-76130	NM_001177984	6334	Hs.436550	NM_014191	ENSG00000196876	SCN8A	BFIS5|CERIII|CIAT|EIEE13|MED|NaCh6|Nav1.6|PN4	sodium voltage-gated channel alpha subunit 8	protein-coding
2730	chr1	154155050	154156049	+	0	NA	non-coding (NR_103461, exon 1 of 8)	non-coding (NR_103461, exon 1 of 8)	176	NM_153649	7170	Hs.535581	NM_152263	ENSG00000143549	TPM3	CAPM1|CFTD|HEL-189|HEL-S-82p|NEM1|OK/SW-cl.5|TM-5|TM3|TM30|TM30nm|TM5|TPMsk3|TRK|hscp30	tropomyosin 3	protein-coding
763	chr15	41136407	41137406	+	0	NA	exon (NM_001032367, exon 1 of 10)	exon (NM_001032367, exon 1 of 10)	263	NM_001032367	6692	Hs.233950	NM_003710	ENSG00000166145	SPINT1	HAI|HAI1|MANSC2	serine peptidase inhibitor, Kunitz type 1	protein-coding
3255	chr18	153411	154410	+	0	NA	Intergenic	AluSx|SINE|Alu	-4573	NM_001037334	9097	Hs.464416	NM_005151	ENSG00000101557	USP14	TGT	ubiquitin specific peptidase 14	protein-coding
3332	chr6	11650155	11651154	+	0	NA	Intergenic	Intergenic	112194	NM_001100829	100113407	Hs.146317	NM_001100829	ENSG00000205269	TMEM170B	-	transmembrane protein 170B	protein-coding	TMEM170B	-	-	TMEM170B	TMEM170B	TSS12081	chr6:11538459-11583757	-	-	0.617911	0.433413	0.80241	OK	0.456333	0.30208	0.610587	OK	0.163081	0.0790946	0.247068	OK	0.0997794	0.0390471	0.160512	OK	0.215889	0.121704	0.310073	OK	0.0802838	0.0280914
4632	chr5	15628109	15629108	+	0	NA	intron (NM_001278317, intron 2 of 3)	intron (NM_001278317, intron 2 of 3)	-13497	NR_109945	101929472	Hs.662664	NR_109945		CTD-2350J17.1	-	uncharacterized LOC101929472	ncRNA
2021	chr1	227053367	227054366	+	0	NA	Intergenic	AluY|SINE|Alu	-4407	NM_012486	5664	Hs.25363	NM_000447	ENSG00000143801	PSEN2	AD3L|AD4|CMD1V|PS2|STM2	presenilin 2	protein-coding
5948	chr20	47894811	47895810	+	0	NA	promoter-TSS (NR_002433)	promoter-TSS (NR_002433)	131	NR_036659	441951	Hs.356766	NR_003604	ENSG00000177410	ZFAS1	C20orf199|HSUP1|HSUP2|NCRNA00275|ZNFX1-AS1	ZNFX1 antisense RNA 1	ncRNA
3430	chr2	43196606	43197605	+	0	NA	Intergenic	Intergenic	69577	NR_110585	102723854	Hs.570165	NR_110585	ENSG00000231826	LINC01819	-	long intergenic non-protein coding RNA 1819	ncRNA
4590	chr11	118798640	118799639	+	0	NA	Intergenic	Intergenic	-17526	NM_182557	283149	Hs.414740	NM_182557	ENSG00000186174	BCL9L	BCL9-2|DLNB11	B-cell CLL/lymphoma 9-like	protein-coding	BCL9L	-	-	BCL9L	BCL9L	TSS3825	chr11:118754474-118781613	-	-	1.55058	1.14003	1.96113	OK	1.64652	1.22969	2.06335	OK	1.27485	0.937123	1.61257	OK	1.32386	0.970646	1.67708	OK	1.62872	1.21289	2.04454	OK	2.94437	2.28292
3318	chr10	48585536	48586535	+	0	NA	Intergenic	Intergenic	-146897	NM_004962	2662	Hs.2171	NM_004962	ENSG00000266524	GDF10	BIP|BMP-3b|BMP3B	growth differentiation factor 10	protein-coding	GDF10	-	-	GDF10	GDF10	TSS1172	chr10:48425787-48439138	-	-	0	0	0	OK	0	0	0	OK	0	0	0	OK	0	0	0	OK	0	0	0	OK	0	0
5193	chr20	5750451	5751450	+	0	NA	intron (NM_001303477, intron 2 of 3)	Tigger7|DNA|TcMar-Tigger	19917	NM_001303478	149840	Hs.529340	NM_152504	ENSG00000171984	C20orf196	-	chromosome 20 open reading frame 196	protein-coding
570	chr18	19283764	19284763	+	0	NA	intron (NM_138340, intron 1 of 8)	CpG	503	NM_138340	171586	Hs.397978	NM_138340	ENSG00000158201	ABHD3	LABH3	abhydrolase domain containing 3	protein-coding	ABHD3	-	-	ABHD3	ABHD3	TSS13479,TSS487	chr18:19230857-19284766	-	-	12.4583	9.75743	15.1592	OK	12.046	9.40086	14.6911	OK	15.2118	12.0088	18.4148	OK	20.2056	16.1935	24.2177	OK	11.6363	9.10406	14.1685	OK	11.3109	8.81106
3123	chr11	64138355	64139354	+	0	NA	exon (NM_001318361, exon 17 of 17)	exon (NM_001318361, exon 17 of 17)	2780	NR_031602	100302280		NR_031602	ENSG00000221273	MIR1237	MIRN1237|hsa-mir-1237	microRNA 1237	ncRNA	MIR1237	-	-	MIR1237	MIR1237	TSS13106	chr11:64126624-64139687	-	-	0	0	0	OK	0	0	0	OK	0	0	0	OK	0	0	0	OK	0	0	0	OK	0	0
1880	chr11	88249041	88250040	+	0	NA	intron (NR_049724, intron 4 of 5)	intron (NR_049724, intron 4 of 5)	11796	NR_049724	100873989	Hs.616625	NR_049724	ENSG00000255082	GRM5-AS1	-	GRM5 antisense RNA 1	ncRNA	GRM5-AS1	-	-	GRM5-AS1	GRM5-AS1	TSS26081	chr11:88237743-88796846	-	-	0	0	0	OK	0.00430536	0	0.031455	OK	0	0	0	OK	0	0	0	OK	0	0	0	OK	0.00502794	0
5191	chr6	26198898	26199897	+	0	NA	promoter-TSS (NM_003522)	promoter-TSS (NM_003522)	124	NM_003530	8351	Hs.532144	NM_003530	ENSG00000197409	HIST1H3D	H3/b|H3FB	histone cluster 1 H3 family member d	protein-coding	HIST1H3D	-	-	HIST1H3D	HIST1H3D	TSS33255	chr6:26197011-26199521	-	-	16.2483	11.0605	21.436	OK	13.6515	8.98481	18.3182	OK	15.6109	10.995	20.2268	OK	28.7046	21.196	36.2132	OK	6.53461	3.5294	9.53982	OK	6.34293	3.95747
3761	chr1	94293174	94294173	+	0	NA	intron (NM_001261408, intron 2 of 13)	AluJo|SINE|Alu	-18715	NR_030621	100126348		NR_030621	ENSG00000211575	MIR760	MIRN760|hsa-mir-760|mir-760	microRNA 760	ncRNA	MIR760	-	-	MIR760	MIR760	TSS33832	chr1:94027297-94312706	-	-	0	0	0	OK	0	0	0	OK	0	0	0	OK	0	0	0	OK	0	0	0	OK	0	0
252	chr15	81068762	81069761	+	0	NA	Intergenic	Intergenic	-2423	NM_001293298	57214	Hs.459088	NM_018689	ENSG00000103888	CEMIP	CCSP1|HYBID|KIAA1199|TMEM2L	cell migration inducing hyaluronan binding protein	protein-coding
6684	chr4	49272603	49273602	+	0	NA	Intergenic	Intergenic	284443	NM_001286791	80157	Hs.479703	NM_025087	ENSG00000109182	CWH43	CWH43-C	cell wall biogenesis 43 C-terminal homolog	protein-coding
4883	chr12	49931339	49932338	+	0	NA	Intergenic	CpG	-1102	NM_012284	23416	Hs.64064	NM_012284	ENSG00000135519	KCNH3	BEC1|ELK2|Kv12.2	potassium voltage-gated channel subfamily H member 3	protein-coding	KCNH3	-	-	KCNH3	KCNH3	TSS31069	chr12:49932939-49961928	-	-	0.00646673	0	0.0681305	OK	0.00639947	0	0.0684705	OK	0.0185198	0	0.125586	OK	0.0245256	0	0.160326	OK	0.00651814	0	0.0673297	OK	0	0
4063	chr5	82981215	82982214	+	0	NA	intron (NM_001884, intron 1 of 4)	7SK|RNA|RNA	35182	NM_001884	1404	Hs.2799	NM_001884	ENSG00000145681	HAPLN1	CRT1|CRTL1	hyaluronan and proteoglycan link protein 1	protein-coding	HAPLN1	-	-	HAPLN1	HAPLN1	TSS8421	chr5:82934016-83016896	-	-	0	0	0	OK	0	0	0	OK	0	0	0	OK	0.00438939	0	0.0320047	OK	0	0	0	OK	0	0
3389	chr11	65479245	65480244	+	0	NA	exon (NM_006388, exon 1 of 14)	exon (NM_006388, exon 1 of 14)	271	NM_182710	10524	Hs.397010	NM_006388	ENSG00000172977	KAT5	ESA1|HTATIP|HTATIP1|PLIP|TIP|TIP60|ZC2HC5|cPLA2	lysine acetyltransferase 5	protein-coding
883	chr9	139939862	139940861	+	0	NA	exon (NM_015392, exon 1 of 9)	exon (NM_015392, exon 1 of 9)	315	NM_015392	56654	Hs.719906	NM_015392	ENSG00000107281	NPDC1	CAB|CAB-|CAB-1|CAB1|NPDC-1	neural proliferation, differentiation and control 1	protein-coding	NPDC1	-	-	NPDC1	NPDC1	TSS15711	chr9:139933908-139940676	-	-	27.6802	21.589	33.7715	OK	33.5497	26.7052	40.3942	OK	33.8657	27.0684	40.6629	OK	27.2485	21.4813	33.0158	OK	35.6043	28.3002	42.9084	OK	45.6442	36.7118
4805	chr19	56121063	56122062	+	0	NA	Intergenic	L1M4|LINE|L1	-3397	NM_001195605	100507290	Hs.729114	NM_001195605	ENSG00000261221	ZNF865	-	zinc finger protein 865	protein-coding	ZNF865	-	-	ZNF865	ZNF865	TSS20655	chr19:56124958-56129907	-	-	0.0899567	0	0.180637	OK	0.0885586	0	0.178488	OK	0.126068	0.0228054	0.229331	OK	0.193994	0.0643198	0.323668	OK	0.037492	0	0.0936491	OK	0.135272	0.0294908
4610	chr8	135158493	135159492	+	0	NA	Intergenic	L2c|LINE|L2	260253	NR_125424	101927822	Hs.129114	NR_125424	ENSG00000253593	LOC101927822	-	uncharacterized LOC101927822	ncRNA	LOC101927822	-	-	LOC101927822	LOC101927822	TSS4864	chr8:134898738-134914650	-	-	0	0	0	OK	0	0	0	OK	0	0	0	OK	0	0	0	OK	0	0	0	OK	0	0
1998	chr15	63345233	63346232	+	0	NA	intron (NM_001018008, intron 1 of 7)	intron (NM_001018008, intron 1 of 7)	5096	NM_001018008	7168	Hs.133892	NM_000366	ENSG00000140416	TPM1	C15orf13|CMD1Y|CMH3|HEL-S-265|HTM-alpha|LVNC9|TMSA	tropomyosin 1 (alpha)	protein-coding
6774	chr8	97172281	97173926	+	0	NA	promoter-TSS (NM_001001557)	promoter-TSS (NM_001001557)	-83	NM_001001557	392255	Hs.492277	NM_001001557	ENSG00000156466	GDF6	BMP-13|BMP13|CDMP2|KFM|KFS|KFS1|KFSL|SGM1	growth differentiation factor 6	protein-coding	GDF6	-	-	GDF6	GDF6	TSS14925	chr8:97154557-97173020	-	-	4.59317	3.47278	5.71356	OK	4.17277	3.11578	5.22976	OK	2.1843	1.5343	2.8343	OK	2.88395	2.10421	3.6637	OK	1.60225	1.08897	2.11552	OK	1.59643	1.0824
6545	chr17	1996349	1997348	+	0	NA	intron (NM_017575, intron 13 of 18)	intron (NM_017575, intron 13 of 18)	-4793	NM_001282326	23293	Hs.448342	NM_017575	ENSG00000070366	SMG6	C17orf31|EST1A|SMG-6|hSMG5/7a	SMG6, nonsense mediated mRNA decay factor	protein-coding
5387	chr7	100183797	100184796	+	0	NA	promoter-TSS (NM_001289934)	promoter-TSS (NM_001289934)	340	NM_033506	26261	Hs.283764	NM_012172	ENSG00000106336	FBXO24	FBX24	F-box protein 24	protein-coding
2930	chr11	113488709	113489708	+	0	NA	Intergenic	Intergenic	87887	NR_110047	80975	Hs.46720	NM_030770	ENSG00000166682	TMPRSS5	SPINESIN	transmembrane protease, serine 5	protein-coding
6058	chr3	196233490	196234489	+	0	NA	3' UTR (NM_001077657, exon 3 of 3)	3' UTR (NM_001077657, exon 3 of 3)	-3350	NM_152617	165918	Hs.250648	NM_152617	ENSG00000163961	RNF168	hRNF168	ring finger protein 168	protein-coding	RNF168	-	-	RNF168	RNF168	TSS7187	chr3:196195656-196230639	-	-	11.3127	9.21809	13.4073	OK	7.71472	6.20206	9.22738	OK	12.3048	10.0371	14.5726	OK	9.78811	7.94102	11.6352	OK	10.9935	8.95314	13.0338	OK	7.9536	6.40645
1367	chr6	102415058	102416057	+	0	NA	intron (NM_001166247, intron 13 of 16)	intron (NM_001166247, intron 13 of 16)	568696	NM_021956	2898	Hs.98262	NM_021956	ENSG00000164418	GRIK2	EAA4|GLR6|GLUK6|GLUR6|GluK2|MRT6	glutamate ionotropic receptor kainate type subunit 2	protein-coding	GRIK2	-	-	GRIK2	GRIK2	TSS203	chr6:101846860-102517958	-	-	0.726195	0.471949	0.980441	OK	1.67166	1.21381	2.12952	OK	0.17812	0.0627176	0.293522	OK	1.13844	0.792082	1.4848	OK	4.58167	3.59309	5.57025	OK	8.43616	6.80189
6667	chr3	37217564	37218563	+	0	NA	promoter-TSS (NM_001134369)	promoter-TSS (NM_001134369)	-212	NM_001134369	9209	Hs.740522	NM_006309	ENSG00000093167	LRRFIP2	HUFI-2	LRR binding FLII interacting protein 2	protein-coding
6199	chr1	28832177	28833176	+	0	NA	intron (NR_030726, intron 1 of 12)	intron (NR_030726, intron 1 of 12)	221	NR_036473	8420	Hs.469723	NR_002909	ENSG00000242125	SNHG3	NCRNA00014|RNU17C|RNU17D|U17HG|U17HG-A|U17HG-AB	small nucleolar RNA host gene 3	ncRNA
3825	chr10	98130057	98131056	+	0	NA	intron (NM_012465, intron 19 of 20)	intron (NM_012465, intron 19 of 20)	-11434	NM_033207	93377	Hs.12449	NM_033207	ENSG00000197430	OPALIN	HTMP10|TMEM10|TMP10	oligodendrocytic myelin paranodal and inner loop protein	protein-coding	OPALIN	-	-	OPALIN	OPALIN	TSS26170,TSS7226	chr10:98102974-98119122	-	-	0	0	0	OK	0	0	0	OK	0	0	0	OK	0	0	0	OK	0	0	0	OK	0.00692521	0
5236	chr5	177631111	177632110	+	0	NA	5' UTR (NM_031266, exon 1 of 8)	5' UTR (NM_031266, exon 1 of 8)	102	NM_031266	3182	Hs.591731	NM_004499	ENSG00000197451	HNRNPAB	ABBP1|HNRPAB	heterogeneous nuclear ribonucleoprotein A/B	protein-coding
1070	chr6	85786350	85787349	+	0	NA	Intergenic	Intergenic	-312895	NM_001080508	9096	Hs.251830	NM_001080508	ENSG00000112837	TBX18	CAKUT2	T-box 18	protein-coding	TBX18	-	-	TBX18	TBX18	TSS13528	chr6:85442215-85473954	-	-	4.00226	3.15654	4.84797	OK	4.45477	3.51614	5.39341	OK	5.34699	4.24192	6.45206	OK	4.49755	3.55329	5.4418	OK	4.71914	3.74189	5.69638	OK	4.68139	3.71157
3117	chr8	132052023	132053022	+	0	NA	exon (NM_001115, exon 1 of 18)	exon (NM_001115, exon 1 of 18)	313	NM_001115	114	Hs.591859	NM_001115	ENSG00000155897	ADCY8	AC8|ADCY3|HBAC1	adenylate cyclase 8	protein-coding	ADCY8	-	-	ADCY8	ADCY8	TSS19979	chr8:131792546-132052835	-	-	0.00531903	0	0.0375017	OK	0.00520461	0	0.036935	OK	0	0	0	OK	0	0	0	OK	0	0	0	OK	0.00584418	0
3618	chr1	162673280	162674279	+	0	NA	intron (NM_006182, intron 2 of 17)	intron (NM_006182, intron 2 of 17)	71551	NM_001014796	4921	Hs.275757	NM_006182	ENSG00000162733	DDR2	MIG20a|NTRKR3|TKT|TYRO10	discoidin domain receptor tyrosine kinase 2	protein-coding
3275	chr7	131012147	131013146	+	0	NA	promoter-TSS (NM_013255)	promoter-TSS (NM_013255)	51	NM_013255	4289	Hs.44693	NM_013255	ENSG00000128585	MKLN1	TWA2	muskelin 1	protein-coding	MKLN1	-	-	MKLN1	MKLN1	TSS1161,TSS24533	chr7:130794854-131181398	-	-	7.8331	6.44446	9.22174	OK	8.15456	6.69985	9.60927	OK	8.73351	7.19411	10.2729	OK	7.22393	5.91147	8.53638	OK	7.40951	6.09471	8.72431	OK	6.60419	5.39516
2463	chr10	29782558	29783557	+	0	NA	intron (NM_003174, intron 18 of 35)	AluJo|SINE|Alu	50969	NR_030335	693189		NR_030335	ENSG00000207612	MIR604	MIRN604|hsa-mir-604	microRNA 604	ncRNA	MIR604	-	-	MIR604	MIR604	TSS867	chr10:29698462-30024730	-	-	0	0	0	OK	0	0	0	OK	0	0	0	OK	0	0	0	OK	0	0	0	OK	0	0
4332	chr16	90101561	90102560	+	0	NA	exon (NM_001286209, exon 5 of 11)	exon (NM_001286209, exon 5 of 11)	-5751	NR_122031	750	Hs.633032	NM_001214		GAS8-AS1	C16orf3	GAS8 antisense RNA 1	ncRNA
2493	chr11	67071008	67072007	+	0	NA	intron (NM_017857, intron 1 of 13)	CpG	588	NM_017857	54961	Hs.29173	NM_017857	ENSG00000172830	SSH3	SSH3L	slingshot protein phosphatase 3	protein-coding	SSH3	-	-	SSH3	SSH3	TSS24689	chr11:67070918-67080078	-	-	4.78386	3.57303	5.99469	OK	6.53962	5.03925	8.03998	OK	7.66545	5.99274	9.33817	OK	7.52398	5.84585	9.20211	OK	6.64733	5.11442	8.18024	OK	9.20931	7.22869
105	chr17	14641333	14642332	+	0	NA	Intergenic	Intergenic	-276290	NR_135638	101928475	Hs.638944	NR_135638	ENSG00000232058	LOC101928475	-	uncharacterized LOC101928475	ncRNA
5976	chr3	111681099	111682098	+	0	NA	intron (NM_001134438, intron 13 of 17)	AluSq2|SINE|Alu	-16125	NM_018394	55347	Hs.477115	NM_018394	ENSG00000144827	ABHD10	-	abhydrolase domain containing 10	protein-coding	ABHD10	-	-	ABHD10	ABHD10	TSS22769	chr3:111697722-111712215	-	-	25.7703	21.0543	30.4864	OK	23.6878	19.2483	28.1272	OK	27.4987	22.409	32.5884	OK	25.5892	20.8823	30.296	OK	20.6588	16.7659	24.5517	OK	16.5941	13.3446
6532	chr16	86530527	86531526	+	0	NA	intron (NR_036444, intron 1 of 3)	CpG	11440	NR_036444	400550	Hs.448825	NR_033925	ENSG00000268388	FENDRR	FOXF1-AS1|TCONS_00024240|lincFOXF1|onco-lncRNA-21	FOXF1 adjacent non-coding developmental regulatory RNA	ncRNA
4500	chr10	70141594	70142593	+	0	NA	intron (NM_001042417, intron 9 of 11)	AluY|SINE|Alu	24853	NR_103475	55680	Hs.653144	NM_017987	ENSG00000204130	RUFY2	RABIP4R|ZFYVE13	RUN and FYVE domain containing 2	protein-coding
2380	chr1	161124105	161125104	+	0	NA	intron (NM_016406, intron 1 of 5)	intron (NM_016406, intron 1 of 5)	1070	NM_016406	51506	Hs.301412	NM_016406	ENSG00000143222	UFC1	HSPC155	ubiquitin-fold modifier conjugating enzyme 1	protein-coding	UFC1	-	-	UFC1	UFC1	TSS22294	chr1:161123533-161128646	-	-	41.0603	32.8925	49.2281	OK	41.0179	32.8158	49.2199	OK	49.7487	40.1674	59.33	OK	49.1366	39.665	58.6083	OK	48.9414	39.4928	58.3901	OK	92.5518	76.0665
111	chr17	73996394	73997393	+	0	NA	promoter-TSS (NM_001258)	promoter-TSS (NM_001258)	-94	NM_001258	1018	Hs.706766	NM_001258	ENSG00000250506	CDK3	-	cyclin dependent kinase 3	protein-coding	CDK3	-	-	CDK3	CDK3	TSS27280	chr17:73937588-74002080	-	-	1.48902	0	2.99157	OK	2.30231	0.180948	4.42368	OK	1.21336	0	2.61278	OK	2.43172	0.444311	4.41913	OK	1.52114	0	3.1192	OK	2.74916	0.471838
3549	chr5	9892451	9893450	+	0	NA	intron (NR_027112, intron 2 of 12)	intron (NR_027112, intron 2 of 12)	10986	NR_027112	285692	Hs.651487	NR_027112	ENSG00000249781	LINC02112	-	long intergenic non-protein coding RNA 2112	ncRNA
408	chr11	6163359	6164358	+	0	NA	Intergenic	Intergenic	27698	NM_001004052	255725	Hs.690457	NM_001004052	ENSG00000255307	OR52B2	OR11-70	olfactory receptor family 52 subfamily B member 2	protein-coding	OR52B2	-	-	OR52B2	OR52B2	TSS17248	chr11:6190584-6191556	-	-	0	0	0	OK	0	0	0	OK	0	0	0	OK	0	0	0	OK	0	0	0	OK	0	0
6206	chr3	197305559	197306558	+	0	NA	Intergenic	AluSp|SINE|Alu	-5864	NM_203315	622	Hs.274539	NM_004051	ENSG00000161267	BDH1	BDH|SDR9C1	3-hydroxybutyrate dehydrogenase 1	protein-coding
5410	chr1	10005490	10006489	+	0	NA	intron (NM_022787, intron 1 of 4)	AluJb|SINE|Alu	2503	NM_022787	64802	Hs.633762	NM_022787	ENSG00000173614	NMNAT1	LCA9|NMNAT|PNAT1	nicotinamide nucleotide adenylyltransferase 1	protein-coding	NMNAT1	-	-	NMNAT1	NMNAT1	TSS17188,TSS26873	chr1:10002980-10045556	-	-	4.04585	2.40617	5.68552	OK	4.20416	2.68989	5.71843	OK	4.54062	3.14575	5.9355	OK	5.52802	3.81743	7.23862	OK	4.24851	2.90355	5.59346	OK	7.92015	5.47249
5038	chr5	130474856	130475855	+	0	NA	Intergenic	MER65A|LTR|ERV1	25686	NR_073488	3094	Hs.483305	NM_005340	ENSG00000169567	HINT1	HINT|NMAN|PKCI-1|PRKCNH1	histidine triad nucleotide binding protein 1	protein-coding
4776	chr17	12839702	12840701	+	0	NA	intron (NM_001321166, intron 7 of 19)	L1MC1|LINE|L1	-19542	NR_039747	100616494		NR_039747	ENSG00000265503	MIR1269B	-	microRNA 1269b	ncRNA	MIR1269B	-	-	MIR1269B	MIR1269B	TSS29511	chr17:12569206-12921381	-	-	0	0	0	OK	0	0	0	OK	0	0	0	OK	0	0	0	OK	0	0	0	OK	0	0
5517	chr8	25998593	25999592	+	0	NA	Intergenic	Intergenic	-96452	NM_022659	64641	Hs.491292	NM_022659	ENSG00000221818	EBF2	COE2|EBF-2|O/E-3|OE-3	early B-cell factor 2	protein-coding	EBF2	-	-	EBF2	EBF2	TSS18274	chr8:25699245-25902640	-	-	3.06453	2.3396	3.78945	OK	1.52714	1.09722	1.95706	OK	5.61854	4.43363	6.80345	OK	1.34774	0.95363	1.74185	OK	0.460883	0.270927	0.650839	OK	0.195906	0.0813284
3577	chr22	42342071	42343070	+	0	NA	5' UTR (NM_001304370, exon 1 of 5)	5' UTR (NM_001304370, exon 1 of 5)	188	NM_001304373	79019	Hs.208912	NM_024053	ENSG00000100162	CENPM	C22orf18|CENP-M|PANE1	centromere protein M	protein-coding
2777	chr7	130571640	130572639	+	0	NA	intron (NR_110472, intron 2 of 3)	intron (NR_110472, intron 2 of 3)	-9841	NR_029517	407024		NR_029517	ENSG00000226380	MIR29B1	MIRN29B1|miR-29b|miRNA29B1|mir-29b-1	microRNA 29b-1	ncRNA	MIR29B1	-	-	MIR29B1	MIR29B1	TSS32282	chr7:130562217-130562298	-	-	0	0	0	OK	0	0	0	OK	0	0	0	OK	0	0	0	OK	0	0	0	OK	0	0
5679	chr16	1469562	1470561	+	0	NA	3' UTR (NM_001272051, exon 2 of 2)	3' UTR (NM_001272051, exon 2 of 2)	740	NM_001272051	283951	Hs.58373	NM_001010878	ENSG00000174109	C16orf91	CCSMST1|URLC5|gs103	chromosome 16 open reading frame 91	protein-coding
559	chr16	16113009	16114008	+	0	NA	intron (NM_004996, intron 5 of 30)	intron (NM_004996, intron 5 of 30)	70074	NM_004996	4363	Hs.391464	NM_004996	ENSG00000103222	ABCC1	ABC29|ABCC|GS-X|MRP|MRP1	ATP binding cassette subfamily C member 1	protein-coding	ABCC1	-	-	ABCC1	ABCC1	TSS26086	chr16:16043433-16236930	-	-	5.38818	4.29178	6.48459	OK	3.42435	2.6756	4.17309	OK	3.29427	2.57262	4.01592	OK	2.07266	1.56717	2.57815	OK	3.52808	2.75806	4.2981	OK	5.47889	4.37842
6579	chr17	80186332	80187331	+	0	NA	promoter-TSS (NM_004207)	promoter-TSS (NM_004207)	-56	NM_004207	9123	Hs.500761	NM_004207	ENSG00000141526	SLC16A3	MCT 3|MCT 4|MCT-3|MCT-4|MCT3|MCT4	solute carrier family 16 member 3	protein-coding	SLC16A3	-	-	SLC16A3	SLC16A3	TSS11411,TSS17474,TSS19062,TSS33614,TSS4341	chr17:80186281-80197375	-	-	44.9107	36.4488	53.3727	OK	64.5948	53.145	76.0445	OK	66.5646	54.877	78.2522	OK	81.9753	67.814	96.1365	OK	70.3144	58.0209	82.608	OK	105.223	87.3435
5655	chr7	17279219	17280218	+	0	NA	Intergenic	Intergenic	-58558	NM_001621	196	Hs.171189	NM_001621	ENSG00000106546	AHR	bHLHe76	aryl hydrocarbon receptor	protein-coding	AHR	-	-	AHR	AHR	TSS31097	chr7:17338275-17385775	-	-	36.2043	30.2432	42.1655	OK	47.1546	39.4285	54.8807	OK	31.7074	26.3797	37.035	OK	25.2904	21.0145	29.5663	OK	35.7621	29.8511	41.6732	OK	28.0566	23.3618
3601	chr20	12776181	12777180	+	0	NA	Intergenic	Intergenic	140931	NR_109872	102606466	Hs.602196	NR_109872		LOC102606466	-	uncharacterized LOC102606466	ncRNA	LOC102606466	-	-	LOC102606466	LOC102606466	TSS24960	chr20:12845851-12933167	-	-	0	0	0	OK	0	0	0	OK	0	0	0	OK	0	0	0	OK	0	0	0	OK	0	0
5301	chr12	49450336	49451335	+	0	NA	Intergenic	Intergenic	-1728	NM_003482	8085	Hs.731384	NM_003482	ENSG00000167548	KMT2D	AAD10|ALR|CAGL114|KABUK1|KMS|MLL2|MLL4|TNRC21	lysine methyltransferase 2D	protein-coding	KMT2D	-	-	KMT2D	KMT2D	TSS25646	chr12:49412757-49449107	-	-	0.215316	0.140982	0.28965	OK	0.185859	0.120281	0.251438	OK	0.191758	0.126808	0.256708	OK	0.174802	0.112327	0.237277	OK	0.183594	0.118725	0.248464	OK	0.293239	0.203053
6777	chr8	104512883	104513882	+	0	NA	intron (NM_001100117, intron 1 of 23)	CpG-25931	406	NM_001100117	9699	Hs.655271	NM_014677	ENSG00000176406	RIMS2	OBOE|RAB3IP3|RIM2	regulating synaptic membrane exocytosis 2	protein-coding
6236	chr11	114113197	114114196	+	0	NA	intron (NM_001018011, intron 5 of 6)	intron (NM_001018011, intron 5 of 6)	-52839	NM_006169	4837	Hs.503911	NM_006169	ENSG00000166741	NNMT	-	nicotinamide N-methyltransferase	protein-coding	NNMT	-	-	NNMT	NNMT	TSS15815	chr11:114166534-114183238	-	-	69.7505	57.468	82.033	OK	240.086	201.144	279.029	OK	128.175	106.724	149.626	OK	421.395	354.187	488.603	OK	107.809	89.5562	126.063	OK	246.1	206.24
580	chr19	36000918	36001917	+	0	NA	promoter-TSS (NR_033746)	promoter-TSS (NR_033746)	-5	NR_033746	93099	Hs.417795	NM_033317	ENSG00000161249	DMKN	UNQ729|ZD52F10	dermokine	protein-coding
4956	chr7	146899986	146900985	+	0	NA	intron (NM_014141, intron 8 of 23)	AluSx1|SINE|Alu	-105784	NR_110829	101928700	Hs.571218	NR_110829	ENSG00000236795	LOC101928700	-	uncharacterized LOC101928700	ncRNA	LOC101928700	-	-	LOC101928700	LOC101928700	TSS8587	chr7:145813452-148118088	-	-	0	0	0	OK	0	0	0	OK	0	0	0	OK	0	0	0	OK	0	0	0	OK	0	0
2800	chr19	28959680	28960679	+	0	NA	intron (NR_110759, intron 5 of 9)	intron (NR_110759, intron 5 of 9)	-137416	NR_135636	102724908		NR_135636	ENSG00000266976	LOC102724908	-	uncharacterized LOC102724908	ncRNA
6632	chr20	56283790	56284789	+	0	NA	promoter-TSS (NR_131157)	promoter-TSS (NR_131157)	742	NM_020182	56937	Hs.517155	NM_020182	ENSG00000124225	PMEPA1	STAG1|TMEPAI	prostate transmembrane protein, androgen induced 1	protein-coding	PMEPA1	-	-	PMEPA1	PMEPA1	TSS26853,TSS30984,TSS6054,TSS8784	chr20:56223447-56287836	-	-	0.105539	0	0.243238	OK	0.362368	0.158903	0.565834	OK	0.204624	0.0521305	0.357117	OK	0.787535	0.466808	1.10826	OK	0.742142	0.449863	1.03442	OK	3.80384	2.8733
5818	chr2	73144532	73145531	+	0	NA	exon (NM_004097, exon 1 of 3)	exon (NM_004097, exon 1 of 3)	427	NM_004097	2016	Hs.516090	NM_004097	ENSG00000135638	EMX1	-	empty spiracles homeobox 1	protein-coding	EMX1	-	-	EMX1	EMX1	TSS680	chr2:73144603-73162020	-	-	0	0	0	OK	0	0	0	OK	0	0	0	OK	0	0	0	OK	0	0	0	OK	0	0
2523	chr3	129324980	129325979	+	0	NA	exon (NM_015103, exon 1 of 36)	exon (NM_015103, exon 1 of 36)	103	NM_015103	23129	Hs.301685	NM_015103	ENSG00000004399	PLXND1	PLEXD1	plexin D1	protein-coding	PLXND1	-	-	PLXND1	PLXND1	TSS6985	chr3:129274055-129325582	-	-	2.85861	2.18923	3.52798	OK	4.34518	3.43542	5.25495	OK	2.06002	1.56517	2.55487	OK	3.01254	2.33647	3.68862	OK	3.90466	3.06497	4.74434	OK	6.24637	5.01426
5103	chr5	172742220	172743219	+	0	NA	3' UTR (NM_003714, exon 4 of 4)	3' UTR (NM_003714, exon 4 of 4)	13787	NM_003714	8614	Hs.233160	NM_003714	ENSG00000113739	STC2	STC-2|STCRP	stanniocalcin 2	protein-coding	STC2	-	-	STC2	STC2	TSS33930	chr5:172741725-172756506	-	-	135.876	114.119	157.633	OK	165.669	139.349	191.989	OK	64.8948	54.3128	75.4767	OK	61.2067	51.2317	71.1817	OK	242.665	204.258	281.073	OK	250.922	211.228
4618	chr5	81044765	81045764	+	0	NA	intron (NM_012446, intron 1 of 16)	intron (NM_012446, intron 1 of 16)	1808	NM_001256732	23635	Hs.102735	NM_012446	ENSG00000145687	SSBP2	HSPC116|SOSS-B2	single stranded DNA binding protein 2	protein-coding
6458	chr12	521062	522061	+	0	NA	intron (NM_032358, intron 4 of 12)	intron (NM_032358, intron 4 of 12)	10820	NM_001130146	84318	Hs.631656	NM_032358	ENSG00000120647	CCDC77	-	coiled-coil domain containing 77	protein-coding
3808	chr2	162761456	162762455	+	0	NA	intron (NM_022058, intron 13 of 25)	MER1B|DNA|hAT-Charlie	169097	NM_001935	1803	Hs.368912	NM_001935	ENSG00000197635	DPP4	ADABP|ADCP2|CD26|DPPIV|TP103	dipeptidyl peptidase 4	protein-coding	DPP4	-	-	DPP4	DPP4	TSS10557	chr2:162848754-162931052	-	-	11.7854	9.54597	14.0249	OK	6.39038	5.04064	7.74011	OK	10.3201	8.29904	12.3411	OK	2.07683	1.51068	2.64298	OK	0.789861	0.501968	1.07775	OK	0.86779	0.563323
1257	chr6	30688745	30689744	+	0	NA	promoter-TSS (NM_001293212).7	promoter-TSS (NM_001293212).7	-82	NM_001293212	203068	Hs.636480	NM_178014	ENSG00000196230	TUBB	CDCBM6|CSCSC1|M40|OK/SW-cl.56|TUBB1|TUBB5	tubulin beta class I	protein-coding
31	chr5	73338440	73339439	+	0	NA	Intergenic	Intergenic	229596	NM_001244364	64283	Hs.482521	NM_001080479	ENSG00000214944	ARHGEF28	RGNEF|RIP2|p190RHOGEF	Rho guanine nucleotide exchange factor 28	protein-coding
4717	chr10	88134646	88135645	+	0	NA	Intergenic	Intergenic	-8895	NM_017551	2894	Hs.530653	NM_017551	ENSG00000182771	GRID1	GluD1	glutamate ionotropic receptor delta type subunit 1	protein-coding	GRID1	-	-	GRID1	GRID1	TSS24669	chr10:87337487-88126250	-	-	0.0105987	0	0.0327646	OK	0.00343163	0	0.0252192	OK	0	0	0	OK	0.00340229	0	0.0252538	OK	0.00718894	0	0.029015	OK	0.028682	0
4093	chr20	43934444	43935443	+	0	NA	promoter-TSS (NM_001281449)	promoter-TSS (NM_001281449)	-540	NM_001281448	11317	Hs.248217	NM_014276	ENSG00000124232	RBPJL	RBPL|RBPSUHL|SUHL	recombination signal binding protein for immunoglobulin kappa J region like	protein-coding
2307	chr2	223572328	223573327	+	0	NA	intron (NM_058165, intron 5 of 5)	AluSx1|SINE|Alu	36370	NM_058165	116255	Hs.344090	NM_058165	ENSG00000124003	MOGAT1	DGAT2L|DGAT2L1|MGAT1	monoacylglycerol O-acyltransferase 1	protein-coding	MOGAT1	-	-	MOGAT1	MOGAT1	TSS23035	chr2:223536456-223574649	-	-	0	0	0	OK	0	0	0	OK	0	0	0	OK	0	0	0	OK	0	0	0	OK	0	0
2706	chr2	47426019	47427018	+	0	NA	intron (NR_110208, intron 4 of 4)	intron (NR_110208, intron 4 of 4)	-22443	NM_001305625	805	Hs.468442	NM_001743	ENSG00000143933	CALM2	CAMII|LQT15|PHKD|PHKD2|caM	calmodulin 2	protein-coding
6609	chr2	175869216	175870215	+	0	NA	5' UTR (NM_001025201, exon 2 of 13)	5' UTR (NM_001025201, exon 2 of 13)	266	NM_001822	1123	Hs.380138	NM_001822	ENSG00000128656	CHN1	ARHGAP2|CHN|DURS2|NC|RHOGAP2	chimerin 1	protein-coding	CHN1	-	-	CHN1	CHN1	TSS15472,TSS30141,TSS32953	chr2:175664041-175870107	-	-	1.64657	1.08465	2.20849	OK	1.85618	1.24072	2.47163	OK	0.397698	0.117596	0.6778	OK	0.825153	0.449675	1.20063	OK	1.14819	0.693852	1.60253	OK	1.11801	0.664038
5973	chr4	113250473	113251472	+	0	NA	intron (NM_001253884, intron 2 of 14)	intron (NM_001253884, intron 2 of 14)	32473	NM_001102406	80216	Hs.652825	NM_025144	ENSG00000073331	ALPK1	8430410J10Rik|LAK	alpha kinase 1	protein-coding
4439	chr2	28915181	28916180	+	0	NA	Intergenic	Intergenic	-58934	NM_206876	5500	Hs.702907	NM_002709	ENSG00000213639	PPP1CB	HEL-S-80p|PP-1B|PP1B|PP1beta|PPP1CD	protein phosphatase 1 catalytic subunit beta	protein-coding
4160	chr11	47290474	47291473	+	0	NA	promoter-TSS (NM_130472)	promoter-TSS (NM_130472)	46	NM_130470	8567	Hs.82548	NM_003682	ENSG00000110514	MADD	DENN|IG20|RAB3GEP	MAP kinase activating death domain	protein-coding
5444	chr1	21563998	21564997	+	0	NA	intron (NM_001113349, intron 10 of 17)	intron (NM_001113349, intron 10 of 17)	41686	NM_001113347	1889	Hs.195080	NM_001397	ENSG00000117298	ECE1	ECE	endothelin converting enzyme 1	protein-coding
3336	chr19	41769817	41770816	+	0	NA	promoter-TSS (NM_001321208)	promoter-TSS (NM_001321208)	52	NM_001321208	11100	Hs.155218	NM_007040	ENSG00000105323	HNRNPUL1	E1B-AP5|E1BAP5|HNRPUL1	heterogeneous nuclear ribonucleoprotein U like 1	protein-coding
5502	chr12	51630564	51631563	+	0	NA	Intergenic	AluSx|SINE|Alu	-1445	NM_014764	9802	Hs.369761	NM_014764	ENSG00000183283	DAZAP2	PRTB	DAZ associated protein 2	protein-coding	DAZAP2	-	-	DAZAP2	DAZAP2	TSS6725	chr12:51632507-51664202	-	-	110.446	91.2524	129.641	OK	140.683	116.955	164.411	OK	87.9487	71.9471	103.95	OK	103.3	85.4835	121.117	OK	150.983	126	175.967	OK	171.015	142.791
4629	chr7	107524959	107525958	+	0	NA	Intergenic	MER9a2|LTR|ERVK	-6094	NM_001289750	1738	Hs.131711	NM_000108	ENSG00000091140	DLD	DLDD|DLDH|E3|GCSL|LAD|PHE3	dihydrolipoamide dehydrogenase	protein-coding
2133	chr8	72755865	72756864	+	0	NA	promoter-TSS (NR_033651)	promoter-TSS (NR_033651)	13	NR_033651	100132891	Hs.137674	NR_033651	ENSG00000235531	MSC-AS1	-	MSC antisense RNA 1	ncRNA	MSC-AS1	-	-	MSC-AS1	MSC-AS1	TSS13033,TSS1471	chr8:72753776-72987819	-	-	5.76857	4.00573	7.53142	OK	12.7615	9.43053	16.0924	OK	6.47598	4.85443	8.09754	OK	9.45378	7.02111	11.8864	OK	6.04594	4.27876	7.81313	OK	13.9618	10.0998
5104	chr12	11079541	11080540	+	0	NA	intron (NM_001291314, intron 3 of 6)	intron (NM_001291314, intron 3 of 6)	-1795	NM_001110213	5555	Hs.408153	NM_005042	ENSG00000134551	PRH2	PRP-1/PRP-2|Pr|pr1/Pr2	proline rich protein HaeIII subfamily 2	protein-coding
968	chr10	80911203	80912202	+	0	NA	intron (NM_020338, intron 3 of 24)	intron (NM_020338, intron 3 of 24)	82910	NM_020338	57178	Hs.193118	NM_020338	ENSG00000108175	ZMIZ1	MIZ|RAI17|TRAFIP10|ZIMP10|hZIMP10	zinc finger MIZ-type containing 1	protein-coding	ZMIZ1	-	-	ZMIZ1	ZMIZ1	TSS30612	chr10:80828791-81076285	-	-	3.73233	2.92918	4.53549	OK	6.482	5.23134	7.73266	OK	4.05664	3.22609	4.88719	OK	7.15914	5.80593	8.51234	OK	3.29553	2.58526	4.0058	OK	5.62958	4.52499
675	chr20	39706712	39707711	+	0	NA	intron (NM_003286, intron 5 of 20)	intron (NM_003286, intron 5 of 20)	49753	NM_003286	7150	Hs.472737	NM_003286	ENSG00000198900	TOP1	TOPI	topoisomerase (DNA) I	protein-coding	TOP1	-	-	TOP1	TOP1	TSS33886	chr20:39657461-39804357	-	-	13.3734	8.46532	18.2815	OK	10.2875	5.94555	14.6294	OK	15.6951	11.6504	19.7397	OK	15.2806	10.5468	20.0143	OK	10.8183	6.53411	15.1025	OK	8.72892	5.34484
4969	chr2	172426783	172427782	+	0	NA	Intergenic	AluJr|SINE|Alu	48416	NM_001127383	79901	Hs.221941	NM_024843	ENSG00000071967	CYBRD1	CYB561A2|DCYTB|FRRS3	cytochrome b reductase 1	protein-coding
6529	chr16	75528807	75529806	+	0	NA	promoter-TSS (NM_021615)	promoter-TSS (NM_021615)	-380	NM_021615	4166	Hs.655622	NM_021615	ENSG00000183196	CHST6	MCDC1	carbohydrate sulfotransferase 6	protein-coding	CHST6	-	-	CHST6	CHST6	TSS25095	chr16:75507021-75528926	-	-	0	0	0	OK	0.00859643	0	0.0272867	OK	0	0	0	OK	0.00293184	0	0.0215864	OK	0	0	0	OK	0	0
4722	chr1	33500531	33501530	+	0	NA	intron (NM_001319140, intron 1 of 6)	L2c|LINE|L2	1482	NM_001319139	204	Hs.470907	NM_001625	ENSG00000004455	AK2	ADK2	adenylate kinase 2	protein-coding
431	chr16	84652116	84653115	+	0	NA	promoter-TSS (NM_021149)	promoter-TSS (NM_021149)	-913	NM_021149	23406	Hs.289092	NM_021149	ENSG00000103187	COTL1	CLP	coactosin like F-actin binding protein 1	protein-coding	COTL1	-	-	COTL1	COTL1	TSS26844	chr16:84599203-84651702	-	-	284.261	238.108	330.414	OK	217.458	181.952	252.964	OK	155.007	129.207	180.807	OK	85.6564	70.6408	100.672	OK	139.5	115.767	163.234	OK	84.4812	69.8033
3541	chr9	15304729	15305728	+	0	NA	intron (NM_152574, intron 1 of 19)	intron (NM_152574, intron 1 of 19)	2130	NM_001168341	158219	Hs.563630	NM_152574	ENSG00000155158	TTC39B	C9orf52	tetratricopeptide repeat domain 39B	protein-coding
382	chr1	205267291	205268290	+	0	NA	Intergenic	Intergenic	23129	NM_030952	81788	Hs.497512	NM_030952	ENSG00000163545	NUAK2	SNARK	NUAK family kinase 2	protein-coding	NUAK2	-	-	NUAK2	NUAK2	TSS1704	chr1:205271190-205290919	-	-	14.4684	11.6501	17.2868	OK	6.79672	5.30084	8.29259	OK	10.8458	8.67394	13.0176	OK	4.30255	3.26067	5.34442	OK	12.4999	10.0295	14.9703	OK	3.69528	2.76234
3487	chr6	161548626	161549625	+	0	NA	Intergenic	MER58A|DNA|hAT-Charlie	33889	NR_024277	79992	Hs.664873	NM_024929	ENSG00000279355	AGPAT4-IT1	C6orf59|NCRNA00241	AGPAT4 intronic transcript 1	ncRNA
2846	chr11	122526436	122527435	+	0	NA	intron (NM_032873, intron 1 of 13)	CpG	537	NM_032873	84959	Hs.444075	NM_032873	ENSG00000154127	UBASH3B	STS-1|STS1|TULA-2|TULA2|p70	ubiquitin associated and SH3 domain containing B	protein-coding	UBASH3B	-	-	UBASH3B	UBASH3B	TSS33226	chr11:122526397-122685187	-	-	28.8758	24.0867	33.6649	OK	14.3178	11.8177	16.818	OK	20.6455	17.132	24.1591	OK	12.775	10.5175	15.0324	OK	28.2881	23.591	32.9851	OK	11.1039	9.11833
4208	chr10	123906091	123907090	+	0	NA	intron (NM_206862, intron 7 of 22)	L1MC3|LINE|L1	-16351	NM_206860	10579	Hs.501252	NM_006997	ENSG00000138162	TACC2	AZU-1|ECTACC	transforming acidic coiled-coil containing protein 2	protein-coding
4729	chr11	65189317	65190924	+	0	NA	promoter-TSS (NR_028272)	promoter-TSS (NR_028272)	-149	NR_131012	283131	Hs.523789	NR_002802	ENSG00000245532	NEAT1	LINC00084|NCRNA00084|TncRNA|VINC	nuclear paraspeckle assembly transcript 1 (non-protein coding)	ncRNA
4329	chr14	59053579	59054578	+	0	NA	Intergenic	MLT1N2|LTR|ERVL-MaLR	-46708	NR_046093	51339	Hs.48950	NM_016651	ENSG00000165617	DACT1	DAPPER|DAPPER1|DPR1|FRODO|HDPR1|THYEX3	dishevelled binding antagonist of beta catenin 1	protein-coding
3863	chr5	1798779	1799778	+	0	NA	intron (NM_032479, intron 1 of 1)	intron (NM_032479, intron 1 of 1)	678	NM_032479	64979	Hs.719465	NM_032479	ENSG00000171421	MRPL36	BRIP1|L36mt|MRP-L36|PRPL36|RPMJ	mitochondrial ribosomal protein L36	protein-coding	MRPL36	-	-	MRPL36	MRPL36	TSS16129	chr5:1798498-1799956	-	-	91.9743	72.8706	111.078	OK	86.7529	68.6341	104.872	OK	81.7392	64.8377	98.6407	OK	106.01	85.0038	127.016	OK	98.1176	78.4347	117.8	OK	108.105	86.5169
139	chr3	187871057	187872056	+	0	NA	promoter-TSS (NM_001167672)	promoter-TSS (NM_001167672)	-105	NM_001167672	4026	Hs.720220	NM_005578	ENSG00000145012	LPP	-	LIM domain containing preferred translocation partner in lipoma	protein-coding
129	chr17	7341125	7342124	+	0	NA	promoter-TSS (NR_130156)	promoter-TSS (NR_130156)	32	NR_130156	2256	Hs.655193	NM_004112	ENSG00000161958	FGF11	FGF-11|FHF-3|FHF3	fibroblast growth factor 11	protein-coding
6077	chr1	151253977	151254976	+	0	NA	promoter-TSS (NR_135595)	promoter-TSS (NR_135595)	-71	NR_135595	100507670	Hs.225083	NR_135595	ENSG00000232671	LOC100507670	-	uncharacterized LOC100507670	ncRNA
4662	chr7	33944082	33945081	+	0	NA	promoter-TSS (NM_133468)	promoter-TSS (NM_133468)	58	NM_133468	168667	Hs.660998	NM_133468	ENSG00000164619	BMPER	CRIM3|CV-2|CV2	BMP binding endothelial regulator	protein-coding	BMPER	-	-	BMPER	BMPER	TSS22189	chr7:33944522-34195484	-	-	6.32419	5.04688	7.60149	OK	1.43761	1.03163	1.84359	OK	4.0862	3.18086	4.99154	OK	0.76155	0.496757	1.02634	OK	7.78125	6.25686	9.30565	OK	1.82837	1.34606
6033	chr16	70176887	70177886	+	0	NA	intron (NM_001322119, intron 11 of 16)	intron (NM_001322119, intron 11 of 16)	29857	NM_017990	55066	Hs.744043	NM_017990	ENSG00000090857	PDPR	PDP3	pyruvate dehydrogenase phosphatase regulatory subunit	protein-coding	PDPR	-	-	PDPR	PDPR	TSS20766	chr16:70147528-70207351	-	-	3.97026	3.16359	4.77693	OK	4.33597	3.46723	5.20471	OK	2.67691	2.09488	3.25895	OK	3.3358	2.6386	4.03301	OK	4.40591	3.52686	5.28495	OK	5.11795	4.12159
3008	chr6	89977299	89978298	+	0	NA	exon (NM_002043, exon 5 of 9)	exon (NM_002043, exon 5 of 9)	-36791	NM_001267582	2569	Hs.99927	NM_002042	ENSG00000146276	GABRR1	-	gamma-aminobutyric acid type A receptor rho1 subunit	protein-coding
926	chr13	43727456	43728455	+	0	NA	intron (NR_047013, intron 1 of 2)	intron (NR_047013, intron 1 of 2)	40654	NR_047013	100874159	Hs.633241	NR_047013		LINC00400	-	long intergenic non-protein coding RNA 400	ncRNA	LINC00400	-	-	LINC00400	LINC00400	TSS17380	chr13:43687300-43733602	-	-	0	0	0	OK	0	0	0	OK	0	0	0	OK	0	0	0	OK	0	0	0	OK	0	0
4377	chr21	44968462	44969461	+	0	NA	intron (NM_007031, intron 8 of 8)	AluSx|SINE|Alu	60909	NR_106718	102464825		NR_106718	ENSG00000278433	MIR6070	hsa-mir-6070	microRNA 6070	ncRNA	MIR6070	-	-	MIR6070	MIR6070	TSS12401	chr21:44949071-45079374	-	-	0	0	0	OK	0	0	0	OK	0	0	0	OK	0	0	0	OK	0	0	0	OK	0	0
1246	chr3	16770041	16771040	+	0	NA	Intergenic	MER20|DNA|hAT-Charlie	-123534	NM_001351	1618	Hs.131179	NM_001351	ENSG00000092345	DAZL	DAZH|DAZL1|DAZLA|SPGYLA	deleted in azoospermia like	protein-coding	DAZL	-	-	DAZL	DAZL	TSS17462,TSS23754	chr3:16628300-16647006	-	-	0.0122712	0	0.0694659	OK	0	0	0	OK	0.0236274	0	0.0857892	OK	0	0	0	OK	0	0	0	OK	0	0
1083	chr7	73022427	73023426	+	0	NA	intron (NM_032951, intron 2 of 16)	AluSc|SINE|Alu	15944	NM_032953	51085	Hs.647055	NM_032951	ENSG00000009950	MLXIPL	CHREBP|MIO|MLX|MONDOB|WBSCR14|WS-bHLH|bHLHd14	MLX interacting protein like	protein-coding
4000	chr8	96522801	96523800	+	0	NA	intron (NR_038207, intron 2 of 2)	intron (NR_038207, intron 2 of 2)	-241838	NM_177965	157657	Hs.548157	NM_177965	ENSG00000156172	C8orf37	BBS21|CORD16|RP64|smalltalk	chromosome 8 open reading frame 37	protein-coding	C8orf37	-	-	C8orf37	C8orf37	TSS21489	chr8:96257140-96822371	-	-	1.22484	0.818995	1.63069	OK	1.59158	1.10004	2.08312	OK	2.11796	1.50029	2.73562	OK	1.91635	1.35311	2.4796	OK	1.09655	0.719854	1.47325	OK	1.83099	1.28875
1293	chr21	46749635	46750634	+	0	NA	Intergenic	Intergenic	11771	NR_103811	388830	Hs.592162	NR_103811	ENSG00000237664	LINC00316	C21orf111|NCRNA00316|PRED59	long intergenic non-protein coding RNA 316	ncRNA	LINC00316	-	-	LINC00316	LINC00316	TSS21282	chr21:46758504-46761905	-	-	0	0	0	OK	0	0	0	OK	0	0	0	OK	0	0	0	OK	0	0	0	OK	0	0
6137	chr7	144741030	144742029	+	0	NA	Intergenic	Intergenic	-208383	NM_001042482	27010	Hs.660232	NM_022445	ENSG00000196511	TPK1	HTPK1|PP20|THMD5	thiamin pyrophosphokinase 1	protein-coding
3024	chr20	47083533	47084532	+	0	NA	Intergenic	Intergenic	95378	NR_026958	284749	Hs.299080	NR_026958	ENSG00000235621	LINC00494	-	long intergenic non-protein coding RNA 494	ncRNA	LINC00494	-	-	LINC00494	LINC00494	TSS5450	chr20:46988653-46999381	-	-	0	0	0	OK	0	0	0	OK	0	0	0	OK	0	0	0	OK	0	0	0	OK	0	0
1792	chr3	9004697	9005696	+	0	NA	promoter-TSS (NM_020165)	promoter-TSS (NM_020165)	-37	NM_020165	56852	Hs.375684	NM_020165	ENSG00000070950	RAD18	RNF73	RAD18, E3 ubiquitin protein ligase	protein-coding	RAD18	-	-	RAD18	RAD18	TSS13231	chr3:8918879-9005159	-	-	21.4691	17.7885	25.1497	OK	8.7211	7.07287	10.3693	OK	16.7835	13.8266	19.7404	OK	9.01417	7.31987	10.7085	OK	14.5864	11.9997	17.1732	OK	3.49104	2.72576
662	chr7	32991758	32992757	+	0	NA	Intergenic	AluSx|SINE|Alu	-4759	NM_007270	11328	Hs.103934	NM_007270	ENSG00000122642	FKBP9	FKBP60|FKBP63|PPIase	FK506 binding protein 9	protein-coding	FKBP9	-	-	FKBP9	FKBP9	TSS16972,TSS816	chr7:32997015-33046543	-	-	20.2746	16.5491	24.0002	OK	27.1006	22.2896	31.9117	OK	17.9837	14.6387	21.3287	OK	18.8909	15.4091	22.3726	OK	23.8806	19.5819	28.1792	OK	35.7418	29.5417
168	chr17	1359003	1360002	+	0	NA	promoter-TSS (NM_005206)	promoter-TSS (NM_005206)	59	NM_016823	1398	Hs.461896	NM_005206	ENSG00000167193	CRK	CRKII|p38	CRK proto-oncogene, adaptor protein	protein-coding
6180	chr6	4372837	4373836	+	0	NA	Intergenic	Intergenic	-54900	NR_106988	102465753		NR_106988	ENSG00000280494	MIR7641-2	B-ATF|hsa-mir-7641-2	microRNA 7641-2	ncRNA	MIR7641-2	-	-	MIR7641-2	MIR7641-2	TSS10459,TSS11276,TSS13556,TSS16091,TSS17309,TSS18236,TSS18633,TSS18916,TSS20202,TSS21422,TSS21884,TSS24507,TSS24976,TSS25776,TSS26758,TSS28385,TSS28957,TSS30345,TSS30662,TSS31442,TSS34126,TSS6460,TSS7487,TSS7756,TSS8390,TSS9081,TSS9493	chr1:228746044-228746094	-	-	0	0	0	OK	0	0	0	OK	0	0	0	OK	0	0	0	OK	0	0	0	OK	0	0
4789	chr9	132196026	132197025	+	0	NA	Intergenic	MLT1J|LTR|ERVL-MaLR	-54414	NR_038955	100506190	Hs.529860	NR_038955		LINC00963	-	long intergenic non-protein coding RNA 963	ncRNA	LINC00963	-	-	LINC00963	LINC00963	TSS3856	chr9:132250938-132275965	-	-	2.24133	1.48902	2.99364	OK	2.95116	2.0523	3.85001	OK	2.81224	1.95296	3.67152	OK	3.76904	2.70441	4.83366	OK	3.01452	2.10122	3.92782	OK	4.25126	3.07498
1518	chr8	110454914	110455913	+	0	NA	intron (NM_177531, intron 36 of 77)	MIRc|SINE|MIR	80707	NM_177531	93035	Hs.170128	NM_177531	ENSG00000205038	PKHD1L1	PKHDL1	polycystic kidney and hepatic disease 1 (autosomal recessive)-like 1	protein-coding	PKHD1L1	-	-	PKHD1L1	PKHD1L1	TSS34029	chr8:110374705-110543500	-	-	0	0	0	OK	0	0	0	OK	0	0	0	OK	0	0	0	OK	0.00131882	0	0.0099839	OK	0.00408698	0
3447	chr7	119645458	119646457	+	0	NA	Intergenic	AluY|SINE|Alu	-98528	NR_131962	105375475	Hs.566654	NR_131960	ENSG00000225546	LVCAT5	-	liver cancer-associated transcript 5	ncRNA
3444	chr2	45346592	45347591	+	0	NA	Intergenic	Intergenic	-110549	NM_016932	10736	Hs.101937	NM_016932	ENSG00000170577	SIX2	-	SIX homeobox 2	protein-coding	SIX2	-	-	SIX2	SIX2	TSS16984	chr2:45232323-45236542	-	-	2.53053	1.63448	3.42657	OK	2.97738	2.00776	3.947	OK	1.80101	1.12088	2.48115	OK	1.38634	0.799066	1.9736	OK	2.16048	1.35185	2.96911	OK	3.74997	2.60972
178	chr1	161368999	161369998	+	0	NA	Intergenic	CpG	-31825	NM_001013625	257177	Hs.534593	NM_001013625	ENSG00000188931	CFAP126	C1orf192|Flattop|Fltp	cilia and flagella associated protein 126	protein-coding	CFAP126	-	-	CFAP126	CFAP126	TSS24320	chr1:161284165-161337673	-	-	0.0353952	0	0.291411	OK	0.176148	0	0.751658	OK	0.134292	0	0.704363	OK	0.254415	0	1.06404	OK	0.268683	0	1.05121	OK	0.0704046	0
3156	chrX	101905661	101906660	+	0	NA	promoter-TSS (NM_001099410)	promoter-TSS (NM_001099410)	-134	NM_001099411	9737	Hs.729265	NM_014710	ENSG00000198932	GPRASP1	GASP|GASP-1|GASP1	G protein-coupled receptor associated sorting protein 1	protein-coding
2728	chr1	156099682	156100681	+	0	NA	intron (NM_001282624, intron 2 of 10)	intron (NM_001282624, intron 2 of 10)	4273	NM_001257374	4000	Hs.594444	NM_005572	ENSG00000160789	LMNA	CDCD1|CDDC|CMD1A|CMT2B1|EMD2|FPL|FPLD|FPLD2|HGPS|IDC|LDP1|LFP|LGMD1B|LMN1|LMNC|LMNL1|MADA|PRO1	lamin A/C	protein-coding
3992	chr1	246887289	246888288	+	0	NA	exon (NM_016002, exon 1 of 12)	exon (NM_016002, exon 1 of 12)	410	NM_016002	51097	Hs.498397	NM_016002	ENSG00000143653	SCCPDH	CGI-49|NET11	saccharopine dehydrogenase (putative)	protein-coding	SCCPDH	-	-	SCCPDH	SCCPDH	TSS28631	chr1:246887377-246931440	-	-	33.7098	27.6083	39.8114	OK	32.5741	26.6334	38.5149	OK	36.133	29.5913	42.6746	OK	35.8327	29.3816	42.2837	OK	33.825	27.7046	39.9453	OK	25.6194	20.8193
3439	chr1	186125156	186126155	+	0	NA	intron (NM_031935, intron 97 of 106)	L1M5|LINE|L1	-139750	NM_001127709	10216	Hs.647723	NM_005807	ENSG00000116690	PRG4	CACP|HAPO|JCAP|MSF|SZP	proteoglycan 4	protein-coding
124	chr6	130908935	130909934	+	0	NA	Intergenic	L2b|LINE|L2	151172	NM_052913	114801	Hs.591341	NM_052913	ENSG00000164484	TMEM200A	KIAA1913|TTMA|TTMC	transmembrane protein 200A	protein-coding	TMEM200A	-	-	TMEM200A	TMEM200A	TSS15408,TSS15800,TSS30574	chr6:130687425-130764210	-	-	23.4113	19.1591	27.6635	OK	6.83191	5.2894	8.37442	OK	51.5835	42.7742	60.3928	OK	28.6235	23.4814	33.7655	OK	6.0208	4.63568	7.40593	OK	10.8165	8.60459
6267	chr9	134086956	134087955	+	0	NA	intron (NM_005085, intron 30 of 35)	MER11B|LTR|ERVK	21953	NM_001318325	8021	Hs.654530	NM_005085	ENSG00000126883	NUP214	CAIN|CAN	nucleoporin 214	protein-coding
1429	chr20	43538279	43539278	+	0	NA	promoter-TSS (NR_134983)	promoter-TSS (NR_134983)	77	NM_001124756	80336	Hs.641481	NM_001124756	ENSG00000101104	PABPC1L	C20orf119|EPAB|PABPC1L1|dJ1069P2.3	poly(A) binding protein cytoplasmic 1 like	protein-coding	PABPC1L	-	-	PABPC1L	PABPC1L	TSS7002	chr20:43538702-43567962	-	-	1.60241	0.994094	2.21072	OK	1.04072	0.58625	1.49518	OK	2.71865	1.88068	3.55662	OK	1.28008	0.769676	1.79049	OK	0.833556	0.435978	1.23114	OK	0.752316	0.377263
4259	chr2	28935063	28936062	+	0	NA	Intergenic	AluSz|SINE|Alu	-39052	NM_206876	5500	Hs.702907	NM_002709	ENSG00000213639	PPP1CB	HEL-S-80p|PP-1B|PP1B|PP1beta|PPP1CD	protein phosphatase 1 catalytic subunit beta	protein-coding
5702	chr1	110753466	110754465	+	0	NA	non-coding (NR_036437, exon 1 of 5)	non-coding (NR_036437, exon 1 of 5)	629	NM_004978	3749	Hs.153521	NM_004978	ENSG00000116396	KCNC4	C1orf30|HKSHIIIC|KSHIIIC|KV3.4	potassium voltage-gated channel subfamily C member 4	protein-coding	KCNC4	-	-	KCNC4	KCNC4	TSS26979	chr1:110753335-110776674	-	-	0.402365	0.197521	0.607208	OK	0.0705156	0	0.164845	OK	0.296436	0.127941	0.464932	OK	0	0	0	OK	0.176178	0.0279911	0.324364	OK	0.110516	0
1974	chr17	53922320	53923319	+	0	NA	Intergenic	CpG	94353	NM_001102402	58488	Hs.285218	NM_021213	ENSG00000141179	PCTP	PC-TP|STARD2	phosphatidylcholine transfer protein	protein-coding
2536	chr7	129650354	129651353	+	0	NA	Intergenic	Intergenic	40438	NM_001282190	51530	Hs.194157	NM_016478	ENSG00000091732	ZC3HC1	HSPC216|NIPA	zinc finger C3HC-type containing 1	protein-coding
5856	chr18	68001127	68002126	+	0	NA	Intergenic	MLT1A0|LTR|ERVL-MaLR	-1049	NR_126336	101927481	Hs.633706	NR_126336	ENSG00000266258	LINC01909	-	long intergenic non-protein coding RNA 1909	ncRNA
4988	chr1	20130902	20131901	+	0	NA	Intergenic	Intergenic	-4991	NM_181719	255104	Hs.656313	NM_181719	ENSG00000162542	TMCO4	-	transmembrane and coiled-coil domains 4	protein-coding	TMCO4	-	-	TMCO4	TMCO4	TSS19586	chr1:20008705-20126410	-	-	5.76954	4.40714	7.13194	OK	5.73534	4.39702	7.07366	OK	3.82047	2.85846	4.78247	OK	2.97654	2.16742	3.78565	OK	6.54875	5.06109	8.03641	OK	5.45501	4.16401
4350	chr6	41901917	41902916	+	0	NA	TTS (NM_001760)	TTS (NM_001760)	7170	NM_001760	896	Hs.534307	NM_001760	ENSG00000112576	CCND3	-	cyclin D3	protein-coding	CCND3	-	-	CCND3	CCND3	TSS13819,TSS16830	chr6:41902670-42016632	-	-	143.561	119.888	167.235	OK	56.8017	46.934	66.6694	OK	108.192	90.1454	126.239	OK	54.3861	44.8606	63.9116	OK	121.247	101.083	141.411	OK	49.9812	41.0227
3611	chr3	41240513	41241512	+	0	NA	promoter-TSS (NM_001904)	promoter-TSS (NM_001904)	70	NM_001098209	1499	Hs.476018	NM_001904	ENSG00000168036	CTNNB1	CTNNB|MRD19|armadillo	catenin beta 1	protein-coding
2483	chr3	13921764	13922763	+	0	NA	promoter-TSS (NM_004625)	promoter-TSS (NM_004625)	-645	NM_004625	7476	Hs.72290	NM_004625	ENSG00000154764	WNT7A	-	Wnt family member 7A	protein-coding	WNT7A	-	-	WNT7A	WNT7A	TSS33190	chr3:13860081-13921618	-	-	0	0	0	OK	0	0	0	OK	0	0	0	OK	0	0	0	OK	0	0	0	OK	0	0
1374	chr11	67140452	67141451	+	0	NA	intron (NM_001166212, intron 1 of 2)	CpG	255	NM_013246	23529	Hs.502977	NM_013246	ENSG00000175505	CLCF1	BSF-3|BSF3|CISS2|CLC|NNT-1|NNT1|NR6	cardiotrophin-like cytokine factor 1	protein-coding	CLCF1	-	-	CLCF1	CLCF1	TSS10595,TSS712	chr11:67085309-67159158	-	-	18.44	13.1733	23.7067	OK	7.43071	3.82905	11.0324	OK	22.9948	16.6905	29.299	OK	10.3315	5.11954	15.5436	OK	14.4023	8.87593	19.9286	OK	11.4001	5.01184
6098	chr11	116818578	116819577	+	0	NA	intron (NM_025164, intron 3 of 23)	AluJo|SINE|Alu	-110411	NM_001318021	335	Hs.93194	NM_000039	ENSG00000118137	APOA1	apo(a)	apolipoprotein A1	protein-coding
2807	chr17	74275128	74276127	+	0	NA	intron (NR_130649, intron 12 of 18)	intron (NR_130649, intron 12 of 18)	14341	NM_182565	283991	Hs.744981	NM_182565	ENSG00000185262	UBALD2	FAM100B	UBA like domain containing 2	protein-coding	UBALD2	-	-	UBALD2	UBALD2	TSS29103	chr17:74261285-74267379	-	-	0.353754	0.0268119	0.680696	OK	1.23325	0.616196	1.85031	OK	0.21891	0	0.461946	OK	1.45117	0.776783	2.12556	OK	0.816713	0.330415	1.30301	OK	1.40326	0.731352
2303	chr9	121505192	121506191	+	0	NA	Intergenic	Intergenic	626048	NM_014618	1620	Hs.532316	NM_014618	ENSG00000078725	BRINP1	DBC1|DBCCR1|FAM5A	BMP/retinoic acid inducible neural specific 1	protein-coding	BRINP1	-	-	BRINP1	BRINP1	TSS30232	chr9:121928907-122131739	-	-	0.00710091	0	0.0489221	OK	0	0	0	OK	0.0399267	0	0.109778	OK	0	0	0	OK	0	0	0	OK	0	0
6679	chr4	2061459	2062458	+	0	NA	intron (NM_178557, intron 1 of 2)	CpG-19495	719	NM_178557	339983	Hs.318529	NM_178557	ENSG00000185818	NAT8L	CML3|NACED|NAT8-LIKE	N-acetyltransferase 8 like	protein-coding	NAT8L	-	-	NAT8L	NAT8L	TSS12857	chr4:2061238-2070816	-	-	0.0129669	0	0.0368373	OK	0.0156763	0	0.0525445	OK	0	0	0	OK	0.0268529	0	0.0664961	OK	0.125304	0.0401869	0.210421	OK	0.0591939	0.00308189
5672	chr19	16332648	16333647	+	0	NA	intron (NM_001130524, intron 6 of 12)	AluJo|SINE|Alu	24482	NM_032493	8907	Hs.71040	NM_032493	ENSG00000072958	AP1M1	AP47|CLAPM2|CLTNM|MU-1A	adaptor related protein complex 1 mu 1 subunit	protein-coding	AP1M1	-	-	AP1M1	AP1M1	TSS972	chr19:16308664-16346156	-	-	78.9321	65.5678	92.2963	OK	70.9336	58.9025	82.9646	OK	70.5798	58.6052	82.5543	OK	72.9916	60.6178	85.3655	OK	77.8249	64.6375	91.0124	OK	65.822	54.6378
2259	chr14	23583771	23584770	+	0	NA	Intergenic	Intergenic	4550	NM_001805	1053	Hs.558308	NM_001805	ENSG00000092067	CEBPE	C/EBP-epsilon|CRP1	CCAAT/enhancer binding protein epsilon	protein-coding	CEBPE	-	-	CEBPE	CEBPE	TSS21847	chr14:23586514-23588820	-	-	0	0	0	OK	0	0	0	OK	0	0	0	OK	0	0	0	OK	0	0	0	OK	0	0
2212	chr5	109025308	109026307	+	0	NA	5' UTR (NM_002372, exon 1 of 22)	5' UTR (NM_002372, exon 1 of 22)	740	NM_002372	4124	Hs.432822	NM_002372	ENSG00000112893	MAN2A1	AMan II|GOLIM7|MANA2|MANII	mannosidase alpha class 2A member 1	protein-coding	MAN2A1	-	-	MAN2A1	MAN2A1	TSS12739	chr5:109025066-109205326	-	-	9.20255	7.51797	10.8871	OK	7.38206	5.98004	8.78408	OK	4.82195	3.82687	5.81703	OK	4.70514	3.74898	5.66131	OK	11.298	9.26747	13.3285	OK	5.81312	4.67495
716	chr2	235158239	235159238	+	0	NA	Intergenic	Intergenic	199392	NM_006944	6694	Hs.444488	NM_006944	ENSG00000072080	SPP2	SPP-24|SPP24	secreted phosphoprotein 2	protein-coding	SPP2	-	-	SPP2	SPP2	TSS5304	chr2:234959345-234985776	-	-	0	0	0	OK	0.0769537	0	0.236486	OK	0.0275274	0	0.164241	OK	0.122051	0	0.357863	OK	0.0240227	0	0.16052	OK	0	0
6694	chr5	133450103	133451102	+	0	NA	promoter-TSS (NR_033449)	promoter-TSS (NR_033449)	213	NM_001346425	6932	Hs.573153	NM_003202	ENSG00000081059	TCF7	TCF-1	transcription factor 7 (T-cell specific, HMG-box)	protein-coding
1886	chr5	36690029	36691028	+	0	NA	Intergenic	CpG	84071	NM_001289940	6507	Hs.481918	NM_004172	ENSG00000079215	SLC1A3	EA6|EAAT1|GLAST|GLAST1	solute carrier family 1 member 3	protein-coding
1972	chr4	103422554	103423553	+	0	NA	promoter-TSS (NM_001319226)	promoter-TSS (NM_001319226)	-2	NM_001319226	4790	Hs.618430	NM_003998	ENSG00000109320	NFKB1	CVID12|EBP-1|KBF1|NF-kB1|NF-kappa-B|NF-kappaB|NFKB-p105|NFKB-p50|NFkappaB|p105|p50	nuclear factor kappa B subunit 1	protein-coding
5294	chr13	33859407	33860406	+	0	NA	promoter-TSS (NM_178006)	promoter-TSS (NM_178006)	-5	NM_178006	90627	Hs.156551	NM_052851	ENSG00000133121	STARD13	ARHGAP37|DLC2|GT650|LINC00464	StAR related lipid transfer domain containing 13	protein-coding
940	chr1	85795569	85796568	+	0	NA	intron (NM_001330655, intron 4 of 5)	intron (NM_001330655, intron 4 of 5)	-53481	NM_001320715	8915	Hs.193516	NM_003921	ENSG00000142867	BCL10	CARMEN|CIPER|CLAP|IMD37|c-E10|mE10	B-cell CLL/lymphoma 10	protein-coding
685	chr7	150777879	150778878	+	0	NA	promoter-TSS (NM_001258461)	promoter-TSS (NM_001258461)	-408	NM_006712	10922	Hs.647094	NM_006712	ENSG00000164896	FASTK	FAST	Fas activated serine/threonine kinase	protein-coding	FASTK	-	-	FASTK	FASTK	TSS13329	chr7:150773707-150777970	-	-	84.6026	70.0344	99.1708	OK	88.0222	73.0988	102.946	OK	92.4665	76.8408	108.092	OK	102.262	85.0427	119.481	OK	100.521	83.7941	117.248	OK	115.071	95.6678
5607	chrX	96343708	96344707	+	0	NA	intron (NM_007309, intron 19 of 26)	intron (NM_007309, intron 19 of 26)	205300	NM_013347	29935	Hs.659349	NM_013347	ENSG00000204086	RPA4	HSU24186	replication protein A4	protein-coding	RPA4	-	-	RPA4	RPA4	TSS14749	chrX:95939661-96855597	-	-	0.195622	0	0.695942	OK	0.107143	0	0.472673	OK	0.0782434	0	0.399827	OK	0.0144458	0	0.137153	OK	0.248713	0	0.884388	OK	0.217424	0
4169	chr12	102232498	102233497	+	0	NA	Intergenic	LTR41B|LTR|ERVL	-8352	NM_024312	79158	Hs.46850	NM_024312	ENSG00000111670	GNPTAB	GNPTA|ICD	N-acetylglucosamine-1-phosphate transferase alpha and beta subunits	protein-coding	GNPTAB	-	-	GNPTAB	GNPTAB	TSS5	chr12:102139274-102224645	-	-	6.76471	5.44828	8.08113	OK	8.71013	7.06349	10.3568	OK	4.57929	3.61232	5.54627	OK	3.35417	2.60788	4.10046	OK	7.52822	6.07844	8.978	OK	5.52317	4.40776
21	chr6	113683563	113684562	+	0	NA	Intergenic	Intergenic	287215	NR_125844	101927686	Hs.402044	NR_125844	ENSG00000230943	LOC101927686	-	uncharacterized LOC101927686	ncRNA	LOC101927686	-	-	LOC101927686	LOC101927686	TSS30514	chr6:113944736-113971277	-	-	0	0	0	OK	0	0	0	OK	0	0	0	OK	0	0	0	OK	0	0	0	OK	0	0
5313	chr5	176557360	176558359	+	0	NA	Intergenic	L2c|LINE|L2	-2221	NM_172349	64324	Hs.106861	NM_022455	ENSG00000165671	NSD1	ARA267|KMT3B|SOTOS|SOTOS1|STO	nuclear receptor binding SET domain protein 1	protein-coding
4862	chr5	140105249	140106248	+	0	NA	promoter-TSS (NR_026705)	promoter-TSS (NR_026705)	4	NR_026705	56662		NR_026705	ENSG00000202515	VTRNA1-3	HVG3|VAULTRC3|VR3|hvg-3	vault RNA 1-3	ncRNA	VTRNA1-3	-	-	VTRNA1-3	VTRNA1-3	TSS23777	chr5:140105743-140105831	-	-	12.8558	10.659	15.0525	OK	15.5475	13.3472	17.7477	OK	0	0	0	OK	10.6325	8.43902	12.826	OK	12.9237	10.7282	15.1193	OK	7.28367	5.10416
523	chr17	59474297	59475296	+	0	NA	intron (NR_125750, intron 1 of 2)	CpG	2171	NR_125749	103689912	Hs.410998	NR_125749	ENSG00000267280	TBX2-AS1	-	TBX2 antisense RNA 1	ncRNA	TBX2-AS1	-	-	TBX2-AS1	TBX2-AS1	TSS29580	chr17:59470816-59476967	-	-	1.26026	0.0553165	2.4652	OK	2.75025	0.888956	4.61155	OK	0.927653	0	1.94889	OK	2.80924	1.19651	4.42197	OK	1.05149	0	2.24403	OK	5.94938	3.27023
4360	chr2	96908653	96909652	+	0	NA	TTS (NR_046322)	TTS (NR_046322)	22599	NM_017849	55654	Hs.164303	NM_017849	ENSG00000135956	TMEM127	-	transmembrane protein 127	protein-coding	TMEM127	-	-	TMEM127	TMEM127	TSS18789	chr2:96915945-96931751	-	-	26.3905	21.7982	30.9827	OK	28.489	23.6209	33.3572	OK	17.7011	14.5051	20.8971	OK	13.9426	11.3448	16.5404	OK	24.5823	20.302	28.8625	OK	25.6676	21.1932
3823	chr16	11548257	11549256	+	0	NA	Intergenic	HAL1|LINE|L1	-10360	NR_110907	101927131	Hs.569654	NR_110907	ENSG00000262999	LOC101927131	-	uncharacterized LOC101927131	ncRNA	LOC101927131	-	-	LOC101927131	LOC101927131	TSS6591	chr16:11559115-11567030	-	-	0	0	0	OK	0.00932505	0	0.0663406	OK	0	0	0	OK	0	0	0	OK	0	0	0	OK	0	0
2377	chr12	45209017	45210016	+	0	NA	intron (NM_001145110, intron 4 of 20)	AluSg|SINE|Alu	59928	NM_001145109	4753	Hs.505326	NM_006159	ENSG00000184613	NELL2	NRP2	neural EGFL like 2	protein-coding
3975	chr5	166635587	166636586	+	0	NA	Intergenic	Intergenic	-40680	NR_134280	101927908		NR_134280	ENSG00000253469	LOC101927908	-	uncharacterized LOC101927908	ncRNA
6344	chr21	10569918	10570917	+	0	NA	Intergenic	AluJb|SINE|Alu	420526	NM_001290224	7179	Hs.122986	NM_199259	ENSG00000274391	TPTE	CT44|PTEN2	transmembrane phosphatase with tensin homology	protein-coding
1460	chr11	69457825	69458824	+	0	NA	intron (NM_053056, intron 2 of 4)	CpG-4502	2451	NM_053056	595	Hs.523852	NM_053056	ENSG00000110092	CCND1	BCL1|D11S287E|PRAD1|U21B31	cyclin D1	protein-coding	CCND1	-	-	CCND1	CCND1	TSS15427	chr11:69455872-69469242	-	-	279.939	235.603	324.276	OK	106.184	89.0718	123.296	OK	337.931	284.465	391.397	OK	137.661	115.635	159.687	OK	201.635	169.599	233.671	OK	82.7671	69.3254
453	chr4	140476225	140477224	+	0	NA	intron (NR_131339, intron 1 of 3)	CpG	1199	NR_131339	80854	Hs.480792	NM_030648	ENSG00000145391	SETD7	KMT7|SET7|SET7/9|SET9	SET domain containing lysine methyltransferase 7	protein-coding
2500	chr16	89366441	89367440	+	0	NA	intron (NR_045839, intron 5 of 9)	intron (NR_045839, intron 5 of 9)	4404	NR_136339	105371414	Hs.657381	NR_136339		LOC105371414	-	uncharacterized LOC105371414	ncRNA
3937	chr9	110593689	110594688	+	0	NA	Intergenic	Intergenic	-342187	NM_004235	9314	Hs.376206	NM_004235	ENSG00000136826	KLF4	EZF|GKLF	Kruppel like factor 4	protein-coding	KLF4	-	-	KLF4	KLF4	TSS29402	chr9:110247132-110252047	-	-	3.73234	2.69533	4.76934	OK	2.00129	1.34588	2.65669	OK	2.59833	1.81527	3.3814	OK	1.50791	0.971123	2.0447	OK	3.22965	2.30881	4.1505	OK	6.96297	5.31867
1202	chr11	47781845	47782844	+	0	NA	intron (NM_015308, intron 2 of 16)	AluSx|SINE|Alu	6686	NM_001318339	23360	Hs.6834	NM_015308	ENSG00000109920	FNBP4	FBP30	formin binding protein 4	protein-coding
3162	chrX	134476321	134477320	+	0	NA	5' UTR (NM_007131, exon 1 of 7)	5' UTR (NM_007131, exon 1 of 7)	1192	NM_007131	7626	Hs.371717	NM_007131	ENSG00000186376	ZNF75D	D8C6|ZKSCAN24|ZNF75|ZNF82|ZSCAN28	zinc finger protein 75D	protein-coding	ZNF75D	-	-	ZNF75D	ZNF75D	TSS3100,TSS743	chrX:134382535-134478012	-	-	2.45914	1.78719	3.1311	OK	3.13917	2.33251	3.94583	OK	3.10957	2.26765	3.95149	OK	3.51849	2.5093	4.52767	OK	2.38765	1.73523	3.04007	OK	3.79774	2.80962
3895	chrX	40704233	40705232	+	0	NA	Intergenic	Intergenic	-12283	NR_027761	100132831	Hs.729923	NR_027761		LOC100132831	-	A20-binding inhibitor of NF-kappaB activation 2 pseudogene	pseudo	LOC100132831	-	-	LOC100132831	LOC100132831	TSS12692	chrX:40690469-40692449	-	-	0.14789	0	0.305063	OK	0.129902	0	0.276984	OK	0.116241	0	0.254815	OK	0.137502	0	0.282449	OK	0.0486131	0	0.157876	OK	0.119183	0
3303	chr1	171840006	171841005	+	0	NA	intron (NM_015569, intron 1 of 20)	MER20B|DNA|hAT-Charlie	7173	NR_046845	100874284		NR_046845	ENSG00000233540	DNM3-IT1	-	DNM3 intronic transcript 1	ncRNA	DNM3-IT1	-	-	DNM3-IT1	DNM3-IT1	TSS31853	chr1:171810617-172381857	-	-	0	0	0	OK	0.171027	0	0.60143	OK	0.133118	0	0.546713	OK	0	0	0	OK	0	0	0	OK	0	0
351	chr20	19495440	19496439	+	0	NA	intron (NM_020689, intron 2 of 16)	Charlie4a|DNA|hAT-Charlie	-230699	NR_024564	100130264	Hs.683814	NR_024564	ENSG00000179447	LOC100130264	-	uncharacterized LOC100130264	ncRNA	LOC100130264	-	-	LOC100130264	LOC100130264	TSS11482	chr20:19193289-19703541	-	-	0.0118668	0	0.0954451	OK	0.0120355	0	0.085284	OK	0.012319	0	0.0966873	OK	0.0113688	0	0.08424	OK	0.012603	0	0.0854476	OK	0.0134572	0
2838	chr5	137368421	137369420	+	0	NA	promoter-TSS (NM_016603)	promoter-TSS (NM_016603)	-118	NM_001101801	51306	Hs.567453	NM_016603	ENSG00000031003	FAM13B	ARHGAP49|C5orf5|FAM13B1|KHCHP|N61	family with sequence similarity 13 member B	protein-coding
595	chr17	76036834	76037833	+	0	NA	intron (NM_018996, intron 3 of 20)	intron (NM_018996, intron 3 of 20)	37015	NM_001142640	57690	Hs.406810	NM_018996	ENSG00000078687	TNRC6C	-	trinucleotide repeat containing 6C	protein-coding
6337	chr16	56660994	56661993	+	0	NA	TTS (NM_175617)	TTS (NM_175617)	1908	NM_175617	4493	Hs.744893	NM_175617	ENSG00000169715	MT1E	MT-1E|MT-IE|MT1|MTD	metallothionein 1E	protein-coding	MT1E	-	-	MT1E	MT1E	TSS31531	chr16:56659584-56661024	-	-	88.6022	68.8633	108.341	OK	77.6195	60.0212	95.2178	OK	83.375	65.1735	101.576	OK	115.598	92.0156	139.18	OK	40.0919	29.7976	50.3863	OK	5.24917	2.57809
2926	chr7	92271189	92272188	+	0	NA	intron (NM_001145306, intron 5 of 7)	intron (NM_001145306, intron 5 of 7)	-51980	NR_109929	257415	Hs.18564	NM_152789	ENSG00000234545	FAM133B	-	family with sequence similarity 133 member B	protein-coding
1854	chr12	48152460	48153459	+	0	NA	promoter-TSS (NM_006105)	promoter-TSS (NM_006105)	-70	NM_001098531	10411	Hs.8578	NM_006105	ENSG00000079337	RAPGEF3	CAMP-GEFI|EPAC|EPAC1|HSU79275|bcm910	Rap guanine nucleotide exchange factor 3	protein-coding
1498	chr5	83479730	83480729	+	0	NA	intron (NM_001278642, intron 2 of 9)	LTR85b|LTR|Gypsy?	200456	NM_005711	10085	Hs.482730	NM_005711	ENSG00000164176	EDIL3	DEL1	EGF like repeats and discoidin domains 3	protein-coding	EDIL3	-	-	EDIL3	EDIL3	TSS7895	chr5:83236413-83680685	-	-	68.3527	57.2845	79.421	OK	75.1993	63.0024	87.3962	OK	153.353	128.998	177.708	OK	91.9628	77.1567	106.769	OK	72.7337	61.0317	84.4356	OK	86.7337	72.8278
835	chr3	142118998	142119997	+	0	NA	intron (NM_019001, intron 18 of 41)	intron (NM_019001, intron 18 of 41)	47407	NM_001282857	54464	Hs.435103	NM_019001	ENSG00000114127	XRN1	2018-09-01	5'-3' exoribonuclease 1	protein-coding
5874	chr6	92167971	92168970	+	0	NA	Intergenic	Intergenic	-62908	NR_039786	100616174		NR_039786	ENSG00000263734	MIR4643	-	microRNA 4643	ncRNA	MIR4643	-	-	MIR4643	MIR4643	TSS18964	chr6:92231377-92231455	-	-	0	0	0	OK	0	0	0	OK	0	0	0	OK	0	0	0	OK	0	0	0	OK	0	0
1267	chr10	91217831	91218830	+	0	NA	intron (NR_120614, intron 1 of 2)	intron (NR_120614, intron 1 of 2)	2582	NR_120614	101926906	Hs.568874	NR_120614	ENSG00000234452	SLC16A12-AS1	-	SLC16A12 antisense RNA 1	ncRNA	SLC16A12-AS1	-	-	SLC16A12-AS1	SLC16A12-AS1	TSS25442	chr10:91190050-91295313	-	-	0	0	0	OK	0	0	0	OK	0	0	0	OK	0	0	0	OK	0.0733526	0	0.415689	OK	0.00423569	0
4620	chr11	80972493	80973492	+	0	NA	Intergenic	MIRc|SINE|MIR	-499146	NR_120570	101928944	Hs.547927	NR_120570	ENSG00000255178	LOC101928944	-	uncharacterized LOC101928944	ncRNA	LOC101928944	-	-	LOC101928944	LOC101928944	TSS16998	chr11:80462243-80473846	-	-	0	0	0	OK	0	0	0	OK	0	0	0	OK	0	0	0	OK	0	0	0	OK	0	0
4015	chr11	96438962	96439961	+	0	NA	Intergenic	MLT1J1|LTR|ERVL-MaLR	197872	NR_135097	105369443	Hs.599377	NR_135097	ENSG00000256684	LOC105369443	-	uncharacterized LOC105369443	ncRNA
113	chr17	19410945	19411944	+	0	NA	Intergenic	Intergenic	-25723	NM_018242	55244	Hs.232054	NM_018242	ENSG00000142494	SLC47A1	MATE1	solute carrier family 47 member 1	protein-coding	SLC47A1	-	-	SLC47A1	SLC47A1	TSS13125	chr17:19437166-19482346	-	-	1.81022	1.26861	2.35183	OK	2.501	1.81223	3.18978	OK	0.669997	0.393474	0.94652	OK	0.652544	0.379888	0.925199	OK	1.29108	0.864859	1.7173	OK	0.381493	0.183657
901	chr14	96968151	96969150	+	0	NA	promoter-TSS (NM_001252006)	promoter-TSS (NM_001252006)	13	NR_122121	730202	Hs.647565	NR_122121		LOC730202	-	uncharacterized LOC730202	ncRNA	LOC730202	-	-	LOC730202	LOC730202	TSS5731	chr14:96967984-96968663	-	-	0.764708	0	1.62816	OK	1.29004	0.228311	2.35176	OK	0.901109	0	1.81958	OK	1.62512	0.430814	2.81942	OK	1.19493	0.175028	2.21483	OK	1.53828	0.319335
2191	chrX	46441750	46442749	+	0	NA	intron (NM_019886, intron 1 of 1)	intron (NM_019886, intron 1 of 1)	9127	NM_019886	56548	Hs.129955	NM_019886	ENSG00000147119	CHST7	C6ST-2|GST-5	carbohydrate sulfotransferase 7	protein-coding	CHST7	-	-	CHST7	CHST7	TSS20201	chrX:46433121-46457931	-	-	14.2134	10.989	17.4378	OK	10.4028	7.97362	12.832	OK	12.0936	9.34032	14.8468	OK	5.2712	3.81918	6.72321	OK	13.0679	10.1212	16.0146	OK	7.52923	5.62962
5487	chr3	141999920	142000919	+	0	NA	Intergenic	HUERS-P3b-int|LTR|ERV1	-55970	NM_001039547	256356	Hs.135904	NM_152776	ENSG00000175066	GK5	-	glycerol kinase 5 (putative)	protein-coding
6388	chr1	76081220	76082219	+	0	NA	promoter-TSS (NM_001320283)	promoter-TSS (NM_001320283)	-25	NM_001320283	204962	Hs.654821	NM_152697	ENSG00000137968	SLC44A5	CTL5	solute carrier family 44 member 5	protein-coding
1056	chr17	73245994	73246993	+	0	NA	intron (NM_001291641, intron 1 of 17)	intron (NM_001291641, intron 1 of 17)	11249	NM_014001	23163	Hs.87726	NM_014001	ENSG00000125447	GGA3	-	golgi associated, gamma adaptin ear containing, ARF binding protein 3	protein-coding	GGA3	-	-	GGA3	GGA3	TSS5273,TSS5955	chr17:73232686-73267311	-	-	4.31272	2.35031	6.27512	OK	4.37302	2.05097	6.69507	OK	4.72854	2.72797	6.7291	OK	5.12113	2.90145	7.34081	OK	4.6702	2.22663	7.11376	OK	4.69961	2.52969
3664	chr9	95590589	95591588	+	0	NA	intron (NR_026868, intron 7 of 9)	AluJr|SINE|Alu	19195	NR_026868	138649	Hs.643597	NM_001010925	ENSG00000187984	ANKRD19P	ANKRD19|bA526D8.2	ankyrin repeat domain 19, pseudogene	pseudo
6540	chr17	30087	31086	+	0	NA	intron (NM_003585, intron 1 of 5)	CpG	835	NM_003585	8447	Hs.551705	NM_003585	ENSG00000272636	DOC2B	DOC2BL	double C2 domain beta	protein-coding	DOC2B	-	-	DOC2B	DOC2B	TSS489	chr17:6010-31421	-	-	0	0	0	OK	0	0	0	OK	0	0	0	OK	0	0	0	OK	0	0	0	OK	0	0
3108	chr6	110161559	110162558	+	0	NA	Intergenic	AluSc5|SINE|Alu	-87639	NR_106988	102465753		NR_106988	ENSG00000280494	MIR7641-2	B-ATF|hsa-mir-7641-2	microRNA 7641-2	ncRNA	MIR7641-2	-	-	MIR7641-2	MIR7641-2	TSS10459,TSS11276,TSS13556,TSS16091,TSS17309,TSS18236,TSS18633,TSS18916,TSS20202,TSS21422,TSS21884,TSS24507,TSS24976,TSS25776,TSS26758,TSS28385,TSS28957,TSS30345,TSS30662,TSS31442,TSS34126,TSS6460,TSS7487,TSS7756,TSS8390,TSS9081,TSS9493	chr1:228746044-228746094	-	-	0	0	0	OK	0	0	0	OK	0	0	0	OK	0	0	0	OK	0	0	0	OK	0	0
6049	chr6	133135261	133136260	+	0	NA	promoter-TSS (NM_001016)	promoter-TSS (NM_001016)	52	NM_001016	6206	Hs.546289	NM_001016	ENSG00000112306	RPS12	S12	ribosomal protein S12	protein-coding	RPS12	-	-	RPS12	RPS12	TSS16436	chr6:133135707-133138703	-	-	104.972	82.4258	127.519	OK	105.127	82.4217	127.832	OK	152.58	122.449	182.711	OK	172.554	139.325	205.783	OK	119.368	95.0377	143.698	OK	130.684	103.98
4365	chr8	124428645	124429644	+	0	NA	exon (NM_018024, exon 1 of 6)	exon (NM_018024, exon 1 of 6)	179	NM_001283024	55093	Hs.18029	NM_018024	ENSG00000156795	WDYHV1	C8orf32	WDYHV motif containing 1	protein-coding
4285	chr1	2071202	2072201	+	0	NA	intron (NM_001033581, intron 2 of 14)	L1MEd|LINE|L1	35546	NM_001033582	5590	Hs.496255	NM_002744	ENSG00000067606	PRKCZ	PKC-ZETA|PKC2	protein kinase C zeta	protein-coding
5066	chr10	43709864	43710863	+	0	NA	intron (NM_145313, intron 1 of 12)	MIRc|SINE|MIR	14824	NM_001282862	221002	Hs.125293	NM_145313	ENSG00000198915	RASGEF1A	CG4853	RasGEF domain family member 1A	protein-coding
2753	chr16	89557156	89558155	+	0	NA	promoter-TSS (NM_001256182)	promoter-TSS (NM_001256182)	-686	NM_001256182	29123	Hs.335003	NM_013275	ENSG00000167522	ANKRD11	ANCO-1|ANCO1|LZ16|T13	ankyrin repeat domain 11	protein-coding
1473	chr1	93544220	93545219	+	0	NA	promoter-TSS (NM_001164392)	promoter-TSS (NM_001164392)	-73	NM_001164391	22823	Hs.31016	NM_007358	ENSG00000143033	MTF2	M96|PCL2|TDRD19A|dJ976O13.2	metal response element binding transcription factor 2	protein-coding
881	chr7	155436917	155437916	+	0	NA	promoter-TSS (NR_126344)	promoter-TSS (NR_126344)	213	NM_053043	155435	Hs.591815	NM_053043	ENSG00000184863	RBM33	PRR8	RNA binding motif protein 33	protein-coding	RBM33	-	-	RBM33	RBM33	TSS19627	chr7:155437202-155574179	-	-	1.54329	1.18141	1.90517	OK	1.76034	1.36061	2.16008	OK	1.55032	1.18763	1.913	OK	2.1692	1.69744	2.64097	OK	1.84872	1.43284	2.2646	OK	2.24672	1.76193
2461	chr19	8744542	8745541	+	0	NA	Intergenic	L1ME1|LINE|L1	64139	NM_178525	284382	Hs.209206	NM_178525	ENSG00000181786	ACTL9	HSD21	actin like 9	protein-coding	ACTL9	-	-	ACTL9	ACTL9	TSS15112	chr19:8807746-8809180	-	-	0	0	0	OK	0	0	0	OK	0	0	0	OK	0	0	0	OK	0	0	0	OK	0	0
3186	chr12	2730115	2731114	+	0	NA	intron (NM_001129830, intron 29 of 47)	L2b|LINE|L2	50772	NR_046579	100874235	Hs.667644	NR_046579	ENSG00000256271	CACNA1C-AS2	-	CACNA1C antisense RNA 2	ncRNA	CACNA1C-AS2	-	-	CACNA1C-AS2	CACNA1C-AS2	TSS29260	chr12:2162415-2807115	-	-	0	0	0	OK	0	0	0	OK	0.0543238	0	0.39569	OK	0	0	0	OK	0	0	0	OK	0	0
405	chr1	28899150	28900149	+	0	NA	intron (NM_017846, intron 8 of 8)	AluSg|SINE|Alu	5685	NR_003077	692212		NR_003077	ENSG00000221539	SNORD99	HBII-420	small nucleolar RNA, C/D box 99	snoRNA	SNORD99	-	-	SNORD99	SNORD99	TSS5870	chr1:28879528-28908366	-	-	16.7107	13.2871	20.1344	OK	0	0	0	OK	0	0	0	OK	11.6482	8.23606	15.0604	OK	10.8367	7.42637	14.2471	OK	0	0
507	chr11	809432	810431	+	0	NA	promoter-TSS (NM_001004)	promoter-TSS (NM_001004)	-5	NM_001004	6181	Hs.437594	NM_001004	ENSG00000177600	RPLP2	D11S2243E|LP2|P2|RPP2	ribosomal protein lateral stalk subunit P2	protein-coding	RPLP2	-	-	RPLP2	RPLP2	TSS898	chr11:809935-812876	-	-	373.456	305.637	441.275	OK	336.108	274.429	397.787	OK	478.894	395.175	562.614	OK	587.588	487.421	687.755	OK	416.143	342.726	489.56	OK	468.2	385.817
6092	chr3	157579360	157580359	+	0	NA	Intergenic	Intergenic	244093	NM_003030	6474	Hs.55967	NM_003030	ENSG00000168779	SHOX2	OG12|OG12X|SHOT	short stature homeobox 2	protein-coding	SHOX2	-	-	SHOX2	SHOX2	TSS17570	chr3:157813799-157823952	-	-	8.90401	6.93108	10.8769	OK	7.9112	6.12075	9.70165	OK	10.6408	8.32978	12.9519	OK	9.53933	7.45884	11.6198	OK	7.37862	5.68794	9.06929	OK	8.91689	6.93405
6110	chr12	116521602	116522601	+	0	NA	intron (NM_015335, intron 4 of 30)	intron (NM_015335, intron 4 of 30)	64358	NR_030351	693205		NR_030351	ENSG00000207967	MIR620	MIRN620|hsa-mir-620	microRNA 620	ncRNA	MIR620	-	-	MIR620	MIR620	TSS24519	chr12:116396380-116714991	-	-	0	0	0	OK	0	0	0	OK	0	0	0	OK	0	0	0	OK	0	0	0	OK	0	0
3843	chr12	125549661	125550660	+	0	NA	exon (NM_001319839, exon 1 of 17)	exon (NM_001319839, exon 1 of 17)	247	NM_001319839	65985	Hs.656073	NM_023928	ENSG00000081760	AACS	ACSF1|SUR-5	acetoacetyl-CoA synthetase	protein-coding
1734	chr10	45356474	45357473	+	0	NA	intron (NR_033842, intron 2 of 7)	intron (NR_033842, intron 2 of 7)	-49791	NM_001123376	643236	Hs.292788	NM_001123376	ENSG00000187783	TMEM72	C10orf127|KSP37	transmembrane protein 72	protein-coding	TMEM72	-	-	TMEM72	TMEM72	TSS8540	chr10:45306471-45455137	-	-	0	0	0	OK	0	0	0	OK	0	0	0	OK	0.026649	0	0.0889501	OK	0	0	0	OK	0	0
3565	chr20	33460163	33461162	+	0	NA	promoter-TSS (NM_178026)	promoter-TSS (NM_178026)	-1	NM_178026	2686	Hs.433738	NM_178026	ENSG00000131067	GGT7	D20S101|GGT4|GGTL3|GGTL5|dJ18C9.2	gamma-glutamyltransferase 7	protein-coding	GGT7	-	-	GGT7	GGT7	TSS4255	chr20:33432522-33460661	-	-	4.29302	3.15947	5.42658	OK	4.6261	3.45202	5.80018	OK	4.84354	3.64863	6.03844	OK	6.25427	4.77636	7.73219	OK	5.4164	4.08422	6.74858	OK	7.3798	5.68498
3230	chr13	37280550	37281549	+	0	NA	Intergenic	Intergenic	33000	NM_203451	400120	Hs.422375	NM_203451	ENSG00000180440	SERTM1	C13orf36	serine rich and transmembrane domain containing 1	protein-coding	SERTM1	-	-	SERTM1	SERTM1	TSS28011	chr13:37248048-37271975	-	-	0	0	0	OK	0	0	0	OK	0	0	0	OK	0	0	0	OK	0	0	0	OK	0	0
1258	chr13	20993763	20994762	+	0	NA	intron (NM_015974, intron 5 of 7)	intron (NM_015974, intron 5 of 7)	13723	NR_039721	100616304		NR_039721	ENSG00000263978	MIR4499	-	microRNA 4499	ncRNA	MIR4499	-	-	MIR4499	MIR4499	TSS8511	chr13:20977805-21100012	-	-	0	0	0	OK	0	0	0	OK	0	0	0	OK	0	0	0	OK	0	0	0	OK	0	0
4030	chr14	79464319	79465318	+	0	NA	intron (NM_001330195, intron 15 of 20)	intron (NM_001330195, intron 15 of 20)	-201507	NR_135159	105370586		NR_135159	ENSG00000258419	LOC105370586	-	uncharacterized LOC105370586	ncRNA
2313	chr11	74383696	74384695	+	0	NA	Intergenic	Intergenic	38217	NM_001304417	25884	Hs.432379	NM_015424	ENSG00000054938	CHRDL2	BNF1|CHL2	chordin like 2	protein-coding
392	chr10	107580639	107581638	+	0	NA	Intergenic	L2b|LINE|L2	-1047	NR_120625	101927549	Hs.556885	NR_120625		LOC101927549	-	uncharacterized LOC101927549	ncRNA	LOC101927549	-	-	LOC101927549	LOC101927549	TSS15742	chr10:107433367-107580091	-	-	0	0	0	OK	0	0	0	OK	0	0	0	OK	0	0	0	OK	0	0	0	OK	0	0
3653	chr17	16785362	16786361	+	0	NA	Intergenic	Intergenic	-49714	NR_029392	400578	Hs.723586	NR_029392		KRT16P2	-	keratin 16 pseudogene 2	pseudo	KRT16P2	-	-	KRT16P2	KRT16P2	TSS14193	chr17:16733796-16736147	-	-	0	0	0	OK	0	0	0	OK	0	0	0	OK	0	0	0	OK	0.0142432	0	0.100301	OK	0	0
2242	chr19	49614848	49615847	+	0	NA	Intergenic	AluSq|SINE|Alu	-2271	NM_022165	64130	Hs.221737	NM_022165	ENSG00000104863	LIN7B	LIN-7B|MALS-2|MALS2|VELI2	lin-7 homolog B, crumbs cell polarity complex component	protein-coding	LIN7B	-	-	LIN7B	LIN7B	TSS29263	chr19:49617617-49622397	-	-	3.64603	1.76793	5.52412	OK	5.99822	3.40395	8.59249	OK	5.27687	3.14246	7.41128	OK	5.89318	3.44851	8.33785	OK	8.78081	5.66782	11.8938	OK	11.538	7.59089
5463	chr17	77763707	77764706	+	0	NA	Intergenic	CpG	6709	NM_020649	57332	Hs.387258	NM_020649	ENSG00000141570	CBX8	PC3|RC1	chromobox 8	protein-coding	CBX8	-	-	CBX8	CBX8	TSS31145	chr17:77768175-77770915	-	-	2.25416	1.32005	3.18828	OK	3.7817	2.4998	5.06361	OK	3.13347	2.03568	4.23125	OK	4.68014	3.21581	6.14448	OK	4.11754	2.76126	5.47382	OK	4.56354	3.09849
5530	chr2	88498823	88499822	+	0	NA	Intergenic	Intergenic	26664	NM_018271	55258	Hs.739080	NM_018271	ENSG00000144115	THNSL2	SOFAT|THS2|TSH2	threonine synthase like 2	protein-coding	THNSL2	-	-	THNSL2	THNSL2	TSS14695,TSS24323	chr2:88469813-88486156	-	-	0	0	0	OK	0	0	0	OK	0	0	0	OK	0	0	0	OK	0	0	0	OK	0	0
2254	chr18	43573139	43574138	+	0	NA	exon (NM_024430, exon 10 of 15)	exon (NM_024430, exon 10 of 15)	-26333	NM_020964	57724	Hs.514843	NM_020964	ENSG00000152223	EPG5	HEEW1|KIAA1632|VICIS	ectopic P-granules autophagy protein 5 homolog	protein-coding	EPG5	-	-	EPG5	EPG5	TSS15350	chr18:43427573-43547305	-	-	5.39944	4.42616	6.37273	OK	3.3185	2.6816	3.9554	OK	5.34114	4.37471	6.30758	OK	2.41825	1.9306	2.90589	OK	4.12237	3.35376	4.89098	OK	1.80019	1.41892
3354	chr7	151433216	151434215	+	0	NA	promoter-TSS (NM_001304527)	promoter-TSS (NM_001304527)	-315	NM_001304527	51422	Hs.647072	NM_016203	ENSG00000106617	PRKAG2	AAKG|AAKG2|CMH6|H91620p|WPWS	protein kinase AMP-activated non-catalytic subunit gamma 2	protein-coding
813	chr11	117080065	117081064	+	0	NA	intron (NM_004716, intron 12 of 16)	AluJb|SINE|Alu	-7934	NR_045215	100652768	Hs.732365	NR_045215		LOC100652768	-	uncharacterized LOC100652768	ncRNA	LOC100652768	-	-	LOC100652768	LOC100652768	TSS10382	chr11:117049938-117075508	-	-	2.85151	0	10.6758	OK	1.97634	0	9.10524	OK	2.19695	0	7.77131	OK	1.11758	0	5.5763	OK	3.89697	0	19.1726	OK	2.15894	0
2014	chr3	142681834	142682833	+	0	NA	promoter-TSS (NM_198504)	promoter-TSS (NM_198504)	-155	NM_198504	344838	Hs.408385	NM_198504	ENSG00000188582	PAQR9	-	progestin and adipoQ receptor family member 9	protein-coding	PAQR9	-	-	PAQR9	PAQR9	TSS3215	chr3:142680073-142682178	-	-	0.106385	0	0.245983	OK	0	0	0	OK	0.0119664	0	0.0767917	OK	0	0	0	OK	0.0357092	0	0.126651	OK	0	0
644	chr5	139298552	139299551	+	0	NA	intron (NM_013983, intron 1 of 10)	intron (NM_013983, intron 1 of 10)	123645	NM_032289	84249	Hs.21963	NM_032289	ENSG00000146005	PSD2	EFA6C	pleckstrin and Sec7 domain containing 2	protein-coding	PSD2	-	-	PSD2	PSD2	TSS28539	chr5:139175405-139224048	-	-	0.0338458	0	0.0900418	OK	0.0989263	0.0158751	0.181977	OK	0.00961625	0	0.0381259	OK	0.0773236	0.00606855	0.148579	OK	0.0568647	0	0.123172	OK	0.208056	0.08299
6810	chrX	128788154	128789153	+	0	NA	5' UTR (NM_017413, exon 1 of 3)	5' UTR (NM_017413, exon 1 of 3)	280	NM_017413	8862	Hs.303084	NM_017413	ENSG00000171388	APLN	APEL|XNPEP2	apelin	protein-coding	APLN	-	-	APLN	APLN	TSS6932	chrX:128779235-128788933	-	-	2.12202	1.4705	2.77353	OK	1.24684	0.796676	1.69701	OK	1.0762	0.671375	1.48102	OK	0.796217	0.459446	1.13299	OK	0.744663	0.417097	1.07223	OK	0.10756	0
6641	chr20	62460929	62462409	+	0	NA	Intergenic	CpG	22240	NR_110081	101928604	Hs.676054	NR_110081		ZBTB46-AS1	-	ZBTB46 antisense RNA 1	ncRNA	ZBTB46-AS1	-	-	ZBTB46-AS1	ZBTB46-AS1	TSS16637	chr20:62439428-62454360	-	-	0	0	0	OK	0	0	0	OK	0	0	0	OK	0.0210553	0	0.14551	OK	0.0233732	0	0.148184	OK	0	0
2477	chrX	53471866	53472865	+	0	NA	Intergenic	MER67B|LTR|ERV1	-11042	NM_004493	3028	Hs.171280	NM_004493	ENSG00000072506	HSD17B10	17b-HSD10|ABAD|CAMR|DUPXp11.22|ERAB|HADH2|HCD2|MHBD|MRPP2|MRX17|MRX31|MRXS10|SCHAD|SDR5C1	hydroxysteroid 17-beta dehydrogenase 10	protein-coding	HSD17B10	-	-	HSD17B10	HSD17B10	TSS4227	chrX:53458205-53461323	-	-	69.928	56.6557	83.2002	OK	61.3272	49.5821	73.0724	OK	69.0934	56.2329	81.954	OK	74.2652	60.4996	88.0307	OK	71.6781	58.3141	85.0422	OK	70.4534	57.2108
5140	chr1	86372719	86373718	+	0	NA	intron (NM_152890, intron 27 of 59)	intron (NM_152890, intron 27 of 59)	-199102	NM_017953	54680	Hs.5111	NM_017953	ENSG00000117174	ZNHIT6	BCD1|C1orf181|NY-BR-75	zinc finger HIT-type containing 6	protein-coding	ZNHIT6	-	-	ZNHIT6	ZNHIT6	TSS13204	chr1:86115105-86174116	-	-	9.01459	7.34529	10.6839	OK	5.95555	4.7696	7.14149	OK	9.9912	8.14192	11.8405	OK	6.66058	5.36076	7.9604	OK	6.00774	4.82094	7.19455	OK	3.72591	2.92448
3360	chr12	64609091	64610090	+	0	NA	exon (NM_152440, exon 2 of 3)	exon (NM_152440, exon 2 of 3)	6486	NM_001300940	144577	Hs.444671	NM_152440	ENSG00000174206	C12orf66	-	chromosome 12 open reading frame 66	protein-coding
1820	chr2	158046249	158047248	+	0	NA	Intergenic	Intergenic	-67362	NM_014568	11227	Hs.269027	NM_014568	ENSG00000136542	GALNT5	GALNAC-T5|GALNACT5	polypeptide N-acetylgalactosaminyltransferase 5	protein-coding	GALNT5	-	-	GALNT5	GALNT5	TSS25775	chr2:158114339-158167913	-	-	14.638	11.8318	17.4441	OK	13.6538	11.0056	16.302	OK	13.72	11.0525	16.3875	OK	11.5341	9.24115	13.8271	OK	10.0702	8.01932	12.121	OK	12.9289	10.4083
5308	chr16	69882721	69883720	+	0	NA	intron (NM_007014, intron 7 of 24)	intron (NM_007014, intron 7 of 24)	10580	NM_001270453	11060	Hs.408458	NM_007014	ENSG00000198373	WWP2	AIP2|WWp2-like	WW domain containing E3 ubiquitin protein ligase 2	protein-coding
5182	chr7	126891330	126892329	+	0	NA	intron (NM_001127323, intron 1 of 10)	CpG	599	NM_001127323	2918	Hs.449625	NM_000845	ENSG00000179603	GRM8	GLUR8|GPRC1H|MGLUR8|mGlu8	glutamate metabotropic receptor 8	protein-coding
2110	chr16	87622098	87623097	+	0	NA	Intergenic	Intergenic	-12844	NR_073379	57338	Hs.592068	NM_020655	ENSG00000154118	JPH3	CAGL237|HDL2|JP-3|JP3|TNRC22	junctophilin 3	protein-coding
5275	chr1	10397258	10398257	+	0	NA	intron (NM_015074, intron 29 of 46)	intron (NM_015074, intron 29 of 46)	38733	NR_125730	103625684		NR_125730	ENSG00000207357	RNU6-2	U6-2	RNA, U6 small nuclear 2	snRNA	RNU6-2	-	-	RNU6-2	RNU6-2	TSS12865,TSS13195,TSS14363,TSS15010,TSS17832,TSS18156,TSS18755,TSS23705,TSS31101,TSS6955,TSS8733	chr1:10270763-10441661	-	-	0	0	0	OK	0	0	0	OK	0	0	0	OK	0	0	0	OK	0	0	0	OK	0	0
1342	chr10	74775995	74776994	+	0	NA	intron (NM_001142596, intron 10 of 13)	AluSx|SINE|Alu	-61917	NM_032562	84647	Hs.333175	NM_032562	ENSG00000138308	PLA2G12B	FKSG71|GXIIB|GXIIIsPLA2|PLA2G13|sPLA2-GXIIB	phospholipase A2 group XIIB	protein-coding	PLA2G12B	-	-	PLA2G12B	PLA2G12B	TSS26802	chr10:74694937-74714510	-	-	0	0	0	OK	0.0229484	0	0.148302	OK	0	0	0	OK	0	0	0	OK	0	0	0	OK	0	0
4359	chr9	129987070	129988069	+	0	NA	Intergenic	CpG	-38372	NM_001286779	84253	Hs.29304	NM_032293	ENSG00000136895	GARNL3	bA356B19.1	GTPase activating Rap/RanGAP domain like 3	protein-coding
4185	chr15	69706716	69707715	+	0	NA	non-coding (NR_132969, exon 1 of 2)	non-coding (NR_132969, exon 1 of 2)	153	NR_132969	145694	Hs.147229	NR_132969	ENSG00000259426	LOC145694	-	uncharacterized LOC145694	ncRNA
2457	chr3	186945257	186946256	+	0	NA	intron (NM_001879, intron 11 of 15)	intron (NM_001879, intron 11 of 15)	-20339	NR_110052	101929106	Hs.640145	NR_110052	ENSG00000198491	LOC101929106	-	uncharacterized LOC101929106	ncRNA	LOC101929106	-	-	LOC101929106	LOC101929106	TSS28665	chr3:186914877-186925417	-	-	0.0519024	0	0.143091	OK	0	0	0	OK	0	0	0	OK	0	0	0	OK	0	0	0	OK	0	0
1968	chr2	198507039	198508038	+	0	NA	intron (NM_144629, intron 3 of 8)	AluJo|SINE|Alu	33046	NM_144629	130132	Hs.591615	NM_144629	ENSG00000162944	RFTN2	C2orf11|Raftlin-2	raftlin family member 2	protein-coding	RFTN2	-	-	RFTN2	RFTN2	TSS9789	chr2:198435526-198540584	-	-	0.314879	0.133468	0.496289	OK	0.700469	0.399429	1.00151	OK	0.11085	0	0.224267	OK	0.441246	0.214568	0.667925	OK	0.177971	0.0447029	0.311239	OK	0.719995	0.421579
1802	chr8	144714653	144715652	+	0	NA	Intergenic	Intergenic	-3031	NM_001261843	9831	Hs.43133	NM_014789	ENSG00000183309	ZNF623	-	zinc finger protein 623	protein-coding
2775	chr3	49501980	49502979	+	0	NA	Intergenic	AluSx1|SINE|Alu	-3657	NM_001177643	1605	Hs.76111	NM_004393	ENSG00000173402	DAG1	156DAG|A3a|AGRNR|DAG|MDDGA9|MDDGC7|MDDGC9	dystroglycan 1	protein-coding
4065	chr3	166068438	166069437	+	0	NA	Intergenic	HERVL-int|LTR|ERVL	-513677	NR_137635	590	Hs.420483	NM_000055	ENSG00000114200	BCHE	CHE1|CHE2|E1	butyrylcholinesterase	protein-coding
4009	chr5	150731885	150732884	+	0	NA	Intergenic	MLT1D|LTR|ERVL-MaLR	-5233	NM_181776	153201	Hs.483877	NM_181776	ENSG00000186335	SLC36A2	PAT2|TRAMD1	solute carrier family 36 member 2	protein-coding	SLC36A2	-	-	SLC36A2	SLC36A2	TSS15603	chr5:150694538-150727151	-	-	0	0	0	OK	0	0	0	OK	0	0	0	OK	0.00563853	0	0.0429706	OK	0	0	0	OK	0	0
5660	chr10	93320992	93321991	+	0	NA	intron (NR_024467, intron 1 of 4)	THE1C-int|LTR|ERVL-MaLR	49726	NR_024467	100188947	Hs.535293	NR_024467		HECTD2-AS1	-	HECTD2 antisense RNA 1	ncRNA	HECTD2-AS1	-	-	HECTD2-AS1	HECTD2-AS1	TSS21824	chr10:93066718-93371217	-	-	0	0	0	OK	0.045686	0	0.283021	OK	0	0	0	OK	0.0845342	0	0.384787	OK	0.181587	0	0.745776	OK	0.301686	0
2273	chr14	90490892	90491891	+	0	NA	intron (NM_001330205, intron 14 of 14)	intron (NM_001330205, intron 14 of 14)	-36718	NM_022054	56659	Hs.510191	NM_022054	ENSG00000152315	KCNK13	K2p13.1|THIK-1|THIK1	potassium two pore domain channel subfamily K member 13	protein-coding	KCNK13	-	-	KCNK13	KCNK13	TSS2656	chr14:90528108-90652201	-	-	0	0	0	OK	0	0	0	OK	0	0	0	OK	0	0	0	OK	0	0	0	OK	0.0123095	0
3476	chr11	120139915	120140914	+	0	NA	intron (NM_014352, intron 3 of 12)	intron (NM_014352, intron 3 of 12)	-3773	NR_038829	649133	Hs.568902	NR_038829	ENSG00000259541	LOC649133	-	uncharacterized LOC649133	ncRNA	LOC649133	-	-	LOC649133	LOC649133	TSS17938	chr11:120107348-120190653	-	-	0	0	0	OK	0	0	0	OK	0	0	0	OK	0.0183221	0	0.101457	OK	0	0	0	OK	0	0
791	chrX	129066214	129067213	+	0	NA	Intergenic	CpG	26616	NM_006649	10813	Hs.458598	NM_006649	ENSG00000156697	UTP14A	NYCO16|SDCCAG16|dJ537K23.3	UTP14A small subunit processome component	protein-coding	UTP14A	-	-	UTP14A	UTP14A	TSS23197	chrX:129040096-129063738	-	-	18.0027	14.5166	21.4888	OK	10.556	8.3112	12.8007	OK	16.3505	13.1303	19.5707	OK	12.8751	10.2469	15.5032	OK	16.4644	13.2257	19.703	OK	11.7794	9.33623
3330	chr5	44392535	44393534	+	0	NA	intron (NR_108034, intron 1 of 2)	intron (NR_108034, intron 1 of 2)	4200	NR_108034	101927075	Hs.617390	NR_108034	ENSG00000248464	FGF10-AS1	-	FGF10 antisense RNA 1	ncRNA	FGF10-AS1	-	-	FGF10-AS1	FGF10-AS1	TSS12676	chr5:44388833-44414091	-	-	0	0	0	OK	0	0	0	OK	0	0	0	OK	0	0	0	OK	0	0	0	OK	0.0120912	0
1355	chr11	68670870	68671869	+	0	NA	promoter-TSS (NM_181514)	promoter-TSS (NM_181514)	50	NM_002180	3508	Hs.503048	NM_002180	ENSG00000132740	IGHMBP2	CATF1|CMT2S|HCSA|HMN6|SMARD1|SMUBP2|ZFAND7	immunoglobulin mu binding protein 2	protein-coding	IGHMBP2	-	-	IGHMBP2	IGHMBP2	TSS20593	chr11:68671318-68708069	-	-	8.07825	6.37371	9.78278	OK	6.14754	4.79528	7.4998	OK	7.07476	5.58303	8.5665	OK	5.95731	4.64214	7.27247	OK	9.46517	7.54327	11.3871	OK	8.57514	6.80213
3640	chr5	136537234	136538233	+	0	NA	intron (NM_004598, intron 3 of 10)	intron (NM_004598, intron 3 of 10)	73847	NR_134246	105379192	Hs.124611	NR_134246		LOC105379192	-	uncharacterized LOC105379192	ncRNA
2231	chr5	121464771	121465770	+	0	NA	promoter-TSS (NM_207317)	promoter-TSS (NM_207317)	62	NM_207317	133923	Hs.729673	NM_207317	ENSG00000164185	ZNF474	-	zinc finger protein 474	protein-coding	ZNF474	-	-	ZNF474	ZNF474	TSS5276	chr5:121465207-121489266	-	-	0.180619	0.0146689	0.346569	OK	0.0771596	0	0.20523	OK	0.0224454	0	0.0890644	OK	0.0634228	0	0.157391	OK	0.306542	0.0832517	0.529832	OK	0.505573	0.213473
5904	chr13	98114172	98115171	+	0	NA	intron (NM_021033, intron 1 of 1)	intron (NM_021033, intron 1 of 1)	28196	NM_021033	5911	Hs.508480	NM_021033	ENSG00000125249	RAP2A	K-REV|KREV|RAP2|RbBP-30	RAP2A, member of RAS oncogene family	protein-coding	RAP2A	-	-	RAP2A	RAP2A	TSS29531	chr13:98086474-98120252	-	-	2.36412	1.76108	2.96717	OK	2.09492	1.53013	2.65971	OK	1.81457	1.28931	2.33983	OK	2.49945	1.85576	3.14314	OK	1.61231	1.1517	2.07292	OK	1.81302	1.31218
3617	chr12	30948038	30949037	+	0	NA	promoter-TSS (NR_040245)	promoter-TSS (NR_040245)	-78	NR_040245	100287314	Hs.355210	NR_040245	ENSG00000235884	LINC00941	-	long intergenic non-protein coding RNA 941	ncRNA	LINC00941	-	-	LINC00941	LINC00941	TSS2045	chr12:30948614-30955645	-	-	9.08432	6.95315	11.2155	OK	4.76354	3.45436	6.07272	OK	9.11191	6.97989	11.2439	OK	6.63724	4.97306	8.30143	OK	7.37146	5.56606	9.17686	OK	3.87051	2.74501
3231	chr10	90516564	90517563	+	0	NA	Intergenic	Intergenic	-4100	NM_001102469	643418	Hs.632091	NM_001102469	ENSG00000204020	LIPN	ARCI8|LI4|LIPL4|bA186O14.3	lipase family member N	protein-coding	LIPN	-	-	LIPN	LIPN	TSS1111	chr10:90521162-90537999	-	-	0	0	0	OK	0	0	0	OK	0	0	0	OK	0	0	0	OK	0	0	0	OK	0	0
3095	chr1	234745470	234747259	+	0	NA	Intergenic	CpG	-1093	NM_001077397	359948	Hs.350268	NM_182972	ENSG00000168264	IRF2BP2	-	interferon regulatory factor 2 binding protein 2	protein-coding
916	chr2	62932169	62933168	+	0	NA	promoter-TSS (NM_015252)	promoter-TSS (NM_015252)	-333	NM_015252	23301	Hs.271667	NM_015252	ENSG00000115504	EHBP1	HPC12|NACSIN	EH domain binding protein 1	protein-coding	EHBP1	-	-	EHBP1	EHBP1	TSS12204,TSS20493,TSS21041	chr2:62900985-63275656	-	-	11.4649	9.34054	13.5893	OK	9.82077	7.9498	11.6917	OK	11.9206	9.69339	14.1478	OK	10.6368	8.63473	12.6389	OK	10.1383	8.21398	12.0627	OK	8.29933	6.66335
2043	chr11	518252	519251	+	0	NA	Intergenic	CpG	-11468	NM_203387	6050	Hs.530687	NM_002939	ENSG00000023191	RNH1	RAI|RNH	ribonuclease/angiogenin inhibitor 1	protein-coding
3646	chr7	29138874	29139873	+	0	NA	intron (NM_019029, intron 3 of 12)	intron (NM_019029, intron 3 of 12)	-25276	NR_120523	101928168	Hs.666750	NR_120523	ENSG00000106069	LOC101928168	-	uncharacterized LOC101928168	ncRNA	LOC101928168	-	-	LOC101928168	LOC101928168	TSS18830	chr7:29019582-29186153	-	-	0	0	0	OK	0	0	0	OK	0	0	0	OK	0	0	0	OK	0	0	0	OK	0	0
4857	chr11	65266029	65267028	+	0	NA	non-coding (NR_002819, exon 1 of 1)	non-coding (NR_002819, exon 1 of 1)	1319	NR_002819	378938	Hs.621695	NR_002819		MALAT1	HCN|LINC00047|NCRNA00047|NEAT2|PRO2853	metastasis associated lung adenocarcinoma transcript 1 (non-protein coding)	ncRNA	MALAT1	-	-	MALAT1	MALAT1	TSS4337	chr11:65265232-65273983	-	-	301.711	252.792	350.63	OK	412.613	344.525	480.701	OK	431.588	360.843	502.332	OK	284.389	237.83	330.948	OK	270.09	226.771	313.409	OK	358.598	300.163
4828	chr11	96450335	96451334	+	0	NA	Intergenic	Intergenic	209245	NR_135097	105369443	Hs.599377	NR_135097	ENSG00000256684	LOC105369443	-	uncharacterized LOC105369443	ncRNA
329	chr7	18457257	18458256	+	0	NA	intron (NM_001321896, intron 1 of 12)	L1MEc|LINE|L1	-77577	NM_001321894	9734	Hs.196054	NM_014707	ENSG00000048052	HDAC9	HD7|HD7b|HD9|HDAC|HDAC7|HDAC7B|HDAC9B|HDAC9FL|HDRP|MITR	histone deacetylase 9	protein-coding
525	chr7	93685708	93686707	+	0	NA	Intergenic	MER58A|DNA|hAT-Charlie	-52513	NM_005868	10282	Hs.489132	NM_005868	ENSG00000105829	BET1	HBET1	Bet1 golgi vesicular membrane trafficking protein	protein-coding	BET1	-	-	BET1	BET1	TSS33810	chr7:93620999-93633690	-	-	14.1189	11.3864	16.8513	OK	20.8241	16.9572	24.6909	OK	20.3302	16.4955	24.1648	OK	24.793	20.2947	29.2913	OK	15.0166	12.1219	17.9113	OK	18.903	15.3662
4476	chr5	154061634	154062633	+	0	NA	Intergenic	Intergenic	-3203	NR_031638	100302284		NR_031638	ENSG00000221552	MIR1303	MIRN1303|hsa-mir-1303	microRNA 1303	ncRNA	MIR1303	-	-	MIR1303	MIR1303	TSS30323	chr5:154065335-154065421	-	-	0	0	0	OK	0	0	0	OK	0	0	0	OK	0	0	0	OK	0	0	0	OK	0	0
27	chr3	141806995	141807994	+	0	NA	intron (NM_001178138, intron 3 of 13)	FRAM|SINE|Alu	-59987	NM_006286	7029	Hs.379018	NM_006286	ENSG00000114126	TFDP2	DP2	transcription factor Dp-2	protein-coding	TFDP2	-	-	TFDP2	TFDP2	TSS12565,TSS13865,TSS3714	chr3:141663269-141868386	-	-	2.39515	1.88091	2.90938	OK	3.82781	3.0634	4.59222	OK	2.15878	1.68856	2.629	OK	4.26722	3.44504	5.0894	OK	3.69041	2.95641	4.42441	OK	4.21214	3.39777
787	chr1	54518727	54519726	+	0	NA	promoter-TSS (NR_039942)	promoter-TSS (NR_039942)	-19	NR_130900	127428	Hs.558618	NM_153035	ENSG00000116205	TCEANC2	C1orf83	transcription elongation factor A N-terminal and central domain containing 2	protein-coding
2331	chr9	137494147	137495146	+	0	NA	Intergenic	Intergenic	-39005	NM_001278074	1289	Hs.210283	NM_000093	ENSG00000130635	COL5A1	EDSC	collagen type V alpha 1 chain	protein-coding
1902	chr19	13858341	13859340	+	0	NA	intron (NM_001320569, intron 1 of 8)	CpG	163	NM_030818	81576	Hs.24998	NM_030818	ENSG00000104957	CCDC130	-	coiled-coil domain containing 130	protein-coding	CCDC130	-	-	CCDC130	CCDC130	TSS2197	chr19:13858752-13874106	-	-	11.7101	8.8439	14.5762	OK	16.8066	13.0776	20.5355	OK	13.9824	10.8173	17.1475	OK	19.489	15.3177	23.6604	OK	14.4313	11.1117	17.7508	OK	20.1657	15.8308
1561	chr15	93425877	93426876	+	0	NA	promoter-TSS (NR_037602)	promoter-TSS (NR_037602)	-150	NR_037602	100507217	Hs.622504	NR_037600		LINC01578	-	long intergenic non-protein coding RNA 1578	ncRNA
3909	chr18	33877567	33878566	+	0	NA	intron (NM_025135, intron 1 of 24)	CpG	407	NM_001281739	80206	Hs.436636	NM_025135	ENSG00000134775	FHOD3	FHOS2|Formactin2	formin homology 2 domain containing 3	protein-coding
5255	chr10	123633767	123634766	+	0	NA	intron (NR_110006, intron 5 of 9)	AluY|SINE|Alu	53312	NM_007041	11101	Hs.632080	NM_007041	ENSG00000107669	ATE1	-	arginyltransferase 1	protein-coding	ATE1	-	-	ATE1	ATE1	TSS19804,TSS24093	chr10:123499935-123711480	-	-	12.5486	10.2125	14.8847	OK	9.7167	7.84036	11.593	OK	14.8401	12.1012	17.5789	OK	10.4378	8.43503	12.4406	OK	10.9562	8.89708	13.0153	OK	9.42337	7.60162
5216	chr7	43247616	43248615	+	0	NA	intron (NM_015052, intron 2 of 29)	intron (NM_015052, intron 2 of 29)	57621	NR_037508	100500829		NR_037508	ENSG00000264069	MIR3943	-	microRNA 3943	ncRNA	MIR3943	-	-	MIR3943	MIR3943	TSS9485	chr7:43152197-43602938	-	-	0	0	0	OK	0	0	0	OK	0	0	0	OK	0	0	0	OK	0	0	0	OK	0	0
1866	chr10	33246857	33247856	+	0	NA	promoter-TSS (NM_133376)	promoter-TSS (NM_133376)	-63	NM_002211	3688	Hs.643813	NM_002211	ENSG00000150093	ITGB1	CD29|FNRB|GPIIA|MDF2|MSK12|VLA-BETA|VLAB	integrin subunit beta 1	protein-coding	ITGB1	-	-	ITGB1	ITGB1	TSS11504,TSS11656,TSS28511	chr10:33189245-33247293	-	-	634.601	533.47	735.731	OK	582.164	489.893	674.434	OK	828.246	695.98	960.511	OK	561.342	473.383	649.301	OK	541.119	454.358	627.88	OK	607.034	510.123
6316	chr14	89850191	89851190	+	0	NA	intron (NM_001085471, intron 2 of 6)	MIR3|SINE|MIR	32764	NM_005197	1112	Hs.434286	NM_005197	ENSG00000053254	FOXN3	C14orf116|CHES1|PRO1635	forkhead box N3	protein-coding	FOXN3	-	-	FOXN3	FOXN3	TSS17943,TSS27728	chr14:89622515-90085494	-	-	2.49772	1.91902	3.07643	OK	2.81988	2.19487	3.44489	OK	1.54474	1.15474	1.93474	OK	2.332	1.7986	2.8654	OK	4.64959	3.7107	5.58849	OK	3.65399	2.89542
2001	chr12	29936177	29937176	+	0	NA	promoter-TSS (NM_001193451)	promoter-TSS (NM_001193451)	67	NM_001193451	83857	Hs.401954	NM_175861	ENSG00000133687	TMTC1	ARG99|OLF|TMTC1A	transmembrane and tetratricopeptide repeat containing 1	protein-coding
4394	chr10	14572195	14573194	+	0	NA	intron (NM_031453, intron 2 of 4)	intron (NM_031453, intron 2 of 4)	2015	NM_001320741	83641	Hs.446315	NM_031453	ENSG00000065809	FAM107B	C10orf45|HITS	family with sequence similarity 107 member B	protein-coding
3736	chr17	48103087	48104086	+	0	NA	Intergenic	Intergenic	29517	NR_038230	284080	Hs.274864	NR_038230	ENSG00000246640	LOC284080	-	uncharacterized LOC284080	ncRNA	LOC284080	-	-	LOC284080	LOC284080	TSS20484	chr17:48127712-48133103	-	-	0.0163479	0	0.0672811	OK	0.0810198	0	0.190765	OK	0.0985748	0	0.208862	OK	0.0853837	0	0.186	OK	0.0811358	0	0.181725	OK	0.128113	0.0049236
3731	chr5	162925521	162926520	+	0	NA	Intergenic	L2|LINE|L2	-4050	NM_182796	27430	Hs.54642	NM_013283	ENSG00000038274	MAT2B	MAT-II|MATIIbeta|Nbla02999|SDR23E1|TGR	methionine adenosyltransferase 2B	protein-coding
3216	chr7	5562438	5563437	+	0	NA	intron (NR_126168, intron 3 of 3)	intron (NR_126168, intron 3 of 3)	7295	NM_001101	60	Hs.520640	NM_001101	ENSG00000075624	ACTB	BRWS1|PS1TP5BP1	actin beta	protein-coding	ACTB	-	-	ACTB	ACTB	TSS34091	chr7:5566778-5570232	-	-	7818.85	6424.58	9213.13	OK	7089.58	5857.24	8321.93	OK	6004.92	4987.43	7022.4	OK	5586.41	4641.29	6531.53	OK	11971.8	9539.59	14404	OK	6944.76	5750.95
1310	chr1	52455877	52456876	+	0	NA	promoter-TSS (NM_002867)	promoter-TSS (NM_002867)	60	NM_002867	5865	Hs.123072	NM_002867	ENSG00000169213	RAB3B	-	RAB3B, member RAS oncogene family	protein-coding	RAB3B	-	-	RAB3B	RAB3B	TSS28871	chr1:52373627-52456436	-	-	11.4574	9.52724	13.3875	OK	7.37335	6.08517	8.66152	OK	14.4964	12.083	16.9099	OK	5.80777	4.76759	6.84794	OK	14.6153	12.1823	17.0484	OK	8.81171	7.29576
5901	chr5	15552023	15553022	+	0	NA	intron (NM_001278317, intron 1 of 3)	L2b|LINE|L2	50975	NM_001278317	23194	Hs.433057	NM_012304	ENSG00000183580	FBXL7	FBL6|FBL7	F-box and leucine rich repeat protein 7	protein-coding
3459	chr15	92992527	92993526	+	0	NA	intron (NM_001330416, intron 4 of 4)	L1PA16|LINE|L1	21750	NR_126501	104613533	Hs.97584	NR_126501	ENSG00000259170	LOC104613533	-	uncharacterized LOC104613533	ncRNA	LOC104613533	-	-	LOC104613533	LOC104613533	TSS19735	chr15:93013463-93014776	-	-	0	0	0	OK	0	0	0	OK	0	0	0	OK	0	0	0	OK	0	0	0	OK	0	0
2115	chr6	124713616	124714615	+	0	NA	intron (NM_153355, intron 3 of 5)	AluJo|SINE|Alu	109964	NM_001300740	154215	Hs.656604	NM_153355	ENSG00000188580	NKAIN2	FAM77B|NKAIP2|TCBA|TCBA1	Sodium/potassium transporting ATPase interacting 2	protein-coding
6512	chr16	475431	476430	+	0	NA	5' UTR (NM_014700, exon 1 of 14)	5' UTR (NM_014700, exon 1 of 14)	262	NM_014700	9727	Hs.531642	NM_014700	ENSG00000090565	RAB11FIP3	CART1|Rab11-FIP3	RAB11 family interacting protein 3	protein-coding	RAB11FIP3	-	-	RAB11FIP3	RAB11FIP3	TSS23278,TSS4732	chr16:475667-572481	-	-	3.33011	2.41855	4.24166	OK	2.16378	1.53199	2.79556	OK	1.83515	1.27081	2.39949	OK	1.92556	1.33673	2.51439	OK	2.25873	1.59385	2.92361	OK	3.30819	2.42925
4703	chr2	121486704	121487703	+	0	NA	Intergenic	Intergenic	-67664	NM_005270	2736	Hs.111867	NM_005270	ENSG00000074047	GLI2	CJS|HPE9|PHS2|THP1|THP2	GLI family zinc finger 2	protein-coding	GLI2	-	-	GLI2	GLI2	TSS20722	chr2:121554866-121750229	-	-	0.582265	0.375405	0.789126	OK	0.430946	0.265853	0.596039	OK	0.296444	0.165517	0.427371	OK	0.252297	0.133352	0.371241	OK	0.447353	0.27495	0.619755	OK	0.320255	0.18146
4357	chr12	57229839	57230838	+	0	NA	Intergenic	MER50-int|LTR|ERV1	73336	NM_003725	8630	Hs.524513	NM_003725	ENSG00000025423	HSD17B6	HSE|RODH|SDR9C6	hydroxysteroid 17-beta dehydrogenase 6	protein-coding	HSD17B6	-	-	HSD17B6	HSD17B6	TSS13263	chr12:57157001-57181574	-	-	0.564325	0.231199	0.897451	OK	0.208299	0.00990235	0.406695	OK	0.326151	0.0741664	0.578135	OK	0.477545	0.169321	0.785768	OK	1.88166	1.18025	2.58308	OK	0.445434	0.149633
5796	chr1	6301827	6302826	+	0	NA	Intergenic	CpG	-1926	NM_001024598	390992	Hs.532677	NM_001024598	ENSG00000173673	HES3	bHLHb43	hes family bHLH transcription factor 3	protein-coding	HES3	-	-	HES3	HES3	TSS27571	chr1:6304251-6305638	-	-	0	0	0	OK	0	0	0	OK	0	0	0	OK	0	0	0	OK	0	0	0	OK	0	0
6670	chr3	127347629	127348628	+	0	NA	exon (NM_015720, exon 1 of 8)	exon (NM_015720, exon 1 of 8)	126	NM_015720	50512	Hs.591290	NM_015720	ENSG00000114631	PODXL2	EG|PODLX2	podocalyxin like 2	protein-coding	PODXL2	-	-	PODXL2	PODXL2	TSS14008	chr3:127348001-127391653	-	-	0	0	0	OK	0	0	0	OK	0	0	0	OK	0.0106278	0	0.0722386	OK	0.0457501	0	0.149238	OK	0.110545	0
4578	chr7	142494729	142495728	+	0	NA	Intergenic	CpG	16471	NR_001296	154754	Hs.449281	NR_001296		PRSS3P2	T6|TRY6	protease, serine 3 pseudogene 2	pseudo	PRSS3P2	-	-	PRSS3P2	PRSS3P2	TSS11235	chr7:142478756-142482399	-	-	0	0	0	OK	0	0	0	OK	0	0	0	OK	0	0	0	OK	0	0	0	OK	0	0
4234	chr8	142664792	142665791	+	0	NA	Intergenic	L1MDa|LINE|L1	-147961	NR_102364	389690	Hs.689547	NM_207414	ENSG00000226807	MROH5	-	maestro heat like repeat family member 5	protein-coding
3695	chr20	34823744	34824743	+	0	NA	promoter-TSS (NM_015511)	promoter-TSS (NM_015511)	-96	NM_015511	25980	Hs.11314	NM_015511	ENSG00000131043	AAR2	C20orf4|CGI-23	AAR2 splicing factor homolog	protein-coding	AAR2	-	-	AAR2	AAR2	TSS16351	chr20:34824338-34844863	-	-	46.5894	38.5089	54.6699	OK	34.9014	28.6686	41.1342	OK	47.0044	38.8957	55.1131	OK	39.541	32.632	46.45	OK	48.3777	40.0071	56.7482	OK	44.3831	36.6837
1239	chr3	125093844	125094843	+	0	NA	promoter-TSS (NM_021964)	promoter-TSS (NM_021964)	-145	NM_021964	7707	Hs.592591	NM_021964	ENSG00000163848	ZNF148	BERF-1|BFCOL1|HT-BETA|ZBP-89|ZFP148|pHZ-52	zinc finger protein 148	protein-coding	ZNF148	-	-	ZNF148	ZNF148	TSS7664	chr3:124944512-125094198	-	-	7.32793	6.02045	8.63541	OK	7.80334	6.40249	9.20419	OK	8.1488	6.67375	9.62385	OK	7.62717	6.2527	9.00164	OK	7.12919	5.83769	8.42069	OK	7.66319	6.29006
4489	chr6	48390077	48391076	+	0	NA	Intergenic	MER52C|LTR|ERV1	-354151	NM_207499	442213	Hs.659409	NM_207499	ENSG00000244694	PTCHD4	C6orf138|PTCH53|dJ402H5.2	patched domain containing 4	protein-coding	PTCHD4	-	-	PTCHD4	PTCHD4	TSS10010	chr6:47845763-48036425	-	-	0.0333468	0	0.118932	OK	0	0	0	OK	0.00704558	0	0.0685656	OK	0	0	0	OK	0	0	0	OK	0	0
6306	chr8	12622178	12623177	+	0	NA	TTS (NR_015383)	TTS (NR_015383)	-9726	NR_138256	91694	Hs.180178	NM_152271	ENSG00000154359	LONRF1	RNF191	LON peptidase N-terminal domain and ring finger 1	protein-coding
3035	chr12	96042825	96043824	+	0	NA	intron (NR_077225, intron 1 of 4)	intron (NR_077225, intron 1 of 4)	293	NR_077225	100132594	Hs.676211	NR_077225	ENSG00000257150	PGAM1P5	-	phosphoglycerate mutase 1 pseudogene 5	pseudo	PGAM1P5	-	-	PGAM1P5	PGAM1P5	TSS16851	chr12:96043030-96184536	-	-	0.158098	0	1.18236	OK	0.158615	0	1.33276	OK	0.0414309	0	0.404224	OK	0.152637	0	0.768639	OK	0.131896	0	1.59702	OK	0.226904	0
769	chr5	179718433	179719432	+	0	NA	5' UTR (NM_139070, exon 1 of 12)	5' UTR (NM_139070, exon 1 of 12)	139	NM_139070	5601	Hs.484371	NM_002752	ENSG00000050748	MAPK9	JNK-55|JNK2|JNK2A|JNK2ALPHA|JNK2B|JNK2BETA|PRKM9|SAPK|SAPK1a|p54a|p54aSAPK	mitogen-activated protein kinase 9	protein-coding
1181	chr9	117287444	117288443	+	0	NA	Intergenic	Intergenic	-20207	NM_015404	25861	Hs.93836	NM_015404	ENSG00000095397	WHRN	CIP98|DFNB31|PDZD7B|USH2D|WI	whirlin	protein-coding
6009	chr17	30593443	30594442	+	0	NA	intron (NM_001330181, intron 1 of 7)	CpG	747	NM_138328	162494	Hs.655027	NM_138328	ENSG00000141314	RHBDL3	RHBDL4|VRHO	rhomboid like 3	protein-coding	RHBDL3	-	-	RHBDL3	RHBDL3	TSS15653	chr17:30593194-30651680	-	-	0.0320888	0	0.086417	OK	0.0358952	0	0.0838446	OK	0.00916563	0	0.0365971	OK	0.0266053	0	0.0659425	OK	0.0275096	0	0.076055	OK	0.0457956	0
5549	chr5	168649791	168650790	+	0	NA	intron (NM_003062, intron 3 of 35)	intron (NM_003062, intron 3 of 35)	40408	NR_030311	693170		NR_030311	ENSG00000207619	MIR585	MIRN585|hsa-mir-585|mir-585	microRNA 585	ncRNA	MIR585	-	-	MIR585	MIR585	TSS18372	chr5:168088737-168728133	-	-	0	0	0	OK	0	0	0	OK	0	0	0	OK	0	0	0	OK	0	0	0	OK	0	0
1809	chr1	19747558	19748557	+	0	NA	intron (NM_004930, intron 1 of 8)	intron (NM_004930, intron 1 of 8)	63144	NM_001282162	832	Hs.432760	NM_004930	ENSG00000077549	CAPZB	CAPB|CAPPB|CAPZ	capping actin protein of muscle Z-line beta subunit	protein-coding
803	chr1	151431464	151432463	+	0	NA	promoter-TSS (NM_001194937)	promoter-TSS (NM_001194937)	-22	NM_001194938	23126	Hs.489873	NM_015100	ENSG00000143442	POGZ	MRD37|WHSUS|ZNF280E|ZNF635|ZNF635m	pogo transposable element with ZNF domain	protein-coding
2744	chr7	134165218	134166217	+	0	NA	Intergenic	Intergenic	-21726	NM_001346142	231	Hs.521212	NM_001628	ENSG00000085662	AKR1B1	ADR|ALDR1|ALR2|AR	aldo-keto reductase family 1 member B	protein-coding
6027	chr11	70037582	70038581	+	0	NA	Intergenic	MIRc|SINE|MIR	-11188	NM_003824	8772	Hs.86131	NM_003824	ENSG00000168040	FADD	GIG3|MORT1	Fas associated via death domain	protein-coding	FADD	-	-	FADD	FADD	TSS29465	chr11:70049268-70053508	-	-	61.7599	50.793	72.7267	OK	63.3271	52.201	74.4532	OK	54.8494	45.1371	64.5616	OK	67.7992	55.9906	79.6077	OK	77.0953	63.7781	90.4125	OK	65.7087	54.1716
2559	chr3	43732003	43733002	+	0	NA	exon (NM_016006, exon 1 of 7)	exon (NM_016006, exon 1 of 7)	127	NM_016006	51099	Hs.19385	NM_016006	ENSG00000011198	ABHD5	CDS|CGI58|IECN2|NCIE2	abhydrolase domain containing 5	protein-coding	ABHD5	-	-	ABHD5	ABHD5	TSS2484	chr3:43732374-43764217	-	-	13.5227	11.0983	15.9472	OK	7.76382	6.24644	9.2812	OK	10.8893	8.84139	12.9372	OK	6.81155	5.45604	8.16706	OK	9.21227	7.47049	10.9541	OK	5.94631	4.74385
4796	chr7	84367306	84368305	+	0	NA	Intergenic	AluSc5|SINE|Alu	206013	NR_110079	101927378	Hs.539042	NR_110079	ENSG00000235139	LOC101927378	-	uncharacterized LOC101927378	ncRNA	LOC101927378	-	-	LOC101927378	LOC101927378	TSS8369	chr7:84161791-84213634	-	-	0	0	0	OK	0	0	0	OK	0	0	0	OK	0	0	0	OK	0	0	0	OK	0	0
4133	chr4	144506839	144507838	+	0	NA	intron (NM_001168235, intron 6 of 7)	intron (NM_001168235, intron 6 of 7)	26713	NR_003675	441046	Hs.135705	NM_001011539	ENSG00000236296	GUSBP5	GYPELOC441046	glucuronidase, beta pseudogene 5	pseudo
3199	chr7	99684471	99685470	+	0	NA	Intergenic	Intergenic	-1613	NM_006833	10980	Hs.15591	NM_006833	ENSG00000168090	COPS6	CSN6|MOV34-34KD	COP9 signalosome subunit 6	protein-coding	COPS6	-	-	COPS6	COPS6	TSS7572	chr7:99686582-99689822	-	-	165.769	138.218	193.321	OK	180.055	150.366	209.744	OK	151.732	126.561	176.904	OK	196.333	164.151	228.514	OK	204.707	171.219	238.196	OK	180.538	150.787
5801	chr12	92539013	92540012	+	0	NA	promoter-TSS (NR_135037)	promoter-TSS (NR_135037)	161	NM_001731	694	Hs.255935	NM_001731	ENSG00000133639	BTG1	APRO2	BTG anti-proliferation factor 1	protein-coding	BTG1	-	-	BTG1	BTG1	TSS29439	chr12:92378751-92539673	-	-	13.5697	11.0829	16.0565	OK	29.9872	24.8726	35.1019	OK	17.9403	14.694	21.1866	OK	32.7534	27.2056	38.3013	OK	28.4262	23.5311	33.3213	OK	39.4262	32.8374
4669	chr8	64692708	64693707	+	0	NA	non-coding (NR_038875, exon 2 of 3)	non-coding (NR_038875, exon 2 of 3)	11219	NR_038875	286184	Hs.586402	NR_038875	ENSG00000253734	LINC01289	-	long intergenic non-protein coding RNA 1289	ncRNA	LINC01289	-	-	LINC01289	LINC01289	TSS3354	chr8:64681987-64698054	-	-	0	0	0	OK	0	0	0	OK	0	0	0	OK	0	0	0	OK	0	0	0	OK	0.0157485	0
5890	chr18	2929136	2930135	+	0	NA	intron (NM_014646, intron 9 of 19)	AluSz|SINE|Alu	16986	NR_026659	727896	Hs.673126	NR_026659		LOC727896	-	cysteine and histidine rich domain containing 1 pseudogene	pseudo	LOC727896	-	-	LOC727896	LOC727896	TSS14863	chr18:2916991-3011945	-	-	1.715	0.571019	2.85899	OK	1.56203	0.358456	2.7656	OK	2.04018	0.751786	3.32858	OK	1.88697	0.637758	3.13618	OK	1.77957	0.500554	3.05858	OK	1.11231	0.13935
5287	chr8	23357882	23358881	+	0	NA	Intergenic	AluJb|SINE|Alu	-27927	NM_001317813	51312	Hs.596025	NM_016612	ENSG00000147454	SLC25A37	HT015|MFRN|MFRN1|MSC|MSCP|PRO1278|PRO1584|PRO2217	solute carrier family 25 member 37	protein-coding
60	chr8	26321279	26322278	+	0	NA	Intergenic	AluJr|SINE|Alu	49705	NM_007257	10687	Hs.591838	NM_007257	ENSG00000240694	PNMA2	MA2|MM2|RGAG2	paraneoplastic Ma antigen 2	protein-coding	PNMA2	-	-	PNMA2	PNMA2	TSS5210	chr8:26362195-26371483	-	-	25.8804	21.4326	30.3282	OK	21.7639	17.9771	25.5508	OK	33.1329	27.5386	38.7272	OK	23.2704	19.2422	27.2986	OK	18.2131	14.9893	21.4368	OK	12.5023	10.1959
1245	chr10	74318355	74319354	+	0	NA	intron (NM_006077, intron 3 of 11)	AluJo|SINE|Alu	-35110	NM_001195519	10367	Hs.524367	NM_006077	ENSG00000107745	MICU1	CALC|CBARA1|EFHA3|MPXPS	mitochondrial calcium uptake 1	protein-coding
1400	chr1	28844703	28845702	+	0	NA	intron (NM_001048195, intron 1 of 10)	CpG	457	NM_001048195	1104	Hs.469723	NM_001269	ENSG00000180198	RCC1	CHC1|RCC1-I|SNHG3-RCC1	regulator of chromosome condensation 1	protein-coding
1067	chr5	337578	338577	+	0	NA	intron (NM_020731, intron 1 of 11)	LTR41B|LTR|ERVL	33786	NM_001242412	57491	Hs.50823	NM_020731	ENSG00000063438	AHRR	AHH|AHHR|bHLHe77	aryl-hydrocarbon receptor repressor	protein-coding
691	chr1	23810071	23811070	+	0	NA	exon (NM_001143778, exon 1 of 24)	exon (NM_001143778, exon 1 of 24)	180	NM_017707	55616	Hs.437379	NM_017707	ENSG00000088280	ASAP3	ACAP4|CENTB6|DDEFL1|UPLC1	ArfGAP with SH3 domain, ankyrin repeat and PH domain 3	protein-coding	ASAP3	-	-	ASAP3	ASAP3	TSS21494	chr1:23755055-23810750	-	-	4.19365	3.20916	5.17814	OK	8.33758	6.6465	10.0287	OK	4.71203	3.65865	5.76541	OK	7.86575	6.24687	9.48462	OK	5.38549	4.19802	6.57296	OK	12.2851	9.93506
2615	chr3	32432940	32433939	+	0	NA	exon (NM_181472, exon 1 of 4)	exon (NM_181472, exon 1 of 4)	276	NM_181472	112616	Hs.440494	NM_138410	ENSG00000153551	CMTM7	CKLFSF7	CKLF like MARVEL transmembrane domain containing 7	protein-coding
5587	chr12	8091500	8092499	+	0	NA	Intergenic	AluSq2|SINE|Alu	-3107	NM_006931	6515	Hs.419240	NM_006931	ENSG00000059804	SLC2A3	GLUT3	solute carrier family 2 member 3	protein-coding	SLC2A3	-	-	SLC2A3	SLC2A3	TSS28651	chr12:8071823-8088892	-	-	11.6761	9.40573	13.9464	OK	22.9362	18.8389	27.0334	OK	12.187	9.811	14.5629	OK	18.6111	15.2085	22.0138	OK	12.6427	10.2144	15.071	OK	18.1623	14.8364
6301	chr6	116989480	116990479	+	0	NA	promoter-TSS (NM_145062)	promoter-TSS (NM_145062)	-6	NM_145062	221302	Hs.29857	NM_145062	ENSG00000153975	ZUFSP	C6orf113|dJ412I7.3	zinc finger with UFM1 specific peptidase domain	protein-coding	ZUFSP	-	-	ZUFSP	ZUFSP	TSS29669	chr6:116956780-116989973	-	-	9.7246	7.60881	11.8404	OK	8.38268	6.47395	10.2914	OK	10.0384	7.81597	12.2607	OK	9.98212	7.79914	12.1651	OK	9.83154	7.66727	11.9958	OK	5.83571	4.41007
6004	chr8	23680578	23681577	+	0	NA	Intergenic	AluJb|SINE|Alu	31243	NM_003155	6781	Hs.25590	NM_003155	ENSG00000159167	STC1	STC	stanniocalcin 1	protein-coding	STC1	-	-	STC1	STC1	TSS3535	chr8:23699433-23712320	-	-	5.21917	4.0698	6.36854	OK	6.67087	5.26124	8.0805	OK	20.1497	16.5173	23.7822	OK	14.0402	11.4117	16.6687	OK	2.04386	1.47727	2.61046	OK	11.0935	8.94706
5173	chr22	28612444	28613443	+	0	NA	intron (NM_001145418, intron 5 of 22)	AluJo|SINE|Alu	-242914	NR_106713	102466081		NR_106713	ENSG00000276162	MIR5739	hsa-mir-5739	microRNA 5739	ncRNA	MIR5739	-	-	MIR5739	MIR5739	TSS9402	chr22:28315363-29075853	-	-	0	0	0	OK	0	0	0	OK	0	0	0	OK	0	0	0	OK	0	0	0	OK	0	0
1676	chr14	74078858	74079857	+	0	NA	Intergenic	CpG	-4191	NM_001037162	641372	Hs.122038	NM_001037162	ENSG00000205669	ACOT6	C14orf42|c14_5530	acyl-CoA thioesterase 6	protein-coding	ACOT6	-	-	ACOT6	ACOT6	TSS12824	chr14:74083547-74086592	-	-	0.0237814	0	0.160939	OK	0	0	0	OK	0	0	0	OK	0	0	0	OK	0	0	0	OK	0.0581339	0
1388	chr17	3626736	3627735	+	0	NA	promoter-TSS (NM_031965)	promoter-TSS (NM_031965)	38	NM_031965	83903	Hs.534059	NM_031965	ENSG00000177602	GSG2	HASPIN	germ cell associated 2, haspin	protein-coding	GSG2	-	-	GSG2	GSG2	TSS22791	chr17:3617918-3704537	-	-	8.32892	5.72061	10.9372	OK	6.06201	4.00146	8.12256	OK	4.08806	2.31926	5.85686	OK	5.88259	3.74751	8.01768	OK	6.93926	4.42026	9.45826	OK	2.34139	1.01037
3134	chr12	19924385	19925384	+	0	NA	Intergenic	LTR78|LTR|ERV1	-242735	NR_040098	100506393	Hs.658356	NR_040098	ENSG00000256287	LOC100506393	-	uncharacterized LOC100506393	ncRNA	LOC100506393	-	-	LOC100506393	LOC100506393	TSS28922	chr12:20167618-20251802	-	-	0	0	0	OK	0	0	0	OK	0	0	0	OK	0	0	0	OK	0	0	0	OK	0	0
346	chr16	84733091	84734090	+	0	NA	promoter-TSS (NM_005153)	promoter-TSS (NM_005153)	35	NM_005153	9100	Hs.136778	NM_005153	ENSG00000103194	USP10	UBPO	ubiquitin specific peptidase 10	protein-coding	USP10	-	-	USP10	USP10	TSS8300	chr16:84733554-84813527	-	-	61.9764	51.7845	72.1683	OK	45.6579	37.9242	53.3916	OK	46.9192	39.0377	54.8007	OK	39.3992	32.6093	46.1892	OK	53.582	44.5973	62.5666	OK	32.0267	26.437
5245	chr2	26980570	26981569	+	0	NA	Intergenic	MER41A|LTR|ERV1	-6073	NM_017877	54978	Hs.1594	NM_017877	ENSG00000213699	SLC35F6	ANT2BP|C2orf18|TANGO9	solute carrier family 35 member F6	protein-coding	SLC35F6	-	-	SLC35F6	SLC35F6	TSS24296	chr2:26987141-27004099	-	-	6.28504	4.9369	7.63318	OK	7.54746	5.99276	9.10216	OK	6.55531	5.17813	7.93248	OK	5.60185	4.38557	6.81813	OK	7.19406	5.69967	8.68845	OK	6.7092	5.29842
3085	chr14	86429628	86430627	+	0	NA	intron (NR_110155, intron 1 of 3)	MLT1J1|LTR|ERVL-MaLR	29105	NR_110155	101928767	Hs.536380	NR_110155		LOC101928767	-	uncharacterized LOC101928767	ncRNA	LOC101928767	-	-	LOC101928767	LOC101928767	TSS15388	chr14:86401021-86596121	-	-	0	0	0	OK	0.315033	0	0.75732	OK	0	0	0	OK	0.283442	0	0.622473	OK	0.123588	0	0.346589	OK	0.32148	0
5453	chr18	55459936	55460935	+	0	NA	intron (NM_005603, intron 1 of 27)	L2a|LINE|L2	9892	NM_005603	5205	Hs.216623	NM_005603	ENSG00000081923	ATP8B1	ATPIC|BRIC|FIC1|ICP1|PFIC|PFIC1	ATPase phospholipid transporting 8B1	protein-coding	ATP8B1	-	-	ATP8B1	ATP8B1	TSS13463	chr18:55297533-55470327	-	-	40.9349	34.2156	47.6541	OK	18.8259	15.5504	22.1014	OK	18.6728	15.3764	21.9692	OK	6.40559	5.10193	7.70925	OK	19.9363	16.4832	23.3895	OK	8.05423	6.4974
3171	chr7	44144644	44145643	+	0	NA	intron (NM_001129, intron 1 of 20)	intron (NM_001129, intron 1 of 20)	1183	NM_001129	165	Hs.439463	NM_001129	ENSG00000106624	AEBP1	ACLP	AE binding protein 1	protein-coding	AEBP1	-	-	AEBP1	AEBP1	TSS32616	chr7:44143959-44154164	-	-	10.8229	8.64742	12.9985	OK	19.5693	16.0069	23.1317	OK	0.00546611	0	0.0376266	OK	2.02309	1.44902	2.59716	OK	4.74415	3.64287	5.84543	OK	12.1125	9.75388
427	chr5	178772285	178773284	+	0	NA	promoter-TSS (NM_021599)	promoter-TSS (NM_021599)	-353	NM_014244	9509	Hs.23871	NM_014244	ENSG00000087116	ADAMTS2	ADAM-TS2|ADAMTS-2|ADAMTS-3|NPI|PC I-NP|PCI-NP|PCINP|PCPNI|PNPI	ADAM metallopeptidase with thrombospondin type 1 motif 2	protein-coding	ADAMTS2	-	-	ADAMTS2	ADAMTS2	TSS17505	chr5:178537851-178772431	-	-	18.8802	14.1004	23.66	OK	25.0316	19.4745	30.5887	OK	5.19347	3.72726	6.65968	OK	7.62006	5.70616	9.53397	OK	23.1783	18.5473	27.8094	OK	28.9045	23.6873
5121	chr11	61728913	61729912	+	0	NA	intron (NM_001139443, intron 8 of 8)	intron (NM_001139443, intron 8 of 8)	5720	NM_002032	2495	Hs.524910	NM_002032	ENSG00000167996	FTH1	FHC|FTH|FTHL6|HFE5|PIG15|PLIF	ferritin heavy chain 1	protein-coding	FTH1	-	-	FTH1	FTH1	TSS15377	chr11:61717355-61735132	-	-	1070.42	900.967	1239.87	OK	1761.91	1482.35	2041.48	OK	1598.55	1344.91	1852.19	OK	1280.9	1076.88	1484.92	OK	738.027	620.763	855.292	OK	971.417	817.452
6593	chr19	1985650	1986649	+	0	NA	3' UTR (NM_017797, exon 9 of 9)	3' UTR (NM_017797, exon 9 of 9)	29553	NM_017797	55643	Hs.465543	NM_017797	ENSG00000133243	BTBD2	-	BTB domain containing 2	protein-coding	BTBD2	-	-	BTBD2	BTBD2	TSS1257	chr19:1985446-2015702	-	-	3.00516	2.06502	3.9453	OK	3.86528	2.78707	4.94349	OK	3.29891	2.35685	4.24097	OK	4.7877	3.52432	6.05107	OK	3.94012	2.83411	5.04612	OK	5.73053	4.27209
6503	chr14	102972952	102973951	+	0	NA	exon (NM_152326, exon 4 of 4)	exon (NM_152326, exon 4 of 4)	2677	NM_152326	122416	Hs.432945	NM_152326	ENSG00000156381	ANKRD9	-	ankyrin repeat domain 9	protein-coding	ANKRD9	-	-	ANKRD9	ANKRD9	TSS24762	chr14:102973197-102976128	-	-	10.1416	7.15373	13.1295	OK	6.95617	4.79082	9.12152	OK	2.95241	1.76607	4.13875	OK	2.77312	1.61474	3.93151	OK	4.30473	2.75107	5.8584	OK	1.42647	0.631539
4735	chr18	7078309	7079308	+	0	NA	intron (NM_005559, intron 3 of 62)	AluSc|SINE|Alu	39005	NM_005559	284217	Hs.270364	NM_005559	ENSG00000101680	LAMA1	LAMA|PTBHS|S-LAM-alpha	laminin subunit alpha 1	protein-coding	LAMA1	-	-	LAMA1	LAMA1	TSS144	chr18:6941742-7117813	-	-	4.5075	3.64233	5.37266	OK	6.72808	5.50711	7.94906	OK	1.83584	1.42707	2.24462	OK	1.47672	1.13117	1.82226	OK	4.13851	3.33572	4.9413	OK	3.10741	2.47644
82	chr19	34965924	34966923	+	0	NA	Intergenic	Intergenic	-6457	NM_001080436	126374	Hs.585010	NM_001080436	ENSG00000142279	WTIP	-	Wilms tumor 1 interacting protein	protein-coding	WTIP	-	-	WTIP	WTIP	TSS10250	chr19:34972879-34992085	-	-	1.54513	0.891174	2.1991	OK	0.585036	0.233627	0.936445	OK	0.322177	0.0783976	0.565957	OK	0.157469	0	0.322985	OK	1.04728	0.538823	1.55573	OK	0.36697	0.0930878
3464	chr14	105155986	105156985	+	0	NA	intron (NM_022489, intron 1 of 22)	CpG	542	NM_022489	64423	Hs.24956	NM_022489	ENSG00000203485	INF2	C14orf151|C14orf173|CMTDIE|FSGS5|pp9484	inverted formin, FH2 and WH2 domain containing	protein-coding	INF2	-	-	INF2	INF2	TSS1661	chr14:105155942-105185947	-	-	18.2936	14.1432	22.444	OK	15.2134	11.6763	18.7505	OK	10.9002	7.9007	13.8998	OK	14.4083	11.0864	17.7303	OK	20.9839	16.1918	25.7759	OK	16.1782	12.4415
2202	chr3	195635895	195636894	+	0	NA	promoter-TSS (NM_005781)	promoter-TSS (NM_005781)	-514	NM_005781	10188	Hs.518513	NM_005781	ENSG00000061938	TNK2	ACK|ACK-1|ACK1|p21cdc42Hs	tyrosine kinase non receptor 2	protein-coding	TNK2	-	-	TNK2	TNK2	TSS10036,TSS23799,TSS24564	chr3:195590234-195635880	-	-	0.584853	0.315218	0.854488	OK	0.86973	0.545406	1.19406	OK	0.862961	0.55181	1.17411	OK	0.95743	0.616219	1.29864	OK	1.2238	0.819269	1.62832	OK	1.42549	0.964055
650	chrX	100306234	100307233	+	0	NA	intron (NM_024917, intron 1 of 13)	CpG	372	NM_001167971	79979	Hs.496501	NM_024917	ENSG00000188917	TRMT2B	CXorf34|dJ341D10.3	tRNA methyltransferase 2 homolog B	protein-coding
4635	chr5	154937235	154938234	+	0	NA	Intergenic	FLAM_C|SINE|Alu	544419	NM_001099293	285643	Hs.567824	NM_001099293	ENSG00000226650	KIF4B	-	kinesin family member 4B	protein-coding	KIF4B	-	-	KIF4B	KIF4B	TSS2584	chr5:154393259-154397685	-	-	0.946933	0.639313	1.25455	OK	1.38097	0.976881	1.78506	OK	0.455962	0.263995	0.647929	OK	1.56059	1.12032	2.00085	OK	0.925964	0.621356	1.23057	OK	0.573546	0.353524
1154	chr1	145395219	145396218	+	0	NA	intron (NM_001039703, intron 68 of 85)	intron (NM_001039703, intron 68 of 85)	-13314	NR_125968	101928979	Hs.735893	NR_125967	ENSG00000233396	LINC01719	-	long intergenic non-protein coding RNA 1719	ncRNA
895	chr15	71880763	71881762	+	0	NA	intron (NM_001286429, intron 1 of 11)	intron (NM_001286429, intron 1 of 11)	41721	NM_001286429	79875	Hs.387057	NM_024817	ENSG00000187720	THSD4	ADAMTSL-6|ADAMTSL6|FVSY9334|PRO34005	thrombospondin type 1 domain containing 4	protein-coding
1763	chr2	197503768	197504767	+	0	NA	promoter-TSS (NM_001080539)	promoter-TSS (NM_001080539)	-89	NM_001080539	284992	Hs.132519	NM_173466	ENSG00000144395	CCDC150	-	coiled-coil domain containing 150	protein-coding
4499	chrX	38834298	38835297	+	0	NA	Intergenic	MLT1H2|LTR|ERVL-MaLR	-171661	NR_046706	100874211	Hs.662789	NR_046706		MID1IP1-AS1	-	MID1IP1 antisense RNA 1	ncRNA	MID1IP1-AS1	-	-	MID1IP1-AS1	MID1IP1-AS1	TSS14225	chrX:38660500-38665783	-	-	0.0534423	0	0.366201	OK	0	0	0	OK	0.282241	0	1.05926	OK	0.143529	0	0.670383	OK	0.0563061	0	0.363422	OK	0.0623998	0
5237	chr5	33345350	33346349	+	0	NA	Intergenic	AluSg|SINE|Alu	-94953	NM_001258437	6897	Hs.481860	NM_152295	ENSG00000113407	TARS	ThrRS	threonyl-tRNA synthetase	protein-coding
69	chr10	33294204	33295203	+	0	NA	Intergenic	Intergenic	-47410	NM_002211	3688	Hs.643813	NM_002211	ENSG00000150093	ITGB1	CD29|FNRB|GPIIA|MDF2|MSK12|VLA-BETA|VLAB	integrin subunit beta 1	protein-coding	ITGB1	-	-	ITGB1	ITGB1	TSS11504,TSS11656,TSS28511	chr10:33189245-33247293	-	-	634.601	533.47	735.731	OK	582.164	489.893	674.434	OK	828.246	695.98	960.511	OK	561.342	473.383	649.301	OK	541.119	454.358	627.88	OK	607.034	510.123
4299	chr14	90484359	90485358	+	0	NA	intron (NM_001008744, intron 13 of 15)	AluJb|SINE|Alu	-43251	NM_022054	56659	Hs.510191	NM_022054	ENSG00000152315	KCNK13	K2p13.1|THIK-1|THIK1	potassium two pore domain channel subfamily K member 13	protein-coding	KCNK13	-	-	KCNK13	KCNK13	TSS2656	chr14:90528108-90652201	-	-	0	0	0	OK	0	0	0	OK	0	0	0	OK	0	0	0	OK	0	0	0	OK	0.0123095	0
1910	chr2	43454197	43455196	+	0	NA	promoter-TSS (NM_006887)	promoter-TSS (NM_006887)	346	NR_027251	100129726	Hs.194480	NM_178529	ENSG00000279873	LINC01126	-	long intergenic non-protein coding RNA 1126	ncRNA
2762	chr9	127458183	127459182	+	0	NA	intron (NR_038975, intron 1 of 1)	intron (NR_038975, intron 1 of 1)	2693	NR_029782	406956		NR_029782	ENSG00000207737	MIR181B2	MIRN181B2|mir-181b-2	microRNA 181b-2	ncRNA	MIR181B2	-	-	MIR181B2	MIR181B2	TSS31555	chr9:127279553-127533589	-	-	0	0	0	OK	0	0	0	OK	0	0	0	OK	0	0	0	OK	0	0	0	OK	0	0
3076	chr20	44642533	44643532	+	0	NA	exon (NM_004994, exon 12 of 13)	exon (NM_004994, exon 12 of 13)	5485	NM_004994	4318	Hs.297413	NM_004994	ENSG00000100985	MMP9	CLG4B|GELB|MANDP2|MMP-9	matrix metallopeptidase 9	protein-coding	MMP9	-	-	MMP9	MMP9	TSS4387	chr20:44637546-44645200	-	-	0.05553	0	0.187189	OK	0.0374659	0	0.106325	OK	0.0125038	0	0.0728245	OK	0.0240665	0	0.091836	OK	0	0	0	OK	0	0
224	chr8	98963092	98964091	+	0	NA	intron (NM_002380, intron 4 of 18)	intron (NM_002380, intron 4 of 18)	82342	NM_001317748	4147	Hs.189445	NM_002380	ENSG00000132561	MATN2	-	matrilin 2	protein-coding
3608	chr10	16834338	16835337	+	0	NA	intron (NM_152724, intron 1 of 7)	intron (NM_152724, intron 1 of 7)	24616	NM_152724	6251	Hs.524161	NM_012425	ENSG00000148484	RSU1	RSP-1	Ras suppressor protein 1	protein-coding
3402	chr16	47035261	47036260	+	0	NA	Intergenic	AluSx|SINE|Alu	-28135	NM_005880	10294	Hs.368078	NM_005880	ENSG00000069345	DNAJA2	CPR3|DJ3|DJA2|DNAJ|DNJ3|HIRIP4|PRO3015|RDJ2	DnaJ heat shock protein family (Hsp40) member A2	protein-coding	DNAJA2	-	-	DNAJA2	DNAJA2	TSS16705	chr16:46989273-47007625	-	-	37.3203	30.885	43.7556	OK	33.2025	27.3732	39.0317	OK	33.1772	27.3048	39.0496	OK	33.0696	27.2647	38.8745	OK	40.9658	33.9109	48.0208	OK	39.8813	33.0028
3264	chr14	35229372	35230371	+	0	NA	intron (NM_013448, intron 24 of 26)	AluJb|SINE|Alu	-45842	NM_138638	1073	Hs.180141	NM_021914	ENSG00000165410	CFL2	NEM7	cofilin 2	protein-coding
6050	chr2	90413539	90414538	+	0	NA	Intergenic	CpG	1302154	NR_039635	100616399		NR_039635	ENSG00000265510	MIR4436A	mir-4436a	microRNA 4436a	ncRNA	MIR4436A	-	-	MIR4436A	MIR4436A	TSS29845	chr2:89111883-89111968	-	-	0	0	0	OK	0	0	0	OK	0	0	0	OK	0	0	0	OK	0	0	0	OK	0	0
2711	chrX	131843700	131844699	+	0	NA	intron (NM_001077188, intron 3 of 5)	intron (NM_001077188, intron 3 of 5)	42529	NR_046691	100874102	Hs.619341	NR_046691	ENSG00000235849	HS6ST2-AS1	-	HS6ST2 antisense RNA 1	ncRNA	HS6ST2-AS1	-	-	HS6ST2-AS1	HS6ST2-AS1	TSS18584	chrX:131760037-132095423	-	-	0	0	0	OK	0	0	0	OK	0	0	0	OK	0	0	0	OK	0	0	0	OK	0	0
3501	chr19	13950757	13951756	+	0	NA	Intergenic	Intergenic	-3783	NR_029495	407010		NR_029495	ENSG00000207980	MIR23A	MIRN23A|hsa-mir-23a|miRNA23A|mir-23a	microRNA 23a	ncRNA	MIR23A	-	-	MIR23A	MIR23A	TSS7251	chr19:13947400-13947473	-	-	0	0	0	OK	0	0	0	OK	0	0	0	OK	0	0	0	OK	0	0	0	OK	0	0
1982	chr7	150812190	150813189	+	0	NA	exon (NM_001308305, exon 1 of 9)	exon (NM_001308305, exon 1 of 9)	924	NM_001308305	116988	Hs.647075	NM_031946	ENSG00000133612	AGAP3	AGAP-3|CENTG3|CRAG|MRIP-1|cnt-g3	ArfGAP with GTPase domain, ankyrin repeat and PH domain 3	protein-coding
5226	chr11	35696979	35697978	+	0	NA	intron (NM_017583, intron 1 of 4)	MLT1J|LTR|ERVL-MaLR	13178	NM_017583	54765	Hs.192103	NM_017583	ENSG00000166326	TRIM44	AN3|DIPB|HSA249128|MC7	tripartite motif containing 44	protein-coding	TRIM44	-	-	TRIM44	TRIM44	TSS31182	chr11:35684299-35832603	-	-	40.3882	33.762	47.0144	OK	31.9617	26.638	37.2854	OK	48.1987	40.3221	56.0754	OK	35.4444	29.576	41.3128	OK	40.1557	33.5451	46.7663	OK	27.3042	22.7109
2393	chr10	85898516	85899515	+	0	NA	promoter-TSS (NM_014394)	promoter-TSS (NM_014394)	-170	NM_014394	27069	Hs.352656	NM_014394	ENSG00000165678	GHITM	DERP2|HSPC282|MICS1|My021|PTD010|TMBIM5	growth hormone inducible transmembrane protein	protein-coding	GHITM	-	-	GHITM	GHITM	TSS32361	chr10:85899184-85913311	-	-	185.171	155.522	214.821	OK	210.896	177.173	244.619	OK	202.944	170.42	235.467	OK	199.72	167.736	231.704	OK	232.928	195.785	270.07	OK	228.693	192.198
3423	chr21	19200223	19201222	+	0	NA	Intergenic	MER57A1|LTR|ERV1	-9019	NM_001100421	54149	Hs.293811	NM_017447	ENSG00000154642	C21orf91	C21orf14|C21orf38|CSSG1|EURL|YG81	chromosome 21 open reading frame 91	protein-coding
6539	chr16	89786838	89787837	+	0	NA	promoter-TSS (NR_110122)	promoter-TSS (NR_110122)	-56	NM_152287	92822	Hs.290154	NM_152287	ENSG00000158805	ZNF276	CENP-Z|CENPZ|ZADT|ZFP276|ZNF477	zinc finger protein 276	protein-coding	ZNF276	-	-	ZNF276	ZNF276	TSS19089,TSS24576,TSS24578,TSS27800	chr16:89773540-89883065	-	-	3.2022	1.43045	4.97394	OK	3.03528	1.35319	4.71737	OK	2.99278	1.43147	4.5541	OK	2.76461	1.44869	4.08053	OK	3.78548	2.1258	5.44516	OK	3.61316	2.2242
5980	chr17	21904352	21905351	+	0	NA	intron (NR_027084, intron 1 of 1)	intron (NR_027084, intron 1 of 1)	789	NR_027084	284124	Hs.310247	NR_027084	ENSG00000276399	FLJ36000	-	uncharacterized FLJ36000	ncRNA	FLJ36000	-	-	FLJ36000	FLJ36000	TSS22638	chr17:21904061-21913070	-	-	0	0	0	OK	0	0	0	OK	0	0	0	OK	0	0	0	OK	0	0	0	OK	0	0
426	chr1	39570551	39571550	+	0	NA	intron (NM_012090, intron 1 of 92)	CpG	21211	NM_012090	23499	Hs.472475	NM_012090	ENSG00000127603	MACF1	ABP620|ACF7|MACF|OFC4	microtubule-actin crosslinking factor 1	protein-coding	MACF1	-	-	MACF1	MACF1	TSS25064	chr1:39549838-39952810	-	-	3.17902	2.57076	3.78728	OK	3.43913	2.79148	4.08678	OK	2.51518	2.00892	3.02143	OK	2.69933	2.16576	3.23289	OK	3.04033	2.46123	3.61944	OK	3.8933	3.18351
6798	chrX	9005302	9006301	+	0	NA	Intergenic	MSTA|LTR|ERVL-MaLR	-3633	NM_205849	171483	Hs.733351	NM_173696	ENSG00000177138	FAM9B	TEX39B	family with sequence similarity 9 member B	protein-coding
4127	chr3	17290611	17291610	+	0	NA	intron (NM_014744, intron 16 of 21)	Tigger1|DNA|TcMar-Tigger	316422	NR_037465	100500913		NR_037465	ENSG00000154822	MIR3714	-	microRNA 3714	ncRNA	MIR3714	-	-	MIR3714	MIR3714	TSS13540	chr3:16926451-17132098	-	-	0	0	0	OK	0	0	0	OK	0	0	0	OK	0	0	0	OK	0	0	0	OK	0	0
3222	chr4	174255982	174256981	+	0	NA	promoter-TSS (NM_001130688)	promoter-TSS (NM_001130688)	-886	NM_002129	3148	Hs.434953	NM_002129	ENSG00000164104	HMGB2	HMG2	high mobility group box 2	protein-coding	HMGB2	-	-	HMGB2	HMGB2	TSS12013,TSS28839,TSS8484	chr4:174252526-174255595	-	-	138.648	115.358	161.939	OK	165.445	137.716	193.174	OK	117.932	97.842	138.022	OK	305.125	255.661	354.59	OK	105.519	87.5496	123.489	OK	49.6345	40.3894
1435	chr17	4870858	4871857	+	0	NA	promoter-TSS (NM_004890)	promoter-TSS (NM_004890)	-225	NM_004890	9552	Hs.90436	NM_004890	ENSG00000091640	SPAG7	ACRP|FSA-1	sperm associated antigen 7	protein-coding	SPAG7	-	-	SPAG7	SPAG7	TSS18212	chr17:4862520-4871132	-	-	69.2759	56.1607	82.3911	OK	78.9626	64.3369	93.5884	OK	69.265	56.3126	82.2174	OK	93.6495	76.7503	110.549	OK	75.4822	61.4616	89.5027	OK	99.7836	81.8422
279	chr3	53915712	53916711	+	0	NA	promoter-TSS (NM_022899)	promoter-TSS (NM_022899)	18	NM_022899	93973	Hs.412186	NM_022899	ENSG00000113812	ACTR8	ARP8|INO80N|hArp8	ARP8 actin-related protein 8 homolog	protein-coding	ACTR8	-	-	ACTR8	ACTR8	TSS15850	chr3:53901093-53916229	-	-	13.6872	11.0943	16.28	OK	11.4632	9.22686	13.6995	OK	11.9765	9.64465	14.3083	OK	10.7091	8.60073	12.8175	OK	13.7885	11.1799	16.3972	OK	14.0603	11.4079
2408	chrX	12843603	12844602	+	0	NA	Intergenic	Intergenic	34628	NM_001039091	5634	Hs.654581	NM_002765	ENSG00000101911	PRPS2	PRSII	phosphoribosyl pyrophosphate synthetase 2	protein-coding
6569	chr17	46620129	46621128	+	0	NA	exon (NM_002145, exon 2 of 2)	exon (NM_002145, exon 2 of 2)	-1085	NR_102279	100874362	Hs.171806	NR_102279	ENSG00000230148	HOXB-AS1	-	HOXB cluster antisense RNA 1	ncRNA	HOXB-AS1	-	-	HOXB-AS1	HOXB-AS1	TSS467	chr17:46620018-46651810	-	-	0	0	0	OK	0.0444615	0	0.234617	OK	0	0	0	OK	0	0	0	OK	0	0	0	OK	0	0
483	chr2	89226932	89227931	+	0	NA	Intergenic	LTR55|LTR|ERV	115547	NR_039635	100616399		NR_039635	ENSG00000265510	MIR4436A	mir-4436a	microRNA 4436a	ncRNA	MIR4436A	-	-	MIR4436A	MIR4436A	TSS29845	chr2:89111883-89111968	-	-	0	0	0	OK	0	0	0	OK	0	0	0	OK	0	0	0	OK	0	0	0	OK	0	0
498	chr10	77168715	77169714	+	0	NA	TTS (NR_024421)	TTS (NR_024421)	299	NR_110304	101929234	Hs.694695	NR_110304		LOC101929234	-	uncharacterized LOC101929234	ncRNA	LOC101929234	-	-	LOC101929234	LOC101929234	TSS11155	chr10:77168914-77171082	-	-	0.0775532	0	0.232899	OK	0.156731	0	0.381094	OK	0.0391521	0	0.140715	OK	0.0362277	0	0.137341	OK	0.01852	0	0.120975	OK	0.084446	0
4145	chr5	151196114	151197113	+	0	NA	Intergenic	Intergenic	-44876	NR_132345	100652758	Hs.587054	NM_001278082		LOC100652758	-	uncharacterized LOC100652758	ncRNA
3520	chr3	64344329	64345328	+	0	NA	Intergenic	Intergenic	-133697	NM_198859	166336	Hs.148105	NM_198859	ENSG00000163637	PRICKLE2	EPM5	prickle planar cell polarity protein 2	protein-coding	PRICKLE2	-	-	PRICKLE2	PRICKLE2	TSS14967	chr3:64053639-64211131	-	-	1.15369	0.853257	1.45413	OK	2.58999	2.02481	3.15517	OK	1.86246	1.42565	2.29927	OK	2.50924	1.95793	3.06054	OK	1.03874	0.760659	1.31683	OK	2.32272	1.80691
2055	chr6	150098768	150099767	+	0	NA	intron (NM_001252050, intron 3 of 6)	AluSz6|SINE|Alu	28436	NM_001252050	5110	Hs.279257	NM_005389	ENSG00000120265	PCMT1	PIMT	protein-L-isoaspartate (D-aspartate) O-methyltransferase	protein-coding
5576	chr15	43425406	43426405	+	0	NA	non-coding (NR_144542, exon 1 of 13)	non-coding (NR_144542, exon 1 of 13)	183	NM_001347029	80021	Hs.511175	NM_024956	ENSG00000137842	TMEM62	-	transmembrane protein 62	protein-coding
1487	chr2	95787183	95788182	+	0	NA	promoter-TSS (NM_031902)	promoter-TSS (NM_031902)	90	NM_031902	64969	Hs.655259	NM_031902	ENSG00000144029	MRPS5	MRP-S5|S5mt	mitochondrial ribosomal protein S5	protein-coding	MRPS5	-	-	MRPS5	MRPS5	TSS28055	chr2:95752951-95787754	-	-	30.0311	24.1508	35.9113	OK	32.6005	26.3092	38.8917	OK	24.5066	19.5754	29.4378	OK	29.1959	23.4843	34.9075	OK	33.5955	27.1537	40.0372	OK	36.7747	29.7957
4311	chr8	101734337	101735336	+	0	NA	promoter-TSS (NM_002568)	promoter-TSS (NM_002568)	-521	NM_002568	26986	Hs.387804	NM_002568	ENSG00000070756	PABPC1	PAB1|PABP|PABP1|PABPC2|PABPL1	poly(A) binding protein cytoplasmic 1	protein-coding	PABPC1	-	-	PABPC1	PABPC1	TSS15361	chr8:101715143-101734315	-	-	141.761	118.829	164.693	OK	122.276	102.376	142.176	OK	146.292	122.645	169.939	OK	157.985	132.511	183.458	OK	166.769	139.847	193.692	OK	161.641	135.629
4698	chr8	5662464	5663463	+	0	NA	Intergenic	Intergenic	601106	NR_040040	100287015	Hs.156928	NR_040040	ENSG00000246089	LOC100287015	-	uncharacterized LOC100287015	ncRNA	LOC100287015	-	-	LOC100287015	LOC100287015	TSS20713	chr8:6261076-6264069	-	-	0.575141	0.265685	0.884598	OK	0.969998	0.541462	1.39853	OK	0.9257	0.50962	1.34178	OK	1.26664	0.768174	1.7651	OK	0.792556	0.421711	1.1634	OK	1.51599	0.958889
2028	chr17	79370965	79371964	+	0	NA	Intergenic	CpG	-2057	NM_001291324	57597	Hs.514580	NM_024696	ENSG00000266074	BAHCC1	BAHD2	BAH domain and coiled-coil containing 1	protein-coding
1540	chr1	116981411	116982410	+	0	NA	intron (NR_125972, intron 2 of 3)	AluSz|SINE|Alu	-20666	NR_027646	84852	Hs.664752	NM_032766	ENSG00000203865	ATP1A1-AS1	ATP1A1OS|C1orf203	ATP1A1 antisense RNA 1	ncRNA
3075	chr22	42764516	42765515	+	0	NA	non-coding (NR_120595, exon 1 of 2)	non-coding (NR_120595, exon 1 of 2)	199	NR_120597	102723775	Hs.335413	NR_120595	ENSG00000229891	LINC01315	lnc-C22orf32-1	long intergenic non-protein coding RNA 1315	ncRNA
1606	chr1	223403570	223404569	+	0	NA	intron (NM_017982, intron 5 of 8)	MIRb|SINE|MIR	-87445	NM_003268	7100	Hs.604542	NM_003268	ENSG00000187554	TLR5	MELIOS|SLE1|SLEB1|TIL3	toll like receptor 5	protein-coding	TLR5	-	-	TLR5	TLR5	TSS6337	chr1:223282747-223316624	-	-	0.0418364	0	0.0981667	OK	0.0984993	0.0189589	0.17804	OK	0.0141459	0	0.0552202	OK	0.0564932	0	0.11835	OK	0.00830599	0	0.0376856	OK	0.121463	0.0318423
6156	chr16	87459194	87460193	+	0	NA	intron (NM_015144, intron 3 of 12)	intron (NM_015144, intron 3 of 12)	33892	NM_022818	81631	Hs.356061	NM_022818	ENSG00000140941	MAP1LC3B	ATG8F|LC3B|MAP1A/1BLC3|MAP1LC3B-a	microtubule associated protein 1 light chain 3 beta	protein-coding	MAP1LC3B	-	-	MAP1LC3B	MAP1LC3B	TSS2529	chr16:87425800-87438380	-	-	95.3902	79.5629	111.217	OK	136.744	114.445	159.043	OK	71.3844	59.2784	83.4905	OK	91.3903	76.1666	106.614	OK	171.879	144.102	199.657	OK	182.05	152.7
2064	chr17	79448043	79449042	+	0	NA	Intergenic	CpG	-30328	NR_036152	100422944		NR_036152	ENSG00000266189	MIR3186	mir-3186	microRNA 3186	ncRNA	MIR3186	-	-	MIR3186	MIR3186	TSS18870	chr17:79373520-79433358	-	-	0	0	0	OK	0	0	0	OK	0	0	0	OK	0	0	0	OK	0	0	0	OK	0	0
99	chr16	89306694	89307693	+	0	NA	Intergenic	AluSx|SINE|Alu	23082	NM_182531	197320	Hs.647385	NM_182531	ENSG00000170100	ZNF778	-	zinc finger protein 778	protein-coding	ZNF778	-	-	ZNF778	ZNF778	TSS31201	chr16:89284110-89295965	-	-	1.97929	1.42284	2.53574	OK	1.75975	1.24803	2.27147	OK	2.17212	1.57382	2.77043	OK	1.50258	1.04708	1.95808	OK	1.80603	1.28204	2.33002	OK	1.65109	1.16338
4767	chr6	26026811	26027810	+	0	NA	exon (NM_003544, exon 1 of 1)	exon (NM_003544, exon 1 of 1)	170	NM_003544	8366	Hs.143080	NM_003544	ENSG00000278705	HIST1H4B	H4/I|H4FI	histone cluster 1 H4 family member b	protein-coding	HIST1H4B	-	-	HIST1H4B	HIST1H4B	TSS3165	chr6:26027123-26027480	-	-	0	0	0	OK	0	0	0	OK	0.989998	0	2.92748	OK	1.20896	0	3.24892	OK	0.537751	0	1.45624	OK	0.443598	0
5424	chr1	143278277	143279276	+	0	NA	Intergenic	Intergenic	-76537	NR_110761	102723769	Hs.652926	NR_110761		LOC102723769	-	uncharacterized LOC102723769	ncRNA	LOC102723769	-	-	LOC102723769	LOC102723769	TSS29550	chr1:143134602-143202239	-	-	0	0	0	OK	0	0	0	OK	0	0	0	OK	0	0	0	OK	0	0	0	OK	0.0174439	0
3553	chr4	13990774	13991773	+	0	NA	Intergenic	MLT1C|LTR|ERVL-MaLR	-122319	NR_033931	152742	Hs.135435	NR_033931	ENSG00000248698	LINC01085	-	long intergenic non-protein coding RNA 1085	ncRNA	LINC01085	-	-	LINC01085	LINC01085	TSS32373	chr4:14113591-14141676	-	-	10.5545	8.21949	12.8895	OK	19.5125	15.6082	23.4169	OK	8.54962	6.5307	10.5685	OK	9.84579	7.62909	12.0625	OK	9.59266	7.42555	11.7598	OK	5.64137	4.21053
5218	chrX	66886151	66887150	+	0	NA	intron (NM_001011645, intron 2 of 7)	L1MA3|LINE|L1	97967	NM_001011645	367	Hs.76704	NM_000044	ENSG00000169083	AR	AIS|AR8|DHTR|HUMARA|HYSP1|KD|NR3C4|SBMA|SMAX1|TFM	androgen receptor	protein-coding
4892	chr3	17317271	17318270	+	0	NA	intron (NM_014744, intron 15 of 21)	MLT1A0|LTR|ERVL-MaLR	343082	NR_037465	100500913		NR_037465	ENSG00000154822	MIR3714	-	microRNA 3714	ncRNA	MIR3714	-	-	MIR3714	MIR3714	TSS13540	chr3:16926451-17132098	-	-	0	0	0	OK	0	0	0	OK	0	0	0	OK	0	0	0	OK	0	0	0	OK	0	0
1933	chr17	7909278	7910277	+	0	NA	exon (NM_000180, exon 4 of 20)	exon (NM_000180, exon 4 of 20)	3789	NM_000180	3000	Hs.592109	NM_000180	ENSG00000132518	GUCY2D	CORD5|CORD6|CYGD|GUC1A4|GUC2D|LCA|LCA1|RCD2|RETGC-1|ROS-GC1|ROSGC|retGC	guanylate cyclase 2D, retinal	protein-coding	GUCY2D	-	-	GUCY2D	GUCY2D	TSS8260	chr17:7905987-7923658	-	-	0.00722686	0	0.0456404	OK	0	0	0	OK	0	0	0	OK	0	0	0	OK	0	0	0	OK	0	0
2022	chr13	50264921	50265920	+	0	NA	exon (NM_001278636, exon 1 of 5)	exon (NM_001278636, exon 1 of 5)	203	NR_103803	84650	Hs.433278	NM_032565	ENSG00000123179	EBPL	EBRP	emopamil binding protein like	protein-coding
790	chr1	183248033	183249680	+	0	NA	intron (NM_170706, intron 7 of 10)	intron (NM_170706, intron 7 of 10)	25153	NM_170706	23057	Hs.497123	NM_015039	ENSG00000157064	NMNAT2	C1orf15|PNAT2	nicotinamide nucleotide adenylyltransferase 2	protein-coding
6295	chr14	103770512	103771511	+	0	NA	Intergenic	Looper|DNA|PiggyBac	-12610	NR_135269	105378183	Hs.132624	NR_135269		LOC105378183	-	uncharacterized LOC105378183	ncRNA
5164	chr6	30781717	30782716	+	0	NA	non-coding (NR_130726, exon 2 of 2)	non-coding (NR_130726, exon 2 of 2)	16220	NR_130726	401247		NR_130726	ENSG00000214894	LINC00243	C6orf214|NCRNA00243	long intergenic non-protein coding RNA 243	ncRNA	LINC00243	-	-	LINC00243	LINC00243	TSS12587,TSS15583,TSS18971,TSS31605,TSS3356,TSS5274	chr6:30780642-30798436	-	-	0	0	0	OK	0.0510657	0	0.15658	OK	0	0	0	OK	0	0	0	OK	0.0219947	0	0.085852	OK	0.0807366	0
533	chr14	69406452	69407451	+	0	NA	intron (NM_001130005, intron 1 of 20)	intron (NM_001130005, intron 1 of 20)	39132	NM_001130004	87	Hs.235750	NM_001102	ENSG00000072110	ACTN1	BDPLT15	actinin alpha 1	protein-coding
4446	chr14	61646298	61647297	+	0	NA	Intergenic	Intergenic	101733	NM_001017970	161291	Hs.146180	NM_001017970	ENSG00000182107	TMEM30B	CDC50B	transmembrane protein 30B	protein-coding	TMEM30B	-	-	TMEM30B	TMEM30B	TSS3772	chr14:61744088-61748530	-	-	0	0	0	OK	0.00517371	0	0.0356099	OK	0	0	0	OK	0	0	0	OK	0	0	0	OK	0.0176599	0
2080	chr2	90449234	90450233	+	0	NA	Intergenic	CpG	1337849	NR_039635	100616399		NR_039635	ENSG00000265510	MIR4436A	mir-4436a	microRNA 4436a	ncRNA	MIR4436A	-	-	MIR4436A	MIR4436A	TSS29845	chr2:89111883-89111968	-	-	0	0	0	OK	0	0	0	OK	0	0	0	OK	0	0	0	OK	0	0	0	OK	0	0
4448	chr14	65266441	65267440	+	0	NA	intron (NM_000347, intron 7 of 30)	intron (NM_000347, intron 7 of 30)	-14536	NR_107009	102465841		NR_107009	ENSG00000070182	MIR7855	hsa-mir-7855	microRNA 7855	ncRNA	MIR7855	-	-	MIR7855	MIR7855	TSS4276	chr14:65213000-65289866	-	-	0	0	0	OK	0	0	0	OK	0	0	0	OK	0	0	0	OK	0	0	0	OK	0	0
3551	chr10	23727490	23728489	+	0	NA	promoter-TSS (NM_001145373)	promoter-TSS (NM_001145373)	-209	NM_001145373	220213	Hs.499042	NM_001145373	ENSG00000165312	OTUD1	DUBA7|OTDC1	OTU deubiquitinase 1	protein-coding	OTUD1	-	-	OTUD1	OTUD1	TSS22489	chr10:23728197-23731310	-	-	0.754785	0.419362	1.09021	OK	1.04268	0.627313	1.45805	OK	0.298846	0.09726	0.500431	OK	0.513783	0.246735	0.780832	OK	1.00303	0.603571	1.40249	OK	0.863381	0.500421
1122	chr9	139462057	139463056	+	0	NA	Intergenic	L1MB5|LINE|L1	20262	NR_121577	101928483	Hs.170035	NR_121577		NALT1	LINC01573|MIR4674HG|NALT	NOTCH1 associated lncRNA in T-cell acute lymphoblastic leukemia 1	ncRNA
6100	chr11	15985158	15986157	+	0	NA	Intergenic	Intergenic	5510	NR_106721	102464826		NR_106721	ENSG00000110693	MIR6073	hsa-mir-6073	microRNA 6073	ncRNA	MIR6073	-	-	MIR6073	MIR6073	TSS27783	chr11:15987994-16497935	-	-	0	0	0	OK	0	0	0	OK	0	0	0	OK	0	0	0	OK	0	0	0	OK	0	0
5474	chr12	27926411	27927410	+	0	NA	Intergenic	AluSz|SINE|Alu	-2701	NM_001146221	100287284	Hs.202178	NM_001146221	ENSG00000205693	MANSC4	-	MANSC domain containing 4	protein-coding	MANSC4	-	-	MANSC4	MANSC4	TSS14493	chr12:27915598-27924209	-	-	0	0	0	OK	0	0	0	OK	0	0	0	OK	0	0	0	OK	0.0433531	0	0.164732	OK	0.0472628	0
2416	chr10	90639589	90640588	+	0	NA	5' UTR (NM_020799, exon 1 of 11)	5' UTR (NM_020799, exon 1 of 11)	144	NM_020799	57559	Hs.16229	NM_020799	ENSG00000138134	STAMBPL1	ALMalpha|AMSH-FP|AMSH-LP|bA399O19.2	STAM binding protein like 1	protein-coding	STAMBPL1	-	-	STAMBPL1	STAMBPL1	TSS31738	chr10:90639943-90683259	-	-	6.79264	5.13935	8.44593	OK	5.07183	3.74264	6.40103	OK	9.00062	6.92731	11.0739	OK	11.0419	8.62294	13.4609	OK	4.65038	3.4102	5.89056	OK	2.10089	1.39985
6045	chr2	26514163	26515162	+	0	NA	Intergenic	AluSx1|SINE|Alu	27255	NM_001145168	165082	Hs.631878	NM_153835	ENSG00000173567	ADGRF3	GPR113|PGR23	adhesion G protein-coupled receptor F3	protein-coding
4643	chr2	191402172	191403171	+	0	NA	Intergenic	LSU-rRNA_Hsa|rRNA|rRNA	-3203	NR_136298	100131211	Hs.659824	NM_001142645	ENSG00000189362	NEMP2	TMEM194B	nuclear envelope integral membrane protein 2	protein-coding
1053	chr6	149563687	149564686	+	0	NA	intron (NM_001292035, intron 2 of 6)	intron (NM_001292035, intron 2 of 6)	25126	NR_125861	23118	Hs.269775	NM_015093	ENSG00000055208	TAB2	CHTD2|MAP3K7IP2|TAB-2	TGF-beta activated kinase 1/MAP3K7 binding protein 2	protein-coding
414	chr8	96756412	96757411	+	0	NA	intron (NR_038205, intron 2 of 2)	intron (NR_038205, intron 2 of 2)	203665	NR_036611	100500773	Hs.741582	NR_036611		LOC100500773	-	serine and arginine rich splicing factor 3 pseudogene	pseudo	LOC100500773	-	-	LOC100500773	LOC100500773	TSS25516	chr8:96959212-96960576	-	-	0.0182777	0	0.118862	OK	0	0	0	OK	0	0	0	OK	0.0344093	0	0.139258	OK	0	0	0	OK	0	0
462	chr6	107435872	107436871	+	0	NA	promoter-TSS (NM_001080450)	promoter-TSS (NM_001080450)	-735	NM_001080450	57673	Hs.418045	NM_001080450	ENSG00000178409	BEND3	KIAA1553	BEN domain containing 3	protein-coding	BEND3	-	-	BEND3	BEND3	TSS33896	chr6:107386384-107435636	-	-	2.57131	1.97076	3.17185	OK	1.06542	0.754574	1.37627	OK	1.81633	1.36158	2.27107	OK	0.932366	0.653275	1.21146	OK	1.84132	1.38	2.30264	OK	0.48145	0.304904
3852	chr1	22292340	22293339	+	0	NA	Intergenic	AluJb|SINE|Alu	-10548	NM_007352	23436	Hs.728752	NM_007352	ENSG00000219073	CELA3B	CBPP|ELA3B	chymotrypsin like elastase family member 3B	protein-coding	CELA3B	-	-	CELA3B	CELA3B	TSS2107	chr1:22303417-22315847	-	-	0	0	0	OK	0	0	0	OK	0	0	0	OK	0	0	0	OK	0	0	0	OK	0	0
6556	chr17	17398094	17399667	+	0	NA	exon (NM_001199989, exon 2 of 2)	exon (NM_001199989, exon 2 of 2)	829	NM_016084	51655	Hs.25829	NM_016084	ENSG00000108551	RASD1	AGS1|DEXRAS1|MGC:26290	ras related dexamethasone induced 1	protein-coding	RASD1	-	-	RASD1	RASD1	TSS23103	chr17:17397752-17399709	-	-	0.378888	0	0.823515	OK	0.587737	0.0573774	1.1181	OK	0.660562	0.171244	1.14988	OK	0.750862	0.269533	1.23219	OK	0.311393	0	0.66105	OK	1.12929	0.495449
6359	chr7	119341977	119342976	+	0	NA	intron (NR_131960, intron 4 of 4)	MLT1A0|LTR|ERVL-MaLR	204953	NR_131963	105375475	Hs.566654	NR_131960	ENSG00000225546	LVCAT5	-	liver cancer-associated transcript 5	ncRNA
4558	chr6	21416386	21417385	+	0	NA	Intergenic	Intergenic	95238	NR_103790	100874531	Hs.112750	NR_103790	ENSG00000280989	LINC00581	linc-MBOAT1-4	long intergenic non-protein coding RNA 581	ncRNA	LINC00581	-	-	LINC00581	LINC00581	TSS14499	chr6:21486291-21512123	-	-	0	0	0	OK	0	0	0	OK	0	0	0	OK	0	0	0	OK	0	0	0	OK	0	0
263	chr13	38443337	38444336	+	0	NA	5' UTR (NM_001135958, exon 1 of 10)	5' UTR (NM_001135958, exon 1 of 10)	103	NM_001135956	7223	Hs.262960	NM_003306	ENSG00000133107	TRPC4	HTRP-4|HTRP4|TRP4	transient receptor potential cation channel subfamily C member 4	protein-coding
3746	chr22	19275102	19276101	+	0	NA	intron (NM_007098, intron 1 of 32)	MER44B|DNA|TcMar-Tigger	3638	NM_007098	8218	Hs.368266	NM_001835	ENSG00000070371	CLTCL1	CHC22|CLH22|CLTCL|CLTD	clathrin heavy chain like 1	protein-coding
5919	chr2	200781694	200782693	+	0	NA	intron (NM_153689, intron 1 of 1)	THE1C-int|LTR|ERVL-MaLR	6214	NM_153689	205327	Hs.154494	NM_153689	ENSG00000178074	C2orf69	-	chromosome 2 open reading frame 69	protein-coding	C2orf69	-	-	C2orf69	C2orf69	TSS13945	chr2:200775978-200792996	-	-	13.4232	10.865	15.9814	OK	13.2162	10.6509	15.7814	OK	18.1979	14.7869	21.6089	OK	15.1871	12.313	18.0612	OK	8.55108	6.7883	10.3139	OK	5.221	4.03707
4536	chr6	119558130	119559129	+	0	NA	intron (NM_005907, intron 6 of 12)	intron (NM_005907, intron 6 of 12)	-88271	NM_001100411	79632	Hs.443789	NM_024581	ENSG00000111879	FAM184A	C6orf60	family with sequence similarity 184 member A	protein-coding
4385	chr1	145204836	145205835	+	0	NA	intron (NM_001277444, intron 21 of 25)	intron (NM_001277444, intron 21 of 25)	-3778	NM_203458	388677	Hs.655156	NM_203458	ENSG00000264343	NOTCH2NL	N2N	notch 2 N-terminal like	protein-coding	NOTCH2NL	-	-	NOTCH2NL	NOTCH2NL	TSS33257	chr1:144146810-146467744	-	-	4.77939	1.13412	8.42465	OK	6.87117	1.54474	12.1976	OK	7.00945	1.73708	12.2818	OK	7.79011	2.08955	13.4907	OK	6.3979	2.19334	10.6025	OK	7.4354	1.63327
3361	chr6	127837008	127838007	+	0	NA	exon (NM_001012279, exon 2 of 12)	exon (NM_001012279, exon 2 of 12)	2993	NM_001012279	387104	Hs.319247	NM_001012279	ENSG00000214338	SOGA3	C6orf174|dJ403A15.3	SOGA family member 3	protein-coding	SOGA3	-	-	SOGA3	SOGA3	TSS13323	chr6:127759550-127840500	-	-	0.213369	0.128597	0.298141	OK	0.289519	0.183913	0.395124	OK	0.152684	0.0812249	0.224143	OK	0.128321	0.0654598	0.191183	OK	0.0972346	0.0441232	0.150346	OK	0.23123	0.141349
2985	chr2	19625399	19626398	+	0	NA	Intergenic	Intergenic	-67526	NM_145260	130497	Hs.123933	NM_145260	ENSG00000143867	OSR1	ODD	odd-skipped related transciption factor 1	protein-coding	OSR1	-	-	OSR1	OSR1	TSS1981	chr2:19551245-19558372	-	-	11.4094	8.69526	14.1235	OK	7.02833	5.17033	8.88634	OK	11.2888	8.65616	13.9215	OK	6.18551	4.51186	7.85917	OK	7.97991	5.94545	10.0144	OK	21.451	16.9928
3593	chr1	115711130	115712129	+	0	NA	Intergenic	Intergenic	-79508	NM_001308315	10100	Hs.310458	NM_005725	ENSG00000134198	TSPAN2	NET3|TSN2|TSPAN-2	tetraspanin 2	protein-coding
4979	chr10	53499206	53500205	+	0	NA	intron (NM_006258, intron 3 of 17)	AluJb|SINE|Alu	-40350	NM_015235	23283	Hs.591358	NM_015235	ENSG00000177613	CSTF2T	CstF-64T	cleavage stimulation factor subunit 2 tau variant	protein-coding	CSTF2T	-	-	CSTF2T	CSTF2T	TSS4795	chr10:52750910-54073888	-	-	20.5779	16.1309	25.0248	OK	12.5255	8.986	16.065	OK	22.3117	17.7043	26.919	OK	16.4198	12.8737	19.9659	OK	14.1995	10.2477	18.1513	OK	12.0252	8.9186
6656	chr22	38610113	38611112	+	0	NA	exon (NM_001161572, exon 3 of 3)	exon (NM_001161572, exon 3 of 3)	10115	NR_132774	106635525		NR_132774		SNORA92	-	small nucleolar RNA, H/ACA box 92	snoRNA
5932	chr7	112544691	112545690	+	0	NA	intron (NM_152556, intron 2 of 4)	MER74A|LTR|ERVL	34742	NM_152556	154743	Hs.489734	NM_152556	ENSG00000164603	BMT2	C7orf60	base methyltransferase of 25S rRNA 2 homolog	protein-coding
[truncated: 5,584 more rows]
[truncated: 6 more columns]
